# Supplementary material for: Genetic analysis of isoform usage in the human anti-viral response reveals influenza-specific regulation of ERAP2 transcripts under balancing selection
Source: Genome Res. 2018 Dec;28(12):1812–25. doi: 10.1101/gr.240390.118 (PMC6280757; doi:10.1101/gr.240390.118)
Supplement: Supplemental Material [file supp_gr.240390.118_SupplementalTable1.xlsx]

## Sheet: Sheet1
External ID	Stimulation	# Lanes in Aggregation	Reads Aligned in Pairs (PF)	Reads Aligned in Pairs %	Total Reads	PF Reads	PF Reads %	PF Noise Reads	PF Reads Aligned	PF Reads Aligned %	PF HQ Aligned Reads	PF HQ Aligned Bases	PF HQ Aligned Q20 Bases	Mean Read Length	Strand Balance %	Coding Bases (RNA)	Correct Strand Reads (RNA)	Incorrect Strand Reads (RNA)	Intergenic Bases (RNA)	Intronic Bases (RNA)	Median 3Prime Bias(RNA)	Median 5Prime Bias (RNA)	Median 5Prime-3Prime Bias(RNA)	Median CV Coverage (RNA)	% Coding Bases (RNA)	% Correct Strand Reads (RNA)	% Intergenic Bases (RNA)	% Intronic Bases (RNA)	% mRNA Bases (RNA)	% Ribosomal Bases (RNA)	% Usable Bases (RNA)	% UTR Bases (RNA)	PF Aligned Bases (RNA)	PF Bases (RNA)	Ribosomal Bases (RNA)	UTR Bases (RNA)	Batch	Filtered	ImmVar ID	IGTB	Predicted IGTB	Matched	Matched Perc	Stim	Date of Visit	Time of Visit	Sex	Age	Race
0916V111011_IFN	IFNB1	13	38865980	97.64	46974476	42601730	90.69	484	39804741	93.43	38180802	2900440469	2840013223	76	49.97	1662034701	33003071	52294	195835671	127200792	0.28	0.14	0.62	0.46	54.97	99.84	6.48	4.21	86.33	2.99	80.62	31.36	3023533166	3237731480	90338920	948182804	2	Genotype mismatched	0916V111011	IGTB916	IGTB1622	FALSE	0.022022	IFN	2012-02-01	08:01:00	F	25	African-American
0916V111011_baseline	Baseline	13	39984740	97.73	48806734	43717146	89.57	938	40914420	93.59	38843457	2950723764	2896811152	76	49.99	1621314821	32498501	69870	259161970	154411593	0.26	0.12	0.48	0.47	52.17	99.79	8.34	4.97	82.76	3.93	77.41	30.59	3107783001	3322503096	122283088	950700511	6	Genotype mismatched	0916V111011	IGTB916	IGTB1622	FALSE	0.022174	baseline	2012-02-01	08:01:00	F	25	African-American
0916V111011_FLU	Flu	13	31273748	97.11	45868724	39852380	86.88	43	32205417	80.81	31010929	2356008016	2307256011	76	49.96	1273169663	26045928	56820	179940773	130898210	0.25	0.14	0.66	0.47	52.04	99.78	7.36	5.35	84.51	2.79	68.26	32.47	2446483568	3028780880	68217904	794296502	5	Genotype mismatched	0916V111011	IGTB916	IGTB1622	FALSE	0.026042	FLU	2012-02-01	08:01:00	F	25	African-American
1654V022112_IFN	IFNB1	2	4922	72.28	18142	9168	50.53	1	6810	74.28	6512	494645	477828	76	49.81	247737	5569	24	39176	27940	0.42	0	0.56	0.95	47.89	99.57	7.57	5.4	85.82	1.2	63.71	37.93	517293	696768	6232	196208	2	Genotype mismatched	1654V022112	IGTB1654	IGTB775	FALSE	0.398778	IFN	2011-12-15	08:22:00	F	28	Caucasian
0809V082411_IFN	IFNB1	12	103484	65.25	2951462	2505940	84.91	1	158588	6.33	120876	9176822	8957497	76	48.63	4246708	89851	246	2421803	1096550	0.24	0	0.52	0.89	35.29	99.73	20.12	9.11	59.16	11.68	3.74	23.87	12035237	190451440	1405848	2872922	1	Genotype mismatched	0809V082411	IGTB809	IGTB1111	FALSE	0.491725	IFN	2011-03-15	08:05:00	M	46	African-American
1135V072711_IFN	IFNB1	13	47626560	95.66	67472110	55417996	82.13	2957	49786096	89.84	47982845	3645673856	3527469406	76	49.95	2063724897	41603146	68384	242456252	158050770	0.28	0.1	0.43	0.48	54.56	99.84	6.41	4.18	87.07	2.35	78.19	32.5	3782328344	4211767696	88704312	1229429918	4	Genotype mismatched	1135V072711	IGTB1135	IGTB1135	TRUE	0.502086	IFN	2011-07-27	07:50:00	M	46	African-American
1433V080211_IFN	IFNB1	13	43104498	98.02	52171458	46300386	88.75	185	43973479	94.97	42292415	3212679260	3156519027	76	49.98	1826202091	36490654	65816	218084378	143847764	0.27	0.12	0.52	0.48	54.68	99.82	6.53	4.31	86.41	2.76	82.02	31.73	3340055849	3518829336	92122944	1059870479	3	Genotype mismatched	1433V080211	IGTB1433	IGTB1433	TRUE	0.529605	IFN	2011-08-02	08:16:00	M	51	African-American
1679V020912_baseline	Baseline	13	49527862	97.64	60354930	53925424	89.35	1201	50724234	94.06	48753295	3703695743	3633669365	76	49.99	2119157457	42122574	85227	264565245	158715853	0.26	0.13	0.57	0.47	55	99.8	6.87	4.12	86.52	2.49	81.35	31.53	3853081037	4098332224	96021288	1214683120	6	Genotype mismatched	1679V020912	IGTB1679	IGTB1679	TRUE	0.557945	baseline	2012-02-09	08:20:00	F	31	African-American
0575V081111_IFN	IFNB1	13	33799014	96.43	50377608	43282144	85.92	14	35051485	80.98	33987455	2581953868	2519663556	76	49.95	1475618858	29581913	45013	160557306	109537442	0.27	0.12	0.53	0.46	55.42	99.85	6.03	4.11	88.06	1.79	71.28	32.64	2662597580	3289442944	47733624	869179273	1	Genotype mismatched	0575V081111	IGTB575	IGTB809	FALSE	0.562307	IFN	2011-08-24	08:17:00	M	29	Caucasian
0760V110211_FLU	Flu	13	28934840	97.28	40886830	36047888	88.17	29	29745279	82.52	28682471	2178874962	2134941568	76	49.97	1194191652	24540089	43625	153737474	102648182	0.25	0.12	0.56	0.49	52.85	99.82	6.8	4.54	86.08	2.58	70.99	33.22	2259381763	2739639488	58263120	750583929	5	Genotype mismatched	0760V110211	IGTB760	IGTB1112	FALSE	0.562982	FLU	2011-07-20	08:00:00	F	30	East Asian
1679V020912_IFN	IFNB1	13	35972160	97.64	43550106	39372086	90.41	516	36840463	93.57	35334866	2684379988	2629815888	76	49.98	1578516722	31084651	46806	155807829	100292664	0.26	0.13	0.61	0.47	56.41	99.85	5.57	3.58	87.91	2.94	82.21	31.5	2798492439	2992278536	82352688	881570089	2	Genotype mismatched	1679V020912	IGTB1679	IGTB1679	TRUE	0.570493	IFN	2012-02-09	08:20:00	F	31	African-American
1679V020912_FLU	Flu	13	31853760	96.97	46730230	40696646	87.09	47	32849578	80.72	31698081	2408202978	2357901710	76	49.96	1371694130	27638314	47717	153927085	102589857	0.25	0.15	0.69	0.46	54.97	99.83	6.17	4.11	87.6	2.12	70.68	32.64	2495387541	3092945096	52817112	814386028	5	Genotype mismatched	1679V020912	IGTB1679	IGTB1679	TRUE	0.591239	FLU	2012-02-09	08:20:00	F	31	African-American
0760V110211_baseline	Baseline	13	38782944	97.61	47648168	42803142	89.83	925	39731592	92.82	38092022	2893726527	2839721338	76	49.99	1627971349	32529130	59352	238091843	125463742	0.27	0.1	0.45	0.48	53.94	99.82	7.89	4.16	85.21	2.74	79.06	31.27	3018021420	3253038792	82814920	943736230	6	Genotype mismatched	0760V110211	IGTB760	IGTB1112	FALSE	0.604766	baseline	2011-07-20	08:00:00	F	30	East Asian
0760V110211_IFN	IFNB1	13	32082976	97.59	38848784	35303080	90.87	501	32874791	93.12	31578537	2398608632	2347237285	76	49.98	1386467754	27287613	47677	161643255	95792956	0.25	0.16	0.68	0.47	55.53	99.83	6.47	3.84	86.84	2.86	80.81	31.31	2496845007	2683034080	71326608	781676689	2	Genotype mismatched	0760V110211	IGTB760	IGTB1112	FALSE	0.606053	IFN	2011-07-20	08:00:00	F	30	East Asian
1331V012412_FLU	Flu	13	32531498	97.2	45563290	39618628	86.95	96	33468122	84.48	32255510	2450190352	2397439275	76	49.97	1417824970	28049062	48228	152667300	113815981	0.25	0.13	0.65	0.48	55.78	99.83	6.01	4.48	87.42	2.1	73.81	31.65	2542000459	3011015728	53274024	804460287	5	Genotype mismatched	1331V012412	IGTB1331	IGTB1331	TRUE	0.645299	FLU	2012-01-24	08:52:00	F	24	Caucasian
IGTB1553_unstim_Exp1	Baseline	2	44242390	98.1	49738582	47564822	95.63	644	45100748	94.82	43204984	3282204303	3250814391	76	49.97	1782731698	35731327	84778	293818077	216674600	0.26	0.15	0.62	0.46	52.04	99.76	8.58	6.32	82.31	2.79	78.01	30.28	3425959158	3614926472	95449920	1037341927	pilot	Genotype mismatched	0010V052510	IGTB10	IGTB1553	FALSE	0.662492	baseline	2012-01-12	08:47:00	F	29	Caucasian
1559V111511_FLU	Flu	13	28575294	96.92	39413424	34462356	87.44	43	29484632	85.56	28380612	2156097374	2105053461	76	49.95	1218308591	24622844	41301	140821688	91817198	0.25	0.12	0.55	0.48	54.4	99.83	6.29	4.1	87.18	2.44	74.55	32.78	2239734522	2619139056	54573472	734247854	5	Genotype mismatched	1559V111511	IGTB1559	IGTB1559	TRUE	0.681841	FLU	2011-11-15	08:46:00	M	20	East Asian
0839V112211_IFN	IFNB1	13	37767282	98.12	45646504	40481678	88.69	145	38490055	95.08	37081432	2816237902	2768383358	76	49.98	1631979298	31989828	59870	183245973	131811204	0.25	0.12	0.51	0.49	55.83	99.81	6.27	4.51	86.62	2.6	82.29	30.79	2922938703	3076607528	76116432	899871533	3	Genotype mismatched	0839V112211	IGTB839	IGTB839	TRUE	0.688497	IFN	2011-11-22	08:13:00	M	22	Caucasian
1559V111511_IFN	IFNB1	13	28436254	97.63	34518650	31242118	90.51	370	29126495	93.23	28123231	2136260951	2093808477	76	49.97	1254886986	24705614	37178	127873437	80699281	0.27	0.14	0.61	0.47	56.72	99.85	5.78	3.65	88.38	2.19	82.35	31.66	2212272222	2374400968	48431152	700417454	2	Genotype mismatched	1559V111511	IGTB1559	IGTB1559	TRUE	0.693039	IFN	2011-11-15	08:46:00	M	20	East Asian
1684V021612_IFN	IFNB1	13	31204820	97.55	37895652	34285206	90.47	397	31987558	93.3	30921861	2348958300	2300648779	76	49.97	1365343644	26992799	43287	147950821	95547589	0.27	0.14	0.6	0.47	56.19	99.84	6.09	3.93	87.88	2.1	81.94	31.68	2429658346	2605675656	51082792	769770848	2	Mismatched ethnicity	1684V021612	IGTB1684	IGTB1684	TRUE	0.905467	IFN	2012-02-16	08:01:00	F	56	Caucasian
1684V021612_FLU	Flu	13	29168192	96.97	42407330	37185732	87.69	27	30079201	80.89	29077957	2209053978	2162806227	76	49.96	1241322105	25084196	43901	148666485	99040341	0.25	0.13	0.6	0.48	54.33	99.83	6.51	4.33	86.97	2.19	70.32	32.65	2284853808	2826115632	49931392	745922227	5	Mismatched ethnicity	1684V021612	IGTB1684	IGTB1684	TRUE	0.90715	FLU	2012-02-16	08:01:00	F	56	Caucasian
1314V110911_baseline	Baseline	13	51368870	97.6	62616952	56079590	89.56	1217	52631070	93.85	50505051	3836711395	3763425816	76	49.98	2127829970	42431603	94395	334105263	203318277	0.26	0.11	0.51	0.47	53.22	99.78	8.36	5.09	83.99	2.57	78.78	30.77	3997853060	4262048840	102729656	1229937785	6	Mismatched ethnicity	1314V110911	IGTB1314	IGTB1314	TRUE	0.957208	baseline	2011-11-09	08:15:00	M	28	Caucasian
1314V110911_IFN	IFNB1	13	33347474	97.5	40673978	36870352	90.65	454	34202896	92.77	32812787	2492631614	2440172456	76	49.97	1424262001	28248471	45554	178607508	108116799	0.27	0.14	0.58	0.47	54.82	99.84	6.87	4.16	86.07	2.9	79.79	31.24	2597978902	2802146752	75340928	811705287	2	Mismatched ethnicity	1314V110911	IGTB1314	IGTB1314	TRUE	0.960825	IFN	2011-11-09	08:15:00	M	28	Caucasian
1314V110911_FLU	Flu	13	31472880	97.13	44058254	38530270	87.45	29	32402878	84.1	31058656	2359292076	2309946015	76	49.96	1296188208	26205635	54444	174285833	130599456	0.25	0.13	0.61	0.48	52.67	99.79	7.08	5.31	84.53	3.09	71.04	31.86	2461140832	2928300520	76027968	784099712	5	Mismatched ethnicity	1314V110911	IGTB1314	IGTB1314	TRUE	0.965677	FLU	2011-11-09	08:15:00	M	28	Caucasian
1419V110111_IFN	IFNB1	13	47808932	97.52	57990940	52658806	90.81	642	49025611	93.1	46953948	3567173261	3492680231	76	49.96	2072845821	41046716	59085	231962994	126114933	0.27	0.13	0.57	0.47	55.66	99.86	6.23	3.39	87.22	3.16	81.17	31.57	3724211223	4002069256	117770512	1175580189	2		1419V110111	IGTB1419	IGTB1419	TRUE	0.716088	IFN	2011-11-01	08:03:00	F	31	Caucasian
1170V042011_FLU	Flu	13	13549682	97.49	19678912	17359800	88.22	82	13897869	80.06	13356064	1014621124	996567043	76	49.96	543291072	11317050	22693	84607326	48108924	0.26	0.14	0.6	0.47	51.47	99.8	8.01	4.56	84.9	2.53	67.93	33.44	1055641637	1319344800	26689680	352961877	3		1170V042011	IGTB1170	IGTB1170	TRUE	0.722822	FLU	2011-04-20	07:49:00	M	24	African-American
1105V111511_IFN	IFNB1	13	61253434	97.49	75199448	67569362	89.85	774	62831158	92.99	60515999	4597202581	4503442942	76	49.97	2659409802	52760857	94672	259266240	225970983	0.27	0.15	0.63	0.46	55.72	99.82	5.43	4.73	87.4	2.43	81.23	31.68	4772630032	5135271512	116006552	1512050293	2		1105V111511	IGTB1105	IGTB1105	TRUE	0.725358	IFN	2011-11-15	08:30:00	M	36	African-American
1660V012412_baseline	Baseline	13	26485180	97.33	32225816	29070968	90.21	606	27211321	93.6	26019421	1976539407	1936245882	76	49.98	1120155599	22252281	44368	153103799	96550748	0.26	0.13	0.58	0.47	54.19	99.8	7.41	4.67	85.12	2.8	79.63	30.93	2066911777	2209393568	57932064	639212792	6		1660V012412	IGTB1660	IGTB1660	TRUE	0.726029	baseline	2012-01-24	08:02:00	F	48	African-American
1660V012412_IFN	IFNB1	13	42697810	97.46	51579754	47015010	91.15	602	43808384	93.18	42145636	3201277643	3138112323	76	49.97	1862828030	36815829	56427	196411592	127185378	0.26	0.13	0.57	0.48	55.99	99.85	5.9	3.82	87.64	2.64	81.61	31.65	3327257264	3573140760	87762368	1053152138	2		1660V012412	IGTB1660	IGTB1660	TRUE	0.729541	IFN	2012-01-24	08:02:00	F	48	African-American
1419V110111_baseline	Baseline	13	38532266	97.22	47424930	42587938	89.8	858	39633032	93.06	37704496	2864270577	2801813856	76	49.96	1635802991	32590528	56756	222001543	103159545	0.26	0.12	0.53	0.47	54.34	99.83	7.37	3.43	85.63	3.57	79.65	31.3	3010511208	3236683288	107406392	942215327	6		1419V110111	IGTB1419	IGTB1419	TRUE	0.729643	baseline	2011-11-01	08:03:00	F	31	Caucasian
1660V012412_FLU	Flu	13	39724218	97.01	55727412	48220338	86.53	60	40946895	84.92	39371639	2991008035	2927071783	76	49.95	1679364790	33730882	60139	211533881	142250151	0.26	0.15	0.64	0.47	53.99	99.82	6.8	4.57	86.1	2.53	73.08	32.11	3110361514	3664745688	78609536	998652953	5		1660V012412	IGTB1660	IGTB1660	TRUE	0.732031	FLU	2012-01-24	08:02:00	F	48	African-American
1419V110111_FLU	Flu	13	41374342	96.95	59370906	51983344	87.56	66	42675869	82.1	41165731	3127297553	3061142088	76	49.95	1748516666	35410229	64473	213042809	140965034	0.24	0.13	0.61	0.47	53.94	99.82	6.57	4.35	86.62	2.46	71.08	32.68	3241658051	3950734144	79683568	1059502404	5		1419V110111	IGTB1419	IGTB1419	TRUE	0.736444	FLU	2011-11-01	08:03:00	F	31	Caucasian
1272V110111_baseline	Baseline	13	46061914	97.33	56680614	50650538	89.36	1143	47323967	93.43	45342109	3444311474	3375546401	76	49.98	1947254923	38849139	83639	252713640	171998907	0.26	0.12	0.52	0.47	54.17	99.79	7.03	4.79	85.41	2.78	79.75	31.23	3594544449	3849440888	99919936	1122732561	6		1272V110111	IGTB1272	IGTB1688	FALSE	0.736779	baseline	2012-02-15	08:07:00	F	35	East Asian
1331V012412_IFN	IFNB1	13	40713608	97.65	49139866	44400364	90.36	605	41692960	93.9	40150547	3049975706	2987689637	76	49.98	1800305117	35136164	58811	174275955	135611302	0.26	0.14	0.64	0.48	56.85	99.83	5.5	4.28	87.89	2.33	82.48	31.04	3166837279	3374427664	73822904	982877361	2		1331V012412	IGTB1331	IGTB1331	TRUE	0.744759	IFN	2012-01-24	08:52:00	F	24	Caucasian
1478V020812_FLU	Flu	13	44587058	97.06	62607526	55097656	88	85	45935775	83.37	44362720	3369991213	3294581258	76	49.97	1898647308	37999018	70599	240251564	160064215	0.25	0.14	0.61	0.47	54.42	99.81	6.89	4.59	86.25	2.28	71.87	31.83	3489081769	4187421856	79485512	1110689346	5		1478V020812	IGTB1478	IGTB1478	TRUE	0.748252	FLU	2012-02-08	08:41:00	F	24	Caucasian
1411V110311_FLU	Flu	13	31140354	97.23	42939208	37273896	86.81	43	32027635	85.93	30869474	2345104856	2297477550	76	49.96	1313046322	26478994	47288	149551566	108472489	0.24	0.13	0.64	0.47	53.97	99.82	6.15	4.46	86.66	2.74	74.42	32.68	2432839063	2832816096	66679360	795133767	5		1411V110311	IGTB1411	IGTB1411	TRUE	0.748373	FLU	2011-11-03	08:37:00	F	29	Caucasian
1411V110311_IFN	IFNB1	13	28295176	97.54	34448430	31155220	90.44	375	29007433	93.11	27826662	2113840055	2069443186	76	49.97	1231099503	24437896	34044	124922563	77852213	0.26	0.12	0.57	0.47	55.87	99.86	5.67	3.53	87.72	3.08	81.63	31.84	2203340765	2367796720	67874080	701643484	2		1411V110311	IGTB1411	IGTB1411	TRUE	0.7564	IFN	2011-11-03	08:37:00	F	29	Caucasian
1170V042011_baseline	Baseline	13	50262142	97.79	60680672	54396600	89.64	1176	51395586	94.48	49300789	3745379172	3676593293	76	49.99	2099694167	42408441	77688	290788164	167183968	0.26	0.1	0.45	0.48	53.78	99.82	7.45	4.28	85.77	2.5	81	31.99	3904226340	4134141600	97775368	1248844786	6		1170V042011	IGTB1170	IGTB1170	TRUE	0.756743	baseline	2011-04-20	07:49:00	M	24	African-American
1170V042011_IFN	IFNB1	13	31786864	96.46	47104350	40715208	86.44	15	32954597	80.94	31894534	2423065371	2364493321	76	49.95	1383033481	27945923	42192	139591976	93630961	0.27	0.12	0.48	0.47	55.25	99.85	5.58	3.74	88.74	1.95	71.79	33.49	2503398087	3094355808	48784248	838386448	1		1170V042011	IGTB1170	IGTB1170	TRUE	0.760385	IFN	2011-04-20	07:49:00	M	24	African-American
1411V110311_baseline	Baseline	13	33765352	97.11	42027130	37439074	89.08	795	34769237	92.87	33158647	2518825134	2461377281	76	49.97	1422772384	28525306	50834	195766301	105278513	0.26	0.11	0.52	0.47	53.87	99.82	7.41	3.99	85.3	3.3	79.18	31.43	2640949323	2845369624	87143120	830058404	6		1411V110311	IGTB1411	IGTB1411	TRUE	0.761099	baseline	2011-11-03	08:37:00	F	29	Caucasian
1331V012412_baseline	Baseline	13	50042092	97.37	62129472	54861232	88.3	1194	51393178	93.68	49280625	3743761658	3670170105	76	49.98	2139747750	42138123	93894	262400169	209427721	0.26	0.14	0.61	0.47	54.81	99.78	6.72	5.36	85.44	2.47	80	30.63	3903917550	4169453632	96504648	1195897272	6		1331V012412	IGTB1331	IGTB1331	TRUE	0.763938	baseline	2012-01-24	08:52:00	F	24	Caucasian
0719V110211_IFN	IFNB1	13	40899880	97.62	49804466	45037106	90.43	538	41895958	93.03	40126261	3048330526	2988573100	76	49.97	1758209780	34818085	52087	201196121	119754585	0.27	0.14	0.6	0.46	55.25	99.85	6.32	3.76	86.67	3.24	80.59	31.43	3182511934	3422820056	103262264	1000154992	2		0719V110211	IGTB719	IGTB719	TRUE	0.785938	IFN	2011-11-02	08:32:00	F	45	Caucasian
1478V020812_IFN	IFNB1	13	42372570	97.67	50715246	46380210	91.45	630	43382894	93.54	41941497	3186046829	3125140095	76	49.98	1830685255	36008172	63110	223382602	151933979	0.26	0.15	0.61	0.47	55.56	99.83	6.78	4.61	86.46	2.15	80.83	30.91	3295232960	3524895960	70781840	1018498504	2		1478V020812	IGTB1478	IGTB1478	TRUE	0.787715	IFN	2012-02-08	08:41:00	F	24	Caucasian
1458V092711_FLU	Flu	13	42675360	97.04	59778710	52091488	87.14	65	43978254	84.43	42506515	3228748220	3160930254	76	49.96	1850733287	37026019	61735	209136148	127246903	0.24	0.15	0.74	0.47	55.41	99.83	6.26	3.81	87.9	2.03	74.16	32.49	3340143197	3958953088	67753088	1085332180	5		1458V092711	IGTB1458	IGTB1458	TRUE	0.789481	FLU	2011-09-27	07:59:00	M	21	Caucasian
1458V092711_IFN	IFNB1	13	50293544	97.76	60362372	54795892	90.78	670	51445663	93.89	49382152	3751650230	3676246310	76	49.98	2167270050	43067352	70084	229096312	160436388	0.27	0.13	0.59	0.47	55.46	99.84	5.86	4.11	87.22	2.82	81.85	31.76	3908048407	4164487792	110074144	1241229943	2		1458V092711	IGTB1458	IGTB1458	TRUE	0.794521	IFN	2011-09-27	07:59:00	M	21	Caucasian
1436V110311_IFN	IFNB1	13	42975354	97.5	52713264	47430616	89.98	490	44079263	92.93	42237332	3208505258	3137798103	76	49.97	1884997403	37157686	52911	188079642	122997561	0.26	0.15	0.63	0.47	56.3	99.86	5.62	3.67	87.71	3	81.47	31.41	3348125515	3604726816	100504072	1051616724	2		1436V110311	IGTB1436	IGTB1436	TRUE	0.796143	IFN	2011-11-03	08:58:00	F	22	Caucasian
1436V110311_FLU	Flu	13	31337118	97.07	44031618	38361908	87.12	53	32284556	84.16	31223385	2371945542	2321953000	76	49.96	1337487243	26844428	49090	147834212	114469902	0.24	0.13	0.66	0.47	54.54	99.82	6.03	4.67	87.13	2.17	73.29	32.59	2452321132	2915505008	53313696	799251303	5		1436V110311	IGTB1436	IGTB1436	TRUE	0.799732	FLU	2011-11-03	08:58:00	F	22	Caucasian
1131V102711_baseline	Baseline	13	40251342	97.7	48377294	43797670	90.53	961	41199278	94.07	39108637	2970946817	2917015942	76	49.98	1674587283	33443917	59825	240890336	122520025	0.27	0.11	0.49	0.48	53.51	99.82	7.7	3.92	84.52	3.87	79.47	31.01	3129514853	3328622920	121064656	970534466	6		1131V102711	IGTB1131	IGTB1131	TRUE	0.801396	baseline	2011-10-27	07:59:00	M	34	African-American
1131V102711_IFN	IFNB1	13	36685610	97.53	44536016	40412042	90.74	527	37614857	93.08	35836468	2722561347	2665306156	76	49.96	1571820819	31181857	45668	180553231	107122644	0.27	0.15	0.62	0.47	55.01	99.85	6.32	3.75	86.31	3.62	80.3	31.3	2857431882	3071315192	103501208	894489855	2		1131V102711	IGTB1131	IGTB1131	TRUE	0.80344	IFN	2011-10-27	07:59:00	M	34	African-American
1131V102711_FLU	Flu	13	33281780	97.11	45956404	40348174	87.8	43	34272898	84.94	32927765	2501489412	2447646264	76	49.96	1380143738	28036746	50064	171256338	119788614	0.26	0.12	0.53	0.49	53.01	99.82	6.58	4.6	85.79	3.03	72.84	32.78	2603459714	3066461224	78912168	853406751	5		1131V102711	IGTB1131	IGTB1131	TRUE	0.804835	FLU	2011-10-27	07:59:00	M	34	African-American
1436V110311_baseline	Baseline	13	40033802	97.41	50250804	44766070	89.09	1000	41097047	91.8	39253887	2981970594	2925754149	76	49.98	1682312341	33798169	62532	225278135	132260434	0.27	0.12	0.51	0.47	53.89	99.82	7.22	4.24	85.55	3	78.5	31.66	3121738511	3402221320	93618624	988334633	6		1436V110311	IGTB1436	IGTB1436	TRUE	0.804897	baseline	2011-11-03	08:58:00	F	22	Caucasian
0719V110211_FLU	Flu	13	27503870	96.88	38998152	34562244	88.63	38	28390267	82.14	27372267	2079378335	2034455814	76	49.95	1141044865	23241486	44234	148505273	102178044	0.25	0.14	0.67	0.47	52.91	99.81	6.89	4.74	85.72	2.66	70.37	32.8	2156453788	2626730544	57403712	707360774	5		0719V110211	IGTB719	IGTB719	TRUE	0.81723	FLU	2011-11-02	08:32:00	F	45	Caucasian
0980V111611_FLU	Flu	13	42662802	96.75	59585568	52360156	87.87	41	44098026	84.22	42532274	3231180384	3157215991	76	49.94	1801815797	36344173	66592	212048543	153180937	0.25	0.12	0.58	0.47	53.79	99.82	6.33	4.57	86.52	2.58	72.83	32.73	3349770388	3979371856	86312896	1096464879	5		0980V111611	IGTB980	IGTB980	TRUE	0.822538	FLU	2011-11-16	07:59:00	F	20	Caucasian
1605V021412_baseline	Baseline	13	53610300	97.55	65693866	58851380	89.58	1324	54954536	93.38	52699057	4003514127	3926237631	76	49.98	2258715236	45176273	101192	288427901	204345425	0.27	0.12	0.5	0.46	54.11	99.78	6.91	4.9	85.59	2.61	79.88	31.48	4174508207	4472704880	108969712	1314115509	6		1605V021412	IGTB1605	IGTB1605	TRUE	0.824499	baseline	2012-02-14	07:43:00	M	47	African-American
0980V111611_IFN	IFNB1	13	38350416	97.59	46625048	42117276	90.33	509	39297286	93.3	37718407	2865361840	2806276539	76	49.96	1658478824	32848893	49183	181677393	117281921	0.27	0.14	0.62	0.47	55.56	99.85	6.09	3.93	87.16	2.83	81.28	31.6	2985015508	3200912976	84498320	943134523	2		0980V111611	IGTB980	IGTB980	TRUE	0.824799	IFN	2011-11-16	07:59:00	F	20	Caucasian
1586V112211_IFN	IFNB1	13	41625632	98.06	50292454	44557080	88.6	180	42450395	95.27	40812669	3100364289	3047052657	76	49.98	1787953258	35496083	64074	198749903	124878711	0.27	0.11	0.5	0.48	55.45	99.82	6.16	3.87	87.08	2.88	82.92	31.63	3224452724	3386338080	93020808	1019914116	3		1586V112211	IGTB1586	IGTB1586	TRUE	0.826287	IFN	2011-11-22	07:58:00	M	25	Caucasian
1538V110211_baseline	Baseline	13	40092140	97.54	48448404	43774626	90.35	921	41102524	93.9	39286673	2984360413	2919061248	76	49.99	1669147638	33460520	71434	249835774	134234429	0.26	0.11	0.52	0.47	53.46	99.79	8	4.3	84.67	3.03	79.45	31.2	3122051834	3326871576	94740840	974164126	6		1538V110211	IGTB1538	IGTB1538	TRUE	0.829116	baseline	2011-11-02	08:08:00	M	23	Caucasian
1538V110211_IFN	IFNB1	13	34731026	97.72	42044832	37942816	90.24	452	35542109	93.67	34040878	2586063871	2531861435	76	49.97	1491182392	29670860	43487	169340716	98742288	0.27	0.15	0.67	0.46	55.23	99.85	6.27	3.66	86.92	3.15	81.38	31.69	2699886248	2883654016	85130032	855542208	2		1538V110211	IGTB1538	IGTB1538	TRUE	0.829231	IFN	2011-11-02	08:08:00	M	23	Caucasian
1538V110211_FLU	Flu	13	24667308	97.13	36415386	31862624	87.5	29	25395237	79.7	24485656	1860153380	1818031507	76	49.96	1005645077	20599982	46900	143852215	100876895	0.24	0.14	0.65	0.47	52.13	99.77	7.46	5.23	84.6	2.71	67.39	32.47	1929055114	2421559424	52350928	626361808	5		1538V110211	IGTB1538	IGTB1538	TRUE	0.830548	FLU	2011-11-02	08:08:00	M	23	Caucasian
1574V112911_FLU	Flu	13	31533436	95.11	52661798	42629912	80.95	2442	33155128	77.77	31988797	2429873426	2351783952	76	49.91	1341897263	27661889	47260	174582261	100780899	0.26	0.11	0.53	0.48	53.29	99.83	6.93	4	86.97	2.09	67.6	33.68	2518198839	3239873312	52741416	848240170	4		1574V112911	IGTB1574	IGTB1574	TRUE	0.830563	FLU	2011-11-29	08:14:00	M	26	African-American
1605V021412_IFN	IFNB1	13	37919548	97.62	45734348	41704290	91.19	531	38842969	93.14	37347983	2837364436	2779257860	76	49.98	1658281728	32801592	50925	169125018	112269649	0.27	0.15	0.68	0.46	56.2	99.85	5.73	3.8	87.9	2.56	81.83	31.7	2950671246	3169526040	75557680	935482320	2		1605V021412	IGTB1605	IGTB1605	TRUE	0.83578	IFN	2012-02-14	07:43:00	M	47	African-American
0559V072011_FLU	Flu	13	28760850	95.25	46433612	38760476	83.48	2074	30193587	77.9	29116219	2211829736	2140780271	76	49.91	1215677052	24930401	42442	162192371	94488009	0.26	0.12	0.59	0.48	53.01	99.83	7.07	4.12	86.42	2.39	67.28	33.42	2293412743	2945796176	54716656	766373461	4		0559V072011	IGTB559	IGTB559	TRUE	0.840605	FLU	2011-07-20	07:51:00	F	36	Caucasian
1605V021412_FLU	Flu	13	34366814	96.93	52754450	45737846	86.7	90	35456023	77.52	34224235	2599938873	2545340318	76	49.95	1444745946	29481879	53352	174786116	125352304	0.24	0.11	0.52	0.49	53.64	99.82	6.49	4.65	86.61	2.25	67.1	32.96	2693176500	3476076296	60552088	887788131	5		1605V021412	IGTB1605	IGTB1605	TRUE	0.842152	FLU	2012-02-14	07:43:00	M	47	African-American
1282V110811_FLU	Flu	13	46371182	96.96	66681520	58287374	87.41	64	47826956	82.05	46085404	3501003644	3425846394	76	49.96	1907103075	38879267	79047	256286445	187988469	0.24	0.11	0.53	0.49	52.5	99.8	7.05	5.17	84.89	2.88	69.62	32.4	3632824932	4429840424	104611112	1176907611	5		1282V110811	IGTB1282	IGTB1282	TRUE	0.845074	FLU	2011-11-08	08:24:00	F	20	Caucasian
0559V072011_baseline	Baseline	13	32329612	97.71	38942784	35012828	89.91	702	33088694	94.5	31632748	2402767651	2357336530	76	49.99	1347534174	26923165	49713	212252752	92107738	0.26	0.1	0.44	0.48	53.62	99.82	8.45	3.67	84.84	3.05	80.13	31.22	2513120929	2660974928	76636576	784658580	6		0559V072011	IGTB559	IGTB559	TRUE	0.847263	baseline	2011-07-20	07:51:00	F	36	Caucasian
0559V072011_IFN	IFNB1	13	38567792	97.86	46451116	41873878	90.15	496	39410707	94.12	37643040	2859532887	2802338105	76	49.98	1642471239	32260645	51070	213509705	121477685	0.26	0.13	0.58	0.48	54.87	99.84	7.13	4.06	85.25	3.56	80.19	30.38	2993545124	3182414728	106700808	909461723	2		0559V072011	IGTB559	IGTB559	TRUE	0.848176	IFN	2011-07-20	07:51:00	F	36	Caucasian
1282V110811_IFN	IFNB1	13	37700302	97.68	45345212	41177638	90.81	488	38594604	93.73	37109871	2818946586	2760653786	76	49.98	1626146205	32052315	54667	192683431	122706811	0.27	0.14	0.62	0.47	55.47	99.83	6.57	4.19	86.55	2.7	81.07	31.07	2931430412	3129500488	79075568	910879849	2		1282V110811	IGTB1282	IGTB1282	TRUE	0.853228	IFN	2011-11-08	08:24:00	F	20	Caucasian
1282V110811_baseline	Baseline	13	41899930	97.42	51759268	46031364	88.93	958	43011426	93.44	41114239	3123302796	3059788574	76	49.98	1746045518	34776046	73890	266409517	150788198	0.26	0.12	0.5	0.47	53.44	99.79	8.15	4.62	84.22	3.01	78.65	30.78	3267117637	3498383664	98440672	1005497646	6		1282V110811	IGTB1282	IGTB1282	TRUE	0.855535	baseline	2011-11-08	08:24:00	F	20	Caucasian
0312V011012_IFN	IFNB1	13	54091102	97.73	65118064	59041436	90.67	689	55349559	93.75	53346525	4052844649	3970866945	76	49.99	2363816630	46480098	74596	246708294	177402090	0.26	0.15	0.61	0.46	56.22	99.84	5.87	4.22	87.52	2.4	82.01	31.3	4204649990	4487149136	100818712	1315960898	2		0312V011012	IGTB312	IGTB1350	FALSE	0.864327	IFN	2012-01-10	08:39:00	F	25	East Asian
1237V021512_FLU	Flu	13	42641200	97.06	60411336	53295872	88.22	40	43932320	82.43	42536983	3231518226	3164504124	76	49.96	1775827775	36248777	72438	232586341	167032446	0.26	0.13	0.58	0.47	53.21	99.8	6.97	5.01	86.24	1.79	71.05	33.03	3337187926	4050486272	59621696	1102151549	5		1237V021512	IGTB1237	IGTB1237	TRUE	0.864413	FLU	2012-02-15	08:41:00	F	19	African-American
1654V022112_FLU	Flu	13	41113112	97.24	59839476	52397714	87.56	45	42277930	80.69	40728112	3094255318	3031239217	76	49.96	1673086807	34722886	63637	225082974	150793385	0.25	0.12	0.59	0.48	52.09	99.82	7.01	4.7	85.65	2.64	69.08	33.56	3211644814	3982226264	84882120	1077845639	5		1654V022112	IGTB1654	IGTB1654	TRUE	0.865058	FLU	2012-02-21	08:38:00	F	50	African-American
0880V110811_baseline	Baseline	13	34545798	97.69	41725898	37588096	90.08	724	35361325	94.08	33825403	2569548108	2520886072	76	49.98	1430138277	28581252	56515	216372426	128602133	0.26	0.11	0.52	0.47	53.24	99.8	8.06	4.79	84.1	3.06	79.08	30.86	2686027547	2856695296	82148552	828826608	6		0880V110811	IGTB880	IGTB880	TRUE	0.866232	baseline	2011-11-08	07:46:00	M	25	Caucasian
0880V110811_IFN	IFNB1	13	34035330	97.66	40976286	37271560	90.96	504	34852416	93.51	33413394	2538325679	2486058584	76	49.97	1453445849	28854040	46434	172605479	114338154	0.27	0.15	0.62	0.46	54.9	99.84	6.52	4.32	86.09	3.07	80.46	31.19	2647436013	2832638560	81373048	825726390	2		0880V110811	IGTB880	IGTB880	TRUE	0.866345	IFN	2011-11-08	07:46:00	M	25	Caucasian
1112V110911_FLU	Flu	13	33211154	97.15	46441598	40832526	87.92	44	34185076	83.72	32997365	2506664951	2454792034	76	49.97	1387644555	28094066	52923	174953309	123931593	0.24	0.12	0.55	0.48	53.44	99.81	6.74	4.77	85.95	2.54	71.92	32.51	2596636107	3103271976	65924680	844229907	5		1112V110911	IGTB1112	IGTB1112	TRUE	0.868483	FLU	2011-07-20	08:00:00	F	30	East Asian
1589V020812_FLU	Flu	13	35275568	96.87	50318456	43557506	86.56	118	36414755	83.6	35159503	2670955951	2613711389	76	49.96	1473020346	29788618	53842	197810928	132239923	0.24	0.13	0.62	0.47	53.26	99.82	7.15	4.78	85.55	2.52	71.48	32.3	2765961214	3310370456	69632264	893309429	5		1589V020812	IGTB1589	IGTB1589	TRUE	0.871793	FLU	2012-02-08	08:21:00	F	40	Caucasian
1237V021512_baseline	Baseline	13	49862818	97.15	62350156	55265916	88.64	1089	51323502	92.87	48996059	3722183249	3638293084	76	49.97	2094081233	41797983	85618	291208273	186084212	0.26	0.13	0.57	0.47	53.71	99.8	7.47	4.77	84.79	2.97	78.7	31.08	3898698384	4200209616	115737056	1211654308	6		1237V021512	IGTB1237	IGTB1237	TRUE	0.87559	baseline	2012-02-15	08:41:00	F	19	African-American
1237V021512_IFN	IFNB1	13	29261564	97.38	35749258	32434080	90.73	391	30050228	92.65	28759188	2184830102	2138002297	76	49.97	1263412141	24987413	36621	138205675	92941672	0.27	0.15	0.66	0.46	55.35	99.85	6.05	4.07	86.75	3.12	80.34	31.41	2282720738	2464990080	71287848	716919110	2		1237V021512	IGTB1237	IGTB1237	TRUE	0.878469	IFN	2012-02-15	08:41:00	F	19	African-American
0880V110811_FLU	Flu	13	33026224	97.2	47105418	41646036	88.41	47	33976404	81.58	32795018	2491367917	2440035379	76	49.96	1333342579	27416352	62192	182332125	154384117	0.25	0.12	0.53	0.48	51.66	99.77	7.06	5.98	84.3	2.66	68.74	32.63	2580883361	3165098736	68657032	842217175	5		0880V110811	IGTB880	IGTB880	TRUE	0.878972	FLU	2011-11-08	07:46:00	M	25	Caucasian
1474V020912_IFN	IFNB1	13	45813928	97.69	55475578	49994724	90.12	521	46898883	93.81	45503625	3456945966	3385117241	76	49.97	1976815847	39354348	71710	211089031	146272982	0.26	0.12	0.55	0.48	55.49	99.82	5.93	4.11	88.01	1.96	82.52	32.52	3562665300	3799599024	69782136	1158744769	2		1474V020912	IGTB1474	IGTB1474	TRUE	0.882132	IFN	2012-02-09	08:49:00	F	24	Caucasian
1359V020712_FLU	Flu	13	38337668	97.09	55038296	48662168	88.42	66	39486851	81.14	38239313	2905152089	2845968185	76	49.96	1579429354	32291840	65285	204869871	163828982	0.25	0.12	0.54	0.48	52.66	99.8	6.83	5.46	85.58	2.13	69.41	32.93	2999560051	3698324768	63838176	987629006	5		1359V020712	IGTB1359	IGTB1359	TRUE	0.882542	FLU	2012-02-07	08:40:00	M	19	Caucasian
1589V020812_IFN	IFNB1	13	38612634	97.63	46658478	42350560	90.77	503	39550426	93.39	37999467	2886691767	2827479581	76	49.97	1655626459	32811126	53699	192864326	118601776	0.26	0.15	0.65	0.46	55.11	99.84	6.42	3.95	86.81	2.82	81.03	31.7	3004230408	3218642560	84866616	952325555	2		1589V020812	IGTB1589	IGTB1589	TRUE	0.88416	IFN	2012-02-08	08:21:00	F	40	Caucasian
1359V020712_IFN	IFNB1	13	39935322	97.6	48299166	43825166	90.74	530	40918989	93.37	39469572	2998509360	2935680747	76	49.97	1743518459	34490058	54705	181077939	125289026	0.27	0.16	0.68	0.46	56.09	99.84	5.83	4.03	87.83	2.31	81.97	31.74	3108313656	3330712616	71901776	986568675	2		1359V020712	IGTB1359	IGTB1359	TRUE	0.884743	IFN	2012-02-07	08:40:00	M	19	Caucasian
1384V072111_FLU	Flu	13	38164548	95.21	60958468	50424878	82.72	2766	40083757	79.49	38890717	2954423710	2861338536	76	49.9	1599487421	33095778	59444	219416925	146432120	0.26	0.1	0.47	0.48	52.53	99.82	7.21	4.81	86.26	1.72	68.53	33.73	3044652036	3832290728	52497152	1026852920	4		1384V072111	IGTB1384	IGTB1384	TRUE	0.885858	FLU	2011-07-21	07:59:00	M	20	Caucasian
1654V022112_baseline	Baseline	13	41254506	97.47	50242024	45244544	90.05	944	42326624	93.55	40529156	3078901992	3022376397	76	49.99	1722957598	34522328	66464	247119186	152581612	0.26	0.11	0.52	0.47	53.59	99.81	7.69	4.75	84.81	2.76	79.3	31.23	3215187723	3438585344	88618736	1003969570	6		1654V022112	IGTB1654	IGTB1654	TRUE	0.889616	baseline	2012-02-21	08:38:00	F	50	African-American
1359V020712_baseline	Baseline	13	42320556	97.26	52200494	46730252	89.52	985	43515058	93.12	41775144	3173665142	3101044081	76	49.98	1783062673	35688620	72026	236722418	154903356	0.27	0.12	0.52	0.47	53.94	99.8	7.16	4.69	85.49	2.66	79.57	31.55	3305578785	3551499152	88037640	1042903088	6		1359V020712	IGTB1359	IGTB1359	TRUE	0.891151	baseline	2012-02-07	08:40:00	M	19	Caucasian
1112V110911_IFN	IFNB1	13	41391318	97.65	50045254	45463092	90.84	538	42388122	93.24	40705406	3092155415	3028420013	76	49.98	1784075588	35268229	59644	200452787	127620407	0.26	0.15	0.67	0.47	55.41	99.83	6.23	3.96	86.95	2.87	81.02	31.53	3219712875	3455194992	92321760	1015306112	2		1112V110911	IGTB1112	IGTB1112	TRUE	0.893559	IFN	2011-07-20	08:00:00	F	30	East Asian
1556V112311_IFN	IFNB1	13	44554930	97.89	54044326	47846770	88.53	193	45516033	95.13	44041656	3345703915	3287642187	76	49.97	1678923672	33819175	111920	334368360	369185911	0.27	0.13	0.49	0.46	48.56	99.67	9.67	10.68	77.29	2.37	73.48	28.72	3457399986	3636354520	81842880	993129473	3		1556V112311	IGTB1556	IGTB1556	TRUE	0.897337	IFN	2011-11-23	08:58:00	F	30	Caucasian
1136V081011_baseline	Baseline	13	52626372	97.43	65419302	57809536	88.37	1312	54014315	93.44	51467662	3909767341	3837397443	76	49.97	2196511505	44236983	85001	316257545	167472932	0.26	0.1	0.46	0.48	53.54	99.81	7.71	4.08	85.06	3.15	79.43	31.53	4102899984	4393524736	129297736	1293453232	6		1136V081011	IGTB1136	IGTB1136	TRUE	0.897622	baseline	2011-08-10	08:03:00	F	22	African-American
1384V072111_IFN	IFNB1	13	25585140	98.07	30900762	27468184	88.89	105	26087729	94.97	24974880	1897079123	1865491416	76	49.98	1087160177	21526972	34332	136246099	80994260	0.27	0.12	0.53	0.47	54.87	99.84	6.88	4.09	85.8	3.23	81.44	30.94	1981411925	2087581984	64092472	612970271	3		1384V072111	IGTB1384	IGTB1384	TRUE	0.89858	IFN	2011-07-21	07:59:00	M	20	Caucasian
1057V100411_baseline	Baseline	13	38547574	97.59	47332702	42052506	88.84	908	39499299	93.93	37926188	2881031797	2824800770	76	49.99	1606586699	31929800	70762	228271042	173226689	0.26	0.12	0.52	0.47	53.55	99.78	7.61	5.77	84.08	2.54	78.93	30.53	3000280642	3195990456	76283328	915970069	6		1057V100411	IGTB1057	IGTB1057	TRUE	0.901655	baseline	2011-10-04	08:17:00	F	47	African-American
1057V100411_IFN	IFNB1	13	40972130	96.3	62016388	52765486	85.08	23	42544261	80.63	41254199	3134227440	3054258063	76	49.96	1798390185	36121925	56194	191936542	119262831	0.29	0.11	0.47	0.48	55.64	99.84	5.94	3.69	88.67	1.7	71.46	33.03	3231960866	4010176936	55039656	1067362743	1		1057V100411	IGTB1057	IGTB1057	TRUE	0.902766	IFN	2011-10-04	08:17:00	F	47	African-American
1057V100411_FLU	Flu	13	36902962	97.04	52578272	46091186	87.66	45	38027119	82.5	36622358	2782045306	2727935790	76	49.97	1555013129	31792089	54671	187860927	118232523	0.25	0.14	0.62	0.47	53.84	99.83	6.5	4.09	87.04	2.37	71.77	33.2	2888391806	3502930136	68378416	958954613	5		1057V100411	IGTB1057	IGTB1057	TRUE	0.903322	FLU	2011-10-04	08:17:00	F	47	African-American
0481V110811_IFN	IFNB1	13	38359316	97.65	46478680	42270972	90.95	517	39281805	92.93	37658644	2860739147	2803132881	76	49.97	1649469894	32709449	51761	183164525	122472541	0.27	0.14	0.62	0.47	55.28	99.84	6.14	4.1	86.73	3.03	80.55	31.45	2983743983	3212593872	90449728	938249340	2		0481V110811	IGTB481	IGTB481	TRUE	0.903722	IFN	2011-11-08	08:07:00	M	26	Caucasian
0481V110811_baseline	Baseline	13	46646306	97.56	57752206	51186238	88.63	1090	47811331	93.41	45910300	3487623263	3424334863	76	49.98	1956996714	39103485	76528	277867296	167459338	0.27	0.12	0.52	0.47	53.89	99.8	7.65	4.61	85.28	2.46	79.62	31.4	3631727960	3890154088	89160920	1140302502	6		0481V110811	IGTB481	IGTB481	TRUE	0.905386	baseline	2011-11-08	08:07:00	M	26	Caucasian
1474V020912_FLU	Flu	13	44361900	97.26	63138100	55353088	87.67	47	45612788	82.4	44160542	3354817167	3285958828	76	49.95	1815336150	37466606	76989	239697029	165111028	0.24	0.13	0.66	0.47	52.39	99.79	6.92	4.77	85.91	2.41	70.76	33.52	3464817726	4206834688	83358624	1161366312	5		1474V020912	IGTB1474	IGTB1474	TRUE	0.907873	FLU	2012-02-09	08:49:00	F	24	Caucasian
0448V012512_FLU	Flu	13	36854268	97.09	51910068	45569972	87.79	43	37958508	83.3	36443033	2768394698	2711256011	76	49.96	1560719288	31498337	51360	186973668	113943303	0.24	0.14	0.66	0.47	54.13	99.84	6.49	3.95	86.62	2.94	72.11	32.49	2883191968	3463317872	84786512	936833135	5		0448V012512	IGTB448	IGTB448	TRUE	0.911662	FLU	2012-01-25	08:33:00	F	27	Caucasian
0195V011212_IFN	IFNB1	13	29997378	98.11	36099528	32205122	89.21	139	30575546	94.94	29260510	2221615076	2183165484	76	49.97	1282633536	25342415	49507	150156298	89690673	0.27	0.14	0.59	0.48	55.26	99.81	6.47	3.86	86.51	3.16	82.04	31.25	2321233985	2447589272	73436368	725426963	3		0195V011212	IGTB195	IGTB195	TRUE	0.915152	IFN	2012-01-12	07:48:00	F	28	Caucasian
1472V110311_FLU	Flu	13	33794456	97.16	48522748	43278546	89.19	34	34782412	80.37	33550064	2548921658	2497633487	76	49.95	1381063691	28236076	58270	187643387	142018198	0.25	0.13	0.59	0.47	52.27	99.79	7.1	5.37	84.81	2.72	68.13	32.54	2642300945	3289169496	71802672	859810363	5		1472V110311	IGTB1472	IGTB1472	TRUE	0.91691	FLU	2011-11-03	07:44:00	F	19	Caucasian
1472V110311_IFN	IFNB1	13	37064498	97.54	45149910	40915220	90.62	452	38001204	92.88	36578997	2778747352	2722672031	76	49.96	1611075670	31811743	47347	184643846	109789413	0.27	0.15	0.62	0.46	55.81	99.85	6.4	3.8	87.24	2.56	80.99	31.43	2886553011	3109556720	73801016	907291989	2		1472V110311	IGTB1472	IGTB1472	TRUE	0.920771	IFN	2011-11-03	07:44:00	F	19	Caucasian
1472V110311_baseline	Baseline	13	36014424	97.24	44782718	39749318	88.76	819	37035570	93.17	35374061	2687205059	2631816591	76	49.96	1501367192	30038102	58673	222570524	123940391	0.26	0.1	0.47	0.48	53.37	99.81	7.91	4.41	84.53	3.16	78.72	31.16	2813203149	3020948168	88777576	876610502	6		1472V110311	IGTB1472	IGTB1472	TRUE	0.921099	baseline	2011-11-03	07:44:00	F	19	Caucasian
0481V110811_FLU	Flu	13	42572298	96.76	61440832	53826180	87.61	45	43995604	81.74	42558965	3233066891	3163595522	76	49.95	1778932159	36277059	76629	218442201	168963011	0.25	0.14	0.63	0.47	53.23	99.79	6.54	5.06	86.17	2.24	70.39	32.93	3341786993	4090789680	74915024	1100586929	5		0481V110811	IGTB481	IGTB481	TRUE	0.923573	FLU	2011-11-08	08:07:00	M	26	Caucasian
0398V050311_IFN	IFNB1	13	40756066	97.9	48786392	43822356	89.83	188	41630588	95	40007809	3039385291	2982530366	76	49.99	1726277601	34090614	72272	211398650	173570758	0.26	0.14	0.61	0.48	54.59	99.79	6.68	5.49	85.35	2.47	81.04	30.77	3162311533	3330499056	78208560	972903917	3		0398V050311	IGTB398	IGTB398	TRUE	0.925908	IFN	2011-05-03	08:15:00	F	48	Caucasian
1266V111511_FLU	Flu	13	32092436	97.28	44472930	38909890	87.49	31	32990686	84.79	31864738	2420741177	2370369019	76	49.96	1349520828	27376855	46289	166308542	108684190	0.25	0.12	0.55	0.48	53.85	99.83	6.64	4.34	86.78	2.25	73.54	32.93	2506002271	2957151640	56314784	825210565	5		1266V111511	IGTB1266	IGTB1266	TRUE	0.936732	FLU	2011-11-15	07:44:00	F	30	Caucasian
0064V080311_IFN	IFNB1	13	34239422	97.7	41517858	37415858	90.12	425	35044441	93.66	33741255	2563353412	2510489865	76	49.98	1486246492	29543889	43714	163271894	97089531	0.27	0.14	0.62	0.46	55.83	99.85	6.13	3.65	87.68	2.54	82.08	31.85	2662123418	2843605208	67705208	847848914	2		0064V080311	IGTB64	IGTB64	TRUE	0.937914	IFN	2011-08-03	07:45:00	F	29	Caucasian
1266V111511_IFN	IFNB1	13	31180554	97.54	37930050	34211018	90.2	384	31967798	93.44	30772929	2337578111	2289075357	76	49.97	1358144388	26733346	43113	154902753	91860496	0.27	0.15	0.67	0.47	55.93	99.84	6.38	3.78	87.3	2.54	81.53	31.37	2428118453	2600037368	61554376	761704148	2		1266V111511	IGTB1266	IGTB1266	TRUE	0.940535	IFN	2011-11-15	07:44:00	F	30	Caucasian
0398V050311_FLU	Flu	13	37269082	95.69	57851156	47980922	82.94	2598	38946895	81.17	37405556	2841736101	2753055566	76	49.95	1564692874	32036801	59614	203214207	156197972	0.28	0.1	0.4	0.51	52.89	99.81	6.87	5.28	85.69	2.17	69.52	32.8	2958419656	3646550072	64093536	970258131	4		0398V050311	IGTB398	IGTB398	TRUE	0.942369	FLU	2011-05-03	08:15:00	F	48	Caucasian
1686V022212_FLU	Flu	13	34848896	97.23	48638112	42249884	86.87	44	35842198	84.83	34529269	2623106634	2567246961	76	49.96	1472284200	29942712	47808	168900797	108996316	0.26	0.11	0.54	0.48	54.08	99.84	6.2	4	87.28	2.51	74.01	33.21	2722608690	3210991184	68353032	904119976	5		1686V022212	IGTB1686	IGTB1686	TRUE	0.942473	FLU	2012-02-22	07:50:00	M	50	African-American
1683V020712_FLU	Flu	13	34701222	97.03	49018318	43170680	88.07	82	35764061	82.84	34495799	2620643168	2565705893	76	49.96	1446526878	29602358	53415	186498586	125406031	0.26	0.13	0.61	0.47	53.25	99.82	6.86	4.62	86.39	2.13	71.53	33.14	2716686185	3280971680	57938144	900351747	5		1683V020712	IGTB1683	IGTB1683	TRUE	0.942923	FLU	2012-02-07	08:04:00	F	31	African-American
1683V020712_baseline	Baseline	13	46266112	97.37	56563074	50639328	89.53	1077	47516187	93.83	45694187	3471109649	3392244822	76	49.98	1962100058	39303937	78773	268535980	152311522	0.26	0.12	0.51	0.47	54.36	99.8	7.44	4.22	86.05	2.29	80.7	31.69	3609205172	3848588928	82574912	1143745050	6		1683V020712	IGTB1683	IGTB1683	TRUE	0.94393	baseline	2012-02-07	08:04:00	F	31	African-American
1268V102711_IFN	IFNB1	13	38563496	97.69	46751172	42372234	90.63	489	39474481	93.16	37866492	2876500205	2820017793	76	49.97	1687431249	33325342	46131	172314269	102152824	0.27	0.15	0.66	0.46	56.28	99.86	5.75	3.41	87.9	2.95	81.84	31.62	2998366573	3220289784	88419160	948111331	2		1268V102711	IGTB1268	IGTB1268	TRUE	0.94421	IFN	2011-10-27	08:13:00	F	20	Caucasian
1683V020712_IFN	IFNB1	13	36759078	97.7	44560512	40157514	90.12	498	37622985	93.69	36201618	2749989392	2694586286	76	49.97	1598294773	31652083	47224	168868925	112563544	0.26	0.14	0.6	0.47	55.93	99.85	5.91	3.94	87.56	2.59	81.99	31.63	2857677708	3051971064	74128728	903877511	2		1683V020712	IGTB1683	IGTB1683	TRUE	0.944481	IFN	2012-02-07	08:04:00	F	31	African-American
1686V022212_baseline	Baseline	13	47901668	97.58	59274982	52969804	89.36	1113	49091118	92.68	47058381	3574928728	3506855917	76	49.98	2014533231	40645640	80867	276791513	152377825	0.26	0.12	0.52	0.47	54.02	99.8	7.42	4.09	85.96	2.53	79.63	31.94	3729087486	4025705104	94490192	1190951312	6		1686V022212	IGTB1686	IGTB1686	TRUE	0.944853	baseline	2012-02-22	07:50:00	M	50	African-American
1266V111511_baseline	Baseline	13	42004048	97.38	52615814	46510806	88.4	983	43132850	92.74	41090660	3121533392	3061844077	76	49.98	1765127208	35222036	64755	251620045	127538597	0.26	0.12	0.49	0.48	53.87	99.82	7.68	3.89	85.02	3.41	78.81	31.15	3276399816	3534821256	111651144	1020533521	6		1266V111511	IGTB1266	IGTB1266	TRUE	0.946944	baseline	2011-11-15	07:44:00	F	30	Caucasian
1268V102711_FLU	Flu	13	43473796	97.36	60012662	52108344	86.83	67	44654745	85.7	42994938	3266215708	3198281614	76	49.97	1836020599	36954410	64257	205007476	149151388	0.24	0.12	0.57	0.47	54.13	99.83	6.04	4.4	86.6	2.96	74.17	32.47	3391958459	3960234144	100525656	1101322262	5		1268V102711	IGTB1268	IGTB1268	TRUE	0.94821	FLU	2011-10-27	08:13:00	F	20	Caucasian
1686V022212_IFN	IFNB1	13	33407116	97.57	40689372	36899244	90.69	465	34239958	92.79	32953432	2503442604	2451385491	76	49.98	1457358374	29006528	38967	154797754	89175173	0.26	0.14	0.65	0.47	56.03	99.87	5.95	3.43	88.13	2.49	81.74	32.1	2600972597	2804342544	64830128	834850547	2		1686V022212	IGTB1686	IGTB1686	TRUE	0.94873	IFN	2012-02-22	07:50:00	M	50	African-American
1272V110111_FLU	Flu	13	34933010	97.25	47533336	42147338	88.67	34	35919086	85.22	34645321	2632070838	2578028704	76	49.96	1469649486	29638491	55723	177400037	125944858	0.26	0.12	0.52	0.48	53.86	99.81	6.5	4.62	86.28	2.6	73.49	32.42	2728544338	3203197688	71057112	884534379	5		1272V110111	IGTB1272	IGTB1272	TRUE	0.948917	FLU	2011-11-01	08:13:00	F	21	Caucasian
0793V060911_FLU	Flu	13	35311138	97.16	48896050	43189826	88.33	41	36344654	84.15	35140246	2669621523	2610068679	76	49.96	1495780508	30312335	55716	168435610	124239786	0.26	0.13	0.59	0.47	54.18	99.82	6.1	4.5	86.99	2.41	73.17	32.81	2760865912	3282426776	66588160	905861133	5		0793V060911	IGTB793	IGTB793	TRUE	0.948964	FLU	2011-06-09	08:12:00	M	23	Caucasian
1452V063011_IFN	IFNB1	13	34227828	96.08	53409128	45498964	85.19	14	35624040	78.3	34543459	2624313458	2558711608	76	49.94	1504413166	29950053	49568	164244092	124598409	0.27	0.13	0.56	0.48	55.59	99.83	6.07	4.6	87.68	1.65	68.62	32.09	2706226422	3457921264	44533416	868460909	1		1452V063011	IGTB1452	IGTB1452	TRUE	0.950081	IFN	2011-06-30	08:02:00	M	46	African-American
1272V110111_IFN	IFNB1	13	39304952	97.45	48413374	43574684	90.01	490	40333233	92.56	38539946	2927559115	2864439869	76	49.97	1703912640	33574979	50693	192844945	113923539	0.27	0.15	0.64	0.46	55.62	99.85	6.3	3.72	86.72	3.27	80.22	31.1	3063475010	3311675984	100164504	952707776	2		1272V110111	IGTB1272	IGTB1272	TRUE	0.95148	IFN	2011-11-01	08:13:00	F	21	Caucasian
1452V063011_baseline	Baseline	13	42702344	97.81	52247942	46396934	88.8	1101	43657286	94.1	42003331	3191130863	3131941661	76	49.98	1714436766	35791550	66727	256937997	146232114	0.26	0.08	0.34	0.51	51.69	99.81	7.75	4.41	85.44	2.4	80.36	33.75	3316569158	3526166984	79661832	1119351717	6		1452V063011	IGTB1452	IGTB1452	TRUE	0.951817	baseline	2011-06-30	08:02:00	M	46	African-American
1437V110911_baseline	Baseline	13	65352260	97.42	81285678	72837036	89.61	1620	67085768	92.1	64306005	4885132914	4787158887	76	49.98	2702658229	54004698	118490	423900995	254395378	0.26	0.13	0.53	0.47	53.04	99.78	8.32	4.99	83.82	2.87	77.16	30.79	5095852297	5535614736	146204848	1568795664	6		1437V110911	IGTB1437	IGTB1437	TRUE	0.954287	baseline	2011-11-09	08:34:00	F	37	Caucasian
1452V063011_FLU	Flu	13	27113074	97.14	37981174	33236316	87.51	18	27912104	83.98	26891295	2042733448	1998708308	76	49.96	1144834732	23129336	41226	139779065	97225405	0.26	0.13	0.59	0.48	54	99.82	6.59	4.59	86.41	2.41	72.53	32.41	2120082492	2525960016	51108176	687175471	5		1452V063011	IGTB1452	IGTB1452	TRUE	0.955088	FLU	2011-06-30	08:02:00	M	46	African-American
1437V110911_IFN	IFNB1	13	40667668	97.48	49789848	45149532	90.68	597	41719269	92.4	39901075	3030816324	2969630052	76	49.97	1730286902	34203008	59903	215158100	140727345	0.26	0.15	0.65	0.46	54.61	99.83	6.79	4.44	85.47	3.3	78.92	30.86	3168611313	3431364432	104654128	977874701	2		1437V110911	IGTB1437	IGTB1437	TRUE	0.956286	IFN	2011-11-09	08:34:00	F	37	Caucasian
0865V080311_IFN	IFNB1	13	35564256	97.6	42980062	39065406	90.89	485	36439693	93.28	35386625	2688048815	2632665868	76	49.99	1592812590	31273918	52261	142268778	105426775	0.26	0.13	0.6	0.47	57.55	99.83	5.14	3.81	89.4	1.66	83.34	31.85	2767751890	2968970856	45841376	881440677	2		0865V080311	IGTB865	IGTB865	TRUE	0.957833	IFN	2011-08-03	08:17:00	F	20	Caucasian
1416V021612_FLU	Flu	13	32410358	96.47	49624604	43917210	88.5	61	33596858	76.5	32638139	2479513972	2427577128	76	49.94	1342787038	27811379	56313	184922787	121823775	0.25	0.11	0.56	0.47	52.62	99.8	7.25	4.77	86.1	1.88	65.83	33.48	2552050718	3337707960	48098120	854447678	5		1416V021612	IGTB1416	IGTB1416	TRUE	0.958559	FLU	2012-02-16	08:42:00	M	36	Caucasian
1437V110911_FLU	Flu	13	32242486	96.78	47033442	41445872	88.12	63	33314786	80.38	32110186	2439388228	2386360694	76	49.95	1331990827	27106847	55709	178495584	129917834	0.25	0.12	0.55	0.48	52.64	99.79	7.05	5.13	85.21	2.61	68.46	32.57	2530596134	3149886272	65958880	824280290	5		1437V110911	IGTB1437	IGTB1437	TRUE	0.960164	FLU	2011-11-09	08:34:00	F	37	Caucasian
1570V112211_FLU	Flu	13	33539754	95.06	56502882	45506486	80.54	2501	35282468	77.53	34024490	2584886484	2505864123	76	49.92	1398478496	29047992	54154	187500483	119676168	0.25	0.11	0.52	0.49	52.18	99.81	7	4.47	86.06	2.48	66.69	33.88	2680128269	3458492936	66439656	908071056	4		1570V112211	IGTB1570	IGTB1570	TRUE	0.960281	FLU	2011-11-22	07:55:00	M	23	Caucasian
1607V120811_FLU	Flu	13	29174726	95.45	44778006	36952006	82.52	1971	30565088	82.72	29535139	2243823856	2173528221	76	49.91	1227472630	25293653	43906	139673897	99506439	0.25	0.11	0.51	0.47	52.87	99.83	6.02	4.29	86.99	2.72	71.92	34.12	2321850930	2808352456	63038808	792194835	4		1607V120811	IGTB1607	IGTB1607	TRUE	0.960867	FLU	2011-12-08	08:17:00	M	21	Caucasian
1601V112211_IFN	IFNB1	13	39903684	97.56	48666482	43830870	90.06	586	40900072	93.31	39428023	2995522258	2933211230	76	49.98	1741235196	34351521	48660	200123533	115066327	0.26	0.13	0.56	0.48	56.04	99.86	6.44	3.7	87.49	2.36	81.61	31.45	3107059347	3331146120	73388944	977283407	2		1601V112211	IGTB1601	IGTB1601	TRUE	0.96104	IFN	2011-11-22	08:23:00	F	21	African-American
0230V011712_FLU	Flu	13	28403330	95.49	48310652	39382198	81.52	2068	29744973	75.53	28779066	2186375979	2116767731	76	49.91	1190869882	25016057	42012	146356134	97473883	0.27	0.1	0.45	0.49	52.71	99.83	6.48	4.31	87.47	1.74	66.03	34.76	2259397320	2993047048	39346264	785374154	4		0230V011712	IGTB230	IGTB230	TRUE	0.964079	FLU	2012-01-17	07:52:00	F	26	Caucasian
1168V062811_FLU	Flu	13	31089128	96.96	43704296	38418296	87.91	36	32062276	83.46	30971227	2352886337	2301431493	76	49.95	1301753554	26487007	49481	159345373	113069257	0.25	0.14	0.64	0.47	53.45	99.81	6.54	4.64	86.5	2.32	72.15	33.05	2435584335	2919790496	56486240	804962972	5		1168V062811	IGTB1168	IGTB1168	TRUE	0.96569	FLU	2011-06-28	07:56:00	M	46	Caucasian
0865V080311_FLU	Flu	13	27164458	95.39	45887286	37286660	81.26	1998	28476472	76.37	27569008	2094407383	2026548257	76	49.89	1175747205	24403034	37382	116473568	85321687	0.28	0.1	0.46	0.49	54.36	99.85	5.38	3.94	88.98	1.7	67.91	34.62	2162977804	2833786160	36677904	748779523	4		0865V080311	IGTB865	IGTB865	TRUE	0.966536	FLU	2011-08-03	08:17:00	F	20	Caucasian
1416V021612_IFN	IFNB1	13	46086918	97.58	56321652	50945570	90.45	588	47230587	92.71	45243356	3436971542	3367734137	76	49.95	1990978328	39780646	54786	210743038	121493336	0.27	0.15	0.66	0.46	55.5	99.86	5.87	3.39	87.69	3.05	81.25	32.19	3587653192	3871863320	109556736	1154951348	2		1416V021612	IGTB1416	IGTB1416	TRUE	0.966661	IFN	2012-02-16	08:42:00	M	36	Caucasian
1532V112911_FLU	Flu	13	29223982	95.18	47440972	39184772	82.6	2182	30704669	78.36	29685230	2255011096	2180684408	76	49.91	1239660514	25493847	45393	154083493	99691202	0.26	0.12	0.54	0.48	53.16	99.82	6.61	4.27	86.95	2.17	68.1	33.8	2332144596	2978042672	50501088	788244734	4		1532V112911	IGTB1532	IGTB1532	TRUE	0.967894	FLU	2011-11-29	08:25:00	F	24	Caucasian
1168V062811_IFN	IFNB1	13	35124388	96.29	53316154	45919878	86.13	19	36477103	79.44	35084841	2665091678	2600087880	76	49.94	1512160563	30204256	53511	171682120	120701330	0.26	0.13	0.55	0.47	54.58	99.82	6.2	4.36	86.73	2.72	68.86	32.15	2770674934	3489910728	75331808	890860157	1		1168V062811	IGTB1168	IGTB1168	TRUE	0.969326	IFN	2011-06-28	07:56:00	M	46	Caucasian
0277V102511_IFN	IFNB1	13	49023414	97.63	59349068	53494028	90.13	549	50211767	93.86	48549770	3688281261	3606464865	76	49.97	2121151005	42624399	60193	218512023	140291424	0.28	0.15	0.6	0.46	55.61	99.86	5.73	3.68	88.46	2.13	83	32.85	3814210466	4065546128	81254488	1253049415	2		0277V102511	IGTB277	IGTB1607	FALSE	0.970453	IFN	2011-12-08	08:17:00	M	21	Caucasian
1355V060711_IFN	IFNB1	13	33626116	96.47	51730852	44094138	85.24	25	34857513	79.05	33679378	2558656319	2497612177	76	49.95	1468340503	29664183	40686	151419767	99591939	0.27	0.12	0.52	0.46	55.45	99.86	5.72	3.76	88.48	2.04	69.92	33.03	2647966856	3351154488	53965016	874681081	1		1355V060711	IGTB1355	IGTB1355	TRUE	0.970596	IFN	2011-06-07	08:18:00	M	28	African-American
1547V110111_FLU	Flu	13	37727396	96.94	53942954	47518782	88.09	56	38916703	81.9	37592513	2855674045	2794768566	76	49.95	1595965443	32313505	62112	187022609	133974449	0.24	0.13	0.58	0.47	53.99	99.81	6.33	4.53	86.78	2.37	71.03	32.78	2955925657	3611427432	69953592	969063194	5		1547V110111	IGTB1547	IGTB1547	TRUE	0.970734	FLU	2011-11-01	07:46:00	M	21	Caucasian
0874V121411_FLU	Flu	13	30309630	95.97	47275390	38708370	81.88	2007	31581702	81.59	30504422	2317456662	2246619596	76	49.95	1299198638	26362132	45404	168110047	94909510	0.27	0.11	0.47	0.49	54.15	99.83	7.01	3.96	86.89	2.15	70.86	32.73	2399051208	2941836120	51562352	785298222	4		0874V121411	IGTB874	IGTB874	TRUE	0.970809	FLU	2011-12-14	08:20:00	F	22	Caucasian
0312V011012_FLU	Flu	13	34072434	95.3	53897594	44669870	82.88	2338	35751765	80.04	34620598	2630179284	2546277283	76	49.91	1438470939	29811512	51984	171525138	121432597	0.26	0.1	0.48	0.48	52.97	99.83	6.32	4.47	87.23	1.99	69.78	34.26	2715879369	3394910120	53977632	930503708	4		0312V011012	IGTB312	IGTB312	TRUE	0.971673	FLU	2012-01-10	08:45:00	F	28	Caucasian
1231V110211_IFN	IFNB1	13	32328528	97.43	39430826	35696522	90.53	425	33180588	92.95	31904779	2423741126	2372148693	76	49.96	1397823275	27739216	44131	163732354	96710226	0.27	0.16	0.68	0.46	55.46	99.84	6.5	3.84	87.14	2.53	80.96	31.68	2520441134	2712935672	63687392	798527768	2		1231V110211	IGTB1231	IGTB1231	TRUE	0.972413	IFN	2011-11-02	07:47:00	F	51	Caucasian
1547V110111_IFN	IFNB1	13	48477206	97.45	59344276	53506998	90.16	685	49746242	92.97	47639077	3618733333	3544965820	76	49.96	2086039232	41399052	73111	228550028	138500187	0.25	0.14	0.65	0.47	55.21	99.82	6.05	3.67	87.02	3.27	80.86	31.81	3778459571	4066531848	123467928	1201995685	2		1547V110111	IGTB1547	IGTB1547	TRUE	0.972467	IFN	2011-11-01	07:46:00	M	21	Caucasian
1355V060711_FLU	Flu	13	36110984	98.07	45694608	41110406	89.97	194	36822386	89.57	35363787	2686596620	2640556776	76	49.98	1471678237	30451686	51579	185315652	107931107	0.26	0.11	0.5	0.47	52.61	99.83	6.63	3.86	86.36	3.16	77.31	33.74	2797134322	3124390856	88446064	943817640	3		1355V060711	IGTB1355	IGTB1355	TRUE	0.9729	FLU	2011-06-07	08:18:00	M	28	African-American
1566V112311_FLU	Flu	13	37746124	95.57	60635528	50633046	83.5	2686	39496392	78.01	38177554	2900460834	2810217070	76	49.9	1602549428	32952112	58868	195956458	132711184	0.25	0.1	0.49	0.49	53.41	99.82	6.53	4.42	87.05	2	67.87	33.64	3000242421	3848111496	59914752	1009144008	4		1566V112311	IGTB1566	IGTB1566	TRUE	0.973339	FLU	2011-11-23	07:40:00	F	20	Caucasian
1355V060711_baseline	Baseline	13	41070894	97.72	49895652	44464328	89.11	968	42029927	94.53	40231507	3056266250	2999706814	76	49.99	1708069155	34852016	62271	228100402	126046768	0.27	0.11	0.46	0.47	53.5	99.82	7.14	3.95	86.04	2.87	81.29	32.54	3192642396	3379288928	91647792	1038843540	6		1355V060711	IGTB1355	IGTB1355	TRUE	0.973398	baseline	2011-06-07	08:18:00	M	28	African-American
1671V011712_FLU	Flu	13	34057524	94.99	55297024	45628632	82.52	2459	35852613	78.57	34538410	2623764213	2541285339	76	49.89	1418566571	29556623	49869	194339938	118290481	0.26	0.1	0.46	0.49	52.09	99.83	7.14	4.34	86.38	2.14	67.84	34.29	2723246234	3467776032	58212200	933877018	4		1671V011712	IGTB1671	IGTB1671	TRUE	0.974221	FLU	2012-01-17	08:18:00	M	24	African-American
1531V111611_IFN	IFNB1	13	36312242	97.69	43415828	39508544	91	486	37170797	94.08	35825061	2721503463	2665775783	76	49.98	1565552576	31122929	51072	172894628	116044471	0.27	0.12	0.49	0.47	55.45	99.84	6.12	4.11	87.24	2.53	82.03	31.79	2823462216	3002649344	71405800	897616668	2		1531V111611	IGTB1531	IGTB1531	TRUE	0.974548	IFN	2011-11-16	08:16:00	F	23	Caucasian
1671V011712_IFN	IFNB1	13	46222104	97.87	57263406	50185322	87.64	167	47229010	94.11	45246822	3435877207	3377472182	76	49.96	1969726457	38916356	70968	250855124	151926522	0.26	0.13	0.55	0.48	54.93	99.82	7	4.24	85.72	3.05	80.6	30.79	3586020444	3814084472	109398504	1104248980	3		1671V011712	IGTB1671	IGTB1671	TRUE	0.975353	IFN	2012-01-17	08:18:00	M	24	African-American
1360V102011_FLU	Flu	13	40169702	95.64	66104314	53897706	81.53	2997	41999489	77.92	40636907	3087325322	2994111910	76	49.93	1659111732	35022529	62929	205338799	141908149	0.27	0.11	0.47	0.48	52	99.82	6.44	4.45	87.27	1.85	67.97	35.27	3190525005	4096225656	59042728	1125154441	4		1360V102011	IGTB1360	IGTB1360	TRUE	0.975538	FLU	2011-10-20	07:49:00	F	32	African-American
0490V111011_FLU	Flu	13	36096590	96.78	53612846	46904324	87.49	72	37295677	79.51	36041271	2737939115	2679761189	76	49.95	1483955252	30517725	60445	201427399	134010441	0.25	0.12	0.55	0.48	52.38	99.8	7.11	4.73	85.66	2.5	68.07	33.27	2832914836	3564728624	70932928	942641503	5		0490V111011	IGTB490	IGTB490	TRUE	0.975569	FLU	2011-05-12	07:57:00	F	26	Caucasian
1290V120611_FLU	Flu	13	38199392	95.61	63171728	51967258	82.26	2996	39953805	76.88	38638602	2935566632	2845153381	76	49.92	1604840654	33422322	57089	190205528	133617297	0.26	0.11	0.49	0.48	52.88	99.83	6.27	4.4	87.23	2.1	67.04	34.36	3035079136	3949511608	63728584	1042717933	4		1290V120611	IGTB1290	IGTB1290	TRUE	0.975892	FLU	2011-12-06	08:07:00	F	21	Caucasian
1231V110211_FLU	Flu	13	35728006	97.03	51857982	45892690	88.5	39	36823326	80.24	35726742	2714130034	2653646048	76	49.96	1495434235	30641244	62086	192208710	134759203	0.25	0.12	0.53	0.48	53.46	99.8	6.87	4.82	86.67	1.64	69.51	33.21	2797123272	3487844440	45880744	928869017	5		1231V110211	IGTB1231	IGTB1231	TRUE	0.975906	FLU	2011-11-02	07:47:00	F	51	Caucasian
1164V120111_FLU	Flu	13	32465170	95.57	53875808	43938406	81.56	2436	33968488	77.31	32655993	2480956718	2402923725	76	49.9	1329228504	27782466	53770	180662173	117735660	0.27	0.11	0.48	0.48	51.51	99.81	7	4.56	85.51	2.93	66.07	33.99	2580388082	3339318856	75613008	877187628	4		1164V120111	IGTB1164	IGTB1164	TRUE	0.976181	FLU	2011-04-27	07:45:00	F	23	Caucasian
1399V111011_FLU	Flu	13	38729654	96.92	55991560	48422348	86.48	109	39962234	82.53	38400558	2917259753	2853818811	76	49.96	1620253518	32610228	62364	208474443	152413280	0.25	0.15	0.67	0.47	53.37	99.81	6.87	5.02	85.21	2.9	70.29	31.84	3035607165	3680098448	88103912	966416412	5		1399V111011	IGTB1399	IGTB1399	TRUE	0.976892	FLU	2011-11-10	08:28:00	F	27	Caucasian
1385V072011_IFN	IFNB1	13	33756098	98.12	40476834	35991840	88.92	123	34402053	95.58	33109794	2515366143	2472396389	76	49.98	1403314175	28124450	51117	197568979	107958108	0.28	0.12	0.46	0.47	53.7	99.82	7.56	4.13	85.42	2.89	81.6	31.72	2613300103	2735379840	75636872	828864128	3		1385V072011	IGTB1385	IGTB1385	TRUE	0.97794	IFN	2011-07-20	07:34:00	M	30	Caucasian
1290V120611_IFN	IFNB1	13	38177994	97.64	46319064	41701502	90.03	489	39102627	93.77	37807867	2872278655	2813491148	76	49.97	1665069436	33374851	47946	161947029	99159983	0.28	0.14	0.58	0.47	56.06	99.86	5.45	3.34	89.12	2.09	83.53	33.06	2970360466	3169314152	62094128	982126963	2		1290V120611	IGTB1290	IGTB1290	TRUE	0.977992	IFN	2011-12-06	08:07:00	F	21	Caucasian
0797V071411_IFN	IFNB1	13	35881618	97.94	43957720	38721388	88.09	128	36637131	94.62	35013466	2659265107	2611919874	76	49.98	1518807320	29905026	54913	202628639	117867551	0.26	0.12	0.55	0.48	54.59	99.82	7.28	4.24	84.97	3.51	80.33	30.38	2782258732	2942825488	97754544	845297359	3		0797V071411	IGTB797	IGTB797	TRUE	0.978025	IFN	2011-07-14	08:11:00	M	34	Caucasian
1297V120711_FLU	Flu	13	27690652	95.07	46164404	37940352	82.19	2079	29125407	76.77	28131082	2137072574	2067349676	76	49.89	1152576522	23883422	48085	157949559	108333494	0.26	0.1	0.47	0.48	52.1	99.8	7.14	4.9	85.78	2.18	65.82	33.69	2212358982	2883466752	48281432	745248005	4		1297V120711	IGTB1297	IGTB1297	TRUE	0.978744	FLU	2011-12-07	08:52:00	F	19	Caucasian
1360V102011_IFN	IFNB1	13	35062126	97.39	43011028	38743554	90.08	415	36003540	92.93	34501457	2621127900	2565936069	76	49.97	1513415401	30240776	46400	163652598	93791345	0.27	0.16	0.64	0.46	55.34	99.85	5.98	3.43	87.63	2.96	81.39	32.29	2734973920	2944510104	80930728	883228372	2		1360V102011	IGTB1360	IGTB1360	TRUE	0.97904	IFN	2011-10-20	07:49:00	F	32	African-American
1021V071911_FLU	Flu	13	28372622	95.19	45780468	36836262	80.46	2009	29807586	80.92	28783763	2186529299	2114903249	76	49.91	1198688166	24572418	43853	179889694	90886972	0.26	0.1	0.43	0.5	52.94	99.82	7.95	4.01	85.93	2.11	69.5	32.99	2264045521	2799555912	47707632	746909653	4		1021V071911	IGTB1021	IGTB1021	TRUE	0.979524	FLU	2011-07-19	08:00:00	M	36	East Asian
0839V112211_FLU	Flu	13	32436934	94.81	54277150	43398012	79.96	2338	34211916	78.83	33038128	2509924546	2428624234	76	49.89	1393526280	28499498	49907	171471260	114734329	0.27	0.13	0.55	0.47	53.62	99.83	6.6	4.41	86.92	2.07	68.49	33.3	2598825097	3298248912	53702360	865421798	4		0839V112211	IGTB839	IGTB839	TRUE	0.979859	FLU	2011-11-22	08:13:00	M	22	Caucasian
1399V111011_IFN	IFNB1	13	43390932	97.68	52483832	47528258	90.56	580	44423045	93.47	42636948	3238685406	3170782272	76	49.98	1875221649	37025598	57217	205598111	142234528	0.26	0.14	0.64	0.46	55.58	99.85	6.09	4.22	86.81	2.88	81.09	31.23	3374045384	3612147608	97254920	1053818201	2		1399V111011	IGTB1399	IGTB1399	TRUE	0.979898	IFN	2011-11-10	08:28:00	F	27	Caucasian
0490V111011_IFN	IFNB1	13	45733118	97.65	55190634	50151256	90.87	645	46831792	93.38	45280107	3439793779	3371198914	76	49.97	1982519893	39345244	62495	226872439	135025088	0.26	0.14	0.61	0.47	55.73	99.84	6.38	3.8	87.69	2.13	81.85	31.96	3557373694	3811495456	75915640	1137088825	2		0490V111011	IGTB490	IGTB490	TRUE	0.980402	IFN	2011-05-12	07:57:00	F	26	Caucasian
0797V071411_FLU	Flu	13	34194054	95.22	56114040	44832572	79.9	2484	35908810	80.1	34609302	2629320561	2545835879	76	49.92	1469610512	29841446	46875	183625190	102037729	0.26	0.11	0.51	0.49	53.88	99.84	6.73	3.74	87.06	2.47	69.69	33.18	2727752465	3407275472	67476448	905040995	4		0797V071411	IGTB797	IGTB797	TRUE	0.980717	FLU	2011-07-14	08:11:00	M	34	Caucasian
1021V071911_IFN	IFNB1	13	27774742	98.02	33726932	29928412	88.74	111	28336571	94.68	27215454	2066803772	2030288381	76	49.97	1178219175	23222880	41441	165780912	86666034	0.27	0.12	0.51	0.48	54.76	99.82	7.7	4.03	85.32	2.95	80.71	30.57	2151696793	2274559312	63431880	657677652	3		1021V071911	IGTB1021	IGTB1021	TRUE	0.980939	IFN	2011-07-19	08:00:00	M	36	East Asian
0899V030811_IFN	IFNB1	13	27036822	96.13	41216998	35605004	86.38	19	28124664	78.99	27046673	2054865102	2004942951	76	49.93	1171802303	23509256	37163	125679586	91514641	0.28	0.13	0.54	0.46	54.84	99.84	5.88	4.28	87.3	2.53	68.93	32.46	2136596044	2705980304	54151064	693474392	1		0899V030811	IGTB899	IGTB899	TRUE	0.981306	IFN	2011-03-08	07:57:00	M	51	African-American
1297V120711_IFN	IFNB1	13	43911544	97.47	53209506	48291402	90.76	566	45052048	93.29	43348752	3293457786	3224514550	76	49.97	1884279268	37717797	57561	215344055	128530495	0.27	0.13	0.57	0.47	55.05	99.85	6.29	3.76	87.28	2.68	81.39	32.22	3422588785	3670146552	91584712	1102890995	2		1297V120711	IGTB1297	IGTB1297	TRUE	0.981812	IFN	2011-12-07	08:52:00	F	19	Caucasian
1399V111011_baseline	Baseline	13	30675954	97.43	37867422	33542136	88.58	739	31483691	93.86	30102870	2286772264	2241635033	76	49.98	1276889464	25475347	51704	191984127	118612672	0.26	0.12	0.53	0.47	53.39	99.8	8.03	4.96	84.11	2.9	78.91	30.72	2391485797	2549202336	69372040	734676161	6		1399V111011	IGTB1399	IGTB1399	TRUE	0.982148	baseline	2011-11-10	08:28:00	F	27	Caucasian
1553V011212_IFN	IFNB1	13	42139398	98.2	50676574	45207646	89.21	170	42911917	94.92	41016218	3113628214	3062750479	76	49.98	1774542422	35241340	72508	220181849	134244010	0.27	0.12	0.53	0.49	54.48	99.79	6.76	4.12	85.78	3.35	81.32	31.3	3257153767	3435781096	108995248	1019389686	3		1553V011212	IGTB1553	IGTB1553	TRUE	0.982202	IFN	2012-01-12	08:47:00	F	29	Caucasian
1366V102611_FLU	Flu	13	36959568	95.57	58071140	47010244	80.95	2609	38671301	82.26	37410402	2842164600	2753203074	76	49.93	1639914329	32770959	54090	161183046	128294224	0.26	0.11	0.53	0.49	55.82	99.84	5.49	4.37	88.29	1.86	72.59	32.47	2937659107	3572778544	54563288	953733257	4		1366V102611	IGTB1366	IGTB1366	TRUE	0.98229	FLU	2011-10-26	08:15:00	F	19	Caucasian
1531V111611_FLU	Flu	13	36870618	95.54	59206972	48244582	81.48	2670	38593539	80	37260156	2830422937	2745751700	76	49.94	1564421603	32328547	54158	183693971	116411963	0.27	0.12	0.54	0.48	53.37	99.83	6.27	3.97	87.6	2.17	70.03	34.23	2931316504	3666588232	63465928	1003367183	4		1531V111611	IGTB1531	IGTB1531	TRUE	0.982322	FLU	2011-11-16	08:16:00	F	23	Caucasian
0697V120611_IFN	IFNB1	13	34389538	97.45	41665406	37911446	90.99	441	35290112	93.09	34025264	2584797331	2530786773	76	49.97	1491373799	29902763	44858	158962843	91547661	0.28	0.14	0.61	0.46	55.63	99.85	5.93	3.42	88.37	2.29	82.21	32.73	2680660569	2881269896	61376080	877442604	2		0697V120611	IGTB697	IGTB697	TRUE	0.982654	IFN	2011-12-06	08:59:00	F	49	Caucasian
0641V101811_FLU	Flu	13	36764460	95.66	60227176	49286038	81.83	2603	38430747	77.97	36980889	2809677819	2720251697	76	49.89	1496771922	31542222	60756	214897284	132408308	0.26	0.11	0.49	0.48	51.27	99.81	7.36	4.54	85.42	2.68	66.58	34.15	2919491925	3745738888	78322864	997124267	4		0641V101811	IGTB641	IGTB641	TRUE	0.982666	FLU	2011-10-18	08:16:00	M	49	Caucasian
0501V120811_FLU	Flu	13	31757426	95.77	52190860	42744578	81.9	2353	33160882	77.58	32204755	2446738073	2371233869	76	49.92	1306409973	27505255	53305	176396213	120034998	0.26	0.1	0.49	0.49	51.86	99.81	7	4.77	86.57	1.66	67.13	34.71	2519060647	3248587928	41794984	874443936	4		0501V120811	IGTB501	IGTB501	TRUE	0.982747	FLU	2011-12-08	08:13:00	F	28	Caucasian
0731V012412_IFN	IFNB1	13	30009118	97.63	36246868	32780690	90.44	390	30737201	93.77	29668984	2254047434	2206917389	76	49.97	1305998301	25914436	38210	136217469	94731923	0.27	0.15	0.63	0.46	55.93	99.85	5.83	4.06	87.8	2.31	82.29	31.87	2334999103	2491332440	53847064	744232976	2		0731V012412	IGTB731	IGTB731	TRUE	0.983271	IFN	2012-01-24	NA	F	28	Caucasian
1105V111511_FLU	Flu	13	36773126	96.89	51733784	44944698	86.88	67	37951653	84.44	36579239	2778749827	2720714485	76	49.96	1565949505	31751223	55715	175729125	116408800	0.26	0.13	0.57	0.48	54.32	99.82	6.1	4.04	87.44	2.43	73.79	33.11	2882695502	3415797048	70075952	954585090	5		1105V111511	IGTB1105	IGTB1105	TRUE	0.983311	FLU	2011-11-15	08:30:00	M	36	African-American
0374V121311_FLU	Flu	13	31230650	95.13	53754650	44212416	82.25	2468	32830237	74.26	31663304	2405430976	2326155610	76	49.88	1251401038	26553092	52999	198349849	120323317	0.26	0.11	0.51	0.48	50.18	99.8	7.95	4.83	84.41	2.82	62.64	34.22	2493742948	3360143616	70229624	853481348	4		0374V121311	IGTB374	IGTB374	TRUE	0.983451	FLU	2011-12-13	08:35:00	F	44	Caucasian
1366V102611_IFN	IFNB1	13	50872022	97.53	61497732	55759632	90.67	675	52158947	93.54	50587545	3843171150	3763913522	76	49.98	2265620094	44581153	74605	211842566	149756869	0.26	0.15	0.65	0.46	57.18	99.83	5.35	3.78	89.16	1.72	83.36	31.98	3962201969	4237732032	68007992	1267011431	2		1366V102611	IGTB1366	IGTB1366	TRUE	0.983556	IFN	2011-10-26	08:15:00	F	19	Caucasian
1652V011912_FLU	Flu	13	40032926	97.41	55816052	49012736	87.81	52	41098622	83.85	39709900	3016897427	2953907753	76	49.96	1670607693	33992088	61666	201778274	144482514	0.25	0.13	0.59	0.48	53.51	99.82	6.46	4.63	86.36	2.55	72.38	32.85	3122098065	3724967936	79643744	1025626929	5		1652V011912	IGTB1652	IGTB1652	TRUE	0.983718	FLU	2012-01-19	08:47:00	M	27	Caucasian
0678V081811_IFN	IFNB1	13	27745592	96.25	42993318	36861620	85.74	23	28826989	78.2	27784642	2110988061	2058307109	76	49.93	1216484169	24354513	34536	131267397	82318106	0.28	0.13	0.59	0.47	55.55	99.86	5.99	3.76	87.93	2.32	68.74	32.38	2190003505	2801483120	50795360	709160920	1		0678V081811	IGTB678	IGTB678	TRUE	0.98391	IFN	2011-08-18	08:23:00	M	34	Caucasian
1360V102011_baseline	Baseline	13	42997044	97.72	52095596	46554390	89.36	983	43998356	94.51	42135261	3200933501	3140846771	76	49.99	1816614686	36256703	70755	234183166	140645460	0.26	0.11	0.46	0.47	54.35	99.81	7.01	4.21	85.93	2.86	81.17	31.57	3342192207	3538133640	95534584	1055275232	6		1360V102011	IGTB1360	IGTB1360	TRUE	0.984135	baseline	2011-10-20	07:49:00	F	32	African-American
1294V121411_IFN	IFNB1	13	36493552	97.59	44165450	39788304	90.09	502	37393514	93.98	36145496	2746076577	2689689797	76	49.99	1609428878	31590740	55233	139718985	134525855	0.27	0.15	0.66	0.46	56.66	99.83	4.92	4.74	88.17	2.18	82.83	31.51	2840661146	3023911104	61794384	895228460	2		1294V121411	IGTB1294	IGTB1294	TRUE	0.984163	IFN	2011-12-14	08:45:00	F	19	Caucasian
0469V072811_IFN	IFNB1	13	38059042	97.76	45539744	41430332	90.98	531	38932537	93.97	37424342	2843034035	2785135161	76	49.99	1634416092	32358619	50573	192519209	119485159	0.27	0.12	0.52	0.47	55.27	99.84	6.51	4.04	86.63	2.82	81.37	31.37	2957311505	3148705232	83373672	927572207	2		0469V072811	IGTB469	IGTB469	TRUE	0.984203	IFN	2011-07-28	08:15:00	F	30	Caucasian
1229V062811_FLU	Flu	13	33636246	97.25	47223082	41563122	88.01	46	34589195	83.22	33271719	2527704091	2473046565	76	49.96	1372239845	28551443	51986	171350300	116441597	0.25	0.14	0.6	0.47	52.23	99.82	6.52	4.43	86.03	3.01	71.56	33.81	2627479704	3158797272	79191848	888304419	5		1229V062811	IGTB1229	IGTB1229	TRUE	0.984686	FLU	2011-06-28	08:22:00	F	28	Caucasian
1592V113011_IFN	IFNB1	13	31583774	97.81	38695028	34082952	88.08	110	32289838	94.74	31165361	2367022207	2323426154	76	49.96	1347749970	26796058	48366	161980443	113235921	0.27	0.13	0.55	0.48	54.96	99.82	6.61	4.62	86.5	2.28	81.89	31.54	2452237653	2590304352	56005768	773320801	3		1592V113011	IGTB1592	IGTB1592	TRUE	0.984699	IFN	2011-11-30	07:59:00	F	23	Caucasian
1222V062311_baseline	Baseline	13	39575664	97.53	48588360	43385118	89.29	891	40577021	93.53	38913960	2956198759	2895858747	76	49.98	1656010162	33148456	63513	255406809	118964965	0.27	0.12	0.5	0.47	53.73	99.81	8.29	3.86	85.08	2.77	79.54	31.36	3082317218	3297268968	85515504	966476617	6		1222V062311	IGTB1222	IGTB1222	TRUE	0.984852	baseline	2011-06-23	08:17:00	F	25	Caucasian
1553V011212_FLU	Flu	13	32986894	95.31	52645092	42279176	80.31	2366	34609895	81.86	33410286	2538112403	2460612738	76	49.92	1388649406	28663411	48669	176924544	116068180	0.26	0.09	0.39	0.5	52.82	99.83	6.73	4.42	86.69	2.17	70.93	33.87	2628902707	3213217376	56916248	890384491	4		1553V011212	IGTB1553	IGTB1553	TRUE	0.984888	FLU	2012-01-12	08:47:00	F	29	Caucasian
0888V111511_IFN	IFNB1	13	36518464	97.61	43841550	39848598	90.89	486	37410945	93.88	35959025	2731514944	2672505774	76	49.98	1593450281	31321363	49583	179469159	107127112	0.27	0.15	0.62	0.47	56.08	99.84	6.32	3.77	87.23	2.68	81.85	31.15	2841490522	3028493448	76253992	885254885	2		0888V111511	IGTB888	IGTB888	TRUE	0.985131	IFN	2011-11-15	08:15:00	F	21	Caucasian
0109V022912_FLU	Flu	13	32408338	95.35	52540328	43373302	82.55	2360	33987993	78.36	32888878	2498381833	2420149772	76	49.89	1370944819	28135427	50598	169325768	121018747	0.25	0.12	0.57	0.47	53.11	99.82	6.56	4.69	86.67	2.08	67.88	33.57	2581572085	3296370952	53750544	866571511	4		0109V022912	IGTB109	IGTB109	TRUE	0.985156	FLU	2012-02-29	08:28:00	M	53	Caucasian
1652V011912_IFN	IFNB1	13	26400748	97.53	32111248	29035656	90.42	378	27068413	93.22	26127982	1984869379	1941335024	76	49.97	1151796856	22658790	39880	118684494	90299848	0.26	0.15	0.66	0.47	56.02	99.82	5.77	4.39	87.33	2.51	81.37	31.31	2056112397	2206709856	51602632	643760155	2		1652V011912	IGTB1652	IGTB1652	TRUE	0.985171	IFN	2012-01-19	08:47:00	M	27	Caucasian
0374V121311_IFN	IFNB1	13	43290782	97.55	52176988	47530178	91.09	526	44379542	93.37	42932841	3261420483	3191899910	76	49.98	1881230482	37295397	62727	200280358	142824732	0.26	0.13	0.56	0.47	55.81	99.83	5.94	4.24	87.65	2.18	81.79	31.84	3371018765	3612293528	73412048	1073321218	2		0374V121311	IGTB374	IGTB374	TRUE	0.985283	IFN	2011-12-13	08:35:00	F	44	Caucasian
1361V062311_baseline	Baseline	13	29636636	97.32	36461338	32484730	89.09	651	30451350	93.74	29205483	2218496745	2168780931	76	49.98	1258456883	24965685	46912	177200932	98462832	0.26	0.12	0.54	0.47	54.41	99.81	7.66	4.26	85.46	2.63	80.06	31.05	2312909401	2468839480	60734184	718101980	6		1361V062311	IGTB1361	IGTB1361	TRUE	0.985367	baseline	2011-06-23	08:03:00	M	21	Caucasian
0568V112911_FLU	Flu	13	35587566	94.74	60887118	50099390	82.28	2690	37562490	74.98	36417353	2766751678	2678567363	76	49.9	1495091332	31284991	58574	184497344	133997928	0.26	0.11	0.48	0.49	52.4	99.81	6.47	4.7	87.06	1.78	65.25	34.67	2853477067	3807553640	50669656	989247150	4		0568V112911	IGTB568	IGTB568	TRUE	0.985458	FLU	2011-11-29	08:17:00	F	29	Caucasian
1361V062311_FLU	Flu	13	35228588	97	49568162	42985700	86.72	113	36319868	84.49	34960667	2655859268	2596793953	76	49.96	1481190451	29974186	53244	178146626	126411618	0.25	0.13	0.57	0.47	53.69	99.82	6.46	4.58	86.18	2.78	72.78	32.49	2758768834	3266913200	76718808	896355391	5		1361V062311	IGTB1361	IGTB1361	TRUE	0.985639	FLU	2011-06-23	08:03:00	M	21	Caucasian
0277V102511_FLU	Flu	13	40051838	95.31	63895324	52330774	81.9	2881	42022202	80.3	40653488	3088348972	2988512428	76	49.9	1680243205	35213615	57230	211061766	130552583	0.27	0.1	0.44	0.49	52.64	99.84	6.61	4.09	87.4	1.89	70.15	34.77	3192063019	3977138824	60480192	1109763218	4		0277V102511	IGTB277	IGTB277	TRUE	0.986022	FLU	2011-10-25	08:26:00	M	24	African-American
1365V071211_IFN	IFNB1	13	40212332	98.02	48736462	43255892	88.75	144	41023474	94.84	39499935	3000728467	2949260980	76	49.98	1705501591	33855756	61096	213116026	138750840	0.27	0.12	0.51	0.48	54.73	99.82	6.84	4.45	85.98	2.73	81.5	31.25	3116141569	3287447792	84923008	973902830	3		1365V071211	IGTB1365	IGTB1365	TRUE	0.986023	IFN	2011-07-12	08:05:00	F	29	Caucasian
1592V113011_FLU	Flu	13	30395998	94.46	52869572	42624508	80.62	2296	32179266	75.49	30888792	2346602972	2263909336	76	49.85	1285472364	26627701	48116	159255141	111907892	0.25	0.12	0.54	0.48	52.59	99.82	6.52	4.58	86.14	2.77	65	33.55	2444423714	3239462608	67690920	820138507	4		1592V113011	IGTB1592	IGTB1592	TRUE	0.9861	FLU	2011-11-30	07:59:00	F	23	Caucasian
1203V042011_FLU	Flu	13	34128430	97.71	49566636	44395436	89.57	178	34928960	78.68	33787918	2566863891	2521974749	76	49.96	1383417056	28771200	57481	199992755	105343114	0.25	0.14	0.62	0.47	52.14	99.8	7.54	3.97	86.08	2.42	67.69	33.94	2653388667	3374053136	64130776	900542358	3		1203V042011	IGTB1203	IGTB1203	TRUE	0.986101	FLU	2011-04-20	08:03:00	F	22	Caucasian
1248V121311_FLU	Flu	13	28826286	95.58	46128180	38129770	82.66	2000	30160519	79.1	29196481	2218001451	2148870182	76	49.9	1212064422	25020685	46866	152278994	109964048	0.26	0.1	0.47	0.49	52.91	99.81	6.65	4.8	86.5	2.06	68.38	33.59	2290949723	2897862520	47121368	769550808	4		1248V121311	IGTB1248	IGTB1248	TRUE	0.986134	FLU	2011-12-13	08:07:00	F	19	Caucasian
1438V081111_FLU	Flu	13	33434750	97.27	45032072	40424280	89.77	827	34374689	85.03	33029834	2509017545	2458609627	76	49.96	1377616413	28031037	59950	188366982	120737676	0.25	0.11	0.53	0.49	52.76	99.79	7.21	4.62	85.26	2.91	72.45	32.49	2610902371	3072245280	75892080	848354941	6		1438V081111	IGTB1438	IGTB1438	TRUE	0.986198	FLU	2011-08-11	08:09:00	F	22	East Asian
1114V042011_FLU	Flu	13	30563754	97.49	44205866	39437904	89.21	180	31351134	79.49	30253262	2298199537	2255829014	76	49.96	1226364516	25721824	52390	181987767	104104330	0.26	0.14	0.62	0.48	51.5	99.8	7.64	4.37	85.46	2.52	67.9	33.96	2381335754	2997280704	60122840	808796933	3		1114V042011	IGTB1114	IGTB1114	TRUE	0.986233	FLU	2011-01-05	07:51:00	M	48	African-American
0195V011212_FLU	Flu	13	45312390	95.72	69799242	56054028	80.31	2997	47337865	84.45	45189571	3428885524	3321122606	76	49.91	1846574355	37910458	82499	256755747	187401530	0.26	0.1	0.46	0.52	51.42	99.78	7.15	5.22	84.22	3.42	71	32.8	3591448967	4260106128	122879536	1178146044	4		0195V011212	IGTB195	IGTB195	TRUE	0.986258	FLU	2012-01-12	07:48:00	F	28	Caucasian
1361V062311_IFN	IFNB1	13	32588910	96.28	49958532	42840666	85.75	10	33847501	79.01	32536217	2471644433	2410267574	76	49.95	1408059716	28033101	51511	154560116	118843198	0.27	0.11	0.45	0.48	54.77	99.82	6.01	4.62	86.52	2.85	68.32	31.75	2571008445	3255890616	73250168	816349868	1		1361V062311	IGTB1361	IGTB1361	TRUE	0.986324	IFN	2011-06-23	08:03:00	M	21	Caucasian
1587V011712_FLU	Flu	13	33474556	95.58	55689520	45801832	82.25	2509	35021677	76.46	33860726	2572516531	2492692085	76	49.92	1396525739	29042711	53179	177606970	119989621	0.27	0.12	0.49	0.49	52.49	99.82	6.68	4.51	86.75	2.06	66.3	34.26	2660383832	3480939232	54900424	911388015	4		1587V011712	IGTB1587	IGTB1587	TRUE	0.986432	FLU	2012-01-17	08:15:00	F	20	Caucasian
1166V041211_FLU	Flu	13	36282698	97.7	50386114	44602162	88.52	194	37138681	83.27	35756917	2716431715	2668842183	76	49.97	1481359927	30271392	58765	212673277	114850667	0.26	0.14	0.6	0.47	52.51	99.81	7.54	4.07	85.39	3	71.07	32.88	2821057011	3389764312	84643024	927579330	3		1166V041211	IGTB1166	IGTB1166	TRUE	0.986476	FLU	2011-04-12	07:47:00	F	41	African-American
0412V021511_FLU	Flu	13	31878680	97.75	43293258	38478816	88.88	178	32611817	84.75	31190169	2369071838	2326314551	76	49.96	1295550668	26382298	55301	182397282	116912568	0.25	0.13	0.59	0.48	52.31	99.79	7.36	4.72	84.51	3.41	71.57	32.2	2476756130	2924390016	84502576	797466815	3		0412V021511	IGTB412	IGTB412	TRUE	0.986508	FLU	2011-09-29	07:40:00	M	54	Caucasian
0888V111511_FLU	Flu	13	42639944	97.2	59308764	51587266	86.98	43	43867329	85.04	42304788	3213774159	3145510901	76	49.97	1817331875	36426947	62663	217165337	141506052	0.24	0.12	0.62	0.49	54.54	99.83	6.52	4.25	86.77	2.47	73.74	32.23	3332092435	3920632216	82317880	1073827774	5		0888V111511	IGTB888	IGTB888	TRUE	0.986596	FLU	2011-11-15	08:15:00	F	21	Caucasian
1292V060211_FLU	Flu	13	37563216	97.19	50250628	44478536	88.51	38	38651165	86.9	37444835	2844520930	2788268984	76	49.97	1575978402	32260096	52909	192092353	118879680	0.26	0.1	0.49	0.48	53.68	99.84	6.54	4.05	87.25	2.16	75.78	33.57	2935872062	3380368736	63381112	985588195	5		1292V060211	IGTB1292	IGTB1292	TRUE	0.986609	FLU	2011-06-02	08:21:00	F	23	East Asian
1597V120611_FLU	Flu	13	37959052	95.64	60543232	50405214	83.25	2697	39690793	78.74	38310553	2910502976	2817894210	76	49.89	1554028139	32849012	56766	210604774	127185559	0.28	0.1	0.44	0.48	51.54	99.83	6.99	4.22	86.36	2.44	67.97	34.82	3015075081	3830796264	73421016	1049872851	4		1597V120611	IGTB1597	IGTB1597	TRUE	0.986621	FLU	2011-12-06	07:52:00	F	23	Caucasian
1164V120111_IFN	IFNB1	13	60866924	97.56	74117764	66987806	90.38	843	62390144	93.14	59797440	4542339433	4449585432	76	49.97	2604261534	51716096	82350	306843489	177499633	0.27	0.12	0.55	0.47	54.96	99.84	6.48	3.75	86.56	3.23	80.57	31.6	4738849975	5091073256	152846488	1497528106	2		1164V120111	IGTB1164	IGTB1164	TRUE	0.986624	IFN	2011-04-27	07:45:00	F	23	Caucasian
1319V120611_FLU	Flu	13	27833546	95.21	44648326	36613168	82	1850	29234860	79.85	28262587	2147140887	2078162637	76	49.9	1164770291	24364031	40840	147074341	89701283	0.26	0.1	0.49	0.49	52.45	99.83	6.62	4.04	87.14	2.2	69.54	34.69	2220719997	2782600768	48819664	770381961	4		1319V120611	IGTB1319	IGTB1319	TRUE	0.986753	FLU	2011-12-06	08:41:00	F	27	Caucasian
0899V030811_FLU	Flu	13	34191710	97.8	45051076	40095536	89	160	34960311	87.19	33600443	2552332787	2507949736	76	49.97	1419714447	28492080	57757	167829977	137609675	0.25	0.14	0.64	0.48	53.47	99.8	6.32	5.18	85.67	2.83	74.65	32.21	2655387471	3047260736	75127672	855167058	3		0899V030811	IGTB899	IGTB899	TRUE	0.986766	FLU	2011-03-08	07:57:00	M	51	African-American
0713V020311_FLU	Flu	13	37789270	97.91	49580822	43880656	88.5	178	38594773	87.95	37131474	2819891153	2771178154	76	49.98	1606657107	32014871	61612	179847734	119797992	0.25	0.14	0.63	0.48	54.82	99.81	6.14	4.09	87	2.78	76.45	32.18	2930677662	3334929856	81426704	943043145	3		0713V020311	IGTB713	IGTB713	TRUE	0.986787	FLU	2011-02-03	08:15:00	F	49	Caucasian
0187V080211_FLU	Flu	13	33705312	95.19	55154182	44916980	81.44	2398	35407527	78.83	34088821	2589584396	2502936027	76	49.9	1427153420	29509035	52054	185400464	101275317	0.27	0.1	0.48	0.48	53.06	99.82	6.89	3.77	87.02	2.32	68.56	33.96	2689514781	3413690480	62399344	913328663	4		0187V080211	IGTB187	IGTB187	TRUE	0.9868	FLU	2011-08-02	07:59:00	M	49	Caucasian
1037V090711_FLU	Flu	13	35419596	97.6	48063700	42736854	88.92	160	36290246	84.92	34725997	2638008309	2591835556	76	49.95	1440213099	29737429	55120	185685333	111444420	0.26	0.13	0.59	0.46	52.25	99.82	6.74	4.04	85.58	3.64	72.63	33.33	2756513943	3248000904	100384600	918856277	3		1037V090711	IGTB1037	IGTB1037	TRUE	0.986835	FLU	2011-09-07	08:06:00	M	20	African-American
0109V022912_IFN	IFNB1	13	33742236	97.48	41108934	37179904	90.44	469	34614484	93.1	33321563	2531426789	2479320662	76	49.96	1386594844	27684916	56127	168472350	206122228	0.26	0.13	0.58	0.47	52.73	99.8	6.41	7.84	83.17	2.58	77.4	30.44	2629420908	2825672704	67861312	800406764	2		0109V022912	IGTB109	IGTB109	TRUE	0.986867	IFN	2012-02-29	08:28:00	M	53	Caucasian
1319V120611_IFN	IFNB1	13	34489372	97.45	41994822	38133632	90.81	494	35392215	92.81	34028285	2585033435	2531689952	76	49.96	1486766486	29797736	43753	163169808	88139427	0.28	0.14	0.59	0.47	55.3	99.85	6.07	3.28	87.89	2.76	81.53	32.59	2688385969	2898156032	74172656	876184217	2		1319V120611	IGTB1319	IGTB1319	TRUE	0.98688	IFN	2011-12-06	08:41:00	F	27	Caucasian
1275V060811_FLU	Flu	13	29658320	97.14	41014586	35737584	87.13	29	30531606	85.43	29386082	2232465872	2184512513	76	49.97	1256223979	25386080	45389	156374939	87801801	0.26	0.13	0.59	0.47	54.17	99.82	6.74	3.79	86.74	2.73	74.07	32.58	2319250387	2716056384	63385520	755501215	5		1275V060811	IGTB1275	IGTB1275	TRUE	0.98699	FLU	2011-06-08	07:50:00	F	24	Caucasian
0119V052510_IFN	IFNB1	13	51136838	98.03	61220548	54659678	89.28	198	52165101	95.44	50499685	3836534045	3768404109	76	49.98	2144105587	43081936	88770	268871498	211924104	0.27	0.12	0.53	0.47	54.11	99.79	6.79	5.35	85.95	1.91	81.99	31.85	3962659311	4154135528	75841920	1261955195	3		0119V052510	IGTB119	IGTB119	TRUE	0.987078	IFN	2010-05-25	08:13:00	F	30	African-American
1521V011112_IFN	IFNB1	13	46965908	98.02	57358832	50494090	88.03	189	47915317	94.89	45950561	3488536609	3430297919	76	49.98	1963544202	39068958	82370	274575222	168481053	0.27	0.13	0.56	0.48	53.98	99.79	7.55	4.63	84.95	2.87	80.52	30.97	3637263847	3837550840	104530552	1126297769	3		1521V011112	IGTB1521	IGTB1521	TRUE	0.987182	IFN	2012-01-11	08:46:00	M	19	Caucasian
0190V030911_IFN	IFNB1	13	37312066	96.16	58020882	49828088	85.88	25	38803774	77.88	37497900	2848726711	2778087209	76	49.92	1625211495	32883997	45971	177413047	105793630	0.29	0.13	0.53	0.46	55.13	99.86	6.02	3.59	88.35	2.04	68.77	33.22	2947731964	3786934688	60177864	979173113	1		0190V030911	IGTB190	IGTB190	TRUE	0.98735	IFN	2011-03-09	07:50:00	M	29	Caucasian
1345V092811_FLU	Flu	13	30404974	97.11	42559498	37234772	87.49	45	31308786	84.08	30028881	2281213062	2231357896	76	49.96	1271364712	25821138	41799	166197438	95310435	0.26	0.13	0.58	0.48	53.46	99.84	6.99	4.01	85.93	3.07	72.22	32.47	2378182569	2829842672	73070960	772289015	5		1345V092811	IGTB1345	IGTB1345	TRUE	0.987386	FLU	2011-09-28	08:22:00	M	18	East Asian
1148V090811_IFN	IFNB1	13	29608006	96.21	44175486	37774114	85.51	12	30775335	81.47	29846010	2267392081	2209206568	76	49.98	1309160879	26199619	42308	134170621	86550815	0.29	0.12	0.51	0.47	56	99.84	5.74	3.7	88.85	1.71	72.35	32.85	2337747287	2870832664	39932224	767957907	1		1148V090811	IGTB1148	IGTB1148	TRUE	0.987411	IFN	2011-09-08	07:58:00	F	23	African-American
0670V081111_IFN	IFNB1	13	24851530	96.17	38390900	32928092	85.77	17	25841605	78.48	24933721	1894249769	1845293949	76	49.94	1087005460	21840117	33850	109605716	85160251	0.27	0.13	0.57	0.46	55.37	99.85	5.58	4.34	87.91	2.17	68.96	32.53	1963071858	2502534992	42689048	638633195	1		0670V081111	IGTB670	IGTB670	TRUE	0.987435	IFN	2011-08-11	08:15:00	F	25	Caucasian
1265V022212_baseline	Baseline	13	32760866	97.24	40310222	35964278	89.22	727	33690246	93.68	32217799	2447282150	2398752117	76	49.98	1337635066	27755797	52311	194515313	87940291	0.29	0.11	0.45	0.48	52.27	99.81	7.6	3.44	86	2.97	80.51	33.72	2558912294	2733285128	75904088	862978813	6		1265V022212	IGTB1265	IGTB1265	TRUE	0.987457	baseline	2012-02-22	08:27:00	M	20	Caucasian
0277V102511_baseline	Baseline	13	36068718	97.56	44044818	39300732	89.23	787	36970089	94.07	35376905	2687452912	2635398358	76	49.98	1517821621	30600441	56820	205674509	97861277	0.26	0.11	0.51	0.47	54.05	99.81	7.32	3.48	86.13	3.06	80.98	32.08	2808301459	2986855632	86052672	900951477	6		0277V102511	IGTB277	IGTB277	TRUE	0.987469	baseline	2011-10-25	08:26:00	M	24	African-American
0866V012611_FLU	Flu	13	33642988	97.77	45792140	41161522	89.89	175	34410069	83.6	33048086	2509992746	2466456571	76	49.97	1387831525	28358585	57735	175062628	110755421	0.25	0.14	0.64	0.48	53.11	99.8	6.7	4.24	86.19	2.87	72	33.08	2613057301	3128275672	75041944	864442395	3		0866V012611	IGTB866	IGTB866	TRUE	0.987528	FLU	2011-01-26	08:04:00	M	21	Caucasian
0330V121511_FLU	Flu	13	25225362	95.11	44445236	35776816	80.5	2160	26521511	74.13	25634689	1947387985	1884550491	76	49.88	1026365928	21778705	43443	148735722	101423465	0.27	0.11	0.48	0.48	50.95	99.8	7.38	5.03	85.57	2.01	63.4	34.62	2014447692	2719038016	40562416	697388227	4		0330V121511	IGTB330	IGTB330	TRUE	0.987707	FLU	2011-12-15	08:43:00	F	22	Caucasian
0670V081111_FLU	Flu	13	40152726	97.99	55012276	48676892	88.48	197	40976239	84.18	39297602	2985345274	2934622959	76	49.97	1606923955	33308549	68972	216735986	148490536	0.26	0.12	0.52	0.47	51.63	99.79	6.96	4.77	85	3.27	71.51	33.37	3112556470	3699443792	101770384	1038696261	3		0670V081111	IGTB670	IGTB670	TRUE	0.98776	FLU	2011-08-11	08:15:00	F	25	Caucasian
1135V072711_FLU	Flu	13	24401312	95.4	38280334	31560388	82.45	1726	25578170	81.05	24585707	1867607192	1809835389	76	49.92	1019132247	20970172	37928	137235063	86731922	0.27	0.13	0.54	0.48	52.46	99.82	7.06	4.46	85.84	2.64	69.53	33.38	1942785581	2398589488	51193144	648529247	4		1135V072711	IGTB1135	IGTB1135	TRUE	0.987761	FLU	2011-07-27	07:50:00	M	46	African-American
1111V031511_FLU	Flu	13	35712608	97.62	50418906	45026112	89.3	176	36582521	81.25	35136034	2669361564	2623329445	76	49.96	1463119650	30138168	58514	182374391	114625086	0.25	0.13	0.6	0.47	52.65	99.81	6.56	4.12	86.35	2.96	70.12	33.7	2778952287	3421984512	82330192	936543618	3		1111V031511	IGTB1111	IGTB1111	TRUE	0.98786	FLU	2011-03-15	08:05:00	M	46	African-American
1375V071211_FLU	Flu	13	30639036	95.47	49769204	41065492	82.51	2178	32094045	78.15	30888181	2346641678	2272970244	76	49.92	1318941637	26938680	43047	160257944	89738490	0.27	0.1	0.48	0.49	54.1	99.84	6.57	3.68	87.16	2.59	68.09	33.06	2438043463	3120977392	63072552	806065536	4		1375V071211	IGTB1375	IGTB1375	TRUE	0.98806	FLU	2011-07-12	07:53:00	F	23	Caucasian
1130V011911_FLU	Flu	13	36071012	97.76	48253112	43250362	89.63	163	36897373	85.31	35337446	2684518105	2636617216	76	49.96	1482605281	30285044	61244	193431762	116411236	0.25	0.13	0.6	0.47	52.9	99.8	6.9	4.15	85.74	3.21	73.11	32.84	2802699419	3287027512	89932016	920374828	3		1130V011911	IGTB1130	IGTB1130	TRUE	0.988078	FLU	2011-01-19	08:20:00	F	40	East Asian
1467V121411_FLU	Flu	13	27114446	94.9	45033568	36331886	80.68	2085	28570888	78.64	27374022	2079502698	2010793905	76	49.87	1119170679	23049777	45910	159148281	107830648	0.26	0.12	0.52	0.48	51.57	99.8	7.33	4.97	84.68	3.02	66.55	33.11	2170154219	2761223336	65577056	718476112	4		1467V121411	IGTB1467	IGTB1467	TRUE	0.9881	FLU	2011-12-14	08:03:00	F	25	Caucasian
0119V052510_FLU	Flu	13	33352410	94.83	56030856	46659954	83.28	2521	35170270	75.38	33807112	2568294373	2482134982	76	49.93	1376457695	28780249	55674	198643321	130365318	0.28	0.1	0.43	0.49	51.53	99.81	7.44	4.88	85.2	2.48	64.19	33.68	2671413304	3546156504	66270784	899718287	4		0119V052510	IGTB119	IGTB119	TRUE	0.988171	FLU	2010-05-25	08:13:00	F	30	African-American
1380V101911_IFN	IFNB1	13	31948470	97.51	39024098	35335576	90.55	395	32765761	92.73	31477995	2391384991	2342903860	76	49.97	1376540840	27587739	41222	140631169	84856947	0.27	0.13	0.59	0.47	55.31	99.85	5.65	3.41	88.05	2.89	81.61	32.74	2488991513	2685503776	72012432	814991493	2		1380V101911	IGTB1380	IGTB1380	TRUE	0.988177	IFN	2011-10-19	08:26:00	M	19	Caucasian
1165V041211_FLU	Flu	13	40383358	97.72	56057938	49616072	88.51	187	41326072	83.29	39867753	3028731226	2972601395	76	49.97	1668271368	34287816	62274	207713974	129668166	0.26	0.15	0.67	0.46	53.14	99.82	6.62	4.13	86.88	2.37	72.33	33.74	3139153317	3770821472	74548856	1058993058	3		1165V041211	IGTB1165	IGTB1165	TRUE	0.988217	FLU	2011-04-12	08:16:00	M	46	Caucasian
1156V061511_FLU	Flu	13	29696362	97.1	41896578	36482128	87.08	38	30581743	83.83	29256222	2222623284	2175366662	76	49.95	1236478638	25041823	45358	160512651	105457874	0.25	0.13	0.64	0.47	53.23	99.82	6.91	4.54	85.4	3.15	71.55	32.17	2323080564	2772641728	73291816	747383030	5		1156V061511	IGTB1156	IGTB1156	TRUE	0.988267	FLU	2011-06-15	07:50:00	F	44	African-American
1292V060211_IFN	IFNB1	13	27086232	96.43	40837840	35356832	86.58	18	28087670	79.44	27167070	2064029356	2013309144	76	49.94	1191368486	23843600	32034	123136478	81354088	0.27	0.13	0.56	0.47	55.83	99.87	5.77	3.81	88.39	2.02	70.19	32.56	2133793447	2687119232	43207216	694748325	1		1292V060211	IGTB1292	IGTB1292	TRUE	0.988305	IFN	2011-06-02	08:21:00	F	23	East Asian
1294V121411_FLU	Flu	13	30922814	95.53	51275270	41593708	81.12	2349	32370393	77.83	31229478	2372496830	2297629812	76	49.91	1363542049	27387337	43565	134136194	100327826	0.26	0.09	0.48	0.5	55.45	99.84	5.46	4.08	88.3	2.17	68.68	32.84	2458847859	3161121808	53357472	807515004	4		1294V121411	IGTB1294	IGTB1294	TRUE	0.988379	FLU	2011-12-14	08:45:00	F	19	Caucasian
1447V100611_FLU	Flu	13	32819784	95.22	54216264	44334870	81.77	2369	34466297	77.74	33288515	2528748008	2445839763	76	49.9	1399216688	28884309	49329	166124272	116416343	0.26	0.11	0.49	0.48	53.45	99.83	6.35	4.45	87.15	2.06	67.71	33.7	2617933863	3369450120	53992680	882222183	4		1447V100611	IGTB1447	IGTB1447	TRUE	0.988382	FLU	2011-10-06	08:01:00	F	25	Caucasian
1575V120711_FLU	Flu	13	39523518	95.3	67867776	54685518	80.58	3385	41470598	75.83	40034409	3041249474	2945469266	76	49.89	1636991935	33931252	64387	228458148	146124545	0.26	0.12	0.52	0.48	51.97	99.81	7.25	4.64	85.51	2.6	64.81	33.54	3150035833	4156099368	81919184	1056599006	4		1575V120711	IGTB1575	IGTB1575	TRUE	0.988384	FLU	2011-12-07	08:28:00	F	25	Caucasian
0697V120611_FLU	Flu	13	28625342	95.82	46252384	38069072	82.31	2000	29874361	78.47	28818158	2189440571	2122535929	76	49.92	1194483069	24892049	44186	153323617	93800269	0.26	0.11	0.52	0.48	52.63	99.82	6.76	4.13	86.82	2.29	68.1	34.19	2269462855	2893249472	51995552	775885372	4		0697V120611	IGTB697	IGTB697	TRUE	0.988413	FLU	2011-12-06	08:59:00	F	49	Caucasian
1505V121511_FLU	Flu	13	39567212	95.37	68952994	55257374	80.14	2870	41489652	75.08	40226181	3056109921	2962940462	76	49.87	1619060595	34207252	66958	222315102	150784020	0.26	0.11	0.46	0.49	51.37	99.8	7.05	4.78	86.11	2.06	64.62	34.73	3151729727	4199560424	64862960	1094739163	4		1505V121511	IGTB1505	IGTB1505	TRUE	0.988426	FLU	2011-12-15	08:17:00	F	21	Caucasian
1166V041211_baseline	Baseline	13	47044524	97.44	58292324	51561452	88.45	1102	48281719	93.64	46420218	3526493469	3456537812	76	49.97	1997991749	39954291	75771	278942438	147570024	0.25	0.11	0.5	0.48	54.48	99.81	7.61	4.02	86.11	2.26	80.6	31.64	3667619279	3918670352	82903688	1160263342	6		1166V041211	IGTB1166	IGTB1166	TRUE	0.988476	baseline	2011-04-12	07:47:00	F	41	African-American
0506V080911_FLU	Flu	13	36823846	97.9	48617186	43397332	89.26	175	37614458	86.67	36103797	2741008823	2694517208	76	49.98	1510811118	30750043	67923	198257087	124187969	0.25	0.14	0.64	0.48	52.91	99.78	6.94	4.35	85.62	3.09	74.12	32.71	2855283363	3298197232	88282816	933882783	3		0506V080911	IGTB506	IGTB506	TRUE	0.98851	FLU	2011-08-09	07:46:00	F	28	Caucasian
1317V091311_FLU	Flu	13	30890054	97.25	42450590	37172858	87.57	28	31764841	85.45	30459739	2313603474	2262532483	76	49.95	1320719842	26346743	44813	156269978	89003568	0.24	0.14	0.63	0.49	54.74	99.83	6.48	3.69	86.82	3.01	74.14	32.08	2412517294	2825137208	72707224	773885230	5		1317V091311	IGTB1317	IGTB1317	TRUE	0.988517	FLU	2011-12-14	08:48:00	M	19	East Asian
0529V031011_FLU	Flu	13	33549400	97.87	48077514	42556352	88.52	192	34279850	80.55	32887145	2498293148	2457004502	76	49.97	1341249144	27893669	57838	175164431	119532000	0.25	0.14	0.63	0.47	51.51	99.79	6.73	4.59	85.25	3.44	68.63	33.74	2603753495	3234282752	89465224	878408816	3		0529V031011	IGTB529	IGTB529	TRUE	0.988578	FLU	2011-03-10	08:24:00	M	52	Caucasian
1195V110311_FLU	Flu	13	35293590	96.85	49742170	43633822	87.72	40	36442945	83.52	35164737	2671415722	2610012396	76	49.94	1463541477	29948532	63015	180564132	137531813	0.25	0.12	0.56	0.47	52.87	99.79	6.52	4.97	85.72	2.79	71.56	32.85	2768307824	3316170472	77238040	909485559	5		1195V110311	IGTB1195	IGTB1195	TRUE	0.988595	FLU	2011-11-03	07:49:00	F	26	Caucasian
0775V121511_IFN	IFNB1	13	44153290	97.7	52848498	48280810	91.36	510	45194991	93.61	43594718	3311882743	3244731334	76	49.98	1935382541	38275014	55907	192712501	134088171	0.27	0.13	0.59	0.47	56.37	99.85	5.61	3.91	88.16	2.33	82.48	31.78	3433155668	3669341560	79905792	1091115355	2		0775V121511	IGTB775	IGTB775	TRUE	0.98862	IFN	2011-12-15	08:22:00	F	28	Caucasian
1433V080211_FLU	Flu	13	27384416	95.23	42052104	35025834	83.29	1904	28755432	82.1	27624469	2098441348	2031593406	76	49.93	1163723573	23837147	40024	153776149	85781959	0.28	0.12	0.51	0.48	53.28	99.83	7.04	3.93	86.57	2.46	71.03	33.29	2184120350	2661963384	53788088	727090969	4		1433V080211	IGTB1433	IGTB1433	TRUE	0.988649	FLU	2011-08-02	08:16:00	M	51	African-American
1438V081111_IFN	IFNB1	13	36132626	96.24	55702906	47975720	86.13	15	37542923	78.25	36270771	2755357015	2685099581	76	49.94	1565146125	31166762	57410	192436251	127174633	0.27	0.13	0.59	0.47	54.88	99.82	6.75	4.46	86.73	2.07	67.83	31.84	2851752365	3646154720	58898176	908135271	1		1438V081111	IGTB1438	IGTB1438	TRUE	0.988657	IFN	2011-08-11	08:09:00	F	22	East Asian
1394V082511_FLU	Flu	13	30767836	97.57	40436382	36310442	89.8	806	31534186	86.85	30464986	2314394561	2272414631	76	49.98	1277321663	26039689	50508	153797655	109371015	0.25	0.11	0.54	0.49	53.32	99.81	6.42	4.57	86.42	2.6	75.01	33.09	2395426727	2759593592	62256008	792719376	6		1394V082511	IGTB1394	IGTB1394	TRUE	0.988662	FLU	2011-08-25	07:43:00	M	37	Caucasian
1166V041211_IFN	IFNB1	13	31425374	96.07	48579144	41568776	85.57	23	32712485	78.69	31619104	2402246046	2342757401	76	49.93	1383448199	27720523	43069	146195494	94362255	0.28	0.14	0.6	0.46	55.67	99.84	5.88	3.8	88.4	1.92	69.54	32.73	2485112716	3159226976	47657472	813472381	1		1166V041211	IGTB1166	IGTB1166	TRUE	0.988667	IFN	2011-04-12	07:47:00	F	41	African-American
0668V062311_FLU	Flu	13	38654046	97.01	54236230	48064678	88.62	47	39846018	82.9	38366474	2914716300	2854393593	76	49.95	1620289736	32808666	58981	208782766	129565429	0.24	0.15	0.69	0.46	53.53	99.82	6.9	4.28	86.05	2.78	71.3	32.51	3026826399	3652915528	84088072	984148421	5		0668V062311	IGTB668	IGTB668	TRUE	0.9887	FLU	2011-06-23	07:30:00	M	47	Caucasian
0863V113011_FLU	Flu	13	38835292	95.03	66183668	54520960	82.38	3044	40865691	74.95	39358207	2990092658	2891982674	76	49.86	1598448035	33357980	66138	220405959	145375645	0.26	0.11	0.53	0.48	51.49	99.8	7.1	4.68	85.34	2.88	63.94	33.85	3104347586	4143592960	89406400	1050763929	4		0863V113011	IGTB863	IGTB863	TRUE	0.988815	FLU	2011-11-30	08:37:00	F	21	Caucasian
1385V072011_baseline	Baseline	13	45332518	97.89	54214804	48806994	90.03	1058	46307337	94.88	44023159	3344188726	3285798515	76	49.99	1812103939	36890215	71089	323132745	140303465	0.28	0.1	0.43	0.48	51.52	99.81	9.19	3.99	83.14	3.69	78.83	31.62	3517383205	3709331544	129862112	1112075893	6		1385V072011	IGTB1385	IGTB1385	TRUE	0.988876	baseline	2011-07-20	07:34:00	M	30	Caucasian
1302V101911_FLU	Flu	13	24839660	95.29	39105380	32254490	82.48	1750	26066677	80.82	25170771	1912233435	1849555514	76	49.89	1040017588	21399371	42268	138220532	95245149	0.27	0.12	0.54	0.48	52.52	99.8	6.98	4.81	85.99	2.22	69.46	33.47	1980085508	2451341240	43894560	662735656	4		1302V101911	IGTB1302	IGTB1302	TRUE	0.988947	FLU	2011-10-19	08:31:00	M	19	Caucasian
1586V112211_FLU	Flu	13	33137254	95.35	54015578	43348274	80.25	2385	34753016	80.17	33467183	2542236776	2462234368	76	49.92	1393767642	28680316	47905	215925304	94895515	0.27	0.11	0.52	0.48	52.8	99.83	8.18	3.6	85.77	2.46	68.72	32.97	2639569825	3294468824	64878616	870153430	4		1586V112211	IGTB1586	IGTB1586	TRUE	0.988953	FLU	2011-11-22	07:58:00	M	25	Caucasian
1587V011712_IFN	IFNB1	13	38558192	98.13	46312854	41225884	89.02	153	39292750	95.31	37814367	2871823005	2823411769	76	49.97	1657710334	32879994	60797	178083175	125385045	0.27	0.12	0.53	0.48	55.56	99.82	5.97	4.2	87.15	2.68	83	31.59	2983796225	3133167184	80000336	942701575	3		1587V011712	IGTB1587	IGTB1587	TRUE	0.988975	IFN	2012-01-17	08:15:00	F	20	Caucasian
0641V101811_IFN	IFNB1	13	47827188	97.76	57615862	52001556	90.26	613	48922143	94.08	47031944	3572986594	3499701580	76	49.98	2070479128	41375175	57777	227673401	116638975	0.28	0.13	0.55	0.46	55.71	99.86	6.13	3.14	88.03	2.71	82.77	32.31	3716209907	3952118256	100693768	1200784416	2		0641V101811	IGTB641	IGTB641	TRUE	0.988976	IFN	2011-10-18	08:16:00	M	49	Caucasian
1248V121311_IFN	IFNB1	13	29552476	97.58	35976706	32459384	90.22	412	30286409	93.31	29244237	2221492342	2176012153	76	49.97	1286104075	25545366	40769	140125001	82824715	0.27	0.13	0.61	0.47	55.91	99.84	6.09	3.6	88.03	2.28	82.09	32.13	2300438655	2466913184	52394704	739030155	2		1248V121311	IGTB1248	IGTB1248	TRUE	0.989061	IFN	2011-12-13	08:07:00	F	19	Caucasian
1156V061511_IFN	IFNB1	13	38902794	97.71	47011524	42483754	90.37	488	39813069	93.71	38299441	2909464823	2850560919	76	49.98	1692509542	33434875	52646	180236227	117089044	0.27	0.13	0.57	0.47	55.97	99.84	5.96	3.87	87.49	2.68	81.95	31.53	3024165325	3228765304	81016608	953369728	2		1156V061511	IGTB1156	IGTB1156	TRUE	0.989069	IFN	2011-06-15	07:50:00	F	44	African-American
1193V042111_baseline	Baseline	13	39855354	97.44	49092690	43808822	89.24	909	40903892	93.37	39193428	2977249855	2916394654	76	49.97	1670885391	33683890	69701	227125767	127462812	0.26	0.1	0.46	0.48	53.78	99.79	7.31	4.1	85.61	2.98	79.89	31.83	3106914808	3329470472	92550824	988960626	6		1193V042111	IGTB1193	IGTB1193	TRUE	0.989143	baseline	2011-04-21	07:55:00	M	41	Caucasian
0668V062311_IFN	IFNB1	13	53243344	97.75	63821392	58173976	91.15	693	54467863	93.63	52687039	4002258036	3923873874	76	49.97	2293898855	45458812	75449	267871064	169306457	0.26	0.12	0.54	0.48	55.45	99.83	6.47	4.09	87.21	2.23	81.6	31.76	4137189808	4421222176	92225088	1313960765	2		0668V062311	IGTB668	IGTB668	TRUE	0.989167	IFN	2011-06-23	07:30:00	M	47	Caucasian
1203V042011_IFN	IFNB1	13	41446414	96.46	62130842	53290908	85.77	19	42967968	80.63	41341363	3140798412	3064922606	76	49.93	1834683486	37067951	48438	156369658	92620464	0.29	0.11	0.5	0.47	56.21	99.87	4.79	2.84	89.85	2.52	72.42	33.64	3264206716	4050109008	82362568	1098212544	1		1203V042011	IGTB1203	IGTB1203	TRUE	0.989172	IFN	2011-04-20	08:03:00	F	22	Caucasian
1601V112211_FLU	Flu	13	36815760	95.48	58033268	47944888	82.62	2634	38559797	80.43	37211501	2826986091	2736893395	76	49.92	1544683094	31998241	53617	199062175	127529215	0.26	0.1	0.47	0.49	52.74	99.83	6.8	4.35	87.01	1.85	69.94	34.27	2929099879	3643811488	54054088	1003801481	4		1601V112211	IGTB1601	IGTB1601	TRUE	0.989249	FLU	2011-11-22	08:23:00	F	21	African-American
1140V033011_FLU	Flu	13	31526306	97.7	44077046	39550854	89.73	160	32267038	81.58	31041029	2358157364	2318116578	76	49.97	1277949770	26619840	54524	170990197	101317180	0.26	0.13	0.63	0.47	52.14	99.8	6.98	4.13	86.14	2.76	70.23	33.99	2450953901	3005864904	67551536	833183263	3		1140V033011	IGTB1140	IGTB1140	TRUE	0.989284	FLU	2011-03-30	08:05:00	M	42	Caucasian
1320V060211_FLU	Flu	13	32469346	97.1	44716596	39057928	87.35	37	33439585	85.62	32242802	2449561318	2399474873	76	49.96	1358079932	27800883	46931	159542374	106683046	0.25	0.12	0.57	0.47	53.46	99.83	6.28	4.2	86.95	2.58	74.4	33.48	2540241892	2968402528	65414720	850558472	5		1320V060211	IGTB1320	IGTB1320	TRUE	0.989291	FLU	2011-06-02	08:04:00	M	25	Caucasian
0940V030211_FLU	Flu	13	34476022	97.56	48208538	43273238	89.76	215	35339507	81.67	33837082	2570538608	2526179728	76	49.96	1344805934	29355983	46649	178212066	91354603	0.33	0.11	0.37	0.49	50.1	99.84	6.64	3.4	87.08	2.88	71.08	36.99	2684388073	3288766088	77224512	992838692	3		0940V030211	IGTB940	IGTB940	TRUE	0.989334	FLU	2011-03-02	08:09:00	M	24	African-American
1565V022812_FLU	Flu	13	22819188	94.96	37537104	30578958	81.46	1663	24031251	78.59	23137447	1757687396	1697868545	76	49.92	972543192	19995707	34892	118599589	72727639	0.27	0.12	0.52	0.48	53.28	99.83	6.5	3.98	87.02	2.5	68.35	33.74	1825331913	2324000808	45619456	615872422	4		1565V022812	IGTB1565	IGTB1565	TRUE	0.989334	FLU	2012-02-28	08:15:00	M	24	Caucasian
1418V080911_IFN	IFNB1	13	35319884	96.26	53562030	46591286	86.99	12	36692378	78.75	35474621	2695106153	2626509214	76	49.93	1536853563	30776948	55206	172219690	117618900	0.27	0.13	0.57	0.47	55.14	99.82	6.18	4.22	87.59	2.01	68.95	32.45	2787351572	3540937736	56087848	904598012	1		1418V080911	IGTB1418	IGTB1418	TRUE	0.989361	IFN	2011-08-09	07:55:00	F	25	Caucasian
0920V011911_FLU	Flu	13	34958842	97.6	51384616	45480572	88.51	195	35818596	78.76	34482108	2619437811	2572603907	76	49.96	1416363175	29158648	59492	192540196	121302615	0.25	0.12	0.57	0.48	52.06	99.8	7.08	4.46	84.93	3.54	66.85	32.87	2720548569	3456523472	96177240	894235987	3		0920V011911	IGTB920	IGTB920	TRUE	0.989421	FLU	2011-04-21	07:42:00	M	41	Caucasian
1523V113011_IFN	IFNB1	13	40466638	98.08	48899980	43516484	88.99	191	41260113	94.81	39660721	3012558857	2959905197	76	49.98	1709813184	34086386	56495	223297194	124872766	0.28	0.12	0.53	0.48	54.56	99.83	7.13	3.98	86.05	2.84	81.54	31.49	3133752806	3307252784	88955416	986889325	3		1523V113011	IGTB1523	IGTB1523	TRUE	0.98943	IFN	2011-11-30	07:47:00	F	22	Caucasian
1205V111511_FLU	Flu	13	33850616	97	45660110	40042906	87.7	33	34896328	87.15	33652696	2556575215	2499983442	76	49.96	1464636387	29455787	48688	149677350	104933087	0.26	0.14	0.6	0.47	55.25	99.84	5.65	3.96	87.91	2.48	76.57	32.66	2650782353	3043260856	65858408	865720280	5		1205V111511	IGTB1205	IGTB1205	TRUE	0.989479	FLU	2011-11-15	08:48:00	F	23	East Asian
1698V022812_FLU	Flu	13	36881860	94.87	61630550	49128978	79.72	2934	38875703	79.13	37411001	2842149615	2752460546	76	49.91	1552333560	32083623	55199	200125139	126063262	0.26	0.12	0.54	0.48	52.57	99.83	6.78	4.27	86.47	2.49	68.39	33.9	2953141839	3733802328	73540032	1001121880	4		1698V022812	IGTB1698	IGTB1698	TRUE	0.989501	FLU	2012-02-28	07:53:00	M	20	African-American
1293V101911_IFN	IFNB1	13	50303548	97.61	60865970	55330316	90.91	648	51535349	93.14	49556931	3764592506	3686134556	76	49.98	2178786957	43268594	68833	243237937	136349272	0.27	0.15	0.59	0.46	55.66	99.84	6.21	3.48	87.6	2.7	81.55	31.94	3914485665	4205104016	105826808	1250356356	2		1293V101911	IGTB1293	IGTB1293	TRUE	0.989514	IFN	2011-10-19	08:14:00	F	19	African-American
1156V061511_baseline	Baseline	13	47755974	97.23	60232890	53168808	88.27	1143	49115293	92.38	46700615	3547734545	3475919246	76	49.98	1994031554	39722383	78851	285824022	174470097	0.26	0.12	0.52	0.47	53.45	99.8	7.66	4.68	84.09	3.57	77.64	30.64	3730829023	4040829408	133312208	1143280028	6		1156V061511	IGTB1156	IGTB1156	TRUE	0.989518	baseline	2011-06-15	07:50:00	F	44	African-American
1487V121411_FLU	Flu	13	56887798	95.11	94139350	74907668	79.57	4247	59812852	79.85	57597762	4375440277	4235182324	76	49.88	2411835141	49207361	89483	305303380	211175303	0.27	0.11	0.52	0.48	53.09	99.82	6.72	4.65	86.16	2.47	68.76	33.08	4543168334	5692982768	112206400	1502728724	4		1487V121411	IGTB1487	IGTB1487	TRUE	0.989582	FLU	2011-12-14	08:35:00	F	29	Caucasian
1372V062911_IFN	IFNB1	13	35699560	96.36	54810666	47115494	85.96	23	37049824	78.64	35760249	2716742892	2651210445	76	49.94	1536468209	30878572	51909	173311726	121141922	0.28	0.13	0.56	0.47	54.59	99.83	6.16	4.3	87.26	2.28	68.59	32.67	2814520666	3580777544	64200544	919433664	1		1372V062911	IGTB1372	IGTB1372	TRUE	0.98961	IFN	2011-06-29	08:08:00	F	18	Caucasian
0612V021611_IFN	IFNB1	13	37542694	96.02	58219730	50142662	86.13	15	39099831	77.98	37702246	2862430699	2791059554	76	49.94	1639017345	32800604	54953	178469166	120675028	0.28	0.14	0.61	0.46	55.22	99.83	6.01	4.07	87.65	2.27	68.27	32.43	2968180512	3810842312	67489824	962640488	1		0612V021611	IGTB612	IGTB612	TRUE	0.989616	IFN	2011-02-16	08:21:00	F	21	Caucasian
1274V102611_IFN	IFNB1	13	44720392	97.66	54135342	48772142	90.09	571	45791119	93.89	44087609	3349398133	3280332088	76	49.98	1936630070	38862106	60142	198883681	112866828	0.28	0.14	0.61	0.47	55.68	99.85	5.72	3.24	88.5	2.54	83.05	32.82	3478451412	3706682792	88402136	1141718010	2		1274V102611	IGTB1274	IGTB1274	TRUE	0.989655	IFN	2011-10-26	08:31:00	M	19	Caucasian
1406V111511_FLU	Flu	13	32996556	96.5	46919318	41596248	88.65	52	34194002	82.2	33022165	2508861743	2457805852	76	49.95	1382457990	28215759	49629	162710892	118326527	0.25	0.11	0.53	0.48	53.22	99.82	6.26	4.56	86.43	2.75	71.02	33.22	2597663445	3161314848	71383152	862823592	5		1406V111511	IGTB1406	IGTB1406	TRUE	0.989661	FLU	2011-11-15	08:18:00	F	22	Caucasian
1162V040711_FLU	Flu	13	33014698	97.62	48855342	43233044	88.49	205	33819414	78.23	32391472	2460569170	2418618957	76	49.97	1326435632	27684819	54589	197444077	102926398	0.26	0.13	0.59	0.48	51.64	99.8	7.69	4.01	85.54	2.77	66.87	33.9	2568693401	3285711344	71218688	870721571	3		1162V040711	IGTB1162	IGTB1162	TRUE	0.989673	FLU	2011-08-18	08:03:00	F	28	African-American
1344V062811_IFN	IFNB1	13	34157500	96.37	51643086	44953460	87.05	18	35442650	78.84	34084169	2589471614	2523553548	76	49.93	1469470444	29615113	44466	166271900	109670750	0.27	0.11	0.49	0.47	54.58	99.85	6.18	4.07	87	2.75	68.56	32.42	2692456187	3416462960	74079328	873005741	1		1344V062811	IGTB1344	IGTB1344	TRUE	0.989684	IFN	2011-06-28	07:39:00	M	19	Caucasian
1674V011812_FLU	Flu	13	34501248	95.02	57163604	46727474	81.74	2577	36309792	77.71	34933565	2654009291	2571670369	76	49.9	1409337833	29682463	52301	200723062	137881883	0.27	0.09	0.41	0.5	51.09	99.82	7.28	5	85.47	2.26	66.39	34.37	2758384635	3551288024	62289296	948184465	4		1674V011812	IGTB1674	IGTB1674	TRUE	0.989715	FLU	2012-01-18	07:52:00	F	24	African-American
1130V011911_IFN	IFNB1	13	28523074	96.06	43777032	37729612	86.19	19	29691682	78.7	28648401	2176569318	2123136695	76	49.92	1258371957	25262739	36986	126492354	74411084	0.28	0.12	0.53	0.46	55.79	99.85	5.61	3.3	88.83	2.26	69.88	33.04	2255670614	2867450512	51083704	745334301	1		1130V011911	IGTB1130	IGTB1130	TRUE	0.989739	IFN	2011-01-19	08:20:00	F	40	East Asian
1008V101911_IFN	IFNB1	13	33477622	97.46	41001206	37218396	90.77	480	34349645	92.29	32998338	2506796957	2455472421	76	49.97	1434352895	28840444	47903	150551370	88885022	0.28	0.14	0.59	0.46	54.97	99.83	5.77	3.41	88.06	2.77	81.23	33.08	2609195136	2828598096	72264752	863187024	2		1008V101911	IGTB1008	IGTB1008	TRUE	0.989752	IFN	2011-10-19	07:57:00	M	52	African-American
0529V031011_IFN	IFNB1	13	27319672	96.37	41562006	35957452	86.52	14	28349775	78.84	27389220	2080898720	2030271483	76	49.94	1202390699	24278801	33837	114285683	72842006	0.28	0.13	0.54	0.46	55.83	99.86	5.31	3.38	89.19	2.12	70.29	33.36	2153688706	2732766352	45701536	718492011	1		0529V031011	IGTB529	IGTB529	TRUE	0.989802	IFN	2011-03-10	08:24:00	M	52	Caucasian
1317V091311_IFN	IFNB1	13	33104786	96.3	50425712	43667280	86.6	12	34375602	78.72	33215450	2523020611	2463101204	76	49.95	1440294175	29244236	41977	158383285	81333826	0.31	0.1	0.43	0.48	55.16	99.86	6.07	3.12	88.78	2.04	69.84	33.61	2610902031	3318713280	53311112	877626762	1		1317V091311	IGTB1317	IGTB1317	TRUE	0.989893	IFN	2011-12-14	08:48:00	M	19	East Asian
1523V113011_baseline	Baseline	13	40796696	97.34	50012366	44863134	89.7	960	41913261	93.42	40105794	3046406364	2986873410	76	50	1626094928	34307133	60907	253097784	120088333	0.29	0.09	0.35	0.5	51.08	99.82	7.95	3.77	85.3	2.98	79.64	34.22	3183419609	3409598184	94947864	1089270263	6		1523V113011	IGTB1523	IGTB1523	TRUE	0.989898	baseline	2011-11-30	07:47:00	F	22	Caucasian
1435V120111_IFN	IFNB1	13	35821778	98.09	43051716	38398444	89.19	152	36519667	95.11	35226099	2676079276	2630256607	76	49.98	1483872882	29779072	59921	196711010	137468602	0.27	0.11	0.49	0.48	53.49	99.8	7.09	4.96	85.44	2.51	81.22	31.96	2774125693	2918281744	69641232	886472692	3		1435V120111	IGTB1435	IGTB1435	TRUE	0.98991	IFN	2011-12-01	08:27:00	M	23	Caucasian
1198V042011_FLU	Flu	13	32073038	97.07	44961556	39350338	87.52	55	33040065	83.96	31728631	2410054164	2357949045	76	49.96	1367479820	27390475	44959	176961964	92664790	0.25	0.13	0.6	0.48	54.49	99.84	7.05	3.69	86.45	2.81	72.54	31.96	2509510276	2990625688	70462032	802001248	5		1198V042011	IGTB1198	IGTB1198	TRUE	0.989942	FLU	2011-04-20	08:20:00	F	20	Caucasian
1505V121511_IFN	IFNB1	13	36635362	97.52	44606766	40408034	90.59	472	37567811	92.97	36285852	2756709696	2697117533	76	49.96	1609255775	31908655	48057	154071388	111122774	0.26	0.13	0.58	0.47	56.39	99.85	5.4	3.89	88.48	2.23	82.23	32.09	2853842778	3071010584	63516240	915912768	2		1505V121511	IGTB1505	IGTB1505	TRUE	0.989978	IFN	2011-12-15	08:17:00	F	21	Caucasian
0775V121511_FLU	Flu	13	25062348	95.87	40274378	33241360	82.54	1789	26141033	78.64	25253565	1918491121	1861088294	76	49.93	1047327244	21653392	43620	130076371	96022209	0.26	0.12	0.55	0.48	52.74	99.8	6.55	4.84	86.49	2.13	67.98	33.74	1985694401	2526343360	42266640	670027420	4		0775V121511	IGTB775	IGTB775	TRUE	0.990017	FLU	2011-12-15	08:22:00	F	28	Caucasian
1140V033011_IFN	IFNB1	13	30956878	96.11	47894766	40786150	85.16	24	32211509	78.98	31168506	2367920386	2307612706	76	49.95	1359839952	27189544	45529	141644464	96949774	0.27	0.15	0.63	0.46	55.57	99.83	5.79	3.96	88.31	1.94	69.71	32.74	2446923873	3099747400	47463824	801052229	1		1140V033011	IGTB1140	IGTB1140	TRUE	0.990058	IFN	2011-03-30	08:05:00	M	42	Caucasian
1488V121411_IFN	IFNB1	13	47779866	97.51	58195236	52431286	90.1	623	48997904	93.45	47300156	3593427392	3517202338	76	49.98	2090598895	41131816	69016	216089408	158388241	0.26	0.13	0.58	0.47	56.17	99.83	5.81	4.26	87.53	2.41	81.76	31.37	3722041989	3984777736	89535296	1167484321	2		1488V121411	IGTB1488	IGTB1488	TRUE	0.990114	IFN	2011-12-14	08:15:00	F	20	Caucasian
1370V101311_FLU	Flu	13	38110514	95.6	63136580	51028864	80.82	2745	39864569	78.12	38576624	2930803362	2841488116	76	49.91	1579823802	33204114	60096	186687934	143184237	0.26	0.1	0.5	0.48	52.17	99.82	6.16	4.73	87.02	2.08	67.95	34.85	3028289870	3878193664	63136696	1055488159	4		1370V101311	IGTB1370	IGTB1370	TRUE	0.990122	FLU	2011-10-13	08:25:00	M	43	Caucasian
1197V041211_IFN	IFNB1	13	25633394	96.12	40156172	34048032	84.79	20	26667261	78.32	25666128	1949573601	1898597210	76	49.94	1135583836	22571093	32927	119337721	69861872	0.28	0.14	0.56	0.47	56.07	99.85	5.89	3.45	88.27	2.39	69.09	32.21	2025471709	2587650432	48407744	652318222	1		1197V041211	IGTB1197	IGTB1197	TRUE	0.990151	IFN	2011-04-12	08:00:00	M	22	Caucasian
1488V121411_FLU	Flu	13	34402004	95.27	57086810	46360308	81.21	2513	36111800	77.89	34810815	2644465584	2560586290	76	49.9	1428276077	29829025	54055	186521031	124507445	0.27	0.1	0.49	0.49	52.07	99.82	6.8	4.54	86.28	2.38	67.17	34.21	2742909395	3523383408	65272752	938379726	4		1488V121411	IGTB1488	IGTB1488	TRUE	0.990157	FLU	2011-12-14	08:15:00	F	20	Caucasian
1565V022812_IFN	IFNB1	13	53804656	97.66	64791864	58661874	90.54	668	55092453	93.92	53059499	4031010418	3947410630	76	49.98	2304400393	45826719	71748	285454267	161999314	0.27	0.12	0.53	0.48	55.06	99.84	6.82	3.87	86.72	2.59	81.4	31.66	4184970873	4458302424	108373872	1324810459	2		1565V022812	IGTB1565	IGTB1565	TRUE	0.990172	IFN	2012-02-28	08:15:00	M	24	Caucasian
1466V011812_IFN	IFNB1	13	32578466	97.71	40409130	35647986	88.22	131	33340999	93.53	32226647	2448063635	2402856495	76	49.96	1413547395	28130621	43624	155089744	101913054	0.27	0.13	0.56	0.46	55.82	99.85	6.12	4.02	87.72	2.13	82	31.91	2532464285	2709246936	53936896	808015102	3		1466V011812	IGTB1466	IGTB1466	TRUE	0.99018	IFN	2012-01-18	08:15:00	M	19	Caucasian
0536V081011_IFN	IFNB1	13	39010944	96.4	58559126	50309802	85.91	19	40468941	80.44	39210698	2978575777	2904772791	76	49.95	1691260970	33887512	64756	192184600	136362176	0.28	0.13	0.53	0.47	55.02	99.81	6.25	4.44	87.36	1.95	70.23	32.34	3073869639	3823544952	59913384	994190296	1		0536V081011	IGTB536	IGTB536	TRUE	0.990253	IFN	2011-08-10	07:35:00	M	24	Caucasian
1597V120611_IFN	IFNB1	13	46605258	97.56	56580600	51375310	90.8	618	47773096	92.99	46056554	3498679788	3427126392	76	49.96	2015790863	40602840	57671	219485949	120366817	0.28	0.13	0.6	0.46	55.55	99.86	6.05	3.32	88.43	2.21	82.18	32.88	3628800170	3904523560	80113272	1193096670	2		1597V120611	IGTB1597	IGTB1597	TRUE	0.990299	IFN	2011-12-06	07:52:00	F	23	Caucasian
1502V120811_FLU	Flu	13	50392026	95.63	80928136	67416924	83.3	3751	52692822	78.16	50998299	3874232213	3760063304	76	49.91	2088851440	43560041	88707	280971610	189865994	0.25	0.09	0.46	0.5	52.19	99.8	7.02	4.74	86.3	1.94	67.42	34.11	4002518666	5123686224	77512552	1365365496	4		1502V120811	IGTB1502	IGTB1502	TRUE	0.990315	FLU	2011-12-08	08:39:00	F	22	Caucasian
1434V081811_FLU	Flu	13	43184904	97.9	56959666	51278222	90.03	180	44113227	86.03	42588706	3234758302	3180705835	76	49.97	1777465340	36383648	75271	232860192	144602871	0.25	0.11	0.51	0.49	53.06	99.79	6.95	4.32	86.2	2.54	74.1	33.14	3350144787	3897144872	85088840	1110209567	3		1434V081811	IGTB1434	IGTB1434	TRUE	0.990317	FLU	2011-08-18	07:45:00	F	23	African-American
0627V101311_IFN	IFNB1	13	34989570	97.43	42849488	38777430	90.5	411	35911607	92.61	34515585	2622062497	2564151697	76	49.97	1518919407	30295966	41970	168760464	84023203	0.27	0.13	0.58	0.47	55.68	99.86	6.19	3.08	88.07	2.66	81.52	32.39	2727854341	2947084680	72659040	883543054	2		0627V101311	IGTB627	IGTB627	TRUE	0.990318	IFN	2011-10-13	07:51:00	M	32	Caucasian
1523V113011_FLU	Flu	13	24582728	95.43	40238428	32738058	81.36	1667	25760420	78.69	24805470	1884409225	1827004193	76	49.92	1032591416	21286186	37433	132233789	87900178	0.25	0.11	0.48	0.49	52.77	99.82	6.76	4.49	86.21	2.55	67.8	33.43	1956756421	2488092408	49829856	654231150	4		1523V113011	IGTB1523	IGTB1523	TRUE	0.990329	FLU	2011-11-30	07:47:00	F	22	Caucasian
1138V031711_FLU	Flu	13	29192738	97.67	41009410	36352426	88.64	141	29889744	82.22	28770945	2185507469	2146863377	76	49.97	1200474139	24528806	50122	157203454	107922722	0.26	0.15	0.65	0.47	52.88	99.8	6.92	4.75	85.71	2.62	70.43	32.83	2270233985	2762784376	59420600	745259873	3		1138V031711	IGTB1138	IGTB1138	TRUE	0.990333	FLU	2011-03-17	07:43:00	F	22	East Asian
1148V090811_FLU	Flu	13	33151538	97.06	45568838	39879710	87.52	53	34157433	85.65	32829526	2493766377	2440731219	76	49.97	1412985101	28346381	50349	171651339	107080833	0.26	0.15	0.66	0.47	54.46	99.82	6.62	4.13	86.6	2.66	74.13	32.13	2594322240	3030857960	69015904	833646308	5		1148V090811	IGTB1148	IGTB1148	TRUE	0.990334	FLU	2011-09-08	07:58:00	F	23	African-American
1148V090811_baseline	Baseline	13	43449258	97.65	52866226	47781086	90.38	1012	44493755	93.12	42601349	3236455654	3175380658	76	50	1839424432	36678539	73188	249387951	134205093	0.26	0.12	0.52	0.47	54.42	99.8	7.38	3.97	85.86	2.79	79.91	31.44	3379895303	3631362536	94451736	1062480737	6		1148V090811	IGTB1148	IGTB1148	TRUE	0.990345	baseline	2011-09-08	07:58:00	F	23	African-American
1245V082311_FLU	Flu	13	53016030	97.88	69286110	61932862	89.39	209	54163060	87.45	52264735	3969249718	3898468420	76	49.97	2180384896	44581321	95472	284441732	185723046	0.25	0.1	0.49	0.49	53.01	99.79	6.92	4.52	85.86	2.71	75.03	32.85	4112946492	4706897512	111443512	1351085050	3		1245V082311	IGTB1245	IGTB1245	TRUE	0.990362	FLU	2011-05-11	08:04:00	M	43	Caucasian
0930V062911_baseline	Baseline	13	78791194	97.36	99117796	87452144	88.23	1885	80925786	92.54	77299862	5872372496	5759243675	76	49.98	3261044665	65797216	124740	495895589	256045340	0.26	0.11	0.5	0.47	53.05	99.81	8.07	4.17	84.56	3.21	78.22	31.52	6147339252	6646362944	197038360	1937441402	6		0930V062911	IGTB930	IGTB930	TRUE	0.990373	baseline	2011-06-29	07:45:00	M	32	Caucasian
0231V060711_FLU	Flu	13	36852214	97.29	50345934	44393868	88.18	41	37877038	85.32	36555430	2777211942	2721257772	76	49.96	1529422230	31339939	54866	193539130	126328309	0.26	0.12	0.54	0.48	53.15	99.83	6.73	4.39	86.41	2.48	73.69	33.25	2877327172	3373933968	71237688	956835872	5		0231V060711	IGTB231	IGTB231	TRUE	0.990374	FLU	2011-06-07	07:39:00	M	26	Caucasian
1603V120711_FLU	Flu	13	29026910	95.79	47247758	38393542	81.26	2145	30301110	78.92	29335420	2228728735	2159597130	76	49.92	1205213238	25317759	45163	154693961	100174979	0.27	0.1	0.44	0.49	52.36	99.82	6.72	4.35	87	1.93	68.63	34.64	2301911946	2917909192	44440696	797410587	4		1603V120711	IGTB1603	IGTB1603	TRUE	0.990377	FLU	2011-12-07	08:41:00	M	27	African-American
1192V051811_FLU	Flu	13	33975880	97.13	47618980	41501388	87.15	38	34980415	84.29	33608111	2553178960	2499457678	76	49.96	1457798824	29317799	48107	163268285	102305226	0.26	0.13	0.6	0.48	54.86	99.84	6.14	3.85	87.33	2.67	73.58	32.47	2657185596	3154105488	71010144	862849487	5		1192V051811	IGTB1192	IGTB1192	TRUE	0.990378	FLU	2011-05-18	07:45:00	F	42	African-American
1475V013112_FLU	Flu	13	35885634	96.91	53109982	47373984	89.2	60	37029982	78.17	35724640	2713992013	2660591654	76	49.96	1479770399	30553799	59085	201704925	126038796	0.25	0.13	0.64	0.47	52.61	99.81	7.17	4.48	85.87	2.48	67.09	33.26	2812798964	3600422784	69705376	935623557	5		1475V013112	IGTB1475	IGTB1475	TRUE	0.990417	FLU	2012-01-31	08:27:00	M	24	Caucasian
1200V041311_IFN	IFNB1	13	36411576	96.13	56070292	47505860	84.73	14	37877167	79.73	36553487	2776926653	2704500662	76	49.94	1594186888	32214766	45939	167855208	105806580	0.28	0.12	0.53	0.47	55.41	99.86	5.83	3.68	88.35	2.14	70.41	32.94	2877234206	3610445360	61671264	947751539	1		1200V041311	IGTB1200	IGTB1200	TRUE	0.990444	IFN	2011-04-13	08:23:00	M	42	African-American
1250V083011_FLU	Flu	13	54038000	97.85	72851234	65322236	89.67	264	55222595	84.54	52992512	4025383968	3956351284	76	49.97	2208432905	44832701	87710	292061909	184041514	0.25	0.13	0.61	0.47	52.65	99.8	6.96	4.39	85.36	3.29	72.12	32.71	4194333349	4964489936	138020256	1371888067	3		1250V083011	IGTB1250	IGTB1250	TRUE	0.990468	FLU	2011-05-17	07:37:00	M	35	Caucasian
1335V060111_baseline	Baseline	13	39817338	97.55	48759414	43538986	89.29	883	40816543	93.75	38964486	2960120742	2900246995	76	49.99	1654461237	33189457	60306	241311123	136276872	0.26	0.11	0.5	0.48	53.36	99.82	7.78	4.4	84.43	3.39	79.12	31.08	3100602957	3308962936	105100400	963518085	6		1335V060111	IGTB1335	IGTB1335	TRUE	0.990474	baseline	2011-06-01	08:00:00	M	43	African-American
1650V011012_FLU	Flu	13	23538474	95.06	38025296	31183788	82.01	1833	24762214	79.41	23878207	1813900433	1759385823	76	49.91	1007806444	20657511	33955	117879789	86614499	0.26	0.11	0.53	0.49	53.58	99.84	6.27	4.61	86.99	2.14	69.04	33.41	1880797483	2369967888	40176336	628348455	4		1650V011012	IGTB1650	IGTB1650	TRUE	0.990477	FLU	2012-01-10	07:59:00	F	30	Caucasian
1489V101211_IFN	IFNB1	13	49485102	97.49	60032250	54610822	90.97	652	50759715	92.95	49061628	3727222632	3650909089	76	49.98	2139201592	42967575	72970	224752538	132322213	0.27	0.13	0.57	0.47	55.48	99.83	5.83	3.43	88.4	2.34	82.13	32.92	3855919987	4150422472	90298944	1269398195	2		1489V101211	IGTB1489	IGTB1489	TRUE	0.990502	IFN	2011-10-12	08:13:00	M	23	Caucasian
1293V101911_FLU	Flu	13	31059516	95.14	51784068	41603842	80.34	2407	32646642	78.47	31446617	2389148791	2309800152	76	49.91	1289864194	26873031	51435	174567639	110677831	0.27	0.12	0.51	0.48	52.01	99.81	7.04	4.46	86.09	2.41	67.53	34.08	2480058805	3161891992	59707424	845267977	4		1293V101911	IGTB1293	IGTB1293	TRUE	0.990522	FLU	2011-10-19	08:14:00	F	19	African-American
1320V060211_IFN	IFNB1	13	29742132	96.07	46466560	39918586	85.91	13	30958695	77.55	29970185	2277020024	2218504324	76	49.94	1312238685	26332939	40412	134691345	89161179	0.27	0.12	0.51	0.47	55.79	99.85	5.73	3.79	88.73	1.75	68.79	32.94	2351972375	3033812536	41162512	774737187	1		1320V060211	IGTB1320	IGTB1320	TRUE	0.990538	IFN	2011-06-02	08:04:00	M	25	Caucasian
0536V081011_baseline	Baseline	13	42856848	97.49	52312904	46842014	89.54	1005	43960021	93.85	42056354	3194973192	3126834866	76	49.98	1798151455	36109173	68920	245399334	133284244	0.27	0.12	0.49	0.47	53.85	99.81	7.35	3.99	85.52	3.14	80.22	31.67	3339324477	3559993064	104852184	1057702443	6		0536V081011	IGTB536	IGTB536	TRUE	0.990561	baseline	2011-08-10	07:35:00	M	24	Caucasian
0612V021611_FLU	Flu	13	37008934	97.87	49466976	44109446	89.17	177	37812545	85.72	36422395	2766189959	2717231000	76	49.96	1542044044	30898974	72434	194171079	140609226	0.25	0.14	0.64	0.48	53.7	99.77	6.76	4.9	85.68	2.66	73.39	31.98	2871426528	3352317896	76468768	918211593	3		0612V021611	IGTB612	IGTB612	TRUE	0.990562	FLU	2011-02-16	08:21:00	F	21	Caucasian
1417V092911_IFN	IFNB1	13	30871898	96.22	47725454	41115826	86.15	18	32083446	78.03	31002253	2355393606	2294819433	76	49.97	1354387264	27014578	47093	144409879	98824989	0.28	0.13	0.54	0.47	55.57	99.83	5.92	4.05	87.82	2.2	68.5	32.25	2437326255	3124802776	53705704	786026597	1		1417V092911	IGTB1417	IGTB1417	TRUE	0.990607	IFN	2011-09-29	08:12:00	M	50	African-American
0498V013112_IFN	IFNB1	13	39763818	96.53	58785838	50821580	86.45	29	41193396	81.05	39871706	3029369899	2957303078	76	49.96	1735099217	34716985	52393	187636220	127213467	0.27	0.12	0.52	0.46	55.44	99.85	6	4.06	87.94	2	71.26	32.5	3129563397	3862440080	62500576	1017138878	1		0498V013112	IGTB498	IGTB498	TRUE	0.990608	IFN	2012-01-31	08:03:00	F	26	Caucasian
0231V060711_IFN	IFNB1	13	31101066	96.25	47833554	40605958	84.89	20	32313031	79.58	31352206	2381991352	2323033974	76	49.94	1348174009	27078656	49501	152194632	101737114	0.27	0.13	0.56	0.48	54.92	99.82	6.2	4.14	87.88	1.77	69.91	32.96	2454797943	3086052808	43513800	809198912	1		0231V060711	IGTB231	IGTB231	TRUE	0.990612	IFN	2011-06-07	07:39:00	M	26	Caucasian
0469V072811_FLU	Flu	13	29080460	95.82	46169226	37776378	81.82	1994	30348461	80.34	29107074	2211317520	2142238182	76	49.94	1197541335	25118531	40671	152749719	88176306	0.29	0.12	0.46	0.49	51.95	99.84	6.63	3.82	86.72	2.83	69.64	34.78	2305380403	2871004728	65190216	801757508	4		0469V072811	IGTB469	IGTB469	TRUE	0.990623	FLU	2011-07-28	08:15:00	F	30	Caucasian
0707V030911_IFN	IFNB1	13	43700114	96.48	64300794	55881508	86.91	12	45296716	81.06	43829377	3329932010	3250696897	76	49.95	1903109853	38350517	58116	193455273	127537160	0.28	0.11	0.46	0.49	55.3	99.85	5.62	3.71	88.48	2.19	71.69	33.18	3441132064	4246994608	75373152	1141694614	1		0707V030911	IGTB707	IGTB707	TRUE	0.990631	IFN	2011-03-09	08:05:00	M	33	Caucasian
0373V021711_FLU	Flu	13	33108578	97.59	45681078	40692698	89.08	147	33926250	83.37	32564637	2473495490	2427989506	76	49.96	1355076437	27689771	57864	176140350	109588917	0.25	0.13	0.6	0.48	52.59	99.79	6.84	4.25	85.49	3.43	71.22	32.89	2576623020	3092645048	88342096	847550437	3		0373V021711	IGTB373	IGTB373	TRUE	0.990638	FLU	2011-08-11	08:16:00	M	40	Caucasian
0329V101311_FLU	Flu	13	35638364	95.59	55963190	47053434	84.08	2544	37284391	79.24	35968251	2732457571	2650267496	76	49.91	1512307360	31201835	51891	184088198	116229277	0.26	0.11	0.51	0.49	53.4	99.83	6.5	4.1	87.14	2.26	69.01	33.74	2832091265	3576060984	63900800	955603932	4		0329V101311	IGTB329	IGTB329	TRUE	0.990662	FLU	2011-10-13	07:47:00	M	23	Caucasian
1198V042011_IFN	IFNB1	13	31364970	96.17	48588922	41735970	85.9	20	32613753	78.14	31374092	2383576438	2324824554	76	49.94	1379640503	27500236	38456	167633976	61017024	0.27	0.12	0.58	0.47	55.68	99.86	6.77	2.46	88.1	2.67	68.82	32.42	2477640161	3171933720	66217432	803166364	1		1198V042011	IGTB1198	IGTB1198	TRUE	0.990662	IFN	2011-04-20	08:20:00	F	20	Caucasian
1380V101911_FLU	Flu	13	36350598	95.29	56859416	46242138	81.33	2360	38146522	82.49	36742558	2791302347	2703145293	76	49.9	1544430069	31629573	56231	179859860	128163244	0.26	0.12	0.52	0.47	53.3	99.82	6.21	4.42	86.82	2.56	71.58	33.52	2897633646	3514402488	74043304	971181194	4		1380V101911	IGTB1380	IGTB1380	TRUE	0.990662	FLU	2011-10-19	08:26:00	M	19	Caucasian
1424V081811_IFN	IFNB1	13	31249320	96.03	48752276	41140040	84.39	11	32542371	79.1	31396236	2385303279	2324959256	76	49.94	1393578630	27566342	41220	140997722	97364369	0.27	0.16	0.65	0.46	56.37	99.85	5.7	3.94	88.27	2.09	69.79	31.89	2472160213	3126643040	51757672	788487332	1		1424V081811	IGTB1424	IGTB1424	TRUE	0.990668	IFN	2011-08-18	07:45:00	F	22	Caucasian
1327V102011_FLU	Flu	13	29092556	95.32	46560638	38030850	81.68	1989	30522515	80.26	29649732	2252584533	2180703477	76	49.91	1227233234	25310965	48689	160015838	106648109	0.26	0.1	0.43	0.49	52.93	99.81	6.9	4.6	86.76	1.74	69.6	33.83	2318633252	2890344600	40328944	784426527	4		1327V102011	IGTB1327	IGTB1327	TRUE	0.99071	FLU	2011-10-20	08:09:00	M	19	Caucasian
1639V011812_IFN	IFNB1	13	39597412	97.97	47990488	42791594	89.17	149	40418065	94.45	38712120	2940216190	2888987608	76	49.97	1658780965	33044147	57852	226251891	130346295	0.27	0.12	0.54	0.47	54.04	99.83	7.37	4.25	85.13	3.26	80.35	31.09	3069456218	3252161144	99926928	954251204	3		1639V011812	IGTB1639	IGTB1639	TRUE	0.990718	IFN	2012-01-18	08:28:00	M	22	Caucasian
1424V081811_FLU	Flu	13	29507320	97.12	41638464	36358068	87.32	35	30383858	83.57	29193457	2217839275	2168289674	76	49.96	1237447404	24996770	43759	149393752	111409001	0.25	0.13	0.58	0.47	53.62	99.83	6.47	4.83	85.78	2.92	71.65	32.17	2308006554	2763213168	67342688	742455477	5		1424V081811	IGTB1424	IGTB1424	TRUE	0.990723	FLU	2011-08-18	07:45:00	F	22	Caucasian
1300V090711_FLU	Flu	13	34931472	97.69	46874306	41815780	89.21	155	35757610	85.51	34391475	2611915928	2564913306	76	49.97	1466420472	29414232	64054	190052694	129038197	0.25	0.13	0.59	0.48	54	99.78	7	4.75	85.86	2.39	73.36	31.86	2715361843	3177999280	64920264	864998933	3		1300V090711	IGTB1300	IGTB1300	TRUE	0.990727	FLU	2011-09-07	08:20:00	F	19	African-American
1475V013112_IFN	IFNB1	13	36613270	96.22	56797316	48028112	84.56	37	38053146	79.23	36875306	2801586184	2731613279	76	49.95	1623521357	32301262	49192	172088826	113166219	0.27	0.12	0.53	0.47	56.16	99.85	5.95	3.91	88.34	1.8	69.96	32.18	2890798393	3650136512	51908760	930139837	1		1475V013112	IGTB1475	IGTB1475	TRUE	0.990761	IFN	2012-01-31	08:27:00	M	24	Caucasian
1489V101211_FLU	Flu	13	33341582	95.19	57788972	47308414	81.86	2589	35026851	74.04	33979843	2581399008	2495577370	76	49.9	1392809637	29236554	52707	180110187	118997078	0.26	0.12	0.52	0.48	52.35	99.82	6.77	4.47	87.06	1.7	64.43	34.71	2660645030	3595439464	45176224	923578147	4		1489V101211	IGTB1489	IGTB1489	TRUE	0.99077	FLU	2011-10-12	08:13:00	M	23	Caucasian
0619V011812_FLU	Flu	13	32710106	95.4	54736824	44721122	81.7	2586	34287571	76.67	33055236	2511248449	2431561255	76	49.91	1333855471	27941684	57180	188000895	135858171	0.27	0.1	0.42	0.49	51.21	99.8	7.22	5.22	85.2	2.37	65.29	33.98	2604520307	3398805272	61761856	885079569	4		0619V011812	IGTB619	IGTB619	TRUE	0.990774	FLU	2012-01-18	08:45:00	F	21	Caucasian
0731V012412_FLU	Flu	13	50933522	97.44	69797250	61689414	88.38	56	52272563	84.74	50617428	3845601803	3767761736	76	49.97	2081793937	42842907	78412	268128166	192345911	0.26	0.12	0.53	0.48	52.43	99.82	6.75	4.84	85.85	2.55	72.72	33.43	3970941151	4688395464	101305264	1327423458	5		0731V012412	IGTB731	IGTB731	TRUE	0.990776	FLU	2012-01-24	NA	F	28	Caucasian
1483V092811_IFN	IFNB1	13	34352054	96.34	51552408	44918098	87.13	14	35658499	79.39	34605108	2629032878	2565480833	76	49.95	1494600832	29990368	48645	155293916	119346374	0.27	0.11	0.52	0.47	55.17	99.84	5.73	4.41	88.09	1.77	69.9	32.92	2708865708	3413775448	48018320	891634343	1		1483V092811	IGTB1483	IGTB1483	TRUE	0.990782	IFN	2011-09-28	07:49:00	M	20	Caucasian
1335V060111_IFN	IFNB1	13	30087806	96.22	46486008	40105342	86.27	24	31268396	77.97	30044111	2282549284	2225179043	76	49.94	1299515171	25930841	42450	155268588	108096670	0.28	0.13	0.56	0.46	54.71	99.84	6.54	4.55	86.2	2.71	67.18	31.5	2375377276	3048005992	64379752	748151513	1		1335V060111	IGTB1335	IGTB1335	TRUE	0.990786	IFN	2011-06-01	08:00:00	M	43	African-American
0494V031011_FLU	Flu	13	35640766	97.31	57085926	50815954	89.02	206	36624260	72.07	35251761	2677907038	2630580653	76	49.97	1409215196	29166716	89797	205910249	201190362	0.25	0.14	0.65	0.48	50.66	99.69	7.4	7.23	82.85	2.52	59.67	32.19	2781814915	3862012504	70137664	895412446	3		0494V031011	IGTB494	IGTB494	TRUE	0.990787	FLU	2011-03-10	08:11:00	F	25	Caucasian
1245V082311_IFN	IFNB1	13	34604618	96.33	53679888	45508792	84.78	40	35922062	78.93	34691122	2635512541	2573594370	76	49.94	1510730156	30297520	44594	165086662	112910098	0.28	0.13	0.58	0.46	55.36	99.85	6.05	4.14	87.71	2.1	69.2	32.35	2728820374	3458668192	57350968	882774349	1		1245V082311	IGTB1245	IGTB1245	TRUE	0.990849	IFN	2011-05-11	08:04:00	M	43	Caucasian
1502V120811_IFN	IFNB1	13	52177482	97.54	63181542	57265410	90.64	689	53495770	93.42	51460639	3909410450	3825270444	76	49.97	2246652593	44994688	68943	244669946	149110938	0.27	0.14	0.6	0.46	55.29	99.85	6.02	3.67	87.66	2.65	81.85	32.37	4063632926	4352171160	107800528	1315466132	2		1502V120811	IGTB1502	IGTB501	FALSE	0.990872	IFN	2011-12-08	08:13:00	F	28	Caucasian
0176V081611_FLU	Flu	13	32754424	97.74	44197608	39397964	89.14	134	33512838	85.06	32282252	2451929268	2407389152	76	49.98	1405087979	28098304	55934	164683474	100543674	0.25	0.15	0.65	0.48	55.21	99.8	6.47	3.95	87.26	2.32	74.17	32.05	2545080170	2994245264	59168280	815650414	3		0176V081611	IGTB176	IGTB176	TRUE	0.990891	FLU	2011-08-16	08:14:00	M	22	Caucasian
0917V031711_IFN	IFNB1	13	36970144	96.42	55381886	47199086	85.22	13	38342349	81.24	37057785	2815361207	2745507360	76	49.95	1629840187	32752471	45821	159928947	100925886	0.28	0.12	0.52	0.47	55.96	99.86	5.49	3.47	88.92	2.12	72.2	32.97	2912669758	3587130536	61800008	960208923	1		0917V031711	IGTB917	IGTB917	TRUE	0.990904	IFN	2011-03-17	07:43:00	F	28	Caucasian
0575V081111_FLU	Flu	13	27320162	97.14	38344650	33612592	87.66	30	28124630	83.67	27159269	2063390933	2018888852	76	49.96	1129240789	23097533	45227	151744611	97242668	0.25	0.12	0.55	0.48	52.85	99.8	7.1	4.55	85.74	2.61	71.71	32.89	2136526582	2554556992	55688240	702641842	5		0575V081111	IGTB575	IGTB575	TRUE	0.990911	FLU	2011-08-11	07:55:00	F	27	Caucasian
1274V102611_FLU	Flu	13	40891176	95.36	67334330	54151176	80.42	2999	42879764	79.19	41524310	3154776051	3050793343	76	49.9	1742164311	36141927	60954	194369725	135263012	0.27	0.09	0.44	0.5	53.49	99.83	5.97	4.15	88.05	1.83	69.69	34.57	3257288904	4115489376	59609232	1125911428	4		1274V102611	IGTB1274	IGTB1274	TRUE	0.990975	FLU	2011-10-26	08:31:00	M	19	Caucasian
1242V110311_FLU	Flu	13	40869676	96.65	59789672	51960870	86.91	58	42286888	81.38	40713720	3092894281	3019991909	76	49.95	1702066725	34562877	64377	230437574	151436050	0.24	0.13	0.65	0.47	52.99	99.81	7.17	4.71	85.34	2.77	69.42	32.35	3212050355	3949026120	88968640	1039198853	5		1242V110311	IGTB1242	IGTB1242	TRUE	0.990986	FLU	2011-11-03	08:34:00	F	21	Caucasian
1577V111711_FLU	Flu	13	35223790	95.31	56902432	46784032	82.22	2423	36955465	78.99	35677373	2710447712	2625733346	76	49.89	1485285953	30744586	57934	176378484	113765449	0.26	0.1	0.49	0.48	52.91	99.81	6.28	4.05	87.33	2.34	68.95	34.42	2807240746	3555586432	65645912	966200761	4		1577V111711	IGTB1577	IGTB1577	TRUE	0.991046	FLU	2011-11-17	07:47:00	M	50	Caucasian
0627V101311_FLU	Flu	13	39967938	95.69	65122466	52751466	81	2843	41766044	79.18	40146311	3050105450	2956529391	76	49.89	1646253407	34276297	61439	240050359	132044276	0.27	0.1	0.45	0.48	51.89	99.82	7.57	4.16	85.62	2.65	67.76	33.74	3172802275	4009111416	84086552	1070406943	4		0627V101311	IGTB627	IGTB627	TRUE	0.991059	FLU	2011-10-13	07:51:00	M	32	Caucasian
0619V011812_IFN	IFNB1	13	45300212	97.93	55005090	48994260	89.07	222	46256232	94.41	44455402	3377034594	3316083502	76	49.97	1760107070	38804099	58401	227473252	113689185	0.42	0.1	0.28	0.51	50.1	99.85	6.47	3.24	87.69	2.6	82.74	37.59	3513403015	3723563760	91440160	1320756682	3		0619V011812	IGTB619	IGTB619	TRUE	0.991069	IFN	2012-01-18	08:45:00	F	21	Caucasian
1406V111511_IFN	IFNB1	13	44939860	97.5	54909728	49816312	90.72	665	46089838	92.52	44367860	3370442358	3302459592	76	49.96	1922265791	38635405	59966	214618638	137734524	0.27	0.14	0.59	0.46	54.91	99.85	6.13	3.93	87.39	2.55	80.81	32.48	3500968913	3786039712	89211840	1137200254	2		1406V111511	IGTB1406	IGTB1406	TRUE	0.991079	IFN	2011-11-15	08:18:00	F	22	Caucasian
1202V051711_FLU	Flu	13	33251392	95.18	57795044	47394580	82	2537	34936310	73.71	33612810	2553623646	2469736189	76	49.9	1347974371	28613729	58053	203884619	132661718	0.27	0.1	0.47	0.49	50.79	99.8	7.68	5	85.36	1.96	62.89	34.57	2653851384	3601988080	51966064	917390795	4		1202V051711	IGTB1202	IGTB1202	TRUE	0.9911	FLU	2011-05-17	07:59:00	M	47	African-American
1192V051811_IFN	IFNB1	13	40299782	96.32	61095704	52465822	85.87	25	41841525	79.75	40523069	3078680707	3002542890	76	49.94	1814894177	36183377	52950	172675033	88128930	0.27	0.13	0.54	0.46	57.1	99.85	5.43	2.77	90.07	1.73	71.8	32.97	3178629672	3987402472	54991776	1047966325	1		1192V051811	IGTB1192	IGTB1192	TRUE	0.99112	IFN	2011-05-18	07:45:00	F	42	African-American
1136V081011_IFN	IFNB1	13	33134982	96.14	51282714	44223894	86.24	18	34465466	77.93	33238811	2525064502	2462028776	76	49.94	1450816649	29019416	43598	161630893	105359168	0.27	0.14	0.59	0.46	55.42	99.85	6.17	4.02	87.74	2.06	68.35	32.33	2618032054	3361015944	53896768	846360811	1		1136V081011	IGTB1136	IGTB1136	TRUE	0.991152	IFN	2011-08-10	08:03:00	F	22	African-American
0256V071211_FLU	Flu	13	35917550	95.33	57667290	47297246	82.02	2627	37676749	79.66	36403460	2765461956	2676925822	76	49.91	1539998354	31374177	50956	192440116	117878376	0.26	0.11	0.52	0.49	53.81	99.84	6.72	4.12	86.94	2.22	69.22	33.13	2861942395	3594590696	63590416	948077895	4		0256V071211	IGTB256	IGTB256	TRUE	0.991167	FLU	2011-07-12	08:24:00	F	22	Caucasian
0178V031011_FLU	Flu	13	40106000	97.92	56522774	50542956	89.42	190	40959101	81.04	39336247	2986804894	2936447113	76	49.97	1623310733	33101337	76521	235329546	138331199	0.24	0.14	0.67	0.49	52.2	99.77	7.57	4.45	84.56	3.43	68.45	32.36	3109659537	3841264656	106699288	1006137301	3		0178V031011	IGTB178	IGTB178	TRUE	0.991196	FLU	2011-03-10	07:40:00	F	51	Caucasian
1037V090711_IFN	IFNB1	13	37228372	96.17	57659972	48773326	84.59	20	38711665	79.37	37426658	2843501275	2773565024	76	49.93	1618634417	32582175	53365	161050572	126019036	0.27	0.13	0.57	0.46	55.04	99.84	5.48	4.29	88.22	2.02	69.99	33.18	2940888305	3706772776	59370440	975841899	1		1037V090711	IGTB1037	IGTB1037	TRUE	0.9912	IFN	2011-09-07	08:06:00	M	20	African-American
1305V053111_IFN	IFNB1	13	25272694	96.13	39136006	33527674	85.67	26	26289331	78.41	25269974	1919860201	1872104370	76	49.91	1087130198	21699236	34814	133187813	96413747	0.29	0.13	0.58	0.46	54.43	99.84	6.67	4.83	86.01	2.5	67.41	31.57	1997144737	2548103224	49922272	630516932	1		1305V053111	IGTB1305	IGTB1305	TRUE	0.991206	IFN	2011-05-31	08:02:00	M	23	Caucasian
1227V051211_FLU	Flu	13	35384252	94.92	57840182	47681284	82.44	2412	37276773	78.18	36057534	2739253400	2650690808	76	49.91	1461685986	30829140	55598	189559118	132226366	0.26	0.08	0.38	0.5	51.62	99.82	6.69	4.67	86.75	1.88	67.79	35.13	2831521763	3623777584	53291200	994791424	4		1227V051211	IGTB1227	IGTB1227	TRUE	0.991216	FLU	2011-05-12	07:57:00	F	18	Caucasian
0506V080911_IFN	IFNB1	13	34087450	96.34	51737154	44142492	85.32	23	35381054	80.15	34076993	2588745351	2527584462	76	49.92	1481376058	29647225	44980	165493682	111837688	0.28	0.13	0.58	0.46	55.12	99.85	6.16	4.16	87.25	2.44	69.89	32.13	2687556172	3354829392	65442232	863448186	1		0506V080911	IGTB506	IGTB506	TRUE	0.991219	IFN	2011-08-09	07:46:00	F	28	Caucasian
1255V111711_FLU	Flu	13	30377438	94.95	51008670	41156932	80.69	2486	31992883	77.73	30859005	2344271831	2268816205	76	49.9	1283725552	26600604	45618	158856863	104103845	0.26	0.11	0.48	0.48	52.83	99.83	6.54	4.28	87	2.18	67.59	34.17	2430083817	3127926832	53042832	830389612	4		1255V111711	IGTB1255	IGTB1255	TRUE	0.991219	FLU	2011-11-17	08:14:00	M	20	Caucasian
1327V102011_IFN	IFNB1	13	39510356	97.58	48071980	43583302	90.66	551	40490202	92.9	39028486	2964861955	2903920116	76	49.98	1724775999	34463504	49394	178280056	101043972	0.28	0.15	0.64	0.46	56.08	99.86	5.8	3.29	88.53	2.39	82.2	32.45	3075572614	3312330952	73551888	997966649	2		1327V102011	IGTB1327	IGTB1327	TRUE	0.991236	IFN	2011-10-20	08:09:00	M	19	Caucasian
1197V041211_FLU	Flu	13	38055184	97.67	52471316	46174614	88	182	38963917	84.38	37499433	2848677348	2797512799	76	49.97	1575458414	32053645	57834	201775251	126249620	0.26	0.14	0.62	0.47	53.23	99.82	6.82	4.27	86.01	2.91	72.54	32.78	2959630572	3509270664	86011328	970193093	3		1197V041211	IGTB1197	IGTB1197	TRUE	0.991292	FLU	2011-04-12	08:00:00	M	22	Caucasian
1312V011812_FLU	Flu	13	38603694	95.24	66783458	53827456	80.6	2907	40533628	75.3	39154840	2974642406	2880552576	76	49.91	1574709648	33213792	63743	224790419	153329375	0.26	0.1	0.44	0.49	51.15	99.81	7.3	4.98	85.53	2.19	64.37	34.39	3078890168	4090886656	67349680	1058750073	4		1312V011812	IGTB1312	IGTB1312	TRUE	0.991312	FLU	2012-01-18	08:29:00	F	20	Caucasian
1111V031511_IFN	IFNB1	13	35047700	96.32	52128926	45586496	87.45	20	36388516	79.82	35120472	2668165145	2604896537	76	49.93	1538412718	31091206	40318	152906802	96268226	0.27	0.13	0.59	0.46	55.65	99.87	5.53	3.48	88.93	2.06	70.95	33.27	2764247857	3464573696	56921720	919768547	1		1111V031511	IGTB1111	IGTB1111	TRUE	0.99132	IFN	2011-03-15	08:05:00	M	46	African-American
1603V120711_IFN	IFNB1	13	34616848	97.6	41961870	37909946	90.34	458	35467625	93.56	34227164	2600330743	2546502612	76	49.98	1511375452	30172244	43107	160824954	85973330	0.28	0.15	0.62	0.47	56.09	99.86	5.97	3.19	88.52	2.32	82.78	32.43	2694367506	2881155896	62507112	873721917	2		1603V120711	IGTB1603	IGTB1603	TRUE	0.991321	IFN	2011-12-07	08:41:00	M	27	African-American
1265V022212_FLU	Flu	13	30892952	95.53	51049482	41698270	81.68	2294	32337800	77.55	31122143	2364232002	2291906380	76	49.92	1305051706	26817568	46277	162724441	95755266	0.26	0.12	0.5	0.49	53.13	99.83	6.62	3.9	86.8	2.68	67.28	33.67	2456334583	3169068520	65817824	827027803	4		1265V022212	IGTB1265	IGTB1265	TRUE	0.991326	FLU	2012-02-22	08:27:00	M	20	Caucasian
1572V112311_FLU	Flu	13	35090724	95.2	57476560	47170214	82.07	2567	36860460	78.14	35604849	2705017649	2617219176	76	49.9	1468844147	30523600	55292	194885195	122748814	0.25	0.11	0.5	0.49	52.46	99.82	6.96	4.38	86.48	2.18	67.55	34.02	2800078413	3584936264	60956712	952674446	4		1572V112311	IGTB1572	IGTB1572	TRUE	0.99133	FLU	2011-11-23	08:48:00	M	24	Caucasian
0373V021711_baseline	Baseline	13	42204726	97.57	51009482	46064698	90.31	970	43256831	93.9	41767818	3172766097	3115450323	76	49.98	1766112863	35813741	71287	262927636	126289929	0.25	0.08	0.36	0.51	53.75	99.8	8	3.84	86.18	1.98	80.88	32.42	3285569134	3500917048	64961000	1065334061	6		0373V021711	IGTB373	IGTB373	TRUE	0.991331	baseline	2011-08-11	08:16:00	M	40	Caucasian
0565V030111_FLU	Flu	13	36682972	97.8	50659950	44644562	88.13	191	37510054	84.02	35828458	2721188602	2673647570	76	49.97	1504032450	30406273	68436	196663639	135729623	0.24	0.15	0.65	0.49	52.8	99.78	6.9	4.76	84.8	3.53	71.19	32	2848532759	3392986712	100631752	911579211	3		0565V030111	IGTB565	IGTB565	TRUE	0.991335	FLU	2011-03-01	07:57:00	F	30	Caucasian
1556V112311_FLU	Flu	13	33593318	95.07	54518420	44432916	81.5	2292	35337102	79.53	34068279	2588108207	2505421603	76	49.91	1443573721	29498580	52539	170722523	111498423	0.26	0.12	0.51	0.49	53.78	99.82	6.36	4.15	87.16	2.32	69.29	33.38	2684230481	3376901616	62346296	896127782	4		1556V112311	IGTB1556	IGTB1556	TRUE	0.991355	FLU	2011-11-23	08:58:00	F	30	Caucasian
0695V060711_IFN	IFNB1	13	34322422	96.1	54183644	45727368	84.39	37	35713970	78.1	34558484	2625530683	2558570499	76	49.93	1521997470	30363640	44116	155418998	106860590	0.28	0.14	0.6	0.46	56.1	99.85	5.73	3.94	88.38	1.95	69	32.28	2713128238	3475279968	53004072	875873821	1		0695V060711	IGTB695	IGTB695	TRUE	0.991372	IFN	2011-06-07	07:58:00	M	38	Caucasian
1008V101911_FLU	Flu	13	22729388	95.4	37738994	30861504	81.78	1622	23826322	77.2	22961666	1744382777	1687769091	76	49.89	930117122	19698405	41270	124366284	82168204	0.27	0.11	0.49	0.48	51.39	99.79	6.87	4.54	86.37	2.22	66.65	34.98	1809841818	2345474304	40106720	633106507	4		1008V101911	IGTB1008	IGTB1008	TRUE	0.991382	FLU	2011-10-19	07:57:00	M	52	African-American
1114V042011_IFN	IFNB1	13	40832688	97.43	50205798	45159380	89.95	527	41909140	92.8	40356987	3065984445	3001545394	76	49.97	1814555273	36063603	46398	161735998	93424299	0.27	0.15	0.67	0.46	57	99.87	5.08	2.93	89.49	2.5	83.01	32.49	3183617238	3432112880	79509376	1034435045	2		1114V042011	IGTB1114	IGTB1114	TRUE	0.991384	IFN	2011-01-05	07:51:00	M	48	African-American
1205V111511_IFN	IFNB1	13	31501366	97.42	38580566	34882286	90.41	428	32336374	92.7	31224811	2372105534	2322714320	76	49.97	1402067395	27586948	40448	136233472	84206468	0.26	0.15	0.65	0.47	57.08	99.85	5.55	3.43	88.81	2.22	82.28	31.73	2456308819	2651053736	54516624	779319541	2		1205V111511	IGTB1205	IGTB1205	TRUE	0.991405	IFN	2011-11-15	08:48:00	F	23	East Asian
0565V030111_IFN	IFNB1	13	41024540	96.18	64227566	54033968	84.13	50	42652506	78.94	41032502	3116804989	3038862123	76	49.94	1792012224	35831525	58957	194264171	122459753	0.28	0.14	0.56	0.47	55.32	99.84	6	3.78	87.78	2.45	69.24	32.46	3239562515	4106581568	79376680	1051514054	1		0565V030111	IGTB565	IGTB565	TRUE	0.991432	IFN	2011-03-01	07:57:00	F	30	Caucasian
0707V030911_FLU	Flu	13	39949118	97.9	55443102	49256666	88.84	210	40806730	82.85	39287510	2984680841	2934269643	76	49.97	1619868133	33256912	72525	219360488	151335510	0.25	0.14	0.65	0.47	52.26	99.78	7.08	4.88	85.09	2.96	70.45	32.83	3099738139	3743506616	91616784	1017609090	3		0707V030911	IGTB707	IGTB707	TRUE	0.991466	FLU	2011-03-09	08:05:00	M	33	Caucasian
1575V120711_IFN	IFNB1	13	40871120	97.73	49059732	44460008	90.62	516	41821142	94.06	40366509	3066907536	3003761745	76	49.98	1771742003	35330080	49856	187730056	113895441	0.27	0.13	0.57	0.47	55.76	99.86	5.91	3.58	88.05	2.46	82.79	32.29	3177206331	3378960608	78034216	1025842741	2		1575V120711	IGTB1575	IGTB1575	TRUE	0.991491	IFN	2011-12-07	08:28:00	F	25	Caucasian
0940V030211_IFN	IFNB1	13	29870284	96.3	45999734	39489272	85.85	20	31016862	78.55	29876710	2269781011	2215828552	76	49.93	1310168994	26483471	34672	129954385	79201849	0.27	0.11	0.51	0.47	55.6	99.87	5.52	3.36	88.92	2.21	69.81	33.31	2356237242	3001184672	51964696	784976617	1		0940V030211	IGTB940	IGTB940	TRUE	0.99152	IFN	2011-03-02	08:09:00	M	24	African-American
0945V051911_baseline	Baseline	13	36993458	97.55	44852842	40435112	90.15	824	37920803	93.78	36279230	2755957670	2698905339	76	49.99	1551837979	31079172	60423	219558686	116318655	0.27	0.11	0.47	0.48	53.88	99.81	7.62	4.04	85.36	2.98	80.01	31.49	2880423518	3073068512	85742896	907026742	6		0945V051911	IGTB945	IGTB945	TRUE	0.991521	baseline	2011-05-19	08:05:00	M	20	Caucasian
1088V060911_FLU	Flu	13	32652524	96.81	46455796	40384442	86.93	44	33729357	83.52	32549071	2472738146	2418374011	76	49.95	1405195650	28238380	47818	171948970	103642395	0.25	0.14	0.64	0.47	54.84	99.83	6.71	4.05	87.11	2.13	72.72	32.27	2562156152	3069217592	54645976	826756227	5		1088V060911	IGTB1088	IGTB1088	TRUE	0.991526	FLU	2011-06-09	08:22:00	M	50	African-American
1424V081811_baseline	Baseline	13	36841358	97.21	45896906	40740464	88.77	796	37898062	93.02	36137707	2745243195	2688291928	76	49.98	1553969300	30940295	60040	205433268	125963674	0.25	0.12	0.53	0.47	53.98	99.81	7.14	4.38	85.02	3.47	79.05	31.04	2878705745	3096275264	99900936	893513196	6		1424V081811	IGTB1424	IGTB1424	TRUE	0.991562	baseline	2011-08-18	07:45:00	F	22	Caucasian
0256V071211_IFN	IFNB1	13	50700924	98.06	61562892	54390886	88.35	233	51703760	95.06	49964133	3795743918	3731335666	76	49.96	2154571462	43015636	77653	242412759	193693700	0.27	0.12	0.52	0.47	54.86	99.82	6.17	4.93	86.65	2.25	82.33	31.79	3927624865	4133707336	88458832	1248541535	3		0256V071211	IGTB256	IGTB256	TRUE	0.991571	IFN	2011-07-12	08:24:00	F	22	Caucasian
0581V030111_IFN	IFNB1	13	32939226	96.4	49897914	42394300	84.96	15	34167755	80.6	32853818	2495988333	2434948617	76	49.94	1421260772	28529815	43288	158203022	111436213	0.28	0.13	0.54	0.47	54.76	99.85	6.1	4.29	86.87	2.74	69.98	32.11	2595584565	3221966800	71238752	833483459	1		0581V030111	IGTB581	IGTB581	TRUE	0.991597	IFN	2011-03-01	07:39:00	M	29	Caucasian
1385V072011_FLU	Flu	13	34636512	95.44	54136924	44205118	81.65	2376	36292725	82.1	35020411	2660209175	2574925753	76	49.93	1466278735	29765899	52382	211934764	111061363	0.26	0.13	0.57	0.47	53.19	99.82	7.69	4.03	86.03	2.26	70.58	32.83	2756539385	3359588968	62272272	905042331	4		1385V072011	IGTB1385	IGTB1385	TRUE	0.991605	FLU	2011-07-20	07:34:00	M	30	Caucasian
1483V092811_baseline	Baseline	13	51321696	97.66	62345966	55865494	89.61	1200	52553688	94.07	50268000	3818504797	3747192765	76	49.98	2147484181	42987289	94622	290731261	185244661	0.26	0.12	0.52	0.47	53.8	99.78	7.28	4.64	85.06	3.01	79.98	31.27	3991816936	4245777544	120298272	1248150206	6		1483V092811	IGTB1483	IGTB1483	TRUE	0.991608	baseline	2011-09-28	07:49:00	M	20	Caucasian
1335V060111_FLU	Flu	13	41876498	97.92	55428308	48829138	88.09	181	42763879	87.58	40944750	3109349374	3055599849	76	49.98	1733426403	35017997	69384	236583235	120804481	0.26	0.14	0.57	0.48	53.38	99.8	7.29	3.72	85.5	3.49	74.81	32.12	3247096840	3711014488	113476208	1042944384	3		1335V060111	IGTB1335	IGTB1335	TRUE	0.991614	FLU	2011-06-01	08:00:00	M	43	African-American
0517V062211_IFN	IFNB1	13	33801004	96.45	49904924	42927048	86.02	22	35043869	81.64	33784070	2566534686	2503292523	76	49.94	1487623453	29524682	44796	161855596	97885067	0.28	0.13	0.52	0.47	55.88	99.85	6.08	3.68	87.89	2.36	71.71	32	2661996572	3262455648	62751984	851918746	1		0517V062211	IGTB517	IGTB517	TRUE	0.991618	IFN	2011-06-22	08:12:00	F	36	Caucasian
1418V080911_FLU	Flu	13	39239400	97.8	52274562	47282928	90.45	159	40120721	84.85	38363806	2914223920	2866253359	76	49.96	1581453121	32716471	61766	207795674	119846909	0.27	0.12	0.54	0.48	51.9	99.81	6.82	3.93	85.68	3.57	72.66	33.79	3047291326	3593502528	108712680	1029562834	3		1418V080911	IGTB1418	IGTB1418	TRUE	0.991625	FLU	2011-08-09	07:55:00	F	25	Caucasian
1265V022212_IFN	IFNB1	13	31955856	98.11	38815504	34268960	88.29	124	32571330	95.05	31190854	2367588263	2327990737	76	49.98	1353924123	26760120	53416	183506809	95550340	0.27	0.13	0.56	0.49	54.77	99.8	7.42	3.87	85.6	3.12	81.25	30.83	2472074818	2604440960	77066280	762172419	3		1265V022212	IGTB1265	IGTB1265	TRUE	0.991626	IFN	2012-02-22	08:27:00	M	20	Caucasian
1698V022812_IFN	IFNB1	13	42734890	98.04	51388922	46007390	89.53	194	43587972	94.74	41872675	3180934649	3127510391	76	49.97	1791632943	35964658	59064	227833492	136359511	0.27	0.12	0.52	0.48	54.11	99.84	6.88	4.12	86.04	2.97	81.47	31.92	3310914008	3496561640	98195192	1056958359	3		1698V022812	IGTB1698	IGTB1698	TRUE	0.991665	IFN	2012-02-28	07:53:00	M	20	African-American
1365V071211_FLU	Flu	13	42360562	95.39	69206624	56642108	81.84	3022	44406696	78.4	42766957	3249076991	3145437830	76	49.92	1789363173	36878866	68494	220125580	139043854	0.27	0.11	0.47	0.49	53.05	99.81	6.53	4.12	86.82	2.53	68.04	33.78	3373295598	4304800208	85346176	1139464695	4		1365V071211	IGTB1365	IGTB1365	TRUE	0.991681	FLU	2011-07-12	08:05:00	F	29	Caucasian
1439V092111_FLU	Flu	13	30156060	97.09	41837688	36751720	87.84	53	31059977	84.51	29990646	2278413984	2229238525	76	49.96	1239983996	25492473	49721	167440808	112946691	0.25	0.13	0.55	0.47	52.56	99.81	7.1	4.79	85.62	2.49	72.33	33.07	2359363037	2793130720	58811080	780214193	5		1439V092111	IGTB1439	IGTB1439	TRUE	0.991691	FLU	2011-09-21	07:58:00	M	24	Caucasian
0498V013112_FLU	Flu	13	34130052	96.65	50717278	44056934	86.87	120	35314017	80.16	33876246	2573689384	2513193137	76	49.94	1399157678	28771797	53353	202245747	118750676	0.25	0.12	0.6	0.47	52.16	99.81	7.54	4.43	84.87	3.17	67.99	32.71	2682586134	3348326984	85059656	877418698	5		0498V013112	IGTB498	IGTB1669	FALSE	0.991725	FLU	2012-01-31	08:14:00	M	19	East Asian
1136V081011_FLU	Flu	13	29588498	97.17	39762576	34876270	87.71	30	30448734	87.31	29208238	2218932256	2173015892	76	49.96	1222939432	25035025	44543	156474479	99716855	0.26	0.13	0.57	0.47	52.87	99.82	6.77	4.31	85.86	3.06	74.92	32.99	2312951058	2650596520	70872888	762992778	5		1136V081011	IGTB1136	IGTB1136	TRUE	0.991728	FLU	2011-08-10	08:03:00	F	22	African-American
0350V081811_FLU	Flu	13	34906696	97.81	49054502	43701240	89.09	206	35687881	81.66	34313287	2606629576	2560998239	76	49.97	1409088249	28865481	61116	202742418	129897106	0.26	0.13	0.58	0.47	51.98	99.79	7.48	4.79	84.63	3.1	69.07	32.65	2710699742	3321294240	84121664	884908790	3		0350V081811	IGTB350	IGTB350	TRUE	0.991743	FLU	2011-08-18	08:25:00	F	29	Caucasian
0945V051911_FLU	Flu	13	39504644	97.17	54823952	47535902	86.71	48	40654915	85.52	39214725	2978989494	2913848073	76	49.96	1658294265	33793186	59691	202302799	125604101	0.26	0.13	0.58	0.48	53.7	99.82	6.55	4.07	86.95	2.43	74.33	33.25	3088031658	3612728552	74990112	1026892450	5		0945V051911	IGTB945	IGTB945	TRUE	0.991749	FLU	2011-04-26	08:05:00	M	42	Caucasian
1305V053111_FLU	Flu	13	35368908	97.78	45859248	41150250	89.73	200	36171787	87.9	34761468	2640562085	2594754841	76	49.96	1453066199	29835161	49808	185621065	112017911	0.27	0.13	0.57	0.48	52.89	99.83	6.76	4.08	86.29	2.88	75.8	33.4	2747357241	3127419000	79187896	917527435	3		1305V053111	IGTB1305	IGTB1305	TRUE	0.991765	FLU	2011-05-31	08:02:00	M	23	Caucasian
0910V021711_FLU	Flu	13	37586006	97.78	53912144	47484232	88.08	182	38440285	80.95	37033473	2812107968	2763421198	76	49.98	1574436130	31582696	65380	218439802	124916513	0.25	0.13	0.64	0.49	53.95	99.79	7.48	4.28	85.62	2.62	69.24	31.67	2918503325	3608801632	76486704	924330934	3		0910V021711	IGTB910	IGTB910	TRUE	0.991812	FLU	2011-07-26	08:05:00	F	21	Caucasian
0176V081611_baseline	Baseline	13	41393682	97.1	51824826	45842314	88.46	958	42630631	92.99	40948994	3110722638	3039093369	76	49.98	1762831923	35067406	73814	235635332	144704921	0.26	0.1	0.48	0.48	54.44	99.79	7.28	4.47	85.71	2.55	79.66	31.27	3238179995	3484015864	82605920	1012462730	6		0176V081611	IGTB176	IGTB176	TRUE	0.991816	baseline	2011-08-16	08:14:00	M	22	Caucasian
0612V021611_baseline	Baseline	13	41512156	97.66	50417254	45328528	89.91	992	42507963	93.78	40870710	3104968469	3047721264	76	49.98	1728410154	34644833	75183	256891134	148650565	0.26	0.1	0.43	0.47	53.53	99.78	7.96	4.6	85	2.44	79.67	31.47	3229050611	3444968128	78947584	1016198529	6		0612V021611	IGTB612	IGTB612	TRUE	0.991824	baseline	2011-02-16	08:21:00	F	21	Caucasian
1372V062911_baseline	Baseline	13	39874970	97.7	48741212	43308378	88.85	902	40813106	94.24	39308853	2986150978	2931127000	76	49.98	1676789705	33695155	65974	230552459	132917985	0.26	0.11	0.44	0.47	54.09	99.8	7.44	4.29	85.89	2.38	80.9	31.81	3100180715	3291436728	73921096	986047490	6		1372V062911	IGTB1372	IGTB1372	TRUE	0.991864	baseline	2011-06-29	08:08:00	F	18	Caucasian
0533V033011_FLU	Flu	13	36772458	97.94	50022888	44619942	89.2	192	37546105	84.15	35955416	2729262942	2683440095	76	49.98	1528506316	30935279	67847	196897692	105780930	0.27	0.14	0.62	0.48	53.64	99.78	6.91	3.71	86.11	3.27	72.36	32.47	2849590586	3391115592	93274496	925303622	3		0533V033011	IGTB533	IGTB533	TRUE	0.991866	FLU	2011-06-21	08:15:00	M	32	Caucasian
1145V051811_IFN	IFNB1	13	31795878	96.15	50045470	42544604	85.01	33	33070751	77.73	31913885	2424654827	2364776067	76	49.94	1379284060	27602904	53069	152125561	106659847	0.27	0.13	0.56	0.47	54.9	99.81	6.06	4.25	87.45	2.25	67.95	32.55	2512333955	3233389904	56482288	817807860	1		1145V051811	IGTB1145	IGTB1145	TRUE	0.991875	IFN	2011-05-18	07:54:00	F	46	African-American
0836V030311_IFN	IFNB1	13	31451518	96.28	47498684	41058450	86.44	18	32665798	79.56	31490020	2392193884	2333084614	76	49.94	1355974950	27189737	53417	144588108	108499197	0.28	0.14	0.57	0.46	54.65	99.8	5.83	4.37	87.44	2.36	69.53	32.79	2481298127	3120442200	58583688	813690392	1		0836V030311	IGTB836	IGTB836	TRUE	0.991909	IFN	2011-03-03	08:10:00	F	23	Caucasian
1088V060911_IFN	IFNB1	13	30755388	96.23	47116500	40404154	85.75	25	31959347	79.1	30875892	2345776136	2287380364	76	49.95	1347082362	26909967	41999	152488700	93488642	0.28	0.12	0.52	0.47	55.48	99.84	6.28	3.85	87.78	2.09	69.4	32.3	2427897774	3070715704	50726048	784138834	1		1088V060911	IGTB1088	IGTB1088	TRUE	0.991917	IFN	2011-06-09	08:22:00	M	50	African-American
0695V060711_FLU	Flu	13	35722054	97.85	46320894	41218876	88.99	151	36508251	88.57	35098648	2666462414	2618614996	76	49.97	1474921843	30229540	58916	162500668	116500772	0.26	0.13	0.57	0.47	53.18	99.81	5.86	4.2	86.76	3.18	76.81	33.58	2773312911	3132634576	88147080	931290951	3		0695V060711	IGTB695	IGTB695	TRUE	0.991927	FLU	2011-06-07	07:58:00	M	38	Caucasian
1396V022212_FLU	Flu	13	39486202	94.86	65619430	53153610	81	2915	41627494	78.32	40187625	3052811802	2955987219	76	49.91	1698691090	34750106	60136	217480734	128497237	0.26	0.12	0.55	0.47	53.73	99.83	6.88	4.06	86.95	2.11	68.05	33.22	3161784319	4039674360	66703376	1050461036	4		1396V022212	IGTB1396	IGTB1396	TRUE	0.991956	FLU	2012-02-22	08:11:00	F	20	Caucasian
1446V062811_FLU	Flu	13	61493422	96.88	87816648	75896824	86.43	129	63471354	83.63	60833444	4621545370	4524342771	76	49.95	2524206771	51792202	94348	342264248	227576264	0.25	0.14	0.59	0.47	52.35	99.82	7.1	4.72	85.13	3.06	71.16	32.77	4821438648	5768158624	147341048	1580137388	5		1446V062811	IGTB1446	IGTB1446	TRUE	0.991977	FLU	2011-06-28	08:14:00	M	21	African-American
0809V082411_FLU	Flu	13	29525564	97.3	41758324	36530910	87.48	33	30343960	83.06	29243012	2221471356	2174311522	76	49.96	1217403735	24912537	47346	156145933	110428948	0.25	0.13	0.59	0.48	52.82	99.81	6.77	4.79	85.65	2.78	71.11	32.83	2304867513	2776349160	64161632	756770971	5		0809V082411	IGTB809	IGTB809	TRUE	0.991981	FLU	2011-08-24	08:17:00	M	29	Caucasian
1439V092111_IFN	IFNB1	13	37079390	96.25	56068212	48345188	86.23	11	38523017	79.68	37222596	2828000123	2755952039	76	49.93	1580801946	32073829	49936	192316204	133801472	0.28	0.1	0.43	0.48	54.02	99.84	6.57	4.57	86.72	2.14	69.07	32.7	2926536095	3674234288	62548152	957098181	1		1439V092111	IGTB1439	IGTB1439	TRUE	0.991982	IFN	2011-09-21	07:58:00	M	24	Caucasian
1242V110311_baseline	Baseline	13	42834870	97.56	53320854	47271804	88.66	1049	43906515	92.88	41863383	3180114739	3120850056	76	49.99	1794067478	35713745	69651	259383064	137335314	0.26	0.11	0.52	0.47	53.79	99.81	7.78	4.12	84.6	3.5	78.54	30.81	3335049554	3592657104	116852432	1027496042	6		1242V110311	IGTB1242	IGTB1242	TRUE	0.991994	baseline	2011-11-03	08:34:00	F	21	Caucasian
0638V121311_IFN	IFNB1	13	44750788	97.69	54010160	49072952	90.86	642	45810281	93.35	44163528	3355117642	3287721346	76	49.96	1958589736	38575041	59576	197622135	137307376	0.25	0.14	0.62	0.47	56.28	99.85	5.68	3.95	87.94	2.44	82.05	31.66	3479970879	3729544352	84919968	1101583941	2		0638V121311	IGTB638	IGTB638	TRUE	0.992002	IFN	2011-12-13	08:40:00	M	21	Caucasian
0330V121511_IFN	IFNB1	13	41405700	97.66	49606762	45037048	90.79	509	42395918	94.14	40953011	3111182947	3046205815	76	49.98	1798742376	35792870	59293	184024983	131177840	0.27	0.12	0.51	0.48	55.85	99.83	5.71	4.07	87.91	2.31	82.71	32.06	3220497186	3422815648	74267960	1032330185	2		0330V121511	IGTB330	IGTB330	TRUE	0.992034	IFN	2011-12-15	08:43:00	F	22	Caucasian
1483V092811_FLU	Flu	13	36366508	96.92	51840084	45707216	88.17	54	37521865	82.09	36044320	2738278641	2682782874	76	49.95	1514276195	30886692	56445	188610338	123073146	0.25	0.13	0.67	0.47	53.13	99.82	6.62	4.32	86.09	2.98	70.64	32.96	2850232895	3473748416	84845184	939479556	5		1483V092811	IGTB1483	IGTB1483	TRUE	0.992053	FLU	2011-09-28	07:49:00	M	20	Caucasian
0940V030211_baseline	Baseline	13	37173288	97.62	45220912	40704122	90.01	882	38078606	93.55	36574985	2778493341	2727354215	76	49.97	1572082488	31787970	56364	213894587	109045782	0.26	0.09	0.41	0.48	54.35	99.82	7.39	3.77	86.77	2.07	81.13	32.42	2892466496	3093513272	59741776	937744999	6		0940V030211	IGTB940	IGTB940	TRUE	0.992058	baseline	2011-03-02	08:09:00	M	24	African-American
0412V021511_IFN	IFNB1	13	27003644	96.21	41492436	35682650	86	12	28067503	78.66	27076668	2056921003	2005211993	76	49.94	1170485947	23529971	36613	134778290	80419440	0.28	0.12	0.53	0.47	54.9	99.84	6.32	3.77	87.6	2.31	68.87	32.7	2132009457	2711881400	49245872	697114814	1		0412V021511	IGTB412	IGTB412	TRUE	0.992086	IFN	2011-09-29	07:40:00	M	54	Caucasian
1479V092911_FLU	Flu	13	31471968	97.12	44424588	39078344	87.97	33	32405104	82.92	31148041	2366391766	2315032325	76	49.95	1300336597	26764509	47435	163864917	110549202	0.25	0.13	0.62	0.47	52.82	99.82	6.66	4.49	86.19	2.67	71.44	33.36	2461657801	2969954144	65615056	821328595	5		1479V092911	IGTB1479	IGTB1479	TRUE	0.992087	FLU	2011-09-29	07:58:00	M	30	African-American
0506V080911_baseline	Baseline	13	45696658	97.58	55516506	50303430	90.61	1096	46829438	93.09	44634252	3390599294	3330135655	76	49.98	1883541987	38024568	74150	267524143	158060053	0.26	0.1	0.42	0.48	52.95	99.81	7.52	4.44	84.49	3.54	78.61	31.54	3557048727	3823060680	126073816	1121945673	6		0506V080911	IGTB506	IGTB506	TRUE	0.992091	baseline	2011-08-09	07:46:00	F	28	Caucasian
1442V100411_IFN	IFNB1	13	44504696	97.66	53754616	48849168	90.87	611	45572236	93.29	44144940	3353386427	3284763159	76	49.98	1968860980	38711099	59180	197669360	132263216	0.27	0.14	0.61	0.47	56.88	99.85	5.71	3.82	88.55	1.92	82.56	31.67	3461437594	3712536768	66422024	1096268055	2		1442V100411	IGTB1442	IGTB1442	TRUE	0.992111	IFN	2011-10-04	07:45:00	F	23	Caucasian
1312V011812_IFN	IFNB1	13	30349606	97.83	37093304	33022358	89.03	115	31023552	93.95	29858672	2268273352	2227785404	76	49.97	1286157022	25668675	44140	161639769	98973753	0.28	0.12	0.54	0.47	54.58	99.83	6.86	4.2	86.23	2.71	80.97	31.65	2356511200	2509699208	63880584	745901070	3		1312V011812	IGTB1312	IGTB1312	TRUE	0.992139	IFN	2012-01-18	08:29:00	F	20	Caucasian
1255V111711_IFN	IFNB1	13	59378010	98.04	70648480	63636834	90.08	248	60566963	95.18	58568269	4449204651	4374797928	76	49.98	2493866710	50463963	89191	286020251	197322927	0.26	0.09	0.43	0.49	54.21	99.82	6.22	4.29	87.15	2.35	82.9	32.94	4600608335	4836399384	108111672	1515364233	3		1255V111711	IGTB1255	IGTB1255	TRUE	0.992144	IFN	2011-11-17	08:14:00	M	20	Caucasian
0190V030911_FLU	Flu	13	34382788	97.75	47469032	42139556	88.77	169	35175995	83.48	33884387	2574226009	2531367118	76	49.97	1374118474	28386258	62514	205103266	123046269	0.25	0.13	0.6	0.47	51.42	99.78	7.68	4.6	84.58	3.14	70.57	33.16	2672116584	3202606256	83839248	886061078	3		0190V030911	IGTB190	IGTB190	TRUE	0.992171	FLU	2011-03-09	07:50:00	M	29	Caucasian
1165V041211_IFN	IFNB1	13	28409158	96.34	42896652	37112362	86.52	16	29486931	79.45	28344976	2153376161	2100979972	76	49.94	1235601436	24633697	42002	137337119	92696376	0.28	0.15	0.62	0.46	55.16	99.83	6.13	4.14	87.15	2.58	69.21	31.99	2239936648	2820539512	57765928	716570043	1		1165V041211	IGTB1165	IGTB1165	TRUE	0.992195	IFN	2011-04-12	08:16:00	M	46	Caucasian
1046V082411_FLU	Flu	13	32138498	97.02	46872624	40799720	87.04	46	33124332	81.19	31858492	2420427868	2370588923	76	49.95	1332153129	27307572	48659	174539048	116147835	0.25	0.11	0.54	0.48	52.94	99.82	6.94	4.62	86.02	2.43	69.81	33.08	2516375769	3100778720	61154312	832412161	5		1046V082411	IGTB1046	IGTB1046	TRUE	0.992216	FLU	2011-08-24	07:41:00	F	21	African-American
1324V060111_FLU	Flu	13	37231740	98.04	49168050	44191394	89.88	174	37976439	85.94	36256685	2752257910	2705265475	76	49.97	1517506656	30886865	75574	200884807	119806517	0.26	0.13	0.58	0.48	52.65	99.76	6.97	4.16	85.16	3.72	73.09	32.52	2882456313	3358545944	107174440	937276037	3		1324V060111	IGTB1324	IGTB1324	TRUE	0.992217	FLU	2011-06-01	07:47:00	M	48	Caucasian
1305V053111_baseline	Baseline	13	29034392	97.27	35777274	32081140	89.67	644	29850384	93.05	28292831	2149195628	2104562096	76	49.96	1187952746	24034415	47164	178931807	98129583	0.28	0.11	0.47	0.47	52.39	99.8	7.89	4.33	83.9	3.88	78.02	31.51	2267320313	2438166640	87967720	714408930	6		1305V053111	IGTB1305	IGTB1305	TRUE	0.992226	baseline	2011-05-31	08:02:00	M	23	Caucasian
0469V072811_baseline	Baseline	13	33139752	97.67	39667348	35805592	90.26	727	33932055	94.77	32258462	2450347032	2402812109	76	50	1361838236	27365961	51660	211365650	104426290	0.27	0.1	0.41	0.48	52.84	99.81	8.2	4.05	84.1	3.65	79.65	31.26	2577217036	2721224992	94062312	805607116	6		0469V072811	IGTB469	IGTB469	TRUE	0.992229	baseline	2011-07-28	08:15:00	F	30	Caucasian
0802V063011_IFN	IFNB1	13	33747564	96.43	51330084	43502068	84.75	24	34998352	80.45	33789590	2567001273	2503571981	76	49.94	1470881990	29259046	45134	171959938	112143124	0.27	0.13	0.57	0.47	55.33	99.85	6.47	4.22	87.12	2.2	70.06	31.79	2658594707	3306157168	58396424	845246389	1		0802V063011	IGTB802	IGTB802	TRUE	0.992229	IFN	2011-06-30	08:19:00	F	30	Caucasian
1275V060811_baseline	Baseline	13	49429392	97.44	60810962	54309254	89.31	1154	50728005	93.41	48522499	3686073989	3617139617	76	49.99	2065985974	41270071	90980	293376058	174952574	0.27	0.11	0.5	0.47	53.62	99.78	7.61	4.54	84.7	3.14	79.08	31.09	3853294774	4127503304	121122112	1197938994	6		1275V060811	IGTB1275	IGTB1275	TRUE	0.992237	baseline	2011-06-08	07:50:00	F	24	Caucasian
0930V062911_FLU	Flu	13	49272390	97.93	65725990	58148768	88.47	231	50313628	86.53	48045921	3648410833	3586366599	76	49.97	2015581807	40883954	87487	279647710	149596960	0.25	0.14	0.64	0.48	52.76	99.79	7.32	3.92	84.92	3.85	73.41	32.16	3820143019	4419306368	147006040	1228501426	3		0930V062911	IGTB930	IGTB930	TRUE	0.992247	FLU	2011-06-29	07:45:00	M	32	Caucasian
1200V041311_baseline	Baseline	13	36106214	97.47	44455508	39549738	88.96	815	37043615	93.66	35476621	2695086180	2644537104	76	49.99	1515903858	30516216	54867	208378486	118823104	0.26	0.1	0.47	0.48	53.87	99.82	7.41	4.22	85.55	2.82	80.09	31.68	2813895640	3005780088	79379720	891467220	6		1200V041311	IGTB1200	IGTB1200	TRUE	0.992251	baseline	2011-04-13	08:23:00	M	42	African-American
1088V060911_baseline	Baseline	13	52733832	97.76	64437420	57318080	88.95	1251	53942142	94.11	51697540	3927553203	3857626286	76	49.99	2247589493	44814911	88873	289355010	150161373	0.26	0.13	0.58	0.47	54.85	99.8	7.06	3.66	86.57	2.7	81.44	31.72	4097795356	4356174080	110737016	1300008298	6		1088V060911	IGTB1088	IGTB1088	TRUE	0.992273	baseline	2011-06-09	08:22:00	M	50	African-American
1417V092911_FLU	Flu	13	33948880	97.12	48059048	42055124	87.51	29	34957060	83.12	33530979	2547243511	2491316049	76	49.97	1398137801	29505634	44760	160107077	84615965	0.31	0.12	0.5	0.48	52.66	99.85	6.03	3.19	87.92	2.86	73.04	35.27	2655237550	3196189424	76009272	936418011	5		1417V092911	IGTB1417	IGTB1417	TRUE	0.992292	FLU	2011-09-29	08:12:00	M	50	African-American
1308V011912_IFN	IFNB1	13	43854876	98.17	52089158	47028476	90.28	202	44673354	94.99	42800890	3248775091	3197907632	76	49.97	1801060562	35955847	78503	271510950	168157190	0.27	0.13	0.53	0.48	53.12	99.78	8.01	4.96	83.94	3.1	79.62	30.81	3390471633	3574164176	105189624	1044756165	3		1308V011912	IGTB1308	IGTB1308	TRUE	0.992311	IFN	2012-01-19	07:51:00	F	19	Caucasian
1466V011812_FLU	Flu	13	31341574	95.6	49234404	40851648	82.97	2179	32785542	80.26	31693893	2407896086	2335029677	76	49.91	1266213526	26730467	54716	184936504	126914344	0.27	0.1	0.43	0.48	50.84	99.8	7.43	5.1	85.27	2.21	68.4	34.43	2490531299	3104725248	55101976	857394506	4		1466V011812	IGTB1466	IGTB1466	TRUE	0.992326	FLU	2012-01-18	08:15:00	M	19	Caucasian
1222V062311_FLU	Flu	13	43886986	97.12	61064090	52984796	86.77	58	45186485	85.28	43595154	3311745932	3243828641	76	49.95	1833159486	37060800	72285	242109554	147668464	0.24	0.14	0.65	0.47	53.41	99.81	7.05	4.3	85.98	2.67	73.29	32.57	3432331492	4026844496	91484544	1117973642	5		1222V062311	IGTB1222	IGTB1222	TRUE	0.992345	FLU	2011-06-23	08:17:00	F	25	Caucasian
1279V060911_FLU	Flu	13	34253472	97.05	49757850	43178898	86.78	77	35296240	81.74	33864107	2572254653	2519279100	76	49.96	1444629096	28905425	53410	191857979	115392479	0.25	0.14	0.68	0.48	53.89	99.82	7.16	4.3	85.58	2.96	69.91	31.69	2680719642	3281596248	79376832	849531945	5		1279V060911	IGTB1279	IGTB1279	TRUE	0.992366	FLU	2011-06-09	07:46:00	F	19	Caucasian
1200V041311_FLU	Flu	13	37297176	97.91	50948162	45700830	89.7	199	38094181	83.36	36615282	2781537694	2732790605	76	49.98	1513397019	31429491	60405	204477522	121163059	0.26	0.13	0.58	0.48	52.3	99.81	7.07	4.19	86.02	2.73	71.66	33.72	2893539076	3473263080	78973880	975582971	3		1200V041311	IGTB1200	IGTB1200	TRUE	0.992403	FLU	2011-04-13	08:23:00	M	42	African-American
0678V081811_FLU	Flu	13	41331664	97.98	54595946	48163204	88.22	202	42184252	87.59	40325236	3062054216	3010934464	76	49.98	1692974391	34178593	71756	226346075	138818828	0.25	0.13	0.61	0.49	52.86	99.79	7.07	4.33	84.89	3.72	74.27	32.03	3202828627	3660403504	119088048	1025766629	3		0678V081811	IGTB678	IGTB678	TRUE	0.992408	FLU	2011-08-18	08:23:00	M	34	Caucasian
1223V051911_IFN	IFNB1	13	32325882	96.12	49606852	42474174	85.62	18	33629628	79.18	32261535	2450954605	2389902664	76	49.92	1403829239	27772570	48615	165578602	121164512	0.28	0.15	0.64	0.47	54.95	99.83	6.48	4.74	86.19	2.59	68.21	31.24	2554729164	3228037224	66166816	798028691	1		1223V051911	IGTB1223	IGTB1223	TRUE	0.992447	IFN	2011-05-19	08:24:00	M	47	Caucasian
0350V081811_IFN	IFNB1	13	38131998	96.26	58489184	49797246	85.14	27	39614476	79.55	38325627	2911624601	2840418035	76	49.94	1672093384	33181946	53427	197506449	131124355	0.27	0.14	0.64	0.46	55.56	99.84	6.56	4.36	87.25	1.83	69.37	31.68	3009280100	3784590696	55203056	953386164	1		0350V081811	IGTB350	IGTB350	TRUE	0.992458	IFN	2011-08-18	08:25:00	F	29	Caucasian
0843V021711_FLU	Flu	13	39728364	98.04	56198738	49976024	88.93	215	40522386	81.08	38973020	2959255785	2909183674	76	49.98	1634420699	33158243	74657	237745078	139290677	0.25	0.15	0.61	0.48	53.13	99.78	7.73	4.53	85.17	2.58	68.99	32.04	3076444017	3798177824	79288824	985807437	3		0843V021711	IGTB843	IGTB843	TRUE	0.992461	FLU	2011-02-17	08:19:00	F	20	Caucasian
0713V020311_IFN	IFNB1	13	36246946	96.34	55508508	47220078	85.07	19	37624239	79.68	36329201	2760110420	2694133217	76	49.94	1596918819	31998867	44858	162834188	104467264	0.28	0.13	0.56	0.47	55.87	99.86	5.7	3.65	88.56	2.09	70.53	32.69	2858292636	3588725928	59736304	934363419	1		0713V020311	IGTB713	IGTB713	TRUE	0.992463	IFN	2011-02-03	08:15:00	F	49	Caucasian
0533V033011_IFN	IFNB1	13	32712702	96.2	49515920	42519924	85.87	23	34005206	79.97	32869028	2497123463	2434155249	76	49.94	1445269015	28818619	44307	149512200	99461882	0.28	0.14	0.58	0.46	55.95	99.85	5.79	3.85	88.35	2.01	70.63	32.4	2583210494	3231514224	51983392	837010301	1		0533V033011	IGTB533	IGTB533	TRUE	0.992465	IFN	2011-06-21	08:15:00	M	32	Caucasian
0836V030311_FLU	Flu	13	38062422	97.9	52153780	46443144	89.05	164	38877092	83.71	37315237	2833110176	2784795304	76	49.98	1546575624	31121706	86242	218903693	161954134	0.24	0.15	0.69	0.48	52.4	99.72	7.42	5.49	83.99	3.11	70.23	31.59	2951304316	3529678944	91799488	932211280	3		0836V030311	IGTB836	IGTB836	TRUE	0.992467	FLU	2011-03-03	08:10:00	F	23	Caucasian
0010V052510_FLU	Flu	13	29340940	95.29	47984350	39999094	83.36	2308	30792154	76.98	29634611	2251152184	2179997431	76	49.92	1177621071	24660441	53327	177776683	148071097	0.26	0.1	0.44	0.49	50.35	99.78	7.6	6.33	83.76	2.31	64.44	33.41	2338767792	3039931144	54073848	781269488	4		0010V052510	IGTB10	IGTB616	FALSE	0.992475	FLU	2010-05-25	07:46:00	F	23	African-American
0661V031711_baseline	Baseline	13	29329612	97.6	35802754	32023512	89.44	671	30051077	93.84	28951431	2199394385	2156215143	76	49.99	1257540418	24891738	44789	177095521	89910425	0.26	0.09	0.43	0.49	55.09	99.82	7.76	3.94	86.17	2.14	80.82	31.08	2282744154	2433786912	48799600	709431941	6		0661V031711	IGTB661	IGTB661	TRUE	0.992503	baseline	2011-03-17	07:57:00	F	27	Caucasian
0945V051911_IFN	IFNB1	13	34162612	96.14	54150064	46103356	85.14	17	35535109	77.08	34329124	2608077832	2538940338	76	49.94	1497923968	29800547	46364	171011462	116785777	0.28	0.14	0.6	0.47	55.49	99.84	6.34	4.33	87.38	1.96	67.32	31.89	2699453406	3503855056	52842800	860918712	1		0945V051911	IGTB945	IGTB945	TRUE	0.992505	IFN	2011-05-19	08:05:00	M	20	Caucasian
0863V113011_IFN	IFNB1	13	41620130	98.06	50032978	44846532	89.63	161	42444099	94.64	40820214	3101047752	3048020458	76	49.96	1749354209	35071654	59153	216796521	137375444	0.27	0.12	0.52	0.48	54.26	99.83	6.72	4.26	86.1	2.92	81.45	31.84	3224191975	3408336432	93999232	1026725350	3		0863V113011	IGTB863	IGTB863	TRUE	0.992582	IFN	2011-11-30	08:37:00	F	21	Caucasian
1344V062811_baseline	Baseline	13	35776250	97.45	44099692	39513676	89.6	804	36713850	92.91	35076003	2664715928	2612149544	76	49.97	1477851270	29885063	63321	221503172	117597785	0.26	0.11	0.52	0.47	52.99	99.79	7.94	4.22	84.59	3.26	78.56	31.6	2788925645	3003039376	90837328	881193276	6		1344V062811	IGTB1344	IGTB1344	TRUE	0.992599	baseline	2011-06-28	07:39:00	M	19	Caucasian
1193V042111_FLU	Flu	13	35202026	97.44	48224992	41923668	86.93	32	36127852	86.18	34530226	2621910521	2568689365	76	49.96	1489584593	29802137	57189	178360462	107116230	0.25	0.13	0.62	0.49	54.31	99.81	6.5	3.91	86.13	3.47	74.14	31.82	2742831148	3186198768	95089072	872818298	5		1193V042111	IGTB1193	IGTB1193	TRUE	0.992607	FLU	2011-04-21	07:55:00	M	41	Caucasian
1369V071211_IFN	IFNB1	13	41347696	98.21	49450860	43994122	88.97	156	42101893	95.7	40245101	3056655186	3004881166	76	49.98	1708608168	33869978	63581	258716681	143636224	0.27	0.12	0.52	0.47	53.44	99.81	8.09	4.49	83.85	3.57	80.18	30.41	3197317847	3343553272	114085120	972386691	3		1369V071211	IGTB1369	IGTB1369	TRUE	0.992609	IFN	2011-07-12	07:59:00	F	24	Caucasian
0373V021711_IFN	IFNB1	13	30913518	96.19	46983292	40068410	85.28	9	32138330	80.21	31064446	2359995471	2302214550	76	49.93	1346521762	27090353	43485	143858721	87971764	0.27	0.13	0.54	0.47	55.15	99.84	5.89	3.6	88.33	2.18	70.81	33.17	2441368380	3045199160	53173704	809871282	1		0373V021711	IGTB373	IGTB373	TRUE	0.992616	IFN	2011-08-11	08:16:00	M	40	Caucasian
1421V091311_FLU	Flu	13	36731516	97.1	50592264	44305884	87.57	31	37828527	85.38	36200183	2748430142	2689755969	76	49.95	1580703126	31503391	61252	179011636	106686754	0.24	0.18	0.8	0.47	55.04	99.81	6.23	3.72	87.1	2.96	74.28	32.06	2871728571	3367247184	84864640	920592079	5		1421V091311	IGTB1421	IGTB1421	TRUE	0.992622	FLU	2011-09-13	07:39:00	M	19	African-American
0661V031711_FLU	Flu	13	40173620	98.08	52360226	47053494	89.87	184	40961154	87.05	39179870	2974441834	2924092348	76	49.98	1659772461	33406656	77027	223309333	133166393	0.26	0.14	0.62	0.48	53.38	99.77	7.18	4.28	85.17	3.37	74.05	31.79	3109329861	3576065544	104792600	988456216	3		0661V031711	IGTB661	IGTB661	TRUE	0.992634	FLU	2011-03-17	07:57:00	F	27	Caucasian
1302V101911_IFN	IFNB1	13	46047600	97.64	56044572	50726636	90.51	630	47160565	92.97	45155897	3430321751	3361887972	76	49.97	1970921457	39469357	57203	226930621	123695110	0.28	0.14	0.59	0.47	55.02	99.86	6.33	3.45	87.17	3.05	81	32.15	3582291379	3855224336	109157888	1151661492	2		1302V101911	IGTB1302	IGTB1302	TRUE	0.99268	IFN	2011-10-19	08:31:00	M	19	Caucasian
1396V022212_IFN	IFNB1	13	41810114	97.75	50042294	45588674	91.1	540	42771841	93.82	41082913	3121190436	3056588473	76	49.98	1770957188	35190021	56971	227354062	136711250	0.27	0.12	0.52	0.48	54.5	99.84	7	4.21	85.77	3.03	80.43	31.26	3249219154	3464739224	98491136	1015761349	2		1396V022212	IGTB1396	IGTB1396	TRUE	0.992691	IFN	2012-02-22	08:11:00	F	20	Caucasian
1394V082511_IFN	IFNB1	13	31312460	96.44	47627198	40836610	85.74	10	32469172	79.51	31437046	2388245664	2328612403	76	49.95	1393803430	27673691	39597	140648704	92267637	0.27	0.14	0.62	0.47	56.51	99.86	5.7	3.74	88.64	1.91	70.45	32.13	2466462436	3103582360	47191896	792580959	1		1394V082511	IGTB1394	IGTB1394	TRUE	0.99271	IFN	2011-08-25	07:43:00	M	37	Caucasian
1227V051211_IFN	IFNB1	13	25263470	97.9	30657848	27374862	89.29	127	25806012	94.27	24783884	1882714237	1849194580	76	49.97	1069615596	21414475	37866	123195971	83571396	0.28	0.12	0.53	0.47	54.57	99.82	6.28	4.26	86.69	2.76	81.68	32.12	1960177461	2080489512	54144984	629684736	3		1227V051211	IGTB1227	IGTB1227	TRUE	0.992716	IFN	2011-05-12	07:57:00	F	18	Caucasian
0917V031711_FLU	Flu	13	28215738	97.94	38441048	34504378	89.76	144	28808200	83.49	27746341	2107617881	2069751853	76	49.98	1167767069	23744124	49315	147032516	94696002	0.24	0.14	0.64	0.48	53.37	99.79	6.72	4.33	86.08	2.87	71.82	32.71	2187972532	2622332728	62805336	715721572	3		0917V031711	IGTB917	IGTB917	TRUE	0.992749	FLU	2011-03-17	07:43:00	F	28	Caucasian
1577V111711_IFN	IFNB1	13	33872136	97.86	41202218	36799742	89.32	146	34614449	94.06	33370897	2535148462	2490769645	76	49.96	1462804425	29187357	43658	160089604	99357529	0.27	0.12	0.56	0.47	55.63	99.85	6.09	3.78	87.72	2.41	82.47	32.09	2629366747	2796780392	63373360	843782039	3		1577V111711	IGTB1577	IGTB1577	TRUE	0.992749	IFN	2011-11-17	07:47:00	M	50	Caucasian
1369V071211_FLU	Flu	13	33527990	94.99	54604902	44314400	81.15	2430	35297109	79.65	33985502	2581881888	2498809175	76	49.92	1392338891	28776943	50509	200884514	117170708	0.26	0.12	0.49	0.48	51.93	99.82	7.49	4.37	85.52	2.62	68.08	33.59	2681183797	3367894400	70245432	900588368	4		1369V071211	IGTB1369	IGTB1369	TRUE	0.99275	FLU	2011-07-12	07:59:00	F	24	Caucasian
0843V021711_IFN	IFNB1	13	31763968	96.49	47171696	40553586	85.97	13	32920124	81.18	31905970	2424128690	2363380241	76	49.96	1389026013	27925466	42158	155387389	93357367	0.28	0.13	0.56	0.47	55.54	99.85	6.21	3.73	88.36	1.69	71.7	32.82	2500950237	3082072536	42277432	820920691	1		0843V021711	IGTB843	IGTB843	TRUE	0.992759	IFN	2011-02-17	08:19:00	F	20	Caucasian
1418V080911_baseline	Baseline	13	25284676	97.39	31056914	27761530	89.39	568	25961611	93.52	24842863	1887193304	1849203495	76	49.97	1052099471	21196947	41700	152716609	85546799	0.26	0.09	0.41	0.48	53.35	99.8	7.74	4.34	84.96	2.96	79.41	31.61	1971999158	2109876280	58396728	623283424	6		1418V080911	IGTB1418	IGTB1418	TRUE	0.992776	baseline	2011-08-09	07:55:00	F	25	Caucasian
1046V082411_IFN	IFNB1	13	32400882	96.16	49313622	42024474	85.22	25	33694641	80.18	32587477	2475701305	2413793806	76	49.93	1441788379	28714074	41331	145281215	98006620	0.28	0.13	0.55	0.46	56.33	99.86	5.68	3.83	88.69	1.8	71.08	32.36	2559597134	3193860024	46144616	828403615	1		1046V082411	IGTB1046	IGTB1046	TRUE	0.99279	IFN	2011-08-24	07:41:00	F	21	African-American
1393V060711_FLU	Flu	13	35303636	97.81	46491606	41810024	89.93	166	36092825	86.33	34740390	2639045881	2592141584	76	49.97	1461810170	30002465	53730	164053405	119945002	0.25	0.11	0.52	0.47	53.32	99.82	5.98	4.38	86.86	2.78	74.94	33.54	2741460512	3177561824	76337288	919372223	3		1393V060711	IGTB1393	IGTB1393	TRUE	0.992801	FLU	2011-06-07	08:03:00	F	28	Caucasian
0867V012011_IFN	IFNB1	13	29225342	96.36	44382566	38123722	85.9	20	30328478	79.55	29178985	2216734846	2161582266	76	49.93	1271926838	25418332	39004	148898231	84346926	0.28	0.12	0.5	0.47	55.21	99.85	6.46	3.66	87.38	2.49	69.48	32.18	2303826662	2897402872	57433200	741255883	1		0867V012011	IGTB867	IGTB867	TRUE	0.992819	IFN	2011-01-20	07:50:00	F	20	Caucasian
1345V092811_IFN	IFNB1	13	36814738	96.4	56109678	47527412	84.7	65	38191111	80.36	36799212	2795415302	2726394468	76	49.96	1604400513	31726284	50817	196999907	126614733	0.28	0.13	0.5	0.48	55.31	99.84	6.79	4.36	86.42	2.42	69.41	31.12	2900879417	3612083312	70274616	902643320	1		1345V092811	IGTB1345	IGTB1345	TRUE	0.99284	IFN	2011-09-28	08:22:00	M	18	East Asian
0496V080411_IFN	IFNB1	13	41560966	96.37	62240010	53515498	85.98	17	43127216	80.59	41809475	3176050259	3097801506	76	49.94	1801639719	36247211	60934	205194796	139701830	0.28	0.14	0.57	0.46	55	99.83	6.26	4.26	87.69	1.78	70.63	32.69	3275844703	4067177848	58319512	1071026976	1		0496V080411	IGTB496	IGTB496	TRUE	0.992849	IFN	2011-08-04	07:58:00	F	31	Caucasian
0536V081011_FLU	Flu	13	28808864	97.08	42157108	37089882	87.98	26	29675988	80.01	28426518	2159672039	2114546857	76	49.95	1157901924	24046731	48729	162616130	115826344	0.26	0.13	0.6	0.48	51.36	99.8	7.21	5.14	84.11	3.54	67.26	32.74	2254270290	2818831032	79853960	738140640	5		0536V081011	IGTB536	IGTB536	TRUE	0.992864	FLU	2011-08-10	07:35:00	M	24	Caucasian
1011V091311_FLU	Flu	13	34261274	97.17	49431382	43527310	88.06	49	35260131	81.01	33985731	2581862607	2527965898	76	49.97	1436825422	29547817	50558	175455400	114082176	0.26	0.14	0.6	0.47	53.65	99.83	6.55	4.26	87.02	2.17	70.46	33.38	2678327075	3308075560	58099720	893898761	5		1011V091311	IGTB1011	IGTB1011	TRUE	0.99289	FLU	2011-09-13	07:46:00	F	20	African-American
1195V110311_IFN	IFNB1	13	46126834	97.6	56302800	51053272	90.68	594	47262352	92.57	45272310	3439154452	3370430115	76	49.96	1977160755	39557375	57571	211056351	137970917	0.26	0.15	0.65	0.46	55.07	99.85	5.88	3.84	87.19	3.09	80.67	32.12	3590077611	3880048672	110906952	1153053599	2		1195V110311	IGTB1195	IGTB1195	TRUE	0.992893	IFN	2011-11-03	07:49:00	F	26	Caucasian
1308V011912_FLU	Flu	13	26718396	95.56	43471040	36089562	83.02	1902	27959765	77.47	26903141	2043777773	1983219341	76	49.91	1092689270	22667109	44061	156252452	104688582	0.26	0.11	0.45	0.49	51.45	99.81	7.36	4.93	85.06	2.66	65.86	33.61	2123786732	2742806712	56417840	713777812	4		1308V011912	IGTB1308	IGTB1308	TRUE	0.992895	FLU	2012-01-19	07:51:00	F	19	Caucasian
1479V092911_baseline	Baseline	13	43679052	97.59	54024888	48178210	89.18	1099	44758333	92.9	42923460	3260794812	3203903272	76	49.98	1817678266	36518323	69990	250715006	180309712	0.26	0.11	0.52	0.47	53.46	99.81	7.37	5.3	84.72	2.61	78.66	31.25	3399902356	3661543960	88710848	1062548442	6		1479V092911	IGTB1479	IGTB1479	TRUE	0.992902	baseline	2011-09-29	07:58:00	M	30	African-American
1344V062811_FLU	Flu	13	35420628	97.04	47714122	41802542	87.61	40	36502591	87.32	35078445	2664896398	2607830438	76	49.95	1468575350	29962663	53663	179694801	122802143	0.25	0.14	0.57	0.46	52.96	99.82	6.48	4.43	85.9	3.19	74.97	32.94	2772795210	3176993192	88429952	913348699	5		1344V062811	IGTB1344	IGTB1344	TRUE	0.992903	FLU	2011-06-28	07:39:00	M	19	Caucasian
1217V080411_FLU	Flu	13	37062254	97.89	47709580	42729916	89.56	189	37859729	88.6	36470270	2770281623	2723361238	76	49.98	1511878966	30604147	65325	213106987	155889474	0.27	0.14	0.62	0.47	52.58	99.79	7.41	5.42	84.48	2.69	74.81	31.91	2875496758	3247473616	77228920	917455719	3		1217V080411	IGTB1217	IGTB1217	TRUE	0.992908	FLU	2011-08-04	07:45:00	F	45	Caucasian
1037V090711_baseline	Baseline	13	32261556	97.59	39304354	35259524	89.71	686	33058594	93.76	31456968	2389729187	2345213123	76	49.97	1349311844	27096506	50408	173271956	110536949	0.26	0.11	0.51	0.47	53.73	99.81	6.9	4.4	85.15	3.56	79.79	31.41	2511217917	2679723824	89286168	788869141	6		1037V090711	IGTB1037	IGTB1037	TRUE	0.992925	baseline	2011-09-07	08:06:00	M	20	African-American
0876V030211_baseline	Baseline	13	31300036	97.56	38073644	33989310	89.27	696	32083760	94.39	30797341	2339559724	2292076777	76	49.98	1304145060	26116122	55395	198150264	101318125	0.27	0.09	0.4	0.49	53.51	99.79	8.13	4.16	84.93	2.78	80.13	31.42	2437076713	2583187560	67862832	765647074	6		0876V030211	IGTB876	IGTB876	TRUE	0.992926	baseline	2011-03-02	07:55:00	F	26	Caucasian
1415V091311_baseline	Baseline	13	31480060	97.54	38665006	34441236	89.08	715	32275097	93.71	30861562	2344383551	2298608224	76	49.98	1301347329	26108727	53279	202607975	104732006	0.26	0.11	0.48	0.47	53.08	99.8	8.26	4.27	84.25	3.22	78.91	31.17	2451551417	2617533936	78823552	764096528	6		1415V091311	IGTB1415	IGTB1415	TRUE	0.992926	baseline	2011-09-13	08:22:00	F	22	Caucasian
1223V051911_FLU	Flu	13	40669192	97.98	52519784	46578256	88.69	177	41506098	89.11	39599370	3007377253	2954276540	76	49.98	1677089070	33331050	73981	226355311	151268214	0.26	0.14	0.64	0.48	53.21	99.78	7.18	4.8	84.22	3.8	74.99	31.01	3151868020	3539947456	119890000	977400654	3		1223V051911	IGTB1223	IGTB1223	TRUE	0.99293	FLU	2011-05-19	08:24:00	M	47	Caucasian
0876V030211_FLU	Flu	13	34984804	97.93	47306208	42042002	88.87	153	35724893	84.97	34139612	2593045037	2550998693	76	49.97	1437238034	28828441	61200	198128961	120986444	0.25	0.13	0.58	0.48	52.97	99.79	7.3	4.46	84.53	3.72	71.77	31.55	2713131464	3195192152	100803664	856066922	3		0876V030211	IGTB876	IGTB876	TRUE	0.992939	FLU	2011-03-02	07:55:00	F	26	Caucasian
1434V081811_IFN	IFNB1	13	30804312	96.25	47077538	40008382	84.98	25	32004256	79.99	30914141	2348684901	2290762803	76	49.94	1349006309	27015779	39254	148183348	90970592	0.28	0.14	0.58	0.47	55.49	99.85	6.09	3.74	88.07	2.1	70.42	32.58	2431286175	3040637032	50938696	792211656	1		1434V081811	IGTB1434	IGTB1434	TRUE	0.992961	IFN	2011-08-18	07:45:00	F	23	African-American
1415V091311_IFN	IFNB1	13	37131796	96.34	56636294	47944580	84.65	25	38540692	80.39	37177235	2823953143	2754849401	76	49.94	1601931870	32000095	54469	209709062	114943121	0.28	0.11	0.48	0.47	54.72	99.83	7.16	3.93	86.47	2.45	69.46	31.74	2927252003	3643788080	71594432	929133962	1		1415V091311	IGTB1415	IGTB1415	TRUE	0.992981	IFN	2011-09-13	08:22:00	F	22	Caucasian
IGTB621_unstim_Exp7	Baseline	2	39926040	97.88	45237296	43219424	95.54	608	40791526	94.38	39230285	2980116722	2950683988	76	49.97	1714901861	33791560	65153	225878112	123943381	0.25	0.15	0.69	0.46	55.35	99.81	7.29	4	86.24	2.47	81.35	30.89	3098455420	3284676224	76555256	957224558	pilot		0621V012611	IGTB621	IGTB621	TRUE	0.992987	baseline	2011-07-27	07:55:00	F	32	Caucasian
0621V012611_IFN	IFNB1	13	28390538	96.41	43137236	37188794	86.21	18	29448509	79.19	28297766	2149828091	2098189104	76	49.94	1224507540	24584678	43646	131835926	93254728	0.28	0.13	0.56	0.46	54.74	99.82	5.89	4.17	87.24	2.7	69.05	32.51	2237060058	2826348344	60325608	727167280	1		0621V012611	IGTB621	IGTB621	TRUE	0.992993	IFN	2011-07-27	07:55:00	F	32	Caucasian
0661V031711_IFN	IFNB1	13	31468782	96.43	46789828	40356754	86.25	14	32634235	80.86	31469264	2390264792	2330328187	76	49.95	1379725835	27355150	45818	163983624	96940282	0.27	0.13	0.56	0.47	55.67	99.83	6.62	3.91	87.22	2.26	70.48	31.55	2478515667	3067113304	55922472	781991715	1		0661V031711	IGTB661	IGTB661	TRUE	0.993001	IFN	2011-03-17	07:57:00	F	27	Caucasian
1229V062811_IFN	IFNB1	13	30310608	97.72	36667822	33094880	90.26	392	31017748	93.72	29858018	2268211849	2220482390	76	49.98	1307036535	26041410	38994	144741897	87454648	0.26	0.13	0.58	0.47	55.48	99.85	6.14	3.71	87.47	2.68	81.93	31.99	2356078695	2515210880	63103256	753787540	2		1229V062811	IGTB1229	IGTB1229	TRUE	0.993014	IFN	2011-06-28	08:22:00	F	28	Caucasian
1245V082311_baseline	Baseline	13	24601578	97.51	30158480	26995566	89.51	565	25230576	93.46	24107843	1831353419	1796376848	76	49.99	1028797690	20576060	38459	145669220	87780058	0.25	0.1	0.47	0.48	53.68	99.81	7.6	4.58	84.71	3.12	79.13	31.02	1916493930	2051663016	59706056	594584496	6		1245V082311	IGTB1245	IGTB1245	TRUE	0.993025	baseline	2011-05-11	08:04:00	M	43	Caucasian
0802V063011_FLU	Flu	13	32411044	97.13	43950648	38796338	88.27	45	33367304	86.01	32245725	2449555889	2397790413	76	49.96	1356673559	27548148	52115	168839233	109906923	0.25	0.13	0.6	0.48	53.53	99.81	6.66	4.34	86.46	2.54	74.32	32.94	2534472025	2948521688	64356952	834742183	5		0802V063011	IGTB802	IGTB802	TRUE	0.993036	FLU	2011-06-30	08:19:00	F	30	Caucasian
1138V031711_IFN	IFNB1	13	35641836	96.53	54022458	46037684	85.22	17	36924245	80.2	35646648	2708032835	2643620193	76	49.96	1537494457	30867279	53537	175313977	113351880	0.29	0.13	0.53	0.47	54.82	99.83	6.25	4.04	87.5	2.2	70.15	32.69	2804851301	3498863984	61840744	916888839	1		1138V031711	IGTB1138	IGTB1138	TRUE	0.993044	IFN	2011-03-17	07:43:00	F	22	East Asian
1432V092111_IFN	IFNB1	13	31632864	96.46	47074356	40785134	86.64	19	32795375	80.41	31880513	2422080624	2366349384	76	49.94	1363970272	27424137	45851	153890602	112336046	0.27	0.11	0.48	0.48	54.75	99.83	6.18	4.51	87.77	1.54	70.55	33.03	2491439813	3099670184	38440040	822821310	1		1432V092111	IGTB1432	IGTB1432	TRUE	0.993048	IFN	2011-09-21	08:09:00	M	21	Caucasian
1114V042011_baseline	Baseline	13	47418508	97.76	56706864	51185268	90.26	1187	48505779	94.77	46662106	3544836440	3480169724	76	49.98	1980510949	39861034	74600	289207689	158682721	0.26	0.09	0.42	0.48	53.75	99.81	7.85	4.31	85.49	2.36	80.97	31.74	3684606219	3890080368	86812216	1169450484	6		1114V042011	IGTB1114	IGTB1114	TRUE	0.993059	baseline	2011-01-05	07:51:00	M	48	African-American
1479V092911_IFN	IFNB1	13	34442420	96.37	52548562	44743926	85.15	19	35740139	79.88	34617926	2630033382	2564091849	76	49.95	1517326009	30379847	42540	154655730	109918762	0.27	0.12	0.53	0.47	55.89	99.86	5.7	4.05	88.49	1.77	70.65	32.6	2715060108	3400538376	48038840	885144848	1		1479V092911	IGTB1479	IGTB1479	TRUE	0.993079	IFN	2011-09-29	07:58:00	M	30	African-American
1162V040711_IFN	IFNB1	13	14044736	95.95	21886482	18768654	85.75	15	14637632	77.99	14135540	1073885763	1045931012	76	49.94	602862143	12198610	21107	62300841	60842061	0.28	0.11	0.49	0.47	54.22	99.83	5.6	5.47	86.81	2.12	67.67	32.59	1111936314	1426417704	23571704	362373731	1		1162V040711	IGTB1162	IGTB1162	TRUE	0.993125	IFN	2011-08-18	08:03:00	F	28	African-American
1434V081811_baseline	Baseline	13	32483750	97.33	39955570	35778116	89.54	728	33373851	93.28	31881057	2421867730	2372435501	76	49.97	1359944143	27238000	50977	192479226	104738302	0.27	0.1	0.47	0.49	53.65	99.81	7.59	4.13	85.06	3.21	79.31	31.42	2535028543	2719136816	81458928	796467172	6		1434V081811	IGTB1434	IGTB1434	TRUE	0.993136	baseline	2011-08-18	07:45:00	F	23	African-American
1421V091311_IFN	IFNB1	13	40690646	96.49	59884408	51918990	86.7	14	42169209	81.22	40787324	3098482584	3023984526	76	49.94	1756312994	35747103	52274	198786174	111759018	0.28	0.1	0.43	0.49	54.83	99.85	6.21	3.49	88.25	2.06	71.64	33.42	3203162675	3945843240	65849288	1070502518	1		1421V091311	IGTB1421	IGTB1421	TRUE	0.993145	IFN	2011-09-13	07:39:00	M	19	African-American
1415V091311_FLU	Flu	13	33831342	97.18	46362364	40741268	87.88	28	34811529	85.45	33199779	2521589624	2468061796	76	49.95	1408157520	28290107	53271	194572436	105693403	0.25	0.15	0.68	0.47	53.26	99.81	7.36	4	84.89	3.75	72.48	31.63	2643730484	3096336368	99186992	836218074	5		1415V091311	IGTB1415	IGTB1415	TRUE	0.99315	FLU	2011-09-13	08:22:00	F	22	Caucasian
1639V011812_FLU	Flu	13	27336566	95.64	43293170	35795054	82.68	1943	28582864	79.85	27560208	2093610768	2031183300	76	49.92	1109766754	23168778	45008	160998170	107843741	0.26	0.09	0.4	0.49	51.12	99.81	7.42	4.97	85.03	2.59	67.85	33.91	2171028926	2720424104	56310984	736153096	4		1639V011812	IGTB1639	IGTB1639	TRUE	0.993152	FLU	2012-01-18	08:28:00	M	22	Caucasian
0064V080311_FLU	Flu	13	30959994	95.09	51814066	41952844	80.97	2302	32558854	77.61	31353057	2381827666	2305901024	76	49.89	1311967879	27289189	46213	156002589	100723823	0.27	0.11	0.49	0.48	53.05	99.83	6.31	4.07	87.27	2.35	67.69	34.22	2473081992	3188416144	58077680	846347324	4		0064V080311	IGTB64	IGTB64	TRUE	0.993162	FLU	2011-08-03	07:45:00	F	29	Caucasian
0920V011911_IFN	IFNB1	13	30143302	96.58	44035274	37808674	85.86	15	31210070	82.55	30138070	2289604457	2233012458	76	49.94	1309398638	26298624	42611	126263942	91442696	0.27	0.14	0.59	0.47	55.23	99.84	5.33	3.86	88.55	2.27	73.06	33.32	2370842639	2873459224	53801464	789966545	1		0920V011911	IGTB920	IGTB920	TRUE	0.993168	IFN	2011-04-21	07:42:00	M	41	Caucasian
0136V033111_IFN	IFNB1	13	35074262	96.24	52676014	45240042	85.88	13	36444768	80.56	35197144	2673998548	2605693476	76	49.94	1531219929	30724544	47393	158769936	109595294	0.28	0.13	0.51	0.47	55.31	99.85	5.73	3.96	88.13	2.18	70.96	32.82	2768544760	3438243192	60301744	908689856	1		0136V033111	IGTB136	IGTB136	TRUE	0.993183	IFN	2011-03-31	07:47:00	F	32	Caucasian
0899V030811_baseline	Baseline	13	39031012	97.59	47878264	42757238	89.3	873	39996708	93.54	38391438	2916447986	2863807936	76	49.98	1629524366	32952121	61732	233495718	126063237	0.27	0.09	0.44	0.48	53.64	99.81	7.69	4.15	85.75	2.42	80.17	32.12	3038149750	3249550088	73380584	975736008	6		0899V030811	IGTB899	IGTB899	TRUE	0.993196	baseline	2011-03-08	07:57:00	M	51	African-American
0930V062911_IFN	IFNB1	13	27249156	96.22	41710710	35959234	86.21	18	28320694	78.76	27410625	2082569483	2030645187	76	49.93	1186887335	23818283	38985	138669541	91743840	0.27	0.14	0.62	0.46	55.16	99.84	6.45	4.26	87.41	1.89	68.81	32.24	2151533556	2732901784	40555424	693695610	1		0930V062911	IGTB930	IGTB930	TRUE	0.993254	IFN	2011-06-29	07:45:00	M	32	Caucasian
1223V051911_baseline	Baseline	13	35480518	97.54	43593920	38853718	89.13	858	36374534	93.62	34641929	2630983383	2582236507	76	49.98	1482059580	29434830	66752	211428044	129280060	0.26	0.13	0.57	0.48	53.65	99.77	7.65	4.68	84.23	3.44	78.8	30.58	2762360688	2952882568	94913056	844782644	6		1223V051911	IGTB1223	IGTB1223	TRUE	0.993277	baseline	2011-05-19	08:24:00	M	47	Caucasian
0876V030211_IFN	IFNB1	13	30941632	96.29	46398194	39665046	85.49	26	32135399	81.02	30951864	2351376801	2292924872	76	49.94	1328334356	26778488	43367	163119445	94074966	0.29	0.12	0.5	0.47	54.42	99.84	6.68	3.85	86.92	2.54	70.39	32.51	2441059769	3014543496	62099448	793469640	1		0876V030211	IGTB876	IGTB876	TRUE	0.993287	IFN	2011-03-02	07:55:00	F	26	Caucasian
1467V121411_IFN	IFNB1	13	33346438	97.67	39930880	36577946	91.6	415	34143593	93.34	32882512	2498153329	2448371147	76	49.96	1433579076	28450085	43587	162968746	115211666	0.27	0.14	0.6	0.47	55.27	99.85	6.28	4.44	86.8	2.48	80.99	31.53	2593731262	2779923896	64240976	817766058	2		1467V121411	IGTB1467	IGTB1467	TRUE	0.993316	IFN	2011-12-14	08:03:00	F	25	Caucasian
1393V060711_IFN	IFNB1	13	37047402	96.38	55757908	48154078	86.36	18	38439887	79.83	37232659	2828437707	2756279009	76	49.94	1621570427	32551102	50446	169145191	124052898	0.28	0.12	0.52	0.47	55.54	99.85	5.79	4.25	88.21	1.74	70.38	32.68	2919908880	3659709928	50949792	954223177	1		1393V060711	IGTB1393	IGTB1393	TRUE	0.993317	IFN	2011-06-07	08:03:00	F	28	Caucasian
IGTB1211_unstim_Exp1	Baseline	2	44523008	98.18	49539160	47400020	95.68	612	45349572	95.67	43767421	3324975126	3290847908	76	49.97	1881077289	37143868	84279	248942096	177850391	0.25	0.15	0.68	0.46	54.6	99.77	7.23	5.16	85.36	2.25	81.63	30.76	3444897801	3602401520	77469384	1059605434	pilot		1466V011812	IGTB1466	IGTB1211	FALSE	0.993318	baseline	2011-05-12	08:11:00	F	23	East Asian
1650V011012_IFN	IFNB1	13	35854454	97.57	43575004	39394054	90.41	491	36748686	93.28	35521057	2698479209	2643012557	76	49.98	1588411516	31106588	50398	150541710	114146681	0.26	0.16	0.64	0.47	56.9	99.84	5.39	4.09	88.44	2.07	82.46	31.54	2791486850	2993948104	57908808	880515684	2		1650V011012	IGTB1650	IGTB1650	TRUE	0.99335	IFN	2012-01-10	07:59:00	F	30	Caucasian
1222V062311_IFN	IFNB1	13	32468852	96.55	47926426	41492274	86.57	15	33630218	81.05	32380130	2459982732	2400038133	76	49.94	1394076248	27741446	42815	177185706	112479826	0.27	0.12	0.5	0.48	54.57	99.85	6.94	4.4	85.98	2.68	69.66	31.42	2554774451	3153412824	68437544	802636817	1		1222V062311	IGTB1222	IGTB1222	TRUE	0.993354	IFN	2011-06-23	08:17:00	F	25	Caucasian
1324V060111_baseline	Baseline	13	29882148	97.42	36700452	32965074	89.82	665	30674944	93.05	29429227	2235576278	2191945646	76	49.97	1238742403	24990315	54220	180681425	111946304	0.26	0.1	0.45	0.48	53.16	99.78	7.75	4.8	84.83	2.62	78.89	31.66	2330036651	2505345624	60974800	737737673	6		1324V060111	IGTB1324	IGTB1324	TRUE	0.99337	baseline	2011-06-01	07:47:00	M	48	Caucasian
0178V031011_baseline	Baseline	13	78591420	97.75	95839692	85222602	88.92	1805	80401602	94.34	77131796	5859202865	5750895750	76	49.98	3286497701	66069850	114284	481489816	237137457	0.26	0.1	0.46	0.47	53.81	99.83	7.88	3.88	85.52	2.71	80.64	31.71	6107166438	6476917752	165771048	1936395150	6		0178V031011	IGTB178	IGTB178	TRUE	0.993383	baseline	2011-03-10	07:40:00	F	51	Caucasian
1440V101211_FLU	Flu	13	32083384	95.62	51210022	42158962	82.33	2273	33551795	79.58	32395636	2461076327	2383906765	76	49.91	1360609397	27891747	53579	163668757	111932064	0.26	0.12	0.56	0.49	53.39	99.81	6.42	4.39	87.12	2.06	69.3	33.74	2548643109	3204081112	52588656	859878556	4		1440V101211	IGTB1440	IGTB1440	TRUE	0.993477	FLU	2011-10-12	07:44:00	M	21	Caucasian
0178V031011_IFN	IFNB1	13	31303930	96.44	46583556	40038524	85.95	19	32461105	81.07	31323640	2379354694	2319447832	76	49.94	1373225367	27421481	39758	151402531	88695425	0.28	0.14	0.63	0.46	55.7	99.86	6.14	3.6	87.97	2.29	71.28	32.28	2465570015	3042927824	56520288	795769485	1		0178V031011	IGTB178	IGTB178	TRUE	0.993509	IFN	2011-03-10	07:40:00	F	51	Caucasian
1393V060711_baseline	Baseline	13	48818672	97.52	59480674	53200494	89.44	1114	50059826	94.1	48004262	3646737903	3575285686	76	49.98	2049813502	41479341	73499	266046712	160638529	0.26	0.1	0.43	0.48	53.91	99.82	7	4.22	86.16	2.62	81.03	32.25	3802578633	4043237544	99737536	1226412918	6		1393V060711	IGTB1393	IGTB1393	TRUE	0.993518	baseline	2011-06-07	08:03:00	F	28	Caucasian
0274V052610_FLU	Flu	13	31056034	95.42	48288266	39784492	82.39	2152	32545582	81.8	31179036	2368504969	2296011253	76	49.96	1290700910	26269956	53360	195676157	130390940	0.27	0.09	0.41	0.5	52.21	99.8	7.92	5.27	83.87	2.95	68.57	31.65	2472027366	3023621392	72825936	782489464	4		0274V052610	IGTB274	IGTB274	TRUE	0.993526	FLU	2010-05-26	08:11:00	M	47	Caucasian
1324V060111_IFN	IFNB1	13	29804208	96.37	44619234	38797626	86.95	22	30925761	79.71	29720096	2257661095	2201868155	76	49.93	1281064095	25488143	45162	155733742	119712734	0.27	0.15	0.63	0.46	54.54	99.82	6.63	5.1	85.79	2.49	68.34	31.25	2349055252	2948619576	58478352	734109736	1		1324V060111	IGTB1324	IGTB1324	TRUE	0.993531	IFN	2011-06-01	07:47:00	M	48	Caucasian
0575V081111_baseline	Baseline	13	42828366	97.67	52207714	46813970	89.67	1031	43848129	93.66	42143086	3201558060	3141041806	76	49.98	1780475256	35962541	71520	262794856	144109695	0.27	0.12	0.51	0.46	53.45	99.8	7.89	4.33	85.31	2.47	79.87	31.86	3330868028	3557861720	82332472	1061207915	6		0575V081111	IGTB575	IGTB575	TRUE	0.99354	baseline	2011-08-11	07:55:00	F	27	Caucasian
1448V081711_FLU	Flu	13	33051498	97.22	45066710	39337560	87.29	63	33997108	86.42	32662135	2481243459	2429162939	76	49.96	1399940663	28200037	46976	162833415	118083364	0.25	0.12	0.56	0.49	54.21	99.83	6.31	4.57	86.59	2.54	74.79	32.38	2582459373	2989654560	65512608	836136311	5		1448V081711	IGTB1448	IGTB1448	TRUE	0.993559	FLU	2011-08-17	08:18:00	F	29	African-American
0665V011812_IFN	IFNB1	13	39462458	98	47484072	42424268	89.34	172	40268231	94.92	38790924	2946854238	2894695108	76	49.97	1697343478	33786657	53842	192611241	119586600	0.27	0.13	0.56	0.47	55.49	99.84	6.3	3.91	87.37	2.42	82.89	31.88	3058801486	3224244368	74106992	975199797	3		0665V011812	IGTB665	IGTB665	TRUE	0.993567	IFN	2012-01-18	07:49:00	F	45	Caucasian
1601V112211_baseline	Baseline	13	40659324	97.67	49922248	44245644	88.63	976	41630160	94.09	39736021	3018598797	2961704754	76	49.99	1710204726	34164710	60212	244531140	120212536	0.27	0.11	0.48	0.48	54.08	99.82	7.73	3.8	85.45	3.02	80.36	31.37	3162217222	3362668944	95455088	991880091	6		1601V112211	IGTB1601	IGTB1601	TRUE	0.993591	baseline	2011-11-22	08:23:00	F	21	African-American
1217V080411_IFN	IFNB1	13	26127132	96.39	39644870	34354216	86.65	22	27105808	78.9	26167424	1987932044	1940867196	76	49.95	1112848942	22272339	43344	142650844	100925880	0.27	0.14	0.61	0.47	54.05	99.81	6.93	4.9	86.03	2.14	67.85	31.99	2059047173	2610920416	44029536	658617243	1		1217V080411	IGTB1217	IGTB1217	TRUE	0.993594	IFN	2011-08-04	07:45:00	F	45	Caucasian
1193V042111_IFN	IFNB1	13	37164248	96.58	56078074	47935250	85.48	25	38481280	80.28	37117865	2819135706	2752464074	76	49.94	1633959873	32227742	56099	185711668	120666621	0.26	0.13	0.57	0.48	55.91	99.83	6.35	4.13	87.25	2.27	69.99	31.34	2922417562	3643079000	66342376	915801000	1		1193V042111	IGTB1193	IGTB1193	TRUE	0.993596	IFN	2011-04-21	07:55:00	M	41	Caucasian
1446V062811_baseline	Baseline	13	42100032	97.63	51873124	45935430	88.55	993	43121991	93.88	41119819	3123671078	3067040061	76	49.98	1756095012	35103335	67331	252128350	135743979	0.26	0.12	0.51	0.47	53.61	99.81	7.7	4.14	84.73	3.43	79.5	31.12	3275506597	3491092680	112348976	1019270668	6		1446V062811	IGTB1446	IGTB1446	TRUE	0.99361	baseline	2011-06-28	08:14:00	M	21	African-American
1449V092711_FLU	Flu	13	33067130	97.12	46156122	40587652	87.94	37	34047049	83.89	32752758	2487892311	2434153141	76	49.96	1406215995	28400937	49005	169394217	105935859	0.25	0.14	0.66	0.47	54.38	99.83	6.55	4.1	86.97	2.38	72.91	32.59	2585907180	3084661552	61625512	842785539	5		1449V092711	IGTB1449	IGTB1449	TRUE	0.993627	FLU	2011-09-27	07:54:00	M	49	African-American
1448V081711_IFN	IFNB1	13	28269380	96.23	43110754	36539792	84.76	27	29378079	80.4	28472280	2163139320	2110488867	76	49.94	1236905826	24810205	42302	130313067	103561388	0.28	0.13	0.56	0.47	55.42	99.83	5.84	4.64	88.05	1.47	70.76	32.63	2231824948	2777024192	32908000	728151791	1		1448V081711	IGTB1448	IGTB1448	TRUE	0.993699	IFN	2011-08-17	08:18:00	F	29	African-American
1372V062911_FLU	Flu	13	41270128	97.95	52985632	47703546	90.03	194	42135089	88.33	40622738	3085626954	3034345721	76	49.97	1727734718	34857378	64505	212659333	125609247	0.25	0.13	0.56	0.48	53.99	99.82	6.65	3.93	86.74	2.69	76.57	32.75	3200162071	3625469496	86071064	1048157738	3		1372V062911	IGTB1372	IGTB1372	TRUE	0.993708	FLU	2011-06-29	08:08:00	F	18	Caucasian
0638V121311_FLU	Flu	13	33547692	95.36	55555960	45804872	82.45	2470	35181619	76.81	34002353	2583201648	2503149278	76	49.88	1386489912	29093329	55542	184127081	124532306	0.27	0.12	0.5	0.48	51.88	99.81	6.89	4.66	86.41	2.04	66.34	34.53	2672528184	3481170272	54462056	922948441	4		0638V121311	IGTB638	IGTB638	TRUE	0.993715	FLU	2011-12-13	08:40:00	M	21	Caucasian
1432V092111_FLU	Flu	13	44550404	96.89	62603238	54951378	87.78	58	45981915	83.68	44188516	3357024410	3287106183	76	49.94	1848930347	37694827	64735	234466521	156819978	0.25	0.13	0.62	0.47	52.93	99.83	6.71	4.49	85.79	3.01	71.75	32.86	3492983165	4176304728	105178376	1147648411	5		1432V092111	IGTB1432	IGTB1432	TRUE	0.993733	FLU	2011-09-21	08:09:00	M	21	Caucasian
1394V082511_baseline	Baseline	13	35465914	97.76	43170340	38821980	89.93	806	36277518	93.45	34746611	2639750141	2590809129	76	49.99	1470847480	29595368	58792	207561772	127233077	0.26	0.12	0.48	0.48	53.37	99.8	7.53	4.62	84.77	3.08	79.18	31.4	2755880323	2950470480	84975296	865310391	6		1394V082511	IGTB1394	IGTB1394	TRUE	0.993755	baseline	2011-08-25	07:43:00	M	37	Caucasian
1442V100411_FLU	Flu	13	46017028	97.16	65222402	57379170	87.97	57	47361619	82.54	45585147	3462780031	3391398575	76	49.97	1954676613	39384886	68875	233656626	145663983	0.25	0.15	0.67	0.47	54.34	99.83	6.5	4.05	86.71	2.75	71.53	32.37	3597294863	4360816920	98969176	1164401338	5		1442V100411	IGTB1442	IGTB1442	TRUE	0.993773	FLU	2011-10-04	07:45:00	F	23	Caucasian
1275V060811_IFN	IFNB1	13	43626794	97.64	52861090	47769038	90.37	478	44681609	93.54	42881003	3257572460	3188301613	76	49.98	1883780596	37246456	61459	217793739	129801339	0.27	0.13	0.58	0.47	55.5	99.84	6.42	3.82	86.74	3.02	81.09	31.24	3394001355	3630446888	102526432	1060170362	2		1275V060811	IGTB1275	IGTB1275	TRUE	0.993848	IFN	2011-06-08	07:50:00	F	24	Caucasian
1674V011812_IFN	IFNB1	13	41609772	97.99	50446496	45051108	89.3	222	42463125	94.26	40848937	3102900833	3049593468	76	49.98	1769646492	35236727	61177	203786484	139605171	0.27	0.12	0.52	0.48	54.87	99.83	6.32	4.33	86.67	2.68	81.64	31.8	3225301121	3423884208	86560808	1025768509	3		1674V011812	IGTB1674	IGTB1674	TRUE	0.993878	IFN	2012-01-18	07:52:00	F	24	African-American
1133V021511_FLU	Flu	13	33498054	97.83	44190650	39381474	89.12	175	34241318	86.95	32997937	2506700110	2462654642	76	49.97	1412284328	28410064	55445	169637975	118797187	0.27	0.14	0.6	0.48	54.3	99.81	6.52	4.57	86.47	2.44	75.15	32.18	2600968948	2992992024	63418048	836873973	3		1133V021511	IGTB1133	IGTB1133	TRUE	0.993884	FLU	2011-07-19	07:55:00	F	34	African-American
0517V062211_FLU	Flu	13	33836180	96.86	47938190	42162632	87.95	43	34933949	82.86	33621768	2554225707	2501383779	76	49.95	1441006471	29072743	51163	160161836	107288581	0.25	0.13	0.6	0.47	54.3	99.82	6.04	4.04	87.18	2.75	72.2	32.88	2653663522	3204360032	72846152	872407534	5		0517V062211	IGTB517	IGTB517	TRUE	0.993932	FLU	2011-06-22	08:12:00	F	36	Caucasian
0351V081711_FLU	Flu	13	26547622	97.02	38415528	33746808	87.85	48	27363374	81.08	26273096	1995846475	1954693663	76	49.96	1091002799	22262970	45470	145771816	103829638	0.25	0.13	0.63	0.48	52.49	99.8	7.01	5	84.83	3.17	68.74	32.34	2078464645	2564757408	65825576	672083744	5		0351V081711	IGTB351	IGTB351	TRUE	0.993951	FLU	2011-08-17	07:43:00	M	35	Caucasian
0351V081711_IFN	IFNB1	13	34176946	96.07	51959170	45277764	87.14	44	35573772	78.57	34401113	2613354424	2548694434	76	49.93	1492992286	29862056	48264	161972752	114646078	0.27	0.12	0.54	0.47	55.25	99.84	5.99	4.24	87.7	2.07	68.87	32.45	2702215936	3441110064	55809384	876831924	1		0351V081711	IGTB351	IGTB351	TRUE	0.993954	IFN	2011-08-17	07:43:00	M	35	Caucasian
0621V012611_FLU	Flu	13	32156520	97.77	43673930	39050694	89.41	166	32888658	84.22	31702235	2408237779	2367349813	76	49.97	1330634978	27093009	56384	165879564	122598576	0.26	0.14	0.62	0.48	53.27	99.79	6.64	4.91	86.01	2.44	72.4	32.75	2498068399	2967852744	60933000	818066510	3		0621V012611	IGTB621	IGTB621	TRUE	0.993964	FLU	2011-07-27	07:55:00	F	32	Caucasian
1250V083011_IFN	IFNB1	13	29654750	96.41	44030230	37969048	86.23	11	30759629	81.01	29686513	2255414711	2200550075	76	49.93	1295696902	25948094	38151	139159724	94682748	0.28	0.15	0.62	0.46	55.45	99.85	5.96	4.05	87.89	2.1	71.17	32.44	2336738952	2885647648	49097216	758126371	1		1250V083011	IGTB1250	IGTB1250	TRUE	0.993982	IFN	2011-05-17	07:37:00	M	35	Caucasian
0885V060110_FLU	Flu	13	34375454	95.36	55892998	45075118	80.65	2398	36046653	79.97	34546642	2624200523	2542088243	76	49.94	1427932372	28905256	56003	228356869	144790391	0.27	0.1	0.45	0.49	52.16	99.81	8.34	5.29	83.53	2.84	66.76	31.38	2737847480	3425708968	77760464	859069677	4		0885V060110	IGTB885	IGTB885	TRUE	0.993992	FLU	2010-06-01	07:53:00	M	47	Caucasian
1440V101211_IFN	IFNB1	13	38769784	97.71	46549436	42337396	90.95	509	39677963	93.72	38109371	2895114765	2837963495	76	49.97	1677039811	33366583	57852	170024280	106196388	0.27	0.13	0.55	0.47	55.64	99.83	5.64	3.52	88.03	2.81	82.46	32.39	3014000755	3217642096	84589976	976201982	2		1440V101211	IGTB1440	IGTB1440	TRUE	0.994009	IFN	2011-10-12	07:44:00	M	21	Caucasian
1133V021511_IFN	IFNB1	13	29099224	96.2	44234232	38065184	86.05	16	30247719	79.46	29049526	2206782204	2152421638	76	49.94	1261010443	25387092	39799	139486753	86762178	0.27	0.12	0.52	0.47	54.88	99.84	6.07	3.78	87.4	2.76	69.41	32.52	2297627943	2892953984	63306784	747105439	1		1133V021511	IGTB1133	IGTB1133	TRUE	0.994021	IFN	2011-07-19	07:55:00	F	34	African-American
1145V051811_FLU	Flu	13	26480954	97.9	34774836	31221146	89.78	146	27049943	86.64	25867970	1964946235	1932275825	76	49.98	1100666182	22272810	42373	139725138	77519795	0.25	0.14	0.63	0.48	53.57	99.81	6.8	3.77	86.11	3.32	74.56	32.54	2054501095	2372807096	68185072	668457105	3		1145V051811	IGTB1145	IGTB1145	TRUE	0.99405	FLU	2011-05-18	07:54:00	F	46	African-American
0496V080411_FLU	Flu	13	38232256	97.91	52002096	46207464	88.86	203	39049368	84.51	37419460	2842529236	2794487140	76	49.97	1534856215	31714076	68321	207443023	137950385	0.26	0.12	0.57	0.48	51.75	99.79	6.99	4.65	84.91	3.44	71.72	33.16	2965919360	3511767264	102098248	983644462	3		0496V080411	IGTB496	IGTB496	TRUE	0.994065	FLU	2011-08-04	07:58:00	F	31	Caucasian
1417V092911_baseline	Baseline	13	33582502	97.69	40647644	36491184	89.77	790	34378375	94.21	32927083	2501104342	2452807600	76	49.99	1434457053	28114983	61892	184370970	130757172	0.25	0.13	0.57	0.47	54.94	99.78	7.06	5.01	85.02	2.91	80.05	30.09	2611098860	2773329984	76013528	785563140	6		1417V092911	IGTB1417	IGTB1417	TRUE	0.99409	baseline	2011-09-29	08:12:00	M	50	African-American
1202V051711_IFN	IFNB1	13	40593182	98	48795954	43610806	89.37	201	41421997	94.98	39802536	3023562059	2971690244	76	49.98	1726102571	34469976	60372	192114111	137432540	0.27	0.12	0.54	0.48	54.86	99.83	6.11	4.37	86.72	2.81	82.32	31.86	3146263736	3314421256	88428280	1002246067	3		1202V051711	IGTB1202	IGTB1202	TRUE	0.994104	IFN	2011-05-17	07:59:00	M	47	African-American
0678V081811_baseline	Baseline	13	36318102	97.5	44672274	39927394	89.38	844	37248532	93.29	35423596	2690734476	2638133025	76	49.98	1515064385	30151071	57620	222195410	124910199	0.25	0.12	0.54	0.48	53.55	99.81	7.85	4.42	84.13	3.61	78.43	30.57	2829105801	3034481944	102060248	864962569	6		0678V081811	IGTB678	IGTB678	TRUE	0.994141	baseline	2011-08-18	08:23:00	M	34	Caucasian
0176V081611_IFN	IFNB1	13	25640406	96.23	38124132	32829694	86.11	7	26644562	81.16	25689615	1951516247	1901805747	76	49.94	1134285656	22281974	38508	124069808	94739782	0.27	0.15	0.64	0.47	56.05	99.83	6.13	4.68	87.04	2.15	70.61	31	2023858096	2495056744	43441296	627351033	1		0176V081611	IGTB176	IGTB176	TRUE	0.994171	IFN	2011-08-16	08:14:00	M	22	Caucasian
1446V062811_IFN	IFNB1	13	30115776	96.34	45182816	39240708	86.85	25	31258561	79.66	30068129	2284363899	2229187516	76	49.94	1307958767	26066645	40110	150977689	99534571	0.28	0.12	0.5	0.47	55.08	99.85	6.36	4.19	86.87	2.58	69.17	31.79	2374586253	2982293808	61269224	754881736	1		1446V062811	IGTB1446	IGTB1446	TRUE	0.994172	IFN	2011-06-28	08:14:00	M	21	African-American
0412V021511_baseline	Baseline	13	41229208	97.7	50503902	44847872	88.8	951	42197853	94.09	40382280	3067820288	3010879480	76	49.99	1717601620	34289066	62381	256240234	143282810	0.26	0.09	0.42	0.48	53.58	99.82	7.99	4.47	84.56	2.98	79.52	30.98	3205483050	3408438272	95482296	992935086	6		0412V021511	IGTB412	IGTB412	TRUE	0.994206	baseline	2011-09-29	07:40:00	M	54	Caucasian
1421V091311_baseline	Baseline	13	38667792	97.63	47516260	42199154	88.81	955	39608325	93.86	37886511	2878084904	2824199881	76	49.98	1607568357	32311900	62631	234232717	136439443	0.26	0.12	0.56	0.47	53.43	99.81	7.79	4.53	84.79	2.9	79.54	31.35	3008632808	3207135704	87118344	943332991	6		1421V091311	IGTB1421	IGTB1421	TRUE	0.99423	baseline	2011-09-13	07:39:00	M	19	African-American
1133V021511_baseline	Baseline	13	31732832	97.45	38814020	34698542	89.4	664	32564597	93.85	31235982	2372806897	2326604823	76	49.98	1325795308	26447111	53946	191372564	120648136	0.26	0.09	0.42	0.48	53.6	99.8	7.74	4.88	84.6	2.79	79.35	31	2473550138	2637089192	68978056	766809922	6		1133V021511	IGTB1133	IGTB1133	TRUE	0.994247	baseline	2011-07-19	07:55:00	F	34	African-American
1123V030811_FLU	Flu	13	52216782	98.08	66370188	59146030	89.12	211	53238731	90.01	50763337	3852897617	3787416483	76	49.99	2156797059	42877417	110560	287937045	229347752	0.26	0.14	0.62	0.48	53.38	99.74	7.13	5.68	83.78	3.42	75.3	30.4	4040243612	4495098280	138245064	1228194350	3		1123V030811	IGTB1123	IGTB1123	TRUE	0.994274	FLU	2011-03-08	08:01:00	M	47	African-American
1698V022812_baseline	Baseline	13	41362378	97.51	50615150	45579068	90.05	974	42419588	93.07	40722217	3093556424	3035903073	76	49.97	1718237523	34557477	65509	257969014	148221004	0.27	0.11	0.48	0.47	53.32	99.81	8.01	4.6	84.82	2.57	78.9	31.5	3222211150	3464009168	82840608	1015000030	6		1698V022812	IGTB1698	IGTB1698	TRUE	0.994449	baseline	2012-02-28	07:53:00	M	20	African-American
1369V071211_baseline	Baseline	13	47805858	97.64	57703218	51799852	89.77	1148	48961816	94.52	46743516	3550841153	3480223890	76	49.99	1927665399	39419459	77932	329026382	140764445	0.28	0.1	0.42	0.48	51.83	99.8	8.85	3.79	84.08	3.29	79.43	32.24	3719002160	3936788752	122485552	1199149609	6		1369V071211	IGTB1369	IGTB1369	TRUE	0.994507	baseline	2011-07-12	07:59:00	F	24	Caucasian
1046V082411_baseline	Baseline	13	46181880	97.7	56362842	50556454	89.7	1080	47268560	93.5	45347107	3444909349	3381764466	76	49.97	1950651472	38987003	76612	261999244	155348177	0.27	0.11	0.49	0.47	54.33	99.8	7.3	4.33	85.88	2.5	80.25	31.55	3590600029	3842290504	89699760	1132958302	6		1046V082411	IGTB1046	IGTB1046	TRUE	0.994511	baseline	2011-08-24	07:41:00	F	21	African-American
1448V081711_baseline	Baseline	13	54613202	97.78	66233246	59335640	89.59	1380	55851011	94.13	53244432	4044851831	3971382779	76	49.98	2201993211	45417996	87283	318476344	198854836	0.28	0.1	0.43	0.48	51.9	99.81	7.51	4.69	84.65	3.16	79.64	32.74	4242599775	4509508640	134139848	1389219832	6		1448V081711	IGTB1448	IGTB1448	TRUE	0.994561	baseline	2011-08-17	08:18:00	F	29	African-American
1242V110311_IFN	IFNB1	13	41018286	97.57	49799494	45109748	90.58	504	42039269	93.19	40402730	3068822193	3005474713	76	49.98	1770772236	34958097	54733	213260129	124967653	0.26	0.13	0.59	0.47	55.46	99.84	6.68	3.91	86.59	2.82	80.64	31.13	3192809712	3428340848	89902224	993989161	2		1242V110311	IGTB1242	IGTB1242	TRUE	0.994601	IFN	2011-11-03	08:34:00	F	21	Caucasian
0570V062211_FLU	Flu	13	31639260	97.26	43304150	37722522	87.11	33	32530896	86.24	31211818	2370629648	2321083942	76	49.97	1364968408	26860774	48761	157366145	105519009	0.24	0.14	0.66	0.49	55.25	99.82	6.37	4.27	86.4	2.96	74.46	31.16	2470588617	2866911672	73086768	769719679	5		0570V062211	IGTB570	IGTB570	TRUE	0.994608	FLU	2011-06-22	07:52:00	F	27	Caucasian
IGTB917_unstim_Exp7	Baseline	2	55580158	98.29	61484106	58846184	95.71	745	56548564	96.1	54703166	4154710265	4113719954	76	49.98	2384111145	47172020	84887	322026010	167123653	0.25	0.13	0.58	0.48	55.52	99.82	7.5	3.89	86.65	1.96	83.21	31.14	4294421388	4472309984	84090048	1337160518	pilot		0917V031711	IGTB917	IGTB917	TRUE	0.994755	baseline	2011-03-17	07:43:00	F	28	Caucasian
1442V100411_baseline	Baseline	13	32994562	97.45	40420616	36310066	89.83	768	33857847	93.25	32523476	2470634733	2420720190	76	49.99	1388012153	27489453	56539	196333236	135912373	0.26	0.12	0.56	0.47	53.97	99.79	7.63	5.28	84.52	2.56	78.77	30.55	2571769633	2759565016	65821472	785737202	6		1442V100411	IGTB1442	IGTB1442	TRUE	0.994917	baseline	2011-10-04	07:45:00	F	23	Caucasian
0010V052510_IFN	IFNB1	13	35321146	97.88	43205716	38396720	88.87	166	36085150	93.98	34655556	2632587967	2586770578	76	49.98	1474713949	29288950	54191	198892889	153645960	0.27	0.13	0.57	0.48	53.8	99.82	7.26	5.61	84.54	2.6	79.41	30.74	2740905535	2918150720	71246048	842461102	3		0010V052510	IGTB10	IGTB616	FALSE	0.994936	IFN	2010-05-25	07:46:00	F	23	African-American
IGTB1206_unstim_Exp1	Baseline	2	42361660	98.16	47440706	45424712	95.75	549	43157434	95.01	41330135	3139470277	3108006764	76	49.99	1786845624	35058919	74934	250094021	155038258	0.25	0.14	0.63	0.46	54.51	99.79	7.63	4.73	84.66	2.98	80.39	30.15	3277991239	3452278112	97679608	988412221	pilot		0619V011812	IGTB619	IGTB1206	FALSE	0.995067	baseline	2011-05-10	08:05:00	F	19	East Asian
IGTB1197_unstim_Exp7	Baseline	2	48004738	98.13	53770624	51362090	95.52	647	48917145	95.24	47004628	3570074807	3536668212	76	49.97	2066155446	40491869	72762	284273363	148445561	0.24	0.13	0.62	0.47	55.62	99.82	7.65	4	85.97	2.39	81.82	30.35	3715052084	3903518840	88728328	1127537569	pilot		1197V041211	IGTB1197	IGTB1197	TRUE	0.995205	baseline	2011-04-12	08:00:00	M	22	Caucasian
IGTB885_unstim_Exp1	Baseline	2	48244088	98.38	53446070	51243564	95.88	622	49038975	95.7	46882060	3561608259	3526333952	76	49.99	2030081569	39528886	78856	310273276	174949031	0.25	0.13	0.61	0.47	54.5	99.8	8.33	4.7	83.81	3.16	80.17	29.32	3725107828	3894510864	117795744	1092082562	pilot		1521V011112	IGTB1521	IGTB885	FALSE	0.995508	baseline	2010-06-01	07:53:00	M	47	Caucasian
IGTB677_unstim_Exp7	Baseline	2	39825248	98.02	44890954	42979744	95.74	505	40630242	94.53	38973699	2960489016	2931464753	76	49.98	1695562528	33363987	62241	241282627	127371214	0.25	0.14	0.67	0.46	54.94	99.81	7.82	4.13	85.36	2.7	80.64	30.41	3086018188	3266460544	83320776	938547651	pilot		0677V021611	IGTB677	IGTB677	TRUE	0.995768	baseline	2011-02-16	08:05:00	M	22	Caucasian
IGTB1273_unstim_Exp1	Baseline	2	44824160	98.18	50018086	47848768	95.66	545	45654455	95.41	43762860	3324242560	3291490792	76	49.97	1880852092	36772436	72387	282025383	185494290	0.25	0.14	0.65	0.46	54.24	99.8	8.13	5.35	83.69	2.83	79.81	29.45	3467607392	3636506368	97973424	1021344566	pilot		0665V011812	IGTB665	IGTB1273	FALSE	0.995961	baseline	2011-05-12	08:12:00	F	19	East Asian
IGTB843_unstim_Exp7	Baseline	2	40763882	98.3	44877564	43130024	96.11	509	41468013	96.15	40017675	3040126999	3013018722	76	49.99	1736421990	34530579	63449	238451201	119777387	0.25	0.12	0.54	0.47	55.12	99.82	7.57	3.8	86.58	2.05	83.2	31.45	3150048417	3277881824	64595136	990842163	pilot		0843V021711	IGTB843	IGTB843	TRUE	0.996266	baseline	2011-02-17	08:19:00	F	20	Caucasian
									3.79927e+07																				86.4253
[truncated: 9 more columns]
