# Supplementary material for: Genetic analysis of isoform usage in the human anti-viral response reveals influenza-specific regulation of ERAP2 transcripts under balancing selection
Source: Genome Res. 2018 Dec;28(12):1812–25. doi: 10.1101/gr.240390.118 (PMC6280757; doi:10.1101/gr.240390.118)
Supplement: Supplemental Material [file supp_gr.240390.118_SupplementalTable2.xlsx]

## Sheet: Sheet1
chr1	936322	949954	TCONS_00000004	0	+	936322	949954	255,0,0	4	321,86,154,591,	0,7251,12480,13041,
chr1	955466	991481	TCONS_00000005	0	+	955466	991481	255,0,0	36	287,262,48,216,225,225,207,219,195,201,149,106,117,165,144,125,106,339,138,128,115,120,354,193,216,230,135,97,165,112,117,193,88,225,104,1278,	0,2114,15190,20578,21086,21391,21869,23152,23451,23736,24022,24247,25074,25272,25646,25877,26073,26310,26733,27240,27486,27689,27925,28780,29149,29479,29816,30146,30340,30639,31166,31366,31641,33666,34361,34737,
chr1	955621	991481	TCONS_00000007	0	+	955621	991481	255,0,0	36	132,262,48,216,237,225,207,219,195,201,149,106,117,165,144,125,106,339,138,128,115,120,354,193,216,230,135,97,165,112,117,193,88,225,104,1278,	0,1959,15035,20423,20919,21236,21714,22997,23296,23581,23867,24092,24919,25117,25491,25722,25918,26155,26578,27085,27331,27534,27770,28625,28994,29324,29661,29991,30185,30484,31011,31211,31486,33511,34206,34582,
chr1	976854	991481	TCONS_00000008	0	+	976854	991481	255,0,0	31	228,207,219,195,201,149,106,117,165,144,125,106,339,138,128,115,120,354,193,216,230,135,97,165,112,117,193,88,225,104,1278,	0,481,1764,2063,2348,2634,2859,3686,3884,4258,4489,4685,4922,5345,5852,6098,6301,6537,7392,7761,8091,8428,8758,8952,9251,9778,9978,10253,12278,12973,13349,
chr1	980538	991481	TCONS_00000009	0	+	980538	991481	255,0,0	24	119,165,144,125,106,339,138,128,115,120,354,193,216,230,135,97,165,112,117,193,88,225,104,1278,	0,200,574,805,1001,1238,1661,2168,2414,2617,2853,3708,4077,4407,4744,5074,5268,5567,6094,6294,6569,8594,9289,9665,
chr1	320883	328541	TCONS_00000010_add	0	+	320883	328541	255,0,0	5	55,233,191,58,4103,	0,148,1154,3404,3555,
chr1	1407367	1431647	TCONS_00000012	0	+	1407367	1431647	255,0,0	16	102,77,102,60,70,166,70,156,57,126,125,52,71,168,109,783,	0,5286,6656,7061,8879,10150,10557,13028,13794,14122,14556,15875,17216,18269,18575,23497,
chr1	1420387	1431647	TCONS_00000013	0	+	1420387	1431647	255,0,0	9	164,57,126,125,52,71,168,109,783,	0,774,1102,1536,2855,4196,5249,5555,10477,
chr1	1447545	1470060	TCONS_00000014	0	+	1447545	1470060	255,0,0	16	308,77,102,60,70,166,70,156,57,126,125,52,71,168,109,755,	0,3846,5145,5550,6755,7975,8382,10578,11345,11673,12107,13074,14295,15529,17057,21760,
chr1	2160169	2241639	TCONS_00000016	0	+	2160169	2241639	255,0,0	7	1005,126,116,269,293,231,3624,	0,74247,74554,75109,75562,77289,77846,
chr1	2160497	2241639	TCONS_00000017	0	+	2160497	2241639	255,0,0	7	677,126,116,263,293,231,3624,	0,73919,74226,74781,75234,76961,77518,
chr1	2323251	2337440	TCONS_00000018	0	+	2323251	2337440	255,0,0	8	146,86,88,105,100,79,136,2967,	0,1457,3971,5303,7602,9044,10394,11222,
chr1	2323272	2337440	TCONS_00000020	0	+	2323272	2337440	255,0,0	7	125,88,105,100,79,136,2967,	0,3950,5282,7581,9023,10373,11201,
chr1	2323681	2337440	TCONS_00000021	0	+	2323681	2337440	255,0,0	7	1113,88,105,100,79,136,2967,	0,3541,4873,7172,8614,9964,10792,
chr1	2486950	2495297	TCONS_00000037	0	+	2486950	2495297	255,0,0	9	750,149,109,126,156,91,143,32,711,	0,1073,2214,2831,4311,5112,6161,7353,7636,
chr1	2486982	2495297	TCONS_00000038	0	+	2486982	2495297	255,0,0	5	1190,109,126,156,3235,	0,2182,2799,4279,5080,
chr1	2487077	2495297	TCONS_00000039	0	+	2487077	2495297	255,0,0	8	1095,109,126,1098,91,143,32,711,	0,2087,2704,3242,4985,6034,7226,7509,
chr1	2517968	2523079	TCONS_00000040	0	+	2517968	2523079	255,0,0	7	62,205,52,64,76,119,2231,	0,561,1211,1860,2020,2392,2880,
chr1	2517968	2523079	TCONS_00000041	0	+	2517968	2523079	255,0,0	7	62,205,52,64,76,87,2231,	0,561,1211,1860,2020,2424,2880,
chr1	2518232	2523079	TCONS_00000042	0	+	2518232	2523079	255,0,0	7	155,205,52,64,76,87,2231,	0,297,947,1596,1756,2160,2616,
chr1	2518245	2523079	TCONS_00000043	0	+	2518245	2523079	255,0,0	7	142,205,52,64,76,119,2231,	0,284,934,1583,1743,2115,2603,
chr1	3541556	3546693	TCONS_00000044	0	+	3541556	3546693	255,0,0	5	281,92,177,154,1721,	0,431,720,2507,3416,
chr1	3541986	3546693	TCONS_00000045	0	+	3541986	3546693	255,0,0	4	93,177,154,1721,	0,290,2077,2986,
chr1	6086315	6161354	TCONS_00000046	0	+	6086315	6161354	255,0,0	16	190,129,42,44,38,80,45,45,44,87,86,121,95,121,89,2810,	0,14261,15575,46499,47477,55939,58948,61211,62752,64133,68144,69067,69274,70380,71013,72229,
chr1	6086385	6161354	TCONS_00000047	0	+	6086385	6161354	255,0,0	15	120,129,44,38,80,45,45,44,87,86,121,95,121,89,2810,	0,14191,46429,47407,55869,58878,61141,62682,64063,68074,68997,69204,70310,70943,72159,
chr1	6640065	6649433	TCONS_00000049	0	+	6640065	6649433	255,0,0	11	65,759,242,112,93,87,155,137,165,89,458,	0,535,2052,5913,6689,7199,7472,8054,8272,8750,8910,
chr1	6640068	6649433	TCONS_00000050	0	+	6640068	6649433	255,0,0	11	128,759,242,112,93,87,155,137,165,89,458,	0,532,2049,5910,6686,7196,7469,8051,8269,8747,8907,
chr1	6640503	6649433	TCONS_00000051	0	+	6640503	6649433	255,0,0	10	856,242,112,93,87,155,137,165,89,458,	0,1614,5475,6251,6761,7034,7616,7834,8312,8472,
chr1	6684988	6694090	TCONS_00000053	0	+	6684988	6694090	255,0,0	6	26,143,193,66,105,1235,	0,221,3570,5359,7462,7867,
chr1	6684991	6694090	TCONS_00000054	0	+	6684991	6694090	255,0,0	6	23,124,193,66,105,1235,	0,237,3567,5356,7459,7864,
chr1	6845518	6932226	TCONS_00000055	0	+	6845518	6932226	255,0,0	3	117,119,410,	0,39633,86298,
chr1	6845521	6932226	TCONS_00000056	0	+	6845521	6932226	255,0,0	4	114,70,119,410,	0,34719,39630,86295,
chr1	7831344	7841598	TCONS_00000058	0	+	7831344	7841598	255,0,0	5	101,70,159,52,1913,	0,2157,5875,6833,8341,
chr1	8021658	8045427	TCONS_00000063	0	+	8021658	8045427	255,0,0	7	137,113,102,60,70,87,474,	0,1164,3725,7746,9295,16053,23295,
chr1	8021706	8045427	TCONS_00000064	0	+	8021706	8045427	255,0,0	7	147,113,102,60,70,87,474,	0,1116,3677,7698,9247,16005,23247,
chr1	8022821	8045427	TCONS_00000066	0	+	8022821	8045427	255,0,0	6	114,102,60,70,87,474,	0,2562,6583,8132,14890,22132,
chr1	9294817	9331393	TCONS_00000068	0	+	9294817	9331393	255,0,0	5	308,637,118,270,7826,	0,10166,12207,27300,28750,
chr1	9295025	9331393	TCONS_00000069	0	+	9295025	9331393	255,0,0	5	100,629,118,270,7826,	0,9966,11999,27092,28542,
chr1	9299559	9331393	TCONS_00000070	0	+	9299559	9331393	255,0,0	5	518,637,118,270,7826,	0,5424,7465,22558,24008,
chr1	9299905	9331393	TCONS_00000071	0	+	9299905	9331393	255,0,0	5	172,629,118,270,7826,	0,5086,7119,22212,23662,
chr1	9304906	9331393	TCONS_00000072	0	+	9304906	9331393	255,0,0	4	714,118,270,7826,	0,2118,17211,18661,
chr1	9352960	9429591	TCONS_00000073	0	+	9352960	9429591	255,0,0	3	170,843,2085,	0,62841,74546,
chr1	9415800	9429591	TCONS_00000079	0	+	9415800	9429591	255,0,0	2	844,2085,	0,11706,
chr1	9711773	9791107	TCONS_00000084	0	+	9711773	9791107	255,0,0	24	87,105,173,229,230,180,150,90,222,97,131,51,165,122,144,100,179,113,79,168,124,146,133,4141,	0,39751,58708,63825,64133,64724,65243,65821,66978,68205,68396,68895,69029,69411,69728,70045,70259,70528,70812,71409,72253,72560,73088,75193,
chr1	9711800	9791107	TCONS_00000085	0	+	9711800	9791107	255,0,0	24	60,105,173,229,230,180,150,90,222,97,131,51,168,122,144,100,179,113,79,168,124,146,133,4141,	0,39724,58681,63798,64106,64697,65216,65794,66951,68178,68369,68868,68999,69384,69701,70018,70232,70501,70785,71382,72226,72533,73061,75166,
chr1	9749762	9791107	TCONS_00000088	0	+	9749762	9791107	255,0,0	24	17,105,173,229,230,180,150,90,222,97,131,51,168,122,144,100,179,113,79,168,124,146,133,4141,	0,1762,20719,25836,26144,26735,27254,27832,28989,30216,30407,30906,31037,31422,31739,32056,32270,32539,32823,33420,34264,34571,35099,37204,
chr1	10270862	10457137	TCONS_00000099	0	+	10270862	10457137	255,0,0	47	74,185,77,180,66,179,112,78,66,76,79,143,134,80,76,80,107,84,181,73,94,149,179,138,119,86,130,163,91,119,56,109,67,85,106,115,134,62,146,240,72,122,150,193,119,5097,53,	0,21445,45442,47688,51100,56575,57347,60697,61436,64623,65516,67181,71595,80277,81242,84281,84855,85777,86092,86369,109238,110904,113079,113953,123715,125852,126269,126566,128964,131245,132427,135040,136956,137844,141826,150124,150887,152478,154295,154604,157662,160336,163511,164049,164450,165740,186222,
chr1	10292306	10368649	TCONS_00000102	0	+	10292306	10368649	255,0,0	20	186,77,180,66,179,112,78,66,76,79,143,134,80,76,80,107,84,181,73,5429,	0,23998,26244,29656,35131,35903,39253,39992,43179,44072,45737,50151,58833,59798,62837,63411,64333,64648,64925,70914,
chr1	10459060	10480664	TCONS_00000104	0	+	10459060	10480664	255,0,0	13	122,76,180,66,119,70,135,190,131,134,100,123,978,	0,625,1389,4067,5157,9067,12414,14058,17983,18372,19822,20413,20626,
chr1	11072687	11090550	TCONS_00000107	0	+	11072687	11090550	255,0,0	7	113,250,164,141,171,3085,807,	0,1085,4213,6102,7798,9493,17056,
chr1	11724164	11734935	TCONS_00000113	0	+	11724164	11734935	255,0,0	6	148,289,127,96,136,1264,	0,4548,7158,7820,9169,9507,
chr1	11796178	11811109	TCONS_00000116	0	+	11796178	11811109	255,0,0	5	114,35,106,175,976,	0,9681,11318,12293,13955,
chr1	11796184	11811109	TCONS_00000117	0	+	11796184	11811109	255,0,0	5	108,35,106,196,976,	0,9675,11312,12287,13949,
chr1	11994741	12035802	TCONS_00000119	0	+	11994741	12035802	255,0,0	19	171,92,134,164,113,64,98,102,132,122,105,126,142,114,66,105,147,126,1093,	0,13291,15088,15672,17938,20145,22232,23157,23831,25961,28847,29490,29959,30795,31566,32302,35985,38187,39968,
chr1	12040090	12073560	TCONS_00000122	0	+	12040090	12073560	255,0,0	19	451,145,179,136,163,125,109,108,154,68,122,127,105,103,221,156,197,135,2008,	0,1936,9131,12521,16122,17263,18736,18954,21367,21735,21948,23958,24475,24791,25677,26504,27019,29558,31462,
chr1	12040239	12073560	TCONS_00000123	0	+	12040239	12073560	255,0,0	19	302,305,179,136,163,125,109,108,154,68,122,127,105,103,221,156,197,135,2008,	0,1627,8982,12372,15973,17114,18587,18805,21218,21586,21799,23809,24326,24642,25528,26355,26870,29409,31313,
chr1	12040324	12073560	TCONS_00000124	0	+	12040324	12073560	255,0,0	20	217,44,145,179,136,163,125,109,108,154,68,122,127,105,103,221,156,197,135,2008,	0,1542,1702,8897,12287,15888,17029,18502,18720,21133,21501,21714,23724,24241,24557,25443,26270,26785,29324,31228,
chr1	12079500	12092548	TCONS_00000125	0	+	12079500	12092548	255,0,0	10	109,196,348,85,109,59,130,97,138,770,	0,2201,2651,3389,9589,9779,10321,10584,11822,12278,
chr1	12227165	12269715	TCONS_00000126	0	+	12227165	12269715	255,0,0	10	61,100,129,150,94,236,78,35,205,2919,	0,21687,23848,24665,25322,25754,26846,27475,34858,39631,
chr1	12290120	12572096	TCONS_00000128	0	+	12290120	12572096	255,0,0	69	57,173,78,191,81,117,105,171,101,169,102,202,180,131,76,171,131,133,2214,152,1032,91,127,181,183,223,211,172,113,213,266,134,156,211,75,207,90,141,123,103,153,136,48,151,211,248,192,127,143,131,176,124,236,109,164,109,180,114,150,150,97,149,135,168,133,196,132,241,3150,	0,4127,12449,14182,14473,19159,23658,26269,26923,27871,30629,30884,31837,36817,37781,38642,40930,42939,45761,49435,52641,58159,60934,63460,69138,74442,78367,81390,81749,84051,88008,89433,91745,92472,93642,97584,99765,103162,105641,111719,112835,115310,116541,118759,119100,123910,125835,126334,128394,132655,133007,138402,139401,143684,148361,149421,152914,155198,156123,170117,171540,173757,185019,…
chr1	12404558	12572096	TCONS_00000129	0	+	12404558	12572096	255,0,0	29	509,136,48,151,211,248,192,127,143,131,176,124,236,109,164,109,180,114,150,150,97,149,135,168,133,196,132,241,3150,	0,872,2103,4321,4662,9472,11397,11896,13956,18217,18569,23964,24963,29246,33923,34983,38476,40760,41685,55679,57102,59319,70581,72154,111495,115697,152995,162348,164388,
chr1	12476422	12572096	TCONS_00000130	0	+	12476422	12572096	255,0,0	6	458,133,196,132,241,3150,	0,39631,43833,81131,90484,92524,
chr1	13910105	13944443	TCONS_00000131	0	+	13910105	13944443	255,0,0	6	490,134,130,39,112,2044,	0,23562,26776,30076,30689,32294,
chr1	14042051	14151585	TCONS_00000137	0	+	14042051	14151585	255,0,0	9	58,118,104,153,127,111,4414,144,1932,	0,15443,17222,26448,33804,57521,62861,100870,107602,
chr1	14057495	14114741	TCONS_00000140	0	+	14057495	14114741	255,0,0	6	117,153,127,111,4414,1732,	0,11004,18360,42077,47417,55514,
chr1	15478746	15547113	TCONS_00000141	0	+	15478746	15547113	255,0,0	4	534,73,537,1292,	0,58239,62644,67075,
chr1	15479663	15547113	TCONS_00000143	0	+	15479663	15547113	255,0,0	4	71,73,537,1292,	0,57322,61727,66158,
chr1	15480216	15547113	TCONS_00000144	0	+	15480216	15547113	255,0,0	3	234,537,1292,	0,61174,65605,
chr1	15480276	15547113	TCONS_00000145	0	+	15480276	15547113	255,0,0	4	174,73,537,1292,	0,56709,61114,65545,
chr1	15515359	15547113	TCONS_00000146	0	+	15515359	15547113	255,0,0	4	66,73,537,1292,	0,21626,26031,30462,
chr1	15736386	15756926	TCONS_00000148	0	+	15736386	15756926	255,0,0	4	389,148,135,1838,	0,15980,17259,18702,
chr1	15943955	15995658	TCONS_00000149	0	+	15943955	15995658	255,0,0	10	348,130,237,127,128,129,104,190,63,9327,	0,9208,12864,15978,20846,26061,32259,34245,39156,42376,
chr1	16011026	16061479	TCONS_00000154	0	+	16011026	16061479	255,0,0	20	87,107,110,100,88,187,60,229,55,70,91,65,89,133,191,66,160,180,117,1188,	0,31705,32175,33361,34006,35202,36797,40785,42482,43547,43735,44137,44570,45265,46000,46660,47357,47818,48080,49265,
chr1	16011046	16061479	TCONS_00000158	0	+	16011046	16061479	255,0,0	19	67,107,110,100,88,187,229,819,70,91,65,89,133,191,66,160,180,117,1188,	0,31685,32155,33341,33986,35182,40765,42462,43527,43715,44117,44550,45245,45980,46640,47337,47798,48060,49245,
chr1	16163832	16268748	TCONS_00000160	0	+	16163832	16268748	255,0,0	15	138,321,477,161,201,152,126,114,114,101,8176,483,195,159,2958,	0,35478,38864,71983,73763,78790,81588,82066,83532,84911,90753,99825,100474,101380,101958,
chr1	16163857	16268748	TCONS_00000161	0	+	16163857	16268748	255,0,0	14	113,321,161,201,152,126,114,114,101,8176,483,195,159,2958,	0,35453,71958,73738,78765,81563,82041,83507,84886,90728,99800,100449,101355,101933,
chr1	16174347	16268748	TCONS_00000162	0	+	16174347	16268748	255,0,0	15	298,321,477,161,201,152,126,114,114,101,8176,483,195,159,2958,	0,24963,28349,61468,63248,68275,71073,71551,73017,74396,80238,89310,89959,90865,91443,
chr1	16174522	16268748	TCONS_00000164	0	+	16174522	16268748	255,0,0	15	123,1580,477,161,201,152,126,114,114,101,8176,483,195,159,2958,	0,24788,28174,61293,63073,68100,70898,71376,72842,74221,80063,89135,89784,90690,91268,
chr1	16693606	16724742	TCONS_00000165	0	+	16693606	16724742	255,0,0	3	197,255,3210,	0,26116,27926,
chr1	16693606	16724742	TCONS_00000166	0	+	16693606	16724742	255,0,0	3	197,252,3210,	0,26119,27926,
chr1	16693628	16724742	TCONS_00000167	0	+	16693628	16724742	255,0,0	4	175,50,255,3210,	0,24241,26094,27904,
chr1	16693653	16724742	TCONS_00000168	0	+	16693653	16724742	255,0,0	4	150,50,252,3210,	0,24216,26072,27879,
chr1	16693726	16724742	TCONS_00000169	0	+	16693726	16724742	255,0,0	5	77,50,255,334,2825,	0,24143,25996,27806,28191,
chr1	16693728	16724742	TCONS_00000170	0	+	16693728	16724742	255,0,0	4	75,255,2152,996,	0,25994,27804,30018,
chr1	16766211	16786595	TCONS_00000175	0	+	16766211	16786595	255,0,0	9	30,235,101,105,82,109,178,76,1259,	0,902,3915,8153,8343,9376,12121,16101,19125,
chr1	17944824	18024439	TCONS_00000179	0	+	17944824	18024439	255,0,0	20	193,107,78,180,117,93,174,146,182,116,128,101,122,87,224,155,149,175,123,1097,	0,1009,3534,4666,6057,7626,9000,13991,16505,19558,20232,21872,30224,36306,37549,38224,46117,69243,76828,78518,
chr1	19578165	19587386	TCONS_00000180	0	+	19578165	19587386	255,0,0	8	192,59,104,82,68,152,77,2212,	0,3110,4276,5392,5782,6161,6805,7009,
chr1	19919309	19953126	TCONS_00000183	0	+	19919309	19953126	255,0,0	4	4294,48,110,246,	0,29284,30658,33571,
chr1	19970105	19985129	TCONS_00000185	0	+	19970105	19985129	255,0,0	4	14,189,112,1771,	0,11399,11711,13253,
chr1	19970217	19985129	TCONS_00000187	0	+	19970217	19985129	255,0,0	4	231,189,112,1771,	0,11287,11599,13141,
chr1	19970861	19985129	TCONS_00000188	0	+	19970861	19985129	255,0,0	4	79,189,112,1771,	0,10643,10955,12497,
chr1	20915412	20945397	TCONS_00000192	0	+	20915412	20945397	255,0,0	4	364,112,58,453,	0,16008,24922,29532,
chr1	20960023	20978985	TCONS_00000193	0	+	20960023	20978985	255,0,0	8	405,288,101,183,164,128,237,2059,	0,4311,6361,10959,12029,14974,15464,16903,
chr1	22351824	22357967	TCONS_00000194	0	+	22351824	22357967	255,0,0	2	41,1195,	0,4948,
chr1	22351988	22357967	TCONS_00000195	0	+	22351988	22357967	255,0,0	2	148,1195,	0,4784,
chr1	22379132	22419533	TCONS_00000197	0	+	22379132	22419533	255,0,0	6	103,155,73,110,198,1613,	0,25789,29082,33799,34029,38788,
chr1	22962747	22966115	TCONS_00000199	0	+	22962747	22966115	255,0,0	2	448,790,	0,2578,
chr1	22962747	22966115	TCONS_00000200	0	+	22962747	22966115	255,0,0	3	448,170,790,	0,1355,2578,
chr1	22962888	22966115	TCONS_00000201	0	+	22962888	22966115	255,0,0	3	307,190,790,	0,1194,2437,
chr1	22969956	22974599	TCONS_00000202	0	+	22969956	22974599	255,0,0	3	251,194,880,	0,547,3763,
chr1	22970077	22974599	TCONS_00000203	0	+	22970077	22974599	255,0,0	3	153,194,880,	0,426,3642,
chr1	22979629	22989215	TCONS_00000204	0	+	22979629	22989215	255,0,0	3	167,204,1911,	0,6303,7675,
chr1	23036012	23242129	TCONS_00000205	0	+	23036012	23242129	255,0,0	16	34,65,685,156,336,125,163,109,65,123,248,216,150,194,156,2175,	0,71901,74872,153517,155357,172839,183364,185952,186894,196467,197190,198433,199502,200862,202924,203942,
chr1	23037430	23242129	TCONS_00000206	0	+	23037430	23242129	255,0,0	16	106,65,685,156,336,125,163,109,65,123,248,216,150,194,156,2175,	0,70483,73454,152099,153939,171421,181946,184534,185476,195049,195772,197015,198084,199444,201506,202524,
chr1	23345962	23415548	TCONS_00000207	0	+	23345962	23415548	255,0,0	20	478,166,60,134,79,93,107,82,95,143,91,135,74,112,133,188,115,128,147,5877,	0,10999,24957,30917,34291,35599,36462,38014,39603,49069,49591,51755,52654,53822,57758,59520,60083,61976,62750,63709,
chr1	23345972	23415548	TCONS_00000208	0	+	23345972	23415548	255,0,0	19	468,166,134,79,93,107,82,95,143,91,135,74,112,133,188,115,128,147,5877,	0,10989,30907,34281,35589,36452,38004,39593,49059,49581,51745,52644,53812,57748,59510,60073,61966,62740,63699,
chr1	23345977	23415548	TCONS_00000209	0	+	23345977	23415548	255,0,0	19	463,166,60,134,79,93,107,82,95,143,91,135,74,112,133,188,115,921,5877,	0,10984,24942,30902,34276,35584,36447,37999,39588,49054,49576,51740,52639,53807,57743,59505,60068,61961,63694,
chr1	24018284	24022950	TCONS_00000215	0	+	24018284	24022950	255,0,0	6	35,151,107,132,111,117,	0,814,2012,2865,4003,4549,
chr1	1628767	1631703	TCONS_00000216_add	0	+	1628767	1631703	255,0,0	4	136,590,131,125,	0,1641,2613,2811,
chr1	24069971	24088895	TCONS_00000217	0	+	24069971	24088895	255,0,0	11	97,57,107,1186,112,156,98,181,112,173,2894,	0,5539,6360,7363,8925,10618,10881,12361,12792,13471,16030,
chr1	1628849	1631703	TCONS_00000217_add	0	+	1628849	1631703	255,0,0	4	54,684,131,125,	0,1465,2531,2729,
chr1	24105038	24115039	TCONS_00000219	0	+	24105038	24115039	255,0,0	6	165,44,78,105,109,1275,	0,889,1315,7126,7766,8726,
chr1	24117540	24122461	TCONS_00000220	0	+	24117540	24122461	255,0,0	10	200,104,32,66,48,71,74,102,174,1290,	0,1606,1957,2100,2654,2809,3012,3173,3376,3631,
chr1	24286204	24289988	TCONS_00000222	0	+	24286204	24289988	255,0,0	3	284,206,2059,	0,1214,1725,
chr1	24286303	24289988	TCONS_00000223	0	+	24286303	24289988	255,0,0	3	185,202,2059,	0,1119,1626,
chr1	24828871	24867513	TCONS_00000225	0	+	24828871	24867513	255,0,0	5	82,254,174,172,5931,	0,11932,28836,30701,32711,
chr1	24829501	24867513	TCONS_00000226	0	+	24829501	24867513	255,0,0	5	106,254,174,172,5931,	0,11302,28206,30071,32081,
chr1	24829529	24867513	TCONS_00000227	0	+	24829529	24867513	255,0,0	5	111,254,174,172,5931,	0,11274,28178,30043,32053,
chr1	24969702	24999966	TCONS_00000230	0	+	24969702	24999966	255,0,0	18	136,90,123,171,116,204,195,120,275,81,87,145,42,111,465,196,210,1294,	0,2772,3455,5647,6759,8197,9222,9701,11643,17507,18098,19448,19971,23603,25911,26908,28174,28970,
chr1	24969743	24999966	TCONS_00000233	0	+	24969743	24999966	255,0,0	17	95,90,123,171,116,204,195,120,269,81,87,145,111,465,196,210,1294,	0,2731,3414,5606,6718,8156,9181,9660,11602,17466,18057,19407,23562,25870,26867,28133,28929,
chr1	24969773	24999966	TCONS_00000234	0	+	24969773	24999966	255,0,0	18	65,90,123,130,171,116,204,195,120,275,81,87,145,111,465,196,210,1294,	0,2701,3384,3796,5576,6688,8126,9151,9630,11572,17436,18027,19377,23532,25840,26837,28103,28899,
chr1	24969773	24999966	TCONS_00000235	0	+	24969773	24999966	255,0,0	18	65,90,123,171,116,204,195,120,269,81,87,145,42,111,465,196,210,1294,	0,2701,3384,5576,6688,8126,9151,9630,11572,17436,18027,19377,19900,23532,25840,26837,28103,28899,
chr1	24969775	24999966	TCONS_00000236	0	+	24969775	24999966	255,0,0	18	63,90,123,171,116,204,195,120,275,81,84,145,42,111,465,196,210,1294,	0,2699,3382,5574,6686,8124,9149,9628,11570,17434,18028,19375,19898,23530,25838,26835,28101,28897,
chr1	25071778	25171435	TCONS_00000238	0	+	25071778	25171435	255,0,0	6	338,110,126,107,182,4172,	0,52454,68806,81722,94572,95485,
chr1	25664774	25689106	TCONS_00000239	0	+	25664774	25689106	255,0,0	7	173,106,113,68,93,61,1956,	0,2190,4677,13342,14598,18509,22376,
chr1	25757413	25826689	TCONS_00000242	0	+	25757413	25826689	255,0,0	11	256,142,127,124,179,502,159,183,121,175,1935,	0,15839,17885,23336,25730,27468,53193,54690,58250,60487,67341,
chr1	25944058	26123410	TCONS_00000247	0	+	25944058	26123410	255,0,0	13	770,97,116,81,95,118,94,116,220,173,116,1135,36,	0,68872,129100,131687,135916,141024,146306,154089,160537,163372,165017,166095,179316,
chr1	26126846	26144910	TCONS_00000249	0	+	26126846	26144910	255,0,0	12	58,118,134,210,125,138,82,189,106,113,102,2872,	0,687,4786,8224,8670,9327,11098,11335,12331,13525,13721,15192,
chr1	26146413	26159967	TCONS_00000251	0	+	26146413	26159967	255,0,0	7	107,110,105,110,212,322,1556,	0,3096,3721,6379,6692,9586,11998,
chr1	26496398	26497463	TCONS_00000253	0	+	26496398	26497463	255,0,0	3	276,63,398,	0,510,667,
chr1	26606518	26608111	TCONS_00000255	0	+	26606518	26608111	255,0,0	3	176,168,563,	0,737,1030,
chr1	26635125	26647015	TCONS_00000257	0	+	26635125	26647015	255,0,0	3	23,137,354,	0,9300,11536,
chr1	26758825	26798790	TCONS_00000259	0	+	26758825	26798790	255,0,0	9	42,118,117,143,117,102,115,108,3405,	0,556,5833,10396,13981,15224,25456,27702,36560,
chr1	26798943	26803096	TCONS_00000260	0	+	26798943	26803096	255,0,0	6	175,45,30,51,96,1493,	0,1030,1250,1632,2119,2660,
chr1	26856345	26901602	TCONS_00000262	0	+	26856345	26901602	255,0,0	22	129,45,117,82,81,80,107,38,143,71,89,65,103,131,126,90,159,162,77,118,138,1033,	0,7070,17012,17334,21542,21789,23536,24359,24741,25296,25682,26799,27143,28952,30871,31190,31650,41594,41994,42321,43369,44224,
chr1	26872250	26901602	TCONS_00000267	0	+	26872250	26901602	255,0,0	21	276,117,82,81,80,107,38,143,71,89,65,103,131,126,90,159,162,77,118,138,1033,	0,1107,1429,5637,5884,7631,8454,8836,9391,9777,10894,11238,13047,14966,15285,15745,25689,26089,26416,27464,28319,
chr1	27015433	27108593	TCONS_00000269	0	+	27015433	27108593	255,0,0	20	25,213,453,117,241,90,168,313,146,110,210,208,133,173,151,138,97,892,131,3080,	0,40708,42209,43733,71913,72441,73209,74030,77278,77514,78847,82176,83557,83872,84403,84637,84859,85386,86634,90080,
chr1	27016814	27108593	TCONS_00000270	0	+	27016814	27108593	255,0,0	20	42,213,453,117,241,90,168,313,146,110,210,208,133,176,151,138,97,892,131,3080,	0,39327,40828,42352,70532,71060,71828,72649,75897,76133,77466,80795,82176,82488,83022,83256,83478,84005,85253,88699,
chr1	27022521	27108593	TCONS_00000275	0	+	27022521	27108593	255,0,0	20	70,213,453,117,241,90,168,313,146,110,210,208,133,176,151,138,97,892,131,3080,	0,33620,35121,36645,64825,65353,66121,66942,70190,70426,71759,75088,76469,76781,77315,77549,77771,78298,79546,82992,
chr1	27153456	27182601	TCONS_00000280	0	+	27153456	27182601	255,0,0	8	174,161,150,138,49,103,113,2385,	0,5481,21642,23335,23592,24163,25787,26760,
chr1	27248233	27273354	TCONS_00000281	0	+	27248233	27273354	255,0,0	9	187,78,204,66,117,195,84,119,734,	0,2346,19714,20010,20917,21128,23647,23825,24387,
chr1	27561031	27635149	TCONS_00000282	0	+	27561031	27635149	255,0,0	16	411,147,84,47,112,188,183,95,116,76,109,174,236,175,193,2473,	0,26415,28611,47698,48797,53133,57674,59481,59973,61785,62507,63397,66685,69080,70460,71645,
chr1	27587445	27635149	TCONS_00000283	0	+	27587445	27635149	255,0,0	15	148,84,47,112,188,183,95,116,76,109,174,236,175,193,2473,	0,2197,21284,22383,26719,31260,33067,33559,35371,36093,36983,40271,42666,44046,45231,
chr1	27648648	27662890	TCONS_00000284	0	+	27648648	27662890	255,0,0	6	234,85,32,97,131,1021,	0,8562,9912,11800,11993,13221,
chr1	28099658	28151022	TCONS_00000286	0	+	28099658	28151022	255,0,0	9	278,70,100,138,44,106,73,83,2281,	0,16414,20385,28530,37098,39015,44703,46502,49083,
chr1	28099713	28151022	TCONS_00000287	0	+	28099713	28151022	255,0,0	10	223,70,100,138,173,44,106,73,83,2281,	0,16359,20330,28475,31773,37043,38960,44648,46447,49028,
chr1	28157282	28178741	TCONS_00000288	0	+	28157282	28178741	255,0,0	7	120,61,154,221,145,65,2138,	0,1984,7927,10242,12414,16256,19321,
chr1	28199050	28213693	TCONS_00000290	0	+	28199050	28213693	255,0,0	6	126,141,411,1073,157,1316,	0,4048,7104,9431,12755,13327,
chr1	28199064	28213693	TCONS_00000291	0	+	28199064	28213693	255,0,0	4	112,141,157,1316,	0,4034,12741,13313,
chr1	28562528	28564609	TCONS_00000293	0	+	28562528	28564609	255,0,0	3	253,92,262,	0,343,1819,
chr1	28585942	28608990	TCONS_00000294	0	+	28585942	28608990	255,0,0	10	506,66,198,183,213,151,119,191,145,1764,	0,9751,12242,12852,13149,13926,14608,15393,19665,21284,
chr1	28595692	28608990	TCONS_00000295	0	+	28595692	28608990	255,0,0	9	67,198,183,213,151,119,191,145,1764,	0,2492,3102,3399,4176,4858,5643,9915,11534,
chr1	28696087	28826937	TCONS_00000297	0	+	28696087	28826937	255,0,0	14	249,54,174,81,165,387,598,185,154,56,62,138,77,3892,	0,37833,89508,90635,96108,96805,103978,106531,110875,119594,121375,122074,123439,126958,
chr1	28764632	28826937	TCONS_00000298	0	+	28764632	28826937	255,0,0	13	309,174,81,165,387,598,185,154,56,62,138,77,3892,	0,20963,22090,27563,28260,35433,37986,42330,51049,52830,53529,54894,58413,
chr1	28764645	28826937	TCONS_00000299	0	+	28764645	28826937	255,0,0	15	296,174,81,165,387,279,598,185,154,56,121,62,138,77,3892,	0,20950,22077,27550,28247,33485,35420,37973,42317,51036,51640,52817,53516,54881,58400,
chr1	28832507	28865867	TCONS_00000300	0	+	28832507	28865867	255,0,0	13	89,33,76,143,82,188,180,97,123,156,120,153,1524,	0,2132,2834,10729,23862,25807,26175,29054,29262,29875,30266,30751,31836,
chr1	28832526	28865867	TCONS_00000302	0	+	28832526	28865867	255,0,0	14	70,33,76,143,82,51,188,180,97,123,156,120,153,1524,	0,2113,2815,10710,23843,24508,25788,26156,29035,29243,29856,30247,30732,31817,
chr1	28832564	28837696	TCONS_00000303	0	+	28832564	28837696	255,0,0	4	32,33,925,77,	0,2075,2777,5055,
chr1	28844491	28865867	TCONS_00000304	0	+	28844491	28865867	255,0,0	10	329,82,188,180,97,123,156,120,153,1524,	0,11878,13823,14191,17070,17278,17891,18282,18767,19852,
chr1	28879589	28905896	TCONS_00000305	0	+	28879589	28905896	255,0,0	9	60,98,100,53,132,120,163,34,1885,	0,562,7555,8268,11625,14216,18098,18789,24422,
chr1	28879607	28905896	TCONS_00000306	0	+	28879607	28905896	255,0,0	10	42,98,100,53,132,120,163,34,374,1184,	0,544,7537,8250,11607,14198,18080,18771,24404,25105,
chr1	28919032	28923243	TCONS_00000309	0	+	28919032	28923243	255,0,0	2	224,3038,	0,1173,
chr1	29063387	29096287	TCONS_00000310	0	+	29063387	29096287	255,0,0	4	272,25,80,847,	0,782,1383,32053,
chr1	29213636	29447061	TCONS_00000311	0	+	29213636	29447061	255,0,0	18	86,458,213,105,43,76,219,88,153,98,173,206,177,129,102,81,105,3731,	0,100323,106205,110090,124740,128567,131099,143275,145968,148701,152129,165982,177857,210682,222211,225243,228574,229694,
chr1	29213637	29447061	TCONS_00000312	0	+	29213637	29447061	255,0,0	18	85,458,213,105,43,76,219,88,153,98,173,209,177,129,102,81,105,3731,	0,100322,106204,110089,124739,128566,131098,143274,145967,148700,152128,165978,177856,210681,222210,225242,228573,229693,
chr1	31769839	31838841	TCONS_00000314	0	+	31769839	31838841	255,0,0	8	83,121,58,101,92,101,146,1963,	0,13051,22116,40182,41964,49647,51836,67039,
chr1	31769867	31838841	TCONS_00000315	0	+	31769867	31838841	255,0,0	8	193,121,58,101,92,101,146,1963,	0,13023,22088,40154,41936,49619,51808,67011,
chr1	31886024	31907520	TCONS_00000316	0	+	31886024	31907520	255,0,0	10	127,162,191,80,138,170,91,142,219,610,	0,10515,11505,12152,12598,13476,15800,16219,19789,20886,
chr1	31896487	31907520	TCONS_00000317	0	+	31896487	31907520	255,0,0	9	214,191,80,138,170,91,142,219,610,	0,1042,1689,2135,3013,5337,5756,9326,10423,
chr1	32479451	32509538	TCONS_00000319	0	+	32479451	32509538	255,0,0	10	252,200,125,117,147,134,202,68,59,1411,	0,327,16447,17673,19337,23059,23984,24701,25664,28676,
chr1	32573439	32642328	TCONS_00000321	0	+	32573439	32642328	255,0,0	15	34,86,134,93,100,95,132,89,100,164,79,126,128,179,6021,	0,210,46749,49014,49507,50428,51561,52776,54108,54522,55396,58266,59330,62043,62868,
chr1	32573605	32642328	TCONS_00000322	0	+	32573605	32642328	255,0,0	14	130,134,93,100,95,132,89,100,164,79,126,128,179,6021,	0,46583,48848,49341,50262,51395,52610,53942,54356,55230,58100,59164,61877,62702,
chr1	32605416	32642328	TCONS_00000323	0	+	32605416	32642328	255,0,0	14	49,134,93,100,95,132,89,100,164,79,126,128,179,6021,	0,14772,17037,17530,18451,19584,20799,22131,22545,23419,26289,27353,30066,30891,
chr1	32645041	32664110	TCONS_00000324	0	+	32645041	32664110	255,0,0	11	336,201,336,92,171,195,120,75,93,96,3608,	0,873,1801,5084,8513,10614,12870,13216,13767,14624,15461,
chr1	32645644	32664110	TCONS_00000325	0	+	32645644	32664110	255,0,0	10	471,336,92,171,195,120,75,93,96,3608,	0,1198,4481,7910,10011,12267,12613,13164,14021,14858,
chr1	32666098	32670985	TCONS_00000326	0	+	32666098	32670985	255,0,0	6	212,187,167,194,23,191,	0,1415,3381,3688,4100,4696,
chr1	32687907	32697230	TCONS_00000328	0	+	32687907	32697230	255,0,0	11	138,93,88,66,150,128,111,90,74,93,515,	0,231,1727,2103,3864,4096,6192,6420,6828,8620,8808,
chr1	32716776	32751759	TCONS_00000330	0	+	32716776	32751759	255,0,0	13	196,110,82,91,99,104,150,153,180,77,154,132,645,	0,23149,23561,23817,24145,24393,24738,25161,25431,28495,28665,28903,34338,
chr1	32739908	32751759	TCONS_00000331	0	+	32739908	32751759	255,0,0	11	127,82,91,99,104,150,180,77,154,132,645,	0,429,685,1013,1261,1606,2299,5363,5533,5771,11206,
chr1	32757701	32800859	TCONS_00000332	0	+	32757701	32800859	255,0,0	14	118,113,118,75,139,142,93,109,141,109,131,153,49,2242,	0,10520,24564,32378,34838,35435,36967,38477,38667,39373,39575,39989,40600,40916,
chr1	33116769	33149395	TCONS_00000333	0	+	33116769	33149395	255,0,0	12	154,148,146,174,116,161,127,78,77,58,111,4155,	0,745,6258,17056,17570,17803,18062,18317,21281,21473,21622,28471,
chr1	33207572	33241693	TCONS_00000335	0	+	33207572	33241693	255,0,0	7	218,171,56,124,114,2562,3228,	0,25815,26090,26680,27701,27908,30893,
chr1	35734288	35888139	TCONS_00000341	0	+	35734288	35888139	255,0,0	31	398,62,46,522,62,171,85,256,175,213,151,116,276,151,173,151,141,38,145,119,169,54,180,95,172,96,152,112,249,130,3069,	0,27239,56672,90237,92506,92931,101341,101684,112571,112858,116754,117386,118315,118766,120222,121260,123524,123959,124907,127864,128689,129725,130176,130794,136335,136685,139320,145284,146778,149755,150782,
chr1	35734296	35888139	TCONS_00000342	0	+	35734296	35888139	255,0,0	30	390,46,522,62,171,85,256,175,213,151,116,276,151,173,151,141,38,145,119,169,54,180,95,172,96,152,112,249,130,3069,	0,56664,90229,92498,92923,101333,101676,112563,112850,116746,117378,118307,118758,120214,121252,123516,123951,124899,127856,128681,129717,130168,130786,136327,136677,139312,145276,146770,149747,150774,
chr1	35750286	35888139	TCONS_00000347	0	+	35750286	35888139	255,0,0	31	21,62,46,522,62,171,85,256,175,213,151,116,276,151,173,151,141,38,145,119,169,54,180,95,172,96,152,112,249,130,3069,	0,11241,40674,74239,76508,76933,85343,85686,96573,96860,100756,101388,102317,102768,104224,105262,107526,107961,108909,111866,112691,113727,114178,114796,120337,120687,123322,129286,130780,133757,134784,
chr1	36273239	36323879	TCONS_00000348	0	+	36273239	36323879	255,0,0	18	85,166,121,182,137,135,88,148,120,129,134,185,160,316,135,102,200,4782,	0,9243,15223,17674,18040,18287,19109,23788,24173,24418,24798,26351,28195,33526,33977,42518,43215,45858,
chr1	36273993	36323879	TCONS_00000349	0	+	36273993	36323879	255,0,0	18	43,166,121,182,137,135,88,148,120,129,134,185,160,316,135,102,200,4782,	0,8489,14469,16920,17286,17533,18355,23034,23419,23664,24044,25597,27441,32772,33223,41764,42461,45104,
chr1	36282481	36323879	TCONS_00000350	0	+	36282481	36323879	255,0,0	17	167,121,182,137,135,88,148,120,129,134,185,160,316,135,102,200,4782,	0,5981,8432,8798,9045,9867,14546,14931,15176,15556,17109,18953,24284,24735,33276,33973,36616,
chr1	36554464	36559531	TCONS_00000351	0	+	36554464	36559531	255,0,0	6	252,97,208,185,101,834,	0,2380,2754,3046,3558,4233,
chr1	36621323	36646570	TCONS_00000353	0	+	36621323	36646570	255,0,0	17	11,345,69,164,115,123,164,146,329,178,139,105,54,43,91,194,722,	0,15248,15790,16741,17641,20476,20695,20974,22150,22696,22962,23198,23539,23792,23943,24151,24525,
chr1	36627014	36646570	TCONS_00000374	0	+	36627014	36646570	255,0,0	18	73,345,69,164,115,111,123,164,146,329,178,139,105,54,43,91,194,722,	0,9557,10099,11050,11950,13484,14785,15004,15283,16459,17005,17271,17507,17848,18101,18252,18460,18834,
chr1	36642296	36646570	TCONS_00000376	0	+	36642296	36646570	255,0,0	10	147,329,151,139,105,54,43,91,194,722,	0,1177,1750,1989,2225,2566,2819,2970,3178,3552,
chr1	36689943	36771053	TCONS_00000379	0	+	36689943	36771053	255,0,0	12	163,103,168,903,705,173,112,85,188,199,141,1657,	0,35039,58190,62025,64717,67031,68255,69508,72240,76543,77213,79453,
chr1	36690036	36771053	TCONS_00000381	0	+	36690036	36771053	255,0,0	13	70,52,103,168,903,705,173,112,85,188,199,141,1657,	0,976,34946,58097,61932,64624,66938,68162,69415,72147,76450,77120,79360,
chr1	36690042	36771053	TCONS_00000382	0	+	36690042	36771053	255,0,0	13	64,103,168,903,705,173,112,85,192,188,199,144,1657,	0,34940,58091,61926,64618,66932,68156,69409,69608,72141,76444,77111,79354,
chr1	36724974	36771053	TCONS_00000384	0	+	36724974	36771053	255,0,0	11	111,168,903,705,173,112,85,188,199,144,1657,	0,23159,26994,29686,32000,33224,34477,37209,41512,42179,44422,
chr1	37940031	37950094	TCONS_00000385	0	+	37940031	37950094	255,0,0	6	199,478,140,235,107,1757,	0,1031,5859,7170,8003,8306,
chr1	37940178	37950094	TCONS_00000386	0	+	37940178	37950094	255,0,0	6	52,481,140,235,107,1757,	0,881,5712,7023,7856,8159,
chr1	38158006	38175370	TCONS_00000388	0	+	38158006	38175370	255,0,0	10	450,129,41,73,86,65,96,127,87,1377,	0,570,3575,6570,8101,9419,10917,13106,14643,15987,
chr1	38477198	38490085	TCONS_00000393	0	+	38477198	38490085	255,0,0	9	42,137,62,103,114,94,131,111,869,	0,1202,4832,6141,6937,7532,7726,11172,12018,
chr1	39456932	39472024	TCONS_00000396	0	+	39456932	39472024	255,0,0	5	340,141,135,72,2308,	0,6910,9711,12086,12784,
chr1	39491970	39500479	TCONS_00000397	0	+	39491970	39500479	255,0,0	3	100,218,416,	0,2424,8093,
chr1	39491998	39500479	TCONS_00000398	0	+	39491998	39500479	255,0,0	3	76,218,416,	0,2396,8065,
chr1	39571261	39952983	TCONS_00000402	0	+	39571261	39952983	255,0,0	97	128,62,90,78,93,167,113,107,120,96,128,94,155,277,129,78,162,105,96,126,153,155,127,184,170,179,139,194,163,84,108,99,153,89,136,5451,150,216,150,234,150,234,225,519,177,124,209,318,167,157,118,242,130,200,496,1472,162,171,167,160,327,85,242,207,120,108,219,204,9,232,227,123,102,102,174,156,198,129,174,156,207,120,170,160,195,129,144,189,121,164,163,155,75,118,212,130,1774,	0,125592,144424,148708,152346,176618,177599,177819,178476,178743,179493,179707,180014,181696,186320,187176,187868,189456,190197,192030,194620,197334,203980,204655,205241,209923,210801,211624,212863,214074,217018,217320,218603,219056,221628,225613,231592,234912,235214,241387,243888,245195,247417,251785,253107,253551,255203,255770,262558,264440,266889,273613,274654,276363,279844,281597,316784,31714…
chr1	39673185	39952983	TCONS_00000406	0	+	39673185	39952983	255,0,0	93	96,62,90,78,93,167,113,107,120,96,128,94,155,277,129,78,162,105,96,126,153,155,127,184,170,179,139,194,163,84,108,99,153,89,136,150,234,225,519,177,124,209,318,167,157,118,63,242,130,200,496,1472,162,171,167,160,327,85,242,207,120,108,219,204,9,232,227,123,102,102,174,156,198,129,174,156,207,120,170,160,195,129,144,189,121,164,163,155,75,118,212,130,1774,	0,23668,42500,46784,50422,74694,75675,75895,76552,76819,77569,77783,78090,79772,84396,85252,85944,87532,88273,90106,92696,95410,102056,102731,103317,107999,108877,109700,110939,112150,115094,115396,116679,117132,119704,141964,143271,145493,149861,151183,151627,153279,153846,160634,162516,164965,170947,171689,172730,174439,177920,179673,214860,215216,216514,219941,220447,221728,222313,223188,22502…
chr1	39696640	39952983	TCONS_00000409	0	+	39696640	39952983	255,0,0	93	111,62,90,78,93,167,113,107,120,96,128,94,155,277,129,78,162,105,96,126,153,155,127,184,170,179,139,194,163,84,108,99,153,89,136,150,234,225,519,177,124,209,318,167,157,118,63,242,130,200,496,1472,162,171,167,160,327,85,242,207,120,108,219,204,9,232,227,123,102,102,174,156,198,129,174,156,207,120,170,160,195,129,144,189,121,164,163,155,75,118,212,130,1774,	0,213,19045,23329,26967,51239,52220,52440,53097,53364,54114,54328,54635,56317,60941,61797,62489,64077,64818,66651,69241,71955,78601,79276,79862,84544,85422,86245,87484,88695,91639,91941,93224,93677,96249,118509,119816,122038,126406,127728,128172,129824,130391,137179,139061,141510,147492,148234,149275,150984,154465,156218,191405,191761,193059,196486,196992,198273,198858,199733,201566,202079,203445…
chr1	40420823	40437141	TCONS_00000413	0	+	40420823	40437141	255,0,0	14	234,135,125,124,79,158,91,122,84,84,113,144,177,1965,	0,1935,3549,10059,10319,10705,11449,11659,11934,12476,12652,13182,13417,14353,
chr1	40505895	40539938	TCONS_00000424	0	+	40505895	40539938	255,0,0	13	244,122,104,78,144,86,106,178,185,124,83,144,2817,	0,19113,19843,21511,24003,24250,25991,27316,29466,29935,30206,30612,31226,
chr1	40506355	40539938	TCONS_00000427	0	+	40506355	40539938	255,0,0	13	100,125,101,78,144,86,106,178,185,124,83,144,2817,	0,18650,19386,21051,23543,23790,25531,26856,29006,29475,29746,30152,30766,
chr1	40506355	40539938	TCONS_00000428	0	+	40506355	40539938	255,0,0	13	118,125,101,78,144,86,106,178,185,124,83,144,2817,	0,18650,19386,21051,23543,23790,25531,26856,29006,29475,29746,30152,30766,
chr1	40627033	40706726	TCONS_00000430	0	+	40627033	40706726	255,0,0	8	275,155,82,133,203,137,142,5263,	0,27693,29410,34270,41050,61212,70155,74430,
chr1	40654725	40706726	TCONS_00000431	0	+	40654725	40706726	255,0,0	7	156,82,133,203,137,142,5263,	0,1718,6578,13358,33520,42463,46738,
chr1	40747012	40759854	TCONS_00000432	0	+	40747012	40759854	255,0,0	4	187,105,144,1738,	0,4584,9513,11104,
chr1	40810249	40889106	TCONS_00000433	0	+	40810249	40889106	255,0,0	11	333,137,134,86,79,87,82,110,166,317,1459,	0,17722,62158,64075,65179,68438,69581,70694,71598,72202,77398,
chr1	40810370	40889106	TCONS_00000435	0	+	40810370	40889106	255,0,0	12	212,137,63,134,86,79,87,82,110,166,317,1459,	0,17601,58985,62037,63954,65058,68317,69460,70573,71477,72081,77277,
chr1	40810436	40889106	TCONS_00000436	0	+	40810436	40889106	255,0,0	11	146,63,134,86,79,87,82,110,166,317,1459,	0,58919,61971,63888,64992,68251,69394,70507,71411,72015,77211,
chr1	40839369	40889106	TCONS_00000437	0	+	40839369	40889106	255,0,0	10	526,134,86,79,87,82,110,166,317,1459,	0,33038,34955,36059,39318,40461,41574,42478,43082,48278,
chr1	40943024	40962154	TCONS_00000438	0	+	40943024	40962154	255,0,0	6	542,453,92,127,96,1562,	0,1683,4410,11735,12176,17568,
chr1	40943030	40962154	TCONS_00000439	0	+	40943030	40962154	255,0,0	6	536,473,92,127,96,1562,	0,1657,4404,11729,12170,17562,
chr1	41156023	41237271	TCONS_00000440	0	+	41156023	41237271	255,0,0	10	1516,113,72,114,96,174,159,108,60,891,	0,48484,57182,59221,62799,67769,72536,76244,79004,80357,
chr1	41157224	41237271	TCONS_00000441	0	+	41157224	41237271	255,0,0	10	315,113,72,114,96,174,159,108,60,1203,	0,47283,55981,58020,61598,66568,71335,75043,77803,78844,
chr1	41445424	41478806	TCONS_00000442	0	+	41445424	41478806	255,0,0	19	77,179,171,101,117,84,81,152,133,89,95,63,44,97,56,97,145,94,1477,	0,3525,5068,7619,8841,11412,12012,16164,17641,21276,22407,23361,26298,27696,28906,29041,29692,30408,31905,
chr1	42921911	42926355	TCONS_00000443	0	+	42921911	42926355	255,0,0	3	388,104,1082,	0,1006,3362,
chr1	42922227	42926355	TCONS_00000444	0	+	42922227	42926355	255,0,0	3	517,104,1082,	0,690,3046,
chr1	43124060	43142573	TCONS_00000445	0	+	43124060	43142573	255,0,0	10	123,65,24,45,43,93,88,41,90,319,	0,454,838,1132,2472,6473,7590,8157,8961,18194,
chr1	43124082	43144428	TCONS_00000446	0	+	43124082	43144428	255,0,0	11	101,65,24,45,43,93,88,41,90,172,32,	0,432,816,1110,2450,6451,7568,8135,8939,18172,20314,
chr1	43824392	43828860	TCONS_00000451	0	+	43824392	43828860	255,0,0	11	285,230,149,97,129,197,95,229,126,118,239,	0,445,768,1003,1247,1471,1777,2011,2398,3473,4229,
chr1	43824614	43828860	TCONS_00000452	0	+	43824614	43828860	255,0,0	10	453,149,97,129,197,95,229,126,118,239,	0,546,781,1025,1249,1555,1789,2176,3251,4007,
chr1	44115821	44171471	TCONS_00000453	0	+	44115821	44171471	255,0,0	22	102,177,176,115,194,50,104,138,248,200,371,121,182,205,77,56,109,186,171,120,93,1571,	0,2986,5440,10147,12743,15545,16301,16803,17621,18949,21354,33533,38763,40694,41345,42105,43843,44558,47692,53466,53869,54079,
chr1	44116185	44171471	TCONS_00000454	0	+	44116185	44171471	255,0,0	22	35,177,176,115,194,50,104,138,248,200,371,121,182,205,77,56,109,186,171,120,93,1571,	0,2622,5076,9783,12379,15181,15937,16439,17257,18585,20990,33169,38399,40330,40981,41741,43479,44194,47328,53102,53505,53715,
chr1	44116236	44171471	TCONS_00000455	0	+	44116236	44171471	255,0,0	22	109,177,176,115,194,50,104,138,248,200,371,121,182,205,77,56,109,186,171,120,93,1571,	0,2571,5025,9732,12328,15130,15886,16388,17206,18534,20939,33118,38348,40279,40930,41690,43428,44143,47277,53051,53454,53664,
chr1	44412600	44433803	TCONS_00000457	0	+	44412600	44433803	255,0,0	20	756,737,141,142,167,121,148,182,27,135,144,81,138,97,53,67,59,90,182,546,	0,2488,9391,9631,9881,10266,10473,11048,11313,11532,11817,13320,13947,14237,17340,19646,19795,20001,20386,20657,
chr1	44435615	44439044	TCONS_00000458	0	+	44435615	44439044	255,0,0	6	379,113,224,684,177,958,	0,652,1022,1443,2214,2471,
chr1	44440577	44444081	TCONS_00000459	0	+	44440577	44444081	255,0,0	8	202,49,84,78,70,52,191,429,	0,894,1184,1396,1684,1867,2120,3075,
chr1	45097616	45117507	TCONS_00000463	0	+	45097616	45117507	255,0,0	11	264,43,44,133,97,87,56,79,109,75,1132,	0,398,3600,4085,12753,13050,13276,13465,17716,17938,18759,
chr1	45097642	45117507	TCONS_00000464	0	+	45097642	45117507	255,0,0	11	242,43,44,133,97,87,56,79,109,75,1132,	0,372,3574,4059,12727,13024,13250,13439,17690,17912,18733,
chr1	45097779	45117507	TCONS_00000466	0	+	45097779	45117507	255,0,0	11	101,43,122,133,97,87,56,79,109,75,1132,	0,235,3437,3922,12590,12887,13113,13302,17553,17775,18596,
chr1	45097965	45117507	TCONS_00000467	0	+	45097965	45117507	255,0,0	10	92,122,133,97,87,56,79,109,75,1132,	0,3251,3736,12404,12701,12927,13116,17367,17589,18410,
chr1	45205472	45233467	TCONS_00000468	0	+	45205472	45233467	255,0,0	21	202,95,102,49,123,123,101,96,55,163,91,64,92,143,205,111,68,106,114,124,699,	0,1112,7583,7851,10641,13331,13932,14949,16128,16274,17755,18107,18248,19405,20479,20791,22115,22545,22744,27025,27296,
chr1	45241144	45244413	TCONS_00000469	0	+	45241144	45244413	255,0,0	6	128,107,100,176,130,166,	0,561,1202,2141,2527,3103,
chr1	45265750	45271777	TCONS_00000471	0	+	45265750	45271777	255,0,0	16	29,298,108,117,130,88,96,199,124,92,94,84,163,130,114,619,	0,297,761,957,1543,1766,2681,2876,3189,3521,3852,4084,4260,4571,5187,5408,
chr1	45477667	45481250	TCONS_00000472	0	+	45477667	45481250	255,0,0	10	290,113,80,63,198,162,138,101,67,242,	0,911,1140,1296,1598,1913,2443,2740,2944,3341,
chr1	45477769	45481250	TCONS_00000473	0	+	45477769	45481250	255,0,0	10	188,163,80,63,198,162,138,101,67,242,	0,759,1038,1194,1496,1811,2341,2638,2842,3239,
chr1	45805356	45812654	TCONS_00000474	0	+	45805356	45812654	255,0,0	8	620,143,41,97,159,260,268,3901,	0,1388,1618,1788,2264,2699,3050,3397,
chr1	45805405	45812654	TCONS_00000475	0	+	45805405	45812654	255,0,0	8	571,143,41,97,159,260,160,3901,	0,1339,1569,1739,2215,2650,3109,3348,
chr1	46016470	46035821	TCONS_00000480	0	+	46016470	46035821	255,0,0	10	78,190,90,120,152,196,200,73,87,259,	0,167,10990,15770,16070,17183,17686,18128,18344,19092,
chr1	46016484	46035821	TCONS_00000482	0	+	46016484	46035821	255,0,0	10	68,190,90,120,152,196,200,73,87,259,	0,153,10976,15756,16056,17169,17672,18114,18330,19078,
chr1	46016488	46035821	TCONS_00000483	0	+	46016488	46035821	255,0,0	11	60,190,128,90,120,152,196,200,73,87,259,	0,149,1619,10972,15752,16052,17165,17668,18110,18326,19074,
chr1	46049724	46084648	TCONS_00000485	0	+	46049724	46084648	255,0,0	14	153,48,111,81,110,80,86,74,189,167,57,78,129,916,	0,7170,18202,20883,22429,29116,30043,30240,30960,31252,32284,32573,33410,34008,
chr1	46049725	46084648	TCONS_00000486	0	+	46049725	46084648	255,0,0	15	152,48,73,111,81,110,80,86,74,189,167,57,78,129,916,	0,7169,16331,18201,20882,22428,29115,30042,30239,30959,31251,32283,32572,33409,34007,
chr1	46151662	46160107	TCONS_00000490	0	+	46151662	46160107	255,0,0	4	134,125,137,1232,	0,2160,4983,7213,
chr1	46769341	46782555	TCONS_00000501	0	+	46769341	46782555	255,0,0	4	151,27,162,332,	0,5431,6485,12882,
chr1	46806009	46832010	TCONS_00000505	0	+	46806009	46832010	255,0,0	6	582,344,155,161,125,4769,	0,4463,6583,12530,20366,21232,
chr1	47799554	47844616	TCONS_00000506	0	+	47799554	47844616	255,0,0	6	234,147,153,77,97,2241,	0,34586,39072,41026,41314,42821,
chr1	51434360	51441312	TCONS_00000507	0	+	51434360	51441312	255,0,0	3	1211,140,1748,	0,1669,5204,
chr1	52082710	52255087	TCONS_00000508	0	+	52082710	52255087	255,0,0	24	183,51,79,77,96,48,30,51,39,91,105,160,113,119,86,172,85,111,64,141,79,92,136,1701,	0,34952,52395,96964,128497,129671,131330,133106,139281,143651,144828,148783,155031,155566,159794,164125,165520,166876,167225,167403,168769,169487,170314,170676,
chr1	52195399	52255087	TCONS_00000510	0	+	52195399	52255087	255,0,0	21	397,96,48,30,51,39,91,105,160,113,119,86,172,85,111,64,141,79,92,136,1701,	0,15808,16982,18641,20417,26592,30962,32139,36094,42342,42877,47105,51436,52831,54187,54536,54714,56080,56798,57625,57987,
chr1	52195507	52255087	TCONS_00000511	0	+	52195507	52255087	255,0,0	20	289,96,48,30,51,91,105,160,113,119,86,172,85,111,64,141,79,92,136,1701,	0,15700,16874,18533,20309,30854,32031,35986,42234,42769,46997,51328,52723,54079,54428,54606,55972,56690,57517,57879,
chr1	52195524	52255087	TCONS_00000512	0	+	52195524	52255087	255,0,0	21	149,96,48,30,51,39,91,105,160,113,119,86,172,85,111,64,141,79,92,136,1701,	0,15683,16857,18516,20292,26467,30837,32014,35969,42217,42752,46980,51311,52706,54062,54411,54589,55955,56673,57500,57862,
chr1	52520939	52555705	TCONS_00000514	0	+	52520939	52555705	255,0,0	7	48,150,67,114,202,60,3322,	0,962,4567,9557,28072,30844,31444,
chr1	52870255	52886729	TCONS_00000515	0	+	52870255	52886729	255,0,0	10	296,160,122,86,111,113,27,98,49,4410,	0,1096,3985,6531,7930,9295,10037,10178,10754,12064,
chr1	53392960	53517348	TCONS_00000519	0	+	53392960	53517348	255,0,0	16	177,58,72,132,65,127,64,87,151,148,108,154,103,130,80,1068,	0,14507,20720,23466,27451,34214,47480,49394,50928,53107,60740,87601,100680,111628,120569,123320,
chr1	53477339	53517348	TCONS_00000520	0	+	53477339	53517348	255,0,0	6	38,154,103,130,80,1068,	0,3222,16301,27249,36190,38941,
chr1	53662267	53680409	TCONS_00000521	0	+	53662267	53680409	255,0,0	5	500,81,107,1305,1474,	0,4123,5727,13419,16668,
chr1	53666385	53680409	TCONS_00000522	0	+	53666385	53680409	255,0,0	4	86,107,1305,1474,	0,1609,9301,12550,
chr1	54412018	54434001	TCONS_00000523	0	+	54412018	54434001	255,0,0	9	204,34,487,132,119,89,114,85,664,	0,1442,5640,11803,14010,15688,15950,19950,21319,
chr1	54412044	54434001	TCONS_00000524	0	+	54412044	54434001	255,0,0	8	178,487,132,119,89,114,85,664,	0,5614,11777,13984,15662,15924,19924,21293,
chr1	54417654	54434001	TCONS_00000525	0	+	54417654	54434001	255,0,0	7	491,132,119,89,114,85,664,	0,6167,8374,10052,10314,14314,15683,
chr1	54665859	54684365	TCONS_00000527	0	+	54665859	54684365	255,0,0	7	403,184,116,186,158,204,521,	0,4831,5108,9759,12314,15954,17985,
chr1	59486061	59498914	TCONS_00000530	0	+	59486061	59498914	255,0,0	3	234,90,382,	0,1098,12471,
chr1	59486061	59501200	TCONS_00000531	0	+	59486061	59501200	255,0,0	4	234,90,252,1641,	0,1098,12471,13498,
chr1	59486083	59488891	TCONS_00000532	0	+	59486083	59488891	255,0,0	3	212,90,236,	0,1076,2572,
chr1	59486121	59511437	TCONS_00000533	0	+	59486121	59511437	255,0,0	4	174,90,59,1272,	0,1038,21722,24044,
chr1	59762675	60228379	TCONS_00000534	0	+	59762675	60228379	255,0,0	16	147,215,112,152,89,116,129,104,108,62,148,75,121,95,62,205,	0,24532,42954,49243,81745,159957,215307,257120,310799,328984,341224,363215,370279,377035,460927,465499,
chr1	62901737	62917831	TCONS_00000535	0	+	62901737	62917831	255,0,0	9	1334,239,121,105,161,692,171,202,1915,	0,3732,5421,6128,7092,8671,11274,12398,14179,
chr1	62901994	62917831	TCONS_00000536	0	+	62901994	62917831	255,0,0	9	239,239,121,105,161,692,171,202,1915,	0,3475,5164,5871,6835,8414,11017,12141,13922,
chr1	63249791	63331338	TCONS_00000537	0	+	63249791	63331338	255,0,0	11	153,144,84,234,331,71,137,79,77,120,1676,	0,19598,21051,32454,34884,37018,44919,49917,50655,57307,79871,
chr1	63249799	63331338	TCONS_00000538	0	+	63249799	63331338	255,0,0	11	97,144,84,234,331,71,137,79,77,120,1676,	0,19590,21043,32446,34876,37010,44911,49909,50647,57299,79863,
chr1	64058727	64125901	TCONS_00000539	0	+	64058727	64125901	255,0,0	11	678,163,147,126,191,155,116,136,184,135,645,	0,36368,36885,38600,41772,43177,45628,55460,58612,61275,66529,
chr1	65613219	65697825	TCONS_00000541	0	+	65613219	65697825	255,0,0	6	129,275,120,173,119,6080,	0,741,43173,71217,77215,78526,
chr1	65613525	65697825	TCONS_00000542	0	+	65613525	65697825	255,0,0	5	710,120,173,119,6080,	0,42867,70911,76909,78220,
chr1	65614505	65697825	TCONS_00000543	0	+	65614505	65697825	255,0,0	5	318,120,173,119,6080,	0,41887,69931,75929,77240,
chr1	65631597	65697825	TCONS_00000544	0	+	65631597	65697825	255,0,0	5	105,120,173,119,6080,	0,24795,52839,58837,60148,
chr1	65720163	65881131	TCONS_00000545	0	+	65720163	65881131	255,0,0	19	169,151,50,149,123,134,195,118,80,194,81,435,135,69,120,264,143,177,2525,	0,110154,111404,111567,124921,129712,131231,132331,133855,134775,135066,137950,140417,144332,147280,151389,154160,156769,158443,
chr1	65720200	65881131	TCONS_00000546	0	+	65720200	65881131	255,0,0	20	132,151,50,149,123,55,134,195,118,80,194,81,435,135,69,120,264,143,177,2525,	0,110117,111367,111530,124884,127303,129675,131194,132294,133818,134738,135029,137913,140380,144295,147243,151352,154123,156732,158406,
chr1	65811322	65881131	TCONS_00000547	0	+	65811322	65881131	255,0,0	19	84,151,50,149,123,134,195,118,80,194,81,435,135,69,120,264,143,177,2525,	0,18995,20245,20408,33762,38553,40072,41172,42696,43616,43907,46791,49258,53173,56121,60230,63001,65610,67284,
chr1	65830315	65881131	TCONS_00000548	0	+	65830315	65881131	255,0,0	18	153,50,149,123,134,195,118,80,194,81,435,135,69,120,264,143,177,2525,	0,1252,1415,14769,19560,21079,22179,23703,24623,24914,27798,30265,34180,37128,41237,44008,46617,48291,
chr1	65886307	65901683	TCONS_00000549	0	+	65886307	65901683	255,0,0	4	116,76,187,4198,	0,4678,9237,11178,
chr1	66797645	66840255	TCONS_00000554	0	+	66797645	66840255	255,0,0	10	658,94,179,99,165,100,155,123,183,2260,	0,23564,29652,31205,31444,33704,35733,35980,36824,40350,
chr1	66829086	66840255	TCONS_00000555	0	+	66829086	66840255	255,0,0	6	168,100,155,123,183,2260,	0,2263,4292,4539,5383,8909,
chr1	67390663	67454397	TCONS_00000558	0	+	67390663	67454397	255,0,0	15	115,101,77,25,146,162,133,65,73,152,82,95,128,140,4143,	0,1161,3906,15047,21169,33078,33870,34698,38107,45827,46674,47916,51614,56798,59591,
chr1	67391772	67454397	TCONS_00000560	0	+	67391772	67454397	255,0,0	13	153,25,146,162,133,65,73,152,82,95,128,140,4143,	0,13938,20060,31969,32761,33589,36998,44718,45565,46807,50505,55689,58482,
chr1	67395968	67454397	TCONS_00000561	0	+	67395968	67454397	255,0,0	13	115,25,146,162,133,65,73,152,82,95,128,140,4143,	0,9742,15864,27773,28565,29393,32802,40522,41369,42611,46309,51493,54286,
chr1	68150521	68154017	TCONS_00000562	0	+	68150521	68154017	255,0,0	4	700,102,238,674,	0,1186,1511,2822,
chr1	70671356	70718839	TCONS_00000564	0	+	70671356	70718839	255,0,0	13	107,225,134,110,93,50,128,82,132,90,96,139,2546,	0,15941,22748,26594,29022,29827,31751,33765,39010,41144,44278,44691,44937,
chr1	70671357	70718839	TCONS_00000565	0	+	70671357	70718839	255,0,0	13	106,228,134,110,93,50,128,82,132,90,96,139,2549,	0,15937,22747,26593,29021,29826,31750,33764,39009,41143,44277,44690,44933,
chr1	70687077	70718839	TCONS_00000568	0	+	70687077	70718839	255,0,0	12	445,3554,110,93,50,128,82,132,90,96,139,2549,	0,7027,10873,13301,14106,16030,18044,23289,25423,28557,28970,29213,
chr1	70687077	70718839	TCONS_00000569	0	+	70687077	70718839	255,0,0	13	445,134,117,110,93,50,128,82,132,90,96,139,2546,	0,7027,10464,10873,13301,14106,16030,18044,23289,25423,28557,28970,29216,
chr1	70820492	70833701	TCONS_00000571	0	+	70820492	70833701	255,0,0	4	302,94,52,402,	0,11634,12123,12807,
chr1	76190393	76229446	TCONS_00000574	0	+	76190393	76229446	255,0,0	12	109,88,98,70,101,81,131,109,141,96,249,1070,	0,3692,7935,8144,8819,10082,15271,21097,24710,25742,36413,37983,
chr1	76251900	76260858	TCONS_00000576	0	+	76251900	76260858	255,0,0	9	59,108,198,106,53,111,126,150,664,	0,1281,2943,3736,5069,5245,5965,7868,8294,
chr1	76251911	76260858	TCONS_00000579	0	+	76251911	76260858	255,0,0	11	48,108,198,106,123,72,53,111,126,150,664,	0,1270,2932,3725,3925,4219,5058,5234,5954,7857,8283,
chr1	78353727	78414438	TCONS_00000584	0	+	78353727	78414438	255,0,0	11	717,79,79,149,198,177,189,198,222,186,6293,	0,28012,29917,30082,38371,38673,41273,45239,47780,53980,54418,
chr1	78353748	78414438	TCONS_00000585	0	+	78353748	78414438	255,0,0	12	696,79,79,149,42,198,177,189,198,222,186,6293,	0,27991,29896,30061,37124,38350,38652,41252,45218,47759,53959,54397,
chr1	78390808	78414438	TCONS_00000586	0	+	78390808	78414438	255,0,0	8	106,198,177,189,198,222,186,6293,	0,1290,1592,4192,8158,10699,16899,17337,
chr1	78470612	78486737	TCONS_00000590	0	+	78470612	78486737	255,0,0	3	393,569,5040,	0,8122,11085,
chr1	79085727	79130003	TCONS_00000592	0	+	79085727	79130003	255,0,0	18	16,115,49,196,153,172,101,175,345,57,467,37,196,150,172,101,175,554,	0,414,8908,9677,15294,16989,20978,21392,21732,29806,30143,34200,34971,35319,39269,40511,42661,43722,
chr1	79086095	79130003	TCONS_00000600	0	+	79086095	79130003	255,0,0	18	161,488,49,196,153,172,101,175,345,57,467,37,196,150,172,101,175,554,	0,7495,8540,9309,14926,16621,20610,21024,21364,29438,29775,33832,34603,34951,38901,40143,42293,43354,
chr1	79086097	79130003	TCONS_00000601	0	+	79086097	79130003	255,0,0	17	159,488,49,196,153,172,101,175,57,467,37,196,150,172,101,175,554,	0,7493,8538,9307,14924,16619,20608,21022,29436,29773,33830,34601,34949,38899,40141,42291,43352,
chr1	79086097	79130003	TCONS_00000602	0	+	79086097	79130003	255,0,0	15	159,49,153,172,101,175,57,467,37,196,150,172,101,175,554,	0,8538,14924,16619,20608,21022,29436,29773,33830,34601,34949,38899,40141,42291,43352,
chr1	79086099	79130003	TCONS_00000604	0	+	79086099	79130003	255,0,0	17	157,49,196,153,172,101,175,1527,57,467,37,196,150,172,101,175,554,	0,8536,9305,14922,16617,20606,21020,21360,29434,29771,33828,34599,34947,38897,40139,42289,43350,
chr1	79086123	79130003	TCONS_00000618	0	+	79086123	79130003	255,0,0	16	133,49,196,153,172,101,175,57,467,37,196,150,172,101,175,554,	0,8512,9281,14898,16593,20582,20996,29410,29747,33804,34575,34923,38873,40115,42265,43326,
chr1	79115490	79130003	TCONS_00000625	0	+	79115490	79130003	255,0,0	9	100,112,37,196,150,172,903,175,554,	0,735,4437,5208,5556,9506,10748,12898,13959,
chr1	84609965	84704442	TCONS_00000626	0	+	84609965	84704442	255,0,0	10	266,62,129,99,83,127,96,123,165,3580,	0,34894,37917,39754,40817,52333,53446,58400,69870,90897,
chr1	84944945	84964283	TCONS_00000627	0	+	84944945	84964283	255,0,0	9	247,57,81,96,154,83,182,127,1172,	0,1693,3652,10370,11056,16110,16619,16981,18166,
chr1	86046457	86049612	TCONS_00000628	0	+	86046457	86049612	255,0,0	5	273,214,357,209,1190,	0,590,1153,1641,1965,
chr1	87170240	87213877	TCONS_00000629	0	+	87170240	87213877	255,0,0	9	414,175,129,134,93,90,101,229,5067,	0,11133,14949,17982,19755,30044,30521,37650,38570,
chr1	87380389	87575821	TCONS_00000630	0	+	87380389	87575821	255,0,0	7	454,239,86,139,98,158,5669,	0,158227,169487,177824,183131,188725,189763,
chr1	87794514	87813219	TCONS_00000631	0	+	87794514	87813219	255,0,0	5	413,239,97,156,2749,	0,3181,10704,11215,15956,
chr1	87796153	87813219	TCONS_00000633	0	+	87796153	87813219	255,0,0	6	226,90,239,97,156,2749,	0,1254,1542,9065,9576,14317,
chr1	89149601	89301727	TCONS_00000635	0	+	89149601	89301727	255,0,0	22	710,301,155,118,146,217,186,110,144,76,175,127,131,76,92,177,63,77,143,108,81,2800,	0,57069,76303,86433,87502,87744,100720,102185,120472,120927,121578,121972,123394,123610,123765,129638,138022,140391,144562,148825,149158,149326,
chr1	89873092	89893806	TCONS_00000638	0	+	89873092	89893806	255,0,0	7	225,209,128,2043,232,217,2118,	0,2766,12657,13547,16255,16724,18596,
chr1	89873100	89889745	TCONS_00000639	0	+	89873100	89889745	255,0,0	5	217,209,128,2043,269,	0,2758,12649,13539,16376,
chr1	89873122	89889745	TCONS_00000640	0	+	89873122	89889745	255,0,0	6	195,209,128,1204,213,269,	0,2736,12627,13517,15347,16354,
chr1	89873127	89893806	TCONS_00000642	0	+	89873127	89893806	255,0,0	7	190,209,128,2396,103,194,2118,	0,2731,12622,13512,16349,16689,18561,
chr1	89873194	89893806	TCONS_00000648	0	+	89873194	89893806	255,0,0	9	123,209,128,110,84,213,103,194,2118,	0,2664,12555,13445,15066,15275,16282,16622,18494,
chr1	89873194	89893806	TCONS_00000649	0	+	89873194	89893806	255,0,0	9	123,209,128,140,285,213,103,217,2118,	0,2664,12555,13445,14364,15275,16282,16622,18494,
chr1	90098691	90185289	TCONS_00000655	0	+	90098691	90185289	255,0,0	3	190,142,7022,	0,53337,79576,
chr1	90286662	90419353	TCONS_00000658	0	+	90286662	90419353	255,0,0	4	188,145,3183,23,	0,22534,111963,132668,
chr1	90309077	90401986	TCONS_00000663	0	+	90309077	90401986	255,0,0	2	264,3361,	0,89548,
chr1	93297479	93303191	TCONS_00000666	0	+	93297479	93303191	255,0,0	6	195,70,116,135,203,179,	0,1466,1622,2856,4267,5533,
chr1	93297570	93309889	TCONS_00000667	0	+	93297570	93309889	255,0,0	8	104,70,116,135,203,178,89,2567,	0,1375,1531,2765,4176,5442,8537,9752,
chr1	93544794	93605029	TCONS_00000670	0	+	93544794	93605029	255,0,0	15	294,199,82,96,101,149,96,69,124,68,171,106,53,105,2803,	0,30992,31307,35450,35750,36232,39107,40095,41311,47994,50040,54465,54690,54853,57432,
chr1	93811462	93833277	TCONS_00000671	0	+	93811462	93833277	255,0,0	3	960,164,7228,	0,8002,14587,
chr1	93913644	94020332	TCONS_00000672	0	+	93913644	94020332	255,0,0	14	218,116,54,148,63,105,129,147,204,110,133,95,149,3829,	0,51380,73994,75256,76173,81564,82667,84834,86617,96019,98754,99259,101190,102859,
chr1	99127203	99226050	TCONS_00000676	0	+	99127203	99226050	255,0,0	9	264,183,111,165,199,200,87,153,441,	0,23237,29427,29887,33870,37058,40169,76589,98406,
chr1	100502212	100548935	TCONS_00000680	0	+	100502212	100548935	255,0,0	13	1293,214,96,63,128,115,219,114,72,113,98,164,1377,	0,1446,13252,22009,23221,25178,31320,31816,32957,40508,41794,43839,45346,
chr1	13423735	13425820	TCONS_00000680_add	0	+	13423735	13425820	255,0,0	2	560,854,	0,1231,
chr1	100512651	100548935	TCONS_00000682	0	+	100512651	100548935	255,0,0	12	126,96,63,128,115,219,114,72,113,98,164,1377,	0,2813,11570,12782,14739,20881,21377,22518,30069,31355,33400,34907,
chr1	13644543	13648991	TCONS_00000682_add	0	+	13644543	13648991	255,0,0	3	549,582,897,	0,1220,3551,
chr1	13644574	13716822	TCONS_00000683_add	0	+	13644574	13716822	255,0,0	2	518,22,	0,72226,
chr1	100542493	100548935	TCONS_00000684	0	+	100542493	100548935	255,0,0	4	340,98,164,1377,	0,1513,3558,5065,
chr1	100731738	100758736	TCONS_00000685	0	+	100731738	100758736	255,0,0	11	238,101,144,124,59,142,125,59,95,105,1778,	0,341,1969,4374,7211,8641,9416,11075,19045,20916,25220,
chr1	101185299	101204902	TCONS_00000687	0	+	101185299	101204902	255,0,0	9	181,276,321,267,276,321,267,267,1224,	0,732,3276,4880,9363,11454,12674,14758,18379,
chr1	101361169	101447311	TCONS_00000688	0	+	101361169	101447311	255,0,0	13	200,202,102,114,88,127,144,51,136,91,150,93,6537,	0,527,956,11238,15449,16498,18049,22463,26092,66214,70155,79196,79605,
chr1	101361565	101447311	TCONS_00000689	0	+	101361565	101447311	255,0,0	12	333,102,114,88,127,144,51,136,91,150,93,6537,	0,560,10842,15053,16102,17653,22067,25696,65818,69759,78800,79209,
chr1	101361588	101447311	TCONS_00000690	0	+	101361588	101447311	255,0,0	11	310,102,114,88,127,144,51,136,91,150,6946,	0,537,10819,15030,16079,17630,22044,25673,65795,69736,78777,
chr1	101701821	101707862	TCONS_00000691	0	+	101701821	101707862	255,0,0	3	834,2951,279,	0,2556,5762,
chr1	101702330	101707153	TCONS_00000692	0	+	101702330	101707153	255,0,0	2	217,2776,	0,2047,
chr1	109102946	109182099	TCONS_00000694	0	+	109102946	109182099	255,0,0	11	241,121,30,117,47,104,96,190,128,70,4370,	0,40241,45898,51853,56057,64320,67842,68070,68352,69263,74783,
chr1	109143184	109182099	TCONS_00000695	0	+	109143184	109182099	255,0,0	10	124,30,117,47,104,96,190,128,70,4370,	0,5660,11615,15819,24082,27604,27832,28114,29025,34545,
chr1	109234821	109245551	TCONS_00000696	0	+	109234821	109245551	255,0,0	6	668,69,152,61,224,3768,	0,3502,3843,4077,6404,6962,
chr1	110162363	110174670	TCONS_00000698	0	+	110162363	110174670	255,0,0	18	537,131,131,69,109,187,142,90,130,195,132,164,127,164,121,174,111,1106,	0,5561,5920,6418,6577,6984,7433,7687,8032,8341,8622,8901,9367,9585,10054,10491,10941,11201,
chr1	110162460	110174670	TCONS_00000699	0	+	110162460	110174670	255,0,0	18	1428,131,131,69,109,187,142,90,130,195,132,164,127,164,121,174,111,1106,	0,5464,5823,6321,6480,6887,7336,7590,7935,8244,8525,8804,9270,9488,9957,10394,10844,11104,
chr1	110198697	110208640	TCONS_00000700	0	+	110198697	110208640	255,0,0	8	350,76,65,82,101,96,111,1008,	0,636,1139,1514,1696,2738,2924,8935,
chr1	110198715	110204500	TCONS_00000702	0	+	110198715	110204500	255,0,0	8	332,76,65,82,101,96,111,714,	0,618,1121,1496,1678,2720,2906,5071,
chr1	110210451	110217909	TCONS_00000703	0	+	110210451	110217909	255,0,0	8	322,76,65,82,101,96,111,541,	0,595,1095,1460,1641,3457,3643,6917,
chr1	110212834	110217909	TCONS_00000704	0	+	110212834	110217909	255,0,0	4	22,96,111,541,	0,1074,1260,4534,
chr1	110229976	110236363	TCONS_00000705	0	+	110229976	110236363	255,0,0	9	33,68,76,65,82,101,96,111,536,	0,487,815,1318,1693,1870,2916,3099,5851,
chr1	110448312	110473617	TCONS_00000707	0	+	110448312	110473617	255,0,0	9	106,123,63,171,148,1025,53,56,2144,	0,8568,9943,11602,16156,17475,19085,19456,23161,
chr1	110453112	110473617	TCONS_00000708	0	+	110453112	110473617	255,0,0	10	45,250,123,63,171,148,1025,53,56,2144,	0,322,3768,5143,6802,11356,12675,14285,14656,18361,
chr1	110456659	110473617	TCONS_00000711	0	+	110456659	110473617	255,0,0	9	101,123,63,171,148,1025,53,56,2144,	0,221,1596,3255,7809,9128,10738,11109,14814,
chr1	110577225	110600933	TCONS_00000713	0	+	110577225	110600933	255,0,0	22	214,70,75,135,121,69,107,128,183,218,66,64,72,75,98,127,101,67,105,205,1138,1104,	0,3287,4079,4568,4791,6031,6932,7130,8484,9035,10236,10411,12076,12938,13168,14508,14856,15739,16352,17079,19061,22604,
chr1	110577261	110615113	TCONS_00000716	0	+	110577261	110615113	255,0,0	22	178,70,75,135,121,69,107,128,183,218,66,64,72,75,98,127,101,67,105,205,1138,37,	0,3251,4043,4532,4755,5995,6896,7094,8448,8999,10200,10375,12040,12902,13132,14472,14820,15703,16316,17043,19025,37815,
chr1	111413839	111442556	TCONS_00000718	0	+	111413839	111442556	255,0,0	9	42,93,80,189,75,96,81,84,811,	0,1938,20174,21127,23109,23742,25435,26591,27906,
chr1	111415721	111442556	TCONS_00000719	0	+	111415721	111442556	255,0,0	8	149,80,189,75,96,81,84,811,	0,18292,19245,21227,21860,23553,24709,26024,
chr1	111681660	111730302	TCONS_00000720	0	+	111681660	111730302	255,0,0	9	723,412,148,142,85,132,159,126,3490,	0,8603,20341,22116,35840,43148,43760,44423,45152,
chr1	111682460	111730302	TCONS_00000721	0	+	111682460	111730302	255,0,0	9	469,412,148,142,85,132,159,126,3490,	0,7803,19541,21316,35040,42348,42960,43623,44352,
chr1	111772327	111786057	TCONS_00000722	0	+	111772327	111786057	255,0,0	10	176,202,57,151,125,130,183,117,140,219,	0,1036,1532,5201,5933,6318,9044,11621,12521,13511,
chr1	111992032	112005751	TCONS_00000723	0	+	111992032	112005751	255,0,0	7	171,37,146,164,126,180,2213,	0,426,4800,6675,7219,10046,11506,
chr1	112016388	112021220	TCONS_00000725	0	+	112016388	112021220	255,0,0	6	264,48,70,95,50,616,	0,2251,3031,3567,3959,4216,
chr1	112016423	112021220	TCONS_00000729	0	+	112016423	112021220	255,0,0	6	229,48,70,95,125,616,	0,2216,2996,3532,3849,4181,
chr1	112162790	112259304	TCONS_00000737	0	+	112162790	112259304	255,0,0	9	179,94,84,69,57,141,144,116,4252,	0,7301,71165,75172,77272,83167,84174,88980,92262,
chr1	112170090	112259304	TCONS_00000739	0	+	112170090	112259304	255,0,0	8	91,84,69,57,141,144,116,4252,	0,63865,67872,69972,75867,76874,81680,84962,
chr1	112933889	113004696	TCONS_00000744	0	+	112933889	113004696	255,0,0	7	350,210,124,108,231,108,6144,	0,4795,20926,24889,57674,63181,64663,
chr1	112939086	113004696	TCONS_00000745	0	+	112939086	113004696	255,0,0	6	121,124,108,231,108,6144,	0,15729,19692,52477,57984,59466,
chr1	112954813	113004696	TCONS_00000746	0	+	112954813	113004696	255,0,0	5	126,108,231,108,6144,	0,3965,36750,42257,43739,
chr1	113161386	113214237	TCONS_00000747	0	+	113161386	113214237	255,0,0	10	1119,64,52,64,207,80,79,72,63,1624,	0,28445,30653,34833,35700,40257,40936,48309,50778,51227,
chr1	113217063	113245551	TCONS_00000750	0	+	113217063	113245551	255,0,0	22	288,202,141,811,236,259,135,169,155,177,148,159,104,98,217,118,192,75,126,89,122,2514,	0,406,12524,13886,14973,15398,17223,18319,19576,20011,20307,20974,21706,21995,22188,23552,23845,24273,25243,25452,25777,25974,
chr1	113217066	113245551	TCONS_00000751	0	+	113217066	113245551	255,0,0	21	285,218,204,236,259,135,169,155,177,148,159,104,98,217,118,192,75,126,89,122,2514,	0,387,14490,14970,15395,17220,18316,19573,20008,20304,20971,21703,21992,22185,23549,23842,24270,25240,25449,25774,25971,
chr1	113217071	113245551	TCONS_00000760	0	+	113217071	113245551	255,0,0	19	280,218,204,236,259,135,169,155,177,148,159,104,98,217,118,1524,89,122,2514,	0,382,14485,14965,15390,17215,18311,19568,20003,20299,20966,21698,21987,22180,23544,23837,25444,25769,25966,
chr1	113217085	113245551	TCONS_00000762	0	+	113217085	113245551	255,0,0	21	266,202,204,236,259,135,169,155,177,148,159,104,98,217,118,192,75,126,89,122,2514,	0,384,14471,14951,15376,17201,18297,19554,19989,20285,20952,21684,21973,22166,23530,23823,24251,25221,25430,25755,25952,
chr1	114447271	114456703	TCONS_00000764	0	+	114447271	114456703	255,0,0	4	1126,166,183,2951,	0,2346,3359,6481,
chr1	114447744	114456703	TCONS_00000765	0	+	114447744	114456703	255,0,0	3	653,183,2951,	0,2886,6008,
chr1	114472249	114520432	TCONS_00000766	0	+	114472249	114520432	255,0,0	16	312,1078,124,120,87,185,163,226,122,135,143,183,207,242,131,4787,	0,10754,23138,25023,25935,26999,27496,28438,32689,33759,36502,38138,38814,40328,42196,43396,
chr1	114472385	114520432	TCONS_00000767	0	+	114472385	114520432	255,0,0	16	176,1078,124,120,87,185,163,226,122,135,140,183,207,242,131,4787,	0,10618,23002,24887,25799,26863,27360,28302,32553,33623,36369,38002,38678,40192,42060,43260,
chr1	114521836	114524876	TCONS_00000768	0	+	114521836	114524876	255,0,0	3	416,286,1306,	0,1117,1734,
chr1	116184609	116240840	TCONS_00000769	0	+	116184609	116240840	255,0,0	8	98,208,133,608,134,133,235,7101,	0,9288,17652,21672,40375,41955,43304,49130,
chr1	116915932	116940661	TCONS_00000771	0	+	116915932	116940661	255,0,0	15	213,111,60,204,114,135,118,269,199,110,135,193,176,137,152,	0,10703,11472,13977,14820,15327,15591,16128,16902,17471,19543,20220,21799,23287,24577,
chr1	116917014	116948878	TCONS_00000773	0	+	116917014	116948878	255,0,0	23	50,111,60,204,114,135,118,269,199,110,135,193,176,137,151,169,155,124,146,131,102,92,1841,	0,9621,10390,12895,13738,14245,14509,15046,15820,16389,18461,19138,20717,22205,23495,24228,24537,25027,26468,26737,27161,29491,30023,
chr1	117297077	117312040	TCONS_00000775	0	+	117297077	117312040	255,0,0	5	98,321,231,123,955,	0,175,5946,10028,14008,
chr1	117452175	117532964	TCONS_00000776	0	+	117452175	117532964	255,0,0	9	699,369,414,381,426,420,108,306,3542,	0,32161,35125,39638,51689,57357,64662,75126,77247,
chr1	117602931	117663456	TCONS_00000777	0	+	117602931	117663456	255,0,0	24	65,103,87,67,990,115,183,128,82,120,151,106,182,154,92,83,134,171,59,151,83,75,1616,41,	0,145,2077,13351,14560,15870,16331,17606,19258,21518,23708,26107,28491,29745,30222,31018,31507,32421,34999,35839,37041,38523,41070,60484,
chr1	120254495	120286835	TCONS_00000783	0	+	120254495	120286835	255,0,0	12	288,152,66,55,99,133,149,153,133,131,238,327,	0,9297,11503,14978,15131,22761,23422,25241,28513,29894,30934,32013,
chr1	120838763	120855681	TCONS_00000784	0	+	120838763	120855681	255,0,0	4	1222,78,125,1190,	0,3211,7231,15728,
chr1	121090839	121135063	TCONS_00000786	0	+	121090839	121135063	255,0,0	8	51,43,63,216,129,222,102,5569,	0,778,16314,24992,25847,33725,37527,38655,
chr1	121091613	121135063	TCONS_00000789	0	+	121091613	121135063	255,0,0	7	47,63,216,129,225,102,5569,	0,15540,24218,25073,32948,36753,37881,
chr1	121091615	121135063	TCONS_00000790	0	+	121091615	121135063	255,0,0	7	45,63,216,129,222,102,5569,	0,15538,24216,25071,32949,36751,37879,
chr1	121103492	121135063	TCONS_00000793	0	+	121103492	121135063	255,0,0	7	32,63,216,129,225,102,5569,	0,3661,12339,13194,21069,24874,26002,
chr1	121306632	121310623	TCONS_00000802	0	+	121306632	121310623	255,0,0	4	79,34,55,50,	0,929,3312,3941,
chr1	143913373	144095269	TCONS_00000805	0	+	143913373	144095269	255,0,0	6	547,609,193,163,63,48,	0,2326,100527,140132,180988,181848,
chr1	143913622	144095269	TCONS_00000806	0	+	143913622	144095269	255,0,0	7	298,609,193,163,43,63,48,	0,2077,100278,139883,165176,180739,181599,
chr1	143915405	144094428	TCONS_00000807	0	+	143915405	144094428	255,0,0	5	903,193,163,43,67,	0,98495,138100,163393,178956,
chr1	144013897	144094428	TCONS_00000809	0	+	144013897	144094428	255,0,0	4	196,163,43,67,	0,39608,64901,80464,
chr1	144013897	144094428	TCONS_00000810	0	+	144013897	144094428	255,0,0	4	196,61,163,67,	0,34811,39608,80464,
chr1	145096393	145119482	TCONS_00000817	0	+	145096393	145119482	255,0,0	5	228,110,161,147,3748,	0,7514,13130,15979,19341,
chr1	145209131	145283667	TCONS_00000819	0	+	145209131	145283667	255,0,0	5	305,74,260,336,1713,	0,39689,64053,72237,72823,
chr1	145320586	145324418	TCONS_00000821	0	+	145320586	145324418	255,0,0	6	33,173,52,173,52,71,	0,643,1537,2185,3067,3761,
chr1	145344166	145345772	TCONS_00000823	0	+	145344166	145345772	255,0,0	3	70,173,48,	0,666,1558,
chr1	145357574	145362142	TCONS_00000826	0	+	145357574	145362142	255,0,0	7	15,109,173,52,173,52,46,	0,729,1440,2332,2980,3874,4522,
chr1	145358348	145363078	TCONS_00000827	0	+	145358348	145363078	255,0,0	5	64,173,52,173,100,	0,666,1558,3748,4630,
chr1	145438479	145442754	TCONS_00000832	0	+	145438479	145442754	255,0,0	8	573,73,148,103,257,157,152,1572,	0,1113,1298,1558,1789,2152,2422,2703,
chr1	145517270	145523724	TCONS_00000842	0	+	145517270	145523724	255,0,0	3	118,202,1211,	0,800,5243,
chr1	146649803	146651391	TCONS_00000845	0	+	146649803	146651391	255,0,0	1	1588,	0,
chr1	146714219	146767442	TCONS_00000846	0	+	146714219	146767442	255,0,0	23	39,113,107,115,32,82,163,156,93,97,74,111,115,154,166,149,164,203,99,71,115,109,331,	0,10058,12305,13248,13965,17271,21861,23371,24865,26221,28373,29612,32797,33548,37479,41804,42781,43755,45094,48944,51072,51871,52892,
chr1	146714238	146767442	TCONS_00000847	0	+	146714238	146767442	255,0,0	23	242,113,107,115,32,82,163,156,93,97,74,111,115,154,166,149,164,203,99,71,115,109,331,	0,10039,12286,13229,13946,17252,21842,23352,24846,26202,28354,29593,32778,33529,37460,41785,42762,43736,45075,48925,51053,51852,52873,
chr1	146714801	146767442	TCONS_00000849	0	+	146714801	146767442	255,0,0	23	39,113,107,115,32,82,163,156,93,97,74,111,115,154,166,149,164,203,99,71,115,109,331,	0,9476,11723,12666,13383,16689,21279,22789,24283,25639,27791,29030,32215,32966,36897,41222,42199,43173,44512,48362,50490,51289,52310,
chr1	149754226	149763423	TCONS_00000859	0	+	149754226	149763423	255,0,0	6	104,21,255,252,285,631,	0,499,1332,5695,7383,8566,
chr1	149804183	149807730	TCONS_00000861	0	+	149804183	149807730	255,0,0	2	495,2030,	0,1517,
chr1	149804183	149807730	TCONS_00000862	0	+	149804183	149807730	255,0,0	2	1247,2030,	0,1517,
chr1	150039213	150117498	TCONS_00000870	0	+	150039213	150117498	255,0,0	15	794,135,61,80,69,138,111,135,114,168,159,108,122,132,612,	0,1473,5019,9097,9780,9958,10533,14210,14752,15586,24817,25182,26409,43397,77673,
chr1	150039834	150133821	TCONS_00000871	0	+	150039834	150133821	255,0,0	19	173,135,61,80,69,138,111,135,114,168,159,108,122,132,147,141,105,102,2808,	0,852,4398,8476,9159,9337,9912,13589,14131,14965,24196,24561,25788,42776,83267,88425,89270,89744,91179,
chr1	150122377	150135291	TCONS_00000879	0	+	150122377	150135291	255,0,0	7	100,147,141,105,102,1995,249,	0,724,5882,6727,7201,8636,12665,
chr1	150244866	150253435	TCONS_00000896	0	+	150244866	150253435	255,0,0	7	36,65,84,59,111,99,190,	0,335,1623,3283,4063,7187,8379,
chr1	150244867	150253435	TCONS_00000897	0	+	150244867	150253435	255,0,0	7	35,65,84,59,111,102,190,	0,334,1622,3282,4062,7183,8378,
chr1	150245138	150253435	TCONS_00000903	0	+	150245138	150253435	255,0,0	6	128,84,59,111,102,190,	0,1351,3011,3791,6912,8107,
chr1	150265984	150282171	TCONS_00000907	0	+	150265984	150282171	255,0,0	4	49,177,115,1690,	0,157,770,14497,
chr1	150265992	150282171	TCONS_00000908	0	+	150265992	150282171	255,0,0	3	41,728,1690,	0,149,14489,
chr1	150293545	150325758	TCONS_00000909	0	+	150293545	150325758	255,0,0	16	496,193,131,147,84,221,307,167,80,144,100,114,119,84,62,450,	0,3807,4663,7233,11609,11904,13860,17090,19328,22239,23092,23364,24948,25338,28087,31763,
chr1	150293846	150325758	TCONS_00000910	0	+	150293846	150325758	255,0,0	17	195,193,131,96,147,84,221,307,167,80,144,100,114,119,84,62,450,	0,3506,4362,6169,6932,11308,11603,13559,16789,19027,21938,22791,23063,24647,25037,27786,31462,
chr1	150293978	150325758	TCONS_00000911	0	+	150293978	150325758	255,0,0	17	63,193,131,96,147,84,221,307,167,75,144,100,114,119,84,62,450,	0,3374,4230,6037,6800,11176,11471,13427,16657,18900,21806,22659,22931,24515,24905,27654,31330,
chr1	150459907	150486280	TCONS_00000913	0	+	150459907	150486280	255,0,0	27	85,197,124,125,118,65,79,147,99,218,163,138,78,101,102,73,115,1364,51,102,81,81,323,375,221,88,568,	0,426,1532,3169,3962,4166,4979,9050,9378,10098,11070,11465,11784,16903,17200,17474,18159,19484,22099,22229,22490,22670,23444,24025,24920,25293,25805,
chr1	150521880	150541593	TCONS_00000944	0	+	150521880	150541593	255,0,0	20	95,74,104,58,356,697,103,137,205,173,112,186,130,205,177,204,180,145,928,33,	0,417,2800,3138,3493,4021,4960,6024,6757,7216,7534,7745,8089,8540,9068,9557,9882,10356,10655,19680,
chr1	150898749	150937388	TCONS_00000947	0	+	150898749	150937388	255,0,0	22	75,271,152,35,100,126,202,74,191,127,157,159,633,117,170,629,29,133,166,212,89,666,	0,1430,3693,13666,15055,16289,16578,17646,18644,20612,22848,23093,24184,25091,32904,34289,35856,36313,36700,37256,37721,37973,
chr1	150898838	150937388	TCONS_00000948	0	+	150898838	150937388	255,0,0	22	155,271,152,35,100,126,202,74,191,127,157,156,633,117,170,629,29,133,166,212,89,666,	0,1341,3604,13577,14966,16200,16489,17557,18555,20523,22759,23007,24095,25002,32815,34200,35767,36224,36611,37167,37632,37884,
chr1	150900177	150937388	TCONS_00000949	0	+	150900177	150937388	255,0,0	21	273,152,35,100,126,202,74,191,127,157,159,633,117,170,629,29,133,166,212,89,666,	0,2265,12238,13627,14861,15150,16218,17216,19184,21420,21665,22756,23663,31476,32861,34428,34885,35272,35828,36293,36545,
chr1	151129123	151141828	TCONS_00000953	0	+	151129123	151141828	255,0,0	9	75,835,382,71,89,98,89,195,367,	0,2018,9174,9823,10286,10473,10678,11496,12338,
chr1	21766804	21779951	TCONS_00000953_add	0	+	21766804	21779951	255,0,0	3	37,272,86,	0,4636,13061,
chr1	21771450	21782901	TCONS_00000954_add	0	+	21771450	21782901	255,0,0	2	262,1553,	0,9898,
chr1	21771458	21792256	TCONS_00000955_add	0	+	21771458	21792256	255,0,0	2	254,29,	0,20769,
chr1	151129125	151141828	TCONS_00000956	0	+	151129125	151141828	255,0,0	7	73,71,89,98,89,195,367,	0,9821,10284,10471,10676,11494,12336,
chr1	151171030	151222077	TCONS_00000961	0	+	151171030	151222077	255,0,0	15	527,35,81,131,118,153,300,206,84,49,85,147,130,46,1739,	0,25690,28765,33116,33693,33996,35642,38003,39627,40575,41400,43568,43883,48365,49308,
chr1	22328159	22339016	TCONS_00000961_add	0	+	22328159	22339016	255,0,0	8	51,86,98,135,137,143,153,74,	0,1336,3780,3995,5211,5706,8038,10783,
chr1	151171044	151222077	TCONS_00000962	0	+	151171044	151222077	255,0,0	15	513,32,81,131,118,153,300,206,84,49,85,147,130,46,1739,	0,25679,28751,33102,33679,33982,35628,37989,39613,40561,41386,43554,43869,48351,49294,
chr1	151227223	151240043	TCONS_00000964	0	+	151227223	151240043	255,0,0	10	61,141,115,87,69,216,109,132,68,395,	0,7413,9166,10084,10418,10646,11256,11560,11772,12425,
chr1	151371940	151374414	TCONS_00000966	0	+	151371940	151374414	255,0,0	7	263,207,147,82,117,89,122,	0,516,977,1299,1774,2077,2352,
chr1	151512704	151556229	TCONS_00000967	0	+	151512704	151556229	255,0,0	12	198,102,87,90,66,114,129,95,106,84,101,2110,	0,22356,23675,24296,25934,29428,34041,34682,38492,39420,40713,41415,
chr1	151512785	151556229	TCONS_00000968	0	+	151512785	151556229	255,0,0	13	117,75,102,87,90,66,114,129,95,106,84,101,2110,	0,21781,22275,23594,24215,25853,29347,33960,34601,38411,39339,40632,41334,
chr1	151584786	151671555	TCONS_00000975	0	+	151584786	151671555	255,0,0	12	71,232,193,65,105,79,164,90,150,129,60,5487,	0,26577,45924,48487,49855,53622,56161,71045,80124,80600,81113,81282,
chr1	151584796	151671555	TCONS_00000976	0	+	151584796	151671555	255,0,0	13	192,232,193,65,105,79,164,90,150,129,60,55,4710,	0,26567,45914,48477,49845,53612,56151,71035,80114,80590,81103,81272,82049,
chr1	151588295	151671555	TCONS_00000977	0	+	151588295	151671555	255,0,0	12	39,232,193,65,105,79,164,90,150,129,60,4710,	0,23068,42415,44978,46346,50113,52652,67536,76615,77091,77604,78550,
chr1	153330128	153333498	TCONS_00000979	0	+	153330128	153333498	255,0,0	3	229,165,379,	0,616,2991,
chr1	153605524	153618784	TCONS_00000980	0	+	153605524	153618784	255,0,0	6	1295,82,154,187,138,1245,	0,3523,5246,9194,10178,12015,
chr1	153605533	153618784	TCONS_00000981	0	+	153605533	153618784	255,0,0	6	1286,82,154,184,138,1245,	0,3514,5237,9188,10169,12006,
chr1	153606185	153618784	TCONS_00000982	0	+	153606185	153618784	255,0,0	5	634,1877,184,138,1245,	0,2862,8536,9517,11354,
chr1	153631038	153635091	TCONS_00000983	0	+	153631038	153635091	255,0,0	4	324,47,119,1416,	0,575,885,2637,
chr1	153650493	153666575	TCONS_00000990	0	+	153650493	153666575	255,0,0	23	453,992,200,114,136,92,136,85,121,75,78,105,72,157,156,169,147,124,69,175,99,92,748,	0,820,2483,3162,3686,4480,5358,5722,6946,7788,8105,8628,8998,9182,9616,10035,10935,11170,11435,11788,12266,15088,15334,
chr1	153652801	153666575	TCONS_00000991	0	+	153652801	153666575	255,0,0	21	375,114,136,92,136,85,121,75,78,105,72,157,156,169,147,124,69,175,99,92,748,	0,854,1378,2172,3050,3414,4638,5480,5797,6320,6690,6874,7308,7727,8627,8862,9127,9480,9958,12780,13026,
chr1	153653645	153666575	TCONS_00000992	0	+	153653645	153666575	255,0,0	20	124,136,92,136,85,121,75,78,105,72,157,156,169,147,124,69,175,99,92,748,	0,534,1328,2206,2570,3794,4636,4953,5476,5846,6030,6464,6883,7783,8018,8283,8636,9114,11936,12182,
chr1	153700534	153752722	TCONS_00001001	0	+	153700534	153752722	255,0,0	38	726,84,84,1799,145,130,98,192,88,80,92,107,120,130,55,104,45,120,154,69,76,114,49,168,101,73,157,139,1647,210,159,125,195,91,199,98,131,421,	0,12592,13226,18898,23036,24220,26583,29513,31467,32252,32768,33511,34669,35174,35773,36059,36631,36885,39615,40834,41710,42139,42626,43737,44281,44580,44866,45134,46459,48459,49003,49702,50102,50404,50628,51055,51284,51767,
chr1	153700548	153752722	TCONS_00001010	0	+	153700548	153752722	255,0,0	40	712,84,84,114,85,67,145,130,98,192,88,80,92,107,120,130,55,104,45,120,154,69,76,114,49,168,101,73,157,139,392,210,159,125,195,91,199,98,131,421,	0,12578,13212,18884,19206,20616,23022,24206,26569,29499,31453,32238,32754,33497,34655,35160,35759,36045,36617,36871,39601,40820,41696,42125,42612,43723,44267,44566,44852,45120,47700,48445,48989,49688,50088,50390,50614,51041,51270,51753,
chr1	153741824	153752722	TCONS_00001015	0	+	153741824	153752722	255,0,0	18	496,114,49,168,101,73,157,2009,392,210,159,125,195,91,199,98,131,421,	0,849,1336,2447,2991,3290,3576,3844,6424,7169,7713,8412,8812,9114,9338,9765,9994,10477,
chr1	153743934	153752722	TCONS_00001021	0	+	153743934	153752722	255,0,0	15	505,101,73,157,2009,333,210,159,125,195,91,199,98,131,421,	0,881,1180,1466,1734,4373,5059,5603,6302,6702,7004,7228,7655,7884,8367,
chr1	153744108	153752722	TCONS_00001027	0	+	153744108	153752722	255,0,0	14	331,101,73,157,2014,896,159,125,195,91,199,98,131,421,	0,707,1006,1292,1560,4199,5429,6128,6528,6830,7054,7481,7710,8193,
chr1	153744799	153752722	TCONS_00001028	0	+	153744799	153752722	255,0,0	14	117,73,157,1166,1647,210,159,125,195,91,199,98,131,421,	0,315,601,869,2194,4194,4738,5437,5837,6139,6363,6790,7019,7502,
chr1	153744799	153752722	TCONS_00001029	0	+	153744799	153752722	255,0,0	14	117,73,157,139,1647,210,159,125,195,91,199,98,131,421,	0,315,601,869,2194,4194,4738,5437,5837,6139,6363,6790,7019,7502,
chr1	153963242	153964730	TCONS_00001032	0	+	153963242	153964730	255,0,0	4	36,109,111,190,	0,348,799,1298,
chr1	154193394	154235992	TCONS_00001042	0	+	154193394	154235992	255,0,0	25	122,130,78,111,202,96,46,113,53,86,172,199,278,173,190,55,175,73,196,89,54,82,218,106,414,	0,4165,6363,7696,13672,14277,15647,16105,20594,22298,25285,28320,30122,30562,32981,33917,34233,34764,36144,36427,38058,39029,39973,40673,42184,
chr1	154193410	154244150	TCONS_00001054	0	+	154193410	154244150	255,0,0	29	41,130,78,111,169,96,46,113,53,98,86,172,199,278,173,190,55,175,73,196,89,54,82,218,106,68,198,51,1475,	0,4149,6347,7680,13656,14261,15631,16089,20578,20765,22282,25269,28304,30106,30546,32965,33901,34217,34748,36128,36411,38042,39013,39957,40657,45566,47822,48427,49265,
chr1	154193410	154244150	TCONS_00001055	0	+	154193410	154244150	255,0,0	27	41,130,78,111,169,96,46,113,53,86,172,199,278,173,190,55,175,73,196,89,54,82,218,106,68,198,794,	0,4149,6347,7680,13656,14261,15631,16089,20578,22282,25269,28304,30106,30546,32965,33901,34217,34748,36128,36411,38042,39013,39957,40657,45566,47822,49946,
chr1	154193415	154244150	TCONS_00001058	0	+	154193415	154244150	255,0,0	27	36,130,78,111,169,96,46,113,53,86,172,199,278,173,190,55,175,73,196,89,54,82,218,106,68,195,1475,	0,4144,6342,7675,13651,14256,15626,16084,20573,22277,25264,28299,30101,30541,32960,33896,34212,34743,36123,36406,38037,39008,39952,40652,45561,47820,49260,
chr1	154377837	154441923	TCONS_00001071	0	+	154377837	154441923	255,0,0	10	353,249,124,182,167,142,47,70,94,4314,	0,23834,25121,29157,29628,30607,42763,44549,49126,59772,
chr1	154401670	154441923	TCONS_00001073	0	+	154401670	154441923	255,0,0	9	250,124,182,167,142,47,70,94,4314,	0,1288,5324,5795,6774,18930,20716,25293,35939,
chr1	154947127	154953523	TCONS_00001074	0	+	154947127	154953523	255,0,0	3	153,128,2323,	0,3335,4073,
chr1	154955818	154965791	TCONS_00001075	0	+	154955818	154965791	255,0,0	8	55,225,745,148,99,190,74,414,	0,499,4762,6217,6816,6996,9370,9559,
chr1	154955829	154961472	TCONS_00001076	0	+	154955829	154961472	255,0,0	3	44,225,892,	0,488,4751,
chr1	154975117	154991073	TCONS_00001078	0	+	154975117	154991073	255,0,0	4	45,101,1160,2378,	0,201,12013,13578,
chr1	154975119	154991073	TCONS_00001080	0	+	154975119	154991073	255,0,0	6	43,101,140,100,1160,2378,	0,199,7614,8272,12011,13576,
chr1	154975248	154991073	TCONS_00001081	0	+	154975248	154991073	255,0,0	6	171,140,100,79,1160,2378,	0,7485,8143,11242,11882,13447,
chr1	154975248	154991073	TCONS_00001082	0	+	154975248	154991073	255,0,0	3	171,1160,2378,	0,11882,13447,
chr1	155023761	155035288	TCONS_00001094	0	+	155023761	155035288	255,0,0	23	180,107,77,79,77,193,63,69,170,85,149,175,93,305,196,78,73,139,70,72,72,125,353,	0,1385,2131,2624,2864,3028,4504,4646,4794,5100,5667,5902,6351,6565,6960,7424,8616,8919,9477,10132,10618,10959,11174,
chr1	155023788	155035288	TCONS_00001100	0	+	155023788	155035288	255,0,0	21	153,107,77,79,77,193,63,69,170,85,149,175,93,305,196,78,73,139,70,955,353,	0,1358,2104,2597,2837,3001,4477,4619,4767,5073,5640,5875,6324,6538,6933,7397,8589,8892,9450,10102,11147,
chr1	155023825	155035288	TCONS_00001106	0	+	155023825	155035288	255,0,0	23	116,137,77,79,77,193,63,69,170,85,149,175,93,305,196,78,73,139,70,75,72,125,353,	0,1291,2067,2560,2800,2964,4440,4582,4730,5036,5603,5838,6287,6501,6896,7360,8552,8855,9413,10065,10554,10895,11110,
chr1	155107819	155111418	TCONS_00001114	0	+	155107819	155111418	255,0,0	6	255,78,124,162,120,763,	0,955,1484,2217,2635,2836,
chr1	155107824	155111418	TCONS_00001116	0	+	155107824	155111418	255,0,0	6	332,78,124,162,120,763,	0,950,1479,2212,2630,2831,
chr1	155107863	155111418	TCONS_00001118	0	+	155107863	155111418	255,0,0	6	604,78,124,162,120,763,	0,911,1440,2173,2591,2792,
chr1	155108313	155111418	TCONS_00001119	0	+	155108313	155111418	255,0,0	5	154,78,162,120,763,	0,461,1723,2141,2342,
chr1	155178722	155184265	TCONS_00001121	0	+	155178722	155184265	255,0,0	9	140,136,70,80,93,183,77,155,991,	0,265,1414,1616,3195,3453,3762,4305,4552,
chr1	155278602	155291902	TCONS_00001124	0	+	155278602	155291902	255,0,0	11	154,142,141,81,123,89,73,78,135,583,424,	0,1252,3443,9129,9357,9853,10044,10799,10982,11597,12876,
chr1	155278644	155291902	TCONS_00001128	0	+	155278644	155291902	255,0,0	11	112,163,141,81,123,89,73,78,135,583,424,	0,1189,3401,9087,9315,9811,10002,10757,10940,11555,12834,
chr1	155292792	155300988	TCONS_00001129	0	+	155292792	155300988	255,0,0	9	129,99,77,175,106,47,553,126,795,	0,1843,2100,2314,2565,2862,3578,5148,7401,
chr1	155658311	155708760	TCONS_00001136	0	+	155658311	155708760	255,0,0	14	46,80,52,123,102,109,93,131,81,159,60,90,118,813,	0,574,21252,28485,32996,36861,37406,39087,40521,40687,42835,43423,48425,49636,
chr1	155658649	155708760	TCONS_00001140	0	+	155658649	155708760	255,0,0	14	79,149,52,123,102,109,93,131,81,159,60,90,118,813,	0,236,20914,28147,32658,36523,37068,38749,40183,40349,42497,43085,48087,49298,
chr1	156024542	156028399	TCONS_00001143	0	+	156024542	156028399	255,0,0	4	206,163,90,294,	0,511,3226,3563,
chr1	156052489	156107658	TCONS_00001145	0	+	156052489	156107658	255,0,0	11	25,605,157,126,171,126,221,223,108,120,214,	0,31971,47918,51704,52106,52488,53202,53515,54222,54414,54955,
chr1	156084043	156109875	TCONS_00001148	0	+	156084043	156109875	255,0,0	13	32,605,157,126,171,126,221,223,108,120,90,270,1005,	0,417,16364,20150,20552,20934,21648,21961,22668,22860,23401,24235,24827,
chr1	156123508	156149075	TCONS_00001151	0	+	156123508	156149075	255,0,0	15	47,168,161,63,99,106,117,125,173,151,181,119,158,101,2880,	0,832,2696,4352,4670,5001,6725,7187,7628,9226,19108,21104,21368,21838,22687,
chr1	156124231	156149075	TCONS_00001152	0	+	156124231	156149075	255,0,0	14	277,161,63,99,106,117,125,173,151,181,119,158,101,2880,	0,1973,3629,3947,4278,6002,6464,6905,8503,18385,20381,20645,21115,21964,
chr1	156163501	156209823	TCONS_00001154	0	+	156163501	156209823	255,0,0	8	537,638,128,2937,106,101,196,485,	0,6124,14175,16529,38609,39917,42577,45837,
chr1	156561553	156565641	TCONS_00001155	0	+	156561553	156565641	255,0,0	6	225,109,111,114,148,1968,	0,339,603,795,1646,2120,
chr1	156736951	156770602	TCONS_00001158	0	+	156736951	156770602	255,0,0	7	1080,48,567,96,144,66,437,	0,15122,19448,24537,27505,30116,33214,
chr1	158223925	158228111	TCONS_00001162	0	+	158223925	158228111	255,0,0	6	592,267,279,279,91,641,	0,948,1868,2650,3285,3545,
chr1	158224175	158228111	TCONS_00001163	0	+	158224175	158228111	255,0,0	6	342,267,279,114,91,641,	0,698,1618,2400,3035,3295,
chr1	158259483	158264735	TCONS_00001165	0	+	158259483	158264735	255,0,0	4	432,267,282,2350,	0,1440,2390,2902,
chr1	158259562	158264735	TCONS_00001170	0	+	158259562	158264735	255,0,0	6	353,267,282,279,91,1491,	0,1361,2311,2823,3439,3682,
chr1	158323525	158327376	TCONS_00001180	0	+	158323525	158327376	255,0,0	6	311,297,270,279,94,859,	0,641,1564,2091,2762,2992,
chr1	158323544	158327376	TCONS_00001185	0	+	158323544	158327376	255,0,0	4	292,279,94,823,	0,2072,2743,3009,
chr1	158323646	158327376	TCONS_00001197	0	+	158323646	158327376	255,0,0	6	190,297,270,175,94,823,	0,520,1443,1970,2641,2907,
chr1	158801073	158819293	TCONS_00001200	0	+	158801073	158819293	255,0,0	7	274,285,137,168,417,189,314,	0,10850,11995,12671,14303,16444,17906,
chr1	158975699	159026362	TCONS_00001202	0	+	158975699	159026362	255,0,0	13	132,159,285,116,168,423,189,168,168,168,420,192,1752,	0,4093,8751,9962,10623,12319,14431,26614,39387,43522,45769,47623,48911,
chr1	158979667	159026362	TCONS_00001204	0	+	158979667	159026362	255,0,0	11	284,285,116,168,423,189,168,168,420,192,1752,	0,4783,5994,6655,8351,10463,22646,35419,41801,43655,44943,
chr1	159141125	159176271	TCONS_00001211	0	+	159141125	159176271	255,0,0	10	518,141,153,138,171,91,170,126,4177,1021,	0,20600,21242,22087,22534,25028,25555,28415,29468,34125,
chr1	159159604	159176271	TCONS_00001212	0	+	159159604	159176271	255,0,0	10	58,141,153,138,171,91,170,126,4177,1021,	0,2121,2763,3608,4055,6549,7076,9936,10989,15646,
chr1	159267692	159278117	TCONS_00001221	0	+	159267692	159278117	255,0,0	6	118,114,21,255,258,580,	0,4403,4951,6025,8085,9845,
chr1	159750777	159752445	TCONS_00001227	0	+	159750777	159752445	255,0,0	3	13,269,503,	0,111,1165,
chr1	159796497	159807927	TCONS_00001229	0	+	159796497	159807927	255,0,0	5	231,327,306,108,2954,	0,3158,6168,6554,8476,
chr1	160175138	160185186	TCONS_00001230	0	+	160175138	160185186	255,0,0	4	174,174,156,1975,	0,6194,7761,8073,
chr1	160312919	160328959	TCONS_00001233	0	+	160312919	160328959	255,0,0	17	352,105,124,122,146,151,110,153,105,78,173,103,96,88,155,213,1021,	0,1592,5869,6419,6975,8092,8566,8924,9757,10030,10988,12525,12733,13130,13470,13911,15019,
chr1	160709030	160732970	TCONS_00001241	0	+	160709030	160732970	255,0,0	8	116,321,273,120,104,63,5369,265,	0,8953,10580,11063,12104,12945,13865,23675,
chr1	161087737	161092375	TCONS_00001249	0	+	161087737	161092375	255,0,0	7	231,96,255,104,134,126,2087,	0,838,1186,1561,1871,2159,2551,
chr1	161102544	161128747	TCONS_00001252	0	+	161102544	161128747	255,0,0	7	26,195,68,64,77,91,546,	0,21171,24195,24499,24862,25366,25657,
chr1	161123554	161128747	TCONS_00001255	0	+	161123554	161128747	255,0,0	6	356,68,64,77,91,546,	0,3185,3489,3852,4356,4647,
chr1	161171127	161184192	TCONS_00001259	0	+	161171127	161184192	255,0,0	15	86,112,107,191,121,113,75,78,86,120,130,96,84,58,247,	0,1031,2099,5069,7855,8145,8519,8773,8966,9253,11013,12042,12311,12526,12818,
chr1	161173165	161184192	TCONS_00001263	0	+	161173165	161184192	255,0,0	13	168,191,121,113,75,78,86,120,130,96,84,58,247,	0,3031,5817,6107,6481,6735,6928,7215,8975,10004,10273,10488,10780,
chr1	161184989	161189120	TCONS_00001264	0	+	161184989	161189120	255,0,0	5	171,92,36,21,450,	0,2786,3041,3503,3681,
chr1	161284039	161340110	TCONS_00001268	0	+	161284039	161340110	255,0,0	6	176,57,102,62,164,7992,	0,9364,14146,26344,42427,48079,
chr1	27668509	27680615	TCONS_00001277_add	0	+	27668509	27680615	255,0,0	15	132,229,149,73,46,73,101,114,161,97,159,79,100,206,412,	0,3278,5402,5789,5948,7061,7379,7633,7953,8370,8775,9239,9437,11264,11694,
chr1	27668523	27677121	TCONS_00001280_add	0	+	27668523	27677121	255,0,0	9	118,229,149,73,46,73,101,114,242,	0,3264,5388,5775,5934,7047,7365,7619,8356,
chr1	27676761	27677815	TCONS_00001291_add	0	+	27676761	27677815	255,0,0	4	26,97,159,67,	0,118,523,987,
chr1	28052472	28089628	TCONS_00001295_add	0	+	28052472	28089628	255,0,0	9	200,65,55,153,158,87,136,102,2623,	0,1510,6641,8069,18692,23106,29233,33564,34533,
chr1	161475223	161498571	TCONS_00001297	0	+	161475223	161498571	255,0,0	10	119,21,255,255,123,38,1686,190,147,35,	0,553,903,4386,5400,8461,12541,14368,17856,23313,
chr1	28052564	28086799	TCONS_00001298_add	0	+	28052564	28086799	255,0,0	8	108,65,55,153,158,136,102,331,	0,1418,6549,7977,18600,29141,33472,33904,
chr1	28053991	28060696	TCONS_00001300_add	0	+	28053991	28060696	255,0,0	3	56,55,155,	0,5122,6550,
chr1	161551120	161649265	TCONS_00001333	0	+	161551120	161649265	255,0,0	7	219,21,258,255,114,38,2000,	0,7091,90061,91644,92629,95997,96145,
chr1	161551125	161571727	TCONS_00001334	0	+	161551125	161571727	255,0,0	6	214,21,255,255,114,6385,	0,7086,8229,9808,10793,14217,
chr1	161601083	161649265	TCONS_00001341	0	+	161601083	161649265	255,0,0	8	24,209,21,258,255,114,38,2000,	0,31851,38958,40098,41681,42666,46034,46182,
chr1	161613829	161649265	TCONS_00001342	0	+	161613829	161649265	255,0,0	8	69,209,21,258,255,114,38,2000,	0,19105,26212,27352,28935,29920,33288,33436,
chr1	161719113	161726947	TCONS_00001343	0	+	161719113	161726947	255,0,0	6	822,114,119,97,187,372,	0,2344,2542,3044,3751,7462,
chr1	161719589	161726947	TCONS_00001344	0	+	161719589	161726947	255,0,0	6	346,127,119,97,187,372,	0,1855,2066,2568,3275,6986,
chr1	161736037	161934219	TCONS_00001345	0	+	161736037	161934219	255,0,0	16	195,77,88,107,130,204,221,186,92,132,114,100,71,115,85,5984,	0,11996,15664,17742,25160,25876,35804,53385,54822,80201,85474,86976,93959,96950,146048,192198,
chr1	162467785	162499392	TCONS_00001346	0	+	162467785	162499392	255,0,0	8	273,293,192,95,77,99,89,7199,	0,1959,2917,5758,14504,14729,20106,24408,
chr1	162531356	162570258	TCONS_00001347	0	+	162531356	162570258	255,0,0	10	211,337,205,176,173,194,141,189,67,1198,	0,4445,15210,17861,19720,25908,27126,28756,36225,37704,
chr1	163291755	163325625	TCONS_00001349	0	+	163291755	163325625	255,0,0	14	247,143,75,77,62,98,74,97,63,138,141,176,136,501,	0,4066,5522,6262,6880,14785,16054,17415,18398,21767,23712,25797,26979,33369,
chr1	165600427	165625338	TCONS_00001350	0	+	165600427	165625338	255,0,0	6	103,124,74,58,73,734,	0,18650,19823,20787,23088,24177,
chr1	166808550	166824180	TCONS_00001353	0	+	166808550	166824180	255,0,0	5	291,134,127,99,6006,	0,1641,7298,8180,9624,
chr1	166808695	166824180	TCONS_00001354	0	+	166808695	166824180	255,0,0	6	146,134,127,99,1486,2359,	0,1496,7153,8035,9479,13126,
chr1	166808941	166824180	TCONS_00001355	0	+	166808941	166824180	255,0,0	6	65,134,127,99,1486,2359,	0,1250,6907,7789,9233,12880,
chr1	167599482	167677935	TCONS_00001357	0	+	167599482	167677935	255,0,0	7	184,102,90,72,204,744,4035,	0,53654,55175,59803,63853,66853,74418,
chr1	167658984	167677935	TCONS_00001358	0	+	167658984	167677935	255,0,0	4	373,204,744,4035,	0,4351,7351,14916,
chr1	167690507	167760248	TCONS_00001362	0	+	167690507	167760248	255,0,0	6	58,624,167,214,133,3192,	0,348,44312,51004,51965,66549,
chr1	167690558	167760248	TCONS_00001363	0	+	167690558	167760248	255,0,0	7	70,624,167,214,133,103,3192,	0,297,44261,50953,51914,54742,66498,
chr1	167906090	168045078	TCONS_00001368	0	+	167906090	168045078	255,0,0	21	156,62,93,186,114,136,215,94,120,261,123,60,118,116,87,328,139,157,89,106,470,	0,14947,29776,37977,50642,54351,56373,65629,67017,67680,82692,86135,101518,106172,107732,108047,126768,128737,129524,131505,138518,
chr1	167962461	168045078	TCONS_00001369	0	+	167962461	168045078	255,0,0	13	217,94,120,261,118,116,87,328,139,157,89,106,470,	0,9258,10646,11309,45147,49801,51361,51676,70397,72366,73153,75134,82147,
chr1	167962461	168045078	TCONS_00001370	0	+	167962461	168045078	255,0,0	14	217,94,120,261,60,118,116,87,328,139,157,89,106,470,	0,9258,10646,11309,29764,45147,49801,51361,51676,70397,72366,73153,75134,82147,
chr1	168115310	168171346	TCONS_00001371	0	+	168115310	168171346	255,0,0	8	28,334,180,100,132,96,63,2206,	0,32775,37829,38706,45296,50474,52846,53830,
chr1	168193066	168222603	TCONS_00001373	0	+	168193066	168222603	255,0,0	8	2314,87,86,82,36,59,30,10865,	0,7685,8005,11272,12760,12883,15302,18672,
chr1	168195191	168283657	TCONS_00001375	0	+	168195191	168283657	255,0,0	15	189,87,86,82,36,59,30,569,265,135,62,62,189,136,1712,	0,5560,5880,9147,10635,10758,13177,16547,65206,67190,71770,74468,79054,82788,86754,
chr1	168195240	168222603	TCONS_00001376	0	+	168195240	168222603	255,0,0	9	140,87,86,82,36,59,30,569,7779,	0,5511,5831,9098,10586,10709,13128,16498,19584,
chr1	168545586	168551353	TCONS_00001378	0	+	168545586	168551353	255,0,0	4	82,148,115,1064,	0,202,3714,4703,
chr1	169075565	169102169	TCONS_00001379	0	+	169075565	169102169	255,0,0	6	599,129,156,185,81,1640,	0,5042,18556,20896,23682,24964,
chr1	169337224	169362585	TCONS_00001382	0	+	169337224	169362585	255,0,0	7	376,78,440,200,129,220,6351,	0,1486,8553,10343,12494,14075,19010,
chr1	169337224	169362585	TCONS_00001383	0	+	169337224	169362585	255,0,0	7	724,78,440,200,129,220,6351,	0,1486,8553,10343,12494,14075,19010,
chr1	169337232	169362585	TCONS_00001385	0	+	169337232	169362585	255,0,0	8	348,78,440,98,200,129,220,6351,	0,1478,8545,9143,10335,12486,14067,19002,
chr1	169337446	169368331	TCONS_00001386	0	+	169337446	169368331	255,0,0	8	134,78,440,200,129,220,213,3200,	0,1264,8331,10121,12272,13853,18788,27685,
chr1	171454660	171562649	TCONS_00001403	0	+	171454660	171562649	255,0,0	35	214,169,178,95,126,224,83,134,88,145,54,619,170,250,211,2259,209,155,904,86,189,252,93,102,202,204,113,137,232,123,219,104,127,53,1924,	0,26510,27473,29014,30212,32069,36655,37699,37913,39299,42269,46821,49906,50507,51741,54449,59957,64564,71718,75496,80711,81070,82725,85798,89405,91912,93832,94306,98434,98897,101481,102126,102857,105630,106065,
chr1	171454662	171562649	TCONS_00001404	0	+	171454662	171562649	255,0,0	34	212,169,178,95,126,224,83,134,88,145,54,619,170,250,211,2259,209,155,904,86,189,252,93,102,202,204,113,137,232,108,219,104,127,1924,	0,26508,27471,29012,30210,32067,36653,37697,37911,39297,42267,46819,49904,50505,51739,54447,59955,64562,71716,75494,80709,81068,82723,85796,89403,91910,93830,94304,98432,98895,101479,102124,102855,106063,
chr1	171537384	171562649	TCONS_00001407	0	+	171537384	171562649	255,0,0	12	94,102,202,204,113,137,232,108,219,104,127,1924,	0,3074,6681,9188,11108,11582,15710,16173,18757,19402,20133,23341,
chr1	171750633	171766957	TCONS_00001408	0	+	171750633	171766957	255,0,0	8	627,760,200,196,165,219,132,1336,	0,2246,4385,6241,8958,10523,12902,14988,
chr1	172501450	172580969	TCONS_00001409	0	+	172501450	172580969	255,0,0	24	1187,115,111,155,138,151,124,125,68,108,106,21,56,92,66,69,91,1167,88,105,155,92,56,2014,	0,19201,20949,23558,24969,25333,36708,37736,38352,41580,43207,45228,45453,45987,46891,52707,53547,56449,58673,67753,69753,70385,76436,77505,
chr1	172502153	172580969	TCONS_00001410	0	+	172502153	172580969	255,0,0	23	484,115,155,138,151,124,125,68,108,106,21,56,92,66,69,91,1167,88,105,155,92,56,2014,	0,18498,22855,24266,24630,36005,37033,37649,40877,42504,44525,44750,45284,46188,52004,52844,55746,57970,67050,69050,69682,75733,76802,
chr1	173446432	173458054	TCONS_00001412	0	+	173446432	173458054	255,0,0	5	199,157,147,147,1181,	0,4032,8067,8961,10441,
chr1	174128658	174964616	TCONS_00001414	0	+	174128658	174964616	255,0,0	26	137,171,193,211,175,158,111,67,103,167,142,94,151,114,75,126,144,42,129,93,111,105,84,72,198,5631,	0,59604,61451,71624,81962,90954,92959,112893,116312,119092,145465,211458,234474,477854,524001,540004,542592,592792,652311,797935,809755,816556,819285,823312,829119,830327,
chr1	174128672	174931288	TCONS_00001415	0	+	174128672	174931288	255,0,0	21	123,171,193,211,175,158,111,67,103,167,142,94,151,114,75,126,144,42,129,93,4261,	0,59590,61437,71610,81948,90940,92945,112879,116298,119078,145451,211444,234460,477840,523987,539990,542578,592778,652297,797921,798355,
chr1	174843506	174964616	TCONS_00001417	0	+	174843506	174964616	255,0,0	10	138,214,93,283,111,105,84,72,198,5631,	0,3023,83087,83521,94907,101708,104437,108464,114271,115479,
chr1	174843516	174964616	TCONS_00001419	0	+	174843516	174964616	255,0,0	9	128,93,283,111,105,84,72,198,5631,	0,83077,83511,94897,101698,104427,108454,114261,115469,
chr1	174969094	174984008	TCONS_00001424	0	+	174969094	174984008	255,0,0	6	237,220,97,100,98,4950,	0,4655,6786,7139,8650,9964,
chr1	178060647	178447951	TCONS_00001425	0	+	178060647	178447951	255,0,0	18	3182,128,127,107,110,154,99,555,145,145,237,202,200,862,135,203,88,5742,	0,192051,208479,298587,328998,347909,350036,351162,354005,360058,360903,362934,365187,366170,372765,374407,375821,381562,
chr1	178062946	178447951	TCONS_00001426	0	+	178062946	178447951	255,0,0	18	883,128,127,107,110,154,99,555,145,145,237,202,179,862,135,203,88,5742,	0,189752,206180,296288,326699,345610,347737,348863,351706,357759,358604,360635,362909,363871,370466,372108,373522,379263,
chr1	178694402	178891263	TCONS_00001427	0	+	178694402	178891263	255,0,0	20	152,140,105,51,84,90,93,127,138,91,68,136,152,55,78,106,93,106,92,5799,	0,51414,59150,60289,82777,86047,96344,108156,152230,153634,158198,159808,160701,164374,166962,168651,172396,176838,181508,191062,
chr1	178994973	179045959	TCONS_00001429	0	+	178994973	179045959	255,0,0	8	20,510,87,110,172,192,60,4912,	0,17876,24440,28690,38088,38466,40961,46074,
chr1	178995189	179045959	TCONS_00001430	0	+	178995189	179045959	255,0,0	8	44,510,87,110,172,192,60,4912,	0,17660,24224,28474,37872,38250,40745,45858,
chr1	179050167	179068038	TCONS_00001432	0	+	179050167	179068038	255,0,0	6	1355,114,266,179,125,3936,	0,1907,4595,6878,13060,13935,
chr1	179051299	179068038	TCONS_00001433	0	+	179051299	179068038	255,0,0	6	223,269,266,179,125,3936,	0,620,3463,5746,11928,12803,
chr1	179262115	179327891	TCONS_00001434	0	+	179262115	179327891	255,0,0	16	956,126,59,152,60,108,283,79,82,46,130,98,99,136,146,5172,	0,9696,30456,42525,44856,46457,48047,49133,49881,50609,51966,54619,55863,57315,58336,60604,
chr1	179263253	179327891	TCONS_00001435	0	+	179263253	179327891	255,0,0	16	283,126,59,152,60,108,283,79,82,46,130,98,99,136,146,5172,	0,8558,29318,41387,43718,45319,46909,47995,48743,49471,50828,53481,54725,56177,57198,59466,
chr1	179281673	179311328	TCONS_00001436	0	+	179281673	179311328	255,0,0	7	149,59,152,60,108,283,80,	0,10898,22967,25298,26899,28489,29575,
chr1	179851127	179890077	TCONS_00001438	0	+	179851127	179890077	255,0,0	10	985,78,57,42,87,57,42,69,57,3491,	0,2699,7320,18133,19309,21973,25830,26612,32005,35459,
chr1	179851157	179890077	TCONS_00001439	0	+	179851157	179890077	255,0,0	11	116,677,78,57,42,87,57,42,69,57,3491,	0,278,2669,7290,18103,19279,21943,25800,26582,31975,35429,
chr1	179851163	179890077	TCONS_00001440	0	+	179851163	179890077	255,0,0	11	110,677,78,60,42,87,57,42,69,57,3491,	0,272,2663,7281,18097,19273,21937,25794,26576,31969,35423,
chr1	179851205	179890077	TCONS_00001441	0	+	179851205	179890077	255,0,0	11	68,736,78,57,42,87,57,42,69,57,3491,	0,171,2621,7242,18055,19231,21895,25752,26534,31927,35381,
chr1	179922756	180083999	TCONS_00001444	0	+	179922756	180083999	255,0,0	38	1521,86,44,115,160,623,114,114,147,659,122,1061,151,152,175,221,164,111,141,137,123,170,197,185,88,147,158,200,212,145,161,140,83,2003,408,147,123,3868,	0,32547,33621,36885,38440,42931,49552,52832,58307,60225,62227,66327,69076,70809,77698,80240,83304,87516,88040,89434,90429,94914,99348,100128,100793,108598,111493,121400,124841,126895,130396,133956,137092,138992,141901,142416,145241,157375,
chr1	179942287	180083999	TCONS_00001446	0	+	179942287	180083999	255,0,0	38	21,86,44,115,160,623,114,114,147,659,122,1061,151,164,175,221,164,111,141,137,123,170,197,185,88,147,158,200,212,145,161,140,83,2003,408,147,123,3868,	0,13016,14090,17354,18909,23400,30021,33301,38776,40694,42696,46796,49545,51266,58167,60709,63773,67985,68509,69903,70898,75383,79817,80597,81262,89067,91962,101869,105310,107364,110865,114425,117561,119461,122370,122885,125710,137844,
chr1	179955302	180083999	TCONS_00001447	0	+	179955302	180083999	255,0,0	38	87,44,115,160,623,114,114,147,659,122,1061,151,164,175,221,164,111,141,137,123,170,197,185,88,147,158,200,212,145,161,140,83,2003,408,147,123,199,2428,	0,1075,4339,5894,10385,17006,20286,25761,27679,29681,33781,36530,38251,45152,47694,50758,54970,55494,56888,57883,62368,66802,67582,68247,76052,78947,88854,92295,94349,97850,101410,104546,106446,109355,109870,112695,124829,126269,
chr1	179958928	180083999	TCONS_00001448	0	+	179958928	180083999	255,0,0	36	29,115,160,623,114,114,147,659,122,1061,151,164,175,221,164,111,141,137,123,170,197,185,88,147,158,200,212,145,161,140,83,2003,408,147,123,3868,	0,713,2268,6759,13380,16660,22135,24053,26055,30155,32904,34625,41526,44068,47132,51344,51868,53262,54257,58742,63176,63956,64621,72426,75321,85228,88669,90723,94224,97784,100920,102820,105729,106244,109069,121203,
chr1	180123983	180171506	TCONS_00001451	0	+	180123983	180171506	255,0,0	12	324,101,46,103,91,146,135,130,123,148,180,6110,	0,11642,20472,21082,23945,27325,29067,31204,34703,35584,39364,41413,
chr1	180123983	180171506	TCONS_00001452	0	+	180123983	180171506	255,0,0	13	324,101,46,103,91,146,135,130,123,148,180,338,5039,	0,11642,20472,21082,23945,27325,29067,31204,34703,35584,39364,41413,42484,
chr1	181002448	181031085	TCONS_00001457	0	+	181002448	181031085	255,0,0	7	122,188,261,276,276,105,6725,	0,574,15739,16698,18922,20260,21912,
chr1	181002995	181031085	TCONS_00001459	0	+	181002995	181031085	255,0,0	5	215,261,276,105,6725,	0,15192,16151,19713,21365,
chr1	181056205	181062262	TCONS_00001460	0	+	181056205	181062262	255,0,0	1	6057,	0,
chr1	181056315	181062262	TCONS_00001461	0	+	181056315	181062262	255,0,0	2	1566,3834,	0,2113,
chr1	182758799	182801033	TCONS_00001462	0	+	182758799	182801033	255,0,0	11	2622,84,74,88,58,76,93,149,47,40,3175,	0,4691,14033,16480,22491,25118,27049,28876,29148,36116,39059,
chr1	182758840	182801033	TCONS_00001465	0	+	182758840	182801033	255,0,0	12	1934,55,84,74,88,58,76,93,149,47,40,3175,	0,2526,4650,13992,16439,22450,25077,27008,28835,29107,36075,39018,
chr1	182758896	182857111	TCONS_00001470	0	+	182758896	182857111	255,0,0	40	44,55,84,74,88,58,76,93,149,47,85,40,1704,133,141,112,113,149,47,137,90,162,78,192,142,83,157,101,214,95,74,153,161,112,162,128,230,116,201,894,	0,2470,4594,13936,16383,22394,25021,26952,28779,29051,32353,36019,38962,52783,53532,62471,63544,64268,66770,68342,68789,68971,69278,70231,76682,77199,82575,85092,86288,86685,87068,88259,89488,90735,91502,91758,93377,93758,94851,97321,
chr1	182758913	182801033	TCONS_00001477	0	+	182758913	182801033	255,0,0	12	126,55,84,74,88,58,76,93,149,47,40,3175,	0,2453,4577,13919,16366,22377,25004,26935,28762,29034,36002,38945,
chr1	182808457	182857111	TCONS_00001484	0	+	182808457	182857111	255,0,0	28	134,133,141,112,113,149,47,137,90,162,78,192,142,83,157,101,214,95,74,153,161,112,162,128,230,116,201,894,	0,3222,3971,12910,13983,14707,17209,18781,19228,19410,19717,20670,27121,27638,33014,35531,36727,37124,37507,38698,39927,41174,41941,42197,43816,44197,45290,47760,
chr1	182808458	182857111	TCONS_00001485	0	+	182808458	182857111	255,0,0	29	133,133,141,112,113,149,137,47,137,90,162,78,192,142,83,157,101,214,95,74,153,161,112,162,128,230,116,201,894,	0,3221,3970,12909,13982,14706,16253,17208,18780,19227,19409,19716,20669,27120,27637,33013,35530,36726,37123,37506,38697,39926,41173,41940,42196,43815,44196,45289,47759,
chr1	32538544	32568544	TCONS_00001487_add	0	+	32538544	32568544	255,0,0	7	108,127,220,337,188,121,513,	0,2007,2659,18731,21840,27498,29487,
chr1	182992442	183114795	TCONS_00001488	0	+	182992442	183114795	255,0,0	28	827,305,131,167,189,118,99,137,123,190,113,222,189,246,154,143,179,157,206,80,138,145,150,115,200,159,100,3127,	0,80020,84968,87180,91223,92212,93269,93459,94012,94226,94726,98415,98755,101323,102089,102812,103918,105286,107036,107991,109092,110098,111352,111734,113078,114361,117096,119226,
chr1	32538682	32541400	TCONS_00001496_add	0	+	32538682	32541400	255,0,0	3	17,127,197,	0,1869,2521,
chr1	183441628	183528891	TCONS_00001500	0	+	183441628	183528891	255,0,0	22	156,32,118,195,172,72,151,136,163,157,71,61,120,427,145,383,372,81,160,171,146,7939,	0,40343,43380,45132,54102,55462,56398,56904,60670,61182,64651,65886,68490,69582,71859,72436,73472,76714,77270,78257,78551,79324,
chr1	32541731	32568544	TCONS_00001501_add	0	+	32541731	32568544	255,0,0	7	124,84,155,337,188,121,513,	0,632,1033,15544,18653,24311,26300,
chr1	183442475	183528891	TCONS_00001507	0	+	183442475	183528891	255,0,0	24	54,137,139,32,118,133,172,72,151,136,163,157,71,61,120,289,145,383,372,81,160,171,146,7939,	0,27790,28912,39496,42533,44347,53255,54615,55551,56057,59823,60335,63804,65039,67643,68735,71012,71589,72625,75867,76423,77410,77704,78477,
chr1	183774283	183899656	TCONS_00001515	0	+	183774283	183899656	255,0,0	19	175,111,209,78,185,125,216,104,85,90,87,33,122,90,187,255,115,2450,987,	0,1225,42416,60846,75466,78636,79573,83324,86927,92658,95000,97418,99700,101862,106932,111297,117072,120955,124386,
chr1	184020750	184043346	TCONS_00001517	0	+	184020750	184043346	255,0,0	5	274,82,136,142,1386,	0,2737,3111,20540,21210,
chr1	184020850	184043346	TCONS_00001518	0	+	184020850	184043346	255,0,0	4	174,82,136,1386,	0,2637,3011,21110,
chr1	185014588	185072063	TCONS_00001520	0	+	185014588	185072063	255,0,0	7	193,89,161,216,273,172,2732,	0,42095,46122,47604,52615,54334,54743,
chr1	185126671	185261290	TCONS_00001525	0	+	185126671	185261290	255,0,0	19	87,93,81,59,742,60,112,102,189,94,146,164,139,149,188,132,67,65,1485,	0,3293,9032,10800,16832,22851,24406,26703,27203,33009,45114,47160,49085,56967,64309,74037,113783,119064,133134,
chr1	185129375	185261290	TCONS_00001526	0	+	185129375	185261290	255,0,0	19	94,93,81,59,742,60,112,102,189,94,146,164,139,149,188,132,67,65,1485,	0,589,6328,8096,14128,20147,21702,23999,24499,30305,42410,44456,46381,54263,61605,71333,111079,116360,130430,
chr1	185135049	185261290	TCONS_00001527	0	+	185135049	185261290	255,0,0	18	268,81,59,742,60,112,102,189,94,146,164,139,149,188,132,67,65,1485,	0,654,2422,8454,14473,16028,18325,18825,24631,36736,38782,40707,48589,55931,65659,105405,110686,124756,
chr1	185135157	185142149	TCONS_00001528	0	+	185135157	185142149	255,0,0	4	160,81,59,3218,	0,546,2314,3774,
chr1	186344010	186390501	TCONS_00001529	0	+	186344010	186390501	255,0,0	14	1096,118,135,96,107,37,141,96,69,129,91,186,111,2361,	0,4888,8143,11109,13563,14709,15832,16817,19068,23434,24075,31204,42665,44130,
chr1	186798093	186959054	TCONS_00001531	0	+	186798093	186959054	255,0,0	18	74,102,82,149,114,38,142,137,223,115,138,93,72,243,185,196,158,1546,	0,25324,41473,64049,65136,78003,82286,103801,110046,111018,117675,117907,121695,127140,136447,148631,150353,159415,
chr1	192533135	192549152	TCONS_00001535	0	+	192533135	192549152	255,0,0	6	35,290,81,62,164,886,	0,11634,12279,12768,14216,15131,
chr1	192778098	192781406	TCONS_00001537	0	+	192778098	192781406	255,0,0	5	213,102,62,167,875,	0,1197,1401,2012,2433,
chr1	193091160	193224905	TCONS_00001539	0	+	193091160	193224905	255,0,0	17	301,106,70,63,53,89,217,99,79,65,58,36,88,162,101,142,5100,	0,3081,8143,13360,13506,16054,19819,25836,28273,30349,81764,90034,90359,110962,114225,127699,128645,
chr1	196621152	196716751	TCONS_00001540	0	+	196621152	196716751	255,0,0	22	153,186,106,77,192,171,174,195,177,183,177,177,183,180,177,183,186,174,177,177,183,511,	0,20955,21834,23966,25453,27600,33041,37397,38040,61712,63570,73098,74447,74738,76323,84801,85452,88596,89852,91429,93794,95088,
chr1	196621153	196671265	TCONS_00001541	0	+	196621153	196671265	255,0,0	10	152,186,106,77,192,171,174,195,177,818,	0,20954,21833,23965,25452,27599,33040,37396,38039,49294,
chr1	198126106	198291548	TCONS_00001545	0	+	198126106	198291548	255,0,0	10	300,85,141,63,111,109,108,95,114,3007,	0,75576,96063,105598,107148,120984,121977,135968,140150,162435,
chr1	198190814	198291548	TCONS_00001549	0	+	198190814	198291548	255,0,0	10	38,85,141,63,111,109,108,95,114,3007,	0,10868,31355,40890,42440,56276,57269,71260,75442,97727,
chr1	198608097	198728462	TCONS_00001550	0	+	198608097	198728462	255,0,0	30	170,116,27,75,27,219,129,138,120,159,209,61,109,35,110,91,77,37,98,126,158,136,150,91,134,135,123,179,136,3428,	0,258,53378,64329,65503,67765,69164,70718,73984,77713,79125,83447,89371,90168,92648,93331,93511,95227,95359,96158,102900,103263,105085,109140,110447,111523,113280,113625,115300,116937,
chr1	198608155	198728462	TCONS_00001551	0	+	198608155	198728462	255,0,0	31	112,116,27,141,75,27,219,129,138,120,159,209,61,109,35,110,91,77,37,98,126,158,136,150,91,134,135,123,179,136,3428,	0,200,53320,60537,64271,65445,67707,69106,70660,73926,77655,79067,83389,89313,90110,92590,93273,93453,95169,95301,96100,102842,103205,105027,109082,110389,111465,113222,113567,115242,116879,
chr1	200708045	200830033	TCONS_00001556	0	+	200708045	200830033	255,0,0	17	1049,260,162,84,142,140,94,88,83,70,2203,137,221,73,116,119,3152,	0,21921,68458,76643,93282,93788,103076,105864,108292,108722,109114,113623,114357,115899,117092,118388,118836,
chr1	200708783	200830033	TCONS_00001557	0	+	200708783	200830033	255,0,0	17	311,260,162,84,142,140,94,88,35,70,2203,137,221,73,116,119,3152,	0,21183,67720,75905,92544,93050,102338,105126,107602,107984,108376,112885,113619,115161,116354,117650,118098,
chr1	201924641	201939587	TCONS_00001560	0	+	201924641	201939587	255,0,0	6	39,100,64,129,111,991,	0,1767,1997,8102,9919,13955,
chr1	201951744	201975307	TCONS_00001561	0	+	201951744	201975307	255,0,0	11	497,141,149,117,236,114,113,109,225,143,622,	0,6287,6766,13530,14702,17285,18759,19042,20620,21737,22941,
chr1	201952906	201975307	TCONS_00001563	0	+	201952906	201975307	255,0,0	11	106,141,149,117,236,114,113,109,225,143,622,	0,5125,5604,12368,13540,16123,17597,17880,19458,20575,21779,
chr1	201953670	201975307	TCONS_00001564	0	+	201953670	201975307	255,0,0	11	102,141,149,117,236,114,113,109,225,143,622,	0,4361,4840,11604,12776,15359,16833,17116,18694,19811,21015,
chr1	202976502	202990077	TCONS_00001568	0	+	202976502	202990077	255,0,0	8	200,90,168,160,181,164,81,157,	0,399,1268,7514,8585,10381,11106,13418,
chr1	202976513	202987927	TCONS_00001569	0	+	202976513	202987927	255,0,0	6	189,90,168,160,181,319,	0,388,1257,7503,8574,11095,
chr1	202976517	202994196	TCONS_00001570	0	+	202976517	202994196	255,0,0	9	185,90,168,160,181,164,81,156,2214,	0,384,1253,7499,8570,10366,11091,13403,15465,
chr1	203274595	203278844	TCONS_00001572	0	+	203274595	203278844	255,0,0	2	281,2613,	0,1636,
chr1	203595721	203713202	TCONS_00001574	0	+	203595721	203713202	255,0,0	21	626,657,198,258,126,126,36,162,215,243,242,232,180,88,107,192,214,212,108,177,4529,	0,56148,71563,72866,73612,74204,75450,77058,80415,81268,82707,84283,85366,86571,87577,93955,94603,95884,97287,100801,112952,
chr1	203764693	203823745	TCONS_00001577	0	+	203764693	203823745	255,0,0	20	229,204,54,60,199,120,124,204,117,81,111,63,99,69,504,77,316,167,68,2477,	0,727,6009,7391,21360,23004,32733,33885,34214,34557,36095,38225,42400,44740,51618,52765,54145,54949,55491,56575,
chr1	203764724	203823745	TCONS_00001579	0	+	203764724	203823745	255,0,0	18	179,1442,199,120,124,204,117,81,111,63,99,69,504,77,316,167,68,2477,	0,5978,21329,22973,32702,33854,34183,34526,36064,38194,42369,44709,51587,52734,54114,54918,55460,56544,
chr1	203764725	203823745	TCONS_00001580	0	+	203764725	203823745	255,0,0	19	197,54,365,199,120,124,204,117,81,111,63,99,69,504,77,316,167,68,2477,	0,5977,7054,21328,22972,32701,33853,34182,34525,36063,38193,42368,44708,51586,52733,54113,54917,55459,56543,
chr1	203764729	203823745	TCONS_00001582	0	+	203764729	203823745	255,0,0	18	174,6724,199,120,124,204,117,81,111,63,99,69,504,77,316,167,68,2477,	0,691,21324,22968,32697,33849,34178,34521,36059,38189,42364,44704,51582,52729,54109,54913,55455,56539,
chr1	203764781	203823745	TCONS_00001583	0	+	203764781	203823745	255,0,0	19	141,54,60,199,120,124,204,117,81,111,63,99,69,504,77,316,167,68,2477,	0,5921,7303,21272,22916,32645,33797,34126,34469,36007,38137,42312,44652,51530,52677,54057,54861,55403,56487,
chr1	203765165	203823745	TCONS_00001585	0	+	203765165	203823745	255,0,0	18	459,1442,199,120,124,204,117,81,111,63,99,69,504,77,316,167,68,2477,	0,5537,20888,22532,32261,33413,33742,34085,35623,37753,41928,44268,51146,52293,53673,54477,55019,56103,
chr1	203830741	203839407	TCONS_00001587	0	+	203830741	203839407	255,0,0	5	100,27,63,79,403,	0,582,2049,3427,8263,
chr1	205197337	205242676	TCONS_00001588	0	+	205197337	205242676	255,0,0	5	562,540,935,136,1736,	0,13295,40740,42910,43603,
chr1	205198780	205242676	TCONS_00001589	0	+	205198780	205242676	255,0,0	5	517,540,935,136,1736,	0,11852,39297,41467,42160,
chr1	206137213	206155133	TCONS_00001591	0	+	206137213	206155133	255,0,0	4	273,78,125,1177,	0,4232,8240,16743,
chr1	206137227	206138179	TCONS_00001592	0	+	206137227	206138179	255,0,0	2	259,408,	0,544,
chr1	206514214	206583327	TCONS_00001600	0	+	206514214	206583327	255,0,0	8	55,163,63,216,129,225,102,3592,	0,1985,43154,51831,52687,60565,64393,65521,
chr1	206514214	206637795	TCONS_00001604	0	+	206514214	206637795	255,0,0	21	55,163,63,216,129,222,102,198,85,28,25,61,78,135,106,225,80,181,147,325,3414,	0,1985,43154,51831,52687,60568,64393,65521,75034,78510,80386,89297,96100,97099,99111,105206,109516,112331,114009,117754,120167,
chr1	206514219	206629517	TCONS_00001607	0	+	206514219	206629517	255,0,0	19	50,163,63,216,129,225,102,198,85,28,25,61,78,135,106,225,80,181,2028,	0,1980,43149,51826,52682,60560,64388,65516,75029,78505,80381,89292,96095,97094,99106,105201,109511,112326,113270,
chr1	206516199	206629517	TCONS_00001641	0	+	206516199	206629517	255,0,0	19	163,43,63,216,129,222,102,198,85,28,25,61,78,135,106,225,80,181,1294,	0,25558,41169,49846,50702,58583,62408,63536,73049,76525,78401,87312,94115,95114,97126,103221,107531,110346,112024,
chr1	206643803	206670651	TCONS_00001645	0	+	206643803	206670651	255,0,0	22	238,90,119,141,130,182,161,111,180,191,65,92,87,76,113,77,40,102,97,113,72,1207,	0,695,2735,3870,4404,5720,6217,7288,7699,8482,9409,9561,9986,14530,14727,17447,20348,21177,22552,22795,23449,25641,
chr1	206730627	206762930	TCONS_00001653	0	+	206730627	206762930	255,0,0	5	394,111,298,116,2773,	0,25973,27091,27884,29530,
chr1	206858379	206907595	TCONS_00001654	0	+	206858379	206907595	255,0,0	10	474,140,65,80,127,76,125,86,81,1676,	0,43675,44000,44361,44937,45653,46103,46605,46804,47540,
chr1	207494869	207534578	TCONS_00001656	0	+	207494869	207534578	255,0,0	10	341,186,192,100,86,189,126,81,21,1688,	0,857,3034,4097,5227,9583,15168,15804,17872,38021,
chr1	207495725	207534578	TCONS_00001657	0	+	207495725	207534578	255,0,0	9	187,192,100,86,189,126,81,21,1688,	0,2178,3241,4371,8727,14312,14948,17016,37165,
chr1	207669514	207815121	TCONS_00001658	0	+	207669514	207815121	255,0,0	47	219,180,100,86,399,177,103,86,219,180,100,86,399,177,103,86,219,180,100,86,399,177,103,86,219,180,100,86,399,177,103,86,228,180,100,86,399,177,103,86,228,177,186,24,76,105,2380,	0,9734,10544,15399,27441,30583,30851,32546,36010,37239,38027,43811,46012,49138,49406,51101,54565,55794,56582,62368,64569,67694,67962,69668,71654,72889,73677,79425,81635,84070,84341,85748,88479,91216,92505,111081,113120,115507,115769,118234,120405,121901,123710,125803,126823,134347,143227,
chr1	207718651	207815121	TCONS_00001659	0	+	207718651	207815121	255,0,0	34	178,103,86,219,180,100,86,399,177,103,86,219,180,100,86,399,177,103,86,228,180,100,86,399,177,103,86,228,177,186,24,76,105,2380,	0,269,1964,5428,6657,7445,13231,15432,18557,18825,20531,22517,23752,24540,30288,32498,34933,35204,36611,39342,42079,43368,61944,63983,66370,66632,69097,71268,72764,74573,76666,77686,85210,94090,
chr1	207737206	207815121	TCONS_00001661	0	+	207737206	207815121	255,0,0	26	179,103,86,219,180,100,86,399,177,103,86,228,180,100,86,399,177,103,86,228,177,186,24,76,105,2380,	0,270,1976,3962,5197,5985,11733,13943,16378,16649,18056,20787,23524,24813,43389,45428,47815,48077,50542,52713,54209,56018,58111,59131,66655,75535,
chr1	207925400	207968965	TCONS_00001664	0	+	207925400	207968965	255,0,0	12	254,189,103,86,198,183,45,42,39,36,64,2102,	0,4958,5484,7583,9193,14957,15723,18265,31236,33015,33563,41463,
chr1	207925406	207968965	TCONS_00001665	0	+	207925406	207968965	255,0,0	11	248,189,103,86,198,183,42,39,36,64,2102,	0,4952,5478,7577,9187,14951,18259,31230,33009,33557,41457,
chr1	207925407	207968965	TCONS_00001666	0	+	207925407	207968965	255,0,0	13	247,189,103,86,198,183,45,42,39,36,64,93,2102,	0,4951,5477,7576,9186,14950,15716,18258,31229,33008,33556,38190,41456,
chr1	207930357	207968965	TCONS_00001669	0	+	207930357	207968965	255,0,0	11	190,103,86,198,183,45,42,39,36,64,2102,	0,527,2626,4236,10000,10766,13308,26279,28058,28606,36506,
chr1	209780986	209787272	TCONS_00001673	0	+	209780986	209787272	255,0,0	7	292,113,79,88,425,128,888,	0,1338,2209,3823,4150,5143,5398,
chr1	209782796	209787272	TCONS_00001674	0	+	209782796	209787272	255,0,0	5	478,88,425,128,888,	0,2013,2340,3333,3588,
chr1	209878173	209908958	TCONS_00001675	0	+	209878173	209908958	255,0,0	6	202,131,112,186,144,1310,	0,982,1880,2114,27607,29475,
chr1	209929370	209957051	TCONS_00001676	0	+	209929370	209957051	255,0,0	17	284,101,403,148,58,25,30,96,72,141,138,136,63,60,137,114,1651,	0,3008,3956,6489,6787,7042,7337,7466,16922,19323,19573,21326,22085,23289,24444,25319,26030,
chr1	209929394	209955334	TCONS_00001677	0	+	209929394	209955334	255,0,0	15	260,101,403,148,58,25,30,96,72,141,138,136,63,1292,645,	0,2984,3932,6465,6763,7018,7313,7442,16898,19299,19549,21302,22061,23265,25295,
chr1	212209115	212278315	TCONS_00001684	0	+	212209115	212278315	255,0,0	15	169,126,99,62,121,66,113,74,104,105,113,90,136,833,2132,	0,7219,8886,11377,11523,27110,29143,31038,32450,32825,36327,42399,44841,64478,67068,
chr1	212458446	212535202	TCONS_00001685	0	+	212458446	212535202	255,0,0	13	1187,197,102,93,131,60,109,54,51,120,128,102,1223,	0,44030,48392,57083,60698,62242,63284,64084,71521,71845,72052,73581,75533,
chr1	212606321	212619719	TCONS_00001687	0	+	212606321	212619719	255,0,0	4	141,61,104,548,	0,9585,11359,12850,
chr1	212738731	212794135	TCONS_00001690	0	+	212738731	212794135	255,0,0	4	94,244,108,1436,	0,49628,52737,53968,
chr1	212781906	212794135	TCONS_00001692	0	+	212781906	212794135	255,0,0	4	366,244,108,1436,	0,6453,9562,10793,
chr1	212964871	212990460	TCONS_00001694	0	+	212964871	212990460	255,0,0	10	458,33,74,85,63,110,56,113,78,2106,	0,3565,4987,5582,11171,12790,13066,16206,20721,23483,
chr1	212964871	212990460	TCONS_00001695	0	+	212964871	212990460	255,0,0	10	458,33,74,85,63,110,56,113,81,2106,	0,3565,4987,5582,11171,12790,13066,16206,20718,23483,
chr1	213224612	213448540	TCONS_00001697	0	+	213224612	213448540	255,0,0	14	239,36,121,116,94,363,116,48,133,1596,90,83,96,2674,	0,19735,26425,53183,66046,78257,116588,179227,180853,189432,191299,210288,211451,221254,
chr1	213224634	213448540	TCONS_00001699	0	+	213224634	213448540	255,0,0	15	217,36,121,116,94,363,116,93,48,133,1596,90,83,96,2674,	0,19713,26403,53161,66024,78235,116566,125108,179205,180831,189410,191277,210266,211429,221232,
chr1	213224640	213448540	TCONS_00001700	0	+	213224640	213448540	255,0,0	18	211,36,121,116,94,46,121,78,363,116,93,48,133,1596,90,83,96,2674,	0,19707,26397,53155,66018,71784,73356,74468,78229,116560,125102,179199,180825,189404,191271,210260,211423,221226,
chr1	213243961	213448540	TCONS_00001702	0	+	213243961	213448540	255,0,0	15	82,36,121,116,94,363,116,93,48,133,1596,90,83,96,2674,	0,386,7076,33834,46697,58908,97239,105781,159878,161504,170083,171950,190939,192102,201905,
chr1	213243997	213448540	TCONS_00001703	0	+	213243997	213448540	255,0,0	15	46,36,121,116,94,363,116,93,48,133,297,90,83,96,2674,	0,350,7040,33798,46661,58872,97203,105745,159842,161468,170047,171914,190903,192066,201869,
chr1	36347806	36396095	TCONS_00001703_add	0	+	36347806	36396095	255,0,0	19	23,184,121,182,137,135,88,148,120,123,134,185,160,91,195,135,102,200,10996,	0,6221,10351,10891,11468,11831,12109,12916,19268,19742,19998,24729,31636,31978,33142,35387,36116,36849,37293,
chr1	214454466	214510579	TCONS_00001704	0	+	214454466	214510579	255,0,0	12	304,64,111,61,125,68,103,111,121,175,109,533,	0,24063,33638,36955,37735,43517,46498,49044,49826,50894,53076,55580,
chr1	36348864	36396095	TCONS_00001704_add	0	+	36348864	36396095	255,0,0	19	183,184,121,182,137,135,88,148,120,123,134,185,160,91,195,135,102,200,10996,	0,5163,9293,9833,10410,10773,11051,11858,18210,18684,18940,23671,30578,30920,32084,34329,35058,35791,36235,
chr1	214776514	214837977	TCONS_00001705	0	+	214776514	214837977	255,0,0	20	150,203,197,122,92,292,203,126,129,123,136,3404,2844,153,177,162,163,477,179,1044,	0,10542,11660,15401,15957,17483,18907,25874,27362,29308,34694,36749,41385,45503,48538,49656,52069,53761,55678,60419,
chr1	36348978	36383581	TCONS_00001706_add	0	+	36348978	36383581	255,0,0	17	69,184,121,182,137,135,88,148,120,123,134,185,160,91,195,135,34,	0,5049,9179,9719,10296,10659,10937,11744,18096,18570,18826,23557,30464,30806,31970,34215,34569,
chr1	218458591	218505249	TCONS_00001707	0	+	218458591	218505249	255,0,0	5	206,266,98,202,960,	0,17044,19778,22181,45698,
chr1	218475624	218505249	TCONS_00001708	0	+	218475624	218505249	255,0,0	4	277,98,202,960,	0,2745,5148,28665,
chr1	220267477	220324791	TCONS_00001712	0	+	220267477	220324791	255,0,0	23	348,123,160,149,50,110,91,116,170,91,152,161,103,94,109,103,126,132,107,146,191,145,3957,	0,1968,6354,7993,8227,8359,8551,9311,11755,12925,16650,20178,31101,32614,40266,42673,43782,44872,46047,47667,48808,51373,53357,
chr1	220863646	220872492	TCONS_00001713	0	+	220863646	220872492	255,0,0	2	407,2539,	0,6307,
chr1	221051699	221058399	TCONS_00001715	0	+	221051699	221058399	255,0,0	4	2092,180,185,863,	0,2836,3806,5837,
chr1	221054065	221058399	TCONS_00001717	0	+	221054065	221058399	255,0,0	2	1625,863,	0,3471,
chr1	222791436	222843594	TCONS_00001718	0	+	222791436	222843594	255,0,0	28	149,134,87,2815,162,146,132,22,89,78,111,72,105,123,112,56,91,139,102,61,36,68,101,138,69,80,151,4944,	0,3064,6673,9480,14070,15009,27459,30734,32197,32539,32698,33882,34133,34913,35133,36148,36294,36560,40627,41358,41527,41639,41811,42082,43961,44158,45903,47214,
chr1	222817665	222843594	TCONS_00001722	0	+	222817665	222843594	255,0,0	24	263,132,22,89,78,111,72,105,123,112,56,91,139,102,61,36,68,101,138,69,80,151,4679,120,	0,1230,4505,5968,6310,6469,7653,7904,8684,8904,9919,10065,10331,14398,15129,15298,15410,15582,15853,17732,17929,19674,20985,25809,
chr1	222817673	222838334	TCONS_00001723	0	+	222817673	222838334	255,0,0	24	410,132,22,89,78,111,72,105,123,112,56,91,139,102,61,36,68,101,138,69,80,144,151,110,	0,1222,4497,5960,6302,6461,7645,7896,8676,8896,9911,10057,10323,14390,15121,15290,15402,15574,15845,17724,17921,18556,19666,20551,
chr1	222884724	222908773	TCONS_00001724	0	+	222884724	222908773	255,0,0	13	1560,117,107,97,96,73,106,90,86,82,151,160,2804,	0,4301,7542,7880,11036,12709,14067,15785,17360,18237,18644,19974,21245,
chr1	222885886	222908773	TCONS_00001725	0	+	222885886	222908773	255,0,0	13	872,117,107,97,96,73,106,90,86,82,151,160,2804,	0,3139,6380,6718,9874,11547,12905,14623,16198,17075,17482,18812,20083,
chr1	223900275	223965217	TCONS_00001726	0	+	223900275	223965217	255,0,0	21	304,70,119,134,169,84,86,75,161,170,12,212,37,66,58,65,69,79,117,59,2682,	0,5188,31526,32732,34423,36465,38316,39423,40222,42906,44795,46696,49007,49612,51576,53793,57267,57873,59235,59607,62260,
chr1	36396787	36522406	TCONS_00001727_add	0	+	36396787	36522406	255,0,0	21	259,172,121,209,137,92,79,135,88,148,120,123,134,185,160,91,195,135,102,200,1169,	0,14505,35768,40837,42188,51434,53283,73154,77503,77710,78288,82443,82728,95927,102987,104990,108603,109120,112260,123759,124450,
chr1	224370913	224381238	TCONS_00001728	0	+	224370913	224381238	255,0,0	3	207,743,1205,	0,6365,9120,
chr1	224803751	224928696	TCONS_00001730	0	+	224803751	224928696	255,0,0	6	1206,69,48,113,144,1666,	0,64908,68746,114412,118513,123279,
chr1	225965432	225978209	TCONS_00001732	0	+	225965432	225978209	255,0,0	3	282,69,1268,	0,5569,11509,
chr1	225965484	225978209	TCONS_00001733	0	+	225965484	225978209	255,0,0	4	230,69,124,1268,	0,5517,9079,11457,
chr1	225997788	226035527	TCONS_00001744	0	+	225997788	226035527	255,0,0	10	83,188,181,228,130,209,109,126,1826,783,	0,18637,21691,28566,29129,29741,32278,34410,35058,36956,
chr1	36397022	36538580	TCONS_00001744_add	0	+	36397022	36538580	255,0,0	20	24,172,121,209,137,135,88,148,120,123,134,185,160,91,195,135,102,200,238,44,	0,14270,35533,40602,41953,72919,77268,77475,78053,82208,82493,95692,102752,104755,108368,108885,112025,123524,124215,141514,
chr1	36468080	36489062	TCONS_00001748_add	0	+	36468080	36489062	255,0,0	2	1996,14772,	0,6210,
chr1	226249748	226259774	TCONS_00001750	0	+	226249748	226259774	255,0,0	5	47,77,151,154,723,	0,687,2281,3608,9303,
chr1	227058267	227085264	TCONS_00001762	0	+	227058267	227085264	255,0,0	13	83,143,186,161,215,142,68,221,99,84,102,119,2140,	0,695,4798,11321,13138,14971,17524,18262,19468,20711,21176,23440,24857,
chr1	227058275	227085264	TCONS_00001763	0	+	227058275	227085264	255,0,0	13	75,143,186,161,215,142,68,221,99,84,99,119,2140,	0,687,4790,11313,13130,14963,17516,18254,19460,20703,21171,23432,24849,
chr1	227105324	227175242	TCONS_00001766	0	+	227105324	227175242	255,0,0	15	37,186,411,67,75,123,86,141,82,94,142,108,66,87,1089,	0,43753,47376,48047,59825,64403,65054,65270,65928,66137,66470,66924,67252,67630,68829,
chr1	227125878	227175242	TCONS_00001768	0	+	227125878	227175242	255,0,0	16	145,276,186,411,67,75,123,86,141,82,94,142,108,66,87,1089,	0,1138,23199,26822,27493,39271,43849,44500,44716,45374,45583,45916,46370,46698,47076,48275,
chr1	227127848	227175242	TCONS_00001770	0	+	227127848	227175242	255,0,0	15	252,186,411,67,75,123,86,141,82,94,142,108,66,87,1089,	0,21229,24852,25523,37301,41879,42530,42746,43404,43613,43946,44400,44728,45106,46305,
chr1	228270373	228286905	TCONS_00001777	0	+	228270373	228286905	255,0,0	5	93,185,111,125,1353,	0,14405,14669,14918,15179,
chr1	228328012	228336749	TCONS_00001783	0	+	228328012	228336749	255,0,0	8	52,114,42,97,139,85,86,384,	0,5199,5714,6530,7094,7303,8059,8353,
chr1	228675474	228685347	TCONS_00001787	0	+	228675474	228685347	255,0,0	4	105,93,222,3764,	0,1186,5279,6109,
chr1	228871131	228882404	TCONS_00001789	0	+	228871131	228882404	255,0,0	3	620,59,3373,	0,2288,7900,
chr1	229406879	229441575	TCONS_00001790	0	+	229406879	229441575	255,0,0	8	238,81,115,63,155,96,128,2023,	0,15353,17596,24715,26349,27844,31729,32673,
chr1	230202955	230417856	TCONS_00001791	0	+	230202955	230417856	255,0,0	16	198,94,154,99,68,66,122,88,88,104,127,93,84,127,120,2808,	0,111008,135927,168804,169143,169450,176096,178853,181974,183247,188008,195363,195712,198031,207235,212093,
chr1	230778183	230829727	TCONS_00001792	0	+	230778183	230829727	255,0,0	18	241,162,66,81,104,109,180,125,127,140,62,152,198,73,143,140,181,690,	0,17026,18320,20703,22046,26238,26918,29078,32560,36475,41136,42647,44497,45633,45982,47576,48946,50854,
chr1	231114860	231136463	TCONS_00001793	0	+	231114860	231136463	255,0,0	6	165,120,154,225,147,580,	0,9205,10995,16645,18006,21023,
chr1	231376768	231413668	TCONS_00001794	0	+	231376768	231413668	255,0,0	16	434,183,177,130,128,76,152,131,224,243,80,141,100,94,62,424,	0,9938,19484,21700,24270,24689,24991,25254,26657,29735,31289,32899,34198,34382,35112,36476,
chr1	231663685	231702307	TCONS_00001795	0	+	231663685	231702307	255,0,0	6	887,105,115,131,128,2034,	0,1315,9273,14541,33188,36588,
chr1	231762441	232176992	TCONS_00001796	0	+	231762441	232176992	255,0,0	13	239,980,70,151,130,236,55,103,189,61,265,120,4553,	0,67130,75259,123230,140444,144139,168546,173412,191633,332132,382089,399739,409998,
chr1	231829576	232176992	TCONS_00001797	0	+	231829576	232176992	255,0,0	12	975,70,151,130,236,55,103,189,61,199,120,4553,	0,8124,56095,73309,77004,101411,106277,124498,264997,314954,332604,342863,
chr1	234350029	234460258	TCONS_00001801	0	+	234350029	234460258	255,0,0	6	291,325,126,193,90,1505,	0,17133,102318,104467,105814,108724,
chr1	234367093	234460258	TCONS_00001802	0	+	234367093	234460258	255,0,0	6	394,220,126,193,90,1505,	0,77753,85254,87403,88750,91660,
chr1	234508087	234519790	TCONS_00001803	0	+	234508087	234519790	255,0,0	3	1337,160,322,	0,1888,11381,
chr1	234509214	234519790	TCONS_00001804	0	+	234509214	234519790	255,0,0	3	372,160,322,	0,761,10254,
chr1	235530623	235613668	TCONS_00001806	0	+	235530623	235613668	255,0,0	17	196,131,85,186,89,100,100,77,96,65,65,153,154,69,60,92,1684,	0,12710,34194,47124,52164,59831,63396,66895,68436,69077,69235,70013,71460,74505,75543,81040,81361,
chr1	236305919	236410534	TCONS_00001811	0	+	236305919	236410534	255,0,0	8	417,50,223,150,129,125,5361,21,	0,26086,35794,37259,41158,62506,65430,104594,
chr1	236557472	236648715	TCONS_00001815	0	+	236557472	236648715	255,0,0	6	333,59,40,59,46,3149,	0,15043,20087,33219,74058,88094,
chr1	236687189	236716412	TCONS_00001816	0	+	236687189	236716412	255,0,0	11	172,148,89,211,120,57,27,126,89,166,5101,	0,2078,13607,14989,16674,17764,18871,19025,19670,20860,24122,
chr1	236687211	236716412	TCONS_00001817	0	+	236687211	236716412	255,0,0	10	150,148,89,211,120,57,27,89,166,5101,	0,2056,13585,14967,16652,17742,18849,19648,20838,24100,
chr1	236849821	236885790	TCONS_00001818	0	+	236849821	236885790	255,0,0	5	278,115,120,87,217,	0,31336,32372,33583,35752,
chr1	236849823	236927872	TCONS_00001819	0	+	236849823	236927872	255,0,0	19	276,115,120,87,88,82,93,231,148,151,109,141,183,135,180,147,66,159,2112,	0,31334,32370,33581,39409,44709,50598,52778,56372,58102,61143,62600,64946,67423,68495,70962,73200,74491,75937,
chr1	236849862	236927872	TCONS_00001820	0	+	236849862	236927872	255,0,0	20	237,115,120,87,88,82,86,93,231,148,151,109,141,183,135,180,147,66,159,2112,	0,31295,32331,33542,39370,44670,49072,50559,52739,56333,58063,61104,62561,64907,67384,68456,70923,73161,74452,75898,
chr1	236849884	236885790	TCONS_00001823	0	+	236849884	236885790	255,0,0	5	215,115,120,87,328,	0,31273,32309,33520,35578,
chr1	236888980	236927872	TCONS_00001824	0	+	236888980	236927872	255,0,0	15	340,82,93,231,148,151,109,141,183,135,180,147,66,159,2112,	0,5552,11441,13621,17215,18945,21986,23443,25789,28266,29338,31805,34043,35334,36780,
chr1	241695163	241759037	TCONS_00001827	0	+	241695163	241759037	255,0,0	16	635,70,98,90,49,88,166,72,122,148,58,83,102,60,197,2372,	0,16965,17813,19091,23748,28801,30303,33123,34627,36636,54817,56886,58150,58342,60091,61502,
chr1	241714250	241731949	TCONS_00001829	0	+	241714250	241731949	255,0,0	6	94,49,88,166,122,150,	0,4661,9714,11216,15540,17549,
chr1	243419298	243481781	TCONS_00001832	0	+	243419298	243481781	255,0,0	10	244,153,86,114,126,129,65,189,139,443,	0,14108,14981,18546,30275,37094,48716,51992,60758,62040,
chr1	243419363	243664437	TCONS_00001833	0	+	243419363	243664437	255,0,0	19	179,153,86,114,126,129,96,65,189,139,153,135,117,143,128,109,132,127,1380,	0,14043,14916,18481,30210,37029,37337,48651,51927,60693,74478,84977,88153,122659,159640,161906,170365,232952,243694,
chr1	244816360	244872332	TCONS_00001835	0	+	244816360	244872332	255,0,0	5	297,73,94,142,3475,	0,33538,36190,38820,52497,
chr1	246887626	246931503	TCONS_00001839	0	+	246887626	246931503	255,0,0	12	288,113,81,130,50,131,118,120,57,112,82,1007,	0,2567,11650,15847,19751,33901,34709,35632,35846,39921,41733,42870,
chr1	247381703	247386433	TCONS_00001840	0	+	247381703	247386433	255,0,0	3	208,87,340,	0,378,4390,
chr1	247381713	247382188	TCONS_00001841	0	+	247381713	247382188	255,0,0	2	198,107,	0,368,
chr1	247385441	247386433	TCONS_00001844	0	+	247385441	247386433	255,0,0	2	103,340,	0,652,
chr1	247579225	247613201	TCONS_00001848	0	+	247579225	247613201	255,0,0	10	270,1025,120,1753,171,171,171,171,171,1495,	0,2129,7306,7923,13661,18179,20046,28048,28727,32481,
chr1	247579483	247613201	TCONS_00001849	0	+	247579483	247613201	255,0,0	11	12,238,321,120,1753,171,171,171,171,171,1495,	0,1871,2575,7048,7665,13403,17921,19788,27790,28469,32223,
chr1	247580327	247613201	TCONS_00001850	0	+	247580327	247613201	255,0,0	10	21,1025,120,1753,171,171,171,171,171,1495,	0,1027,6204,6821,12559,17077,18944,26946,27625,31379,
chr1	247711655	247740981	TCONS_00001852	0	+	247711655	247740981	255,0,0	6	25,176,60,50,29,3537,	0,691,8053,15236,17577,25789,
chr1	248020524	248043775	TCONS_00001854	0	+	248020524	248043775	255,0,0	6	444,96,231,23,101,4574,	0,3394,7482,10622,10740,18677,
chr1	249132057	249143926	TCONS_00001855	0	+	249132057	249143926	255,0,0	4	693,154,97,2676,	0,6624,7707,9193,
chr1	566135	568845	TCONS_00001856	0	-	566135	568845	255,0,0	2	2548,100,	0,2610,
chr1	879170	894647	TCONS_00001857	0	-	879170	894647	255,0,0	19	1010,90,136,114,144,102,114,112,140,189,114,111,79,91,121,132,175,153,53,	0,1266,1727,2382,2611,4340,4699,7336,8209,8621,9384,9991,10213,12132,12304,13103,13308,15138,15424,
chr1	930070	935356	TCONS_00001861	0	-	930070	935356	255,0,0	4	4742,81,96,111,	0,4842,5001,5175,
chr1	930070	935395	TCONS_00001862	0	-	930070	935395	255,0,0	3	4742,280,150,	0,4835,5175,
chr1	930070	935403	TCONS_00001863	0	-	930070	935403	255,0,0	3	4742,262,158,	0,4835,5175,
chr1	930070	936220	TCONS_00001864	0	-	930070	936220	255,0,0	2	4742,1315,	0,4835,
chr1	930070	936344	TCONS_00001865	0	-	930070	936344	255,0,0	3	4742,88,1273,	0,4835,5001,
chr1	1152232	1167420	TCONS_00001874	0	-	1152232	1167420	255,0,0	7	836,176,159,114,137,479,149,	0,1605,1916,6391,6979,11615,15039,
chr1	1188911	1208894	TCONS_00001875	0	-	1188911	1208894	255,0,0	7	1956,81,139,103,41,131,16,	0,2513,3460,3676,9814,14330,19967,
chr1	1188911	1209174	TCONS_00001876	0	-	1188911	1209174	255,0,0	7	1956,81,139,103,41,131,129,	0,2513,3460,3676,9814,14330,20134,
chr1	1227755	1243262	TCONS_00001877	0	-	1227755	1243262	255,0,0	24	1333,111,110,227,99,108,203,95,70,209,112,101,52,113,12,75,96,45,184,59,54,120,58,114,	0,1447,1714,2026,2342,3071,3360,3639,3835,4049,5446,5637,5994,6191,6969,7455,7597,7782,8133,9612,10546,10786,11710,15393,
chr1	1246708	1260479	TCONS_00001878	0	-	1246708	1260479	255,0,0	17	596,130,143,62,108,163,90,84,190,65,139,35,99,229,74,98,519,	0,689,897,1111,1264,1458,1706,2180,2403,2972,3495,4075,4191,7967,9127,9667,13252,
chr1	1309101	1312086	TCONS_00001882	0	-	1309101	1312086	255,0,0	5	181,446,86,237,139,	0,278,983,1432,2846,
chr1	1321017	1334670	TCONS_00001883	0	-	1321017	1334670	255,0,0	11	1945,93,112,142,105,2038,65,121,110,75,272,	0,2139,2316,4592,4821,5128,7758,9756,12595,12959,13381,
chr1	1321017	1334684	TCONS_00001884	0	-	1321017	1334684	255,0,0	11	1945,93,112,142,105,100,65,121,110,75,286,	0,2139,2316,4592,4821,5128,7758,9756,12595,12959,13381,
chr1	1334843	1342665	TCONS_00001885	0	-	1334843	1342665	255,0,0	5	766,1709,78,111,155,	0,1084,6345,7445,7667,
chr1	1477020	1510185	TCONS_00001888	0	-	1477020	1510185	255,0,0	5	527,119,140,144,328,	0,2228,3222,23132,32837,
chr1	1570656	1655796	TCONS_00001893	0	-	1570656	1655796	255,0,0	21	562,190,149,117,108,122,106,122,91,176,66,159,96,123,117,93,133,128,116,124,100,	0,642,1038,1387,1602,1786,2113,2467,3205,4981,5752,6366,6610,7090,9830,73090,77128,80110,82378,83490,85040,
chr1	1586817	1588950	TCONS_00001894	0	-	1586817	1588950	255,0,0	2	121,126,	0,2007,
chr1	1586817	1590530	TCONS_00001895	0	-	1586817	1590530	255,0,0	3	121,124,156,	0,2007,3557,
chr1	1592850	1624597	TCONS_00001897	0	-	1592850	1624597	255,0,0	9	4608,146,73,54,121,128,136,469,710,	0,6915,8252,8686,10097,14051,14652,14966,31037,
chr1	1633825	1655804	TCONS_00001899	0	-	1633825	1655804	255,0,0	20	613,190,149,117,108,122,106,122,91,60,66,159,96,123,137,133,128,116,124,108,	0,693,1089,1437,1652,1836,2163,2517,3255,5138,5793,6407,6651,7131,9877,13959,16941,19209,20321,21871,
chr1	1633825	1656207	TCONS_00001902	0	-	1633825	1656207	255,0,0	21	613,190,149,117,108,122,106,122,91,176,66,159,96,123,137,133,128,116,124,87,33,	0,693,1089,1437,1652,1836,2163,2517,3255,5022,5793,6407,6651,7131,9877,13959,16941,19209,20321,21871,22349,
chr1	1635902	1655808	TCONS_00001904	0	-	1635902	1655808	255,0,0	14	192,122,91,176,66,159,96,123,137,133,98,116,124,112,	0,440,1178,2945,3716,4330,4574,5054,7800,11882,14894,17132,18244,19794,
chr1	1658771	1677549	TCONS_00001906	0	-	1658771	1677549	255,0,0	7	5191,146,128,136,469,418,387,	0,7357,10988,11589,11903,16918,18391,
chr1	1682512	1709823	TCONS_00001908	0	-	1682512	1709823	255,0,0	12	1987,83,158,100,155,103,86,105,131,84,219,96,	0,2493,2977,3210,3470,4300,5184,5429,6106,10878,14154,27215,
chr1	1682512	1713220	TCONS_00001914	0	-	1682512	1713220	255,0,0	13	1987,83,158,100,155,103,86,106,130,84,219,125,26,	0,2493,2977,3210,3470,4300,5184,5429,6107,10878,14154,28831,30682,
chr1	1716722	1811343	TCONS_00001918	0	-	1716722	1811343	255,0,0	13	1770,116,217,202,67,163,64,107,39,103,49,69,118,	0,2038,3769,5111,7961,19135,21191,30472,32553,40113,53906,63177,94503,
chr1	1716722	1821684	TCONS_00001922	0	-	1716722	1821684	255,0,0	12	1770,112,217,202,67,163,64,107,39,103,49,58,	0,2042,3769,5111,7961,19135,21191,30472,32553,40113,53906,104904,
chr1	2120609	2125715	TCONS_00001948	0	-	2120609	2125715	255,0,0	3	611,272,279,	0,4468,4827,
chr1	2120609	2126202	TCONS_00001949	0	-	2120609	2126202	255,0,0	4	611,272,136,76,	0,4468,4827,5517,
chr1	3696382	3712905	TCONS_00001954	0	-	3696382	3712905	255,0,0	7	1518,90,103,116,117,462,480,	0,1693,2842,4177,5268,7030,16043,
chr1	3805382	3816809	TCONS_00001957	0	-	3805382	3816809	255,0,0	4	1255,489,114,74,	0,1750,4064,11353,
chr1	6245082	6259818	TCONS_00001960	0	-	6245082	6259818	255,0,0	4	1794,125,105,197,	0,7907,12629,14539,
chr1	6252841	6259672	TCONS_00001961	0	-	6252841	6259672	255,0,0	3	273,105,51,	0,4870,6780,
chr1	6279310	6295037	TCONS_00001964	0	-	6279310	6295037	255,0,0	4	6012,218,170,92,	0,12651,14223,15635,
chr1	6279310	6295895	TCONS_00001966	0	-	6279310	6295895	255,0,0	5	6012,218,170,89,119,	0,12651,14223,15635,16466,
chr1	6279310	6295897	TCONS_00001967	0	-	6279310	6295897	255,0,0	6	6012,218,170,107,89,121,	0,12651,14223,15154,15635,16466,
chr1	6324329	6419740	TCONS_00001974	0	-	6324329	6419740	255,0,0	10	426,185,117,87,115,92,157,118,242,78,	0,16832,30594,54222,63029,69207,75163,85479,94556,95333,
chr1	6324329	6421047	TCONS_00001976	0	-	6324329	6421047	255,0,0	9	426,185,117,87,115,92,157,118,130,	0,16832,30594,54222,63029,69207,75163,85479,96588,
chr1	6692906	6761887	TCONS_00001979	0	-	6692906	6761887	255,0,0	16	2854,130,143,58,70,156,117,86,190,74,123,129,102,74,130,99,	0,3270,4351,4600,5448,7055,11711,12194,12942,18682,19982,21064,34862,45547,48061,68882,
chr1	7965831	8000943	TCONS_00001980	0	-	7965831	8000943	255,0,0	9	285,6384,135,131,67,138,108,184,100,	0,8768,27390,29241,31918,32421,32949,34123,35012,
chr1	7974407	8001035	TCONS_00001981	0	-	7974407	8001035	255,0,0	8	6576,135,131,67,138,108,184,192,	0,18814,20665,23342,23845,24373,25547,26436,
chr1	8071556	8082530	TCONS_00001982	0	-	8071556	8082530	255,0,0	4	2900,77,198,78,	0,3811,3998,10896,
chr1	8071556	8086357	TCONS_00001983	0	-	8071556	8086357	255,0,0	4	2900,77,198,140,	0,3811,3998,14661,
chr1	8412425	8483766	TCONS_00001984	0	-	8412425	8483766	255,0,0	13	2755,181,147,721,223,1379,114,162,200,93,163,81,146,	0,3053,3734,5830,7398,7746,9397,10317,11690,12380,13446,70361,71195,
chr1	8412425	8483782	TCONS_00001985	0	-	8412425	8483782	255,0,0	14	2755,181,147,721,223,1379,114,162,200,93,163,81,81,162,	0,3053,3734,5830,7398,7746,9397,10317,11690,12380,13446,70361,70801,71195,
chr1	8412425	8586095	TCONS_00001988	0	-	8412425	8586095	255,0,0	17	2755,181,147,721,223,1379,114,162,200,93,163,81,99,100,125,49,278,	0,3053,3734,5830,7398,7746,9397,10317,11690,12380,13446,70361,113559,142697,145039,156260,173392,
chr1	8412425	8762613	TCONS_00001989	0	-	8412425	8762613	255,0,0	23	2755,181,147,721,223,1379,114,162,200,93,163,81,99,100,125,49,105,97,106,126,71,469,41,	0,3053,3734,5830,7398,7746,9397,10317,11690,12380,13446,70361,113559,142697,145039,156260,188847,204108,205051,262194,271943,303606,350147,
chr1	8920988	8938827	TCONS_00001993	0	-	8920988	8938827	255,0,0	12	500,59,109,202,198,223,134,70,59,96,94,189,	0,1957,2305,2961,4355,5349,6187,7058,9522,10961,13894,17650,
chr1	9160317	9166639	TCONS_00001995	0	-	9160317	9166639	255,0,0	2	4376,1095,	0,5227,
chr1	9160317	9189099	TCONS_00001996	0	-	9160317	9189099	255,0,0	3	4376,214,396,	0,11017,28386,
chr1	9160317	9189187	TCONS_00001997	0	-	9160317	9189187	255,0,0	4	4376,195,214,484,	0,5227,11017,28386,
chr1	9786852	9883771	TCONS_00002000	0	-	9786852	9883771	255,0,0	17	3911,185,136,146,171,227,149,158,163,122,249,186,150,209,196,123,71,	0,4411,4966,6606,7177,8153,8672,9090,14299,17089,17600,22666,22969,24678,28319,46477,96848,
chr1	9786852	9970192	TCONS_00002002	0	-	9786852	9970192	255,0,0	20	3911,185,136,146,171,227,149,158,163,122,249,186,150,209,196,123,91,120,85,40,	0,4411,4966,6606,7177,8153,8672,9090,14299,17089,17600,22666,22969,24678,28319,46477,144392,145174,151110,183300,
chr1	9908340	9953653	TCONS_00002003	0	-	9908340	9953653	255,0,0	5	2494,91,120,85,587,	0,22904,23686,29622,44726,
chr1	11114570	11119979	TCONS_00002007	0	-	11114570	11119979	255,0,0	8	372,123,146,84,154,93,121,146,	0,448,1267,1497,2090,4286,4711,5263,
chr1	11119803	11159928	TCONS_00002008	0	-	11119803	11159928	255,0,0	26	30,220,77,62,172,74,85,75,96,107,79,51,112,51,149,157,191,144,111,76,115,166,105,124,137,151,	0,6782,8261,8898,9812,11153,12340,14187,14484,17095,17618,17854,19964,20752,21017,21335,22941,27701,28053,28376,30807,31267,31746,36011,38273,39974,
chr1	11166601	11190836	TCONS_00002009	0	-	11166601	11190836	255,0,0	20	956,106,81,81,66,136,75,73,83,123,148,136,175,135,183,123,99,97,101,251,	0,1636,2745,3104,6307,7773,8268,8851,10459,14701,15434,17953,20077,20465,21079,21459,21909,22310,23193,23984,
chr1	11166601	11322600	TCONS_00002012	0	-	11166601	11322600	255,0,0	58	956,106,81,81,66,136,75,73,83,123,148,136,175,135,183,123,99,97,101,249,118,116,132,126,108,78,116,101,140,76,146,163,143,147,93,163,113,168,87,251,130,135,93,90,123,206,216,245,129,187,109,276,135,201,233,109,203,99,	0,1636,2745,3104,6307,7773,8268,8851,10459,14701,15434,17953,20077,20465,21079,21459,21909,22310,23193,23984,26535,27806,32759,32988,38103,38423,40131,43581,50607,60897,92713,92996,98016,102767,104269,105767,106251,106854,109603,122123,124380,124755,125891,126853,127598,131298,131857,133758,135008,136569,141080,141274,147294,149447,150388,151940,152703,155900,
chr1	11166601	11322952	TCONS_00002013	0	-	11166601	11322952	255,0,0	58	956,106,81,81,66,136,75,73,83,123,148,136,175,135,183,123,99,97,101,249,118,116,132,126,108,78,116,101,140,76,146,163,143,147,93,163,113,168,87,251,130,135,93,90,123,206,216,245,129,187,109,276,135,201,233,109,176,114,	0,1636,2745,3104,6307,7773,8268,8851,10459,14701,15434,17953,20077,20465,21079,21459,21909,22310,23193,23984,26535,27806,32759,32988,38103,38423,40131,43581,50607,60897,92713,92996,98016,102767,104269,105767,106251,106854,109603,122123,124380,124755,125891,126853,127598,131298,131857,133758,135008,136569,141080,141274,147294,149447,150388,151940,152703,156237,
chr1	11733611	11740837	TCONS_00002015	0	-	11733611	11740837	255,0,0	8	1262,93,74,95,101,72,119,219,	0,1527,2103,2491,3293,3988,6798,7007,
chr1	11733611	11741297	TCONS_00002016	0	-	11733611	11741297	255,0,0	9	1262,93,74,95,101,72,119,52,202,	0,1527,2103,2491,3293,3988,6798,7007,7484,
chr1	11845782	11865455	TCONS_00002017	0	-	11845782	11865455	255,0,0	12	5173,120,102,183,181,135,251,194,111,239,249,52,	0,5481,6552,8181,8632,9003,9372,10480,14486,15435,17155,19621,
chr1	11845782	11866069	TCONS_00002018	0	-	11845782	11866069	255,0,0	11	5173,120,102,183,181,135,251,194,111,239,3132,	0,5481,6552,8181,8632,9003,9372,10480,14486,15435,17155,
chr1	11845782	11866136	TCONS_00002019	0	-	11845782	11866136	255,0,0	12	5173,120,102,183,181,135,251,194,111,239,249,192,	0,5481,6552,8181,8632,9003,9372,10480,14486,15435,17155,20162,
chr1	11979449	11986336	TCONS_00002021	0	-	11979449	11986336	255,0,0	3	940,854,1075,	0,3243,5812,
chr1	12627946	12677803	TCONS_00002022	0	-	12627946	12677803	255,0,0	6	507,126,239,120,144,645,	0,4809,10799,11374,12604,49212,
chr1	13216352	13219576	TCONS_00002024	0	-	13216352	13219576	255,0,0	2	897,577,	0,2647,
chr1	16539087	16543910	TCONS_00002027	0	-	16539087	16543910	255,0,0	3	47,1382,289,	0,2635,4534,
chr1	16573144	16678935	TCONS_00002029	0	-	16573144	16678935	255,0,0	10	5136,117,57,97,111,154,135,117,267,186,	0,5638,6446,6985,9061,9956,48133,59153,68519,105605,
chr1	43148001	43168130	TCONS_00002031_add	0	+	43148001	43168130	255,0,0	8	401,64,34,90,303,83,266,479,	0,1072,11159,13868,14311,14849,18450,19650,
chr1	16888841	16905451	TCONS_00002032	0	-	16888841	16905451	255,0,0	13	1840,112,173,52,173,52,164,52,206,73,215,103,77,	0,2460,3286,4061,4832,5632,6726,10795,12140,12810,13920,14970,16533,
chr1	43148107	43168130	TCONS_00002032_add	0	+	43148107	43168130	255,0,0	8	288,56,34,90,303,83,266,479,	0,974,11053,13762,14205,14743,18344,19544,
chr1	16888841	16940026	TCONS_00002034	0	-	16888841	16940026	255,0,0	28	1840,112,173,52,173,52,164,52,206,73,215,103,210,212,73,215,103,210,212,73,215,210,155,313,70,83,272,194,	0,2460,3286,4061,4832,5632,6726,10795,12140,12810,13920,14970,16846,18398,19073,20197,21247,23142,24703,25378,26502,29500,29812,31094,32245,32584,46161,50991,
chr1	16892902	16915681	TCONS_00002035	0	-	16892902	16915681	255,0,0	18	52,173,52,164,52,206,73,215,103,210,212,73,215,103,210,212,73,338,	0,771,1571,2665,6734,8079,8749,9859,10909,12785,14337,15012,16136,17186,19081,20642,21317,22441,
chr1	17215010	17216170	TCONS_00002038	0	-	17215010	17216170	255,0,0	2	270,128,	0,1032,
chr1	17312451	17332315	TCONS_00002039	0	-	17312451	17332315	255,0,0	28	402,170,152,224,97,153,80,117,161,125,121,160,96,207,189,47,111,156,132,67,135,70,78,80,130,59,183,137,	0,506,848,1089,2181,2365,3734,3930,4170,5777,6052,6286,6529,7672,10019,10297,10429,11063,14054,14289,14443,16077,16339,18375,18735,19057,19417,19727,
chr1	17312451	17338303	TCONS_00002041	0	-	17312451	17338303	255,0,0	29	402,170,152,224,97,153,80,117,161,125,121,160,96,207,189,47,111,156,132,67,135,70,78,77,130,59,183,95,80,	0,506,848,1089,2181,2365,3734,3930,4170,5777,6052,6286,6529,7672,10019,10297,10429,11063,14054,14289,14443,16077,16339,18375,18735,19057,19417,19727,25772,
chr1	17312451	17338314	TCONS_00002042	0	-	17312451	17338314	255,0,0	29	402,170,152,224,97,153,80,117,161,125,121,160,96,207,189,47,111,156,132,67,108,70,78,80,115,59,183,95,91,	0,506,848,1089,2181,2365,3734,3930,4170,5777,6052,6286,6529,7672,10019,10297,10429,11063,14054,14289,14443,16077,16339,18375,18750,19057,19417,19727,25772,
chr1	17312451	17338438	TCONS_00002043	0	-	17312451	17338438	255,0,0	29	402,170,152,224,97,153,80,117,161,125,121,160,96,207,189,47,111,156,132,67,135,70,78,80,115,59,183,95,215,	0,506,848,1089,2181,2365,3734,3930,4170,5777,6052,6286,6529,7672,10019,10297,10429,11063,14054,14289,14443,16077,16339,18375,18750,19057,19417,19727,25772,
chr1	17345213	17371892	TCONS_00002045	0	-	17345213	17371892	255,0,0	8	240,123,102,117,137,86,128,257,	0,3889,5254,9030,9881,14341,26042,26422,
chr1	17345213	17380673	TCONS_00002046	0	-	17345213	17380673	255,0,0	8	240,123,102,117,137,86,128,231,	0,3889,5254,9030,9881,14341,26042,35229,
chr1	17733261	17765050	TCONS_00002047	0	-	17733261	17765050	255,0,0	12	2429,78,73,106,181,167,115,89,132,144,94,325,	0,3208,5356,6307,6771,9714,13948,15437,15939,18775,22340,31464,
chr1	17733261	17766260	TCONS_00002048	0	-	17733261	17766260	255,0,0	13	2429,78,73,106,181,167,115,89,132,144,94,293,220,	0,3208,5356,6307,6771,9714,13948,15437,15939,18775,22340,31464,32779,
chr1	19197926	19229277	TCONS_00002049	0	-	19197926	19229277	255,0,0	15	1525,119,122,153,48,197,74,188,75,150,156,48,93,94,322,	0,3030,3949,4882,5775,5983,7867,10267,11691,11846,14040,15031,17929,18579,31029,
chr1	19230710	19282856	TCONS_00002050	0	-	19230710	19282856	255,0,0	9	4450,131,93,121,140,141,96,61,695,	0,6125,7167,7746,12686,14145,15461,16844,51451,
chr1	19400619	19536765	TCONS_00002051	0	-	19400619	19536765	255,0,0	106	771,163,91,225,195,126,143,114,219,100,174,191,120,108,128,88,81,198,122,174,82,142,110,158,130,128,85,91,344,129,126,139,240,194,88,86,145,169,246,79,228,150,210,117,108,97,175,132,105,178,131,112,122,141,175,135,64,217,217,164,202,172,158,228,153,159,183,171,231,148,71,192,64,189,199,101,102,210,158,98,122,230,126,183,129,80,136,283,170,86,160,188,118,138,100,191,60,125,125,142,103,140,130,104,…	0,2614,3850,7223,10378,12019,12553,13690,14633,18693,19187,19823,20780,21419,22397,23067,25471,26250,27394,29958,30459,30922,31607,32443,32711,35970,36254,36616,38398,39573,39819,40685,41272,43095,43697,44746,45431,46054,47063,47808,48707,50415,52320,53497,54085,54852,63881,64957,66662,67221,67521,69854,70660,71667,72700,73867,74437,76451,77517,78187,79175,79642,80792,81315,82145,82641,83689,8598…
chr1	19400619	19536817	TCONS_00002052	0	-	19400619	19536817	255,0,0	106	771,163,91,225,195,126,143,114,219,100,174,191,120,108,128,88,81,198,122,174,82,142,110,158,130,128,85,91,344,129,126,139,240,194,88,86,145,169,246,79,228,150,210,117,108,97,175,138,105,178,131,112,122,141,175,135,64,217,217,164,202,172,158,228,153,159,183,171,231,148,71,192,64,189,199,101,102,210,158,98,122,230,126,183,129,80,136,283,170,86,160,188,118,138,100,191,60,125,125,142,103,140,130,104,…	0,2614,3850,7223,10378,12019,12553,13690,14633,18693,19187,19823,20780,21419,22397,23067,25471,26250,27394,29958,30459,30922,31607,32443,32711,35970,36254,36616,38398,39573,39819,40685,41272,43095,43697,44746,45431,46054,47063,47808,48707,50415,52320,53497,54085,54852,63881,64957,66662,67221,67521,69854,70660,71667,72700,73867,74437,76451,77517,78187,79175,79642,80792,81315,82145,82641,83689,8598…
chr1	19540808	19578357	TCONS_00002053	0	-	19540808	19578357	255,0,0	23	5168,130,85,211,174,138,120,162,150,200,123,97,123,63,72,168,150,127,129,94,66,125,449,	0,5254,6449,8309,9081,12998,16529,16946,18309,18621,20815,22827,23702,24480,24916,25503,25982,26701,28030,29299,29635,30591,37100,
chr1	20825630	20834626	TCONS_00002056	0	-	20825630	20834626	255,0,0	4	2282,121,88,229,	0,2931,4084,8767,
chr1	20976956	20988841	TCONS_00002057	0	-	20976956	20988841	255,0,0	12	2065,107,121,148,149,94,95,104,87,111,645,25,	0,2157,2387,3163,3759,4150,4976,5212,5637,10417,10733,11860,
chr1	21068966	21113804	TCONS_00002064	0	-	21068966	21113804	255,0,0	13	2618,114,112,160,91,155,81,144,160,154,100,196,117,	0,3069,5070,7249,14692,22903,25110,28456,30977,34123,37338,37871,44721,
chr1	21132925	21416251	TCONS_00002067	0	-	21132925	21416251	255,0,0	33	1068,147,82,147,99,82,126,173,116,221,118,94,95,133,105,237,147,198,171,120,134,247,89,840,109,123,98,115,180,96,129,76,92,	0,4305,6725,10959,18667,21184,22714,34423,42982,44825,47127,48545,50970,53952,55795,58043,58683,72890,79768,87084,88935,93264,98450,135058,143570,163041,166569,173901,174615,196280,244433,282705,283234,
chr1	21132925	21416252	TCONS_00002068	0	-	21132925	21416252	255,0,0	33	1068,147,82,147,99,82,126,173,116,221,118,94,95,133,105,237,147,198,171,120,134,247,89,840,106,123,98,115,180,96,129,76,93,	0,4305,6725,10959,18667,21184,22714,34423,42982,44825,47127,48545,50970,53952,55795,58043,58683,72890,79768,87084,88935,93264,98450,135058,143570,163041,166569,173901,174615,196280,244433,282705,283234,
chr1	21132925	21437877	TCONS_00002069	0	-	21132925	21437877	255,0,0	33	1068,147,82,147,99,82,126,173,116,221,118,94,95,133,105,237,147,198,171,120,134,247,89,840,106,123,98,115,180,96,129,76,62,	0,4305,6725,10959,18667,21184,22714,34423,42982,44825,47127,48545,50970,53952,55795,58043,58683,72890,79768,87084,88935,93264,98450,135058,143570,163041,166569,173901,174615,196280,244433,282705,304890,
chr1	21132925	21503415	TCONS_00002074	0	-	21132925	21503415	255,0,0	35	1068,147,82,147,99,82,126,173,116,221,118,94,95,133,105,237,147,198,171,111,120,134,247,89,840,106,123,98,115,180,96,129,76,184,201,	0,4305,6725,10959,18667,21184,22714,34423,42982,44825,47127,48545,50970,53952,55795,58043,58683,72890,79768,86186,87084,88935,93264,98450,135058,143570,163041,166569,173901,174615,196280,244433,282705,369742,370289,
chr1	21543741	21616796	TCONS_00002080	0	-	21543741	21616796	255,0,0	18	2883,96,191,68,111,104,78,99,111,115,143,192,66,147,122,213,142,234,	0,4498,8001,9910,10682,16309,18601,19497,20885,27740,29972,38698,40276,41444,43022,55450,61942,72821,
chr1	21543741	21672027	TCONS_00002083	0	-	21543741	21672027	255,0,0	19	2883,96,191,68,111,104,78,99,111,115,143,192,66,147,122,213,142,87,159,	0,4498,8001,9910,10682,16309,18601,19497,20885,27740,29972,38698,40276,41444,43022,55450,61942,72821,128127,
chr1	21922714	21991817	TCONS_00002084	0	-	21922714	21991817	255,0,0	25	1043,43,104,103,124,114,110,132,138,87,72,156,130,101,84,54,79,104,186,39,48,36,94,36,114,	0,1464,1739,2178,3272,5462,6582,9844,11991,12628,13353,13898,15230,15494,15804,16954,17406,17764,21084,21712,22803,23793,30082,53539,68989,
chr1	21922714	21996422	TCONS_00002087	0	-	21922714	21996422	255,0,0	25	1043,43,104,103,124,114,110,132,138,87,72,156,130,101,84,54,79,104,186,39,48,36,94,36,676,	0,1464,1739,2178,3272,5462,6582,9844,11991,12628,13353,13898,15230,15494,15804,16954,17406,17764,21084,21712,22803,23793,30082,53539,73032,
chr1	22005099	22109582	TCONS_00002090	0	-	22005099	22109582	255,0,0	27	833,27,49,126,156,105,107,131,111,62,123,125,69,128,115,198,150,129,180,83,134,109,125,128,157,121,266,	0,2201,8584,11367,16459,22891,24905,25655,27120,27519,27860,28137,36782,42429,43043,45291,49963,51097,57839,68460,69531,72900,73920,74385,77939,79056,104217,
chr1	22005099	22109848	TCONS_00002091	0	-	22005099	22109848	255,0,0	27	833,27,49,126,156,105,107,131,111,62,123,125,69,131,115,198,150,129,180,83,134,109,125,128,157,121,532,	0,2201,8584,11367,16459,22891,24905,25655,27120,27519,27860,28137,36782,42429,43043,45291,49963,51097,57839,68460,69531,72900,73920,74385,77939,79056,104217,
chr1	23408931	23495328	TCONS_00002096	0	-	23408931	23495328	255,0,0	5	6615,3191,106,66,70,	0,8751,26583,27146,86327,
chr1	23408931	23495339	TCONS_00002097	0	-	23408931	23495339	255,0,0	4	6615,3191,106,81,	0,8751,26583,86327,
chr1	23633156	23670859	TCONS_00002098	0	-	23633156	23670859	255,0,0	10	4403,122,150,206,136,177,114,108,119,156,	0,4537,6889,11819,14864,16892,26854,31090,31826,37547,
chr1	23637690	23670806	TCONS_00002102	0	-	23637690	23670806	255,0,0	10	125,150,206,136,177,114,108,119,169,103,	0,2355,7285,10330,12358,22320,26556,27292,29654,33013,
chr1	23884087	23885984	TCONS_00002103	0	-	23884087	23885984	255,0,0	3	819,85,367,	0,1338,1530,
chr1	24122087	24126036	TCONS_00002104	0	-	24122087	24126036	255,0,0	11	410,115,78,86,67,114,177,114,116,126,181,	0,553,911,1099,1278,1436,2097,2519,3017,3289,3768,
chr1	24122087	24127147	TCONS_00002105	0	-	24122087	24127147	255,0,0	12	410,115,78,86,67,114,177,114,116,126,71,271,	0,553,911,1099,1278,1436,2097,2519,3017,3289,3768,4789,
chr1	24122087	24127396	TCONS_00002106	0	-	24122087	24127396	255,0,0	12	410,115,78,86,67,114,177,114,116,126,71,195,	0,553,911,1099,1278,1436,2097,2519,3017,3289,3768,5114,
chr1	24128206	24151937	TCONS_00002107	0	-	24128206	24151937	255,0,0	9	848,126,189,64,149,96,108,84,92,	0,2683,6418,9019,12473,14958,15759,18793,23639,
chr1	24170845	24194767	TCONS_00002108	0	-	24170845	24194767	255,0,0	8	1500,100,191,201,106,138,135,380,	0,1718,4293,10004,15442,18778,21135,23542,
chr1	24291137	24306883	TCONS_00002109	0	-	24291137	24306883	255,0,0	6	3076,54,163,104,105,203,	0,6925,7202,10326,14065,15543,
chr1	24291137	24306905	TCONS_00002110	0	-	24291137	24306905	255,0,0	6	3076,51,163,104,105,225,	0,6925,7202,10326,14065,15543,
chr1	24291137	24306927	TCONS_00002111	0	-	24291137	24306927	255,0,0	6	6792,54,163,104,105,247,	0,6925,7202,10326,14065,15543,
chr1	24480658	24513734	TCONS_00002112	0	-	24480658	24513734	255,0,0	7	3723,131,160,143,185,124,54,	0,4883,5305,7373,15248,26562,33022,
chr1	25225864	25256440	TCONS_00002113	0	-	25225864	25256440	255,0,0	5	3293,159,105,157,363,	0,7885,19866,28200,30213,
chr1	25548927	25560117	TCONS_00002122	0	-	25548927	25560117	255,0,0	8	995,99,91,118,126,108,78,234,	0,2565,5005,5681,6561,9667,10007,10956,
chr1	25568404	25573956	TCONS_00002123	0	-	25568404	25573956	255,0,0	4	792,1752,586,157,	0,1636,4530,5395,
chr1	25568404	25573956	TCONS_00002124	0	-	25568404	25573956	255,0,0	5	792,84,152,586,157,	0,1636,3236,4530,5395,
chr1	25568404	25573966	TCONS_00002125	0	-	25568404	25573966	255,0,0	5	792,949,152,586,167,	0,1636,3236,4530,5395,
chr1	26226495	26232915	TCONS_00002131	0	-	26226495	26232915	255,0,0	5	1083,192,173,75,36,	0,1486,3636,4659,6384,
chr1	26286162	26324574	TCONS_00002132	0	-	26286162	26324574	255,0,0	11	2412,155,171,92,114,142,69,97,154,137,59,	0,12886,14808,17010,22692,24274,24788,28559,29776,31055,38353,
chr1	27681617	27683387	TCONS_00002135	0	-	27681617	27683387	255,0,0	5	343,77,74,113,307,	0,542,899,1261,1463,
chr1	27681617	27690044	TCONS_00002136	0	-	27681617	27690044	255,0,0	24	343,77,74,113,160,106,177,166,139,193,158,106,137,128,134,88,96,50,108,163,160,113,171,112,	0,542,899,1261,1463,1882,2273,2584,3054,3292,3582,4290,4731,5114,5578,5794,6030,6219,6393,6578,6964,7514,7724,8315,
chr1	27681617	27693628	TCONS_00002137	0	-	27681617	27693628	255,0,0	29	343,77,74,113,160,106,177,166,139,193,158,106,137,128,134,88,96,50,108,163,160,113,171,107,169,191,24,140,880,	0,542,899,1261,1463,1882,2273,2584,3054,3292,3582,4290,4731,5114,5578,5794,6030,6219,6393,6578,6964,7514,7724,8315,8790,9077,9534,9646,11131,
chr1	27730623	27816671	TCONS_00002138	0	-	27730623	27816671	255,0,0	9	4217,515,156,131,118,154,135,173,175,	0,5562,8442,10703,11855,14146,14831,24647,85873,
chr1	27937925	27961675	TCONS_00002139	0	-	27937925	27961675	255,0,0	14	376,1259,132,154,77,180,156,150,104,99,103,239,63,100,	0,449,1804,3015,3435,4019,4274,5442,5778,10144,11627,12276,13674,23650,
chr1	27937925	27961772	TCONS_00002142	0	-	27937925	27961772	255,0,0	12	1708,132,154,77,180,156,150,104,99,888,63,197,	0,1804,3015,3435,4019,4274,5442,5778,10144,11627,13674,23650,
chr1	27992462	27998730	TCONS_00002144	0	-	27992462	27998730	255,0,0	5	524,150,78,102,97,	0,2274,2506,3293,6171,
chr1	44086123	44086656	TCONS_00002144_add	0	+	44086123	44086656	255,0,0	2	127,148,	0,385,
chr1	27992462	27998772	TCONS_00002145	0	-	27992462	27998772	255,0,0	5	524,150,78,114,139,	0,2274,2506,3281,6171,
chr1	28218060	28241237	TCONS_00002146	0	-	28218060	28241237	255,0,0	9	698,95,108,117,75,114,102,107,293,	0,2462,2740,5455,6083,15378,15631,22513,22884,
chr1	28296854	28415163	TCONS_00002147	0	-	28296854	28415163	255,0,0	18	4203,101,122,115,161,59,90,84,140,184,86,138,137,67,80,44,101,129,	0,8030,18191,19353,23056,26976,29616,33992,40603,42767,46810,57445,65200,68495,72227,78039,87650,118180,
chr1	28296854	28415209	TCONS_00002148	0	-	28296854	28415209	255,0,0	17	4203,101,122,115,161,59,90,84,140,184,86,137,67,80,44,101,175,	0,8030,18191,19353,23056,26976,29616,33992,40603,42767,46810,65200,68495,72227,78039,87650,118180,
chr1	28470773	28503202	TCONS_00002149	0	-	28470773	28503202	255,0,0	2	6797,100,	0,32329,
chr1	28526811	28559532	TCONS_00002154	0	-	28526811	28559532	255,0,0	9	1070,76,92,72,95,67,57,102,101,	0,3446,4957,8041,9671,10270,14639,28621,32620,
chr1	28904518	28908373	TCONS_00002155	0	-	28904518	28908373	255,0,0	6	674,55,70,87,119,272,	0,1526,1905,2553,3104,3583,
chr1	28904518	28908432	TCONS_00002156	0	-	28904518	28908432	255,0,0	5	674,449,87,119,331,	0,1526,2553,3104,3583,
chr1	28929350	28969619	TCONS_00002157	0	-	28929350	28969619	255,0,0	6	736,89,115,78,252,116,	0,2533,10408,15114,19075,40153,
chr1	29474253	29508394	TCONS_00002159	0	-	29474253	29508394	255,0,0	9	1485,90,215,113,143,175,184,136,237,	0,2361,6954,11632,12633,18148,18987,20761,33904,
chr1	29474253	29508415	TCONS_00002161	0	-	29474253	29508415	255,0,0	6	1485,90,215,113,143,258,	0,2361,6954,11632,12633,33904,
chr1	31205315	31230687	TCONS_00002162	0	-	31205315	31230687	255,0,0	8	1449,93,96,123,129,77,94,182,	0,2704,5135,6471,7340,9171,9987,25190,
chr1	31342316	31381353	TCONS_00002166	0	-	31342316	31381353	255,0,0	5	3908,292,614,118,58,	0,4827,7082,9153,38979,
chr1	31342316	31382491	TCONS_00002168	0	-	31342316	31382491	255,0,0	5	3908,292,614,118,29,	0,4827,7082,9153,40146,
chr1	31404351	31538556	TCONS_00002169	0	-	31404351	31538556	255,0,0	23	1838,193,122,126,138,135,130,268,237,297,144,139,152,102,94,271,167,179,109,69,68,374,94,	0,5138,9646,10493,13841,18622,20729,22209,33169,34477,35662,36849,43146,48557,49807,60885,63549,74348,75489,97291,123808,127699,134111,
chr1	31404351	31538556	TCONS_00002170	0	-	31404351	31538556	255,0,0	22	1838,193,122,126,138,135,130,268,237,297,144,139,152,102,94,271,167,179,106,69,374,94,	0,5138,9646,10493,13841,18622,20729,22209,33169,34477,35662,36849,43146,48557,49807,60885,63549,74348,75489,97291,127699,134111,
chr1	31404351	31538562	TCONS_00002171	0	-	31404351	31538562	255,0,0	22	1838,193,122,126,138,135,130,268,237,216,144,139,152,105,94,271,167,179,109,69,374,100,	0,5138,9646,10493,13841,18622,20729,22209,33169,34477,35662,36849,43146,48557,49807,60885,63549,74348,75489,97291,127699,134111,
chr1	31404351	31538590	TCONS_00002172	0	-	31404351	31538590	255,0,0	22	1838,193,122,126,138,129,130,268,237,216,144,139,152,102,94,271,167,179,109,69,374,128,	0,5138,9646,10493,13841,18628,20729,22209,33169,34477,35662,36849,43146,48557,49807,60885,63549,74348,75489,97291,127699,134111,
chr1	31404351	31538673	TCONS_00002173	0	-	31404351	31538673	255,0,0	22	1838,193,122,126,138,129,130,268,237,297,144,139,152,105,94,271,167,179,109,69,374,211,	0,5138,9646,10493,13841,18628,20729,22209,33169,34477,35662,36849,43146,48557,49807,60885,63549,74348,75489,97291,127699,134111,
chr1	31732226	31769745	TCONS_00002178	0	-	31732226	31769745	255,0,0	10	742,104,62,83,121,123,166,94,130,288,	0,2149,8491,9778,11999,21994,29874,32533,33839,37231,
chr1	31819472	31846029	TCONS_00002179	0	-	31819472	31846029	255,0,0	5	92,736,102,173,241,	0,18578,20767,22759,26316,
chr1	32256034	32264348	TCONS_00002183	0	-	32256034	32264348	255,0,0	9	819,187,90,151,151,112,126,117,306,	0,1781,2244,2844,3313,3690,6156,7773,8008,
chr1	32372021	32403732	TCONS_00002184	0	-	32372021	32403732	255,0,0	6	2540,75,131,93,689,145,	0,3617,5275,9474,12549,31566,
chr1	32797078	32801712	TCONS_00002185	0	-	32797078	32801712	255,0,0	3	91,1354,165,	0,2266,4469,
chr1	32799333	32801824	TCONS_00002188	0	-	32799333	32801824	255,0,0	2	1365,277,	0,2214,
chr1	32827896	32860034	TCONS_00002191	0	-	32827896	32860034	255,0,0	11	4359,104,480,79,69,116,55,168,117,61,30,	0,6151,13966,15674,15919,16428,18918,21534,24483,31784,32108,
chr1	33238309	33283046	TCONS_00002193	0	-	33238309	33283046	255,0,0	13	3383,142,194,98,136,86,136,93,81,130,176,147,258,	0,6673,7376,8339,9695,13653,14231,18453,25054,33773,37882,38202,44479,
chr1	33391727	33431116	TCONS_00002198	0	-	33391727	33431116	255,0,0	11	386,8415,132,208,141,115,163,142,206,1172,49,	0,2718,12270,16125,17892,19387,20275,22095,23442,37924,39340,
chr1	33407831	33430051	TCONS_00002200	0	-	33407831	33430051	255,0,0	7	229,141,115,163,145,206,400,	0,1788,3283,4171,5991,7338,21820,
chr1	33472134	33502482	TCONS_00002211	0	-	33472134	33502482	255,0,0	6	6869,73,95,111,126,146,	0,7988,14833,15059,17908,30202,
chr1	33472134	33502555	TCONS_00002218	0	-	33472134	33502555	255,0,0	7	4300,196,73,95,111,126,219,	0,6673,7988,14833,15059,17908,30202,
chr1	33487593	33502484	TCONS_00002219	0	-	33487593	33502484	255,0,0	3	141,126,148,	0,2449,14743,
chr1	33789193	33814889	TCONS_00002223	0	-	33789193	33814889	255,0,0	7	1427,277,142,115,130,203,24,	0,5277,6478,7755,8682,10497,25672,
chr1	33789193	33815288	TCONS_00002225	0	-	33789193	33815288	255,0,0	7	1427,277,142,115,130,108,91,	0,5277,6478,7755,8682,10592,26004,
chr1	33789193	33815377	TCONS_00002226	0	-	33789193	33815377	255,0,0	7	1427,277,142,115,130,203,180,	0,5277,6478,7755,8682,10497,26004,
chr1	35317769	35325371	TCONS_00002232	0	-	35317769	35325371	255,0,0	2	3814,94,	0,7508,
chr1	35445962	35451007	TCONS_00002233	0	-	35445962	35451007	255,0,0	3	1758,181,209,	0,3405,4836,
chr1	35451567	35496419	TCONS_00002234	0	-	35451567	35496419	255,0,0	15	2969,154,38,141,148,173,151,279,116,151,192,175,250,85,272,	0,6267,18001,19165,20984,22785,24480,24791,25923,26464,28730,29021,33386,34416,44580,
chr1	35451567	35497559	TCONS_00002235	0	-	35451567	35497559	255,0,0	16	2969,154,38,141,148,173,151,279,116,151,192,175,250,85,167,144,	0,6267,18001,19165,20984,22785,24480,24791,25923,26464,28730,29021,33386,34416,44580,45848,
chr1	35451567	35497686	TCONS_00002236	0	-	35451567	35497686	255,0,0	16	2969,154,38,141,148,173,151,279,116,151,192,175,250,85,167,455,	0,6267,18001,19165,20984,22785,24480,24791,25923,26464,28730,29021,33386,34416,44580,45664,
chr1	35641856	35657131	TCONS_00002237	0	-	35641856	35657131	255,0,0	11	219,81,48,122,49,118,85,197,96,302,190,	0,1063,1733,10745,10947,11717,12747,12930,14242,14438,15085,
chr1	35898607	36022992	TCONS_00002246	0	-	35898607	36022992	255,0,0	21	2075,92,91,123,143,160,139,152,149,133,124,229,133,93,88,98,102,247,524,170,30,	0,8040,9239,9899,11154,15166,16860,17351,18621,20550,21355,23006,27298,29614,33601,37856,41798,45959,73605,121343,124355,
chr1	35898607	36023004	TCONS_00002247	0	-	35898607	36023004	255,0,0	21	2075,92,91,123,143,160,139,152,149,133,124,229,133,93,88,98,102,247,524,170,197,	0,8040,9239,9899,11154,15166,16860,17351,18621,20550,21355,23006,27298,29614,33601,37856,41798,45959,73605,121343,124200,
chr1	36065077	36107541	TCONS_00002248	0	-	36065077	36107541	255,0,0	6	3898,50,163,71,123,599,	0,5756,9769,31797,36833,41865,
chr1	36179488	36182039	TCONS_00002249	0	-	36179488	36182039	255,0,0	1	2551,	0,
chr1	36179488	36184921	TCONS_00002250	0	-	36179488	36184921	255,0,0	2	2439,614,	0,4819,
chr1	36602173	36615151	TCONS_00002253	0	-	36602173	36615151	255,0,0	5	750,183,100,98,459,	0,1223,3147,3496,12519,
chr1	36805204	36851497	TCONS_00002257	0	-	36805204	36851497	255,0,0	11	2370,85,120,145,116,53,228,144,86,120,174,	0,3760,4256,4516,9096,14760,15602,18635,19133,21617,46119,
chr1	36805204	36851504	TCONS_00002258	0	-	36805204	36851504	255,0,0	12	2370,85,120,145,116,53,228,144,86,120,233,181,	0,3760,4256,4516,9096,14760,15602,18635,19133,21617,28248,46119,
chr1	36805204	36863533	TCONS_00002260	0	-	36805204	36863533	255,0,0	12	2370,85,120,145,116,53,228,144,86,120,792,166,	0,3760,4256,4516,9096,14760,15602,18635,19133,21617,53758,58163,
chr1	36920958	36930008	TCONS_00002262	0	-	36920958	36930008	255,0,0	8	568,192,59,85,49,76,45,262,	0,829,2565,5334,5906,6730,8448,8788,
chr1	36931142	36948597	TCONS_00002263	0	-	36931142	36948597	255,0,0	17	1286,82,94,141,147,102,189,214,74,154,170,188,124,297,84,60,186,	0,1688,2016,2280,2533,3614,4110,5891,6524,6696,6975,7893,8222,9835,13891,15936,17269,
chr1	37957775	37980373	TCONS_00002265	0	-	37957775	37980373	255,0,0	7	1933,34,193,46,88,116,116,	0,3710,9629,17103,17280,21248,22482,
chr1	38000742	38019909	TCONS_00002266	0	-	38000742	38019909	255,0,0	4	2871,599,103,303,	0,5015,17503,18864,
chr1	45189432	45191528	TCONS_00002266_add	0	+	45189432	45191528	255,0,0	7	146,123,73,130,78,185,566,	0,361,559,778,1001,1272,1530,
chr1	38032232	38061535	TCONS_00002267	0	-	38032232	38061535	255,0,0	16	376,92,83,452,114,159,105,129,114,159,67,185,140,95,85,176,	0,1041,1643,2219,7711,8033,8963,9796,15591,16146,17235,20679,24074,26080,27130,29127,
chr1	38274649	38325266	TCONS_00002268	0	-	38274649	38325266	255,0,0	11	6589,64,596,103,78,137,74,132,239,459,64,	0,8441,13143,14732,23267,26101,26693,29647,30942,48273,50553,
chr1	38422650	38461690	TCONS_00002271	0	-	38422650	38461690	255,0,0	18	1285,56,91,111,165,70,108,68,69,139,83,92,73,106,53,48,733,113,	0,3141,11065,12375,12592,19905,21741,22009,22486,23607,24750,27190,27728,30594,30805,32569,32891,38927,
chr1	38462319	38465105	TCONS_00002276	0	-	38462319	38465105	255,0,0	5	912,187,170,175,177,	0,1036,1315,2326,2609,
chr1	38462319	38471210	TCONS_00002278	0	-	38462319	38471210	255,0,0	6	912,187,170,175,176,182,	0,1036,1315,2326,2609,8709,
chr1	38462319	38471225	TCONS_00002279	0	-	38462319	38471225	255,0,0	6	912,187,170,175,176,115,	0,1036,1315,2326,2609,8791,
chr1	39303869	39325399	TCONS_00002281	0	-	39303869	39325399	255,0,0	7	1507,149,143,115,200,204,318,	0,7741,13417,14176,17510,18681,21212,
chr1	39327542	39339129	TCONS_00002282	0	-	39327542	39339129	255,0,0	5	2844,130,49,73,167,	0,5009,5691,11147,11420,
chr1	40026425	40042502	TCONS_00002284	0	-	40026425	40042502	255,0,0	16	369,103,131,94,128,87,72,88,273,96,138,95,140,253,194,1072,	0,931,1319,1569,2860,3082,3717,3932,4352,6997,8048,8841,9109,10343,11639,15005,
chr1	40026425	40042514	TCONS_00002285	0	-	40026425	40042514	255,0,0	16	369,103,131,94,128,87,72,88,273,96,138,95,140,116,194,1084,	0,931,1319,1569,2860,3082,3717,3932,4352,6997,8048,8841,9109,10480,11639,15005,
chr1	40026425	40042514	TCONS_00002286	0	-	40026425	40042514	255,0,0	16	369,103,131,94,128,87,120,88,273,96,138,95,140,116,194,291,	0,931,1319,1569,2860,3082,3669,3932,4352,6997,8048,8841,9109,10480,11639,15798,
chr1	40359774	40367545	TCONS_00002290	0	-	40359774	40367545	255,0,0	3	3868,505,66,	0,6836,7705,
chr1	40359774	40367550	TCONS_00002291	0	-	40359774	40367550	255,0,0	2	3868,940,	0,6836,
chr1	40537061	40563018	TCONS_00002295	0	-	40537061	40563018	255,0,0	9	2794,72,99,91,103,71,128,110,232,	0,5452,7170,9007,18020,19939,20655,21008,25725,
chr1	40766122	40778301	TCONS_00002296	0	-	40766122	40778301	255,0,0	27	931,78,189,55,147,33,45,36,72,54,54,54,45,54,54,54,54,54,54,54,54,57,48,54,54,24,56,	0,1361,2170,2680,3079,3356,3477,3613,3869,4025,4343,5264,5692,6995,7252,7741,9487,9660,9813,10263,10642,10779,11049,11211,11608,12005,12123,
chr1	42642122	42776840	TCONS_00002300	0	-	42642122	42776840	255,0,0	12	3374,108,192,102,417,175,129,102,84,75,325,120,	0,5465,12285,12851,14851,18438,22650,29310,51431,88663,101896,134598,
chr1	42642122	42800807	TCONS_00002301	0	-	42642122	42800807	255,0,0	13	3374,108,192,102,417,175,129,102,84,75,437,61,78,	0,5465,12285,12851,14851,18438,22650,29310,51431,88663,101896,134598,158607,
chr1	42642122	42800889	TCONS_00002302	0	-	42642122	42800889	255,0,0	13	3374,108,192,102,417,175,129,102,84,75,325,61,160,	0,5465,12285,12851,14851,18438,22650,29310,51431,88663,101896,134598,158607,
chr1	43211896	43232671	TCONS_00002303	0	-	43211896	43232671	255,0,0	15	627,141,76,118,151,96,128,122,53,90,140,132,190,153,494,	0,1046,1497,1974,3960,6048,6311,8643,8939,9322,11557,12626,12975,16097,20281,
chr1	43391242	43424528	TCONS_00002305	0	-	43391242	43424528	255,0,0	10	1670,204,102,105,188,163,241,161,96,224,	0,2033,3360,3638,4021,4301,5054,5474,17654,33062,
chr1	43629451	43637975	TCONS_00002306	0	-	43629451	43637975	255,0,0	9	713,163,94,76,90,124,173,84,252,	0,862,3045,3379,5158,6975,7698,8105,8272,
chr1	43828639	43833686	TCONS_00002308	0	-	43828639	43833686	255,0,0	8	1169,137,106,57,81,191,60,101,	0,1355,1573,1769,1959,2217,2595,4946,
chr1	43849593	43855495	TCONS_00002313	0	-	43849593	43855495	255,0,0	7	1184,249,82,141,145,180,66,	0,2055,2666,2935,3580,4387,5836,
chr1	43849593	43855659	TCONS_00002314	0	-	43849593	43855659	255,0,0	7	1184,249,82,141,145,119,230,	0,2055,2666,2935,3580,4387,5836,
chr1	44686604	44804996	TCONS_00002315	0	-	44686604	44804996	255,0,0	7	708,100,73,92,60,117,280,	0,27006,63902,87377,92236,98695,118112,
chr1	44686604	44820734	TCONS_00002317	0	-	44686604	44820734	255,0,0	9	708,100,73,92,60,117,278,76,171,	0,27006,63902,87377,92236,98695,118112,131917,133959,
chr1	45307635	45452259	TCONS_00002319	0	-	45307635	45452259	255,0,0	13	25,203,104,149,78,191,128,90,112,160,146,157,95,	0,8837,15740,32714,33654,37854,39648,55391,84664,99542,136351,139057,144529,
chr1	45468083	45475968	TCONS_00002321	0	-	45468083	45475968	255,0,0	19	1165,72,82,75,130,207,90,120,104,65,53,183,82,166,83,114,116,136,96,	0,1257,1443,1648,1836,2188,3382,3585,4280,4539,4807,5001,5828,6124,6732,6957,7156,7574,7789,
chr1	45468083	45477218	TCONS_00002323	0	-	45468083	45477218	255,0,0	21	1165,72,82,75,130,207,90,120,104,65,53,183,82,166,83,114,116,136,93,161,658,	0,1257,1443,1648,1836,2188,3382,3585,4280,4539,4807,5001,5828,6124,6732,6957,7156,7574,7789,8134,8477,
chr1	45468083	45478756	TCONS_00002324	0	-	45468083	45478756	255,0,0	21	1165,72,82,75,130,207,90,120,104,65,53,183,82,166,83,114,116,136,93,161,68,	0,1257,1443,1648,1836,2188,3382,3585,4280,4539,4807,5001,5828,6124,6732,6957,7156,7574,7789,8134,10605,
chr1	45976641	45987674	TCONS_00002327	0	-	45976641	45987674	255,0,0	6	445,131,123,154,117,174,	0,3537,3903,4684,7968,10859,
chr1	46092851	46152222	TCONS_00002329	0	-	46092851	46152222	255,0,0	12	1229,103,125,159,141,194,73,287,130,115,1042,139,	0,2396,3302,6309,6916,13030,15247,27363,28010,31848,33004,59232,
chr1	46092851	46152345	TCONS_00002330	0	-	46092851	46152345	255,0,0	13	1229,103,125,159,141,194,73,287,130,115,1042,45,262,	0,2396,3302,6309,6916,13030,15247,27363,28010,31848,33004,58396,59232,
chr1	46092851	46152787	TCONS_00002331	0	-	46092851	46152787	255,0,0	12	1229,103,125,159,141,194,73,287,130,115,1042,123,	0,2396,3302,6309,6916,13030,15247,27363,28010,31848,33004,59813,
chr1	46092851	46152822	TCONS_00002332	0	-	46092851	46152822	255,0,0	13	1229,103,125,159,141,194,73,287,130,115,1042,45,158,	0,2396,3302,6309,6916,13030,15247,27363,28010,31848,33004,58396,59813,
chr1	46654167	46664105	TCONS_00002334	0	-	46654167	46664105	255,0,0	22	862,110,136,45,65,126,129,73,59,42,84,76,71,128,99,118,114,66,119,115,170,98,	0,962,1358,1977,2224,3602,3812,4022,4404,4678,4809,5068,5359,5778,6057,6348,7315,7516,8235,8474,9206,9840,
chr1	46743229	46769261	TCONS_00002335	0	-	46743229	46769261	255,0,0	10	1527,76,123,99,165,261,1138,71,87,466,	0,1624,1934,2634,2838,3567,7804,20005,20726,25566,
chr1	47023002	47069922	TCONS_00002339	0	-	47023002	47069922	255,0,0	13	1470,165,195,96,56,105,74,80,98,102,101,168,66,	0,4147,5318,7710,11112,14732,17616,19244,23199,25897,28543,36782,46854,
chr1	47023002	47070428	TCONS_00002343	0	-	47023002	47070428	255,0,0	13	1470,44,165,195,96,56,105,74,80,98,102,168,530,	0,2903,4147,5318,7710,11112,14732,17616,19244,23199,25897,36782,46896,
chr1	47073034	47082525	TCONS_00002346	0	-	47073034	47082525	255,0,0	4	2322,203,468,143,	0,2639,5541,9348,
chr1	47098436	47162324	TCONS_00002349	0	-	47098436	47162324	255,0,0	15	3206,108,96,48,51,63,51,109,168,126,112,87,105,111,102,	0,10429,12396,19816,21052,25362,25922,32491,45704,50535,51726,54019,56822,59062,63786,
chr1	47140664	47184901	TCONS_00002350	0	-	47140664	47184901	255,0,0	11	3644,126,112,87,192,105,111,99,146,149,1327,	0,8307,9498,11791,13360,14594,16834,21558,32913,41302,42910,
chr1	47140664	47184920	TCONS_00002351	0	-	47140664	47184920	255,0,0	10	3644,126,112,87,105,111,99,146,149,1346,	0,8307,9498,11791,14594,16834,21558,32913,41302,42910,
chr1	47681917	47691287	TCONS_00002352	0	-	47681917	47691287	255,0,0	4	3601,228,95,173,	0,3701,7758,9197,
chr1	47681917	47696956	TCONS_00002354	0	-	47681917	47696956	255,0,0	4	3929,95,156,238,	0,7758,12950,14801,
chr1	47681917	47697883	TCONS_00002355	0	-	47681917	47697883	255,0,0	5	3929,95,447,156,45,	0,7758,9197,12950,15921,
chr1	50884801	50889144	TCONS_00002358	0	-	50884801	50889144	255,0,0	3	605,567,357,	0,1848,3986,
chr1	50887126	50889118	TCONS_00002359	0	-	50887126	50889118	255,0,0	2	90,335,	0,1657,
chr1	51819956	51984955	TCONS_00002364	0	-	51819956	51984955	255,0,0	25	2562,185,163,77,67,134,36,91,114,204,198,162,73,86,157,146,90,60,126,66,96,48,90,42,85,	0,6886,9581,11668,40096,44747,46633,48150,49134,51620,53850,55250,67501,86062,90604,92675,93761,106806,109388,110976,114188,117405,118574,126988,164914,
chr1	52254822	52344440	TCONS_00002365	0	-	52254822	52344440	255,0,0	33	283,90,117,91,84,53,48,139,32,163,128,151,52,120,87,124,105,55,59,121,78,70,74,58,123,96,74,154,82,70,134,289,494,	0,417,1382,1749,2427,2895,3226,5321,5672,9098,11405,14663,16359,17643,20164,21130,22843,24884,25400,25542,27161,28915,30649,32347,34513,36136,38645,44866,46980,47218,48336,51075,89124,
chr1	52254822	52344530	TCONS_00002366	0	-	52254822	52344530	255,0,0	31	283,90,117,91,84,53,48,139,32,163,128,151,52,120,87,124,105,55,59,121,78,70,74,58,123,96,74,154,82,289,584,	0,417,1382,1749,2427,2895,3226,5321,5672,9098,11405,14663,16359,17643,20164,21130,22843,24884,25400,25542,27161,28915,30649,32347,34513,36136,38645,44866,46980,51075,89124,
chr1	52485804	52520941	TCONS_00002367	0	-	52485804	52520941	255,0,0	7	880,84,70,74,53,61,270,	0,3358,4377,7142,8445,21404,34867,
chr1	52815327	52831836	TCONS_00002368	0	-	52815327	52831836	255,0,0	25	3568,130,91,100,52,59,74,117,59,126,173,118,131,73,131,108,76,179,160,126,159,104,145,83,96,	0,3862,4952,5184,5742,5952,6115,6530,6728,7345,7870,8125,8675,9030,9371,9594,9803,10049,10418,10768,11318,11857,12946,14896,16413,
chr1	52815327	52831852	TCONS_00002369	0	-	52815327	52831852	255,0,0	25	3568,130,91,100,52,59,74,117,59,126,173,136,131,73,131,108,76,179,160,126,159,104,145,83,112,	0,3862,4952,5184,5742,5952,6115,6530,6728,7345,7870,8125,8675,9030,9371,9594,9803,10049,10418,10768,11318,11857,12946,14896,16413,
chr1	53692601	53704264	TCONS_00002374	0	-	53692601	53704264	255,0,0	4	215,83,59,232,	0,1942,8647,11431,
chr1	53692601	53704674	TCONS_00002375	0	-	53692601	53704674	255,0,0	5	215,83,111,59,642,	0,1942,6612,8647,11431,
chr1	54317313	54355485	TCONS_00002378	0	-	54317313	54355485	255,0,0	10	630,98,183,167,117,88,81,164,80,100,	0,8415,14559,15117,19731,26674,27001,31472,37266,38072,
chr1	54317313	54355695	TCONS_00002380	0	-	54317313	54355695	255,0,0	13	630,51,98,183,167,117,88,81,89,164,80,220,310,	0,3360,8415,14559,15117,19731,26674,27001,31302,31472,37266,37603,38072,
chr1	54317313	54355897	TCONS_00002384	0	-	54317313	54355897	255,0,0	12	630,51,98,183,167,117,88,81,164,80,220,512,	0,3360,8415,14559,15117,19731,26674,27001,31472,37266,37603,38072,
chr1	54387146	54411382	TCONS_00002385	0	-	54387146	54411382	255,0,0	6	294,44,69,107,113,155,	0,2430,6898,8565,18511,24081,
chr1	54496733	54519107	TCONS_00002388	0	-	54496733	54519107	255,0,0	8	1245,109,82,82,153,95,106,435,	0,5549,9695,10663,12312,14631,16206,21939,
chr1	54496733	54519128	TCONS_00002389	0	-	54496733	54519128	255,0,0	8	1245,109,85,82,153,95,106,456,	0,5549,9695,10663,12312,14631,16206,21939,
chr1	54690639	54871822	TCONS_00002392	0	-	54690639	54871822	255,0,0	17	2194,102,29,79,71,55,36,49,65,77,67,60,90,85,62,73,197,	0,3288,3482,3781,14162,15938,16507,17197,18268,26649,26827,32160,56471,176894,179609,179891,180986,
chr1	55315187	55352891	TCONS_00002393	0	-	55315187	55352891	255,0,0	9	2872,179,198,144,264,119,106,156,330,	0,3919,4522,15788,21835,25578,26427,34103,37374,
chr1	56960440	57045408	TCONS_00002397	0	-	56960440	57045408	255,0,0	6	1908,177,58,278,158,858,	0,17207,29054,29508,42186,84110,
chr1	59040956	59043051	TCONS_00002399	0	-	59040956	59043051	255,0,0	1	2095,	0,
chr1	59120413	59165702	TCONS_00002400	0	-	59120413	59165702	255,0,0	20	5414,58,106,133,189,75,51,55,89,78,104,131,761,99,79,24,78,71,79,46,	0,6428,6664,10757,12296,13105,13890,14242,17128,18831,20735,22184,27043,30411,34296,35484,35598,38119,40387,45243,
chr1	59246462	59250637	TCONS_00002401	0	-	59246462	59250637	255,0,0	1	4175,	0,
chr1	62146440	62190799	TCONS_00002402	0	-	62146440	62190799	255,0,0	7	582,130,74,92,109,72,173,	0,2648,13928,20165,28560,42944,44186,
chr1	62146440	62190804	TCONS_00002403	0	-	62146440	62190804	255,0,0	7	582,130,74,92,109,70,180,	0,2648,13928,20165,28560,42944,44184,
chr1	62146440	62190827	TCONS_00002404	0	-	62146440	62190827	255,0,0	7	582,130,74,92,109,60,254,	0,2648,13928,20165,28560,42944,44133,
chr1	62920310	63128802	TCONS_00002405	0	-	62920310	63128802	255,0,0	47	817,168,107,144,237,90,135,132,144,193,101,159,153,135,97,97,136,183,155,170,140,171,114,141,96,90,170,165,232,87,102,139,71,118,163,94,143,166,81,150,67,86,213,130,69,176,107,	0,2898,19342,20568,21067,21427,23060,34294,38064,39635,40941,41699,49990,51042,53322,55937,58831,59076,73511,74637,80853,83251,84905,85112,87968,89016,98092,101185,104349,106977,122622,124188,128544,131867,164066,165260,170619,176600,178858,180133,181897,193051,193466,193775,199085,199344,208385,
chr1	62920310	63153966	TCONS_00002406	0	-	62920310	63153966	255,0,0	48	817,168,107,144,237,90,135,132,144,193,101,159,153,135,97,97,136,183,155,170,140,171,114,141,96,90,170,165,232,87,102,139,71,118,163,94,143,166,81,150,67,86,213,130,69,176,106,69,	0,2898,19342,20568,21067,21427,23060,34294,38064,39635,40941,41699,49990,51042,53322,55937,58831,59076,73511,74637,80853,83251,84905,85112,87968,89016,98092,101185,104349,106977,122622,124188,128544,131867,164066,165260,170619,176600,178858,180133,181897,193051,193466,193775,199085,199344,208385,233587,
chr1	65298830	65431761	TCONS_00002411	0	-	65298830	65431761	255,0,0	25	1510,111,118,173,125,193,95,151,152,136,128,88,144,107,190,124,158,186,343,164,154,124,199,83,30,	0,2248,2950,4784,5317,6455,8097,8303,10916,11606,12365,13501,14384,17656,22361,24508,26957,31639,33718,36163,40222,45877,50129,53111,132901,
chr1	65298830	65432240	TCONS_00002412	0	-	65298830	65432240	255,0,0	25	1510,111,118,173,125,193,95,151,152,136,128,88,144,107,190,124,158,186,343,164,154,124,199,83,225,	0,2248,2950,4784,5317,6455,8097,8303,10916,11606,12365,13501,14384,17656,22361,24508,26957,31639,33718,36163,40222,45877,50129,53111,133185,
chr1	67872996	67896106	TCONS_00002413	0	-	67872996	67896106	255,0,0	8	5950,174,178,123,90,141,151,436,	0,7852,12695,16886,17574,17769,18821,22674,
chr1	67872996	67896711	TCONS_00002415	0	-	67872996	67896711	255,0,0	9	5950,174,178,78,72,141,151,476,219,	0,7852,12695,16886,17574,17769,18821,22674,23496,
chr1	67885688	67896098	TCONS_00002416	0	-	67885688	67896098	255,0,0	6	181,78,90,141,151,428,	0,4194,4882,5077,6129,9982,
chr1	68167075	68243193	TCONS_00002419	0	-	68167075	68243193	255,0,0	3	4184,119,53,	0,6201,76065,
chr1	68167075	68299140	TCONS_00002420	0	-	68167075	68299140	255,0,0	4	4184,119,50,114,	0,6201,76065,131951,
chr1	68564102	68698223	TCONS_00002421	0	-	68564102	68698223	255,0,0	12	334,154,84,144,64,98,169,137,162,125,273,347,	0,39360,46149,47449,49716,50143,51768,55097,56679,60703,95535,133774,
chr1	68590870	68698228	TCONS_00002422	0	-	68590870	68698228	255,0,0	12	1148,154,84,144,64,98,169,137,162,125,273,352,	0,12592,19381,20681,22948,23375,25000,28329,29911,33935,68767,107006,
chr1	71318068	71513471	TCONS_00002425	0	-	71318068	71513471	255,0,0	3	474,180,1108,	0,159919,194295,
chr1	71318068	71514345	TCONS_00002426	0	-	71318068	71514345	255,0,0	4	474,27,180,1982,	0,101377,159919,194295,
chr1	71434108	71513924	TCONS_00002427	0	-	71434108	71513924	255,0,0	4	3308,92,180,1561,	0,5871,43879,78255,
chr1	71471565	71513364	TCONS_00002428	0	-	71471565	71513364	255,0,0	2	6602,1001,	0,40798,
chr1	71527520	71546716	TCONS_00002429	0	-	71527520	71546716	255,0,0	11	3300,75,159,87,170,135,77,83,109,53,94,	0,3840,4938,7438,8989,10283,10634,14957,16619,16818,19102,
chr1	71527520	71546719	TCONS_00002430	0	-	71527520	71546719	255,0,0	10	3300,159,87,170,135,77,83,109,53,97,	0,4938,7438,8989,10283,10634,14957,16619,16818,19102,
chr1	75170288	75198729	TCONS_00002431	0	-	75170288	75198729	255,0,0	9	1853,96,102,150,52,164,153,124,90,	0,2294,2498,5493,9974,14604,18513,20106,28351,
chr1	75170288	75198732	TCONS_00002432	0	-	75170288	75198732	255,0,0	10	1853,96,102,150,52,164,153,124,39,93,	0,2294,2498,5493,9974,14604,18513,20106,25777,28351,
chr1	78161476	78212204	TCONS_00002438	0	-	78161476	78212204	255,0,0	25	1683,69,103,109,82,170,127,181,46,34,95,173,113,141,418,79,114,70,103,153,63,54,132,179,121,	0,2071,5577,15955,17408,18822,19950,22075,22804,25380,26039,26232,27539,29830,32503,34068,34826,38555,40264,43473,45085,45584,45825,49629,50607,
chr1	78161476	78225514	TCONS_00002439	0	-	78161476	78225514	255,0,0	25	1683,69,103,109,82,170,127,181,46,34,71,173,113,141,418,79,114,70,103,153,63,54,132,218,187,	0,2071,5577,15955,17408,18822,19950,22075,22804,25380,26039,26232,27539,29830,32503,34068,34826,38555,40264,43473,45085,45584,45825,49629,63851,
chr1	78161476	78225530	TCONS_00002440	0	-	78161476	78225530	255,0,0	23	1683,69,109,82,170,127,181,46,34,71,173,113,141,418,79,114,70,103,153,63,54,132,203,	0,2071,15955,17408,18822,19950,22075,22804,25380,26039,26232,27539,29830,32503,34068,34826,38555,40264,43473,45085,45584,45825,63851,
chr1	78161476	78225530	TCONS_00002441	0	-	78161476	78225530	255,0,0	24	1683,69,103,109,82,170,127,181,46,34,95,173,113,141,418,79,114,70,103,153,63,54,132,145,	0,2071,5577,15955,17408,18822,19950,22075,22804,25380,26039,26232,27539,29830,32503,34068,34826,38555,40264,43473,45085,45584,45825,63909,
chr1	78408143	78444738	TCONS_00002447	0	-	78408143	78444738	255,0,0	20	6316,146,75,129,80,152,161,142,101,103,102,99,163,58,72,53,40,39,91,170,	0,6696,12796,14113,17725,17885,20311,21115,21603,21795,22187,22411,22609,24234,24424,24589,25167,25705,27465,36425,
chr1	78408143	78444742	TCONS_00002448	0	-	78408143	78444742	255,0,0	22	1811,47,1322,146,75,129,80,152,161,142,101,103,102,99,163,58,72,50,40,39,91,174,	0,4071,4994,6696,12796,14113,17725,17885,20311,21115,21603,21795,22187,22411,22609,24234,24424,24589,25167,25705,27465,36425,
chr1	51701996	51739723	TCONS_00002448_add	0	+	51701996	51739723	255,0,0	3	555,170,2901,	0,33631,34826,
chr1	84963897	84972457	TCONS_00002461	0	-	84963897	84972457	255,0,0	3	334,145,764,	0,3611,7796,
chr1	84963897	84972700	TCONS_00002462	0	-	84963897	84972700	255,0,0	4	334,145,291,582,	0,3611,7796,8221,
chr1	84963897	85040150	TCONS_00002463	0	-	84963897	85040150	255,0,0	8	334,145,162,98,172,209,139,229,	0,3611,65042,65520,67626,71716,72367,76024,
chr1	85391004	85462784	TCONS_00002467	0	-	85391004	85462784	255,0,0	16	1400,122,207,4219,123,102,150,113,100,97,85,154,174,160,99,306,	0,4236,6040,8053,12433,12659,14231,15557,21711,26921,27124,31109,33207,40227,46614,71474,
chr1	85391004	85462801	TCONS_00002468	0	-	85391004	85462801	255,0,0	15	1400,122,207,123,102,150,113,100,97,85,154,174,160,99,323,	0,4236,6040,12433,12659,14231,15557,21711,26921,27124,31109,33207,40227,46614,71474,
chr1	85391004	85462815	TCONS_00002469	0	-	85391004	85462815	255,0,0	14	1400,122,207,123,102,150,113,100,97,85,154,174,160,337,	0,4236,6040,12433,12659,14231,15557,21711,26921,27124,31109,33207,40227,71474,
chr1	85391004	85462836	TCONS_00002471	0	-	85391004	85462836	255,0,0	15	1400,1298,207,123,102,150,113,100,97,85,154,174,160,99,358,	0,4236,6040,12433,12659,14231,15557,21711,26921,27124,31109,33207,40227,46614,71474,
chr1	85731322	85742509	TCONS_00002476	0	-	85731322	85742509	255,0,0	3	2343,289,531,	0,4978,10656,
chr1	87327902	87379810	TCONS_00002479	0	-	87327902	87379810	255,0,0	5	1386,50,64,168,100,	0,5833,18442,41061,51808,
chr1	89318288	89357777	TCONS_00002482	0	-	89318288	89357777	255,0,0	8	741,282,130,147,134,107,148,55,	0,4600,7276,7534,11375,34655,38877,39434,
chr1	89401220	89458511	TCONS_00002483	0	-	89401220	89458511	255,0,0	14	708,87,74,187,90,77,121,126,87,150,145,59,100,244,	0,7467,7812,13553,17525,19611,25629,25843,26521,29291,33132,33871,52714,57047,
chr1	89401220	89458601	TCONS_00002484	0	-	89401220	89458601	255,0,0	15	708,87,74,187,90,77,121,126,87,150,145,59,100,174,32,	0,7467,7812,13553,17525,19611,25629,25843,26521,29291,33132,33871,52714,57047,57349,
chr1	89401220	89458636	TCONS_00002486	0	-	89401220	89458636	255,0,0	14	708,87,74,187,90,77,121,126,87,150,145,59,164,67,	0,7467,7812,13553,17525,19611,25629,25843,26521,29291,33132,33871,57047,57349,
chr1	89444686	89458594	TCONS_00002489	0	-	89444686	89458594	255,0,0	4	5063,100,164,25,	0,9248,13581,13883,
chr1	89472257	89488542	TCONS_00002496	0	-	89472257	89488542	255,0,0	12	1278,194,103,213,200,243,197,110,128,86,212,176,	0,2372,2817,4329,5253,6610,7508,7972,8712,13551,13957,16109,
chr1	89472257	89488594	TCONS_00002502	0	-	89472257	89488594	255,0,0	11	1278,194,103,213,281,243,197,110,128,212,228,	0,2372,2817,4329,5172,6610,7508,7972,8712,13957,16109,
chr1	89517494	89531001	TCONS_00002504	0	-	89517494	89531001	255,0,0	11	1657,194,103,213,281,243,203,110,128,209,159,	0,2870,3301,4204,5042,6180,7029,7505,8385,11233,13348,
chr1	89564703	89591806	TCONS_00002506	0	-	89564703	89591806	255,0,0	13	145,2308,269,194,103,213,281,243,197,110,128,207,261,	0,5724,9002,10656,11143,13451,14995,17971,18556,21158,22122,22756,26842,
chr1	89582334	89591806	TCONS_00002514	0	-	89582334	89591806	255,0,0	6	583,222,110,128,207,261,	0,900,3527,4491,5125,9211,
chr1	89598981	89664632	TCONS_00002522	0	-	89598981	89664632	255,0,0	11	70,83,103,213,281,246,197,110,128,195,155,	0,53145,53701,55283,56739,57962,59605,60004,61998,63811,65496,
chr1	89646828	89664592	TCONS_00002523	0	-	89646828	89664592	255,0,0	10	4324,194,103,213,246,197,110,128,195,115,	0,5187,5854,7436,10115,11758,12157,14151,15964,17649,
chr1	89646828	89664640	TCONS_00002526	0	-	89646828	89664640	255,0,0	12	1233,233,194,103,213,281,246,197,110,128,195,163,	0,4091,5187,5854,7436,8892,10115,11758,12157,14151,15964,17649,
chr1	89646828	89665080	TCONS_00002527	0	-	89646828	89665080	255,0,0	11	4324,194,103,213,281,246,197,110,128,195,603,	0,5187,5854,7436,8892,10115,11758,12157,14151,15964,17649,
chr1	89721758	89738558	TCONS_00002528	0	-	89721758	89738558	255,0,0	12	4742,182,103,213,281,243,197,110,128,209,108,424,	0,6144,6607,7660,8610,10270,10881,11341,12653,13290,14679,16376,
chr1	93303081	93427055	TCONS_00002540	0	-	93303081	93427055	255,0,0	5	6671,177,108,135,123,	0,9658,13323,38771,123851,
chr1	93617418	93646052	TCONS_00002541	0	-	93617418	93646052	255,0,0	5	3027,49,184,98,442,	0,4174,4438,8267,28192,
chr1	93617418	93646058	TCONS_00002542	0	-	93617418	93646058	255,0,0	4	3027,184,98,448,	0,4438,8267,28192,
chr1	94027142	94147255	TCONS_00002543	0	-	94027142	94147255	255,0,0	12	834,213,112,172,116,653,104,443,120,40,328,102,	0,5693,6154,10084,14428,20715,22432,27391,30679,80717,113027,120011,
chr1	94027142	94171707	TCONS_00002545	0	-	94027142	94171707	255,0,0	12	834,213,112,172,116,653,104,443,129,40,328,60,	0,5693,6154,10084,14428,20715,22432,27391,30679,80717,113027,144505,
chr1	94334675	94344744	TCONS_00002547	0	-	94334675	94344744	255,0,0	7	825,110,165,96,139,1595,112,	0,1563,2952,3999,6525,7148,9957,
chr1	94350559	94370211	TCONS_00002548	0	-	94350559	94370211	255,0,0	6	4156,115,203,60,85,133,	0,9610,11614,12835,16581,19519,
chr1	94350559	94375126	TCONS_00002549	0	-	94350559	94375126	255,0,0	7	4156,115,203,60,85,66,533,	0,9610,11614,12835,16581,19519,24034,
chr1	94994721	95007325	TCONS_00002550	0	-	94994721	95007325	255,0,0	7	1431,160,179,200,112,495,233,	0,3155,3924,6799,11091,11406,12371,
chr1	94994721	95008427	TCONS_00002552	0	-	94994721	95008427	255,0,0	6	1431,160,179,200,112,1335,	0,3155,3924,6799,11091,12371,
chr1	94994721	95008512	TCONS_00002553	0	-	94994721	95008512	255,0,0	7	1431,160,179,200,112,174,986,	0,3155,3924,6799,11091,12371,12805,
chr1	96913391	96913980	TCONS_00002555	0	-	96913391	96913980	255,0,0	2	51,214,	0,375,
chr1	97543297	98386608	TCONS_00002557	0	-	97543297	98386608	255,0,0	23	1405,141,144,180,143,120,121,84,69,165,216,185,211,170,108,88,82,197,162,88,83,111,169,	0,4588,20747,115327,157110,227517,228435,295819,304651,372317,437984,471818,496018,515476,517317,601353,613975,621609,643768,662650,750372,805522,843142,
chr1	100174158	100214558	TCONS_00002558	0	-	100174158	100214558	255,0,0	16	518,62,144,59,98,87,116,114,148,99,183,148,95,137,196,106,	0,595,2203,3502,3815,6983,8807,10931,19890,21047,29483,32190,33576,38691,39970,40294,
chr1	100174158	100232177	TCONS_00002560	0	-	100174158	100232177	255,0,0	17	518,62,144,59,98,87,116,114,148,99,183,148,95,137,196,105,15,	0,595,2203,3502,3815,6983,8807,10931,19890,21047,29483,32190,33576,38691,39970,40294,58004,
chr1	101337958	101360680	TCONS_00002562	0	-	101337958	101360680	255,0,0	5	2028,71,428,76,492,	0,4391,5073,16350,22230,
chr1	108113811	108507687	TCONS_00002565	0	-	108113811	108507687	255,0,0	27	2183,152,130,88,117,35,66,137,46,26,101,102,110,133,86,87,69,96,100,104,69,93,109,66,59,117,400,	0,2857,25022,31207,31857,38741,46377,71429,112298,117191,133360,133770,177778,178272,179927,184237,186071,189594,193886,195257,197251,199446,201545,206041,208244,303711,393476,
chr1	108677403	108742889	TCONS_00002566	0	-	108677403	108742889	255,0,0	10	2056,151,168,108,153,159,112,88,127,312,	0,4276,8761,13497,20201,22680,26400,47159,51046,65174,
chr1	109471513	109506098	TCONS_00002568	0	-	109471513	109506098	255,0,0	12	3610,318,342,147,98,94,141,222,108,102,140,116,	0,5733,8185,10744,11153,12513,14583,14944,18719,20928,21417,34469,
chr1	109512497	109566145	TCONS_00002569	0	-	109512497	109566145	255,0,0	14	1697,219,132,171,170,158,76,258,179,124,803,85,84,169,	0,4660,11857,12733,13406,16647,21378,25704,32348,34716,41040,43965,47642,53479,
chr1	109512497	109584710	TCONS_00002570	0	-	109512497	109584710	255,0,0	15	1697,219,132,171,170,158,76,258,179,124,803,85,84,167,227,	0,4660,11857,12733,13406,16647,21378,25704,32348,34716,41040,43965,47642,53479,71986,
chr1	109604968	109618764	TCONS_00002571	0	-	109604968	109618764	255,0,0	4	2347,98,79,222,	0,3788,12640,13574,
chr1	109852195	109932516	TCONS_00002573	0	-	109852195	109932516	255,0,0	20	4484,124,107,109,117,190,191,169,103,107,156,145,131,50,74,165,103,74,60,120,	0,4687,5098,7276,8279,13358,15325,17418,17925,26666,31150,32440,36177,37909,41355,44793,45793,57834,59956,80201,
chr1	109852195	109935966	TCONS_00002574	0	-	109852195	109935966	255,0,0	20	4484,124,107,109,117,190,191,169,103,107,156,145,131,50,74,165,103,74,60,318,	0,4687,5098,7276,8279,13358,15325,17418,17925,26666,31150,32440,36177,37909,41355,44793,45793,57834,59956,83453,
chr1	109852195	109940520	TCONS_00002576	0	-	109852195	109940520	255,0,0	20	4484,124,107,109,117,190,191,169,103,107,156,145,128,50,74,165,103,74,60,312,	0,4687,5098,7276,8279,13358,15325,17418,17925,26666,31150,32440,36177,37909,41355,44793,45793,57834,59956,88013,
chr1	109852195	109940564	TCONS_00002577	0	-	109852195	109940564	255,0,0	20	4484,124,107,109,117,190,191,169,103,107,156,145,131,50,74,165,103,74,60,356,	0,4687,5098,7276,8279,13358,15325,17418,17925,26666,31150,32440,36177,37909,41355,44793,45793,57834,59956,88013,
chr1	109944474	109969477	TCONS_00002578	0	-	109944474	109969477	255,0,0	9	238,87,103,59,108,68,127,67,554,	0,8075,9158,10024,10224,11215,13384,20007,24449,
chr1	110943760	110950320	TCONS_00002580	0	-	110943760	110950320	255,0,0	4	445,118,62,113,	0,2780,5179,6447,
chr1	111195788	111217402	TCONS_00002582	0	-	111195788	111217402	255,0,0	3	6420,122,3305,	0,15056,18309,
chr1	111210748	111217368	TCONS_00002586	0	-	111210748	111217368	255,0,0	3	218,60,3271,	0,1643,3349,
chr1	111212720	111217720	TCONS_00002588	0	-	111212720	111217720	255,0,0	1	5000,	0,
chr1	111488061	111506649	TCONS_00002589	0	-	111488061	111506649	255,0,0	3	2960,273,407,	0,4411,18181,
chr1	111488061	111506677	TCONS_00002590	0	-	111488061	111506677	255,0,0	4	2960,273,1528,435,	0,4411,5848,18181,
chr1	111658709	111682792	TCONS_00002592	0	-	111658709	111682792	255,0,0	10	2180,93,83,178,140,68,145,64,214,133,	0,2717,3789,4428,8654,10139,15336,21435,23413,23950,
chr1	111658709	111682939	TCONS_00002595	0	-	111658709	111682939	255,0,0	10	2180,93,83,178,140,68,145,64,166,280,	0,2717,3789,4428,8654,10139,15336,21435,23413,23950,
chr1	111658709	111682982	TCONS_00002596	0	-	111658709	111682982	255,0,0	10	2180,93,83,178,140,68,145,64,211,323,	0,2717,3789,4428,8654,10139,15336,21435,23413,23950,
chr1	111722251	111742824	TCONS_00002599	0	-	111722251	111742824	255,0,0	13	135,90,673,240,85,42,178,149,141,78,70,113,580,	0,4624,7379,8501,9072,9582,12510,14948,16286,17546,18290,19000,19993,
chr1	111981700	111991888	TCONS_00002604	0	-	111981700	111991888	255,0,0	10	2311,69,109,72,55,71,50,142,186,212,	0,2946,3574,4244,4788,4975,8016,8356,9540,9976,
chr1	112025558	112046300	TCONS_00002605	0	-	112025558	112046300	255,0,0	7	821,101,67,348,107,1106,674,	0,2803,3649,5740,7719,16514,20068,
chr1	112025558	112047684	TCONS_00002606	0	-	112025558	112047684	255,0,0	6	821,101,67,348,107,208,	0,2803,3649,5740,7719,21918,
chr1	112042061	112046491	TCONS_00002607	0	-	112042061	112046491	255,0,0	2	1117,865,	0,3565,
chr1	112042061	112047684	TCONS_00002608	0	-	112042061	112047684	255,0,0	2	1117,208,	0,5415,
chr1	113242513	113249759	TCONS_00002610	0	-	113242513	113249759	255,0,0	5	1822,131,121,163,60,	0,2671,3107,3752,7186,
chr1	113242513	113249897	TCONS_00002611	0	-	113242513	113249897	255,0,0	6	1822,131,121,163,69,198,	0,2671,3107,3752,5208,7186,
chr1	113454474	113471975	TCONS_00002612	0	-	113454474	113471975	255,0,0	4	2313,867,144,262,	0,5325,10137,17239,
chr1	113454474	113499015	TCONS_00002613	0	-	113454474	113499015	255,0,0	5	2313,867,144,261,359,	0,5325,10137,17239,44182,
chr1	114304333	114354899	TCONS_00002617	0	-	114304333	114354899	255,0,0	7	4742,109,168,143,138,674,568,	0,5387,6510,15498,15959,35651,49998,
chr1	114356253	114414348	TCONS_00002618	0	-	114356253	114414348	255,0,0	21	1338,78,31,116,81,28,131,84,818,77,87,78,67,143,60,72,39,96,77,109,190,	0,5945,11510,15960,16317,19479,20677,21278,23958,24912,34908,38395,40839,41275,42750,42916,44106,44846,45370,45720,57905,
chr1	114935416	115053559	TCONS_00002621	0	-	114935416	115053559	255,0,0	19	5066,153,75,124,350,160,64,133,201,165,275,118,147,115,117,133,145,119,388,	0,6662,8594,9965,12615,14146,15882,17389,28641,31796,32654,34382,34953,38003,40822,70309,70617,71475,117755,
chr1	114935416	115053718	TCONS_00002622	0	-	114935416	115053718	255,0,0	20	5066,51,153,75,124,350,160,64,133,201,165,275,118,147,115,117,133,145,119,547,	0,5145,6662,8594,9965,12615,14146,15882,17389,28641,31796,32654,34382,34953,38003,40822,70309,70617,71475,117755,
chr1	115109534	115124227	TCONS_00002623	0	-	115109534	115124227	255,0,0	7	1343,81,51,162,71,93,108,	0,3078,3786,8676,9774,14385,14585,
chr1	115259490	115300662	TCONS_00002625	0	-	115259490	115300662	255,0,0	19	1347,133,164,179,120,113,176,108,165,141,213,126,129,82,98,110,199,387,117,	0,1743,2709,3669,7013,8351,9341,10113,13388,13638,15734,16862,17119,17572,19888,21093,22822,32951,41055,
chr1	115312097	115323291	TCONS_00002626	0	-	115312097	115323291	255,0,0	5	4896,114,143,106,222,	0,6869,9665,10633,10972,
chr1	117057093	117113729	TCONS_00002627	0	-	117057093	117113729	255,0,0	6	351,37,78,264,294,205,	0,4759,7434,21493,29839,56431,
chr1	120131093	120190776	TCONS_00002631	0	-	120131093	120190776	255,0,0	4	47,476,263,83,	0,35170,37404,59600,
chr1	120152405	120168765	TCONS_00002632	0	-	120152405	120168765	255,0,0	2	14334,268,	0,16092,
chr1	120453467	120572611	TCONS_00002636	0	-	120453467	120572611	255,0,0	33	5850,98,148,302,169,97,211,143,348,506,113,237,133,185,154,202,229,153,120,114,146,193,111,234,114,114,189,156,234,123,336,260,83,	0,6820,7561,8467,9384,10868,11391,11791,12792,14460,15654,18131,24627,26437,27012,29710,30681,37569,38162,39879,42698,44195,48547,52729,54608,55531,56588,57232,58666,76115,86152,94484,119061,
chr1	120453467	120612230	TCONS_00002638	0	-	120453467	120612230	255,0,0	34	5850,98,148,302,169,97,211,143,348,506,113,237,133,185,154,202,229,153,120,114,146,193,111,234,114,114,189,156,234,123,336,260,82,283,	0,6820,7561,8467,9384,10868,11391,11791,12792,14460,15654,18131,24627,26437,27012,29710,30681,37569,38162,39879,42698,44195,48547,52729,54608,55531,56588,57232,58666,76115,86152,94484,119061,158480,
chr1	144300525	144340768	TCONS_00002643	0	-	144300525	144340768	255,0,0	3	230,347,243,	0,664,40000,
chr1	144300525	144341891	TCONS_00002644	0	-	144300525	144341891	255,0,0	2	1011,1366,	0,40000,
chr1	144676482	144679972	TCONS_00002646	0	-	144676482	144679972	255,0,0	3	567,124,80,	0,756,3410,
chr1	144851192	145039975	TCONS_00002653	0	-	144851192	145039975	255,0,0	46	1307,47,139,144,227,117,240,125,190,120,132,252,153,224,52,236,529,120,193,106,233,89,264,113,138,117,92,82,165,195,180,138,114,159,213,93,120,132,118,176,124,77,111,152,56,386,	0,2972,3325,4547,5623,6419,8566,12125,12942,14617,15399,16728,22684,23488,24784,25843,27842,29549,30237,31583,34904,41308,51748,53432,54866,55228,58676,60689,60937,64252,65377,66306,66626,67640,70642,70994,71326,72497,95432,101008,101373,104023,143398,164667,169919,188397,
chr1	144851192	145039996	TCONS_00002656	0	-	144851192	145039996	255,0,0	45	1307,47,139,144,227,117,125,190,120,132,252,153,224,52,236,529,117,193,436,233,89,128,113,138,117,92,82,165,195,180,138,114,159,213,93,120,132,118,176,124,77,111,152,56,407,	0,2972,3325,4547,5623,6419,12125,12942,14617,15399,16728,22684,23488,24784,25843,27842,29549,30237,31253,34904,41308,51884,53432,54866,55228,58676,60689,60937,64252,65377,66306,66626,67640,70642,70994,71326,72497,95432,101008,101373,104023,143398,164667,169919,188397,
chr1	144851192	145040013	TCONS_00002657	0	-	144851192	145040013	255,0,0	45	1307,47,139,144,227,117,125,190,120,132,252,153,224,52,236,529,117,193,106,233,89,128,113,138,117,92,82,165,195,180,138,114,159,213,93,120,132,118,176,124,77,111,152,56,424,	0,2972,3325,4547,5623,6419,12125,12942,14617,15399,16728,22684,23488,24784,25843,27842,29549,30237,31583,34904,41308,51884,53432,54866,55228,58676,60689,60937,64252,65377,66306,66626,67640,70642,70994,71326,72497,95432,101008,101373,104023,143398,164667,169919,188397,
chr1	144851192	145040038	TCONS_00002658	0	-	144851192	145040038	255,0,0	45	1307,47,139,144,227,117,125,190,120,132,252,153,224,52,236,529,120,193,106,233,89,128,113,138,117,92,82,165,195,180,138,114,159,213,93,120,132,118,176,124,77,111,152,56,449,	0,2972,3325,4547,5623,6419,12125,12942,14617,15399,16728,22684,23488,24784,25843,27842,29549,30237,31583,34904,41308,51884,53432,54866,55228,58676,60689,60937,64252,65377,66306,66626,67640,70642,70994,71326,72497,95432,101008,101373,104023,143398,164667,169919,188397,
chr1	145456234	145473642	TCONS_00002661	0	-	145456234	145473642	255,0,0	9	489,114,74,57,69,130,167,164,128,	0,756,1001,1313,1700,3417,3862,14087,17280,
chr1	145590350	145611311	TCONS_00002662	0	-	145590350	145611311	255,0,0	16	2421,150,50,102,151,61,52,81,93,105,89,186,104,39,167,568,	0,3688,4594,4768,6553,7163,7893,8185,11179,11397,15924,17757,18053,18270,18839,20393,
chr1	145590350	145611723	TCONS_00002663	0	-	145590350	145611723	255,0,0	15	2421,150,50,102,151,61,52,81,93,105,89,186,256,167,980,	0,3688,4594,4768,6553,7163,7893,8185,11179,11397,15924,17757,18053,18839,20393,
chr1	147574433	147576927	TCONS_00002668	0	-	147574433	147576927	255,0,0	2	1756,108,	0,2386,
chr1	148006377	148014249	TCONS_00002672	0	-	148006377	148014249	255,0,0	11	21,52,173,52,173,52,173,109,173,52,169,	0,661,1422,2195,2966,3735,4506,5302,6125,6942,7703,
chr1	149590741	149591764	TCONS_00002681	0	-	149590741	149591764	255,0,0	2	232,178,	0,845,
chr1	149777441	149814974	TCONS_00002682	0	-	149777441	149814974	255,0,0	3	6424,280,1087,	0,7582,36446,
chr1	149777441	149815896	TCONS_00002683	0	-	149777441	149815896	255,0,0	2	7862,2009,	0,36446,
chr1	149856007	149858220	TCONS_00002685	0	-	149856007	149858220	255,0,0	1	2213,	0,
chr1	150190722	150208844	TCONS_00002686	0	-	150190722	150208844	255,0,0	7	2341,55,188,166,123,150,764,	0,4789,8217,10682,12183,13392,17358,
chr1	150237139	150239605	TCONS_00002687	0	-	150237139	150239605	255,0,0	2	1917,131,	0,2335,
chr1	150237139	150241444	TCONS_00002690	0	-	150237139	150241444	255,0,0	7	1455,124,128,123,74,171,474,	0,1793,2335,2616,2976,3217,3831,
chr1	150237139	150242034	TCONS_00002696	0	-	150237139	150242034	255,0,0	7	1917,128,123,74,171,560,238,	0,2335,2616,2976,3217,3958,4657,
chr1	150546937	150552131	TCONS_00002703	0	-	150546937	150552131	255,0,0	3	3030,248,813,	0,3782,4381,
chr1	150593819	150602090	TCONS_00002705	0	-	150593819	150602090	255,0,0	3	4465,126,201,	0,6123,8070,
chr1	150593819	150602097	TCONS_00002706	0	-	150593819	150602097	255,0,0	4	1516,167,126,208,	0,4298,6123,8070,
chr1	150702469	150738391	TCONS_00002708	0	-	150702469	150738391	255,0,0	8	3152,103,166,228,150,123,127,218,	0,17783,20012,21787,25007,27864,34644,35704,
chr1	150768609	150782000	TCONS_00002709	0	-	150768609	150782000	255,0,0	9	765,106,166,219,156,123,121,112,546,	0,3034,3410,7887,9727,9968,10552,12080,12845,
chr1	150768609	150849096	TCONS_00002710	0	-	150768609	150849096	255,0,0	30	765,106,166,219,156,123,121,112,404,167,163,148,103,121,73,111,152,75,135,77,86,66,103,214,214,45,45,45,112,78,	0,3034,3410,7887,9727,9968,10552,12080,15573,17038,17943,20125,20654,20948,21227,21786,27060,30409,32959,33770,35684,36200,38404,40146,43307,46290,50129,56628,62215,80409,
chr1	150768609	150849166	TCONS_00002711	0	-	150768609	150849166	255,0,0	30	765,106,166,219,156,123,121,112,100,167,163,148,103,121,73,111,152,75,135,77,86,66,103,214,214,45,45,45,112,148,	0,3034,3410,7887,9727,9968,10552,12080,15877,17038,17943,20125,20654,20948,21227,21786,27060,30409,32959,33770,35684,36200,38404,40146,43307,46290,50129,56628,62215,80409,
chr1	150782266	150849167	TCONS_00002713	0	-	150782266	150849167	255,0,0	21	2320,167,163,148,103,121,73,111,152,75,135,77,86,66,103,214,214,45,45,112,149,	0,3381,4286,6468,6997,7291,7570,8129,13403,16752,19302,20113,22027,22543,24747,26489,29650,36472,42971,48558,66752,
chr1	150937478	150947215	TCONS_00002715	0	-	150937478	150947215	255,0,0	11	1286,154,107,129,93,51,58,119,118,174,121,	0,1473,1753,2071,2389,2661,2817,3080,3392,3915,9616,
chr1	151022910	151032109	TCONS_00002723	0	-	151022910	151032109	255,0,0	5	2893,91,111,317,155,	0,3796,4581,5242,9044,
chr1	151148275	151162692	TCONS_00002727	0	-	151148275	151162692	255,0,0	6	1232,145,177,115,153,212,	0,2201,8517,9706,9998,14205,
chr1	151263177	151300166	TCONS_00002730	0	-	151263177	151300166	255,0,0	13	2332,121,133,266,124,105,110,228,228,45,937,202,420,	0,3316,3707,8106,11142,11492,12839,15434,16872,19509,24871,35470,36569,
chr1	151263177	151300174	TCONS_00002732	0	-	151263177	151300174	255,0,0	13	2332,121,133,266,124,105,110,228,228,937,173,202,428,	0,3316,3707,8106,11142,11492,12839,15434,16872,24871,34043,35470,36569,
chr1	151263177	151300184	TCONS_00002733	0	-	151263177	151300184	255,0,0	14	2332,121,133,266,124,105,110,228,228,45,937,173,202,438,	0,3316,3707,8106,11142,11492,12839,15434,16872,19509,24871,34043,35470,36569,
chr1	151263177	151300192	TCONS_00002734	0	-	151263177	151300192	255,0,0	11	2332,121,133,266,124,105,110,228,228,937,446,	0,3316,3707,8106,11142,11492,12839,15434,16872,24871,36569,
chr1	151313030	151319364	TCONS_00002737	0	-	151313030	151319364	255,0,0	11	2624,101,202,82,120,120,83,34,129,118,134,	0,2787,3126,3642,3862,4173,4551,5373,5650,5934,6200,
chr1	151313030	151319781	TCONS_00002738	0	-	151313030	151319781	255,0,0	11	2624,101,202,82,120,120,83,34,129,125,95,	0,2787,3126,3642,3862,4173,4551,5373,5650,5927,6656,
chr1	151375205	151431558	TCONS_00002745	0	-	151375205	151431558	255,0,0	19	3735,25,113,57,141,173,135,147,101,155,338,107,219,291,109,176,159,125,43,	0,3877,4181,4505,5370,5679,5964,8895,9566,20667,21219,22225,25093,25393,26873,27936,38198,39351,56310,
chr1	151375205	151431743	TCONS_00002746	0	-	151375205	151431743	255,0,0	18	3735,25,113,57,141,173,135,147,101,155,338,107,219,291,109,176,125,116,	0,3877,4181,4505,5370,5679,5964,8895,9566,20667,21219,22225,25093,25393,26873,27936,39351,56422,
chr1	151732138	151756383	TCONS_00002748	0	-	151732138	151756383	255,0,0	20	519,84,102,51,125,157,175,92,97,102,152,65,173,161,322,140,190,107,151,284,	0,1153,1788,2442,2713,3327,3664,14750,15047,15402,15729,16157,16433,16776,19022,19440,20288,21818,23236,23961,
chr1	151732138	151762961	TCONS_00002749	0	-	151732138	151762961	255,0,0	22	519,84,102,51,125,157,175,106,2216,92,97,102,152,65,173,161,322,140,190,107,151,106,	0,1153,1788,2442,2713,3327,3664,8475,8684,14750,15047,15402,15729,16157,16433,16776,19022,19440,20288,21818,23236,30717,
chr1	151743585	151762957	TCONS_00002755	0	-	151743585	151762957	255,0,0	13	3395,97,102,152,65,173,161,322,140,190,107,151,83,	0,3600,3955,4282,4710,4986,5329,7575,7993,8841,10371,11789,19289,
chr1	151955389	151966412	TCONS_00002759	0	-	151955389	151966412	255,0,0	3	411,153,185,	0,3185,10838,
chr1	152004874	152009525	TCONS_00002760	0	-	152004874	152009525	255,0,0	3	425,153,137,	0,1249,4514,
chr1	153362508	153363613	TCONS_00002761	0	-	153362508	153363613	255,0,0	3	211,163,97,	0,362,1008,
chr1	153506973	153508898	TCONS_00002762	0	-	153506973	153508898	255,0,0	3	333,159,474,	0,704,1451,
chr1	153516026	153518422	TCONS_00002763	0	-	153516026	153518422	255,0,0	3	373,156,194,	0,1103,2202,
chr1	153633618	153643531	TCONS_00002769	0	-	153633618	153643531	255,0,0	14	1414,91,115,62,88,79,117,66,103,78,105,43,60,138,	0,1562,1876,2072,2900,3253,4077,4520,6412,6857,7310,8693,9028,9775,
chr1	153901886	153917739	TCONS_00002776	0	-	153901886	153917739	255,0,0	23	1032,65,166,118,237,136,170,123,820,205,129,207,127,140,146,668,176,145,59,67,1262,340,129,	0,1128,1281,1536,2793,3231,3450,3786,4072,5349,6649,7131,8077,8313,9489,10178,11020,11493,11820,11963,12458,14647,15724,
chr1	153901886	153918334	TCONS_00002778	0	-	153901886	153918334	255,0,0	29	1032,65,166,118,237,136,170,123,389,168,205,129,207,127,140,146,216,101,176,145,59,67,245,170,70,253,340,169,33,	0,1128,1281,1536,2793,3231,3450,3786,4072,4724,5349,6649,7131,8077,8313,9489,10178,10745,11020,11493,11820,11963,12458,12776,13145,13467,14647,15724,16415,
chr1	153901886	153918353	TCONS_00002779	0	-	153901886	153918353	255,0,0	29	1032,65,166,118,237,136,170,123,389,168,205,129,207,127,140,146,216,101,176,145,59,67,245,170,70,253,340,149,52,	0,1128,1281,1536,2793,3231,3450,3786,4072,4724,5349,6649,7131,8077,8313,9489,10178,10745,11020,11493,11820,11963,12458,12776,13145,13467,14647,15724,16415,
chr1	153901886	153919346	TCONS_00002784	0	-	153901886	153919346	255,0,0	28	1032,65,166,118,237,136,170,123,389,168,205,129,207,127,140,146,216,101,176,145,59,67,245,170,70,253,340,51,	0,1128,1281,1536,2793,3231,3450,3786,4072,4724,5349,6649,7131,8077,8313,9489,10178,10745,11020,11493,11820,11963,12458,12776,13145,13467,14647,17409,
chr1	153920161	153930997	TCONS_00002787	0	-	153920161	153930997	255,0,0	14	644,187,270,407,245,50,65,30,104,69,54,152,102,177,	0,772,1429,3574,4332,4711,4885,5119,5580,5852,6569,7152,7379,10659,
chr1	153920161	153931307	TCONS_00002788	0	-	153920161	153931307	255,0,0	14	644,187,270,407,245,50,65,30,104,69,62,117,102,487,	0,772,1429,3574,4332,4711,4885,5119,5580,5852,6569,7187,7379,10659,
chr1	153931586	153935284	TCONS_00002789	0	-	153931586	153935284	255,0,0	3	1644,131,280,	0,3109,3418,
chr1	153931586	153939351	TCONS_00002792	0	-	153931586	153939351	255,0,0	5	1644,131,219,209,38,	0,3109,3418,4384,7727,
chr1	153946346	153958838	TCONS_00002798	0	-	153946346	153958838	255,0,0	13	965,80,83,38,847,138,54,66,90,78,61,61,250,	0,1955,2822,3105,3299,8168,8520,8664,8848,9348,9650,10850,12242,
chr1	153953640	153958839	TCONS_00002801	0	-	153953640	153958839	255,0,0	8	1012,54,66,90,78,61,61,251,	0,1226,1370,1554,2054,2356,3556,4948,
chr1	154179170	154193141	TCONS_00002802	0	-	154179170	154193141	255,0,0	5	954,59,167,118,324,	0,5625,5763,7762,13647,
chr1	154179170	154193253	TCONS_00002803	0	-	154179170	154193253	255,0,0	7	954,59,167,54,118,102,436,	0,5625,5763,7198,7762,13141,13647,
chr1	154179170	154193255	TCONS_00002804	0	-	154179170	154193255	255,0,0	6	954,59,167,54,118,438,	0,5625,5763,7198,7762,13647,
chr1	154522458	154530948	TCONS_00002805	0	-	154522458	154530948	255,0,0	13	487,67,96,49,59,91,61,85,141,51,105,105,246,	0,955,1414,1788,1938,2110,2421,2753,3049,4752,5445,5877,8244,
chr1	154554470	154580700	TCONS_00002808	0	-	154554470	154580700	255,0,0	15	3049,128,113,183,134,123,94,172,148,191,145,149,184,1586,233,	0,3222,3758,4186,6130,6556,7374,7762,8267,14810,15128,15833,16407,19046,25997,
chr1	154554470	154600407	TCONS_00002813	0	-	154554470	154600407	255,0,0	15	3049,128,113,183,134,123,94,172,148,191,145,149,184,1586,77,	0,3222,3758,4186,6130,6556,7374,7762,8267,14810,15128,15833,16407,19046,45860,
chr1	154554470	154600467	TCONS_00002815	0	-	154554470	154600467	255,0,0	16	3049,128,113,183,134,123,94,172,226,191,145,149,184,1208,242,38,	0,3222,3758,4186,6130,6556,7374,7762,8189,14810,15128,15833,16407,19046,20390,45959,
chr1	154554470	154600476	TCONS_00002817	0	-	154554470	154600476	255,0,0	15	3049,128,113,183,134,123,94,172,226,191,145,149,184,1586,47,	0,3222,3758,4186,6130,6556,7374,7762,8189,14810,15128,15833,16407,19046,45959,
chr1	154897111	154909453	TCONS_00002818	0	-	154897111	154909453	255,0,0	5	630,130,153,64,387,	0,1718,4388,7716,11955,
chr1	154916547	154928665	TCONS_00002819	0	-	154916547	154928665	255,0,0	11	1046,1232,132,71,24,234,166,65,127,87,121,	0,1500,3345,3570,3910,4061,7160,7399,7723,9599,11997,
chr1	154934708	154946917	TCONS_00002824	0	-	154934708	154946917	255,0,0	13	1699,239,132,70,199,127,52,54,120,64,71,168,194,	0,3310,3713,3929,4086,5438,5747,5971,6262,6538,7145,7799,12015,
chr1	154934708	154948239	TCONS_00002827	0	-	154934708	154948239	255,0,0	14	1699,239,135,70,199,127,52,54,120,64,71,168,107,36,	0,3310,3713,3929,4086,5438,5747,5971,6262,6538,7145,7799,12015,13495,
chr1	155112369	155113011	TCONS_00002829	0	-	155112369	155113011	255,0,0	2	378,45,	0,597,
chr1	155112369	155113149	TCONS_00002830	0	-	155112369	155113149	255,0,0	2	352,183,	0,597,
chr1	155141877	155145510	TCONS_00002831	0	-	155141877	155145510	255,0,0	4	159,67,64,297,	0,389,3163,3336,
chr1	155141877	155151370	TCONS_00002833	0	-	155141877	155151370	255,0,0	6	159,67,64,155,159,123,	0,389,3163,3336,3819,9370,
chr1	155158301	155161599	TCONS_00002836	0	-	155158301	155161599	255,0,0	6	384,150,122,137,56,961,	0,1399,1629,1896,2182,2337,
chr1	74663934	74667171	TCONS_00002841_add	0	+	74663934	74667171	255,0,0	3	110,182,170,	0,1413,3067,
chr1	74663939	74667171	TCONS_00002844_add	0	+	74663939	74667171	255,0,0	3	105,168,170,	0,1408,3062,
chr1	155201072	155211065	TCONS_00002851	0	-	155201072	155211065	255,0,0	11	3819,117,164,225,238,173,134,147,192,88,189,	0,3913,4399,4963,6059,6852,7235,8334,8604,9348,9804,
chr1	155216889	155232140	TCONS_00002854	0	-	155216889	155232140	255,0,0	20	857,254,69,546,70,100,173,108,120,111,57,507,118,102,160,129,121,123,78,264,	0,951,1306,3177,3996,4403,4634,6526,6760,6985,7301,8814,9575,10186,10399,11727,13231,13438,14558,14987,
chr1	155216889	155232172	TCONS_00002855	0	-	155216889	155232172	255,0,0	19	857,254,69,546,70,100,173,108,120,111,57,1767,118,102,160,129,121,123,296,	0,951,1306,3177,3996,4403,4634,6526,6760,6985,7301,7554,9575,10186,10399,11727,13231,13438,14987,
chr1	155216889	155243092	TCONS_00002857	0	-	155216889	155243092	255,0,0	32	857,254,69,546,70,100,173,108,120,67,507,118,102,160,129,121,123,78,262,136,91,80,83,130,95,167,117,67,85,229,170,101,	0,951,1306,3177,3996,4403,4634,6526,6760,6985,8814,9575,10186,10399,11727,13231,13438,14558,14987,16474,16851,17122,17369,17546,18761,19630,20911,21194,21609,22389,23709,26102,
chr1	155232605	155243129	TCONS_00002861	0	-	155232605	155243129	255,0,0	11	586,91,80,83,130,95,167,117,1424,170,138,	0,1135,1406,1653,1830,3045,3914,5195,5478,7993,10386,
chr1	155232605	155243138	TCONS_00002862	0	-	155232605	155243138	255,0,0	13	586,91,80,83,130,95,167,117,67,88,226,170,147,	0,1135,1406,1653,1830,3045,3914,5195,5478,5893,6673,7993,10386,
chr1	155232605	155243138	TCONS_00002863	0	-	155232605	155243138	255,0,0	13	586,91,80,83,130,95,167,117,67,85,229,170,147,	0,1135,1406,1653,1830,3045,3914,5195,5478,5893,6673,7993,10386,
chr1	155304971	155491412	TCONS_00002865	0	-	155304971	155491412	255,0,0	27	2571,302,41,167,173,139,91,87,249,133,55,153,158,95,165,109,147,207,109,46,74,95,180,742,102,4564,522,	0,2908,4147,6755,8133,8423,9002,11202,12475,14146,14361,17525,19292,22135,22404,25120,35323,35596,43100,43322,44862,60278,80563,103146,124616,142705,185919,
chr1	155304971	155532260	TCONS_00002866	0	-	155304971	155532260	255,0,0	28	2571,302,41,167,173,139,91,87,249,133,55,153,158,95,165,109,147,207,109,46,74,95,180,742,102,4564,519,317,	0,2908,4147,6755,8133,8423,9002,11202,12475,14146,14361,17525,19292,22135,22404,25120,35323,35596,43100,43322,44862,60278,80563,103146,124616,142705,185919,226972,
chr1	155304971	155532617	TCONS_00002867	0	-	155304971	155532617	255,0,0	28	2571,302,41,167,173,139,91,87,249,133,55,153,158,95,165,109,147,207,109,46,74,95,180,742,102,4564,519,48,	0,2908,4147,6755,8133,8423,9002,11202,12475,14146,14361,17525,19292,22135,22404,25120,35323,35596,43100,43322,44862,60278,80563,103146,124616,142705,185919,227598,
chr1	155604510	155607387	TCONS_00002868	0	-	155604510	155607387	255,0,0	2	127,203,	0,2674,
chr1	155629131	155658505	TCONS_00002876	0	-	155629131	155658505	255,0,0	11	1573,117,151,145,172,87,199,104,41,131,56,	0,1966,9286,10979,13219,15669,17207,20068,21075,28730,29318,
chr1	155629131	155658795	TCONS_00002880	0	-	155629131	155658795	255,0,0	11	1573,117,91,145,172,87,199,104,41,131,75,	0,1966,9286,10979,13219,15669,17207,20068,21075,28730,29589,
chr1	155882595	155904182	TCONS_00002883	0	-	155882595	155904182	255,0,0	14	1516,92,113,174,254,58,61,212,164,53,80,129,217,56,	0,3068,3820,4694,8570,9056,10822,12827,13871,14299,16491,16907,20828,21531,
chr1	155882595	155904211	TCONS_00002884	0	-	155882595	155904211	255,0,0	14	1516,92,85,174,254,58,61,212,164,53,80,129,217,85,	0,3068,3820,4694,8570,9056,10822,12827,13871,14299,16491,16907,20828,21531,
chr1	155916254	155948346	TCONS_00002885	0	-	155916254	155948346	255,0,0	22	1552,214,444,51,36,68,120,201,68,170,77,249,118,126,251,141,110,130,64,68,145,191,	0,3805,4365,5019,5277,5455,5652,6164,8438,11249,11856,15197,15641,16129,16469,18524,18839,19167,19952,20356,22692,31901,
chr1	155916254	155948366	TCONS_00002886	0	-	155916254	155948366	255,0,0	22	1552,184,444,51,36,68,120,201,68,170,77,249,118,126,251,141,110,130,64,68,145,211,	0,3835,4365,5019,5277,5455,5652,6164,8438,11249,11856,15197,15641,16129,16469,18524,18839,19167,19952,20356,22692,31901,
chr1	155916254	155948433	TCONS_00002887	0	-	155916254	155948433	255,0,0	22	1552,184,444,51,36,68,120,201,68,170,77,249,118,126,251,144,110,130,64,68,145,278,	0,3835,4365,5019,5277,5455,5652,6164,8438,11249,11856,15197,15641,16129,16469,18524,18839,19167,19952,20356,22692,31901,
chr1	155978734	155990772	TCONS_00002894	0	-	155978734	155990772	255,0,0	6	707,78,109,99,155,94,	0,2866,6017,9326,11069,11944,
chr1	156005005	156023521	TCONS_00002895	0	-	156005005	156023521	255,0,0	11	1916,187,116,84,140,226,159,263,218,152,137,	0,6270,6657,6938,7559,8783,13286,15076,15895,16491,18379,
chr1	156218801	156251885	TCONS_00002896	0	-	156218801	156251885	255,0,0	22	1660,139,75,91,160,60,159,176,76,176,600,138,209,69,126,79,90,90,157,124,99,302,	0,1847,2392,3403,3908,4438,9994,11440,12322,14384,16770,17530,18459,19104,19279,23309,24350,25586,28074,28914,29925,32782,
chr1	156218801	156252853	TCONS_00002897	0	-	156218801	156252853	255,0,0	22	1660,139,75,91,160,60,159,176,76,176,600,138,209,69,126,79,90,90,157,124,99,456,	0,1847,2392,3403,3908,4438,9994,11440,12322,14384,16770,17530,18459,19104,19279,23309,24350,25586,28074,28914,29925,33596,
chr1	156260617	156265472	TCONS_00002898	0	-	156260617	156265472	255,0,0	7	280,1807,257,219,201,258,156,	0,576,2493,3191,3538,3932,4699,
chr1	156260980	156265464	TCONS_00002899	0	-	156260980	156265464	255,0,0	6	2020,257,219,201,258,148,	0,2130,2828,3175,3569,4336,
chr1	156278653	156308106	TCONS_00002901	0	-	156278653	156308106	255,0,0	14	441,132,246,181,82,133,150,187,118,97,63,51,62,162,	0,1695,2087,3178,8303,8552,10005,11976,16109,24684,25850,26005,26964,29291,
chr1	156433523	156470677	TCONS_00002902	0	-	156433523	156470677	255,0,0	11	3925,307,241,130,191,57,211,138,204,192,400,	0,4261,5048,11376,13280,15558,15854,17102,18705,19507,36754,
chr1	156563706	156571386	TCONS_00002904	0	-	156563706	156571386	255,0,0	8	1935,51,92,87,93,74,137,186,	0,2166,2472,4120,4312,4506,5053,7494,
chr1	156669400	156675423	TCONS_00002905	0	-	156669400	156675423	255,0,0	4	468,117,179,255,	0,933,1265,5768,
chr1	156669400	156675549	TCONS_00002906	0	-	156669400	156675549	255,0,0	5	468,117,179,210,49,	0,933,1265,5768,6100,
chr1	156707061	156711024	TCONS_00002909	0	-	156707061	156711024	255,0,0	6	265,131,104,96,243,221,	0,376,761,1073,1252,3742,
chr1	156707061	156711073	TCONS_00002910	0	-	156707061	156711073	255,0,0	6	265,131,104,96,243,229,	0,376,761,1073,1252,3783,
chr1	156711902	156721503	TCONS_00002911	0	-	156711902	156721503	255,0,0	6	1345,227,186,139,77,369,	0,1541,2052,2897,3186,9232,
chr1	156711902	156722195	TCONS_00002913	0	-	156711902	156722195	255,0,0	6	1345,227,186,139,77,175,	0,1541,2052,2897,3186,10118,
chr1	156775869	156786625	TCONS_00002914	0	-	156775869	156786625	255,0,0	9	496,171,288,147,169,90,185,89,159,	0,1097,3125,3583,7770,8127,8959,9928,10597,
chr1	156904632	156912592	TCONS_00002915	0	-	156904632	156912592	255,0,0	8	1218,190,248,1493,219,62,126,111,	0,1975,2408,3577,5366,6531,7023,7849,
chr1	156904632	156933579	TCONS_00002916	0	-	156904632	156933579	255,0,0	31	1218,190,248,96,137,363,219,62,126,91,168,76,179,118,126,80,147,188,48,180,127,30,97,145,24,123,97,43,99,102,268,	0,1975,2408,3577,4308,4707,5366,6531,7023,7849,9094,9517,10178,11204,11821,12095,12463,12928,13340,13478,16732,20051,20862,21579,22951,23901,24205,25577,26836,28362,28679,
chr1	156904632	156933678	TCONS_00002917	0	-	156904632	156933678	255,0,0	31	1218,190,248,96,363,219,62,126,91,168,76,179,118,126,80,147,188,48,180,127,30,97,145,24,123,97,43,99,102,75,195,	0,1975,2408,3577,4707,5366,6531,7023,7849,9094,9517,10178,11204,11821,12095,12463,12928,13340,13478,16732,20051,20862,21579,22951,23901,24205,25577,26836,28362,28679,28851,
chr1	156904632	157015427	TCONS_00002918	0	-	156904632	157015427	255,0,0	40	1218,190,248,96,363,219,62,126,91,168,76,179,118,126,80,147,188,48,180,127,30,97,145,24,123,97,43,99,102,75,138,77,46,72,179,58,50,99,92,1337,	0,1975,2408,3577,4707,5366,6531,7023,7849,9094,9517,10178,11204,11821,12095,12463,12928,13340,13478,16732,20051,20862,21579,22951,23901,24205,25577,26836,28362,28679,33146,34441,35157,42142,43363,44388,45596,49498,51241,109458,
chr1	156904632	157015745	TCONS_00002919	0	-	156904632	157015745	255,0,0	41	1218,190,248,96,363,219,62,126,91,168,76,179,118,126,80,147,188,48,180,127,30,97,145,24,123,97,43,99,102,75,138,77,46,120,72,179,58,50,99,92,1655,	0,1975,2408,3577,4707,5366,6531,7023,7849,9094,9517,10178,11204,11821,12095,12463,12928,13340,13478,16732,20051,20862,21579,22951,23901,24205,25577,26836,28362,28679,33146,34441,35157,36856,42142,43363,44388,45596,49498,51241,109458,
chr1	157090971	157107951	TCONS_00002928	0	-	157090971	157107951	255,0,0	5	4800,116,238,56,94,	0,12932,14291,15127,16886,
chr1	158161549	158173696	TCONS_00002932	0	-	158161549	158173696	255,0,0	2	8076,114,	0,12033,
chr1	158161549	158173697	TCONS_00002933	0	-	158161549	158173697	255,0,0	3	6825,143,115,	0,7933,12033,
chr1	158295471	158301318	TCONS_00002934	0	-	158295471	158301318	255,0,0	6	2576,94,279,279,267,166,	0,3239,3688,4170,5114,5681,
chr1	159029566	159046668	TCONS_00002939	0	-	159029566	159046668	255,0,0	6	2942,189,420,134,282,246,	0,3709,6133,8791,13461,16856,
chr1	159887902	159895420	TCONS_00002940	0	-	159887902	159895420	255,0,0	5	829,103,175,208,181,	0,1161,1548,2217,7337,
chr1	160061100	160068468	TCONS_00002941	0	-	160061100	160068468	255,0,0	7	298,131,414,408,462,378,270,	0,497,971,1613,2399,3558,7098,
chr1	160061100	160068653	TCONS_00002942	0	-	160061100	160068653	255,0,0	8	298,131,414,408,462,378,109,30,	0,497,971,1613,2399,3558,7098,7523,
chr1	160185505	160232324	TCONS_00002944	0	-	160185505	160232324	255,0,0	14	1993,117,120,131,108,58,73,111,95,141,674,75,74,86,	0,2608,3133,6935,8726,9346,9875,15581,21419,22891,23981,28244,45569,46733,
chr1	160245896	160254920	TCONS_00002948	0	-	160245896	160254920	255,0,0	8	3528,45,177,162,86,166,110,76,	0,3694,3963,5932,6310,6837,7423,8948,
chr1	160258389	160313325	TCONS_00002949	0	-	160258389	160313325	255,0,0	33	1617,195,162,111,187,137,69,78,110,90,124,89,96,190,147,163,139,86,140,83,76,67,151,83,136,100,110,110,77,81,74,114,405,	0,1892,2735,3219,3412,3884,4566,4786,5884,6168,7136,7461,8743,8956,10245,10502,16833,17088,17754,18563,20501,21592,23268,24485,25390,34831,36943,43848,45003,46642,51309,51581,54531,
chr1	160454511	160493035	TCONS_00002951	0	-	160454511	160493035	255,0,0	8	2033,72,83,39,111,264,333,102,	0,2382,4366,5476,5853,6403,11339,38422,
chr1	160454511	160493035	TCONS_00002952	0	-	160454511	160493035	255,0,0	8	2033,72,80,39,111,264,333,102,	0,2382,4366,5476,5853,6403,11339,38422,
chr1	160506516	160549390	TCONS_00002953	0	-	160506516	160549390	255,0,0	7	11595,63,98,120,252,342,209,	0,13190,14211,16651,17168,28677,42665,
chr1	160577898	160616094	TCONS_00002954	0	-	160577898	160616094	255,0,0	7	2690,93,74,90,285,339,291,	0,4379,11667,15987,26504,29082,37905,
chr1	160577898	160617530	TCONS_00002955	0	-	160577898	160617530	255,0,0	7	2690,93,74,90,285,339,871,	0,4379,11667,15987,26504,29082,38761,
chr1	160647935	160681613	TCONS_00002956	0	-	160647935	160681613	255,0,0	4	986,267,303,142,	0,3056,6741,33536,
chr1	160647935	160715056	TCONS_00002961	0	-	160647935	160715056	255,0,0	5	986,267,303,131,149,	0,3056,6741,33536,66972,
chr1	160964934	160991304	TCONS_00002964	0	-	160964934	160991304	255,0,0	10	3762,49,13,108,103,203,147,108,69,505,	0,3898,4251,4495,4731,5001,5486,5875,6140,25865,
chr1	160964934	161008762	TCONS_00002967	0	-	160964934	161008762	255,0,0	11	3762,49,13,108,103,203,147,108,69,103,93,	0,3898,4251,4495,4731,5001,5486,5875,6140,25865,43735,
chr1	161007332	161008838	TCONS_00002968	0	-	161007332	161008838	255,0,0	4	284,163,123,169,	0,370,1008,1337,
chr1	161009064	161015764	TCONS_00002973	0	-	161009064	161015764	255,0,0	11	735,129,95,59,88,196,102,116,50,93,117,	0,927,1301,1539,2049,2376,2841,3280,3558,3993,6583,
chr1	161009064	161015914	TCONS_00002975	0	-	161009064	161015914	255,0,0	10	735,469,59,88,196,102,85,50,93,267,	0,927,1539,2049,2376,2841,3311,3558,3993,6583,
chr1	161016666	161039768	TCONS_00002977	0	-	161016666	161039768	255,0,0	12	2458,266,402,78,104,172,128,108,83,145,103,451,	0,2547,4437,5409,5563,5749,6381,7489,7746,9511,12737,22651,
chr1	161070337	161089183	TCONS_00002979	0	-	161070337	161089183	255,0,0	4	312,124,89,1442,	0,1500,1739,17404,
chr1	161070337	161102255	TCONS_00002980	0	-	161070337	161102255	255,0,0	10	312,124,89,199,299,147,108,389,33,75,	0,1500,1739,17404,21677,22527,23291,23590,30267,31843,
chr1	161070337	161102432	TCONS_00002981	0	-	161070337	161102432	255,0,0	9	312,124,89,199,147,108,389,33,92,	0,1500,1739,17404,22527,23291,23590,30267,32003,
chr1	161090236	161102248	TCONS_00002982	0	-	161090236	161102248	255,0,0	6	2077,147,108,389,33,68,	0,2628,3392,3691,10368,11944,
chr1	161090236	161102660	TCONS_00002983	0	-	161090236	161102660	255,0,0	6	2077,147,108,389,33,320,	0,2628,3392,3691,10368,12104,
chr1	161141100	161143843	TCONS_00002984	0	-	161141100	161143843	255,0,0	4	779,105,123,195,	0,916,2294,2548,
chr1	161141100	161147555	TCONS_00002985	0	-	161141100	161147555	255,0,0	8	779,105,123,191,236,267,146,343,	0,916,2294,2548,3682,4497,5123,6112,
chr1	161511549	161520383	TCONS_00002995	0	-	161511549	161520383	255,0,0	6	1440,258,258,21,102,63,	0,2941,6661,7251,7937,8771,
chr1	161952994	161993663	TCONS_00003004	0	-	161952994	161993663	255,0,0	7	1072,177,525,226,177,264,617,	0,1599,14620,16908,23092,36714,40052,
chr1	161952994	161994184	TCONS_00003005	0	-	161952994	161994184	255,0,0	8	1072,177,525,226,177,108,264,1138,	0,1599,14620,16908,23092,34195,36714,40052,
chr1	161952994	161994322	TCONS_00003007	0	-	161952994	161994322	255,0,0	8	1072,177,525,232,177,108,264,1276,	0,1599,14620,16908,23092,34195,36714,40052,
chr1	165631401	165667847	TCONS_00003008	0	-	165631401	165667847	255,0,0	11	980,113,142,88,189,141,197,135,130,146,233,	0,2853,5144,6761,7097,17277,18322,19942,20816,33087,36213,
chr1	165688368	165738122	TCONS_00003010	0	-	165688368	165738122	255,0,0	8	44,1124,145,68,47,60,78,204,	0,7866,24035,32970,35096,40393,49060,49550,
chr1	167399876	167487903	TCONS_00003014	0	-	167399876	167487903	255,0,0	8	1107,36,57,36,81,57,104,259,	0,2384,3380,4759,7930,8704,10024,87768,
chr1	167399876	167487984	TCONS_00003015	0	-	167399876	167487984	255,0,0	8	1107,36,57,33,81,57,104,340,	0,2384,3380,4759,7930,8704,10024,87768,
chr1	167510233	167517548	TCONS_00003016	0	-	167510233	167517548	255,0,0	3	1305,185,310,	0,5104,7005,
chr1	167510233	167523376	TCONS_00003018	0	-	167510233	167523376	255,0,0	5	1305,185,120,500,42,	0,5104,7005,12391,13101,
chr1	167885916	167906822	TCONS_00003019	0	-	167885916	167906822	255,0,0	5	1681,112,85,41,1852,	0,3300,3868,7818,19054,
chr1	168510004	168513425	TCONS_00003020	0	-	168510004	168513425	255,0,0	3	354,115,284,	0,1226,3137,
chr1	169659694	169680818	TCONS_00003023	0	-	169659694	169680818	255,0,0	9	1249,19,129,186,186,108,387,82,182,	0,5981,11006,12701,14014,16788,17863,19882,20942,
chr1	169890277	170043820	TCONS_00003025	0	-	169890277	170043820	255,0,0	20	645,100,190,86,99,126,166,113,109,101,163,179,99,125,100,142,56,155,132,244,	0,32874,39909,51376,56948,60835,61565,62133,63445,71018,95325,103281,110749,113235,114317,117153,118096,125575,134168,153299,
chr1	172410436	172413228	TCONS_00003028	0	-	172410436	172413228	255,0,0	2	1534,101,	0,2691,
chr1	173007611	173020139	TCONS_00003029	0	-	173007611	173020139	255,0,0	3	3242,31,259,	0,5467,12269,
chr1	173152714	173176454	TCONS_00003030	0	-	173152714	173176454	255,0,0	3	3290,49,292,	0,4945,23448,
chr1	173832967	173837869	TCONS_00003034	0	-	173832967	173837869	255,0,0	13	246,48,23,30,54,38,38,30,40,36,53,50,48,	0,427,654,845,1399,1680,2027,2347,2698,2931,3161,4130,4854,
chr1	173832967	173837922	TCONS_00003035	0	-	173832967	173837922	255,0,0	13	246,48,23,30,54,77,38,30,40,36,53,50,31,	0,427,654,845,1399,1641,2027,2347,2698,2931,3161,4130,4924,
chr1	173832967	173837925	TCONS_00003036	0	-	173832967	173837925	255,0,0	13	246,48,23,30,54,38,38,30,40,36,53,65,34,	0,427,654,845,1399,1680,2027,2347,2698,2931,3161,4130,4924,
chr1	175126007	175162247	TCONS_00003045	0	-	175126007	175162247	255,0,0	4	4275,176,74,252,	0,9690,20739,35988,
chr1	175126007	175162387	TCONS_00003047	0	-	175126007	175162387	255,0,0	5	4275,176,74,318,20,	0,9690,20739,35768,36360,
chr1	175913795	176170455	TCONS_00003048	0	-	175913795	176170455	255,0,0	19	511,45,161,125,118,117,82,109,144,136,115,58,77,69,120,65,98,60,59,	0,2535,42283,43628,44702,82912,98526,99050,101521,136492,141116,171964,190350,204346,218209,219167,231250,239973,256601,
chr1	175913795	176176609	TCONS_00003052	0	-	175913795	176176609	255,0,0	20	511,45,161,125,118,117,82,109,144,136,115,58,77,60,69,120,77,98,60,902,	0,2535,42283,43628,44702,82912,98526,99050,101521,136492,141116,171964,190350,191828,204346,218209,219155,231250,239973,261912,
chr1	179068127	179112194	TCONS_00003054	0	-	179068127	179112194	255,0,0	12	9906,234,174,90,153,185,178,85,273,296,171,127,	0,10215,11289,13316,15885,18339,19594,21197,22602,27384,32318,43940,
chr1	179068127	179112241	TCONS_00003056	0	-	179068127	179112241	255,0,0	12	10449,174,90,153,185,178,85,273,296,171,63,174,	0,11289,13316,15885,18339,19594,21197,22602,27384,32318,34319,43940,
chr1	179068127	179198105	TCONS_00003059	0	-	179068127	179198105	255,0,0	12	10449,174,90,153,185,178,85,273,296,171,63,180,	0,11289,13316,15885,18339,19594,21197,22602,27384,32318,34319,129798,
chr1	179810053	179846942	TCONS_00003063	0	-	179810053	179846942	255,0,0	7	5910,102,519,180,419,135,115,	0,6616,9926,11713,24517,36320,36774,
chr1	179828240	179846928	TCONS_00003065	0	-	179828240	179846928	255,0,0	3	6749,135,101,	0,18133,18587,
chr1	180250488	180471760	TCONS_00003066	0	-	180250488	180471760	255,0,0	9	33,248,31,90,106,83,97,65,581,	0,6916,33338,116162,132012,148826,210915,214107,220691,
chr1	180257373	180472146	TCONS_00003068	0	-	180257373	180472146	255,0,0	8	279,31,90,106,83,97,65,967,	0,26453,109277,125127,141941,204030,207222,213806,
chr1	181056492	181059980	TCONS_00003070	0	-	181056492	181059980	255,0,0	2	514,2570,	0,918,
chr1	182352015	182361040	TCONS_00003072	0	-	182352015	182361040	255,0,0	7	1843,200,128,147,162,179,227,	0,2476,2879,3375,4250,5691,8798,
chr1	182542775	182558466	TCONS_00003073	0	-	182542775	182558466	255,0,0	7	1938,134,133,206,86,1644,165,	0,2615,7584,8412,10440,11686,15526,
chr1	183523603	183560057	TCONS_00003080	0	-	183523603	183560057	255,0,0	15	1762,178,112,152,26,76,69,142,44,60,108,135,109,83,767,	0,5627,8726,8965,9536,11235,12451,12735,14673,16311,18716,20018,23130,32426,35687,
chr1	183523603	183560095	TCONS_00003081	0	-	183523603	183560095	255,0,0	16	1762,178,112,152,26,76,69,142,44,60,108,135,109,83,204,121,	0,5627,8726,8965,9536,11235,12451,12735,14673,16311,18716,20018,23130,32426,35687,36371,
chr1	183839217	183844207	TCONS_00003082	0	-	183839217	183844207	255,0,0	2	928,29,	0,4961,
chr1	184659650	184945073	TCONS_00003084	0	-	184659650	184945073	255,0,0	34	3956,186,166,192,154,155,166,125,84,84,126,98,106,135,154,113,40,101,46,5164,112,108,111,162,188,163,105,116,168,115,132,131,539,342,	0,12294,16126,17636,19877,21206,21916,26371,27023,28645,28926,30772,33234,35738,42320,44014,46508,47094,59030,100417,107562,113068,115429,117557,128121,132650,133121,141330,194116,199591,203558,208661,283783,285081,
chr1	184757317	184944458	TCONS_00003085	0	-	184757317	184944458	255,0,0	14	7914,112,108,111,162,188,163,105,116,168,115,132,131,1025,	0,9895,15401,17762,19890,30454,34983,35454,43663,96449,101924,105891,110994,186116,
chr1	185087259	185126560	TCONS_00003086	0	-	185087259	185126560	255,0,0	15	2144,127,63,167,79,191,213,250,80,124,130,65,114,111,951,	0,2255,5729,6816,10541,19478,21239,21845,25229,25778,27311,29054,32251,33697,38350,
chr1	185263986	185286391	TCONS_00003088	0	-	185263986	185286391	255,0,0	15	3434,174,132,127,122,225,130,1090,126,174,76,170,129,228,307,	0,4855,5144,5362,5582,6117,6579,10681,12159,12634,13945,14148,14528,16240,22098,
chr1	185263986	185286403	TCONS_00003089	0	-	185263986	185286403	255,0,0	16	3434,174,132,127,122,225,130,108,141,126,174,76,170,129,228,319,	0,4855,5144,5362,5582,6117,6579,10681,11630,12159,12634,13945,14148,14528,16240,22098,
chr1	185263986	185286409	TCONS_00003090	0	-	185263986	185286409	255,0,0	13	3434,174,132,127,122,225,5706,174,76,170,129,228,325,	0,4855,5144,5362,5582,6117,6579,12634,13945,14148,14528,16240,22098,
chr1	185263986	185287235	TCONS_00003091	0	-	185263986	185287235	255,0,0	16	3434,174,132,127,122,225,130,108,126,174,76,170,129,228,391,473,	0,4855,5144,5362,5582,6117,6579,10681,12159,12634,13945,14148,14528,16240,22098,22776,
chr1	186281438	186327784	TCONS_00003093	0	-	186281438	186327784	255,0,0	39	1720,96,119,157,96,107,95,69,185,91,132,201,84,149,273,209,62,206,199,144,211,131,132,138,148,185,204,117,153,167,166,141,135,163,149,134,164,227,110,	0,2322,5175,6140,6426,8005,10011,10211,11379,13457,13797,15153,19191,19888,20815,22018,22761,23031,24189,24706,25726,27335,28721,28945,31019,31599,32068,33273,33828,34985,37916,39023,39669,41381,43103,43328,43979,45090,46236,
chr1	186281438	186344389	TCONS_00003094	0	-	186281438	186344389	255,0,0	51	1720,96,119,157,96,107,95,69,185,91,132,201,84,149,273,209,62,206,199,144,211,131,132,138,148,185,204,117,153,167,166,141,135,163,149,134,164,227,108,198,92,141,88,81,93,165,104,97,74,105,380,	0,2322,5175,6140,6426,8005,10011,10211,11379,13457,13797,15153,19191,19888,20815,22018,22761,23031,24189,24706,25726,27335,28721,28945,31019,31599,32068,33273,33828,34985,37916,39023,39669,41381,43103,43328,43979,45090,46236,47492,47966,48458,49315,49482,49981,50530,51035,55579,58663,61052,62571,
chr1	186640934	186649664	TCONS_00003097	0	-	186640934	186649664	255,0,0	10	2960,148,287,247,84,182,144,144,117,294,	0,3446,4095,4664,5030,5846,6458,7255,7519,8436,
chr1	186640934	186650636	TCONS_00003099	0	-	186640934	186650636	255,0,0	11	2960,148,287,247,84,182,144,144,117,190,801,	0,3446,4095,4664,5030,5846,6458,7255,7519,8436,8901,
chr1	192981390	193028464	TCONS_00003100	0	-	192981390	193028464	255,0,0	11	4135,99,114,103,64,131,62,126,106,64,150,	0,8836,10665,11583,15824,16918,17127,17271,37485,39493,46924,
chr1	192981390	193028592	TCONS_00003101	0	-	192981390	193028592	255,0,0	11	4135,99,111,103,64,131,62,126,106,64,278,	0,8836,10665,11583,15824,16918,17127,17271,37485,39493,46924,
chr1	197473793	197744062	TCONS_00003106	0	-	197473793	197744062	255,0,0	22	6309,217,83,108,57,69,41,91,102,126,102,46,101,111,54,81,70,120,50,44,65,201,	0,7064,8207,35300,36295,41258,42069,48358,78488,90544,102409,107267,112995,138047,141026,147571,153636,167373,169456,210367,268204,270068,
chr1	197473793	197744412	TCONS_00003110	0	-	197473793	197744412	255,0,0	23	6309,217,83,108,57,69,41,91,102,126,102,46,101,111,54,60,81,70,120,50,44,65,144,	0,7064,8207,35300,36295,41258,42069,48358,78488,90544,102409,107267,112995,138047,141026,142391,147571,153636,167373,169456,210367,268204,270475,
chr1	197473793	197744438	TCONS_00003112	0	-	197473793	197744438	255,0,0	23	6309,217,83,108,57,69,41,91,102,126,102,46,101,111,54,81,70,120,50,44,211,65,170,	0,7064,8207,35300,36295,41258,42069,48358,78488,90544,102409,107267,112995,138047,141026,147571,153636,167373,169456,210367,230922,268204,270475,
chr1	197473793	197744514	TCONS_00003113	0	-	197473793	197744514	255,0,0	22	6309,217,83,108,57,69,41,91,102,126,102,46,101,111,54,81,70,120,50,44,65,246,	0,7064,8207,35300,36295,41258,42069,48358,78488,90544,102409,107267,112995,138047,141026,147571,153636,167373,169456,210367,268204,270475,
chr1	197473793	197752227	TCONS_00003120	0	-	197473793	197752227	255,0,0	24	6309,217,83,108,57,69,41,91,102,126,102,46,101,111,54,60,81,70,120,50,44,65,247,134,	0,7064,8207,35300,36295,41258,42069,48358,78488,90544,102409,107267,112995,138047,141026,142391,147571,153636,167373,169456,210367,268204,277326,278300,
chr1	197703166	197744424	TCONS_00003126	0	-	197703166	197744424	255,0,0	3	1760,65,156,	0,38831,41102,
chr1	200612822	200639100	TCONS_00003130	0	-	200612822	200639100	255,0,0	8	823,129,153,252,90,168,815,206,	0,4744,5379,6730,15332,20224,22242,26072,
chr1	201103714	201123122	TCONS_00003131	0	-	201103714	201123122	255,0,0	5	1229,132,109,92,137,	0,9233,12153,17174,19271,
chr1	201103714	201123511	TCONS_00003132	0	-	201103714	201123511	255,0,0	6	1229,132,109,92,102,236,	0,9233,12153,17174,19271,19561,
chr1	201103714	201123613	TCONS_00003133	0	-	201103714	201123613	255,0,0	6	1229,132,109,92,102,41,	0,9233,12153,17174,19271,19858,
chr1	201348714	201360228	TCONS_00003135	0	-	201348714	201360228	255,0,0	10	2307,75,87,138,73,44,105,844,144,23,	0,2665,3066,3487,3730,5205,6114,6748,9573,11491,
chr1	201348714	201369025	TCONS_00003136	0	-	201348714	201369025	255,0,0	10	2307,75,87,138,73,44,105,844,144,629,	0,2665,3066,3487,3730,5205,6114,6748,9573,19682,
chr1	201433450	201438313	TCONS_00003137	0	-	201433450	201438313	255,0,0	2	1856,845,	0,4018,
chr1	201452592	201465434	TCONS_00003138	0	-	201452592	201465434	255,0,0	5	1325,94,130,169,115,	0,1818,5390,6711,12727,
chr1	201452592	201476278	TCONS_00003139	0	-	201452592	201476278	255,0,0	6	1325,94,130,169,113,81,	0,1818,5390,6711,12727,23605,
chr1	202116065	202129772	TCONS_00003140	0	-	202116065	202129772	255,0,0	10	1762,114,158,111,138,77,85,131,174,100,	0,3373,5604,6787,7248,8595,10801,11180,12343,13607,
chr1	202116065	202130718	TCONS_00003141	0	-	202116065	202130718	255,0,0	11	1762,114,158,111,138,77,85,184,174,69,204,	0,3373,5604,6787,7248,8595,10801,11180,12343,13607,14449,
chr1	202116065	202130737	TCONS_00003142	0	-	202116065	202130737	255,0,0	10	1762,114,158,111,138,77,85,184,174,223,	0,3373,5604,6787,7248,8595,10801,11180,12343,14449,
chr1	202300745	202311095	TCONS_00003144	0	-	202300745	202311095	255,0,0	7	343,84,99,106,70,173,73,	0,1392,1619,1832,3371,4028,10277,
chr1	202695645	202777575	TCONS_00003145	0	-	202695645	202777575	255,0,0	27	2656,321,155,112,486,159,180,139,356,115,151,125,182,195,120,163,182,159,120,159,110,97,135,171,123,78,346,	0,3189,4391,5310,6883,8911,9695,14156,14849,15873,16137,19340,19624,22427,24141,26387,28753,29840,31873,33897,36181,37531,40408,46600,48095,50499,81584,
chr1	202860027	202896373	TCONS_00003147	0	-	202860027	202896373	255,0,0	12	1760,187,99,159,196,107,115,150,218,154,240,157,	0,2339,3284,3691,4622,5954,18110,20154,27271,28855,34068,36189,
chr1	202909876	202927476	TCONS_00003148	0	-	202909876	202927476	255,0,0	8	953,194,188,187,172,117,235,164,	0,1276,3009,4234,5690,7555,10181,17436,
chr1	202930804	202936396	TCONS_00003150	0	-	202930804	202936396	255,0,0	9	1023,100,86,84,130,107,73,150,78,	0,1389,1965,2935,3694,4210,4851,5072,5514,
chr1	203147948	203155861	TCONS_00003152	0	-	203147948	203155861	255,0,0	9	765,117,124,122,151,57,202,30,135,	0,940,2341,3910,4820,5755,6363,7495,7778,
chr1	203147948	203155865	TCONS_00003153	0	-	203147948	203155865	255,0,0	10	765,117,183,124,122,151,57,202,30,139,	0,940,1649,2341,3910,4820,5755,6363,7495,7778,
chr1	203185710	203198820	TCONS_00003154	0	-	203185710	203198820	255,0,0	11	551,127,114,186,124,125,166,57,202,30,81,	0,1156,2633,3081,5619,6552,6912,8465,9086,11950,13029,
chr1	204372018	204381546	TCONS_00003155	0	-	204372018	204381546	255,0,0	2	3423,2927,	0,6601,
chr1	205054642	205091122	TCONS_00003157	0	-	205054642	205091122	255,0,0	14	3301,78,230,70,118,72,154,120,110,163,141,173,26,140,	0,9472,11167,11811,13474,14226,14396,14637,16085,18342,19513,29274,30343,36340,
chr1	205054642	205091140	TCONS_00003158	0	-	205054642	205091140	255,0,0	14	3301,192,230,70,118,72,154,120,110,163,141,173,26,158,	0,9358,11167,11811,13474,14226,14396,14637,16085,18342,19513,29274,30343,36340,
chr1	205271026	205290895	TCONS_00003160	0	-	205271026	205290895	255,0,0	7	2615,133,120,66,152,121,370,	0,3300,4289,6266,6682,9806,19499,
chr1	205577072	205590581	TCONS_00003161	0	-	205577072	205590581	255,0,0	4	8700,117,873,37,	0,11012,12021,13472,
chr1	205577072	205594814	TCONS_00003163	0	-	205577072	205594814	255,0,0	5	8700,117,873,216,55,	0,11012,12021,15731,17687,
chr1	205577072	205600948	TCONS_00003167	0	-	205577072	205600948	255,0,0	5	8700,117,873,216,189,	0,11012,12021,15731,23687,
chr1	205627000	205649683	TCONS_00003168	0	-	205627000	205649683	255,0,0	5	1799,266,786,402,162,	0,3988,4960,6612,22521,
chr1	205682003	205719184	TCONS_00003169	0	-	205682003	205719184	255,0,0	7	5604,150,153,56,106,50,100,	0,6651,7625,11050,14824,16696,37081,
chr1	205736630	205744583	TCONS_00003171	0	-	205736630	205744583	255,0,0	6	2951,122,182,72,259,82,	0,3230,3969,4993,7330,7871,
chr1	205736630	205744589	TCONS_00003172	0	-	205736630	205744589	255,0,0	6	2951,122,182,72,254,60,	0,3230,3969,4993,7330,7899,
chr1	205736630	205744593	TCONS_00003174	0	-	205736630	205744593	255,0,0	5	2951,122,182,72,633,	0,3230,3969,4993,7330,
chr1	205736630	205744593	TCONS_00003175	0	-	205736630	205744593	255,0,0	6	2951,122,182,72,254,92,	0,3230,3969,4993,7330,7871,
chr1	205736630	205744594	TCONS_00003177	0	-	205736630	205744594	255,0,0	6	2951,122,182,72,259,65,	0,3230,3969,4993,7330,7899,
chr1	205882193	205898610	TCONS_00003180	0	-	205882193	205898610	255,0,0	14	2339,72,146,55,282,114,93,70,107,96,78,114,148,279,	0,4217,5774,7110,8500,10016,10269,10478,11317,13469,14145,14426,14836,16138,
chr1	205882193	205912606	TCONS_00003181	0	-	205882193	205912606	255,0,0	21	2339,72,146,55,282,114,93,70,107,96,78,114,148,83,153,165,176,111,140,143,114,	0,4217,5774,7110,8500,10016,10269,10478,11317,13469,14145,14426,14836,15761,16138,16826,18794,19636,19879,22630,30299,
chr1	206238737	206257881	TCONS_00003183	0	-	206238737	206257881	255,0,0	6	842,62,144,101,107,200,	0,1396,2795,4412,4754,18944,
chr1	206764763	206785804	TCONS_00003184	0	-	206764763	206785804	255,0,0	15	414,175,121,96,90,150,104,46,118,254,108,91,84,191,165,	0,2204,4303,5686,7593,8053,8323,8853,10926,11541,13989,16825,17965,19773,20876,
chr1	206940563	206945031	TCONS_00003185	0	-	206940563	206945031	255,0,0	3	1510,66,780,	0,2610,3688,
chr1	206940563	206946034	TCONS_00003186	0	-	206940563	206946034	255,0,0	4	1510,66,509,419,	0,2610,3688,5052,
chr1	206940563	206946102	TCONS_00003187	0	-	206940563	206946102	255,0,0	5	1510,66,153,60,487,	0,2610,3688,4137,5052,
chr1	208059394	208084672	TCONS_00003189	0	-	208059394	208084672	255,0,0	8	1874,165,53,157,81,254,183,326,	0,2632,3111,3415,11443,12923,13771,24952,
chr1	209788219	209792266	TCONS_00003191	0	-	209788219	209792266	255,0,0	5	533,154,177,142,470,	0,1596,2535,3032,3577,
chr1	209788219	209824706	TCONS_00003192	0	-	209788219	209824706	255,0,0	23	533,154,177,142,208,145,198,221,161,379,112,197,156,189,121,194,64,192,74,115,155,65,274,	0,1596,2535,3032,3577,7661,8107,8630,8965,10773,11992,12508,13160,14862,15740,17708,18195,19572,23033,23659,35089,36042,36213,
chr1	209788219	209824801	TCONS_00003193	0	-	209788219	209824801	255,0,0	22	533,154,177,142,208,145,198,221,161,379,112,197,156,189,121,194,64,192,74,115,155,540,	0,1596,2535,3032,3577,7661,8107,8630,8965,10773,11992,12508,13160,14862,15740,17708,18195,19572,23033,23659,35089,36042,
chr1	209834699	209836421	TCONS_00003194	0	-	209834699	209836421	255,0,0	2	213,166,	0,1556,
chr1	209834699	209837702	TCONS_00003195	0	-	209834699	209837702	255,0,0	3	213,151,101,	0,1556,2902,
chr1	209834699	209849863	TCONS_00003196	0	-	209834699	209849863	255,0,0	3	213,151,44,	0,1556,15120,
chr1	209834699	209912769	TCONS_00003197	0	-	209834699	209912769	255,0,0	4	213,151,115,35,	0,1556,62675,78035,
chr1	211744955	211752689	TCONS_00003198	0	-	211744955	211752689	255,0,0	2	4676,1357,	0,6377,
chr1	211916686	212002847	TCONS_00003200	0	-	211916686	212002847	255,0,0	8	6706,107,127,274,96,119,265,56,	0,7616,35573,39884,44287,49727,85714,86105,
chr1	211916686	212003410	TCONS_00003201	0	-	211916686	212003410	255,0,0	8	6706,107,127,274,96,119,265,24,	0,7616,35573,39884,44287,49727,85714,86700,
chr1	211916686	212004142	TCONS_00003205	0	-	211916686	212004142	255,0,0	9	6706,107,127,274,96,119,265,148,228,	0,7616,35573,39884,44287,49727,85714,86838,87228,
chr1	212532537	212588241	TCONS_00003207	0	-	212532537	212588241	255,0,0	9	93,1021,108,145,143,152,210,97,178,	0,5160,15997,18366,20699,26078,27695,51229,55526,
chr1	212859438	212873154	TCONS_00003215	0	-	212859438	212873154	255,0,0	3	883,105,140,	0,10864,13576,
chr1	212908439	212965159	TCONS_00003221	0	-	212908439	212965159	255,0,0	6	3589,68,55,131,79,288,	0,4436,47274,49265,52461,56432,
chr1	220141854	220188839	TCONS_00003227	0	-	220141854	220188839	255,0,0	22	444,65,79,161,174,198,156,102,80,73,210,52,263,234,360,118,113,208,137,111,85,396,	0,545,3556,4725,10033,10905,11572,12243,12865,14259,14676,15693,18629,20077,28470,32625,36735,37593,38689,42433,45083,46589,
chr1	220141854	220219834	TCONS_00003228	0	-	220141854	220219834	255,0,0	32	444,65,79,161,174,198,156,102,80,73,210,52,263,234,360,118,113,208,137,111,60,85,234,172,193,127,95,140,157,100,85,150,	0,545,3556,4725,10033,10905,11572,12243,12865,14259,14676,15693,18629,20077,28470,32625,36735,37593,38689,42433,49936,50482,51475,53834,55751,56619,61873,63874,64989,66401,71672,77830,
chr1	220230785	220263272	TCONS_00003229	0	-	220230785	220263272	255,0,0	9	1549,106,198,92,49,108,105,128,245,	0,2242,5313,9858,11940,15406,16523,22283,32242,
chr1	221874664	221916110	TCONS_00003232	0	-	221874664	221916110	255,0,0	5	1355,372,854,127,224,	0,4772,37611,40658,41222,
chr1	221874664	221916184	TCONS_00003233	0	-	221874664	221916184	255,0,0	3	1355,372,862,	0,4772,40658,
chr1	222843475	222861042	TCONS_00003244	0	-	222843475	222861042	255,0,0	5	117,123,123,107,106,	0,3179,5962,16796,17461,
chr1	222843475	222885725	TCONS_00003246	0	-	222843475	222885725	255,0,0	9	117,123,123,139,64,55,54,70,176,	0,3179,5962,16796,17461,23655,24076,33014,42074,
chr1	223961982	224033526	TCONS_00003251	0	-	223961982	224033526	255,0,0	21	65,165,73,1633,200,167,134,138,776,463,149,111,229,165,182,175,102,83,114,148,171,	0,4150,4786,4981,9834,14727,18108,19022,21534,23934,25618,26419,27835,28450,28990,29893,32565,36150,39959,46939,71373,
chr1	223966752	224022720	TCONS_00003252	0	-	223966752	224022720	255,0,0	19	89,1633,200,167,134,138,776,463,149,111,229,165,182,175,102,83,114,148,187,	0,211,5064,9957,13338,14252,16764,19164,20848,21649,23065,23680,24220,25123,27795,31380,35189,42169,55781,
chr1	223966963	224022712	TCONS_00003253	0	-	223966963	224022712	255,0,0	19	1633,200,167,134,138,776,463,149,111,229,165,182,175,102,83,114,132,148,179,	0,4853,9746,13127,14041,16553,18953,20637,21438,22854,23469,24009,24912,27584,31169,34978,38944,41958,55570,
chr1	224396182	224398225	TCONS_00003254	0	-	224396182	224398225	255,0,0	2	531,283,	0,1760,
chr1	224572776	224622307	TCONS_00003256	0	-	224572776	224622307	255,0,0	14	4786,186,130,79,146,120,141,139,157,98,137,105,100,922,	0,8753,13022,13440,13814,15875,19355,26352,33185,34443,39443,46402,46607,48609,
chr1	224572776	224622524	TCONS_00003257	0	-	224572776	224622524	255,0,0	14	4786,186,130,79,146,120,141,139,157,98,137,57,100,1139,	0,8753,13022,13440,13814,15875,19355,26352,33185,34443,39443,46450,46607,48609,
chr1	225588957	225615797	TCONS_00003258	0	-	225588957	225615797	255,0,0	14	2208,123,81,169,126,104,192,55,197,190,84,201,179,142,	0,3148,3370,5408,9035,10081,11198,14022,16728,18007,18459,20821,22655,26698,
chr1	226027997	226070085	TCONS_00003262	0	-	226027997	226070085	255,0,0	26	2547,95,180,63,116,168,106,163,63,87,107,154,138,134,124,81,71,109,52,143,38,67,80,200,191,82,	0,6541,6737,8195,8600,9615,12367,13332,15581,16355,16613,18898,20562,21920,22157,22473,25599,26276,26814,27590,30778,31689,33990,37097,38922,42006,
chr1	226027997	226070086	TCONS_00003265	0	-	226027997	226070086	255,0,0	27	891,989,453,180,63,116,168,106,163,63,87,107,154,138,134,124,81,71,109,52,143,38,67,80,200,191,83,	0,2410,6183,6737,8195,8600,9615,12367,13332,15581,16355,16613,18898,20562,21920,22157,22473,25599,26276,26814,27590,30778,31689,33990,37097,38922,42006,
chr1	226027997	226070130	TCONS_00003266	0	-	226027997	226070130	255,0,0	26	891,95,180,63,116,168,106,163,63,87,107,154,138,134,124,81,71,109,52,143,38,67,80,200,191,127,	0,6541,6737,8195,8600,9615,12367,13332,15581,16355,16613,18898,20562,21920,22157,22473,25599,26276,26814,27590,30778,31689,33990,37097,38922,42006,
chr1	226027997	226070134	TCONS_00003267	0	-	226027997	226070134	255,0,0	26	891,138,180,63,116,168,106,163,63,87,107,154,138,134,124,81,71,109,52,143,38,67,80,200,191,131,	0,6498,6737,8195,8600,9615,12367,13332,15581,16355,16613,18898,20562,21920,22157,22473,25599,26276,26814,27590,30778,31689,33990,37097,38922,42006,
chr1	226107518	226111989	TCONS_00003270	0	-	226107518	226111989	255,0,0	7	802,164,93,222,180,71,246,	0,1389,1733,2039,2385,3882,4225,
chr1	226170405	226187179	TCONS_00003271	0	-	226170405	226187179	255,0,0	7	2819,493,121,170,112,118,286,	0,5191,8538,9693,10186,12561,16488,
chr1	226332422	226374755	TCONS_00003272	0	-	226332422	226374755	255,0,0	8	2100,285,187,175,159,141,142,665,	0,7613,9925,14462,16809,20067,21137,41668,
chr1	226548359	226595775	TCONS_00003273	0	-	226548359	226595775	255,0,0	23	883,115,62,128,153,99,129,123,84,129,196,133,69,243,141,148,177,117,100,215,116,166,265,	0,1310,2440,3284,4343,5295,6821,7540,9775,13567,16449,18483,18914,19263,20409,22377,24845,25667,27997,29751,31540,41555,47151,
chr1	228288430	228291061	TCONS_00003275	0	-	228288430	228291061	255,0,0	8	525,135,86,73,83,46,151,227,	0,609,1350,1580,1748,1913,2169,2404,
chr1	228294317	228296995	TCONS_00003276	0	-	228294317	228296995	255,0,0	5	302,202,84,67,146,	0,1051,1618,2338,2532,
chr1	228581280	228584888	TCONS_00003277	0	-	228581280	228584888	255,0,0	3	1673,101,45,	0,3367,3563,
chr1	228581280	228589913	TCONS_00003278	0	-	228581280	228589913	255,0,0	5	1673,101,23,231,147,	0,3367,3563,7384,8486,
chr1	228581280	228594512	TCONS_00003279	0	-	228581280	228594512	255,0,0	6	1673,101,23,231,96,658,	0,3367,3563,7384,8486,12574,
chr1	229456532	229478309	TCONS_00003280	0	-	229456532	229478309	255,0,0	3	4626,269,464,	0,5952,21313,
chr1	229652335	229685280	TCONS_00003283	0	-	229652335	229685280	255,0,0	12	1822,35,44,181,80,210,96,136,147,135,203,300,	0,2252,5003,9347,10640,13610,15047,22867,24017,25648,30910,32645,
chr1	229652335	229694448	TCONS_00003284	0	-	229652335	229694448	255,0,0	13	1822,35,44,181,80,210,96,136,147,135,203,201,566,	0,2252,5003,9347,10640,13610,15047,22867,24017,25648,30910,32645,41547,
chr1	231040750	231114453	TCONS_00003287	0	-	231040750	231114453	255,0,0	23	2015,80,79,80,136,110,85,84,93,133,131,157,175,142,83,111,117,93,66,71,76,95,148,	0,3707,3937,6465,7618,11188,15505,16416,18836,19836,20512,23932,26293,26731,28774,34381,35435,38801,40384,49328,53219,56204,73555,
chr1	231040750	231114474	TCONS_00003288	0	-	231040750	231114474	255,0,0	24	2015,80,79,80,136,110,85,84,93,133,131,157,175,142,83,107,111,117,93,66,71,76,95,169,	0,3707,3937,6465,7618,11188,15505,16416,18836,19836,20512,23932,26293,26731,28774,31153,34381,35435,38801,40384,49328,53219,56204,73555,
chr1	231040750	231114581	TCONS_00003289	0	-	231040750	231114581	255,0,0	23	2015,80,79,80,136,110,85,84,93,133,131,157,175,142,83,3339,117,93,66,71,76,95,276,	0,3707,3937,6465,7618,11188,15505,16416,18836,19836,20512,23932,26293,26731,28774,31153,35435,38801,40384,49328,53219,56204,73555,
chr1	231359515	231377204	TCONS_00003290	0	-	231359515	231377204	255,0,0	7	645,53,87,96,60,332,435,	0,1701,2969,3203,5380,15087,17254,
chr1	231498529	231557237	TCONS_00003292	0	-	231498529	231557237	255,0,0	5	3692,68,137,120,494,	0,4785,7778,11196,58214,
chr1	232533487	232709972	TCONS_00003294	0	-	232533487	232709972	255,0,0	22	1532,82,124,132,220,154,225,389,104,101,84,258,275,577,158,104,175,189,134,1752,94,53,	0,4650,5706,17752,27847,30669,34505,41366,43549,44026,45860,47787,63145,67098,73629,81885,86050,93132,95785,116115,135748,176432,
chr1	232533487	232744735	TCONS_00003298	0	-	232533487	232744735	255,0,0	22	1532,82,124,132,220,154,225,389,104,101,84,258,275,577,158,104,175,189,134,1752,49,78,	0,4650,5706,17752,27847,30669,34505,41366,43549,44026,45860,47787,63145,67098,73629,81885,86050,93132,95785,116115,176432,211170,
chr1	232533487	232765691	TCONS_00003301	0	-	232533487	232765691	255,0,0	22	1532,82,124,132,220,154,225,389,104,101,84,258,275,577,158,104,175,189,134,1752,49,77,	0,4650,5706,17752,27847,30669,34505,41366,43549,44026,45860,47787,63145,67098,73629,81885,86050,93132,95785,116115,176432,232127,
chr1	234527089	234538060	TCONS_00003307	0	-	234527089	234538060	255,0,0	7	402,137,125,192,172,82,99,	0,1072,2018,2302,7038,9837,10872,
chr1	234527089	234608591	TCONS_00003308	0	-	234527089	234608591	255,0,0	29	402,137,125,192,172,82,197,87,150,111,121,72,191,189,262,215,162,98,173,100,139,90,97,136,98,53,149,70,132,	0,1072,2018,2302,7038,9837,14559,19101,26740,29358,34329,35973,36232,37792,38072,38743,42066,45931,55459,57136,59084,66323,67886,68917,72493,74312,76158,79844,81370,
chr1	234527089	234614029	TCONS_00003309	0	-	234527089	234614029	255,0,0	30	402,137,125,192,172,82,197,87,150,111,121,72,191,189,262,215,162,98,173,97,139,90,97,136,98,53,149,70,98,111,	0,1072,2018,2302,7038,9837,14559,19101,26740,29358,34329,35973,36232,37792,38072,38743,42066,45931,55459,57136,59084,66323,67886,68917,72493,74312,76158,79844,81370,86829,
chr1	234527089	234614040	TCONS_00003310	0	-	234527089	234614040	255,0,0	30	402,137,125,192,172,82,197,87,150,111,121,72,191,189,262,215,162,98,173,100,139,90,97,136,98,53,149,70,98,122,	0,1072,2018,2302,7038,9837,14559,19101,26740,29358,34329,35973,36232,37792,38072,38743,42066,45931,55459,57136,59084,66323,67886,68917,72493,74312,76158,79844,81370,86829,
chr1	234732847	234744873	TCONS_00003311	0	-	234732847	234744873	255,0,0	6	525,345,60,44,895,681,	0,1615,3713,5777,9856,11345,
chr1	234737935	234744824	TCONS_00003315	0	-	234737935	234744824	255,0,0	3	733,895,632,	0,4768,6257,
chr1	234739049	234745304	TCONS_00003316	0	-	234739049	234745304	255,0,0	2	4549,1112,	0,5143,
chr1	234739049	234745372	TCONS_00003317	0	-	234739049	234745372	255,0,0	2	4549,1132,	0,5191,
chr1	235294317	235324591	TCONS_00003318	0	-	235294317	235324591	255,0,0	11	995,119,40,64,84,44,60,232,137,175,103,	0,4649,5031,6874,7088,17401,21703,23878,29508,29890,30171,
chr1	235330106	235491560	TCONS_00003319	0	-	235330106	235491560	255,0,0	24	1861,147,216,114,1209,199,85,258,176,244,98,95,73,155,77,80,139,92,80,91,66,111,55,477,	0,5826,8392,11008,14793,27221,29239,46977,53001,53510,54773,56374,57911,62439,64321,67621,73521,79628,85938,88868,90368,93850,160122,160977,
chr1	235330106	235491734	TCONS_00003322	0	-	235330106	235491734	255,0,0	23	1861,147,216,114,1209,199,85,176,244,98,95,73,155,77,80,139,92,80,91,66,111,55,651,	0,5826,8392,11008,14793,27221,29239,53001,53510,54773,56374,57911,62439,64321,67621,73521,79628,85938,88868,90368,93850,160122,160977,
chr1	235824224	235938387	TCONS_00003325	0	-	235824224	235938387	255,0,0	36	2154,72,157,98,140,99,137,190,231,218,141,157,67,245,153,56,62,97,146,189,77,177,207,179,192,153,167,231,170,178,628,132,199,138,150,175,	0,3059,3540,16166,16555,26024,32425,36158,41822,48166,51132,54276,55787,59736,63103,67151,68671,69922,70107,72578,72905,73558,80497,83054,85411,90285,91080,92119,94553,96356,98047,101795,105154,109235,112917,113988,
chr1	235824224	236030206	TCONS_00003327	0	-	235824224	236030206	255,0,0	53	2154,72,157,98,140,99,137,190,231,218,141,157,67,245,153,56,62,97,146,189,77,177,207,179,192,153,167,231,170,178,628,132,199,138,150,174,246,191,161,174,145,427,110,67,227,157,162,1030,2080,91,199,90,64,	0,3059,3540,16166,16555,26024,32425,36158,41822,48166,51132,54276,55787,59736,63103,67151,68671,69922,70107,72578,72905,73558,80497,83054,85411,90285,91080,92119,94553,96356,98047,101795,105154,109235,112917,113988,116138,119940,121002,126275,127776,130774,132578,139395,139946,141983,143579,144818,147530,152046,169301,172653,205918,
chr1	235824224	236047119	TCONS_00003328	0	-	235824224	236047119	255,0,0	53	2154,72,157,98,140,99,137,190,231,218,141,157,67,245,153,56,62,97,146,189,77,177,207,179,192,153,167,231,170,178,628,132,199,138,150,174,246,191,161,174,145,427,110,67,227,157,162,1030,2080,91,199,90,633,	0,3059,3540,16166,16555,26024,32425,36158,41822,48166,51132,54276,55787,59736,63103,67151,68671,69922,70107,72578,72905,73558,80497,83054,85411,90285,91080,92119,94553,96356,98047,101795,105154,109235,112917,113988,116138,119940,121002,126275,127776,130774,132578,139395,139946,141983,143579,144818,147530,152046,169301,172653,222262,
chr1	236035269	236047135	TCONS_00003329	0	-	236035269	236047135	255,0,0	2	606,649,	0,11217,
chr1	241660699	241683051	TCONS_00003331	0	-	241660699	241683051	255,0,0	10	571,154,128,204,166,183,177,111,135,161,	0,3037,5043,6642,8603,11203,14567,16203,19782,22191,
chr1	241752032	241803485	TCONS_00003332	0	-	241752032	241803485	255,0,0	5	213,2682,252,320,302,	0,3279,9015,15529,51151,
chr1	241754652	241803503	TCONS_00003335	0	-	241754652	241803503	255,0,0	4	3341,252,320,320,	0,6395,12909,48531,
chr1	241754652	241803525	TCONS_00003336	0	-	241754652	241803525	255,0,0	3	3341,252,342,	0,6395,48531,
chr1	242158520	242162418	TCONS_00003337	0	-	242158520	242162418	255,0,0	4	1167,107,56,166,	0,3295,3557,3732,
chr1	243287617	243395976	TCONS_00003338	0	-	243287617	243395976	255,0,0	20	2423,52,94,89,171,148,235,1833,127,150,294,164,477,135,163,59,79,90,146,111,	0,3933,5044,11827,15621,18000,31905,39968,45312,48381,61463,61943,66702,74744,76202,76461,87570,97408,100860,108248,
chr1	243287617	243417827	TCONS_00003343	0	-	243287617	243417827	255,0,0	19	2423,52,94,89,171,178,235,1833,127,150,164,477,135,163,59,79,90,146,175,	0,3933,5044,11827,15621,17970,31905,39968,45312,48381,61943,66702,74744,76202,76461,87570,97408,100860,130035,
chr1	243287617	243419110	TCONS_00003346	0	-	243287617	243419110	255,0,0	19	2423,52,94,89,171,148,235,1833,127,150,644,477,135,163,59,79,90,146,769,	0,3933,5044,11827,15621,18000,31905,39968,45312,48381,61463,66702,74744,76202,76461,87570,97408,100860,130724,
chr1	244571485	244615207	TCONS_00003351	0	-	244571485	244615207	255,0,0	13	1455,150,98,125,155,127,82,108,67,51,69,103,271,	0,3103,7797,9444,10576,11986,14651,15769,16137,24361,28641,29482,43451,
chr1	245009903	245027831	TCONS_00003358	0	-	245009903	245027831	255,0,0	14	7902,72,185,255,169,129,120,264,113,100,140,74,112,856,	0,8371,8822,9302,9855,10126,10996,11409,12127,12673,13733,15859,16017,17072,
chr1	245021310	245027840	TCONS_00003359	0	-	245021310	245027840	255,0,0	7	266,113,100,140,74,112,865,	0,720,1266,2326,4452,4610,5665,
chr1	247316467	247335309	TCONS_00003370	0	-	247316467	247335309	255,0,0	4	4052,61,127,160,	0,5840,6521,18682,
chr1	247316467	247335311	TCONS_00003372	0	-	247316467	247335311	255,0,0	4	4238,61,127,162,	0,5840,6521,18682,
chr1	247349806	247374158	TCONS_00003379	0	-	247349806	247374158	255,0,0	5	4510,96,127,80,166,	0,12855,13562,15511,24186,
chr1	247349806	247374167	TCONS_00003380	0	-	247349806	247374167	255,0,0	4	4510,96,2029,175,	0,12855,13562,24186,
chr1	247363309	247374167	TCONS_00003385	0	-	247363309	247374167	255,0,0	3	186,65,175,	0,2008,10683,
chr1	247460621	247494982	TCONS_00003391	0	-	247460621	247494982	255,0,0	9	3957,114,108,133,77,184,427,116,249,	0,11155,12379,13004,25834,31363,31869,32646,34112,
chr1	247460621	247497863	TCONS_00003392	0	-	247460621	247497863	255,0,0	10	3957,114,108,133,77,184,427,116,216,1867,	0,11155,12379,13004,25834,31363,31869,32646,34112,35375,
chr10	181451	300808	TCONS_00003462	0	+	181451	300808	255,0,0	15	48,135,160,162,78,93,88,56,78,119,208,69,273,186,2521,	0,44482,74377,85683,101326,102073,103926,104544,105381,106509,111254,111886,112824,113391,116836,
chr10	225932	300808	TCONS_00003463	0	+	225932	300808	255,0,0	14	136,160,162,78,93,88,56,78,119,208,69,273,186,2521,	0,29896,41202,56845,57592,59445,60063,60900,62028,66773,67405,68343,68910,72355,
chr10	1034347	1065944	TCONS_00003464	0	+	1034347	1065944	255,0,0	17	120,171,104,137,101,93,192,66,90,111,78,52,101,198,66,144,2930,	0,4081,7521,7698,8800,10595,12269,12540,17410,18610,20550,21121,22012,24057,25839,27345,28667,
chr10	1095414	1178416	TCONS_00003465	0	+	1095414	1178416	255,0,0	15	167,217,178,97,96,65,136,72,45,77,235,142,135,115,3264,	0,6873,22641,28432,30536,30937,34928,36811,43977,46695,54127,55651,74743,75435,79738,
chr10	1102763	1178416	TCONS_00003468	0	+	1102763	1178416	255,0,0	14	56,178,97,96,65,136,72,45,77,235,142,135,115,3264,	0,15292,21083,23187,23588,27579,29462,36628,39346,46778,48302,67394,68086,72389,
chr10	1102769	1178416	TCONS_00003469	0	+	1102769	1178416	255,0,0	14	50,178,97,96,65,136,72,45,77,238,142,135,115,3264,	0,15286,21077,23181,23582,27573,29456,36622,39340,46769,48296,67388,68080,72383,
chr10	3109717	3179372	TCONS_00003473	0	+	3109717	3179372	255,0,0	22	182,74,78,190,166,45,109,96,93,126,65,70,147,71,88,153,165,62,112,100,103,731,	0,14862,31749,33839,36253,37589,37867,39688,41175,41829,44696,45593,45846,49250,51256,52366,62293,64854,65677,66957,68210,68924,
chr10	3827744	3834626	TCONS_00003480	0	+	3827744	3834626	255,0,0	2	2236,108,	0,6774,
chr10	5005587	5022145	TCONS_00003482	0	+	5005587	5022145	255,0,0	9	133,168,117,78,123,110,166,83,2254,	0,2518,3531,4913,5426,8805,9188,12455,14304,
chr10	5136606	5149880	TCONS_00003483	0	+	5136606	5149880	255,0,0	9	114,168,117,78,123,110,166,83,228,	0,1995,3019,4387,4912,7686,8070,11180,13046,
chr10	5488549	5501194	TCONS_00003485	0	+	5488549	5501194	255,0,0	10	272,108,168,63,97,77,258,171,187,2644,	0,5243,5771,6271,6663,6897,7678,8361,9500,10001,
chr10	5726917	5808181	TCONS_00003492	0	+	5726917	5808181	255,0,0	20	221,92,125,20,100,101,104,73,63,717,243,880,430,3849,126,154,106,182,115,3190,	0,32704,35589,35800,35916,38722,39475,41930,42106,45532,50349,54663,57142,61224,71658,72565,73932,76335,77577,78074,
chr10	5727019	5808181	TCONS_00003494	0	+	5727019	5808181	255,0,0	23	119,146,96,73,92,125,20,100,101,104,73,63,717,243,880,430,3849,126,154,106,182,115,3190,	0,27337,27766,29078,32602,35487,35698,35814,38620,39373,41828,42004,45430,50247,54561,57040,61122,71556,72463,73830,76233,77475,77972,
chr10	5734867	5808181	TCONS_00003496	0	+	5734867	5808181	255,0,0	24	14,134,146,96,73,92,125,20,100,101,104,73,63,717,243,880,430,3849,126,154,106,182,115,3190,	0,16625,19489,19918,21230,24754,27639,27850,27966,30772,31525,33980,34156,37582,42399,46713,49192,53274,63708,64615,65982,68385,69627,70124,
chr10	5741682	5808181	TCONS_00003498	0	+	5741682	5808181	255,0,0	23	18,134,96,73,92,125,20,100,101,104,73,63,717,243,880,430,3849,126,154,106,182,115,3190,	0,9810,13103,14415,17939,20824,21035,21151,23957,24710,27165,27341,30767,35584,39898,42377,46459,56893,57800,59167,61570,62812,63309,
chr10	5751497	5808181	TCONS_00003500	0	+	5751497	5808181	255,0,0	21	129,96,73,125,20,100,101,104,73,63,717,243,880,430,3849,126,154,106,182,115,3190,	0,3288,4600,11009,11220,11336,14142,14895,17350,17526,20952,25769,30083,32562,36644,47078,47985,49352,51755,52997,53494,
chr10	5808455	5810275	TCONS_00003501	0	+	5808455	5810275	255,0,0	2	144,100,	0,1720,
chr10	5932291	5979772	TCONS_00003502	0	+	5932291	5979772	255,0,0	21	18,156,596,131,136,191,93,92,169,223,88,87,137,100,122,76,198,126,107,132,700,	0,12691,15708,18596,18830,20609,23418,23849,25074,25905,27091,27261,28013,30929,31119,33292,33982,35038,37106,46127,46781,
chr10	6130984	6158885	TCONS_00003509	0	+	6130984	6158885	255,0,0	12	172,141,117,167,98,57,142,152,74,99,73,1470,	0,8026,12249,15909,17119,19664,20964,23188,24486,25027,26217,26431,
chr10	6131883	6158885	TCONS_00003510	0	+	6131883	6158885	255,0,0	12	51,141,117,167,98,57,142,152,74,99,73,1470,	0,7127,11350,15010,16220,18765,20065,22289,23587,24128,25318,25532,
chr10	6186869	6277603	TCONS_00003512	0	+	6186869	6277603	255,0,0	15	107,126,97,67,75,57,125,208,147,105,130,63,65,174,2746,	0,68716,70314,71218,71799,72228,74662,75751,76474,76734,77948,79051,79242,81285,87988,
chr10	6244902	6277603	TCONS_00003514	0	+	6244902	6277603	255,0,0	15	397,126,97,67,75,57,125,208,147,105,130,63,65,174,2746,	0,10683,12281,13185,13766,14195,16629,17718,18441,18701,19915,21018,21209,23252,29955,
chr10	7830011	7849848	TCONS_00003519	0	+	7830011	7849848	255,0,0	10	215,35,132,205,144,65,156,97,37,227,	0,8072,8998,10941,11723,11978,14221,14709,18925,19610,
chr10	8096655	8117479	TCONS_00003521	0	+	8096655	8117479	255,0,0	6	199,610,537,146,126,1778,	0,594,3612,9300,14780,19046,
chr10	11205885	11378741	TCONS_00003524	0	+	11205885	11378741	255,0,0	15	29,197,83,49,135,80,159,64,135,120,180,144,172,2173,4114,	0,1563,53502,85230,93815,102675,106743,111134,124495,150216,157284,161913,165003,166533,168742,
chr10	11207400	11378741	TCONS_00003535	0	+	11207400	11378741	255,0,0	12	245,83,49,135,80,159,64,135,132,180,144,7853,	0,51987,83715,92300,101160,105228,109619,122980,148701,155769,160398,163488,
chr10	11207402	11378741	TCONS_00003536	0	+	11207402	11378741	255,0,0	13	243,83,49,135,80,159,64,135,120,198,144,3703,4114,	0,51985,83713,92298,101158,105226,109617,122978,148699,155749,160396,163486,167225,
chr10	12110969	12165772	TCONS_00003550	0	+	12110969	12165772	255,0,0	17	217,156,212,195,270,172,199,313,85,140,151,107,165,83,170,86,2987,	0,12501,15569,18564,20015,22542,25102,28713,31207,32071,37275,38938,43929,48702,49778,51211,51816,
chr10	12237699	12292592	TCONS_00003552	0	+	12237699	12292592	255,0,0	14	323,190,72,58,33,96,107,49,76,123,29,129,138,283,	0,429,3004,14266,14589,20039,21660,35247,39347,41443,42756,50448,53880,54610,
chr10	12391488	12877544	TCONS_00003554	0	+	12391488	12877544	255,0,0	11	421,132,75,139,127,76,113,79,88,118,6777,	0,203735,317246,411458,420183,441668,464705,466760,474975,476083,479279,
chr10	12391754	12877544	TCONS_00003556	0	+	12391754	12877544	255,0,0	11	155,132,75,139,127,76,113,79,88,122,6777,	0,203469,316980,411192,419917,441402,464439,466494,474709,475817,479013,
chr10	13142085	13182614	TCONS_00003558	0	+	13142085	13182614	255,0,0	14	217,177,203,183,74,153,103,116,150,94,159,131,80,3870,	0,9026,10188,12367,16181,18802,22299,23909,25332,25860,27659,31981,33416,36659,
chr10	13142100	13182614	TCONS_00003565	0	+	13142100	13182614	255,0,0	16	202,152,54,177,203,183,74,153,103,116,150,94,159,131,80,3870,	0,8037,8861,9011,10173,12352,16166,18787,22284,23894,25317,25845,27644,31966,33401,36644,
chr10	14880295	14913934	TCONS_00003570	0	+	14880295	14913934	255,0,0	14	163,81,83,49,106,91,105,162,156,103,213,174,71,408,	0,1608,1778,10312,10493,11424,12922,14073,15828,17544,28786,29439,32300,33231,
chr10	15139154	15146254	TCONS_00003571	0	+	15139154	15146254	255,0,0	3	254,119,951,	0,5062,6149,
chr10	15139371	15146254	TCONS_00003572	0	+	15139371	15146254	255,0,0	3	394,119,951,	0,4845,5932,
chr10	17270579	17279610	TCONS_00003580	0	+	17270579	17279610	255,0,0	10	96,808,61,96,162,126,221,44,86,382,	0,597,2069,5006,5189,6112,6588,7265,7713,8649,
chr10	17813229	17843707	TCONS_00003584	0	+	17813229	17843707	255,0,0	3	151,142,5788,	0,4798,24690,
chr10	17851255	17953579	TCONS_00003586	0	+	17851255	17953579	255,0,0	30	270,402,174,165,114,147,186,158,111,116,149,200,128,88,145,42,164,68,101,146,115,167,103,233,166,150,114,165,42,1349,	0,13817,18285,24418,31436,36033,40327,43720,46996,52141,54288,57315,61002,61604,62738,64540,65846,68656,70477,71281,71823,76023,84965,88790,91546,92731,97646,98294,100066,100975,
chr1	109289280	109352252	TCONS_00003587_add	0	+	109289280	109352252	255,0,0	19	128,50,82,77,79,101,155,91,125,96,58,66,81,139,107,93,86,149,848,	0,5598,6404,10031,11851,13326,26006,29674,32627,35763,35990,46923,48168,49575,49961,51486,53561,60742,62124,
chr10	18048244	18089840	TCONS_00003589	0	+	18048244	18089840	255,0,0	4	36,73,142,4934,	0,12047,16773,36662,
chr10	18053568	18089840	TCONS_00003591	0	+	18053568	18089840	255,0,0	4	51,73,142,4934,	0,6723,11449,31338,
chr10	18058292	18089840	TCONS_00003592	0	+	18058292	18089840	255,0,0	4	30,73,142,4934,	0,1999,6725,26614,
chr10	18098323	18200492	TCONS_00003598	0	+	18098323	18200492	255,0,0	30	192,402,174,165,114,147,186,158,111,116,149,200,128,88,145,42,164,68,101,146,115,167,103,233,166,150,114,126,42,1349,	0,13720,18171,24304,31298,35894,40184,43572,46847,51992,54139,57167,60851,61453,62587,64389,65695,68505,70326,71130,71672,75874,84815,88639,91393,92578,97491,98139,99911,100820,
chr10	18948051	18970567	TCONS_00003600	0	+	18948051	18970567	255,0,0	6	561,61,148,84,152,6471,	0,7452,9407,13499,14861,16045,
chr1	109631455	109639552	TCONS_00003600_add	0	+	109631455	109639552	255,0,0	3	2049,132,2514,	0,4056,5583,
chr10	18948140	18970567	TCONS_00003601	0	+	18948140	18970567	255,0,0	6	66,61,148,84,152,6471,	0,7363,9318,13410,14772,15956,
chr10	20104859	20578866	TCONS_00003602	0	+	20104859	20578866	255,0,0	14	1261,212,147,70,123,119,100,96,82,61,151,39,161,10235,	0,185844,230938,252239,327364,331853,348537,361068,361397,395738,401495,403133,429414,463772,
chr10	21823323	22032554	TCONS_00003603	0	+	21823323	22032554	255,0,0	23	126,160,80,55,110,104,94,96,96,256,570,45,33,179,112,73,155,189,89,362,97,207,1687,	0,250,4438,51899,60936,77953,80436,82717,117278,136054,138955,146937,147830,179377,191849,193461,196505,198504,199109,199373,200744,205635,207544,
chr10	21823379	22032554	TCONS_00003604	0	+	21823379	22032554	255,0,0	22	70,160,80,55,110,104,94,96,96,256,570,45,179,112,73,155,189,89,362,97,207,1687,	0,194,4382,51843,60880,77897,80380,82661,117222,135998,138899,146881,179321,191793,193405,196449,198448,199053,199317,200688,205579,207488,
chr10	22605324	22609405	TCONS_00003606	0	+	22605324	22609405	255,0,0	8	161,112,64,35,61,57,60,538,	0,1488,1709,1876,2257,2410,2563,3543,
chr10	22610100	22620705	TCONS_00003607	0	+	22610100	22620705	255,0,0	10	525,131,97,56,51,109,46,99,81,2564,	0,5259,5718,6423,6570,6778,6962,7428,7876,8041,
chr10	23384549	23410282	TCONS_00003608	0	+	23384549	23410282	255,0,0	5	106,101,77,148,596,	0,8523,14621,23683,25137,
chr10	23385066	23410282	TCONS_00003609	0	+	23385066	23410282	255,0,0	5	61,101,77,148,596,	0,8006,14104,23166,24620,
chr10	23728060	23733449	TCONS_00003613	0	+	23728060	23733449	255,0,0	2	3803,1438,	0,3951,
chr10	23728140	23733449	TCONS_00003614	0	+	23728140	23733449	255,0,0	2	397,4114,	0,1195,
chr1	109756544	109789429	TCONS_00003614_add	0	+	109756544	109789429	255,0,0	12	206,71,81,159,144,156,222,130,158,130,523,42,	0,10055,14429,15491,16955,17708,21287,22054,22468,23321,23808,32843,
chr10	23728151	23733449	TCONS_00003615	0	+	23728151	23733449	255,0,0	2	714,4445,	0,853,
chr10	26727258	26857595	TCONS_00003616	0	+	26727258	26857595	255,0,0	15	126,202,72,88,293,78,160,122,87,144,111,99,115,104,1706,	0,322,53997,57974,62489,64867,73417,75209,95109,97744,103252,121775,122400,123996,128631,
chr1	109756548	109773644	TCONS_00003616_add	0	+	109756548	109773644	255,0,0	5	202,71,81,159,145,	0,10051,14425,15487,16951,
chr10	26727577	26857595	TCONS_00003617	0	+	26727577	26857595	255,0,0	14	205,72,88,293,78,160,122,87,144,111,99,115,104,1706,	0,53678,57655,62170,64548,73098,74890,94790,97425,102933,121456,122081,123677,128312,
chr10	26986121	27037711	TCONS_00003619	0	+	26986121	27037711	255,0,0	12	648,33,65,109,131,225,112,114,81,114,81,2450,	0,4969,7484,8093,12445,22942,26613,26821,38047,38273,45304,49140,
chr10	26991016	27037711	TCONS_00003621	0	+	26991016	27037711	255,0,0	11	107,65,109,131,142,112,110,81,114,81,2450,	0,2589,3198,7550,18130,21718,21926,33152,33378,40409,44245,
chr10	26993567	27037711	TCONS_00003622	0	+	26993567	27037711	255,0,0	10	103,109,131,142,112,110,81,114,81,2450,	0,647,4999,15579,19167,19375,30601,30827,37858,41694,
chr10	27023626	27037711	TCONS_00003623	0	+	27023626	27037711	255,0,0	5	428,81,114,81,2450,	0,542,768,7799,11635,
chr10	27443104	27477148	TCONS_00003627	0	+	27443104	27477148	255,0,0	12	1437,138,140,89,107,151,173,1140,139,114,102,1841,	0,4373,5443,6918,10888,11213,12926,15768,18945,26777,27304,32203,
chr10	27443105	27477148	TCONS_00003628	0	+	27443105	27477148	255,0,0	12	1436,138,140,89,107,151,173,1140,142,114,102,1841,	0,4372,5442,6917,10887,11212,12925,15767,18941,26776,27303,32202,
chr10	28821567	28910942	TCONS_00003637	0	+	28821567	28910942	255,0,0	14	369,37,196,107,116,113,309,246,114,149,119,190,128,2477,	0,1359,2923,50760,57097,58081,63094,75547,78069,79135,81928,83534,85018,86898,
chr10	28821706	28910942	TCONS_00003641	0	+	28821706	28910942	255,0,0	13	230,37,196,107,116,113,246,123,149,119,190,128,2477,	0,1220,2784,50621,56958,57942,75408,77921,78996,81789,83395,84879,86759,
chr10	28821997	28910942	TCONS_00003643	0	+	28821997	28910942	255,0,0	14	552,37,196,107,116,113,309,246,114,149,119,190,128,2477,	0,929,2493,50330,56667,57651,62664,75117,77639,78705,81498,83104,84588,86468,
chr10	28822044	28910942	TCONS_00003644	0	+	28822044	28910942	255,0,0	14	505,37,214,107,116,113,309,246,123,149,119,187,128,2477,	0,882,2428,50283,56620,57604,62617,75070,77583,78658,81451,83060,84541,86421,
chr1	110091207	110138905	TCONS_00003645_add	0	+	110091207	110138905	255,0,0	9	253,43,142,158,129,130,154,213,3939,	0,25151,25310,30618,33851,37630,38143,43457,43759,
chr10	28966404	28972412	TCONS_00003647	0	+	28966404	28972412	255,0,0	3	498,288,1501,	0,3782,4507,
chr10	29698474	29712270	TCONS_00003648	0	+	29698474	29712270	255,0,0	3	138,56,2851,	0,5811,10945,
chr10	29698498	29712270	TCONS_00003649	0	+	29698498	29712270	255,0,0	3	89,56,2851,	0,5787,10921,
chr10	30722927	30751289	TCONS_00003654	0	+	30722927	30751289	255,0,0	8	3408,359,168,262,107,153,247,1655,	0,4917,13783,16259,17639,24085,25256,26707,
chr10	30723120	30751289	TCONS_00003658	0	+	30723120	30751289	255,0,0	8	187,359,168,262,107,153,247,1655,	0,4724,13590,16066,17446,23892,25063,26514,
chr10	30723409	30751289	TCONS_00003659	0	+	30723409	30751289	255,0,0	9	268,209,359,168,262,107,153,247,1655,	0,2717,4435,13301,15777,17157,23603,24774,26225,
chr10	35415756	35468771	TCONS_00003666	0	+	35415756	35468771	255,0,0	4	365,124,98,710,	0,21539,52060,52305,
chr10	35484073	35502148	TCONS_00003670	0	+	35484073	35502148	255,0,0	3	69,157,1967,	0,11749,16108,
chr10	35484073	35502148	TCONS_00003671	0	+	35484073	35502148	255,0,0	4	69,36,157,1967,	0,6305,11749,16108,
chr10	35484793	35502148	TCONS_00003675	0	+	35484793	35502148	255,0,0	3	234,157,1967,	0,11029,15388,
chr10	35484809	35502148	TCONS_00003677	0	+	35484809	35502148	255,0,0	3	261,157,1967,	0,11013,15372,
chr10	35625875	35860842	TCONS_00003680	0	+	35625875	35860842	255,0,0	10	260,75,35,101,36,58,120,167,163,2861,	0,146456,164553,179575,189016,193025,193176,216071,229075,232106,
chr10	43277964	43327135	TCONS_00003684	0	+	43277964	43327135	255,0,0	23	314,209,191,80,189,143,122,188,140,758,102,158,82,74,177,189,181,59,123,148,176,162,822,	0,1845,2965,4651,7806,9110,9976,10440,11335,13957,14905,15951,19620,34082,34801,37719,37991,38417,39545,40601,41092,47744,48349,
chr10	43278239	43292680	TCONS_00003685	0	+	43278239	43292680	255,0,0	10	39,209,191,80,189,143,122,188,140,759,	0,1570,2690,4376,7531,8835,9701,10165,11060,13682,
chr10	43572525	43625769	TCONS_00003686	0	+	43572525	43625769	255,0,0	20	254,264,288,242,196,200,259,126,111,120,257,148,108,215,123,71,138,100,148,2210,	0,23381,25264,27874,29298,31953,34129,35021,35775,36478,37402,39506,41295,42453,43003,44868,46593,47805,49497,51034,
chr10	43633898	43680836	TCONS_00003687	0	+	43633898	43680836	255,0,0	8	117,914,217,102,1845,95,82,2139,	0,16446,20264,22043,23749,28553,37500,44799,
chr10	43633912	43680836	TCONS_00003688	0	+	43633912	43680836	255,0,0	8	103,914,217,102,179,95,82,2139,	0,16432,20250,22029,25401,28539,37486,44785,
chr1	110527356	110566562	TCONS_00003693_add	0	+	110527356	110566562	255,0,0	17	438,112,144,101,103,95,107,117,64,89,71,95,99,69,79,121,2267,	0,24299,26479,27627,28162,30028,30690,31609,31932,32760,33211,33638,33817,34316,34813,35996,36939,
chr10	45455202	45490271	TCONS_00003695	0	+	45455202	45490271	255,0,0	11	112,100,76,143,173,158,102,52,122,98,1555,	0,10410,12018,22766,24186,25058,29519,29915,31193,32150,33514,
chr10	45455204	45490271	TCONS_00003696	0	+	45455204	45490271	255,0,0	11	110,100,76,143,92,158,102,52,122,98,1555,	0,10408,12016,22764,24265,25056,29517,29913,31191,32148,33512,
chr10	45495393	45500741	TCONS_00003699	0	+	45495393	45500741	255,0,0	2	1033,2014,	0,3334,
chr10	45869633	45941743	TCONS_00003700	0	+	45869633	45941743	255,0,0	14	244,199,82,123,107,173,147,204,87,179,122,101,171,788,	0,8297,21669,38005,49855,50774,54432,66244,67158,68852,69230,69542,69930,71322,
chr10	46222656	46288409	TCONS_00003708	0	+	46222656	46288409	255,0,0	30	112,123,165,63,174,94,62,48,111,88,72,119,58,60,180,128,102,132,170,103,153,183,129,81,123,63,213,621,178,701,	0,208,1653,10774,12864,16181,17612,19391,22887,23542,24273,25379,25971,27277,27727,29803,36179,38470,42240,46047,50064,51744,57356,57612,58300,59403,59826,61662,63147,65052,
chr10	46222671	46288409	TCONS_00003710	0	+	46222671	46288409	255,0,0	31	97,123,165,63,174,94,62,48,111,88,72,119,58,60,180,128,70,102,132,170,103,153,183,129,81,123,63,213,621,178,701,	0,193,1638,10759,12849,16166,17597,19376,22872,23527,24258,25364,25956,27262,27712,29788,32108,36164,38455,42225,46032,50049,51729,57341,57597,58285,59388,59811,61647,63132,65037,
chr10	46222863	46288409	TCONS_00003712	0	+	46222863	46288409	255,0,0	30	124,165,63,174,94,62,48,111,88,72,119,58,60,178,130,87,102,132,170,103,153,183,129,81,123,63,213,621,178,701,	0,1446,10567,12657,15974,17405,19184,22680,23335,24066,25172,25764,27070,27520,29594,31899,35972,38263,42033,45840,49857,51537,57149,57405,58093,59196,59619,61455,62940,64845,
chr10	47396228	47398986	TCONS_00003718	0	+	47396228	47398986	255,0,0	2	524,49,	0,2709,
chr10	47894438	47949416	TCONS_00003719	0	+	47894438	47949416	255,0,0	28	196,174,94,62,48,111,88,72,119,58,60,180,128,87,102,132,170,103,153,183,129,81,123,63,213,621,178,703,	0,2217,5512,6942,8720,12239,12894,13625,14731,15323,16610,17061,19137,21439,25503,27796,31564,35356,39368,41049,46579,46835,47523,48626,49049,50885,52370,54275,
chr10	47894571	47908274	TCONS_00003720	0	+	47894571	47908274	255,0,0	8	63,174,94,62,48,111,88,211,	0,2084,5379,6809,8587,12106,12761,13492,
chr10	47894571	47949416	TCONS_00003721	0	+	47894571	47949416	255,0,0	27	63,174,94,62,48,111,88,72,119,58,60,180,128,87,102,132,170,103,153,183,129,81,1166,213,621,178,703,	0,2084,5379,6809,8587,12106,12761,13492,14598,15190,16477,16928,19004,21306,25370,27663,31431,35223,39235,40916,46446,46702,47390,48916,50752,52237,54142,
chr10	47894571	47949416	TCONS_00003722	0	+	47894571	47949416	255,0,0	27	63,174,94,62,48,111,88,72,119,58,60,180,128,102,132,170,103,153,183,129,81,123,63,213,621,178,703,	0,2084,5379,6809,8587,12106,12761,13492,14598,15190,16477,16928,19004,25370,27663,31431,35223,39235,40916,46446,46702,47390,48493,48916,50752,52237,54142,
chr10	47894571	47949416	TCONS_00003723	0	+	47894571	47949416	255,0,0	28	63,174,94,62,48,111,88,72,119,58,60,180,128,87,102,132,170,103,153,183,129,81,82,63,213,621,178,703,	0,2084,5379,6809,8587,12106,12761,13492,14598,15190,16477,16928,19004,21306,25370,27663,31431,35223,39235,40916,46446,46702,47390,48493,48916,50752,52237,54142,
chr10	47909760	47949416	TCONS_00003724	0	+	47909760	47949416	255,0,0	19	59,60,180,128,87,102,132,170,103,153,183,129,81,123,63,213,621,178,703,	0,1288,1739,3815,6117,10181,12474,16242,20034,24046,25727,31257,31513,32201,33304,33727,35563,37048,38953,
chr10	49514736	49643184	TCONS_00003726	0	+	49514736	49643184	255,0,0	14	128,194,69,171,130,59,139,166,72,183,125,64,78,263,	0,1401,19203,94918,98158,103185,103336,113461,117820,119194,119686,120386,124499,128185,
chr10	49514772	49643184	TCONS_00003727	0	+	49514772	49643184	255,0,0	13	92,194,171,130,59,139,166,72,183,125,64,78,263,	0,1365,94882,98122,103149,103300,113425,117784,119158,119650,120350,124463,128149,
chr10	49892624	50191016	TCONS_00003729	0	+	49892624	50191016	255,0,0	62	422,251,115,107,135,190,190,158,453,105,191,581,94,215,95,235,77,222,179,232,146,112,191,153,74,162,92,100,206,170,126,165,204,115,158,239,119,186,137,78,207,52,167,149,121,86,63,43,120,118,110,154,92,213,148,185,159,180,183,85,112,463,	0,25136,35431,36681,38853,41301,42890,44852,46530,49351,51300,58388,75767,89878,91132,92170,92839,94031,95361,102059,103950,105294,106147,111718,118706,120680,121424,123279,125950,126959,129377,132665,135654,136482,137800,142091,144198,146120,147993,182685,188911,190509,192453,205999,212874,215641,217221,257226,258750,261460,262280,272549,275142,279262,281946,284484,285551,290282,292217,293729,29…
chr10	49892802	50191016	TCONS_00003731	0	+	49892802	50191016	255,0,0	63	244,84,251,115,107,135,190,190,158,453,105,191,581,94,215,95,235,77,222,179,232,146,112,191,153,74,162,92,100,206,170,126,165,204,115,158,239,119,186,137,78,207,52,167,149,121,86,63,43,120,118,110,154,92,213,148,164,159,180,183,85,112,463,	0,7514,24958,35253,36503,38675,41123,42712,44674,46352,49173,51122,58210,75589,89700,90954,91992,92661,93853,95183,101881,103772,105116,105969,111540,118528,120502,121246,123101,125772,126781,129199,132487,135476,136304,137622,141913,144020,145942,147815,182507,188733,190331,192275,205821,212696,215463,217043,257048,258572,261282,262102,272371,274964,279084,281768,284327,285373,290104,292039,2935…
chr10	49893101	50191016	TCONS_00003732	0	+	49893101	50191016	255,0,0	62	246,251,115,107,135,190,190,158,453,105,191,581,94,215,95,235,77,222,179,232,146,112,191,153,74,162,92,100,206,170,126,165,204,115,158,239,119,186,137,78,207,52,167,149,121,86,63,43,120,118,110,154,92,213,148,185,159,180,183,85,112,463,	0,24659,34954,36204,38376,40824,42413,44375,46053,48874,50823,57911,75290,89401,90655,91693,92362,93554,94884,101582,103473,104817,105670,111241,118229,120203,120947,122802,125473,126482,128900,132188,135177,136005,137323,141614,143721,145643,147516,182208,188434,190032,191976,205522,212397,215164,216744,256749,258273,260983,261803,272072,274665,278785,281469,284007,285074,289805,291740,293252,29…
chr10	49893176	50191016	TCONS_00003733	0	+	49893176	50191016	255,0,0	63	171,84,251,115,107,135,190,190,158,453,105,191,581,94,215,95,235,77,222,179,232,146,112,191,153,74,162,92,100,206,170,126,165,204,115,158,239,119,186,137,78,207,52,167,149,121,86,63,43,120,118,110,154,92,213,148,185,159,180,183,85,112,463,	0,7140,24584,34879,36129,38301,40749,42338,44300,45978,48799,50748,57836,75215,89326,90580,91618,92287,93479,94809,101507,103398,104742,105595,111166,118154,120128,120872,122727,125398,126407,128825,132113,135102,135930,137248,141539,143646,145568,147441,182133,188359,189957,191901,205447,212322,215089,216669,256674,258198,260908,261728,271997,274590,278710,281394,283932,284999,289730,291665,2931…
chr10	49893399	50191016	TCONS_00003735	0	+	49893399	50191016	255,0,0	61	178,251,115,107,135,190,190,158,453,105,191,581,94,215,95,235,77,222,179,232,146,112,191,153,74,162,92,100,206,170,126,165,115,158,239,119,186,137,78,207,52,167,149,121,86,63,43,120,118,110,154,92,213,148,185,159,180,183,85,112,463,	0,24361,34656,35906,38078,40526,42115,44077,45755,48576,50525,57613,74992,89103,90357,91395,92064,93256,94586,101284,103175,104519,105372,110943,117931,119905,120649,122504,125175,126184,128602,131890,135707,137025,141316,143423,145345,147218,181910,188136,189734,191678,205224,212099,214866,216446,256451,257975,260685,261505,271774,274367,278487,281171,283709,284776,289507,291442,292954,296012,29…
chr10	51187919	51192033	TCONS_00003736	0	+	51187919	51192033	255,0,0	3	639,178,705,	0,1503,3409,
chr10	51371400	51397326	TCONS_00003738	0	+	51371400	51397326	255,0,0	7	246,59,94,85,59,111,76,	0,2969,10038,10361,12898,16252,25850,
chr10	51565178	51591471	TCONS_00003740	0	+	51565178	51591471	255,0,0	10	118,155,141,89,109,90,144,984,141,2247,	0,13949,15377,15701,16091,17004,17617,19437,21092,24046,
chr10	51572402	51591471	TCONS_00003749	0	+	51572402	51591471	255,0,0	10	90,155,141,89,109,90,144,984,141,2247,	0,6725,8153,8477,8867,9780,10393,12213,13868,16822,
chr10	51827670	51893264	TCONS_00003757	0	+	51827670	51893264	255,0,0	29	317,165,63,174,94,62,48,111,88,72,119,58,60,180,128,102,132,170,103,153,183,129,81,123,63,213,621,178,699,	0,1636,10764,12847,16161,17586,19364,22865,23520,24251,25357,25949,27237,27688,29764,36131,38423,42190,45984,49995,51676,57202,57458,58146,59249,59672,61508,62990,64895,
chr10	51827695	51893264	TCONS_00003758	0	+	51827695	51893264	255,0,0	31	73,123,156,63,174,94,62,48,111,88,72,119,58,60,180,128,87,102,132,170,103,153,183,129,81,123,63,213,621,178,699,	0,169,1620,10739,12822,16136,17561,19339,22840,23495,24226,25332,25924,27212,27663,29739,32042,36106,38398,42165,45959,49970,51651,57177,57433,58121,59224,59647,61483,62965,64870,
chr10	54073032	54077101	TCONS_00003763	0	+	54073032	54077101	255,0,0	5	238,253,163,141,788,	0,1152,1650,3022,3281,
chr10	60094778	60130910	TCONS_00003766	0	+	60094778	60130910	255,0,0	7	207,64,32,78,106,94,2431,	0,26319,26476,28590,29752,32904,33701,
chr10	62538221	62555225	TCONS_00003769	0	+	62538221	62555225	255,0,0	8	107,62,157,124,171,164,142,1591,	0,1677,6241,7200,9596,13426,13684,15413,
chr10	63660338	63856695	TCONS_00003770	0	+	63660338	63856695	255,0,0	10	1151,255,226,231,113,202,53,98,199,6075,	0,1579,39603,99511,150308,156537,158663,169120,185122,190282,
chr10	63808812	63856695	TCONS_00003771	0	+	63808812	63856695	255,0,0	7	430,113,202,53,98,199,6075,	0,1834,8063,10189,20646,36648,41808,
chr10	65281219	65384854	TCONS_00003772	0	+	65281219	65384854	255,0,0	8	118,73,77,121,114,148,146,4282,	0,44878,73318,76564,77710,88727,98195,99353,
chr10	69644420	69678306	TCONS_00003773	0	+	69644420	69678306	255,0,0	9	489,117,242,153,148,80,187,558,2285,	0,2754,4219,6739,22126,23382,24592,27810,31601,
chr10	69647172	69678306	TCONS_00003775	0	+	69647172	69678306	255,0,0	8	119,242,153,148,80,187,558,2285,	0,1467,3987,19374,20630,21840,25058,28849,
chr10	70091743	70105654	TCONS_00003776	0	+	70091743	70105654	255,0,0	10	230,135,139,185,87,116,136,96,93,3920,	0,5212,5871,6516,7153,7453,9187,9598,9772,9991,
chr10	70091765	70105654	TCONS_00003777	0	+	70091765	70105654	255,0,0	10	208,135,139,140,87,116,136,96,93,3920,	0,5190,5849,6494,7131,7431,9165,9576,9750,9969,
chr10	70091811	70105654	TCONS_00003782	0	+	70091811	70105654	255,0,0	10	181,135,139,185,87,116,136,96,93,3920,	0,5144,5803,6448,7085,7385,9119,9530,9704,9923,
chr10	70480960	70552567	TCONS_00003784	0	+	70480960	70552567	255,0,0	25	79,123,173,45,33,194,115,193,130,162,226,114,167,211,84,186,192,240,112,83,147,121,186,206,1604,	0,1251,15672,16641,19425,21172,25957,26170,27932,28320,32648,33510,34166,35069,36090,39803,44684,50002,51784,64932,65342,66723,66939,68506,70003,
chr10	70480962	70552567	TCONS_00003785	0	+	70480962	70552567	255,0,0	25	83,123,173,45,33,194,115,193,130,162,226,114,167,211,84,186,192,240,112,83,147,121,186,206,1604,	0,1249,15670,16639,19423,21170,25955,26168,27930,28318,32646,33508,34164,35067,36088,39801,44682,50000,51782,64930,65340,66721,66937,68504,70001,
chr10	70661032	70707120	TCONS_00003787	0	+	70661032	70707120	255,0,0	15	195,297,76,179,118,186,146,150,162,120,74,160,135,45,1013,	0,5434,9030,9791,11885,12114,12782,18555,32922,33522,34729,35659,39783,41936,45075,
chr10	70661996	70707120	TCONS_00003788	0	+	70661996	70707120	255,0,0	16	31,112,297,76,179,118,186,146,150,162,120,74,160,135,45,1013,	0,3985,4470,8066,8827,10921,11150,11818,17591,31958,32558,33765,34695,38819,40972,44111,
chr10	70715915	70745088	TCONS_00003789	0	+	70715915	70745088	255,0,0	15	153,444,76,179,118,186,146,150,162,120,74,160,135,45,2790,	0,3646,5922,7131,9217,10858,12816,14041,15731,17385,18510,21369,22682,25377,26383,
chr10	70748354	70776726	TCONS_00003790	0	+	70748354	70776726	255,0,0	7	660,99,80,184,85,116,1430,	0,11825,16447,17133,20242,22301,26942,
chr10	70760178	70776726	TCONS_00003791	0	+	70760178	70776726	255,0,0	6	100,80,184,85,116,1430,	0,4623,5309,8418,10477,15118,
chr10	70845171	70864623	TCONS_00003802	0	+	70845171	70864623	255,0,0	4	23,209,148,997,	0,2612,11668,18455,
chr10	70883930	70932636	TCONS_00003808	0	+	70883930	70932636	255,0,0	9	106,150,76,157,165,107,69,143,1725,	0,8723,31637,32832,33872,38231,41867,44314,46981,
chr10	71078573	71161682	TCONS_00003811	0	+	71078573	71161682	255,0,0	18	193,163,149,120,96,100,184,156,234,305,149,120,96,100,184,156,234,936,	0,25009,41079,45965,49718,50419,50623,58116,61044,63669,65515,65978,67505,70379,73307,76132,79777,82173,
chr10	71211163	71267509	TCONS_00003812	0	+	71211163	71267509	255,0,0	8	283,186,75,96,117,48,117,925,	0,32283,33733,44186,46872,53030,54716,55421,
chr10	72163890	72188477	TCONS_00003813	0	+	72163890	72188477	255,0,0	3	412,186,7006,	0,15779,17581,
chr10	72238369	72328197	TCONS_00003814	0	+	72238369	72328197	255,0,0	20	446,214,103,180,165,161,76,152,100,105,96,129,117,156,183,141,72,141,156,1861,	0,47309,50615,51275,52676,54007,54381,55308,55811,56125,59197,59666,60278,60478,60966,62488,62849,68692,85750,87967,
chr10	72238634	72328197	TCONS_00003815	0	+	72238634	72328197	255,0,0	20	292,214,103,180,165,161,76,152,100,105,96,129,117,156,183,141,72,141,156,1861,	0,47044,50350,51010,52411,53742,54116,55043,55546,55860,58932,59401,60013,60213,60701,62223,62584,68427,85485,87702,
chr10	72503097	72522192	TCONS_00003816	0	+	72503097	72522192	255,0,0	10	340,124,81,164,169,133,208,130,111,2077,	0,724,1884,6480,8136,8753,10458,14620,14833,17018,
chr10	72509457	72522192	TCONS_00003817	0	+	72509457	72522192	255,0,0	7	284,169,133,208,130,111,2077,	0,1776,2393,4098,8260,8473,10658,
chr10	72575674	72641239	TCONS_00003819	0	+	72575674	72641239	255,0,0	15	208,70,166,68,148,77,129,89,106,99,150,239,147,121,4288,	0,892,28555,35225,38790,41696,43453,52427,53874,55130,55919,57433,59484,60623,61277,
chr10	72576093	72641239	TCONS_00003824	0	+	72576093	72641239	255,0,0	15	158,70,166,68,148,77,129,89,106,99,150,239,147,121,4288,	0,473,28136,34806,38371,41277,43034,52008,53455,54711,55500,57014,59065,60204,60858,
chr10	72972402	73062610	TCONS_00003825	0	+	72972402	73062610	255,0,0	17	419,225,144,104,181,168,165,33,195,390,88,169,234,150,165,182,3742,	0,67175,72074,72680,74043,74952,75922,76312,78269,78786,79821,80759,81054,83165,83932,85263,86466,
chr10	73079008	73123586	TCONS_00003826	0	+	73079008	73123586	255,0,0	6	59,299,83,227,163,1876,	0,3504,24957,32310,36829,42702,
chr10	73079027	73126362	TCONS_00003827	0	+	73079027	73126362	255,0,0	7	40,299,83,227,163,1433,2160,	0,3485,24938,32291,36810,42683,45175,
chr10	73975539	73995709	TCONS_00003830	0	+	73975539	73995709	255,0,0	4	357,169,75,2951,	0,8106,14584,17219,
chr10	73975757	73995709	TCONS_00003831	0	+	73975757	73995709	255,0,0	4	73,169,75,2951,	0,7888,14366,17001,
chr10	73979504	73995709	TCONS_00003832	0	+	73979504	73995709	255,0,0	4	633,169,75,2951,	0,4141,10619,13254,
chr10	74033685	74036022	TCONS_00003834	0	+	74033685	74036022	255,0,0	3	133,265,1570,	0,229,767,
chr10	74451835	74647681	TCONS_00003835	0	+	74451835	74647681	255,0,0	8	224,70,171,105,161,204,117,2179,	0,142281,167099,168345,176625,179299,192188,193667,
chr10	74551919	74647681	TCONS_00003849	0	+	74551919	74647681	255,0,0	8	45,70,171,105,161,204,117,2179,	0,42197,67015,68261,76541,79215,92104,93583,
chr10	75495160	75539998	TCONS_00003852	0	+	75495160	75539998	255,0,0	27	216,83,274,200,136,173,369,137,112,128,139,116,125,192,94,117,171,97,146,139,119,180,192,90,2087,626,4700,	0,1845,8761,11402,15705,24219,24615,25310,28087,28453,30048,30397,30683,30947,31357,31651,32434,33407,33604,33944,34212,34433,34877,35306,35552,37787,40138,
chr10	75495208	75531920	TCONS_00003853	0	+	75495208	75531920	255,0,0	26	168,83,274,87,200,136,173,369,137,112,128,139,116,125,192,94,117,171,97,146,139,119,180,192,90,1208,	0,1797,8713,11179,11354,15657,24171,24567,25262,28039,28405,30000,30349,30635,30899,31309,31603,32386,33359,33556,33896,34164,34385,34829,35258,35504,
chr10	75541727	75543407	TCONS_00003855	0	+	75541727	75543407	255,0,0	3	230,119,576,	0,353,1104,
chr10	75545350	75562356	TCONS_00003857	0	+	75545350	75562356	255,0,0	26	494,154,95,173,108,82,121,202,176,994,132,180,184,84,125,241,159,229,290,224,489,160,177,120,179,1283,	0,3077,3503,3774,4124,4363,4579,5382,5731,6266,7995,8272,8554,8963,9946,11181,11520,11784,12188,12637,13409,14418,14703,15047,15424,15723,
chr10	75545517	75562356	TCONS_00003859	0	+	75545517	75562356	255,0,0	26	327,154,95,173,108,82,121,202,176,994,132,180,184,99,125,241,159,229,290,224,489,184,177,120,179,1283,	0,2910,3336,3607,3957,4196,4412,5215,5564,6099,7828,8105,8387,8781,9779,11014,11353,11617,12021,12470,13242,14251,14536,14880,15257,15556,
chr10	75670897	75677360	TCONS_00003867	0	+	75670897	75677360	255,0,0	11	79,88,28,108,175,92,220,149,141,149,1214,	0,385,901,1075,1784,2150,2399,2840,3636,4111,5249,
chr10	75757685	75883671	TCONS_00003869	0	+	75757685	75883671	255,0,0	21	448,71,151,109,123,161,91,148,154,176,191,200,129,150,109,303,125,186,204,105,5891,	0,45155,72742,73047,74802,76815,84526,85438,91268,92095,96343,97728,99276,103020,105892,107123,109302,111043,116256,116867,120095,
chr10	75910981	76470391	TCONS_00003874	0	+	75910981	76470391	255,0,0	11	120,75,54,79,173,109,171,36,115,87,2313,	0,49540,73314,163443,242917,247247,374032,438058,449155,518959,557097,
chr10	75936488	76470391	TCONS_00003875	0	+	75936488	76470391	255,0,0	11	156,75,54,79,173,109,171,36,115,87,2313,	0,24033,47807,137936,217410,221740,348525,412551,423648,493452,531590,
chr10	76969931	76991241	TCONS_00003878	0	+	76969931	76991241	255,0,0	10	39,56,69,50,153,53,228,151,58,586,	0,960,2056,3847,8889,9130,10569,12078,19470,20724,
chr10	76970404	76991241	TCONS_00003881	0	+	76970404	76991241	255,0,0	11	292,56,69,50,104,153,53,228,151,58,586,	0,487,1583,3374,7241,8416,8657,10096,11605,18997,20251,
chr10	77549719	78317376	TCONS_00003887	0	+	77549719	78317376	255,0,0	6	53,127,140,118,85,410,	0,246046,257202,268704,534439,767247,
chr10	77795769	77825337	TCONS_00003893	0	+	77795769	77825337	255,0,0	4	123,140,118,33,	0,11152,22654,29535,
chr10	79793508	79800556	TCONS_00003894	0	+	79793508	79800556	255,0,0	6	154,66,210,111,22,184,	0,1601,1760,3443,6453,6864,
chr10	79793590	79808781	TCONS_00003895	0	+	79793590	79808781	255,0,0	6	72,66,210,111,133,43,	0,1519,1678,3361,6782,15148,
chr10	80878670	81076323	TCONS_00003913	0	+	80878670	81076323	255,0,0	23	111,96,81,109,114,106,145,115,218,199,273,183,78,175,142,211,106,161,68,69,245,167,3925,	0,20768,43139,82670,89422,97255,158267,170861,172045,173244,174467,177557,178699,179492,180136,181818,183193,185101,186250,186619,187186,188491,193728,
chr10	81003410	81076323	TCONS_00003919	0	+	81003410	81076323	255,0,0	19	85,145,115,218,199,291,183,78,175,142,211,106,161,68,69,245,167,261,3925,	0,33527,46121,47305,48504,49709,52817,53959,54752,55396,57078,58453,60361,61510,61879,62446,63751,67270,68988,
chr10	81003410	81076323	TCONS_00003920	0	+	81003410	81076323	255,0,0	18	85,145,115,218,199,291,183,78,175,142,211,106,161,68,69,245,167,3925,	0,33527,46121,47305,48504,49709,52817,53959,54752,55396,57078,58453,60361,61510,61879,62446,63751,68988,
chr10	81048355	81076323	TCONS_00003924	0	+	81048355	81076323	255,0,0	18	303,115,218,199,291,183,78,175,142,211,106,161,68,69,245,167,261,3925,	0,1176,2360,3559,4764,7872,9014,9807,10451,12133,13508,15416,16565,16934,17501,18806,22325,24043,
chr10	81107178	81115075	TCONS_00003925	0	+	81107178	81115075	255,0,0	6	321,31,89,97,76,1613,	0,1653,2242,4064,4894,6284,
chr10	82214036	82283097	TCONS_00003931	0	+	82214036	82283097	255,0,0	10	91,141,98,51,147,171,126,45,120,5437,	0,14266,34936,50447,52947,55020,57863,59738,61923,63624,
chr10	82214051	82283097	TCONS_00003932	0	+	82214051	82283097	255,0,0	9	76,98,51,147,171,126,45,120,5437,	0,34921,50432,52932,55005,57848,59723,61908,63609,
chr10	82219033	82283097	TCONS_00003940	0	+	82219033	82283097	255,0,0	10	230,141,98,51,147,171,126,45,120,5437,	0,9269,29939,45450,47950,50023,52866,54741,56926,58627,
chr10	85899272	85908596	TCONS_00003942	0	+	85899272	85908596	255,0,0	6	77,218,100,112,142,111,	0,1895,3138,4478,5358,9213,
chr10	85899272	85914587	TCONS_00003943	0	+	85899272	85914587	255,0,0	9	77,168,100,112,142,109,189,172,2568,	0,1945,3138,4478,5358,9213,10538,11192,12747,
chr10	86088354	86278413	TCONS_00003944	0	+	86088354	86278413	255,0,0	10	210,1456,197,91,163,196,84,87,90,5209,	0,42415,45020,89172,97132,109913,135334,141773,148976,184850,
chr10	86130768	86278413	TCONS_00003946	0	+	86130768	86278413	255,0,0	9	1457,197,91,163,196,84,87,90,5209,	0,2606,46758,54718,67499,92920,99359,106562,142436,
chr10	88854808	88951217	TCONS_00003949	0	+	88854808	88951217	255,0,0	10	197,56,1530,108,195,135,207,229,116,977,	0,1882,56298,62996,75426,75788,80837,85023,92033,95432,
chr10	88854938	88951217	TCONS_00003950	0	+	88854938	88951217	255,0,0	9	67,56,1530,108,195,135,229,116,977,	0,1752,56168,62866,75296,75658,84893,91903,95302,
chr10	88863404	88951217	TCONS_00003951	0	+	88863404	88951217	255,0,0	9	66,1530,108,195,135,207,229,116,977,	0,47702,54400,66830,67192,72241,76427,83437,86836,
chr10	89264120	89313167	TCONS_00003952	0	+	89264120	89313167	255,0,0	5	1189,198,98,134,1329,	0,3972,8760,16672,47718,
chr10	89268089	89313167	TCONS_00003953	0	+	89268089	89313167	255,0,0	4	201,98,134,1329,	0,4791,12703,43749,
chr10	89419420	89507533	TCONS_00003954	0	+	89419420	89507533	255,0,0	12	345,118,236,139,119,114,112,206,136,269,230,1945,	0,49532,53411,54380,55081,55321,56068,67620,81571,83709,85338,86168,
chr10	89468951	89507533	TCONS_00003955	0	+	89468951	89507533	255,0,0	11	119,236,139,119,114,112,206,136,269,230,1945,	0,3880,4849,5550,5790,6537,18089,32040,34178,35807,36637,
chr10	89520028	89563520	TCONS_00003956	0	+	89520028	89563520	255,0,0	3	213,57,1988,	0,10044,41504,
chr10	89520135	89563520	TCONS_00003957	0	+	89520135	89563520	255,0,0	4	106,57,39,1988,	0,9937,36662,41397,
chr10	89529356	89563520	TCONS_00003958	0	+	89529356	89563520	255,0,0	4	24,57,39,1988,	0,716,27441,32176,
chr10	89623321	89731867	TCONS_00003959	0	+	89623321	89731867	255,0,0	9	984,85,45,44,239,142,167,225,6824,	0,30460,61948,67481,69448,88553,94288,97329,101722,
chr10	90640010	90683789	TCONS_00003960	0	+	90640010	90683789	255,0,0	11	385,83,218,76,96,358,125,138,113,100,865,	0,21402,25189,28448,30662,32847,34280,36426,41029,42083,42914,
chr10	90642335	90683789	TCONS_00003961	0	+	90642335	90683789	255,0,0	11	44,83,218,76,96,358,125,138,113,100,865,	0,19077,22864,26123,28337,30522,31955,34101,38704,39758,40589,
chr10	90653952	90683789	TCONS_00003962	0	+	90653952	90683789	255,0,0	11	153,83,218,76,96,358,125,138,113,100,865,	0,7460,11247,14506,16720,18905,20338,22484,27087,28141,28972,
chr10	90750154	90776911	TCONS_00003965	0	+	90750154	90776911	255,0,0	10	38,361,166,138,109,62,63,83,25,3036,	0,148,12631,17302,18491,20141,20355,21601,22945,23721,
chr10	91038647	91069530	TCONS_00003969	0	+	91038647	91069530	255,0,0	5	5001,229,487,152,3812,	0,6145,13096,23086,27071,
chr10	91038647	91069530	TCONS_00003970	0	+	91038647	91069530	255,0,0	3	2717,20065,3812,	0,3173,27071,
chr10	91087430	91101587	TCONS_00003971	0	+	91087430	91101587	255,0,0	3	37,103,3170,	0,302,10987,
chr10	91087558	91101587	TCONS_00003972	0	+	91087558	91101587	255,0,0	3	277,281,3170,	0,4545,10859,
chr10	91087690	91101587	TCONS_00003973	0	+	91087690	91101587	255,0,0	2	145,3170,	0,10727,
chr10	91150974	91163836	TCONS_00003974	0	+	91150974	91163836	255,0,0	3	1207,183,1799,	0,1317,11063,
chr10	91152342	91163836	TCONS_00003975	0	+	91152342	91163836	255,0,0	3	132,109,1799,	0,7309,9695,
chr10	91173615	91182366	TCONS_00003976	0	+	91173615	91182366	255,0,0	2	945,5405,	0,3346,
chr10	92759492	92771695	TCONS_00003982	0	+	92759492	92771695	255,0,0	3	111,208,1693,	0,6409,10510,
chr10	92759500	92771695	TCONS_00003983	0	+	92759500	92771695	255,0,0	2	103,5794,	0,6401,
chr10	92922747	92987801	TCONS_00003984	0	+	92922747	92987801	255,0,0	3	91,295,708,	0,59698,64346,
chr10	92922754	93044086	TCONS_00003985	0	+	92922754	93044086	255,0,0	10	84,295,97,56,60,149,99,90,60,6061,	0,59691,77486,85507,85667,88294,98328,101433,108640,115271,
chr10	92922784	93044086	TCONS_00003986	0	+	92922784	93044086	255,0,0	9	54,295,97,56,60,149,99,90,6061,	0,59661,77456,85477,85637,88264,98298,101403,115241,
chr10	92980386	93044086	TCONS_00003988	0	+	92980386	93044086	255,0,0	10	207,295,97,56,60,149,99,90,60,6061,	0,2059,19854,27875,28035,30662,40696,43801,51008,57639,
chr10	92980402	92987801	TCONS_00003989	0	+	92980402	92987801	255,0,0	3	191,295,708,	0,2043,6691,
chr10	93559521	93625290	TCONS_00003994	0	+	93559521	93625290	255,0,0	27	21,225,96,37,76,95,67,187,122,92,79,172,80,146,166,220,110,189,253,83,121,98,75,106,187,157,2597,	0,13218,17369,19505,19717,20174,22531,27252,28520,31158,31338,34088,37154,40796,41518,42407,45154,45987,48618,49747,51451,55264,55849,57660,59697,62234,63172,
chr10	93695411	93791126	TCONS_00003998	0	+	93695411	93791126	255,0,0	37	126,115,147,164,137,130,69,218,96,177,141,125,121,105,150,143,175,204,427,191,154,110,202,149,153,122,168,78,130,142,131,126,153,212,160,171,2580,	0,4297,6767,15748,18082,20873,21570,23410,24130,24323,26883,28422,30982,44799,45988,46428,46932,48546,53499,56464,58039,58880,60714,61948,72468,73174,73386,75418,75631,78012,78244,80685,83128,89101,90937,91475,93135,
chr10	93695412	93791126	TCONS_00003999	0	+	93695412	93791126	255,0,0	37	125,115,147,164,137,130,69,90,96,177,141,125,121,105,150,143,175,204,427,191,154,110,202,149,153,122,168,78,130,142,131,126,153,212,160,171,2580,	0,4296,6766,15747,18081,20872,21569,23409,24129,24322,26882,28421,30981,44798,45987,46427,46931,48545,53498,56463,58038,58879,60713,61947,72467,73173,73385,75417,75630,78011,78243,80684,83127,89100,90936,91474,93134,
chr10	94050368	94113757	TCONS_00004001	0	+	94050368	94113757	255,0,0	6	918,203,131,184,167,2910,	0,20523,50061,58737,59059,60479,
chr10	94352846	94415126	TCONS_00004002	0	+	94352846	94415126	255,0,0	22	363,133,98,79,186,125,91,243,96,89,88,189,208,173,126,159,107,280,223,152,117,1705,	0,13175,13529,14069,15930,16295,19950,20287,23647,28295,35718,37086,39396,40533,44094,44297,46704,52273,55122,56745,57311,60575,
chr10	94449618	94455404	TCONS_00004003	0	+	94449618	94455404	255,0,0	4	486,179,51,1101,	0,2506,2840,4685,
chr10	94452057	94455404	TCONS_00004004	0	+	94452057	94455404	255,0,0	3	246,51,1101,	0,401,2246,
chr10	94608206	94819288	TCONS_00004005	0	+	94608206	94819288	255,0,0	22	185,172,48,91,46,205,156,69,84,47,121,72,98,106,110,112,135,180,142,74,113,1309,	0,44899,46344,46480,51149,60977,67308,71532,79889,85694,85860,87364,92277,99824,103823,106180,107130,125603,149024,165744,208474,209773,
chr10	95256404	95290355	TCONS_00004006	0	+	95256404	95290355	255,0,0	9	276,195,276,69,151,314,72,126,2649,	0,3392,6465,10340,18757,20287,22229,23034,31302,
chr10	95326344	95350076	TCONS_00004007	0	+	95326344	95350076	255,0,0	3	700,129,3100,	0,9503,20632,
chr10	97515896	97637227	TCONS_00004010	0	+	97515896	97637227	255,0,0	10	116,128,118,151,160,240,261,114,138,11294,	0,67097,83551,86204,88336,89217,91306,104329,108584,110037,
chr10	97802351	97820626	TCONS_00004011	0	+	97802351	97820626	255,0,0	6	641,110,211,300,160,3040,	0,1758,7661,14106,14493,15235,
chr10	97802802	97820626	TCONS_00004012	0	+	97802802	97820626	255,0,0	6	674,110,211,300,160,3040,	0,1307,7210,13655,14042,14784,
chr10	97803421	97820626	TCONS_00004014	0	+	97803421	97820626	255,0,0	6	476,110,211,300,160,3040,	0,688,6591,13036,13423,14165,
chr10	99186886	99193302	TCONS_00004020	0	+	99186886	99193302	255,0,0	4	125,275,181,1191,	0,3249,3825,5225,
chr10	99205944	99230006	TCONS_00004025	0	+	99205944	99230006	255,0,0	12	166,248,195,89,29,134,48,86,124,71,574,58,	0,5483,5902,6227,6707,7342,7611,8526,9472,9786,10589,24004,
chr10	99258457	99330957	TCONS_00004028	0	+	99258457	99330957	255,0,0	3	573,228,1063,	0,69213,71437,
chr10	99400486	99436163	TCONS_00004029	0	+	99400486	99436163	255,0,0	9	448,201,132,154,62,100,134,60,2826,	0,10211,15555,16091,22177,24155,25708,26331,32851,
chr10	99473759	99478274	TCONS_00004030	0	+	99473759	99478274	255,0,0	2	1983,1324,	0,3191,
chr10	99894377	100004806	TCONS_00004033	0	+	99894377	100004806	255,0,0	9	86,93,105,1799,176,71,96,141,959,	0,28262,28672,73480,96891,99825,100804,101403,109470,
chr10	99894384	100004806	TCONS_00004034	0	+	99894384	100004806	255,0,0	11	79,55,93,105,97,1799,176,71,96,141,959,	0,21465,28255,28665,51839,73473,96884,99818,100797,101396,109463,
chr10	99894410	100004806	TCONS_00004035	0	+	99894410	100004806	255,0,0	10	53,93,105,97,1799,176,71,96,141,959,	0,28229,28639,51813,73447,96858,99792,100771,101370,109437,
chr10	99894434	100004806	TCONS_00004036	0	+	99894434	100004806	255,0,0	10	29,55,93,105,1799,176,71,96,141,959,	0,21415,28205,28615,73423,96834,99768,100747,101346,109413,
chr10	99922578	100004806	TCONS_00004038	0	+	99922578	100004806	255,0,0	8	154,105,1799,176,71,96,141,959,	0,471,45279,68690,71624,72603,73202,81269,
chr10	101491658	101515874	TCONS_00004040	0	+	101491658	101515874	255,0,0	9	508,72,60,210,36,134,28,106,493,	0,4344,7808,11251,12135,15355,18467,22627,23723,
chr10	102106771	102124585	TCONS_00004041	0	+	102106771	102124585	255,0,0	6	517,283,131,206,233,4095,	0,1049,5351,7412,9517,13719,
chr10	102112025	102124585	TCONS_00004042	0	+	102112025	102124585	255,0,0	4	228,206,233,4095,	0,2158,4263,8465,
chr10	102295708	102314287	TCONS_00004043	0	+	102295708	102314287	255,0,0	8	184,251,149,146,107,64,111,6438,	0,459,4682,8999,9991,10566,11188,12141,
chr10	102756832	102767594	TCONS_00004045	0	+	102756832	102767594	255,0,0	5	159,450,660,258,1353,	0,5421,6431,8382,9409,
chr10	102759614	102767594	TCONS_00004046	0	+	102759614	102767594	255,0,0	5	95,450,660,258,1353,	0,2639,3649,5600,6627,
chr10	102791003	102801112	TCONS_00004050	0	+	102791003	102801112	255,0,0	12	288,169,164,171,99,76,86,128,50,50,48,1867,	0,1067,3445,4250,4756,5239,5476,5829,6135,7396,7928,8242,
chr10	102791435	102801112	TCONS_00004051	0	+	102791435	102801112	255,0,0	12	36,169,164,171,99,76,86,128,50,50,48,1867,	0,635,3013,3818,4324,4807,5044,5397,5703,6964,7496,7810,
chr10	102791656	102801112	TCONS_00004052	0	+	102791656	102801112	255,0,0	10	583,164,171,99,76,86,128,1311,48,1867,	0,2792,3597,4103,4586,4823,5176,5482,7275,7589,
chr10	103911900	103923627	TCONS_00004058	0	+	103911900	103923627	255,0,0	13	387,56,143,125,166,116,136,129,111,642,107,93,1760,	0,4875,5042,5287,5905,7049,7289,7752,8089,8308,9412,9689,9967,
chr10	103912070	103923627	TCONS_00004059	0	+	103912070	103923627	255,0,0	13	217,56,140,125,166,146,136,129,111,642,107,93,1760,	0,4705,4875,5117,5735,6879,7119,7582,7919,8138,9242,9519,9797,
chr10	104005200	104142651	TCONS_00004060	0	+	104005200	104142651	255,0,0	40	338,106,67,132,119,109,61,55,148,224,166,212,99,195,190,141,89,203,124,126,83,237,94,177,65,124,72,95,154,226,161,241,194,151,131,102,114,181,129,839,	0,13485,14606,98607,105812,106399,107014,108156,112595,113062,113826,114740,115578,116274,117031,117812,118266,119953,120939,121641,122034,122774,123295,123767,124267,124417,124730,124940,125263,129915,130828,131116,131491,133840,134077,134409,134805,135062,135683,136612,
chr10	104005265	104142651	TCONS_00004061	0	+	104005265	104142651	255,0,0	40	273,106,67,132,119,109,61,55,148,224,166,212,99,195,190,141,89,203,124,126,83,237,94,177,65,124,72,95,154,226,161,241,206,151,131,102,114,181,129,839,	0,13420,14541,98542,105747,106334,106949,108091,112530,112997,113761,114675,115513,116209,116966,117747,118201,119888,120874,121576,121969,122709,123230,123702,124202,124352,124665,124875,125198,129850,130763,131051,131426,133775,134012,134344,134740,134997,135618,136547,
chr10	104154201	104163184	TCONS_00004064	0	+	104154201	104163184	255,0,0	24	156,65,93,82,41,99,152,107,159,105,86,139,126,210,142,115,214,170,103,152,70,173,112,1176,	0,1287,1443,1808,2004,2280,2459,2857,3082,3536,3767,3940,4294,4843,5132,5635,5833,6210,6502,6735,7004,7300,7603,7807,
chr10	104154269	104163184	TCONS_00004066	0	+	104154269	104163184	255,0,0	23	88,93,82,41,99,152,107,159,105,86,139,126,210,142,115,214,170,103,152,70,173,112,1173,	0,1375,1740,1936,2212,2391,2789,3014,3468,3699,3872,4226,4775,5064,5567,5765,6142,6434,6667,6936,7232,7535,7742,
chr10	104155453	104163184	TCONS_00004071	0	+	104155453	104163184	255,0,0	22	284,82,41,99,152,107,159,105,86,139,126,170,142,115,214,170,103,152,70,173,112,1176,	0,556,752,1028,1207,1605,1830,2284,2515,2688,3042,3631,3880,4383,4581,4958,5250,5483,5752,6048,6351,6555,
chr10	104181798	104182894	TCONS_00004075	0	+	104181798	104182894	255,0,0	2	251,334,	0,762,
chr10	104263084	104393290	TCONS_00004076	0	+	104263084	104393290	255,0,0	13	33,211,135,137,143,86,73,154,112,135,139,69,3468,	0,796,5841,46642,89254,90308,90665,93812,96105,111940,113962,123847,126738,
chr10	104263739	104393290	TCONS_00004077	0	+	104263739	104393290	255,0,0	12	352,135,137,143,86,73,154,112,135,139,69,3468,	0,5186,45987,88599,89653,90010,93157,95450,111285,113307,123192,126083,
chr10	104338731	104393290	TCONS_00004078	0	+	104338731	104393290	255,0,0	10	127,143,86,73,157,112,135,139,69,3468,	0,13607,14661,15018,18162,20458,36293,38315,48200,51091,
chr10	104403203	104418114	TCONS_00004080	0	+	104403203	104418114	255,0,0	6	1741,96,234,32,116,1611,	0,11206,11633,12659,12823,13300,
chr10	104503525	104576017	TCONS_00004081	0	+	104503525	104576017	255,0,0	4	375,103,162,3666,	0,54224,66124,68826,
chr10	104557748	104576017	TCONS_00004083	0	+	104557748	104576017	255,0,0	3	104,162,3666,	0,11901,14603,
chr10	105156394	105206321	TCONS_00004085	0	+	105156394	105206321	255,0,0	36	93,113,132,168,162,124,182,108,207,125,61,147,252,141,195,171,220,150,116,542,63,106,90,103,178,57,123,123,292,117,150,248,169,154,166,1187,	0,1778,3759,6480,8384,9347,9971,13061,16478,17328,17632,18367,19853,21154,21802,22900,24710,26350,26905,28346,30691,35491,37310,37610,38160,41377,42048,43108,43652,44096,45188,45575,46527,47277,47879,48740,
chr10	105726955	105788957	TCONS_00004086	0	+	105726955	105788957	255,0,0	18	698,165,49,150,73,195,82,129,1356,131,124,180,130,125,189,126,114,3626,	0,23477,25400,25786,31701,31921,32669,34246,34974,38363,38714,40979,50962,51586,52536,53290,54422,58376,
chr10	106014615	106029868	TCONS_00004089	0	+	106014615	106029868	255,0,0	6	105,109,223,99,107,2859,	0,305,4718,8121,11226,12394,
chr10	111767714	111895424	TCONS_00004091	0	+	111767714	111895424	255,0,0	15	343,224,139,152,81,150,144,99,183,258,120,87,124,96,2341,	0,92668,104820,108302,109385,110630,111254,111509,114153,116060,117869,118460,122406,124348,125369,
chr10	111767766	111895424	TCONS_00004092	0	+	111767766	111895424	255,0,0	14	291,224,139,152,81,150,144,99,183,258,120,87,124,2341,	0,92616,104768,108250,109333,110578,111202,111457,114101,116008,117817,118408,122354,125317,
chr10	112261857	112271299	TCONS_00004097	0	+	112261857	112271299	255,0,0	4	258,149,220,1522,	0,621,4835,7920,
chr10	112327463	112364692	TCONS_00004098	0	+	112327463	112364692	255,0,0	29	126,76,39,68,72,80,79,118,176,81,165,122,214,104,100,161,142,151,153,152,159,108,109,248,213,192,178,107,704,	0,1232,6001,7630,9715,10129,10922,13198,14217,14856,15678,16135,16477,21899,22186,22706,23285,25367,28692,30433,31948,32733,33316,33931,34260,34768,35119,35478,36525,
chr10	112328694	112364692	TCONS_00004099	0	+	112328694	112364692	255,0,0	28	77,39,68,72,80,79,118,176,81,165,122,214,104,100,161,142,151,153,152,159,108,109,248,213,192,178,107,704,	0,4770,6399,8484,8898,9691,11967,12986,13625,14447,14904,15246,20668,20955,21475,22054,24136,27461,29202,30717,31502,32085,32700,33029,33537,33888,34247,35294,
chr10	112631328	112660268	TCONS_00004100	0	+	112631328	112660268	255,0,0	13	25,210,105,303,95,114,222,98,115,108,111,140,2483,	0,238,4395,9662,11432,13682,16094,17962,18985,22520,22841,24377,26457,
chr10	112679335	112773633	TCONS_00004102	0	+	112679335	112773633	255,0,0	10	80,185,937,138,131,189,123,138,118,2266,	0,32030,44547,66050,80837,85028,87953,89670,90135,92032,
chr10	112679336	112773633	TCONS_00004103	0	+	112679336	112773633	255,0,0	8	79,138,131,189,123,138,118,2266,	0,66049,80836,85027,87952,89669,90134,92031,
chr10	114134864	114188133	TCONS_00004104	0	+	114134864	114188133	255,0,0	21	436,185,109,65,102,100,179,33,52,74,78,135,135,96,73,89,117,144,102,72,1158,	0,19811,23794,29404,29598,33315,34400,35356,35477,36349,36795,38066,41781,42739,46486,46840,47218,50231,51151,51681,52111,
chr10	114135864	114188133	TCONS_00004105	0	+	114135864	114188133	255,0,0	21	342,185,109,65,102,100,179,33,52,74,78,135,135,96,73,89,117,144,102,72,1158,	0,18811,22794,28404,28598,32315,33400,34356,34477,35349,35795,37066,40781,41739,45486,45840,46218,49231,50151,50681,51111,
chr10	115438941	115490765	TCONS_00004107	0	+	115438941	115490765	255,0,0	7	167,110,137,129,176,130,1696,	0,18311,41849,42468,46179,47122,50128,
chr10	115439422	115490765	TCONS_00004108	0	+	115439422	115490765	255,0,0	7	315,110,137,129,176,130,1696,	0,17830,41368,41987,45698,46641,49647,
chr10	116581528	116624580	TCONS_00004110	0	+	116581528	116624580	255,0,0	17	354,79,170,105,123,294,197,115,77,193,170,144,91,144,141,104,3387,	0,9082,11463,13767,14354,21163,21971,23597,24243,24405,24789,25320,26877,33427,38979,39461,39665,
chr10	119014640	119045033	TCONS_00004112	0	+	119014640	119045033	255,0,0	10	237,44,61,96,79,52,64,120,134,8361,	0,349,467,2667,11603,11854,12543,14941,15200,22032,
chr10	120863604	120897648	TCONS_00004113	0	+	120863604	120897648	255,0,0	9	105,197,80,149,112,101,108,95,1666,	0,3875,7756,13426,16248,19376,25422,28422,32378,
chr10	120863610	120897648	TCONS_00004114	0	+	120863610	120897648	255,0,0	9	99,217,80,149,112,101,108,95,1666,	0,3849,7750,13420,16242,19370,25416,28416,32372,
chr10	120967240	121215251	TCONS_00004116	0	+	120967240	121215251	255,0,0	16	241,96,113,78,101,93,64,141,191,38,90,209,138,138,132,771,	0,118787,173086,188966,215437,217264,222646,223658,228922,232002,234270,235815,240394,244942,245416,247240,
chr10	121410901	121437448	TCONS_00004117	0	+	121410901	121437448	255,0,0	5	165,221,327,402,1473,	0,245,18461,20865,25074,
chr10	121410911	121437448	TCONS_00004118	0	+	121410911	121437448	255,0,0	4	456,327,402,1473,	0,18451,20855,25064,
chr10	121652156	121704165	TCONS_00004119	0	+	121652156	121704165	255,0,0	21	301,533,211,194,90,121,90,142,209,119,153,96,192,156,103,186,163,102,207,1781,183,	0,5782,10154,11439,16396,19399,22085,23103,25191,25748,26799,28244,33391,36962,37684,39488,40360,41041,47941,48467,51826,
chr10	121652157	121704165	TCONS_00004120	0	+	121652157	121704165	255,0,0	19	300,533,211,194,90,121,90,142,209,119,153,96,192,156,103,186,163,102,4068,	0,5781,10153,11438,16395,19398,22084,23102,25190,25747,26798,28243,33390,36961,37683,39487,40359,41040,47940,
chr10	121652231	121704165	TCONS_00004121	0	+	121652231	121704165	255,0,0	19	226,716,211,194,90,121,90,142,209,119,153,96,192,156,103,186,163,102,4068,	0,5524,10079,11364,16321,19324,22010,23028,25116,25673,26724,28169,33316,36887,37609,39413,40285,40966,47866,
chr10	121679623	121704165	TCONS_00004123	0	+	121679623	121704165	255,0,0	9	205,96,192,156,103,186,163,102,4068,	0,777,5924,9495,10217,12021,12893,13574,20474,
chr10	122610523	122669038	TCONS_00004124	0	+	122610523	122669038	255,0,0	29	495,112,154,174,187,166,115,196,104,177,85,107,76,109,125,148,107,115,172,109,63,66,178,96,166,98,146,80,971,	0,1512,7631,9097,11723,14035,14618,15557,16054,20158,22827,27341,29814,32768,34802,35677,38066,38883,39704,49017,50024,51245,52043,53035,53634,54307,54864,55764,57544,
chr10	122610779	122669038	TCONS_00004125	0	+	122610779	122669038	255,0,0	29	284,112,154,174,187,166,115,196,104,177,85,107,76,109,125,148,107,115,172,109,63,66,178,96,166,98,146,80,971,	0,1256,7375,8841,11467,13779,14362,15301,15798,19902,22571,27085,29558,32512,34546,35421,37810,38627,39448,48761,49768,50989,51787,52779,53378,54051,54608,55508,57288,
chr10	122625139	122669038	TCONS_00004129	0	+	122625139	122669038	255,0,0	23	117,196,104,177,85,107,76,109,125,148,107,115,172,109,63,66,178,96,166,98,146,80,971,	0,941,1438,5542,8211,12725,15198,18152,20186,21061,23450,24267,25088,34401,35408,36629,37427,38419,39018,39691,40248,41148,42928,
chr10	124134245	124192049	TCONS_00004130	0	+	124134245	124192049	255,0,0	14	77,70,161,57,46,98,126,144,69,65,64,90,41,2910,	0,17573,18451,23188,25613,31846,38190,41129,43170,49469,50166,52212,53546,54894,
chr10	124134253	124192049	TCONS_00004131	0	+	124134253	124192049	255,0,0	13	69,70,161,57,46,98,126,144,69,65,64,90,2910,	0,17565,18443,23180,25605,31838,38182,41121,43162,49461,50158,52204,54886,
chr10	124151817	124192049	TCONS_00004135	0	+	124151817	124192049	255,0,0	12	71,161,57,46,98,126,144,69,65,64,90,2910,	0,879,5616,8041,14274,20618,23557,25598,31897,32594,34640,37322,
chr10	124913897	124925246	TCONS_00004137	0	+	124913897	124925246	255,0,0	8	104,195,70,152,159,178,217,1911,	0,536,1276,3347,6025,7854,8230,9438,
chr10	124913897	124925246	TCONS_00004138	0	+	124913897	124925246	255,0,0	8	104,195,70,152,159,178,217,684,	0,536,1276,3347,6025,7854,8230,10665,
chr10	126490365	126525639	TCONS_00004140	0	+	126490365	126525639	255,0,0	9	105,91,37,67,191,120,85,115,2569,	0,5034,14779,17587,24798,26959,27596,29552,32705,
chr10	127511944	127525418	TCONS_00004143	0	+	127511944	127525418	255,0,0	7	347,75,81,90,188,175,746,	0,3215,4182,7186,8044,10396,12728,
chr10	127512121	127542770	TCONS_00004144	0	+	127512121	127542770	255,0,0	8	170,75,81,90,188,175,76,1077,	0,3038,4005,7009,7867,10219,17702,29572,
chr10	128593966	129250886	TCONS_00004145	0	+	128593966	129250886	255,0,0	52	166,84,41,56,97,149,136,158,82,136,73,143,126,125,99,73,104,184,98,90,101,135,109,71,107,128,96,102,95,79,101,59,149,86,157,41,91,120,90,105,142,79,85,87,177,84,138,146,199,154,152,1291,	0,174999,182245,186215,191818,194752,201045,202389,203651,204469,213029,216529,223007,227497,228982,230649,235947,236434,242016,246922,247361,256978,265965,310528,314545,329771,331966,452305,461632,543303,547943,558966,566361,578078,578355,584379,585575,589087,607352,608622,613334,613610,615137,619449,622662,623963,630171,637580,643324,648423,651691,655629,
chr10	128593966	129250886	TCONS_00004146	0	+	128593966	129250886	255,0,0	52	166,84,41,56,97,149,136,158,82,136,73,80,126,125,99,73,104,184,98,90,101,135,109,71,107,128,96,102,95,79,101,59,149,86,157,41,91,120,90,105,142,79,85,87,177,84,138,146,199,154,152,1291,	0,174999,182245,186215,191818,194752,201045,202389,203651,204469,213029,216592,223007,227497,228982,230649,235947,236434,242016,246922,247361,256978,265965,310528,314545,329771,331966,452305,461632,543303,547943,558966,566361,578078,578355,584379,585575,589087,607352,608622,613334,613610,615137,619449,622662,623963,630171,637580,643324,648423,651691,655629,
chr10	128797616	129250886	TCONS_00004147	0	+	128797616	129250886	255,0,0	44	83,136,73,143,126,125,99,73,104,184,98,90,101,135,109,71,107,128,96,102,95,79,101,59,149,86,157,41,91,120,90,105,142,79,85,87,177,84,138,146,199,154,152,1291,	0,819,9379,12879,19357,23847,25332,26999,32297,32784,38366,43272,43711,53328,62315,106878,110895,126121,128316,248655,257982,339653,344293,355316,362711,374428,374705,380729,381925,385437,403702,404972,409684,409960,411487,415799,419012,420313,426521,433930,439674,444773,448041,451979,
chr10	129839223	129884171	TCONS_00004152	0	+	129839223	129884171	255,0,0	18	31,448,137,91,77,37,98,120,164,136,150,94,77,135,126,167,136,3076,	0,6430,8570,15163,19979,20719,22123,25115,27163,28732,29341,29848,31178,32377,35643,36657,38600,41872,
chr10	129845116	129884171	TCONS_00004153	0	+	129845116	129884171	255,0,0	19	50,294,74,137,91,77,37,98,120,164,136,150,94,77,135,126,167,136,3076,	0,537,911,2677,9270,14086,14826,16230,19222,21270,22839,23448,23955,25285,26484,29750,30764,32707,35979,
chr10	129845772	129884171	TCONS_00004156	0	+	129845772	129884171	255,0,0	19	175,74,137,91,77,37,98,120,164,136,150,94,77,135,126,167,136,109,835,	0,255,2021,8614,13430,14170,15574,18566,20614,22183,22792,23299,24629,25828,29094,30108,32051,35323,37564,
chr10	129863219	129884171	TCONS_00004158	0	+	129863219	129884171	255,0,0	12	37,120,164,136,150,94,77,135,126,167,136,3076,	0,1119,3167,4736,5345,5852,7182,8381,11647,12661,14604,17876,
chr10	131934642	131982693	TCONS_00004160	0	+	131934642	131982693	255,0,0	13	134,109,75,202,173,62,58,53,40,93,79,209,562,	0,8832,23616,24417,30128,30540,33054,35205,38488,38618,42963,43734,47489,
chr10	133747960	133771194	TCONS_00004162	0	+	133747960	133771194	255,0,0	7	99,166,113,178,165,262,2007,	0,5574,6125,9511,10838,13073,21227,
chr10	135122876	135126745	TCONS_00004165	0	+	135122876	135126745	255,0,0	5	91,202,125,126,454,	0,403,791,2343,3415,
chr10	135192740	135205641	TCONS_00004166	0	+	135192740	135205641	255,0,0	7	261,487,200,253,113,158,826,	0,762,2223,4723,9719,10353,12075,
chr10	135193407	135205641	TCONS_00004167	0	+	135193407	135205641	255,0,0	6	582,200,253,113,158,826,	0,1556,4056,9052,9686,11408,
chr10	135207661	135236007	TCONS_00004168	0	+	135207661	135236007	255,0,0	11	175,65,105,81,57,91,62,97,82,113,2478,	0,1555,2005,4277,5012,5371,7371,7991,8534,25322,25868,
chr10	855152	891885	TCONS_00004169	0	-	855152	891885	255,0,0	14	4001,109,125,165,46,252,107,210,54,111,104,137,79,799,	0,5529,5733,8512,11587,15852,16551,20172,20468,21654,27190,33719,35764,35934,
chr10	855152	949426	TCONS_00004173	0	-	855152	949426	255,0,0	18	4001,109,125,165,46,252,107,210,54,111,104,137,79,141,148,60,120,57,	0,5529,5733,8512,11587,15852,16551,20172,20468,21654,27190,33719,35764,54530,54910,75234,76428,94217,
chr10	855152	977433	TCONS_00004176	0	-	855152	977433	255,0,0	19	4001,109,125,165,46,252,107,210,54,111,104,137,79,141,148,71,60,120,66,	0,5529,5733,8512,11587,15852,16551,20172,20468,21654,27190,33719,35764,54530,54910,60800,75234,76428,122215,
chr10	855152	977768	TCONS_00004178	0	-	855152	977768	255,0,0	18	4001,109,125,165,46,252,107,210,54,111,104,137,79,141,148,60,120,50,	0,5529,5733,8512,11587,15852,16551,20172,20468,21654,27190,33719,35764,54530,54910,75234,76428,122566,
chr10	1085968	1095271	TCONS_00004179	0	-	1085968	1095271	255,0,0	4	1476,131,93,468,	0,2603,3272,8835,
chr10	1085968	1095536	TCONS_00004180	0	-	1085968	1095536	255,0,0	5	1476,131,93,173,733,	0,2603,3272,3970,8835,
chr10	3179215	3214948	TCONS_00004182	0	-	3179215	3214948	255,0,0	28	53,603,103,146,126,113,75,121,101,166,77,121,133,117,139,135,97,114,129,89,127,161,97,115,152,107,103,40,	0,498,1211,1880,3663,6365,7268,8572,10126,10548,10963,11147,12597,14223,18567,19906,20411,21016,21890,22824,23180,26701,28214,28389,29205,29912,33080,35693,
chr10	3179519	3214950	TCONS_00004186	0	-	3179519	3214950	255,0,0	27	797,103,146,126,113,75,121,101,166,77,121,133,117,139,135,97,114,129,89,127,161,97,115,152,107,103,42,	0,907,1576,3359,6061,6964,8268,9822,10244,10659,10843,12293,13919,18263,19602,20107,20712,21586,22520,22876,26397,27910,28085,28901,29608,32776,35389,
chr10	3817732	3827454	TCONS_00004187	0	-	3817732	3827454	255,0,0	4	4050,124,574,350,	0,4565,6100,9372,
chr10	3817732	3827486	TCONS_00004189	0	-	3817732	3827486	255,0,0	5	4050,124,574,66,382,	0,4565,6100,7675,9372,
chr10	3965749	3975253	TCONS_00004190	0	-	3965749	3975253	255,0,0	6	2114,38,94,108,102,2044,	0,3077,3529,3820,5143,7460,
chr10	3965749	3975253	TCONS_00004191	0	-	3965749	3975253	255,0,0	5	1091,396,399,102,2044,	0,1718,3529,5143,7460,
chr10	3968200	3975258	TCONS_00004197	0	-	3968200	3975258	255,0,0	5	729,94,108,102,2049,	0,1078,1369,2692,5009,
chr10	3968200	3975263	TCONS_00004198	0	-	3968200	3975263	255,0,0	5	664,94,108,102,2054,	0,1078,1369,2692,5009,
chr10	3968980	3975400	TCONS_00004199	0	-	3968980	3975400	255,0,0	3	392,97,2191,	0,1917,4229,
chr10	5804488	5855393	TCONS_00004202	0	-	5804488	5855393	255,0,0	11	3627,55,145,172,100,132,199,135,100,108,217,	0,3715,3968,5687,11316,22616,23326,32359,34237,38072,50688,
chr10	5990898	6011122	TCONS_00004204	0	-	5990898	6011122	255,0,0	8	4271,76,33,201,99,195,110,384,	0,7443,10818,11431,14807,17209,19658,19840,
chr10	5990898	6019983	TCONS_00004209	0	-	5990898	6019983	255,0,0	6	4271,76,33,201,195,244,	0,7443,10818,11431,17209,28841,
chr10	5990898	6019998	TCONS_00004210	0	-	5990898	6019998	255,0,0	8	4391,76,33,201,99,195,153,631,	0,7443,10818,11431,14807,17209,19840,28469,
chr10	5990898	6021668	TCONS_00004223	0	-	5990898	6021668	255,0,0	8	4271,76,33,201,99,195,82,1437,	0,7443,10818,11431,14807,17209,28841,29333,
chr10	6052693	6104549	TCONS_00004241	0	-	6052693	6104549	255,0,0	8	2166,67,72,72,216,111,192,499,	0,7322,8697,9139,10747,13513,15103,51357,
chr10	6469040	6557163	TCONS_00004243	0	-	6469040	6557163	255,0,0	17	1284,129,189,139,63,92,174,161,118,110,130,86,32,163,61,200,184,	0,3731,14814,29595,35224,37234,51913,56361,58073,58956,64604,69956,70141,71317,80357,83916,87939,
chr10	6469040	6622235	TCONS_00004244	0	-	6469040	6622235	255,0,0	18	1284,129,189,139,63,92,174,161,118,110,130,86,32,163,61,200,127,63,	0,3731,14814,29595,35224,37234,51913,56361,58073,58956,64604,69956,70141,71317,80357,83916,87939,153132,
chr10	7200383	7452906	TCONS_00004245	0	-	7200383	7452906	255,0,0	21	5489,129,264,167,176,110,140,71,43,114,127,83,148,102,98,247,89,241,95,151,84,	0,12506,13473,14073,17568,30202,39126,41992,44058,47393,61989,69433,85136,90126,118470,125482,127444,209227,211859,223377,252439,
chr10	11501589	11653557	TCONS_00004247	0	-	11501589	11653557	255,0,0	15	4259,153,100,66,95,121,49,110,108,81,40,83,68,87,116,	0,22179,25380,25578,26226,29511,31241,33528,41510,50004,58944,65795,67909,138040,151852,
chr10	11501589	11653602	TCONS_00004248	0	-	11501589	11653602	255,0,0	15	4259,153,100,66,95,121,49,110,108,82,39,83,68,87,161,	0,22179,25380,25578,26226,29511,31241,33528,41510,50004,58945,65795,67909,138040,151852,
chr10	11961914	12084830	TCONS_00004249	0	-	11961914	12084830	255,0,0	22	1392,121,142,168,99,105,140,184,276,204,186,117,114,109,86,104,150,198,161,780,383,77,	0,9949,11725,16629,22749,23148,28453,32150,35316,36404,39255,44093,47425,59141,77756,79990,81760,84614,94108,108829,115143,122839,
chr10	12205539	12238185	TCONS_00004250	0	-	12205539	12238185	255,0,0	11	3203,268,54,9,102,96,108,50,68,104,417,	0,4003,7176,7359,9224,10177,14252,15542,21348,22688,32229,
chr10	12205539	12238316	TCONS_00004251	0	-	12205539	12238316	255,0,0	10	4271,54,13,98,96,108,50,68,104,548,	0,7176,7359,9228,10177,14252,15542,21348,22688,32229,
chr10	12205539	12238319	TCONS_00004252	0	-	12205539	12238319	255,0,0	10	4271,54,9,102,96,108,50,68,104,551,	0,7176,7359,9224,10177,14252,15542,21348,22688,32229,
chr10	13319563	13342087	TCONS_00004253	0	-	13319563	13342087	255,0,0	9	791,135,150,182,82,169,111,59,120,	0,3412,6126,10796,14267,16864,17932,20623,22404,
chr10	13359200	13389418	TCONS_00004255	0	-	13359200	13389418	255,0,0	9	2156,213,100,91,155,108,104,271,142,	0,5634,11150,12497,16616,19042,21504,27557,30076,
chr10	13359200	13390140	TCONS_00004256	0	-	13359200	13390140	255,0,0	9	2156,213,100,91,155,108,104,271,141,	0,5634,11150,12497,16616,19042,21504,27557,30799,
chr10	13684783	13749578	TCONS_00004257	0	-	13684783	13749578	255,0,0	13	4252,97,887,168,238,57,229,123,134,36,142,139,542,	0,11632,13852,16539,17532,20669,23313,27622,32127,50698,51114,58556,64253,
chr10	13684783	13933759	TCONS_00004259	0	-	13684783	13933759	255,0,0	24	4252,97,887,168,238,57,229,123,134,36,142,139,77,87,58,66,84,23,57,85,93,95,66,136,	0,11632,13852,16539,17532,20669,23313,27622,32127,50698,51114,58556,64253,95060,97410,97728,104952,118863,119840,140138,153712,168030,216063,248840,
chr10	13684783	13933762	TCONS_00004260	0	-	13684783	13933762	255,0,0	23	4252,97,887,168,238,57,229,123,134,142,139,77,87,58,66,84,23,57,85,93,95,66,139,	0,11632,13852,16539,17532,20669,23313,27622,32127,51114,58556,64253,95060,97410,97728,104952,118863,119840,140138,153712,168030,216063,248840,
chr10	13684783	14050149	TCONS_00004263	0	-	13684783	14050149	255,0,0	23	4252,97,887,168,238,57,229,123,134,142,139,77,87,58,66,84,23,57,85,93,95,66,91,	0,11632,13852,16539,17532,20669,23313,27622,32127,51114,58556,64253,95060,97410,97728,104952,118863,119840,140138,153712,168030,216063,365275,
chr10	13684783	14066564	TCONS_00004264	0	-	13684783	14066564	255,0,0	23	4252,97,887,168,238,57,229,123,134,142,139,77,87,58,66,84,23,57,85,93,95,66,212,	0,11632,13852,16539,17532,20669,23313,27622,32127,51114,58556,64253,95060,97410,97728,104952,118863,119840,140138,153712,168030,216063,381569,
chr10	14560347	14646303	TCONS_00004278	0	-	14560347	14646303	255,0,0	4	2958,151,184,65,	0,3520,11983,85891,
chr10	14560347	14646322	TCONS_00004279	0	-	14560347	14646322	255,0,0	5	2958,151,184,66,84,	0,3520,11983,34973,85891,
chr10	16632500	16859478	TCONS_00004287	0	-	16632500	16859478	255,0,0	9	2995,133,115,83,119,121,51,112,165,	0,104521,162037,162416,164369,173888,191532,226471,226813,
chr10	16794463	16859478	TCONS_00004289	0	-	16794463	16859478	255,0,0	6	189,83,119,121,51,165,	0,453,2406,11925,29569,64850,
chr10	16794463	16859497	TCONS_00004290	0	-	16794463	16859497	255,0,0	6	189,83,119,121,51,526,	0,453,2406,11925,29569,64508,
chr10	21955620	21975252	TCONS_00004295	0	-	21955620	21975252	255,0,0	3	100,75,181,	0,6916,19451,
chr10	22045467	22292812	TCONS_00004296	0	-	22045467	22292812	255,0,0	12	217,449,49,120,158,91,94,98,166,47,102,671,	0,2631,9722,49441,125743,147983,162240,163293,164259,171967,172501,246674,
chr10	22823788	23003511	TCONS_00004297	0	-	22823788	23003511	255,0,0	10	2422,104,244,114,39,147,153,97,98,400,	0,5111,6944,15799,32991,38451,56769,73067,74760,179323,
chr10	24872381	24880287	TCONS_00004298	0	-	24872381	24880287	255,0,0	3	2654,32,134,	0,5818,7772,
chr10	24872381	25012528	TCONS_00004299	0	-	24872381	25012528	255,0,0	25	2654,32,106,42,126,90,74,79,156,143,137,65,285,126,37,103,159,1897,55,79,93,25,180,443,38,	0,5818,7772,8189,8434,11497,11664,12264,12435,13287,13994,14492,17193,18525,20859,24046,24292,36020,46543,49949,51558,83532,86765,138384,140109,
chr10	24872381	25012542	TCONS_00004300	0	-	24872381	25012542	255,0,0	24	2654,32,42,126,90,74,79,156,143,137,65,285,126,37,103,159,1897,55,79,93,25,180,443,52,	0,5818,8189,8434,11497,11664,12264,12435,13287,13994,14492,17193,18525,20859,24046,24292,36020,46543,49949,51558,83532,86765,138384,140109,
chr10	26950502	26982101	TCONS_00004301	0	-	26950502	26982101	255,0,0	5	2819,88,50,70,135,	0,6833,14542,22294,31464,
chr10	27034217	27149904	TCONS_00004302	0	-	27034217	27149904	255,0,0	10	3457,186,174,101,141,101,15,177,168,229,	0,6309,13773,19929,23563,24956,25786,31776,77849,115458,
chr10	27034217	27149934	TCONS_00004303	0	-	27034217	27149934	255,0,0	10	3457,186,87,174,101,141,101,177,168,259,	0,6309,10366,13773,19929,23563,24956,31776,77849,115458,
chr10	27034217	27149941	TCONS_00004304	0	-	27034217	27149941	255,0,0	10	3457,186,177,101,141,101,15,177,168,266,	0,6309,13773,19929,23563,24956,25786,31776,77849,115458,
chr10	27034217	27149950	TCONS_00004305	0	-	27034217	27149950	255,0,0	8	3457,186,101,141,101,177,168,275,	0,6309,19929,23563,24956,31776,77849,115458,
chr10	27034217	27149993	TCONS_00004309	0	-	27034217	27149993	255,0,0	9	3457,186,101,141,101,15,177,168,318,	0,6309,19929,23563,24956,25786,31776,77849,115458,
chr10	27398437	27444584	TCONS_00004312	0	-	27398437	27444584	255,0,0	20	2612,87,74,127,152,156,113,63,133,153,91,83,84,151,110,99,163,135,193,582,	0,5012,6551,6710,8067,9785,10926,11877,13332,14038,17187,22350,24530,25322,26767,32878,35919,39397,44669,45565,
chr10	27484142	27529744	TCONS_00004315	0	-	27484142	27529744	255,0,0	14	2229,110,51,200,268,107,204,135,33,115,73,121,166,142,	0,9226,9984,13032,15600,20321,22766,24509,27993,28124,36534,39878,45105,45460,
chr10	27484142	27530320	TCONS_00004319	0	-	27484142	27530320	255,0,0	13	2229,110,51,200,268,107,204,135,115,73,121,156,26,	0,9226,9984,13032,15600,20321,22766,24509,28124,36534,39878,45105,46152,
chr10	27484142	27530322	TCONS_00004320	0	-	27484142	27530322	255,0,0	13	2229,110,51,200,268,107,204,135,115,73,121,166,28,	0,9226,9984,13032,15600,20321,22766,24509,28124,36534,39878,45105,46152,
chr10	27484142	27531017	TCONS_00004321	0	-	27484142	27531017	255,0,0	13	2229,110,51,200,268,107,204,135,115,73,121,156,30,	0,9226,9984,13032,15600,20321,22766,24509,28124,36534,39878,45105,46845,
chr10	28811496	28815114	TCONS_00004325	0	-	28811496	28815114	255,0,0	2	2044,238,	0,3380,
chr10	28811496	28820845	TCONS_00004326	0	-	28811496	28820845	255,0,0	3	2044,61,182,	0,3380,9167,
chr10	28811496	28822545	TCONS_00004327	0	-	28811496	28822545	255,0,0	2	3441,1175,	0,9874,
chr10	29746102	29844119	TCONS_00004331	0	-	29746102	29844119	255,0,0	31	1160,156,125,144,156,134,208,106,152,277,145,176,146,148,137,156,173,178,87,90,148,127,226,577,244,140,62,35,667,152,140,	0,1260,5103,6318,8421,10568,13102,13964,16664,23363,24410,27482,28911,29236,29989,31427,33673,36040,37740,37918,41942,55561,65236,66277,67298,72531,73433,74080,93423,97609,97877,
chr10	29746102	30023976	TCONS_00004338	0	-	29746102	30023976	255,0,0	36	1160,156,125,144,156,134,208,106,152,277,145,176,146,148,137,156,173,178,87,90,148,127,226,577,244,140,62,35,667,152,58,92,58,100,99,35,	0,1260,5103,6318,8421,10568,13102,13964,16664,23363,24410,27482,28911,29236,29989,31427,33673,36040,37740,37918,41942,55561,65236,66277,67298,72531,73433,74080,93423,97609,97877,106027,112081,200795,229379,277839,
chr10	29746102	30025937	TCONS_00004341	0	-	29746102	30025937	255,0,0	36	1160,156,125,144,156,134,208,106,152,277,145,176,146,148,137,156,173,178,87,90,148,127,226,577,244,140,62,35,667,152,58,92,58,100,99,324,	0,1260,5103,6318,8421,10568,13102,13964,16664,23363,24410,27482,28911,29236,29989,31427,33673,36040,37740,37918,41942,55561,65236,66277,67298,72531,73433,74080,93423,97609,97877,106027,112081,200795,229379,279511,
chr10	31133036	31288432	TCONS_00004343	0	-	31133036	31288432	255,0,0	7	1466,1837,68,83,77,58,166,	0,4423,32890,64825,97467,140261,155230,
chr10	31133036	31288448	TCONS_00004344	0	-	31133036	31288448	255,0,0	8	1466,1837,68,83,77,59,58,182,	0,4423,32890,64825,97467,130486,140261,155230,
chr10	31133036	31288503	TCONS_00004345	0	-	31133036	31288503	255,0,0	8	1466,913,146,68,83,77,58,237,	0,4423,6114,32890,64825,97467,140261,155230,
chr10	31216823	31230579	TCONS_00004346	0	-	31216823	31230579	255,0,0	3	2885,106,76,	0,4172,13680,
chr10	31263517	31288451	TCONS_00004347	0	-	31263517	31288451	255,0,0	3	64,58,185,	0,9780,24749,
chr10	32094371	32217761	TCONS_00004348	0	-	32094371	32217761	255,0,0	19	2389,103,135,78,99,117,103,99,102,82,62,75,126,81,141,264,755,39,151,	0,3205,3550,3786,5205,7263,8815,12344,14943,20860,26295,34193,38017,47073,48622,55951,102728,105081,123239,
chr10	32094371	32217773	TCONS_00004350	0	-	32094371	32217773	255,0,0	19	2389,103,135,78,99,117,103,99,102,82,62,15,75,126,81,264,755,39,163,	0,3205,3550,3786,5205,7263,8815,12344,14943,20860,26295,33861,34193,38017,47073,55951,102728,105081,123239,
chr10	32094371	32217787	TCONS_00004351	0	-	32094371	32217787	255,0,0	20	2389,103,135,78,99,117,103,99,102,82,62,15,75,126,81,141,264,755,39,177,	0,3205,3550,3786,5205,7263,8815,12344,14943,20860,26295,33861,34193,38017,47073,48622,55951,102728,105081,123239,
chr10	32297573	32345344	TCONS_00004352	0	-	32297573	32345344	255,0,0	26	2871,151,217,105,72,61,102,110,62,118,189,144,207,69,194,149,146,105,125,88,56,49,105,74,88,569,	0,6863,8497,9406,9670,9856,11212,12376,12580,13494,14202,19782,22427,24060,25199,26044,26876,27244,28608,28874,29517,30132,30681,31738,39818,47202,
chr10	32556389	32636089	TCONS_00004353	0	-	32556389	32636089	255,0,0	14	1674,364,142,119,353,149,90,177,160,149,207,146,160,399,	0,4092,4564,5701,17236,19232,19464,19636,23701,25034,25526,26130,38310,79301,
chr10	32634043	32636088	TCONS_00004354	0	-	32634043	32636088	255,0,0	2	447,398,	0,1647,
chr10	33188203	33247200	TCONS_00004360	0	-	33188203	33247200	255,0,0	16	2360,167,233,223,239,200,141,90,96,156,239,171,223,86,67,128,	0,9092,10947,12172,12610,20609,20969,22981,23364,24309,26595,28818,30546,33239,36216,58869,
chr10	33199149	33247177	TCONS_00004361	0	-	33199149	33247177	255,0,0	15	234,223,239,200,141,90,96,156,239,171,223,86,67,217,105,	0,1226,1664,9663,10023,12035,12418,13363,15649,17872,19600,22293,25270,43371,47923,
chr10	33465172	33623809	TCONS_00004365	0	-	33465172	33623809	255,0,0	17	4121,51,97,272,138,60,84,145,332,145,156,167,156,228,182,175,572,	0,6453,9383,9972,16036,21405,26667,31327,37141,45474,49889,77783,80071,87401,94430,154463,158065,
chr10	33465172	33624034	TCONS_00004366	0	-	33465172	33624034	255,0,0	18	4121,51,97,272,138,60,105,145,332,145,156,167,156,228,182,175,531,117,	0,6453,9383,9972,16036,21405,26646,31327,37141,45474,49889,77783,80071,87401,94430,154463,158065,158745,
chr10	33465172	33625243	TCONS_00004371	0	-	33465172	33625243	255,0,0	18	4121,51,97,272,138,60,105,145,332,145,156,167,156,228,182,175,531,121,	0,6453,9383,9972,16036,21405,26646,31327,37141,45474,49889,77783,80071,87401,94430,154463,158065,159950,
chr10	33482149	33623820	TCONS_00004376	0	-	33482149	33623820	255,0,0	13	1559,60,84,145,332,145,156,167,156,228,182,175,583,	0,4428,9690,14350,20164,28497,32912,60806,63094,70424,77453,137486,141088,
chr10	35297349	35379280	TCONS_00004378	0	-	35297349	35379280	255,0,0	21	2021,117,102,203,67,78,153,87,129,60,108,125,163,111,97,83,106,95,103,141,174,	0,3426,5277,7770,16710,20388,21066,22878,23069,24013,24744,26750,30498,36144,36350,41261,46012,52452,54538,62777,81757,
chr10	35297349	35379527	TCONS_00004379	0	-	35297349	35379527	255,0,0	21	2021,117,102,203,67,78,153,87,129,60,108,125,163,111,97,83,106,95,103,141,170,	0,3426,5277,7770,16710,20388,21066,22878,23069,24013,24744,26750,30498,36144,36350,41261,46012,52452,54538,62777,82008,
chr10	36810655	36813163	TCONS_00004380	0	-	36810655	36813163	255,0,0	2	900,1433,	0,1075,
chr10	38238617	38265531	TCONS_00004384	0	-	38238617	38265531	255,0,0	6	3506,64,96,127,100,98,	0,4005,7330,7730,22018,26816,
chr10	43880685	43903249	TCONS_00004387	0	-	43880685	43903249	255,0,0	4	2699,59,135,85,	0,9392,11218,22479,
chr10	43880685	43904755	TCONS_00004391	0	-	43880685	43904755	255,0,0	4	2699,59,135,177,	0,9392,11218,23893,
chr10	44139325	44141745	TCONS_00004392	0	-	44139325	44141745	255,0,0	2	924,234,	0,2186,
chr10	44139325	44144156	TCONS_00004393	0	-	44139325	44144156	255,0,0	3	924,139,124,	0,2186,4707,
chr10	44139325	44144677	TCONS_00004394	0	-	44139325	44144677	255,0,0	3	924,139,428,	0,2186,4924,
chr10	44865610	44880472	TCONS_00004395	0	-	44865610	44880472	255,0,0	4	3181,87,118,80,	0,8474,10600,14782,
chr10	44872352	44880466	TCONS_00004396	0	-	44872352	44880466	255,0,0	3	1819,118,74,	0,3858,8040,
chr10	45471036	45476350	TCONS_00004397	0	-	45471036	45476350	255,0,0	2	2467,2285,	0,3029,
chr10	45949955	46048735	TCONS_00004398	0	-	45949955	46048735	255,0,0	7	4036,148,181,89,51,180,176,	0,4612,6723,9731,34859,78602,98604,
chr10	45949955	46090317	TCONS_00004399	0	-	45949955	46090317	255,0,0	7	4036,148,181,89,51,180,635,	0,4612,6723,9731,34859,78602,139727,
chr10	45949955	46090372	TCONS_00004400	0	-	45949955	46090372	255,0,0	8	4036,148,181,89,51,180,93,690,	0,4612,6723,9731,34859,78602,98604,139727,
chr10	49651878	49701681	TCONS_00004403	0	-	49651878	49701681	255,0,0	8	2784,880,122,74,133,208,177,200,	0,6425,9468,10252,11166,15848,35752,49603,
chr10	49651878	49732166	TCONS_00004405	0	-	49651878	49732166	255,0,0	8	2784,880,122,74,133,208,177,69,	0,6425,9468,10252,11166,15848,35752,80219,
chr10	49651878	49860511	TCONS_00004406	0	-	49651878	49860511	255,0,0	10	2784,880,122,74,133,208,177,88,200,233,	0,6425,9468,10252,11166,15848,35752,111629,139119,208400,
chr10	49651878	49860615	TCONS_00004407	0	-	49651878	49860615	255,0,0	10	2784,880,122,74,133,208,129,88,200,337,	0,6425,9468,10252,11166,15848,35800,111629,139119,208400,
chr10	49651878	49863576	TCONS_00004408	0	-	49651878	49863576	255,0,0	11	2784,880,122,74,133,208,177,88,200,163,23,	0,6425,9468,10252,11166,15848,35752,111629,139119,208400,211675,
chr10	50362487	50396466	TCONS_00004410	0	-	50362487	50396466	255,0,0	6	1467,24,31,141,54,128,	0,7156,11323,12426,13466,33851,
chr10	50362487	50396469	TCONS_00004411	0	-	50362487	50396469	255,0,0	5	1467,24,141,54,131,	0,7156,12426,13466,33851,
chr10	50362487	50396495	TCONS_00004412	0	-	50362487	50396495	255,0,0	5	1467,24,1244,54,157,	0,7156,11323,13466,33851,
chr10	50660477	50747092	TCONS_00004414	0	-	50660477	50747092	255,0,0	21	6803,79,205,708,146,95,120,111,216,96,117,177,171,136,159,129,745,109,121,436,85,	0,7941,8920,17750,18543,19944,20477,21045,21595,23783,25922,30255,30914,40685,48106,53452,71601,75985,78288,80111,86530,
chr10	51025373	51130712	TCONS_00004415	0	-	51025373	51130712	255,0,0	14	2167,129,106,109,79,148,76,61,80,158,93,75,84,120,	0,2837,15475,24622,26226,39978,44260,47993,52148,62345,67875,98589,105008,105219,
chr10	51591915	51622108	TCONS_00004416	0	-	51591915	51622108	255,0,0	7	704,111,59,85,94,59,58,	0,15072,18477,20988,21302,28408,30135,
chr10	52065295	52181956	TCONS_00004419	0	-	52065295	52181956	255,0,0	7	1786,167,154,118,854,395,26,	0,2446,5726,21669,37956,112528,116635,
chr10	52065295	52199118	TCONS_00004420	0	-	52065295	52199118	255,0,0	7	1786,167,154,118,854,81,47,	0,2446,5726,21669,37956,127940,133776,
chr10	52065295	52220576	TCONS_00004421	0	-	52065295	52220576	255,0,0	7	1786,167,154,118,854,81,144,	0,2446,5726,21669,37956,127940,155137,
chr10	52065295	52383960	TCONS_00004425	0	-	52065295	52383960	255,0,0	11	1786,167,154,118,854,81,142,43,91,95,494,	0,2446,5726,21669,37956,127940,155137,161354,214295,284617,318171,
chr10	52065295	52384713	TCONS_00004426	0	-	52065295	52384713	255,0,0	11	1786,167,154,118,854,81,142,43,91,95,34,	0,2446,5726,21669,37956,127940,155137,161354,214295,284617,319384,
chr10	53454598	53459364	TCONS_00004427	0	-	53454598	53459364	255,0,0	1	4766,	0,
chr10	58116930	58121019	TCONS_00004428	0	-	58116930	58121019	255,0,0	9	1016,83,169,143,57,167,124,91,63,	0,1207,1386,1635,2306,2517,2848,3123,4026,
chr10	61548410	61666081	TCONS_00004431	0	-	61548410	61666081	255,0,0	9	4459,125,101,157,161,104,129,150,202,	0,5820,15767,18269,23982,25999,43872,63900,117469,
chr10	64553009	64568290	TCONS_00004433	0	-	64553009	64568290	255,0,0	2	725,3412,	0,11869,
chr10	64553009	64568531	TCONS_00004434	0	-	64553009	64568531	255,0,0	3	725,116,3043,	0,1043,12479,
chr10	64571663	64576355	TCONS_00004438	0	-	64571663	64576355	255,0,0	3	2565,109,526,	0,3957,4166,
chr10	64571663	64576411	TCONS_00004439	0	-	64571663	64576411	255,0,0	2	2565,791,	0,3957,
chr10	64926904	65029049	TCONS_00004444	0	-	64926904	65029049	255,0,0	25	990,132,177,140,123,131,91,169,279,215,214,128,90,153,215,202,2207,173,1679,193,144,125,106,114,627,	0,1290,9152,10572,16302,17463,18418,19070,22023,23749,25793,26200,27141,30266,31368,33331,39450,41918,46328,48118,48408,50062,52733,97506,101518,
chr10	64926904	65029112	TCONS_00004445	0	-	64926904	65029112	255,0,0	24	990,132,177,140,123,131,91,169,279,215,214,128,90,153,215,202,2207,173,1679,193,144,125,114,690,	0,1290,9152,10572,16302,17463,18418,19070,22023,23749,25793,26200,27141,30266,31368,33331,39450,41918,46328,48118,48408,50062,97506,101518,
chr10	64926904	65140247	TCONS_00004446	0	-	64926904	65140247	255,0,0	24	990,132,177,140,123,131,91,169,279,215,214,128,90,153,215,202,2207,173,1679,193,144,125,114,170,	0,1290,9152,10572,16302,17463,18418,19070,22023,23749,25793,26200,27141,30266,31368,33331,39450,41918,46328,48118,48408,50062,97506,213173,
chr10	64926904	65140247	TCONS_00004447	0	-	64926904	65140247	255,0,0	25	990,132,177,140,123,131,91,169,279,215,214,128,90,153,215,202,2207,173,1679,193,144,125,106,114,170,	0,1290,9152,10572,16302,17463,18418,19070,22023,23749,25793,26200,27141,30266,31368,33331,39450,41918,46328,48118,48408,50062,52733,97506,213173,
chr10	69681702	69833886	TCONS_00004452	0	-	69681702	69833886	255,0,0	24	1194,103,184,83,67,167,144,168,99,120,173,190,112,60,125,77,161,131,92,222,77,160,304,473,	0,3139,10651,14207,17642,18993,32649,33017,34932,44737,66717,68265,68958,69194,70253,70660,92080,103600,110832,112019,116147,122458,150937,151711,
chr10	69681702	69835142	TCONS_00004453	0	-	69681702	69835142	255,0,0	25	1194,103,184,83,67,167,144,168,99,120,173,190,112,60,125,77,161,131,92,222,77,160,304,30,242,	0,3139,10651,14207,17642,18993,32649,33017,34932,44737,66717,68265,68958,69194,70253,70660,92080,103600,110832,112019,116147,122458,150937,151711,153198,
chr10	71898881	71930258	TCONS_00004456	0	-	71898881	71930258	255,0,0	8	1016,330,132,104,66,120,74,90,	0,13137,14712,18638,21878,22493,22732,31287,
chr10	71909465	71930010	TCONS_00004458	0	-	71909465	71930010	255,0,0	8	2883,132,104,66,120,74,70,181,	0,4128,8054,11294,11909,12148,12980,20364,
chr10	71909465	71930271	TCONS_00004459	0	-	71909465	71930271	255,0,0	7	2883,132,104,66,120,74,103,	0,4128,8054,11294,11909,12148,20703,
chr10	71909465	71930275	TCONS_00004460	0	-	71909465	71930275	255,0,0	8	2883,132,104,66,120,74,70,107,	0,4128,8054,11294,11909,12148,12980,20703,
chr10	71962542	71993261	TCONS_00004461	0	-	71962542	71993261	255,0,0	11	400,43,70,86,128,127,87,120,54,59,242,	0,2086,3477,6418,6771,10676,11713,15025,15977,27554,30477,
chr10	72643190	72648433	TCONS_00004463	0	-	72643190	72648433	255,0,0	4	615,81,132,146,	0,1718,2364,5097,
chr10	73471457	73497727	TCONS_00004464	0	-	73471457	73497727	255,0,0	2	4642,243,	0,26027,
chr10	73507230	73533280	TCONS_00004465	0	-	73507230	73533280	255,0,0	7	3817,194,28,108,57,429,166,	0,4194,5501,7885,13394,14124,25884,
chr10	73575942	73611060	TCONS_00004466	0	-	73575942	73611060	255,0,0	14	1291,108,81,158,187,96,132,57,144,201,126,75,134,122,	0,2431,2845,3279,3528,4054,5690,9651,11828,12691,14940,15660,18186,34996,
chr10	73818797	73848317	TCONS_00004467	0	-	73818797	73848317	255,0,0	11	3866,138,63,219,120,115,115,115,46,9,420,	0,3985,5138,7862,8573,9147,11272,13104,13463,13862,29100,
chr10	74092296	74114686	TCONS_00004470	0	-	74092296	74114686	255,0,0	9	2079,152,173,110,80,186,146,178,164,	0,3241,3985,5663,8250,8446,10827,12411,22226,
chr10	74092296	74114719	TCONS_00004471	0	-	74092296	74114719	255,0,0	8	3393,173,110,80,186,146,178,197,	0,3985,5663,8250,8446,10827,12411,22226,
chr10	74765521	74856620	TCONS_00004472	0	-	74765521	74856620	255,0,0	15	2529,97,69,66,50,104,71,177,197,240,138,152,97,108,97,	0,4043,5205,8460,11082,24503,39217,41161,45289,47587,63082,66265,67967,69044,91002,
chr10	74765521	74856620	TCONS_00004473	0	-	74765521	74856620	255,0,0	15	2529,97,69,66,54,100,71,177,197,240,138,152,97,108,97,	0,4043,5205,8460,11082,24507,38123,41161,45289,47587,63082,66265,67967,69044,91002,
chr1	148003169	148252223	TCONS_00004477_add	0	+	148003169	148252223	255,0,0	2	1560,167,	0,248887,
chr10	74890145	74927819	TCONS_00004478	0	-	74890145	74927819	255,0,0	15	72,211,215,68,187,107,86,129,129,193,179,88,118,218,196,	0,4215,6316,7615,8921,9243,15888,17888,21905,23868,25887,26180,30046,33345,37478,
chr10	74893063	74927902	TCONS_00004479	0	-	74893063	74927902	255,0,0	14	1508,215,68,187,107,86,129,129,193,179,88,118,218,279,	0,3398,4697,6003,6325,12970,14970,18987,20950,22969,23262,27128,30427,34560,
chr10	75000694	75012419	TCONS_00004480	0	-	75000694	75012419	255,0,0	8	2583,87,255,141,57,3183,261,192,	0,2906,4985,5751,6073,6872,10826,11533,
chr10	75000694	75012437	TCONS_00004481	0	-	75000694	75012437	255,0,0	8	2583,87,255,141,495,3183,261,210,	0,2906,4985,5751,6073,6872,10826,11533,
chr10	75000694	75013006	TCONS_00004482	0	-	75000694	75013006	255,0,0	8	2583,87,255,141,3982,261,330,95,	0,2906,4985,5751,6073,10826,11533,12217,
chr10	75134774	75173864	TCONS_00004486	0	-	75134774	75173864	255,0,0	13	1201,113,76,171,171,114,95,103,65,111,205,55,95,	0,3894,4862,5014,8158,8560,12672,13295,21502,22147,23164,25786,38995,
chr10	75194417	75255607	TCONS_00004487	0	-	75194417	75255607	255,0,0	15	34,1734,30,98,82,78,126,95,78,140,146,112,125,201,45,	0,2027,5212,10065,11832,19752,32893,36027,36227,36410,36808,40259,43839,44657,61145,
chr10	75196121	75255380	TCONS_00004491	0	-	75196121	75255380	255,0,0	14	2057,30,98,85,78,126,95,78,140,146,112,125,201,65,	0,3508,8361,10128,18048,31189,34323,34523,34706,35104,38555,42135,42953,59194,
chr10	75557168	75571560	TCONS_00004495	0	-	75557168	75571560	255,0,0	15	5166,103,110,171,175,124,97,183,129,186,155,88,1346,105,329,	0,5263,5561,5778,6163,6482,7362,8176,8489,8878,9246,9697,9973,13388,14063,
chr10	75877719	75910820	TCONS_00004497	0	-	75877719	75910820	255,0,0	10	5949,145,208,134,86,138,172,276,126,308,	0,6418,8186,11146,11945,16065,18670,20145,20844,32793,
chr10	75877719	75910830	TCONS_00004498	0	-	75877719	75910830	255,0,0	9	5949,145,208,134,86,138,172,276,318,	0,6418,8186,11146,11945,16065,18670,20145,32793,
chr10	77157601	77162374	TCONS_00004499	0	-	77157601	77162374	255,0,0	2	2531,1512,	0,3261,
chr10	78644640	79397548	TCONS_00004500	0	-	78644640	79397548	255,0,0	27	2633,119,195,131,114,193,225,124,94,77,87,69,110,156,70,83,106,111,92,171,76,76,112,94,62,162,526,	0,4568,6642,25083,30053,59890,64259,68918,85091,127084,134130,142940,154645,188214,194598,199754,201605,205517,223598,225290,227484,236090,298538,299940,366312,518979,752382,
chr10	79395960	79397548	TCONS_00004501	0	-	79395960	79397548	255,0,0	2	313,526,	0,1062,
chr10	81895678	81965352	TCONS_00004506	0	-	81895678	81965352	255,0,0	17	393,550,123,59,96,94,57,80,91,114,95,88,390,116,63,49,254,	0,19440,21718,22044,23177,26012,27426,27611,28130,30161,30967,31303,33046,34877,36884,40184,69420,
chr10	88194906	88281559	TCONS_00004517	0	-	88194906	88281559	255,0,0	19	2459,96,89,208,165,116,176,77,98,112,228,112,137,153,96,101,1026,521,438,	0,2770,8125,11092,16817,18070,18506,23839,25249,26026,32129,35842,37058,37462,38728,62051,64568,82421,86215,
chr10	88194906	88281600	TCONS_00004518	0	-	88194906	88281600	255,0,0	19	2459,96,89,208,165,116,176,77,98,112,228,112,137,153,96,119,1026,521,479,	0,2770,8125,11092,16817,18070,18506,23839,25249,26026,32129,35842,37058,37462,38728,62051,64568,82421,86215,
chr10	88809999	88837237	TCONS_00004519	0	-	88809999	88837237	255,0,0	13	1628,63,92,124,81,138,138,180,95,64,56,81,52,	0,3099,7448,8907,9918,10445,10672,12413,17820,24308,25725,26333,27186,
chr10	88809999	88853743	TCONS_00004520	0	-	88809999	88853743	255,0,0	13	1628,63,92,124,81,138,138,180,95,64,56,81,54,	0,3099,7448,8907,9918,10445,10672,12413,17820,24308,25725,26333,43690,
chr10	88809999	88854749	TCONS_00004527	0	-	88809999	88854749	255,0,0	13	1628,63,92,124,81,138,138,180,95,64,56,81,668,	0,3099,7448,8907,9918,10445,10672,12413,17820,24308,25725,26333,44082,
chr10	90694829	90751148	TCONS_00004532	0	-	90694829	90751148	255,0,0	9	294,182,192,162,85,111,129,152,370,	0,2988,4434,6156,6712,8724,12185,13729,55949,
chr10	90694829	90751565	TCONS_00004533	0	-	90694829	90751565	255,0,0	9	294,182,192,162,85,111,129,152,870,	0,2988,4434,6156,6712,8724,12185,13729,55866,
chr10	90965699	90967064	TCONS_00004535	0	-	90965699	90967064	255,0,0	1	1365,	0,
chr10	90973324	91011781	TCONS_00004537	0	-	90973324	91011781	255,0,0	10	1494,72,72,147,137,110,199,118,112,288,	0,2370,8943,10116,11524,13327,14632,32108,33970,38169,
chr10	91061780	91070394	TCONS_00004538	0	-	91061780	91070394	255,0,0	2	105,4718,	0,3896,
chr10	92671866	92681402	TCONS_00004545	0	-	92671866	92681402	255,0,0	9	867,99,99,99,99,108,138,180,645,	0,3433,3672,4061,5622,6755,7021,8059,8891,
chr10	94211230	94318838	TCONS_00004547	0	-	94211230	94318838	255,0,0	25	3066,68,73,62,273,168,112,92,121,111,145,83,123,103,104,81,92,93,163,113,123,170,208,185,48,	0,4102,4885,9717,12257,14202,17405,18780,23367,24410,27803,31781,35722,39019,53320,54968,56101,56639,57254,58576,63446,80274,83104,85892,107560,
chr10	94211230	94333834	TCONS_00004548	0	-	94211230	94333834	255,0,0	25	3066,68,73,62,273,168,112,92,121,111,145,83,123,103,104,81,92,93,163,113,123,170,208,185,156,	0,4102,4885,9717,12257,14202,17405,18780,23367,24410,27803,31781,35722,39019,53320,54968,56101,56639,57254,58576,63446,80274,83104,85892,122448,
chr10	95066189	95238142	TCONS_00004549	0	-	95066189	95238142	255,0,0	54	569,148,110,191,100,142,96,89,140,149,171,92,156,126,99,12,77,166,162,99,159,182,78,109,174,146,106,115,164,132,156,193,107,125,178,117,125,39,83,44,69,104,127,116,31,51,63,129,167,88,109,92,56,206,	0,3587,4101,6587,10281,13439,16645,16837,19393,22330,23231,26788,27325,29488,31382,33720,37423,41184,43375,44764,44980,45232,47378,49195,50242,53400,55019,57528,59959,63212,66497,68330,70890,73430,74786,81364,82597,86484,89709,90814,90955,92959,94985,95799,96427,97590,97724,102354,103140,119638,124975,145617,150449,171747,
chr10	95066189	95242324	TCONS_00004551	0	-	95066189	95242324	255,0,0	54	569,148,110,191,100,142,96,89,140,149,171,92,156,126,99,12,77,166,162,99,159,182,78,109,174,146,106,115,164,132,156,193,107,125,178,117,125,39,83,44,69,104,127,116,31,51,63,129,167,88,109,92,56,461,	0,3587,4101,6587,10281,13439,16645,16837,19393,22330,23231,26788,27325,29488,31382,33720,37423,41184,43375,44764,44980,45232,47378,49195,50242,53400,55019,57528,59959,63212,66497,68330,70890,73430,74786,81364,82597,86484,89709,90814,90955,92959,94985,95799,96427,97590,97724,102354,103140,119638,124975,145617,150449,175674,
chr10	95351593	95361011	TCONS_00004552	0	-	95351593	95361011	255,0,0	6	276,213,107,137,129,84,	0,1986,8556,8830,9081,9334,
chr10	96092445	96122732	TCONS_00004554	0	-	96092445	96122732	255,0,0	21	1617,85,98,129,182,72,64,73,101,81,132,129,176,94,162,131,57,158,133,208,146,	0,1945,5088,5919,7050,7587,7744,8984,11726,12164,13736,16561,17424,19621,20207,22274,23846,24485,25394,28976,30141,
chr10	96997242	97050745	TCONS_00004555	0	-	96997242	97050745	255,0,0	7	626,118,152,200,85,152,169,	0,1082,9729,26378,31292,34147,53334,
chr10	97365710	97416601	TCONS_00004556	0	-	97365710	97416601	255,0,0	18	990,96,187,122,196,138,221,94,74,145,125,91,159,105,150,215,116,248,	0,4243,5302,7788,8012,10523,15077,19408,20749,21488,22414,27005,27537,31139,31333,37038,47336,50643,
chr10	97422931	97453694	TCONS_00004557	0	-	97422931	97453694	255,0,0	14	1126,138,154,95,108,126,81,36,116,109,128,119,124,294,	0,17297,19476,19926,20347,21324,22381,23320,23869,24072,24417,29745,30178,30469,
chr10	97948550	98031335	TCONS_00004558	0	-	97948550	98031335	255,0,0	16	3298,156,84,77,32,85,43,28,70,82,164,157,41,50,66,227,	0,8113,11280,12187,15262,15737,18216,19077,21043,27858,35031,38615,41999,53940,58189,82558,
chr10	97948550	98031347	TCONS_00004559	0	-	97948550	98031347	255,0,0	17	3298,156,84,77,32,85,43,28,70,69,82,164,157,41,50,66,239,	0,8113,11280,12187,15262,15737,18216,19077,21043,26526,27858,35031,38615,41999,53940,58189,82558,
chr10	98124417	98182861	TCONS_00004560	0	-	98124417	98182861	255,0,0	16	3562,251,214,128,126,181,161,126,196,146,117,103,116,125,106,556,	0,5404,8935,12031,14306,19926,21394,22292,30526,31214,32525,40571,45698,48531,56295,57888,
chr10	98154817	98182856	TCONS_00004568	0	-	98154817	98182856	255,0,0	8	322,146,117,103,116,125,106,551,	0,814,2125,10171,15298,18131,25895,27488,
chr10	98277864	98346640	TCONS_00004569	0	-	98277864	98346640	255,0,0	15	4223,77,84,147,69,140,131,95,167,132,78,161,123,196,150,	0,9105,9305,9923,12432,14943,25968,29787,33137,34820,41551,43870,47196,58526,68626,
chr10	98277864	98480261	TCONS_00004570	0	-	98277864	98480261	255,0,0	31	4223,77,84,147,69,140,131,95,167,132,78,161,123,196,3264,119,71,156,73,206,66,198,96,190,197,133,143,145,137,417,123,	0,9105,9305,9923,12432,14943,25968,29787,33137,34820,41551,43870,47196,58526,74263,84172,85871,91604,98531,102244,105364,108600,110290,127365,130551,133140,133401,134590,138690,191459,202274,
chr10	98351429	98480247	TCONS_00004573	0	-	98351429	98480247	255,0,0	17	3962,119,71,156,73,206,66,198,96,190,197,133,143,145,137,417,109,	0,10607,12306,18039,24966,28679,31799,35035,36725,53800,56986,59575,59836,61025,65125,117894,128709,
chr10	98510031	98510693	TCONS_00004575	0	-	98510031	98510693	255,0,0	2	37,433,	0,229,
chr10	99194744	99205755	TCONS_00004577	0	-	99194744	99205755	255,0,0	8	1564,85,51,34,89,75,116,44,	0,2203,2712,3682,6183,8249,10744,10967,
chr10	99217550	99258175	TCONS_00004578	0	-	99217550	99258175	255,0,0	31	926,101,60,165,83,187,57,101,127,69,103,100,156,150,101,82,126,79,155,139,78,75,87,62,129,70,75,86,101,49,146,	0,1006,1429,1568,1865,2252,2901,3113,3702,4034,4223,4789,6064,8011,8265,8710,8982,9711,10458,11172,11852,12335,12981,18889,19041,19553,20061,20510,23148,26309,40479,
chr1	149576193	149670273	TCONS_00004579_add	0	+	149576193	149670273	255,0,0	2	507,65,	0,94015,
chr10	99437149	99447184	TCONS_00004580	0	-	99437149	99447184	255,0,0	3	633,295,662,	0,2226,9373,
chr10	99437149	99447349	TCONS_00004581	0	-	99437149	99447349	255,0,0	3	633,297,827,	0,2226,9373,
chr10	100157199	100206671	TCONS_00004583	0	-	100157199	100206671	255,0,0	26	56,156,74,94,20,189,2178,83,114,145,66,135,62,180,168,50,70,99,100,161,109,143,138,117,114,108,	0,2659,10139,10461,13496,17566,18106,20732,22602,24926,26160,26310,26870,28098,28375,29772,32130,32348,33128,33688,36540,37829,38192,45681,47857,49364,
chr1	149576300	149670273	TCONS_00004584_add	0	+	149576300	149670273	255,0,0	3	400,55,65,	0,1307,93908,
chr1	149576452	149670273	TCONS_00004591_add	0	+	149576452	149670273	255,0,0	4	248,55,475,65,	0,1155,88015,93756,
chr1	149590729	149617432	TCONS_00004596_add	0	+	149590729	149617432	255,0,0	2	508,1668,	0,25035,
chr10	100188887	100206671	TCONS_00004603	0	-	100188887	100206671	255,0,0	10	512,99,100,161,109,143,138,117,114,108,	0,660,1440,2000,4852,6141,6504,13993,16169,17676,
chr10	100201536	100206781	TCONS_00004605	0	-	100201536	100206781	255,0,0	4	1178,117,114,218,	0,1344,3520,5027,
chr10	101156663	101191739	TCONS_00004606	0	-	101156663	101191739	255,0,0	9	780,143,166,151,105,113,124,182,1535,	0,5673,6562,6817,8849,9230,9819,23717,33541,
chr10	101370149	101379966	TCONS_00004607	0	-	101370149	101379966	255,0,0	4	974,57,229,165,	0,2150,3303,9652,
chr10	101370149	101380191	TCONS_00004611	0	-	101370149	101380191	255,0,0	3	974,1382,390,	0,2150,9652,
chr10	101909864	101945798	TCONS_00004614	0	-	101909864	101945798	255,0,0	12	2245,80,90,92,59,74,126,62,47,82,124,138,	0,4752,6037,13896,17240,24100,25837,28025,29093,33648,35406,35796,
chr10	101909864	101946092	TCONS_00004615	0	-	101909864	101946092	255,0,0	12	2245,80,90,92,59,74,126,62,47,82,124,374,	0,4752,6037,13896,17240,24100,25837,28025,29093,33648,35406,35854,
chr10	101947858	101985791	TCONS_00004616	0	-	101947858	101985791	255,0,0	20	1526,100,134,148,97,50,110,62,152,124,103,195,136,108,125,90,89,70,115,112,	0,2767,5196,5882,6323,11869,12569,13986,16404,16974,19128,21493,29893,30616,30906,31168,32486,34010,34764,37821,
chr10	101947858	101989343	TCONS_00004617	0	-	101947858	101989343	255,0,0	21	1526,100,134,148,97,50,110,62,152,124,103,195,136,108,125,90,89,70,115,95,159,	0,2767,5196,5882,6323,11869,12569,13986,16404,16974,19128,21493,29893,30616,30906,31168,32486,34010,34764,37821,41326,
chr10	101991839	102027421	TCONS_00004621	0	-	101991839	102027421	255,0,0	14	1289,98,120,210,80,115,141,85,119,215,102,79,85,94,	0,3584,4767,5939,11615,13716,14712,18165,21338,24179,28135,28883,29896,35488,
chr10	102032553	102046445	TCONS_00004624	0	-	102032553	102046445	255,0,0	5	2697,105,120,117,84,	0,7327,8137,13300,13808,
chr10	102283406	102289714	TCONS_00004625	0	-	102283406	102289714	255,0,0	5	280,156,100,127,191,	0,2749,3325,5730,6117,
chr10	102741135	102747249	TCONS_00004626	0	-	102741135	102747249	255,0,0	5	165,63,708,107,180,	0,2376,4889,5711,5934,
chr10	103544201	103575662	TCONS_00004630	0	-	103544201	103575662	255,0,0	16	2143,160,193,86,105,86,175,614,159,285,99,172,131,98,52,141,	0,2919,6451,6909,8394,9468,13535,14397,15797,19290,21600,23285,25739,28585,29110,31320,
chr10	103544201	103576787	TCONS_00004631	0	-	103544201	103576787	255,0,0	16	2143,160,193,86,105,86,175,614,159,285,99,172,131,98,52,163,	0,2919,6451,6909,8394,9468,13535,14397,15797,19290,21600,23285,25739,28585,29110,32423,
chr10	103604753	103815974	TCONS_00004632	0	-	103604753	103815974	255,0,0	26	2624,117,79,76,127,83,89,61,70,66,59,102,94,76,47,61,44,57,87,75,93,108,147,57,113,133,	0,4779,44415,94866,111600,112653,130215,145554,146972,148541,150300,156974,161543,164377,164980,166726,167836,168971,178480,178678,180159,184641,188029,188286,195016,211088,
chr10	103866329	103872004	TCONS_00004635	0	-	103866329	103872004	255,0,0	10	1751,149,124,84,123,173,103,76,45,814,	0,2456,2811,3027,3348,3956,4296,4496,4683,4861,
chr10	103866329	103874940	TCONS_00004636	0	-	103866329	103874940	255,0,0	11	1751,143,124,84,123,173,103,76,45,103,778,	0,2462,2811,3027,3348,3956,4296,4496,4683,4861,7833,
chr10	103866329	103880446	TCONS_00004639	0	-	103866329	103880446	255,0,0	11	1751,143,124,84,123,173,103,76,45,103,604,	0,2462,2811,3027,3348,3956,4296,4496,4683,4861,13513,
chr10	103866329	103880658	TCONS_00004641	0	-	103866329	103880658	255,0,0	10	2605,124,84,123,173,103,76,45,103,816,	0,2811,3027,3348,3956,4296,4496,4683,4861,13513,
chr10	104182558	104184957	TCONS_00004642	0	-	104182558	104184957	255,0,0	8	771,61,62,183,131,62,144,86,	0,855,996,1194,1462,1697,1847,2313,
chr10	104182558	104192421	TCONS_00004643	0	-	104182558	104192421	255,0,0	9	771,61,62,183,131,62,144,84,139,	0,855,996,1194,1462,1697,1847,2313,9724,
chr10	104435619	104474155	TCONS_00004644	0	-	104435619	104474155	255,0,0	6	1079,186,51,117,144,126,	0,9953,14030,23510,29483,38410,
chr10	104846725	104953038	TCONS_00004652	0	-	104846725	104953038	255,0,0	19	2940,177,61,52,171,67,108,42,84,54,94,58,92,24,96,118,74,125,46,	0,3642,3967,4595,6170,7003,7379,8970,10322,11962,12957,14076,14266,18389,18737,19620,52437,87889,106267,
chr10	104846725	104953058	TCONS_00004653	0	-	104846725	104953058	255,0,0	19	2940,177,61,52,171,67,108,42,84,54,94,58,92,96,118,74,125,144,66,	0,3642,3967,4595,6170,7003,7379,8970,10322,11962,12957,14076,14266,18737,19620,52437,87889,94216,106267,
chr10	105147764	105156240	TCONS_00004657	0	-	105147764	105156240	255,0,0	4	1159,93,96,75,	0,4183,4363,8401,
chr10	105147764	105156298	TCONS_00004660	0	-	105147764	105156298	255,0,0	5	1159,93,96,287,133,	0,4183,4363,7738,8401,
chr10	105206241	105212165	TCONS_00004663	0	-	105206241	105212165	255,0,0	4	1084,713,100,253,	0,2902,4598,5671,
chr10	105206241	105212170	TCONS_00004664	0	-	105206241	105212170	255,0,0	4	1084,713,203,258,	0,2902,4598,5671,
chr10	105206241	105212174	TCONS_00004665	0	-	105206241	105212174	255,0,0	4	1084,1414,203,262,	0,2902,4598,5671,
chr10	105206241	105212199	TCONS_00004666	0	-	105206241	105212199	255,0,0	4	1084,1414,100,287,	0,2902,4598,5671,
chr10	105353667	105421585	TCONS_00004667	0	-	105353667	105421585	255,0,0	9	9879,120,50,338,118,84,114,132,191,	0,11887,17670,18942,23286,28559,33178,67073,67727,
chr10	105353667	105422084	TCONS_00004668	0	-	105353667	105422084	255,0,0	8	9879,120,50,338,118,84,114,1344,	0,11887,17670,18942,23286,28559,33178,67073,
chr10	105353667	105610671	TCONS_00004669	0	-	105353667	105610671	255,0,0	14	9879,120,50,338,118,84,114,132,29,92,77,76,81,300,	0,11887,17670,18942,23286,28559,33178,67073,99118,130360,141822,173184,207372,256704,
chr10	105353667	105615153	TCONS_00004670	0	-	105353667	105615153	255,0,0	14	9879,120,50,338,118,84,114,132,29,92,77,76,81,201,	0,11887,17670,18942,23286,28559,33178,67073,99118,130360,141822,173184,207372,261285,
chr10	106068829	106098394	TCONS_00004672	0	-	106068829	106098394	255,0,0	2	6993,391,	0,29174,
chr10	106110367	106113308	TCONS_00004673	0	-	106110367	106113308	255,0,0	2	1318,328,	0,2613,
chr10	106110367	106113365	TCONS_00004674	0	-	106110367	106113365	255,0,0	2	1318,490,	0,2508,
chr10	111624463	111682952	TCONS_00004675	0	-	111624463	111682952	255,0,0	21	607,99,77,174,70,61,72,78,59,51,90,211,82,96,144,93,105,64,125,89,156,	0,3908,5247,6025,7086,8661,10822,13084,13294,15482,16136,17726,19361,21540,23343,23797,27016,28306,42985,50305,58333,
chr10	111624463	111683058	TCONS_00004676	0	-	111624463	111683058	255,0,0	21	607,99,77,174,70,61,72,78,59,51,90,211,82,96,144,93,105,64,125,89,92,	0,3908,5247,6025,7086,8661,10822,13084,13294,15482,16136,17726,19361,21540,23343,23797,27016,28306,42985,50305,58503,
chr10	114190061	114206687	TCONS_00004680	0	-	114190061	114206687	255,0,0	11	604,47,146,42,168,54,162,160,80,481,225,	0,1936,2072,2936,3993,8032,10230,11888,13211,14866,16401,
chr10	114190061	114207289	TCONS_00004681	0	-	114190061	114207289	255,0,0	11	604,47,146,42,168,54,162,160,92,481,827,	0,1936,2072,2936,3993,8032,10230,11888,13211,14866,16401,
chr10	116190880	116286646	TCONS_00004682	0	-	116190880	116286646	255,0,0	17	5252,81,75,8,61,65,106,92,141,48,130,36,156,78,59,88,228,	0,6722,8054,8960,9895,10600,12907,14190,16758,20502,34576,37059,41855,42757,56836,60669,95538,
[truncated: 13,754 more rows]
