# Supplementary material for: Genetic analysis of isoform usage in the human anti-viral response reveals influenza-specific regulation of ERAP2 transcripts under balancing selection
Source: Genome Res. 2018 Dec;28(12):1812–25. doi: 10.1101/gr.240390.118 (PMC6280757; doi:10.1101/gr.240390.118)
Supplement: Supplemental Material [file supp_gr.240390.118_SupplementalTable3.xlsx]

## Sheet: F;u vs Baseline
Transcript	Gene	Intercept	Beta	logLikelihood	pValue	FDR
TCONS_00004538	LIPA	-4.24721	3.68327	794.58	1.08153e-277	2.8771e-273
TCONS_00016834	IFNL4	-4.13621	4.42389	679.379	3.91225e-270	1.0407e-265
TCONS_00031237	EXT1	-4.23603	3.62241	777.72	1.74379e-266	4.63848e-262
TCONS_00001419	RABGAP1L	-4.29456	3.02204	873.007	9.52678e-247	2.53403e-242
TCONS_00017804	VAMP5	0.57526	-3.01029	700.561	3.55302e-243	9.45034e-239
TCONS_00001417	RABGAP1L	-3.70407	3.91139	597.853	7.18773e-239	1.91165e-234
TCONS_00009215	KIAA0391	-4.32156	3.04306	846.911	1.06647e-234	2.83628e-230
TCONS_00027526	NCOA7	-3.94183	3.69978	637.574	3.98253e-232	1.05911e-227
TCONS_00032504	FKBP15	-0.303714	-3.96247	1009.17	8.09184e-230	2.15186e-225
TCONS_00007383	ATP2A2	0.992275	1.34032	956.061	4.58076e-228	1.21812e-223
TCONS_00007384	ATP2A2	-0.992275	-1.34032	956.061	4.58076e-228	1.21812e-223
TCONS_00031226	EXT1	-3.70384	2.93437	702.649	4.57825e-224	1.21736e-219
TCONS_00020517	XLOC_006415	3.19239	-3.39129	546.332	1.43476e-221	3.81489e-217
TCONS_00027525	NCOA7	-3.21079	3.31853	551.385	8.168e-220	2.17171e-215
TCONS_00029232	HBP1	-4.034	3.08191	729.793	5.0819e-218	1.35107e-213
TCONS_00001718	MIA3	-0.788537	-1.89119	861.304	2.25313e-215	5.98993e-211
TCONS_00009661	HNRNPC	-3.89124	3.50749	618.148	3.93783e-215	1.04683e-210
TCONS_00002447	FUBP1	-0.898609	-2.38651	912.045	5.81643e-214	1.54618e-209
TCONS_00002448	FUBP1	0.898609	2.38651	912.045	5.81643e-214	1.54618e-209
TCONS_00017805	VAMP5	-3.13231	3.7106	503.443	9.5851e-214	2.54782e-209
TCONS_00030197	ZC3HAV1	1.25578	-2.08149	544.161	1.72011e-209	4.57189e-205
TCONS_00016842	IFNL4	-3.88278	3.52327	595.355	6.48663e-206	1.72402e-201
TCONS_00006102	FNBP4	-1.58917	2.55209	493.683	1.65001e-204	4.38524e-200
TCONS_00002359	DMRTA2	-4.11753	3.18748	694.957	1.06399e-203	2.82767e-199
TCONS_00011544	TMEM219	-2.27127	1.43719	749.132	1.96982e-200	5.2348e-196
TCONS_00011537	MVP	-1.48029	-1.22355	1017.73	4.77308e-197	1.2684e-192
TCONS_00011543	MVP	1.48029	1.22355	1017.73	4.77308e-197	1.2684e-192
TCONS_00029231	HBP1	2.08676	-1.78689	604.767	2.55846e-195	6.79833e-191
TCONS_00021180	RCAN1	-2.71231	2.18955	598.131	4.31483e-192	1.14649e-187
TCONS_00021182	RCAN1	2.71231	-2.18955	598.131	4.31483e-192	1.14649e-187
TCONS_00021260	BCL2L13	0.724129	-1.864	545.116	6.54338e-192	1.73851e-187
TCONS_00021262	BCL2L13	-0.724129	1.864	545.116	6.54338e-192	1.73851e-187
TCONS_00028753	CREB5	-2.52864	2.70137	480.327	1.63257e-190	4.33726e-186
TCONS_00026076	RANBP3L	-4.35859	2.44024	918.688	1.23309e-189	3.27583e-185
TCONS_00033060	KDM6A	-2.232	3.09365	427.683	1.03497e-186	2.7494e-182
TCONS_00009213	KIAA0391	-1.71861	-1.57303	1043.87	7.83384e-186	2.08098e-181
TCONS_00014131	DHX58	-1.08208	-3.15276	1005.43	4.29909e-185	1.14197e-180
TCONS_00028948	CCT6P1	0.154723	-3.28249	692.985	1.30006e-184	3.45322e-180
TCONS_00028057	PSMB8	-1.17165	4.35496	671.916	1.13372e-183	3.01127e-179
TCONS_00008833	ELF1	1.33107	1.15323	947.986	1.78197e-182	4.73291e-178
TCONS_00008840	ELF1	-1.33107	-1.15323	947.986	1.78197e-182	4.73291e-178
TCONS_00011474	CCDC101	2.37628	-5.81779	786.398	2.32047e-180	6.1627e-176
TCONS_00028750	CREB5	-3.93684	2.14198	865.973	5.81965e-179	1.54552e-174
TCONS_00021702	HIRA	-0.703927	-1.38364	764.554	8.73366e-179	2.31922e-174
TCONS_00024681	ACOX3	-2.825	2.29239	560.497	1.74651e-178	4.63769e-174
TCONS_00011709	CYLD	-3.71227	3.18298	554.716	3.01159e-178	7.99668e-174
TCONS_00009660	HNRNPC	0.702282	-1.93658	507.807	3.19766e-178	8.49042e-174
TCONS_00026073	RANBP3L	-3.55406	3.59336	481.396	1.16827e-177	3.10188e-173
TCONS_00029382	UBN2	-2.03123	1.67297	581.21	1.26924e-177	3.36984e-173
TCONS_00029383	UBN2	2.03123	-1.67297	581.21	1.26924e-177	3.36984e-173
TCONS_00012844	ADORA2B	3.28811	-2.99567	504.987	2.62489e-177	6.96855e-173
TCONS_00019279	LOC541471	-2.82394	3.46699	412.111	9.7464e-177	2.58728e-172
TCONS_00004570	PIK3AP1	2.64116	-3.59305	404.698	1.27027e-176	3.37192e-172
TCONS_00004573	PIK3AP1	-2.64116	3.59305	404.698	1.27027e-176	3.37192e-172
TCONS_00021550	GTPBP1	1.17635	-2.44063	446.659	3.64435e-176	9.67319e-172
TCONS_00000297	PHACTR4	0.643394	-3.47566	600.949	9.73038e-176	2.58264e-171
TCONS_00030186	C7orf49	1.22989	-2.91159	438.403	1.69062e-171	4.48691e-167
TCONS_00002346	MKNK1	-0.990748	1.32716	563.408	2.59082e-170	6.87551e-166
TCONS_00024676	ACOX3	-3.75065	2.08628	807.538	3.16846e-169	8.40814e-165
TCONS_00028825	STK17A	-1.23447	-1.51073	865.451	3.19503e-169	8.47834e-165
TCONS_00028826	STK17A	1.23447	1.51073	865.451	3.19503e-169	8.47834e-165
TCONS_00007959	TMEM194A	1.02179	-3.44146	512.308	3.30591e-169	8.77191e-165
TCONS_00029673	NT5C3A	-3.59147	1.99605	792.858	6.2084e-169	1.64727e-164
TCONS_00018176	GCA	-3.69189	2.1079	783.677	6.95085e-169	1.8442e-164
TCONS_00006149	PATL1	0.620448	-1.36006	557.149	9.09649e-169	2.41339e-164
TCONS_00021548	GTPBP1	-3.2272	2.33155	605.139	1.37406e-168	3.64537e-164
TCONS_00027666	WTAP	-1.2186	1.09557	635.787	3.4132e-168	9.05488e-164
TCONS_00001415	RABGAP1L	0.0126442	-2.10084	574.735	1.22515e-167	3.25009e-163
TCONS_00025216	IRF2	-2.11112	1.68312	564.263	1.30468e-167	3.46093e-163
TCONS_00006736	WNT5B	0.158701	-1.89192	549.205	2.05497e-167	5.45101e-163
TCONS_00014078	JUP	-4.04472	2.50536	755.887	4.90571e-167	1.30124e-162
TCONS_00021767	CHEK2	-3.80162	2.90524	597.488	1.80824e-166	4.79618e-162
TCONS_00026409	HARS	0.832735	1.4789	757.029	2.18147e-166	5.7859e-162
TCONS_00026420	HARS	-0.832735	-1.4789	757.029	2.18147e-166	5.7859e-162
TCONS_00028980	FKBP6	-1.55943	-2.67383	1036.6	4.38335e-166	1.16251e-161
TCONS_00002155	SNHG12	-0.811296	2.58449	457.493	5.33397e-165	1.41457e-160
TCONS_00002156	SNHG12	0.811296	-2.58449	457.493	5.33397e-165	1.41457e-160
TCONS_00014128	DHX58	-0.367534	-2.76961	706.257	1.17448e-164	3.11449e-160
TCONS_00029675	NT5C3A	-0.278068	-3.60994	846.482	1.4521e-164	3.85054e-160
TCONS_00028054	PSMB8	0.105456	-3.86419	805.077	2.60128e-163	6.89729e-159
TCONS_00009254	FBXO34	0.673101	1.31461	721.982	2.11577e-162	5.60974e-158
TCONS_00004199	XLOC_001310	-3.3979	3.45693	441.006	9.16667e-162	2.43027e-157
TCONS_00024395	BANK1	2.39658	-3.57057	372.467	1.30399e-161	3.45701e-157
TCONS_00024388	BANK1	-2.58647	2.87285	396.092	1.43521e-161	3.80474e-157
TCONS_00024215	TBC1D1	1.80417	-2.48838	389.907	1.97711e-161	5.24111e-157
TCONS_00014934	LPIN2	-3.26661	2.94027	473.201	2.28581e-161	6.05921e-157
TCONS_00026349	SAR1B	1.81207	0.924441	1059.39	3.03224e-161	8.03757e-157
TCONS_00026350	SAR1B	-1.81207	-0.924441	1059.39	3.03224e-161	8.03757e-157
TCONS_00011675	ADCY7	1.25695	-1.67986	474.518	3.29005e-161	8.72027e-157
TCONS_00011692	ADCY7	-1.25695	1.67986	474.518	3.29005e-161	8.72027e-157
TCONS_00010002	DICER1	-3.95347	2.40234	744.578	1.27797e-160	3.38701e-156
TCONS_00024587	RAPGEF2	-3.14559	2.19535	601.87	1.79918e-160	4.768e-156
TCONS_00017822	RMND5A	-4.153	2.50874	768.909	1.90948e-160	5.06012e-156
TCONS_00021549	GTPBP1	-3.59797	2.85945	547.944	2.1645e-160	5.7357e-156
TCONS_00029349	AHCYL2	0.516518	-3.01127	529.105	9.43486e-160	2.49996e-155
TCONS_00018178	GCA	-3.25857	2.35849	580.973	5.58008e-159	1.4785e-154
TCONS_00030117	TFEC	-1.78978	1.64885	505.131	2.49171e-157	6.60179e-153
TCONS_00006164	PATL1	-1.49238	1.83757	444.935	4.18613e-157	1.10907e-152
TCONS_00003512	PFKFB3	2.55984	-2.95345	376.512	4.29573e-157	1.13807e-152
TCONS_00003514	PFKFB3	-2.55984	2.95345	376.512	4.29573e-157	1.13807e-152
TCONS_00021174	GART	-3.53937	2.68205	562.921	5.45222e-157	1.44435e-152
TCONS_00031567	ACO1	0.454983	-4.10555	778.837	5.83155e-157	1.54478e-152
TCONS_00003091	IVNS1ABP	-1.05444	-1.52475	786.412	5.93338e-157	1.57169e-152
TCONS_00002343	MKNK1	-0.71509	-0.829232	800.341	6.29715e-157	1.66799e-152
TCONS_00031128	NBN	-2.93913	2.77552	436.094	6.3461e-157	1.68089e-152
TCONS_00014978	OSBPL1A	-2.41691	2.49756	412.269	6.62396e-157	1.75442e-152
TCONS_00010037	WARS	-0.0440581	-2.7994	615.267	1.58123e-156	4.18788e-152
TCONS_00030323	PRKAG2	-0.793181	-1.41683	725.629	1.86141e-156	4.92976e-152
TCONS_00031209	AZIN1	-3.96488	1.97977	870.344	6.26753e-156	1.65983e-151
TCONS_00018916	HNRPLL	-0.812313	1.82178	451.062	8.40779e-156	2.22655e-151
TCONS_00018924	HNRPLL	0.812313	-1.82178	451.062	8.40779e-156	2.22655e-151
TCONS_00010919	DENND4A	3.35552	-2.85226	488.302	6.37102e-155	1.68705e-150
TCONS_00010920	DENND4A	-3.35552	2.85226	488.302	6.37102e-155	1.68705e-150
TCONS_00024213	TBC1D1	-2.90918	1.60133	714.219	1.85605e-154	4.91444e-150
TCONS_00002428	PTGER3	-1.15966	2.34212	395.09	3.50575e-154	9.28218e-150
TCONS_00120191_add	LOC401074	-3.21542	2.3907	551.776	3.60755e-154	9.55136e-150
TCONS_00025370	SLC1A3	-3.98803	2.50742	708.71	4.58618e-154	1.21419e-149
TCONS_00029720	C7orf25	-4.15266	1.99642	914.893	7.81418e-154	2.06873e-149
TCONS_00029721	C7orf25	4.15266	-1.99642	914.893	7.81418e-154	2.06873e-149
TCONS_00015888	PPP1R15A	-3.83712	2.81303	597.127	9.28126e-154	2.45693e-149
TCONS_00015891	PPP1R15A	3.83712	-2.81303	597.127	9.28126e-154	2.45693e-149
TCONS_00031137	NBN	-0.481824	-2.68505	702.414	1.2937e-153	3.42443e-149
TCONS_00020969	SON	0.0798584	-1.20618	586.373	4.81897e-153	1.27553e-148
TCONS_00032159	MIR31HG	-3.94384	2.68977	648.787	5.90326e-153	1.56248e-148
TCONS_00021771	CHEK2	0.501869	-3.62289	630.34	2.76214e-152	7.31057e-148
TCONS_00018385	CFLAR	-2.21034	1.0302	773.169	1.56125e-151	4.13202e-147
TCONS_00010011	DICER1	1.8581	-2.23533	389.824	3.10606e-151	8.22018e-147
TCONS_00012825	XLOC_004138	-3.4284	2.98006	474.101	5.15195e-151	1.36341e-146
TCONS_00031849	PALM2-AKAP2	-2.80104	2.73301	408.293	9.76574e-151	2.58431e-146
TCONS_00007837	TFCP2	-1.32515	1.17056	574.104	9.89424e-151	2.61821e-146
TCONS_00032503	FKBP15	-1.39332	2.1182	390.157	2.2624e-150	5.98655e-146
TCONS_00112039_add	LINC00158	-3.56099	3.07467	486.258	2.9085e-150	7.69589e-146
TCONS_00028984	FKBP6	-0.516993	-3.16089	794.366	2.91586e-150	7.71507e-146
TCONS_00000684	HIAT1	-3.77379	2.75765	584.747	8.61715e-150	2.27992e-145
TCONS_00011753	CPNE2	-3.81463	2.81843	582.187	1.16905e-149	3.09295e-145
TCONS_00007546	GTF2H3	-2.56338	2.48165	411.582	2.40553e-149	6.36408e-145
TCONS_00007173	MARS	0.0833567	-2.0477	514.993	4.29114e-149	1.13522e-144
TCONS_00007177	MARS	-0.0833567	2.0477	514.993	4.29114e-149	1.13522e-144
TCONS_00017685	AFTPH	-3.71106	2.69454	580.333	1.35775e-148	3.59166e-144
TCONS_00000099	KIF1B	1.65836	-1.4031	531.5	1.70856e-148	4.5195e-144
TCONS_00000102	KIF1B	-1.65836	1.4031	531.5	1.70856e-148	4.5195e-144
TCONS_00017219	IL4I1	-0.217824	-1.43822	586.107	2.1538e-148	5.6968e-144
TCONS_00026295	TMED7-TICAM2	1.09399	-0.889577	651.027	2.62897e-148	6.95337e-144
TCONS_00002284	PABPC4	-2.65036	1.6324	627.114	4.04438e-148	1.06966e-143
TCONS_00025218	IRF2	-1.03875	-0.8737	833.159	5.05742e-148	1.33754e-143
TCONS_00018687	UBE2F-SCLY	1.78496	1.5162	969.103	6.12843e-148	1.62072e-143
TCONS_00018692	UBE2F-SCLY	-1.78496	-1.5162	969.103	6.12843e-148	1.62072e-143
TCONS_00014011	CCL5	-2.6449	1.52911	659.934	9.58208e-148	2.53389e-143
TCONS_00014012	CCL5	2.6449	-1.52911	659.934	9.58208e-148	2.53389e-143
TCONS_00009998	DICER1	-3.58184	2.94252	503.3	2.91077e-147	7.69667e-143
TCONS_00017178	IL4I1	-0.561026	1.76226	452.9	3.91694e-147	1.03568e-142
TCONS_00023913	CCNL1	-1.50162	-1.12989	904.157	1.40189e-146	3.70646e-142
TCONS_00017801	VAMP5	-3.31552	1.93327	681.645	3.60723e-146	9.53679e-142
TCONS_00012229	NPIPL1	-3.54187	3.06508	476.522	6.24921e-146	1.6521e-141
TCONS_00023820	ISY1-RAB43	-2.96502	1.74855	654.539	6.75651e-146	1.78615e-141
TCONS_00005632	DLAT	2.71845	-2.92707	365.293	8.33616e-146	2.20366e-141
TCONS_00005633	DLAT	-2.71845	2.92707	365.293	8.33616e-146	2.20366e-141
TCONS_00028386	REV3L	-3.94435	2.21564	760.185	1.17111e-145	3.09558e-141
TCONS_00006106	FNBP4	-1.13902	-1.20858	796.756	2.36501e-145	6.25119e-141
TCONS_00003084	FAM129A	1.82863	-3.57252	372.907	2.41464e-145	6.38213e-141
TCONS_00003085	FAM129A	-1.82863	3.57252	372.907	2.41464e-145	6.38213e-141
TCONS_00032884	XLOC_010366	-3.57039	2.78795	522.356	3.05774e-145	8.08131e-141
TCONS_00025540	PAPD4	-1.99482	1.08914	684.937	5.63189e-145	1.48839e-140
TCONS_00033208	NXT2	-4.15195	1.94929	908.009	7.24869e-145	1.91561e-140
TCONS_00008584	LRCH1	-3.28045	2.89752	445.369	9.81487e-145	2.59368e-140
TCONS_00024214	TBC1D1	-2.33874	2.14512	429.818	1.11936e-144	2.9579e-140
TCONS_00009659	HNRNPC	-1.71118	0.925738	704.803	1.59402e-144	4.21205e-140
TCONS_00030255	EZH2	1.49514	-1.4228	498.464	2.13808e-144	5.64944e-140
TCONS_00030238	EZH2	-2.32462	1.45165	609.694	3.06341e-144	8.09414e-140
TCONS_00002260	STK40	1.47879	-1.43557	492.94	4.17295e-144	1.10253e-139
TCONS_00019506	SESTD1	2.80774	-2.88543	373.575	1.6436e-143	4.3424e-139
TCONS_00008257	VPS33A	-0.590265	-0.753892	763.343	7.07637e-143	1.86951e-138
TCONS_00024885	HNRPDL	-2.29826	1.64372	538.974	1.92579e-142	5.08754e-138
TCONS_00003659	MAP3K8	0.0971634	1.47152	546.172	5.66188e-142	1.4957e-137
TCONS_00030541	ADAM9	1.37552	-1.38655	491.669	5.81178e-142	1.53524e-137
TCONS_00030542	ADAM9	-1.37552	1.38655	491.669	5.81178e-142	1.53524e-137
TCONS_00006100	FNBP4	-0.0634918	-1.62098	529.92	6.15872e-142	1.62676e-137
TCONS_00031514	CD274	3.54613	-1.59356	853.734	8.34754e-142	2.20484e-137
TCONS_00031520	CD274	-3.54613	1.59356	853.734	8.34754e-142	2.20484e-137
TCONS_00014287	SPAG9	-3.39057	1.9782	674.272	1.48211e-141	3.91441e-137
TCONS_00018379	CFLAR	-0.00684007	-1.98261	511.204	1.83796e-141	4.85405e-137
TCONS_00002257	STK40	-1.94401	1.35238	567.465	1.88301e-141	4.97285e-137
TCONS_00015524	AK311380	-0.844883	1.79551	413.505	2.32739e-141	6.14618e-137
TCONS_00015526	AK311380	0.844883	-1.79551	413.505	2.32739e-141	6.14618e-137
TCONS_00024108	SH3BP2	-2.79283	3.04694	352.527	4.75415e-141	1.25538e-136
TCONS_00018955	SRBD1	-0.860197	2.22148	387.804	5.23517e-141	1.38235e-136
TCONS_00018957	SRBD1	0.860197	-2.22148	387.804	5.23517e-141	1.38235e-136
TCONS_00025978	HRH2	-2.70554	1.70074	597.775	5.36034e-141	1.41529e-136
TCONS_00023911	CCNL1	-0.757565	1.12252	534.493	1.0368e-140	2.73737e-136
TCONS_00030199	ZC3HAV1	-3.4006	3.12963	434.642	1.47516e-140	3.89456e-136
TCONS_00012095	GSPT1	-1.05218	-0.477196	965.267	1.72121e-140	4.54398e-136
TCONS_00006276	STX5	-1.10753	-2.7689	872.611	3.48521e-140	9.2006e-136
TCONS_00020833	ZBP1	-3.1645	3.08479	395.97	4.09302e-140	1.08048e-135
TCONS_00024665	AFAP1	-3.81541	2.46449	640.553	5.34705e-140	1.41146e-135
TCONS_00004938	PRRG4	-3.87099	2.42839	663.61	1.42449e-139	3.76009e-135
TCONS_00001820	ACTN2	-3.38682	2.93115	450.783	1.53804e-139	4.05965e-135
TCONS_00022616	PPP4R2	-3.14353	2.34019	509.746	5.67117e-139	1.49685e-134
TCONS_00022618	PPP4R2	3.14353	-2.34019	509.746	5.67117e-139	1.49685e-134
TCONS_00022239	ATG7	-3.19608	2.11402	578.818	8.66658e-139	2.28728e-134
TCONS_00013171	NMT1	-0.122384	0.963892	598.325	9.22736e-139	2.43519e-134
TCONS_00013172	NMT1	0.122384	-0.963892	598.325	9.22736e-139	2.43519e-134
TCONS_00024721	ARAP2	-2.07446	1.05475	698.345	1.15274e-138	3.04197e-134
TCONS_00014943	LPIN2	1.54257	-3.0178	338.507	1.49296e-138	3.93964e-134
TCONS_00022404	CCR5	1.36998	-1.8272	393.017	1.76314e-138	4.6524e-134
TCONS_00022406	CCR5	-1.36998	1.8272	393.017	1.76314e-138	4.6524e-134
TCONS_00032374	ZCCHC6	-1.49673	-2.53291	944.587	4.27372e-138	1.12762e-133
TCONS_00032973	ZFX	-3.1503	2.82329	418.574	4.46984e-138	1.17932e-133
TCONS_00021700	HIRA	0.139267	0.900509	640.298	5.43425e-138	1.43372e-133
TCONS_00029353	AHCYL2	-3.56933	2.63503	534.431	2.58536e-137	6.82069e-133
TCONS_00011344	RMI2	-3.02946	2.48977	449.895	7.37928e-137	1.94673e-132
TCONS_00017819	RMND5A	-0.13826	-2.40054	548.484	2.38223e-136	6.28433e-132
TCONS_00003089	IVNS1ABP	-0.557846	1.22033	501.753	2.4933e-136	6.57708e-132
TCONS_00026635	HNRNPH1	-3.69098	2.31357	638.818	3.08953e-136	8.14955e-132
TCONS_00003332	OPN3	1.24746	-3.01589	363.284	5.35389e-136	1.4122e-131
TCONS_00001414	RABGAP1L	-0.109312	-1.87309	514.222	1.88e-135	4.95868e-131
TCONS_00030924	TNFRSF10B	-1.89421	1.61118	465.654	9.80276e-135	2.58548e-130
TCONS_00007746	CPNE8	-3.96493	2.24123	730.32	9.89449e-135	2.60957e-130
TCONS_00000298	PHACTR4	-0.832757	1.86687	389.528	1.5124e-134	3.98865e-130
TCONS_00002917	ARHGEF11	0.00311925	0.815377	643.294	1.72477e-134	4.54856e-130
TCONS_00022231	HRH1	0.98049	-4.10518	647.186	3.35544e-134	8.84862e-130
TCONS_00004966	HIPK3	-4.09213	2.15793	791.366	3.38228e-134	8.91908e-130
TCONS_00001748_add	AGO3	-2.81945	2.59582	389.786	3.70006e-134	9.7567e-130
TCONS_00024824	CXCL3	-1.9938	-2.19463	1042.75	5.05788e-134	1.33361e-129
TCONS_00018795	PUM2	-2.28209	2.23983	376.075	1.54942e-133	4.08521e-129
TCONS_00010429	PML	-0.134821	-0.845534	643.42	2.30247e-133	6.07046e-129
TCONS_00023089	EIF4A2	-2.09	1.35904	566.465	5.6505e-133	1.4897e-128
TCONS_00029843	RFC2	-3.33273	3.02915	419.899	7.88722e-133	2.07931e-128
TCONS_00000128	VPS13D	2.72017	-3.10295	325.487	8.57663e-133	2.26097e-128
TCONS_00004438	EGR2	-2.95194	1.71023	628.342	9.33539e-133	2.4609e-128
TCONS_00004439	EGR2	2.95194	-1.71023	628.342	9.33539e-133	2.4609e-128
TCONS_00020972	SON	-2.02833	0.767374	817.327	1.82929e-132	4.82182e-128
TCONS_00030475	PPP2R2A	2.71442	-2.20428	441.126	2.47839e-132	6.53255e-128
TCONS_00018386	CFLAR	-2.98659	2.05582	530.465	2.67099e-132	7.03992e-128
TCONS_00010863	MYO1E	3.90569	-2.37685	669.026	3.38006e-132	8.90849e-128
TCONS_00010869	MYO1E	-3.90569	2.37685	669.026	3.38006e-132	8.90849e-128
TCONS_00003335	OPN3	-3.11588	3.24545	369.348	3.7254e-132	9.81792e-128
TCONS_00112036_add	LINC00158	0.269987	-1.93446	440.809	4.0494e-132	1.06714e-127
TCONS_00004123	SEC23IP	-3.47776	2.86882	464.812	1.03336e-131	2.72311e-127
TCONS_00017608	PPM1B	-4.16834	2.15387	808.301	1.52622e-131	4.02174e-127
TCONS_00028756	CREB5	0.656414	-2.21954	383.982	7.86482e-131	2.07222e-126
TCONS_00009573	TNFAIP2	1.42706	-1.06942	565.339	8.56501e-131	2.25662e-126
TCONS_00009576	TNFAIP2	-1.42706	1.06942	565.339	8.56501e-131	2.25662e-126
TCONS_00000299	PHACTR4	-3.26288	1.92724	628.305	1.31361e-130	3.46071e-126
TCONS_00032361	ZCCHC6	-3.20568	2.05791	574.769	1.60942e-130	4.23987e-126
TCONS_00027339	TMEM63B	-3.1764	1.82947	637.36	2.21479e-130	5.83442e-126
TCONS_00021438	APOL6	-0.227028	-1.4298	539.63	2.96564e-130	7.81209e-126
TCONS_00021439	APOL6	0.227028	1.4298	539.63	2.96564e-130	7.81209e-126
TCONS_00002919	ARHGEF11	-1.71098	-0.977443	938.235	3.67182e-130	9.67157e-126
TCONS_00000129	VPS13D	-2.93078	2.59782	396.982	3.87312e-130	1.02014e-125
TCONS_00001897	CDK11B	-1.12872	-1.11063	763.334	6.43781e-130	1.69559e-125
TCONS_00021175	GART	-0.950351	-1.78513	690.067	8.89473e-130	2.34261e-125
TCONS_00024728	ARAP2	-3.79552	2.45241	614.48	9.03384e-130	2.37915e-125
TCONS_00002582	KCNA3	1.86821	-3.22133	307.951	1.26753e-129	3.33805e-125
TCONS_00001383	BLZF1	-3.91123	2.1311	735.517	1.46785e-129	3.86543e-125
TCONS_00017018	PLA2G4C	-3.33095	2.43628	503.701	2.80529e-129	7.38717e-125
TCONS_00022775	ATP2C1	-2.80596	1.17101	791.341	5.06839e-129	1.33461e-124
TCONS_00030688	OSR2	-4.20539	2.06886	840.115	8.54437e-129	2.24982e-124
TCONS_00001724	BROX	-1.81008	1.5646	450.158	1.49963e-128	3.94851e-124
TCONS_00001725	BROX	1.81008	-1.5646	450.158	1.49963e-128	3.94851e-124
TCONS_00013015	XLOC_004195	-3.65944	2.50042	564.836	3.24295e-128	8.53803e-124
TCONS_00024671	AFAP1	-3.63234	2.57438	542.311	3.59168e-128	9.45583e-124
TCONS_00024409	CISD2	-3.00237	2.18971	487.625	5.1406e-128	1.35331e-123
TCONS_00004187	KLF6	3.37406	-2.19729	569.475	5.41386e-128	1.4252e-123
TCONS_00004189	KLF6	-3.37406	2.19729	569.475	5.41386e-128	1.4252e-123
TCONS_00030185	C7orf49	-1.41428	1.65851	394.093	5.69307e-128	1.49859e-123
TCONS_00025553	PAPD4	-1.05328	-2.51148	788.975	1.19757e-127	3.15212e-123
TCONS_00027822	FAM65B	-3.13049	2.7311	405.26	2.29362e-127	6.03682e-123
TCONS_00023910	CCNL1	-1.51041	-1.63017	834.927	3.19241e-127	8.40211e-123
TCONS_00024391	BANK1	-3.80384	2.34495	637.703	4.03804e-127	1.06273e-122
TCONS_00027025	MICA	0.591308	-1.52769	420.657	4.0425e-127	1.06386e-122
TCONS_00033057	KDM6A	-0.408029	-1.86045	553.727	4.39031e-127	1.15536e-122
TCONS_00002586	KCNA3	-2.37699	3.11391	291.433	9.62558e-127	2.53297e-122
TCONS_00029683	HERPUD2	-1.44412	-1.09066	838.626	1.29068e-126	3.39629e-122
TCONS_00008610	FNDC3A	-2.65306	1.38359	656.691	1.74e-126	4.57846e-122
TCONS_00033165	XLOC_010457	-3.54083	2.6946	495.137	2.47184e-126	6.5039e-122
TCONS_00025369	SLC1A3	-3.36081	2.38058	515.267	4.33479e-126	1.14048e-121
TCONS_00024817	ANKRD17	-2.08712	1.10784	642.566	4.61073e-126	1.21304e-121
TCONS_00033689	MECP2	-3.12982	3.03693	373.407	5.70079e-126	1.49976e-121
TCONS_00031070	VCPIP1	-4.00149	1.85285	846.453	5.92316e-126	1.5582e-121
TCONS_00031071	VCPIP1	4.00149	-1.85285	846.453	5.92316e-126	1.5582e-121
TCONS_00019280	LOC541471	-3.93667	2.22416	702.807	5.14777e-125	1.35407e-120
TCONS_00000234	SRRM1	-1.78896	1.39571	483.848	1.2729e-124	3.34811e-120
TCONS_00031757	NANS	-3.39493	1.53654	785.285	1.41445e-124	3.7203e-120
TCONS_00018281	GLS	-1.15719	-1.08257	757.978	3.76503e-124	9.90166e-120
TCONS_00005622	DDX10	2.56723	-2.89175	304.527	4.19319e-124	1.10272e-119
TCONS_00005623	DDX10	-2.56723	2.89175	304.527	4.19319e-124	1.10272e-119
TCONS_00006611	TMPRSS13	-0.159924	-2.55372	546.687	4.21684e-124	1.10886e-119
TCONS_00027559	TNFAIP3	-1.67636	-1.36314	876.457	5.42782e-124	1.42725e-119
TCONS_00000750	MOV10	-2.42664	1.4336	579.711	9.54943e-124	2.51093e-119
TCONS_00007896	MMP19	-0.0748455	-3.32691	706.426	1.11263e-123	2.92543e-119
TCONS_00002427	PTGER3	-0.798083	-0.930903	700.402	1.61901e-123	4.25669e-119
TCONS_00000164	SPEN	-0.196282	-1.29042	530.241	2.04518e-123	5.37699e-119
TCONS_00025001	TNIP3	-3.06158	2.0551	522.792	2.25801e-123	5.93608e-119
TCONS_00029672	NT5C3A	-1.28434	2.6059	306.937	2.99706e-123	7.87867e-119
TCONS_00003982	XLOC_001229	-3.26706	2.87192	408.06	6.35265e-123	1.66992e-118
TCONS_00003983	XLOC_001229	3.26706	-2.87192	408.06	6.35265e-123	1.66992e-118
TCONS_00002589	LRIF1	-1.03378	1.34463	431.512	1.02026e-122	2.68175e-118
TCONS_00002590	LRIF1	1.03378	-1.34463	431.512	1.02026e-122	2.68175e-118
TCONS_00023967	LAMP3	-3.85886	2.28011	659.196	1.3461e-122	3.53797e-118
TCONS_00023969	LAMP3	3.85886	-2.28011	659.196	1.3461e-122	3.53797e-118
TCONS_00009666	HNRNPC	-1.59298	-1.30037	850.834	1.73097e-122	4.54917e-118
TCONS_00005986	HPS5	-3.18624	1.91191	591.217	2.33539e-122	6.1374e-118
TCONS_00030353	ESYT2	-3.32912	2.45788	482.004	2.60313e-122	6.84078e-118
TCONS_00020133	ZFAS1	1.51705	1.33895	826.241	4.18869e-122	1.1007e-117
TCONS_00020136	ZFAS1	-1.51705	-1.33895	826.241	4.18869e-122	1.1007e-117
TCONS_00030883	SGK223	-3.66066	2.52066	547.961	4.50699e-122	1.18426e-117
TCONS_00001447	CEP350	-2.00469	1.51179	472.497	5.26876e-122	1.38437e-117
TCONS_00004983	CD44	-2.97672	2.38849	422.233	6.222e-122	1.63477e-117
TCONS_00024044	IQCG	-1.00306	2.49606	326.521	9.60398e-122	2.52325e-117
TCONS_00024045	IQCG	1.00306	-2.49606	326.521	9.60398e-122	2.52325e-117
TCONS_00001827	KMO	1.44157	-1.60488	387.965	1.51406e-121	3.9776e-117
TCONS_00001829	KMO	-1.44157	1.60488	387.965	1.51406e-121	3.9776e-117
TCONS_00027656	WTAP	0.839662	-0.752487	619.543	1.62384e-121	4.26566e-117
TCONS_00024575	RAPGEF2	-0.905761	-2.58237	749.777	3.76359e-121	9.88619e-117
TCONS_00030930	TNFRSF10A	0.704246	-1.21933	454.55	5.64783e-121	1.48352e-116
TCONS_00030931	TNFRSF10A	-0.704246	1.21933	454.55	5.64783e-121	1.48352e-116
TCONS_00028500	LATS1	-2.61314	1.95454	450.556	7.15355e-121	1.87888e-116
TCONS_00031609	CREB3	1.07716	-1.84986	341.892	8.07607e-121	2.1211e-116
TCONS_00031610	CREB3	-1.07716	1.84986	341.892	8.07607e-121	2.1211e-116
TCONS_00004703	MCMBP	-2.03672	1.51837	472.04	8.08122e-121	2.12229e-116
TCONS_00005940	DENND5A	-2.45224	1.22513	656.753	9.40371e-121	2.46951e-116
TCONS_00002281	RRAGC	1.06257	1.30889	701.939	1.01874e-120	2.67521e-116
TCONS_00002282	RRAGC	-1.06257	-1.30889	701.939	1.01874e-120	2.67521e-116
TCONS_00032357	GOLM1	-0.681094	-1.51938	599.663	1.09325e-120	2.87065e-116
TCONS_00032360	GOLM1	0.681094	1.51938	599.663	1.09325e-120	2.87065e-116
TCONS_00014980	OSBPL1A	-1.40145	-1.21153	798.073	1.13559e-120	2.98161e-116
TCONS_00018965	ASB3	-3.31478	2.80618	421.145	3.26664e-120	8.57657e-116
TCONS_00030618	C8orf44-SGK3	-3.22848	2.19695	514.189	4.33923e-120	1.13922e-115
TCONS_00029120	ZNF655	-0.217852	0.612998	675.385	8.59792e-120	2.25721e-115
TCONS_00029121	ZNF655	0.217852	-0.612998	675.385	8.59792e-120	2.25721e-115
TCONS_00024985	CAMK2D	-2.82764	2.26593	413.181	1.91101e-119	5.01639e-115
TCONS_00012259	BOLA2	-1.27092	-1.43225	746.726	2.69949e-119	7.08536e-115
TCONS_00032373	ZCCHC6	-3.20244	1.63276	680.507	3.49574e-119	9.17492e-115
TCONS_00028770	ZNRF2	0.296991	-1.37607	442.93	4.33399e-119	1.13746e-114
TCONS_00002339	MKNK1	-0.39776	-0.751148	667.192	5.58327e-119	1.46527e-114
TCONS_00033167	XLOC_010457	-3.58131	2.53443	519.329	6.64075e-119	1.74273e-114
TCONS_00019549	STK17B	-2.99184	1.93409	528.585	7.8786e-119	2.0675e-114
TCONS_00019551	STK17B	2.99184	-1.93409	528.585	7.8786e-119	2.0675e-114
TCONS_00017708	GMCL1	-0.865265	-1.15366	663.381	1.42509e-118	3.73943e-114
TCONS_00030312	PRKAG2	-1.95201	1.53125	448.016	3.54288e-118	9.29617e-114
TCONS_00031131	NBN	-0.176565	-1.31759	507.954	7.37081e-118	1.93395e-113
TCONS_00007544	GTF2H3	0.976353	-1.97926	324.962	2.83378e-117	7.43471e-113
TCONS_00031135	NBN	-2.66451	1.2415	689.951	4.03809e-117	1.05939e-112
TCONS_00033569	MORF4L2	-0.902418	-1.81571	645.342	9.36235e-117	2.45593e-112
TCONS_00025446	GPBP1	0.665534	-1.25677	433.811	1.73474e-116	4.55038e-112
TCONS_00001702	RPS6KC1	-2.58254	2.37964	343.93	2.75342e-116	7.22168e-112
TCONS_00033236	IL13RA1	-1.21111	0.613469	717.259	3.4028e-116	8.92452e-112
TCONS_00026627	HNRNPH1	-0.75143	-0.773119	710.307	5.53891e-116	1.45264e-111
TCONS_00030474	PPP2R2A	-2.88095	1.55009	618.774	7.44873e-116	1.95343e-111
TCONS_00011086	RHCG	-3.41418	2.63851	457.221	9.50066e-116	2.49145e-111
TCONS_00021362	ASPHD2	-3.62686	2.46915	537.428	9.68668e-116	2.54014e-111
TCONS_00007964	TMEM194A	-1.81068	-2.11963	937.069	1.71881e-115	4.50708e-111
TCONS_00022749	DIRC2	-0.590176	-0.991499	623.478	1.93186e-115	5.06554e-111
TCONS_00022750	DIRC2	0.590176	0.991499	623.478	1.93186e-115	5.06554e-111
TCONS_00032138	IFNA14	-3.44616	2.58605	471.755	2.03153e-115	5.32647e-111
TCONS_00025412	ZNF131	0.364617	-1.31502	434.75	4.47428e-115	1.17307e-110
TCONS_00000648	GBP1P1	-3.72557	2.20445	624.698	5.13453e-115	1.34612e-110
TCONS_00033692	MECP2	-3.22622	2.10533	523.437	9.68926e-115	2.54004e-110
TCONS_00013598	ABR	0.399536	1.49492	523.628	1.17951e-114	3.09197e-110
TCONS_00002798	RAB13	0.109158	-0.962372	530.603	2.05375e-114	5.3835e-110
TCONS_00002801	RAB13	-0.109158	0.962372	530.603	2.05375e-114	5.3835e-110
TCONS_00030486	PTK2B	1.33898	-1.83465	323.328	2.9476e-114	7.72596e-110
TCONS_00030489	PTK2B	-1.33898	1.83465	323.328	2.9476e-114	7.72596e-110
TCONS_00005558	PCF11	-0.314208	-1.12247	547.391	3.42204e-114	8.96884e-110
TCONS_00005559	PCF11	0.314208	1.12247	547.391	3.42204e-114	8.96884e-110
TCONS_00002815	ADAR	-2.18616	1.20947	585.719	5.14717e-114	1.34892e-109
TCONS_00022476	RBM5	-1.88387	-1.03386	934.502	5.26265e-114	1.37913e-109
TCONS_00022477	RBM5	1.88387	1.03386	934.502	5.26265e-114	1.37913e-109
TCONS_00033414	SH3KBP1	-3.94017	2.1657	692.951	6.80251e-114	1.78253e-109
TCONS_00033415	SH3KBP1	3.94017	-2.1657	692.951	6.80251e-114	1.78253e-109
TCONS_00029702	XLOC_009295	2.08248	-1.20996	564.003	1.19802e-113	3.13893e-109
TCONS_00029703	XLOC_009295	-2.08248	1.20996	564.003	1.19802e-113	3.13893e-109
TCONS_00019123	MOB1A	0.77551	-0.760734	588.904	1.3757e-113	3.60419e-109
TCONS_00019124	MOB1A	-0.77551	0.760734	588.904	1.3757e-113	3.60419e-109
TCONS_00032991	ZFX	-0.216924	-3.07965	675.672	1.48841e-113	3.89918e-109
TCONS_00023077	EIF4A2	-0.438646	-2.41129	576.382	1.98862e-113	5.2094e-109
TCONS_00014105	DHX58	-3.23519	1.35743	781.343	1.99538e-113	5.22689e-109
TCONS_00002918	ARHGEF11	-1.4039	-1.09585	788.936	3.29472e-113	8.63019e-109
TCONS_00018454	NRP2	-2.9979	1.20222	782.869	3.63686e-113	9.52603e-109
TCONS_00015070	BCL2	2.38741	-2.80431	270.756	4.11813e-113	1.07862e-108
TCONS_00015071	BCL2	-2.38741	2.80431	270.756	4.11813e-113	1.07862e-108
TCONS_00028340	ASCC3	-2.51316	1.62568	501.719	6.58053e-113	1.72344e-108
TCONS_00011708	CYLD	-0.861027	-1.92755	631.058	7.84295e-113	2.05399e-108
TCONS_00018639	EIF4E2	-1.14475	-0.430058	934.993	8.94095e-113	2.34146e-108
TCONS_00018642	EIF4E2	1.14475	0.430058	934.993	8.94095e-113	2.34146e-108
TCONS_00001054	UBAP2L	-2.24152	0.926793	720.936	1.59373e-112	4.17333e-108
TCONS_00129181_add	TRMT44	-3.22849	1.88629	581.867	1.68212e-112	4.40463e-108
TCONS_00020920	BACH1	3.92322	-1.94838	752.349	1.89161e-112	4.953e-108
TCONS_00020925	BACH1	-3.92322	1.94838	752.349	1.89161e-112	4.953e-108
TCONS_00001699	RPS6KC1	1.21477	-3.16755	344.471	1.91203e-112	5.00609e-108
TCONS_00033056	KDM6A	-0.994682	-2.42685	733.63	2.12431e-112	5.56165e-108
TCONS_00009029	ANKRD10	-2.38774	-1.86321	1084.74	3.60862e-112	9.44736e-108
TCONS_00007240	MDM2	0.65023	-1.89237	340.557	4.32748e-112	1.13289e-107
TCONS_00024677	ACOX3	-0.312677	-2.00929	499.418	8.30416e-112	2.17386e-107
TCONS_00026288	FEM1C	-3.83435	1.80324	774.425	1.19963e-111	3.14016e-107
TCONS_00013238	CDK5RAP3	-0.0378901	-1.00806	525.193	1.20293e-111	3.14866e-107
TCONS_00008921	INTS6	0.160651	0.774691	607.322	1.20821e-111	3.16238e-107
TCONS_00008922	INTS6	-0.160651	-0.774691	607.322	1.20821e-111	3.16238e-107
TCONS_00022747	PARP14	-2.12253	1.7048	405.882	1.79581e-111	4.7e-107
TCONS_00023643	EIF4E3	-0.218516	-2.07915	481.462	3.3573e-111	8.78639e-107
TCONS_00011706	CYLD	-3.20059	1.77527	607.017	3.39162e-111	8.87586e-107
TCONS_00027238	SRSF3	-2.11839	1.79696	380.979	5.50981e-111	1.44186e-106
TCONS_00027240	SRSF3	2.11839	-1.79696	380.979	5.50981e-111	1.44186e-106
TCONS_00017217	IL4I1	-1.48952	-1.08975	806.12	6.97244e-111	1.82448e-106
TCONS_00020052	SRSF6	-2.22117	1.83775	385.457	7.37628e-111	1.93008e-106
TCONS_00026623	HNRNPH1	-1.01367	-0.764249	750.959	1.22719e-110	3.21094e-106
TCONS_00029521	GALNT11	1.22699	-1.87932	306.245	1.78159e-110	4.66134e-106
TCONS_00025422	PARP8	-3.74533	2.28912	597.269	2.19414e-110	5.74054e-106
TCONS_00029605	DAGLB	-1.03346	-0.751083	758.343	2.48101e-110	6.49083e-106
TCONS_00029606	DAGLB	1.03346	0.751083	758.343	2.48101e-110	6.49083e-106
TCONS_00019895	RIN2	-2.69178	2.62397	311.088	2.97336e-110	7.77831e-106
TCONS_00019282	LOC541471	-3.82533	1.88165	739.774	4.21516e-110	1.10264e-105
TCONS_00023661	CGGBP1	-3.18585	2.12147	496.933	4.60199e-110	1.20379e-105
TCONS_00007215	TBK1	3.18508	-1.62289	652.617	5.61179e-110	1.46788e-105
TCONS_00007217	TBK1	-3.18508	1.62289	652.617	5.61179e-110	1.46788e-105
TCONS_00005723	EI24	-3.28046	2.64061	418.792	7.26184e-110	1.89934e-105
TCONS_00013960	SSH2	-1.13836	1.64974	335.093	1.41369e-109	3.69736e-105
TCONS_00017791	MAT2A	-0.898707	1.1374	442.864	1.70749e-109	4.46561e-105
TCONS_00028769	ZNRF2	-0.884885	1.33154	393.468	2.1929e-109	5.73488e-105
TCONS_00024368	HERC5	-3.72917	1.65638	791.088	2.71932e-109	7.1113e-105
TCONS_00024369	HERC5	3.72917	-1.65638	791.088	2.71932e-109	7.1113e-105
TCONS_00017839	ARID5A	-0.475255	-0.868688	613.687	3.43829e-109	8.99078e-105
TCONS_00017840	ARID5A	0.475255	0.868688	613.687	3.43829e-109	8.99078e-105
TCONS_00031257	ENPP2	-3.51812	1.91616	638.585	4.48709e-109	1.17324e-104
TCONS_00000437	SMAP2	-0.406042	-1.17693	538.802	6.51916e-109	1.7045e-104
TCONS_00012834	XLOC_004138	-3.89001	2.16187	667.259	7.52043e-109	1.96622e-104
TCONS_00027492	DSE	-0.519664	0.58014	660.266	8.6571e-109	2.26331e-104
TCONS_00018545	PNKD	-1.58703	-1.54549	806.612	1.01995e-108	2.66645e-104
TCONS_00014982	OSBPL1A	0.962884	-1.3223	393.876	1.20392e-108	3.14716e-104
TCONS_00012433	GLG1	-0.981063	-0.91599	699.295	1.4994e-108	3.91944e-104
TCONS_00012434	GLG1	0.981063	0.91599	699.295	1.4994e-108	3.91944e-104
TCONS_00009214	KIAA0391	1.68416	-0.607615	776.161	2.2227e-108	5.80968e-104
TCONS_00003307	TARBP1	-1.81192	2.03174	296.098	3.65074e-108	9.54194e-104
TCONS_00027097	CFB	0.539877	-3.25064	512.891	5.82515e-108	1.52246e-103
TCONS_00008077	TMCC3	-2.42564	2.2217	326.094	6.58163e-108	1.72011e-103
TCONS_00006608	TMPRSS13	-3.269	1.942	560.884	1.32485e-107	3.46237e-103
TCONS_00029348	AHCYL2	-1.41444	-1.96849	779.133	1.49642e-107	3.91059e-103
TCONS_00012231	NPIPL1	-2.49576	2.51917	290.893	1.65976e-107	4.33727e-103
TCONS_00001058	UBAP2L	-1.82772	-0.848699	928.346	3.90851e-107	1.02133e-102
TCONS_00011746	NLRC5	-2.25879	1.69124	417.582	5.02826e-107	1.31388e-102
TCONS_00016719	SUGP2	-0.328657	-0.777822	612.492	6.32058e-107	1.6515e-102
TCONS_00022038_add	AGAP9	-1.21143	-1.00577	732.503	7.55295e-107	1.97344e-102
TCONS_00029674	NT5C3A	-1.06496	-2.60673	794.244	1.18052e-106	3.08434e-102
TCONS_00028951	CCT6P1	-4.00827	1.97676	751.913	1.57435e-106	4.11315e-102
TCONS_00027029	MICB	-2.997	2.54525	363.588	4.82558e-106	1.26068e-101
TCONS_00025793	MATR3	-3.47814	1.77896	664.688	5.19098e-106	1.35609e-101
TCONS_00000037	TNFRSF14	-0.0858988	0.855377	539.349	5.69013e-106	1.48643e-101
TCONS_00029641	HNRNPA2B1	-1.65515	-1.77397	830.007	5.73436e-106	1.49793e-101
TCONS_00031533	CNTLN	1.0825	-0.848632	546.717	5.77774e-106	1.5092e-101
TCONS_00031534	CNTLN	-1.0825	0.848632	546.717	5.77774e-106	1.5092e-101
TCONS_00006000	CD59	-1.42471	-1.05606	777.455	9.27945e-106	2.4237e-101
TCONS_00025444	GPBP1	-2.32598	1.56493	462.476	1.13555e-105	2.96584e-101
TCONS_00013577	METRNL	1.06803	2.12916	692.728	3.0887e-105	8.06677e-101
TCONS_00013585	METRNL	-1.06803	-2.12916	692.728	3.0887e-105	8.06677e-101
TCONS_00023996	BCL6	-3.84116	2.07094	670.194	3.52079e-105	9.19455e-101
TCONS_00017798	MAT2A	-1.41315	-1.52116	745.466	6.65429e-105	1.73764e-100
TCONS_00002489	CCBL2	-1.29558	0.837	570.305	1.30618e-104	3.41069e-100
TCONS_00025587	PAPD4	-3.26611	1.68605	635.291	1.46514e-104	3.82563e-100
TCONS_00029037	GTF2I	-3.604	1.78776	692.598	1.51949e-104	3.96738e-100
TCONS_00010386	PIAS1	-1.16044	-1.06316	703.773	2.24842e-104	5.87041e-100
TCONS_00011652	ZNF267	2.72454	-1.27455	652.539	2.42569e-104	6.33299e-100
TCONS_00011653	ZNF267	-2.72454	1.27455	652.539	2.42569e-104	6.33299e-100
TCONS_00010995	SIN3A	-0.30683	-1.16448	509.859	2.55578e-104	6.67211e-100
TCONS_00011000	SIN3A	0.30683	1.16448	509.859	2.55578e-104	6.67211e-100
TCONS_00023149	FYTTD1	3.29161	-1.37872	760.698	2.83772e-104	7.40759e-100
TCONS_00023150	FYTTD1	-3.29161	1.37872	760.698	2.83772e-104	7.40759e-100
TCONS_00000286	STX12	3.58631	-1.96507	627.64	4.67462e-104	1.22017e-99
TCONS_00000287	STX12	-3.58631	1.96507	627.64	4.67462e-104	1.22017e-99
TCONS_00032967	SAT1	-2.61318	1.00348	746.503	9.46408e-104	2.47013e-99
TCONS_00024173	CD38	-0.951211	1.79022	302.666	1.12218e-103	2.92879e-99
TCONS_00018893	CEBPZ	3.45511	-2.08209	556.69	1.65014e-103	4.30653e-99
TCONS_00018894	CEBPZ	-3.45511	2.08209	556.69	1.65014e-103	4.30653e-99
TCONS_00031251	ENPP2	-3.83128	2.08953	657.69	1.71961e-103	4.48751e-99
TCONS_00011752	CPNE2	-3.87675	2.09949	667.801	1.93288e-103	5.04365e-99
TCONS_00000137	PRDM2	-0.580429	-1.10955	564.762	1.93582e-103	5.05113e-99
TCONS_00000140	PRDM2	0.580429	1.10955	564.762	1.93582e-103	5.05113e-99
TCONS_00031262	ENPP2	0.0150754	-0.877727	529.592	3.65967e-103	9.54845e-99
TCONS_00005873	IGF2	-3.06593	2.68822	362.347	3.87478e-103	1.01093e-98
TCONS_00026078	RANBP3L	-4.02572	1.96947	750.314	3.94274e-103	1.02862e-98
TCONS_00017553	FOSL2	-3.16311	1.66399	611.46	4.29998e-103	1.12178e-98
TCONS_00023204	XPC	3.085	-2.14657	448.684	4.82494e-103	1.25868e-98
TCONS_00023205	XPC	-3.085	2.14657	448.684	4.82494e-103	1.25868e-98
TCONS_00032654	TOR1A	2.83168	-1.38459	630.239	6.52688e-103	1.70254e-98
TCONS_00032655	TOR1A	-2.83168	1.38459	630.239	6.52688e-103	1.70254e-98
TCONS_00027520	NCOA7	-1.1616	-2.56002	811.6	6.78032e-103	1.76851e-98
TCONS_00016679	AKAP8L	-1.62117	1.5356	361.489	7.98074e-103	2.08154e-98
TCONS_00018614	SP140L	-1.55042	-2.37253	884.575	1.02449e-102	2.67198e-98
TCONS_00008264	RSRC2	-1.68396	1.15415	483.952	1.67097e-102	4.35788e-98
TCONS_00000682	HIAT1	1.66581	-1.1378	487.059	2.13134e-102	5.55833e-98
TCONS_00009387	PCNX	-4.07557	1.91257	782.085	2.20987e-102	5.76291e-98
TCONS_00007242	MDM2	-2.86683	1.67604	531.108	2.95984e-102	7.71837e-98
TCONS_00009559	PPP2R5C	-0.0306886	0.412967	758.836	3.69783e-102	9.64246e-98
TCONS_00010432	PML	-1.21695	1.11093	445.18	3.86213e-102	1.00705e-97
TCONS_00021837	APOL3	-0.990648	-1.64583	623.943	4.09778e-102	1.06845e-97
TCONS_00017600	GALM	-2.82918	1.1403	731.949	4.35957e-102	1.13667e-97
TCONS_00017601	GALM	2.82918	-1.1403	731.949	4.35957e-102	1.13667e-97
TCONS_00022704	QTRTD1	1.45609	-0.972686	522.102	5.28116e-102	1.37685e-97
TCONS_00007295	TMPO	-1.26704	0.552528	723.061	5.30827e-102	1.38387e-97
TCONS_00020128	DDX27	1.36921	-2.8162	261.323	6.90468e-102	1.79998e-97
TCONS_00003623	PDSS1	-3.43036	2.34667	485.376	7.37479e-102	1.92246e-97
TCONS_00021192	RUNX1	-1.21313	-1.26329	689.066	8.97231e-102	2.33881e-97
TCONS_00032592	DENND1A	0.527333	-0.87146	501.512	1.02265e-101	2.66563e-97
TCONS_00032594	DENND1A	-0.527333	0.87146	501.512	1.02265e-101	2.66563e-97
TCONS_00018605	SP140	-1.35167	0.924156	527.967	1.69545e-101	4.41902e-97
TCONS_00022665	ALCAM	-2.66799	1.27321	630.193	1.73809e-101	4.52998e-97
TCONS_00022666	ALCAM	2.66799	-1.27321	630.193	1.73809e-101	4.52998e-97
TCONS_00026293	TMED7-TICAM2	-3.16026	1.99817	500.204	1.95265e-101	5.0888e-97
TCONS_00009859	MAX	-2.51106	1.06102	684.802	3.01562e-101	7.85871e-97
TCONS_00004459	SAR1A	0.625808	-1.34229	371.648	3.8812e-101	1.01136e-96
TCONS_00006330	MAP3K11	-3.69819	1.58102	786.717	4.01489e-101	1.04616e-96
TCONS_00009779	PPP2R3C	-2.16314	2.78073	233.112	4.10364e-101	1.06924e-96
TCONS_00010423	PML	-1.27682	-0.689269	805.374	6.48474e-101	1.6896e-96
TCONS_00018983	CCDC88A	-3.11686	1.2973	735.103	1.32737e-100	3.45832e-96
TCONS_00014836	RNF138	-1.11789	-1.53485	651.752	1.54221e-100	4.01792e-96
TCONS_00014837	RNF138	1.11789	1.53485	651.752	1.54221e-100	4.01792e-96
TCONS_00032972	ZFX	-2.49507	1.81456	405.765	1.55492e-100	4.05071e-96
TCONS_00067488_add	TAF1C	-0.175672	-2.72149	557.703	3.88329e-100	1.0116e-95
TCONS_00096494_add	EPB41L5	-2.71226	2.26514	340.853	6.41285e-100	1.67048e-95
TCONS_00008601	FNDC3A	-1.56718	-0.874141	827.235	1.19775e-99	3.11978e-95
TCONS_00030091	TFEC	-0.442023	-1.00586	546.34	1.24545e-99	3.24378e-95
TCONS_00028535	XLOC_008908	-3.06782	2.55581	368.846	1.53006e-99	3.98489e-95
TCONS_00022232	ATG7	2.01922	-2.36196	243.653	1.75355e-99	4.56677e-95
TCONS_00024729	ARAP2	-0.710676	-1.97543	563.644	1.78542e-99	4.64958e-95
TCONS_00018612	SP140L	-1.32492	1.66441	304.403	3.38515e-99	8.81527e-95
TCONS_00030051	ATXN7L1	-2.79948	1.7772	474.312	3.51002e-99	9.14008e-95
TCONS_00022778	ATP2C1	-1.32632	-1.46617	704.727	3.70582e-99	9.64958e-95
TCONS_00025582	PAPD4	-0.0787362	-0.661749	605.697	5.133e-99	1.33653e-94
TCONS_00000531	XLOC_000182	-3.46827	1.52158	736.336	5.51096e-99	1.43489e-94
TCONS_00079644_add	GREB1L	-3.34582	2.28304	470.576	6.33451e-99	1.64925e-94
TCONS_00000604	IFI44L	-1.39209	1.52259	334.628	6.76812e-99	1.76208e-94
TCONS_00002425	PTGER3	-0.591624	-2.15588	552.131	7.83274e-99	2.03918e-94
TCONS_00031200	UBR5	-2.12305	1.49327	427.321	7.83501e-99	2.03969e-94
TCONS_00029948	SAMD9L	-1.18193	-1.94566	688.863	8.50077e-99	2.21292e-94
TCONS_00031646	ANKRD20A3	-1.83537	-1.98	892.508	8.64916e-99	2.25146e-94
TCONS_00031250	ENPP2	-2.14814	0.964729	638.357	1.03693e-98	2.69914e-94
TCONS_00014286	SPAG9	0.550299	-0.922803	473.429	1.18304e-98	3.07934e-94
TCONS_00031328	ST3GAL1	0.614895	-0.988489	451.182	1.30412e-98	3.39436e-94
TCONS_00031329	ST3GAL1	-0.614895	0.988489	451.182	1.30412e-98	3.39436e-94
TCONS_00004979	CD44	2.03249	-1.64777	368.271	1.47413e-98	3.83642e-94
TCONS_00033562	MORF4L2	-3.04684	1.52018	618.112	4.20942e-98	1.09542e-93
TCONS_00030967	WHSC1L1	-0.578808	0.796956	519.15	5.10631e-98	1.32877e-93
TCONS_00019044	SPRED2	-0.505917	1.63816	329.984	6.42267e-98	1.67118e-93
TCONS_00000870	VPS45	2.74054	-1.57835	521.078	6.4955e-98	1.69006e-93
TCONS_00000871	VPS45	-2.74054	1.57835	521.078	6.4955e-98	1.69006e-93
TCONS_00030958	RAB11FIP1	1.01	-0.594785	649.035	7.22219e-98	1.879e-93
TCONS_00030959	RAB11FIP1	-1.01	0.594785	649.035	7.22219e-98	1.879e-93
TCONS_00025704	TNFAIP8	-1.43759	-0.795853	804.622	9.20153e-98	2.39378e-93
TCONS_00017820	RMND5A	0.0669747	-2.11212	391.334	9.5129e-98	2.47468e-93
TCONS_00018250	ITGAV	-3.62967	1.62106	739.946	1.5456e-97	4.02056e-93
TCONS_00002034	NBPF1	-0.0876126	-0.622141	619.585	2.58852e-97	6.73327e-93
TCONS_00028896	UPP1	-1.52458	-0.986766	788.398	2.64259e-97	6.87364e-93
TCONS_00000039	TNFRSF14	-0.586811	-0.680558	655.576	3.64885e-97	9.49067e-93
TCONS_00140443_add	NRG2	-3.09041	2.49539	377.197	3.65559e-97	9.50783e-93
TCONS_00029526	INSIG1	0.654695	-1.0682	421.659	5.64943e-97	1.4693e-92
TCONS_00000038	TNFRSF14	-1.62966	-0.60443	913.114	5.87857e-97	1.52884e-92
TCONS_00032529	TNFSF8	-1.96832	1.64938	354.019	5.92479e-97	1.5408e-92
TCONS_00032530	TNFSF8	1.96832	-1.64938	354.019	5.92479e-97	1.5408e-92
TCONS_00010887	HERC1	-3.18768	1.91989	516.39	6.2171e-97	1.61669e-92
TCONS_00017662	VRK2	-0.401764	0.517376	660.534	6.87431e-97	1.78753e-92
TCONS_00017030	PLA2G4C	0.339801	-2.51536	379.942	7.72006e-97	2.00737e-92
TCONS_00024359	HERC6	-0.859872	1.55214	314.677	7.83173e-97	2.03633e-92
TCONS_00012830	XLOC_004138	1.23082	-3.26194	352.559	8.07381e-97	2.09911e-92
TCONS_00028291	FAM46A	-3.37647	1.80382	601.227	8.26765e-97	2.14942e-92
TCONS_00006616	TMPRSS13	-2.36543	1.57511	438.782	1.1151e-96	2.89892e-92
TCONS_00004458	SAR1A	-3.34415	1.39734	744.115	1.16691e-96	3.0335e-92
TCONS_00014839	DTNA	0.571279	-1.17119	395.247	1.42589e-96	3.70661e-92
TCONS_00014840	DTNA	-0.571279	1.17119	395.247	1.42589e-96	3.70661e-92
TCONS_00001055	UBAP2L	-1.20393	-1.05487	691.768	1.48968e-96	3.87212e-92
TCONS_00020540	TMX4	-3.41708	2.2998	481.386	2.37366e-96	6.16914e-92
TCONS_00020541	TMX4	3.41708	-2.2998	481.386	2.37366e-96	6.16914e-92
TCONS_00030658	RIPK2	-1.98393	-1.14993	899.985	2.43439e-96	6.3265e-92
TCONS_00030660	RIPK2	1.98393	1.14993	899.985	2.43439e-96	6.3265e-92
TCONS_00017793	MAT2A	-1.95649	-0.973671	910.766	2.64962e-96	6.8853e-92
TCONS_00029044	GTF2I	-2.48404	1.29474	560.816	4.18776e-96	1.08819e-91
TCONS_00010078	GPR132	-1.70112	-1.02179	828.831	4.99567e-96	1.29807e-91
TCONS_00017567	YIPF4	-1.61399	-0.657638	886.3	5.21905e-96	1.35607e-91
TCONS_00017568	YIPF4	1.61399	0.657638	886.3	5.21905e-96	1.35607e-91
TCONS_00025038	OTUD4	-2.80827	1.34067	619.966	6.19597e-96	1.60978e-91
TCONS_00001042	UBAP2L	0.161807	0.356724	797.622	7.41506e-96	1.92643e-91
TCONS_00014551	SRSF2	-2.84989	1.10029	735.875	1.31209e-95	3.40867e-91
TCONS_00000130	VPS13D	-3.68411	2.12496	588.125	1.34305e-95	3.48898e-91
TCONS_00027579	PHACTR2	-0.461414	-2.25745	527.649	1.35097e-95	3.5094e-91
TCONS_00027580	PHACTR2	0.461414	2.25745	527.649	1.35097e-95	3.5094e-91
TCONS_00009028	ANKRD10	-1.93897	1.33774	436.172	1.88228e-95	4.88922e-91
TCONS_00007676	CLEC7A	-1.52687	-0.808546	816.95	3.0945e-95	8.03764e-91
TCONS_00026703	MGAT1	-3.10115	1.13839	786.124	3.19402e-95	8.29583e-91
TCONS_00026282	REEP5	0.697717	0.855391	612.847	3.86644e-95	1.00419e-90
TCONS_00026283	REEP5	-0.697717	-0.855391	612.847	3.86644e-95	1.00419e-90
TCONS_00013281	KAT7	3.07371	-2.13452	428.179	4.51806e-95	1.1733e-90
TCONS_00013282	KAT7	-3.07371	2.13452	428.179	4.51806e-95	1.1733e-90
TCONS_00027216	UHRF1BP1	2.72454	-2.53732	296.175	6.75459e-95	1.75396e-90
TCONS_00027217	UHRF1BP1	-2.72454	2.53732	296.175	6.75459e-95	1.75396e-90
TCONS_00025217	IRF2	0.535989	-0.631202	587.464	8.25917e-95	2.14449e-90
TCONS_00003311	IRF2BP2	-3.72374	2.0591	614.291	8.44586e-95	2.19288e-90
TCONS_00019538	STAT1	-1.40095	-0.908792	760.679	8.76229e-95	2.27495e-90
TCONS_00019544	STAT1	1.40095	0.908792	760.679	8.76229e-95	2.27495e-90
TCONS_00031802	STX17	-0.616534	-0.711108	641.325	9.40265e-95	2.44102e-90
TCONS_00031803	STX17	0.616534	0.711108	641.325	9.40265e-95	2.44102e-90
TCONS_00022884	RNF13	-1.55032	0.612465	704.334	1.31197e-94	3.40574e-90
TCONS_00019892	RIN2	1.20876	-2.35114	235.318	1.6139e-94	4.18937e-90
TCONS_00029551	ADAP1	1.26124	-2.11593	237.525	2.6352e-94	6.84019e-90
TCONS_00029552	ADAP1	-1.26124	2.11593	237.525	2.6352e-94	6.84019e-90
TCONS_00032165	MOB3B	-2.12544	1.47687	417.649	4.41665e-94	1.14634e-89
TCONS_00032166	MOB3B	2.12544	-1.47687	417.649	4.41665e-94	1.14634e-89
TCONS_00010545	ZNF710	-0.799648	-0.928366	612.373	4.76378e-94	1.23634e-89
TCONS_00008620	SETDB2	-2.72795	2.09278	361.918	5.24688e-94	1.36167e-89
TCONS_00007757	SCAF11	3.26653	-1.22835	787.362	5.64809e-94	1.46574e-89
TCONS_00007759	SCAF11	-3.26653	1.22835	787.362	5.64809e-94	1.46574e-89
TCONS_00000861	HIST2H4A	-2.71393	1.33784	590.979	6.8438e-94	1.77576e-89
TCONS_00000862	HIST2H4A	2.71393	-1.33784	590.979	6.8438e-94	1.77576e-89
TCONS_00022722	ADPRH	-3.46251	1.92106	578.272	1.10152e-93	2.8579e-89
TCONS_00001641	SRGAP2	-2.46681	0.888135	736.317	2.20793e-93	5.72804e-89
TCONS_00030724	XLOC_009627	-2.98711	2.43326	356.042	2.23976e-93	5.81038e-89
TCONS_00006415	ARAP1	-1.71978	-1.56905	804.359	3.55798e-93	9.22977e-89
TCONS_00000382	THRAP3	-2.51799	1.53958	469.52	4.34774e-93	1.1278e-88
TCONS_00028056	PSMB8	-1.21216	-2.05997	702.181	7.04501e-93	1.8274e-88
TCONS_00018882_add	AGAP9	-1.38903	1.26851	380.265	8.16067e-93	2.11671e-88
TCONS_00022675	BBX	-3.04804	1.90011	475.853	9.27459e-93	2.40555e-88
TCONS_00020976	SON	-2.36505	0.779969	770.218	1.0064e-92	2.61019e-88
TCONS_00030424	NAT1	2.4027	-1.5941	427.392	1.01326e-92	2.62789e-88
TCONS_00002749	TDRKH	-0.414647	1.43109	344.054	1.7357e-92	4.5012e-88
TCONS_00032915	AKAP17A	-0.698803	-0.935369	585.334	1.90912e-92	4.95054e-88
TCONS_00016396	LMNB2	0.116564	-0.849264	496.035	2.0631e-92	5.34961e-88
TCONS_00016397	LMNB2	-0.116564	0.849264	496.035	2.0631e-92	5.34961e-88
TCONS_00009884	ZFYVE26	-0.59149	-2.27594	561.995	2.11911e-92	5.49444e-88
TCONS_00009885	ZFYVE26	0.59149	2.27594	561.995	2.11911e-92	5.49444e-88
TCONS_00006725	WNK1	-2.618	1.05344	686.747	2.37275e-92	6.15158e-88
TCONS_00033234	IL13RA1	0.566599	-0.486635	671.703	2.38599e-92	6.18568e-88
TCONS_00003227	EPRS	-2.99502	2.46836	354.257	3.10001e-92	8.03646e-88
TCONS_00003228	EPRS	2.99502	-2.46836	354.257	3.10001e-92	8.03646e-88
TCONS_00001703	RPS6KC1	-3.74488	2.0358	620.299	3.91965e-92	1.01605e-87
TCONS_00018616	SP140L	-2.80266	1.93363	409.082	5.47858e-92	1.4201e-87
TCONS_00030480	PPP2R2A	-3.69628	2.06432	598.712	5.5773e-92	1.44564e-87
TCONS_00029943	SAMD9L	-0.976979	0.90225	471.32	5.92739e-92	1.53632e-87
TCONS_00031229	EXT1	-3.50963	2.04781	550.684	7.82505e-92	2.0281e-87
TCONS_00026289	FEM1C	2.65657	-1.40609	543.781	8.75338e-92	2.26861e-87
TCONS_00024106	SH3BP2	-0.548076	-2.32411	559.225	1.03655e-91	2.68632e-87
TCONS_00032334	RFK	3.3634	-2.19836	477.866	1.21142e-91	3.1394e-87
TCONS_00032336	RFK	-3.3634	2.19836	477.866	1.21142e-91	3.1394e-87
TCONS_00006634	AMICA1	-1.54689	1.82908	261.758	1.27851e-91	3.313e-87
TCONS_00006636	AMICA1	1.54689	-1.82908	261.758	1.27851e-91	3.313e-87
TCONS_00024595	KLHL2	1.41462	-1.31791	363.747	1.83876e-91	4.76441e-87
TCONS_00026340	AFF4	-2.95126	1.5288	568.878	2.31557e-91	5.99965e-87
TCONS_00012573	DPH1	-0.501747	-2.55905	609.033	5.20304e-91	1.34805e-86
TCONS_00021765	CHEK2	-1.50785	1.24933	391.639	6.45555e-91	1.6725e-86
TCONS_00024111	HTT	1.18921	1.04301	671.798	6.50631e-91	1.68559e-86
TCONS_00024112	HTT	-1.18921	-1.04301	671.798	6.50631e-91	1.68559e-86
TCONS_00029274	ST7	-1.50595	0.777395	585.792	7.3852e-91	1.91306e-86
TCONS_00002035	NBPF1	-0.174126	0.730719	531.777	8.09367e-91	2.0965e-86
TCONS_00003658	MAP3K8	-0.756954	-1.51346	532.141	8.2538e-91	2.1379e-86
TCONS_00019391	NR4A2	-2.89244	2.06551	391.666	1.72299e-90	4.46271e-86
TCONS_00009177	RNF31	-1.594	-1.52401	757.626	1.73871e-90	4.50326e-86
TCONS_00033575	XLOC_010626	-2.73744	2.70385	295.62	1.91686e-90	4.96447e-86
TCONS_00007291	NEDD1	-2.71676	1.24333	619.056	2.47832e-90	6.41786e-86
TCONS_00021130	XLOC_006587	-3.09068	2.28369	393.838	2.65786e-90	6.88254e-86
TCONS_00112041_add	LINC00158	-3.15449	2.29115	407.957	3.79885e-90	9.83673e-86
TCONS_00006279	STX5	-1.11951	0.873669	487.73	5.90087e-90	1.52791e-85
TCONS_00026339	AFF4	0.693194	-0.975754	426.945	7.28547e-90	1.88621e-85
TCONS_00002662	POLR3C	-2.22407	1.24263	504.398	8.5018e-90	2.20103e-85
TCONS_00002663	POLR3C	2.22407	-1.24263	504.398	8.5018e-90	2.20103e-85
TCONS_00003090	IVNS1ABP	-1.90702	-0.768947	914.83	8.64855e-90	2.23885e-85
TCONS_00030341	ESYT2	0.788932	-1.87735	263.653	8.76109e-90	2.2679e-85
TCONS_00014222	ARHGAP27	-2.6171	0.757427	840.352	9.78009e-90	2.53158e-85
TCONS_00005725	EI24	1.57641	-1.87902	249.334	1.05071e-89	2.71966e-85
TCONS_00030718	EBAG9	-2.57529	2.03085	334.684	1.12419e-89	2.90973e-85
TCONS_00006460	NDUFC2-KCTD14	-4.02545	1.79968	769.205	1.30758e-89	3.38428e-85
TCONS_00006461	NDUFC2-KCTD14	4.02545	-1.79968	769.205	1.30758e-89	3.38428e-85
TCONS_00103769_add	PAX3	-2.64164	2.73815	277.323	1.3579e-89	3.51425e-85
TCONS_00004879	AMPD3	-1.78873	2.19321	219.495	1.55426e-89	4.02226e-85
TCONS_00004880	AMPD3	1.78873	-2.19321	219.495	1.55426e-89	4.02226e-85
TCONS_00013596	ABR	-1.46304	-1.05255	737.823	1.57759e-89	4.08232e-85
TCONS_00022714	POGLUT1	-1.95282	0.967701	566.139	1.68958e-89	4.37197e-85
TCONS_00051485_add	LOC100506499	-2.09789	2.3281	225.042	1.77093e-89	4.58228e-85
TCONS_00030354	ESYT2	-2.61309	1.14467	633.252	1.98613e-89	5.1389e-85
TCONS_00005590	PIWIL4	-3.22444	2.14919	447.452	3.1896e-89	8.25213e-85
TCONS_00030903	MSR1	-0.554229	-1.13202	511.388	3.59757e-89	9.30727e-85
TCONS_00030904	MSR1	0.554229	1.13202	511.388	3.59757e-89	9.30727e-85
TCONS_00019450	STK39	-3.11139	2.36521	388.632	3.71033e-89	9.59826e-85
TCONS_00002285	PABPC4	-0.923138	-1.59821	569.074	3.92279e-89	1.01475e-84
TCONS_00022568	IL17RB	1.06148	1.50867	603.72	4.3696e-89	1.13028e-84
TCONS_00022569	IL17RB	-1.06148	-1.50867	603.72	4.3696e-89	1.13028e-84
TCONS_00019507	SESTD1	-2.82556	2.20596	345.21	9.31688e-89	2.40972e-84
TCONS_00009386	PCNX	0.0581666	-1.11134	419.463	1.1706e-88	3.02751e-84
TCONS_00029841	RFC2	-1.18587	-2.13736	703.148	1.25946e-88	3.25722e-84
TCONS_00032546	PHF19	-3.65334	2.03716	585.9	1.40153e-88	3.6245e-84
TCONS_00022906	MBNL1	-1.26957	-0.696578	760.937	1.83081e-88	4.73428e-84
TCONS_00003654	MAP3K8	-1.71768	-0.720124	869.898	1.97705e-88	5.11226e-84
TCONS_00033659	CD99L2	-3.6156	1.90711	609.997	2.71693e-88	7.0249e-84
TCONS_00033660	CD99L2	3.6156	-1.90711	609.997	2.71693e-88	7.0249e-84
TCONS_00006660	H2AFX	-0.908141	0.978234	426.259	3.37603e-88	8.72838e-84
TCONS_00006661	H2AFX	0.908141	-0.978234	426.259	3.37603e-88	8.72838e-84
TCONS_00022049_add	AGAP9	-0.921412	-1.10587	589.63	4.13214e-88	1.06824e-83
TCONS_00004156	PTPRE	-1.07301	0.655985	586.196	4.38098e-88	1.13253e-83
TCONS_00000640	GBP1P1	-2.56422	2.35694	274.548	4.93675e-88	1.27615e-83
TCONS_00001700	RPS6KC1	-3.28119	1.82005	544.288	5.08178e-88	1.31359e-83
TCONS_00011748	CPNE2	1.39711	-1.63892	275.97	5.09574e-88	1.31715e-83
TCONS_00008809	N4BP2L1	-2.08897	1.05012	550.359	7.4288e-88	1.92012e-83
TCONS_00004607	SLC25A28	0.834995	0.738827	649.269	7.84523e-88	2.02768e-83
TCONS_00004611	SLC25A28	-0.834995	-0.738827	649.269	7.84523e-88	2.02768e-83
TCONS_00000576	RABGGTB	1.21583	-0.981251	445.085	9.21774e-88	2.38223e-83
TCONS_00000579	RABGGTB	-1.21583	0.981251	445.085	9.21774e-88	2.38223e-83
TCONS_00057252_add	PATL2	-0.207735	-1.06693	458.362	1.49103e-87	3.85297e-83
TCONS_00028739	SNX10	0.195072	-1.75629	330.694	1.51133e-87	3.90527e-83
TCONS_00028741	SNX10	-0.195072	1.75629	330.694	1.51133e-87	3.90527e-83
TCONS_00006737	WNT5B	-1.02137	-2.08885	642.533	1.55789e-87	4.02528e-83
TCONS_00008098	SLC41A2	-0.10845	-0.39145	733.954	6.34344e-87	1.63883e-82
TCONS_00008104	SLC41A2	0.10845	0.39145	733.954	6.34344e-87	1.63883e-82
TCONS_00033373	FUNDC2	3.52769	-2.04659	544.905	6.4433e-87	1.6645e-82
TCONS_00033374	FUNDC2	-3.52769	2.04659	544.905	6.4433e-87	1.6645e-82
TCONS_00026693	MGAT1	-0.330492	-0.544528	649.232	6.70041e-87	1.73078e-82
TCONS_00021511	MAFF	-0.124451	2.35662	386.179	9.25081e-87	2.38948e-82
TCONS_00021512	MAFF	0.124451	-2.35662	386.179	9.25081e-87	2.38948e-82
TCONS_00002258	STK40	-2.73702	0.860891	800.509	1.3597e-86	3.51182e-82
TCONS_00029581	SNX8	-1.17599	0.914605	463.495	2.19085e-86	5.65832e-82
TCONS_00021499	SH3BP1	-1.18178	-1.09959	647.864	2.27635e-86	5.87891e-82
TCONS_00002776	DENND4B	-1.67565	-0.693859	859.181	2.50899e-86	6.47921e-82
TCONS_00008707	ARHGEF7	1.45467	-1.12582	411.364	2.91064e-86	7.51615e-82
TCONS_00001989	RERE	-0.89834	-1.064	583.977	3.04673e-86	7.86726e-82
TCONS_00031582	NFX1	-0.17256	0.512564	630.092	3.28735e-86	8.48827e-82
TCONS_00031583	NFX1	0.17256	-0.512564	630.092	3.28735e-86	8.48827e-82
TCONS_00030153	ZNF800	-3.84624	1.86607	683.692	3.91113e-86	1.00982e-81
TCONS_00001607	SRGAP2	0.0198319	-0.648176	561.877	4.17245e-86	1.07724e-81
TCONS_00024134	XLOC_007542	-3.3537	2.12	480.666	4.22678e-86	1.09123e-81
TCONS_00001485	DHX9	-2.57	1.34706	526.585	6.22014e-86	1.60579e-81
TCONS_00029002	FKBP6	-1.68788	1.2963	381.5	6.23992e-86	1.61083e-81
TCONS_00028162	ETV7	-0.7586	2.64137	301.87	9.5225e-86	2.45814e-81
TCONS_00013256	SNX11	-2.97261	2.06923	396.202	9.5542e-86	2.46623e-81
TCONS_00029891	SEMA3D	-2.25744	2.49452	218.244	1.23542e-85	3.18885e-81
TCONS_00008711	ARHGEF7	-3.36646	2.07559	492.038	1.33778e-85	3.45295e-81
TCONS_00023171	CIDEC	1.72389	-0.845634	568.97	1.74709e-85	4.50923e-81
TCONS_00023174	CIDEC	-1.72389	0.845634	568.97	1.74709e-85	4.50923e-81
TCONS_00020618	BCL2L1	0.510055	0.774679	571.261	1.78427e-85	4.60484e-81
TCONS_00029352	AHCYL2	-3.49988	1.66155	649.628	1.83402e-85	4.73304e-81
TCONS_00020050	SRSF6	0.656716	-1.33424	321.16	1.85369e-85	4.78364e-81
TCONS_00024690	FBXL5	2.79477	-1.88316	400.926	1.91407e-85	4.93926e-81
TCONS_00024692	FBXL5	-2.79477	1.88316	400.926	1.91407e-85	4.93926e-81
TCONS_00027826	FAM65B	-2.83471	1.87299	412.158	2.26005e-85	5.83159e-81
TCONS_00025546	PAPD4	-2.12372	0.710175	729.427	2.52066e-85	6.50381e-81
TCONS_00031522	PDCD1LG2	-2.44617	1.87167	334.887	2.58906e-85	6.68003e-81
TCONS_00002159	SRSF4	-2.80147	1.17255	655.053	2.7222e-85	7.02328e-81
TCONS_00002161	SRSF4	2.80147	-1.17255	655.053	2.7222e-85	7.02328e-81
TCONS_00030617	C8orf44-SGK3	-0.412912	-1.58846	437.105	3.16662e-85	8.16892e-81
TCONS_00004353	EPC1	2.71384	-1.58248	472.215	4.01655e-85	1.03611e-80
TCONS_00004354	EPC1	-2.71384	1.58248	472.215	4.01655e-85	1.03611e-80
TCONS_00025705	TNFAIP8	-0.0656323	0.832094	481.226	4.10211e-85	1.0581e-80
TCONS_00006994	SP1	-2.70249	1.57344	472.606	4.16297e-85	1.07376e-80
TCONS_00014985	XLOC_004831	-2.82806	2.40288	317.498	5.18121e-85	1.33634e-80
TCONS_00018581	SGPP2	-1.80628	1.76428	270.32	5.76625e-85	1.48717e-80
TCONS_00003120	DENND1B	-2.48601	1.11112	601.986	6.18762e-85	1.59579e-80
TCONS_00002956	CD48	3.35694	-1.73009	584.193	6.52885e-85	1.68366e-80
TCONS_00002961	CD48	-3.35694	1.73009	584.193	6.52885e-85	1.68366e-80
TCONS_00009407	RBM25	-2.52813	1.14351	597.5	6.74728e-85	1.73985e-80
TCONS_00030553	AGPAT6	2.79367	-1.51963	511.725	7.9734e-85	2.05594e-80
TCONS_00030554	AGPAT6	-2.79367	1.51963	511.725	7.9734e-85	2.05594e-80
TCONS_00001438	TOR1AIP1	-3.13875	1.67975	542.517	8.45442e-85	2.1798e-80
TCONS_00001744_add	AGO3	0.41202	-1.11862	375.724	8.82226e-85	2.27456e-80
TCONS_00007356	KIAA1033	-3.21007	1.2065	750.422	9.8995e-85	2.55219e-80
TCONS_00007358	KIAA1033	3.21007	-1.2065	750.422	9.8995e-85	2.55219e-80
TCONS_00018432	CASP8	-0.828367	-1.77733	541.42	1.1252e-84	2.90064e-80
TCONS_00025171	DDX60L	-1.45327	-0.879816	746.717	1.33007e-84	3.42867e-80
TCONS_00028953	CCT6P1	-2.42071	1.72683	364.354	2.78388e-84	7.17572e-80
TCONS_00014384	BRIP1	-2.38109	1.3334	483.37	4.06676e-84	1.04817e-79
TCONS_00024620	FRG1	1.70703	-1.22417	400.711	8.91647e-84	2.29804e-79
TCONS_00024621	FRG1	-1.70703	1.22417	400.711	8.91647e-84	2.29804e-79
TCONS_00030037	SRPK2	1.50284	0.657727	816.154	1.0664e-83	2.74823e-79
TCONS_00030044	SRPK2	-1.50284	-0.657727	816.154	1.0664e-83	2.74823e-79
TCONS_00030789	GSDMD	-1.43902	-0.817584	753.454	1.09092e-83	2.8112e-79
TCONS_00027375	FAM135A	-1.54324	1.73207	251.993	1.10008e-83	2.83468e-79
TCONS_00017777	HK2	3.09613	-1.27292	684.632	1.12906e-83	2.90924e-79
TCONS_00017778	HK2	-3.09613	1.27292	684.632	1.12906e-83	2.90924e-79
TCONS_00030885	MFHAS1	-0.778829	1.0749	375.599	1.17305e-83	3.02236e-79
TCONS_00030886	MFHAS1	0.778829	-1.0749	375.599	1.17305e-83	3.02236e-79
TCONS_00014936	LPIN2	-3.47787	1.65033	641.553	1.24526e-83	3.20816e-79
TCONS_00018610	SP140L	-0.817751	-2.43049	673.152	1.26027e-83	3.24671e-79
TCONS_00010670	MTMR10	-1.97252	1.45734	363.868	1.34454e-83	3.46366e-79
TCONS_00010671	MTMR10	1.97252	-1.45734	363.868	1.34454e-83	3.46366e-79
TCONS_00018002	CBWD2	0.472869	1.27166	460.467	1.35196e-83	3.48252e-79
TCONS_00018003	CBWD2	-0.472869	-1.27166	460.467	1.35196e-83	3.48252e-79
TCONS_00021128	XLOC_006587	-3.17087	2.22685	413.964	1.6804e-83	4.32821e-79
TCONS_00132866_add	LOC100506746	0.0975665	-1.01252	419.926	2.14975e-83	5.5369e-79
TCONS_00019381	PRPF40A	2.1094	0.43102	1086.56	2.22961e-83	5.74237e-79
TCONS_00019382	PRPF40A	-2.1094	-0.43102	1086.56	2.22961e-83	5.74237e-79
TCONS_00010882	VPS13C	-1.21893	0.9974	423.977	2.38788e-83	6.14951e-79
TCONS_00010883	VPS13C	1.21893	-0.9974	423.977	2.38788e-83	6.14951e-79
TCONS_00013686	ZZEF1	-2.51065	1.85129	345.131	2.74738e-83	7.07451e-79
TCONS_00013687	ZZEF1	2.51065	-1.85129	345.131	2.74738e-83	7.07451e-79
TCONS_00021670	SELO	-2.1562	1.29538	448.824	2.76609e-83	7.12213e-79
TCONS_00030928	TNFRSF10B	-1.65484	-2.09717	837.538	4.9793e-83	1.28202e-78
TCONS_00013349	TLK2	-1.57118	-0.677002	825.198	5.02266e-83	1.29313e-78
TCONS_00028992	FKBP6	-0.928481	1.21347	337.251	5.17382e-83	1.332e-78
TCONS_00000649	GBP1P1	-3.95027	1.74538	745.26	7.3083e-83	1.88138e-78
TCONS_00003370	ZNF124	0.42642	0.927897	505.594	1.00648e-82	2.59087e-78
TCONS_00003372	ZNF124	-0.42642	-0.927897	505.594	1.00648e-82	2.59087e-78
TCONS_00000433	SMAP2	-1.09158	0.713002	537.498	1.20367e-82	3.09812e-78
TCONS_00008511	USPL1	-1.87085	-0.928738	847.565	1.48817e-82	3.83025e-78
TCONS_00016823	HNRNPL	-2.62778	1.05272	656.398	1.53693e-82	3.95561e-78
TCONS_00016824	HNRNPL	2.62778	-1.05272	656.398	1.53693e-82	3.95561e-78
TCONS_00026700	MGAT1	-3.19786	1.0837	797.524	2.7551e-82	7.09024e-78
TCONS_00004943	PRRG4	1.31784	-1.39032	306.07	2.93219e-82	7.5457e-78
TCONS_00031793	NR4A3	-0.0427371	-0.991254	435.672	3.05262e-82	7.85531e-78
TCONS_00004415	PARG	-1.37783	-0.523246	835.617	3.96057e-82	1.01914e-77
TCONS_00004416	PARG	1.37783	0.523246	835.617	3.96057e-82	1.01914e-77
TCONS_00007147	RBMS2	-1.392	-0.602424	803.117	4.9535e-82	1.27449e-77
TCONS_00032308	AK057188	-1.85917	0.844452	582.91	5.75312e-82	1.48011e-77
TCONS_00022337	GOLGA4	-1.63021	1.95556	216.061	5.94298e-82	1.52889e-77
TCONS_00026498	TNIP1	0.0170197	1.27579	378.41	6.24609e-82	1.60681e-77
TCONS_00001100	ADAM15	-1.54899	-0.967724	747.598	7.81071e-82	2.00923e-77
TCONS_00024722	ARAP2	0.0248916	-0.703373	521.679	9.13659e-82	2.35021e-77
TCONS_00030349	ESYT2	-3.46854	1.84706	568.471	1.0665e-81	2.74326e-77
TCONS_00024727	ARAP2	-3.01343	1.07075	748.868	1.08429e-81	2.7889e-77
TCONS_00030030	DNAJC2	-2.15519	1.24658	461.329	1.10132e-81	2.8326e-77
TCONS_00009996	SERPINA1	-1.82095	1.34904	367.753	1.52415e-81	3.91997e-77
TCONS_00009997	SERPINA1	1.82095	-1.34904	367.753	1.52415e-81	3.91997e-77
TCONS_00012450	KARS	-1.60394	-0.574377	866.694	1.93803e-81	4.98403e-77
TCONS_00012451	KARS	1.60394	0.574377	866.694	1.93803e-81	4.98403e-77
TCONS_00030964	WHSC1L1	-0.294038	-0.713182	547.886	2.31878e-81	5.96275e-77
TCONS_00018094	CCNT2	-0.136866	-2.10363	398.071	2.68264e-81	6.89815e-77
TCONS_00022713	POGLUT1	-2.55138	1.34554	506.555	3.43794e-81	8.83998e-77
TCONS_00002426	PTGER3	-2.17984	-1.49879	911.142	3.45448e-81	8.88216e-77
TCONS_00023084	EIF4A2	-1.29421	0.590749	630.987	4.66666e-81	1.19985e-76
TCONS_00024451	C4orf32	2.39545	-1.20644	525.9	4.93706e-81	1.26932e-76
TCONS_00024452	C4orf32	-2.39545	1.20644	525.9	4.93706e-81	1.26932e-76
TCONS_00019563	SF3B1	-2.80195	1.07368	686.361	6.42948e-81	1.65289e-76
TCONS_00004420	SGMS1	-1.90555	1.80906	257.458	7.82711e-81	2.01211e-76
TCONS_00025421	PARP8	0.410487	-1.30417	324.45	9.71281e-81	2.49678e-76
TCONS_00011710	CYLD	0.137542	-1.0502	397.738	1.0742e-80	2.76123e-76
TCONS_00018582	SGPP2	1.2378	-1.88095	213.713	1.29612e-80	3.33154e-76
TCONS_00174938_add	TRPM3	-3.15051	2.17403	412.608	1.33221e-80	3.42405e-76
TCONS_00051482_add	LOC100506499	-0.290951	-1.10621	439.83	1.64583e-80	4.22995e-76
TCONS_00005874	IGF2	-3.42182	2.00834	511.665	1.72136e-80	4.4239e-76
TCONS_00029091	ANKIB1	1.01474	1.38738	566.25	2.04969e-80	5.26749e-76
TCONS_00029092	ANKIB1	-1.01474	-1.38738	566.25	2.04969e-80	5.26749e-76
TCONS_00029278	ST7	0.757486	-0.960931	400.316	2.17256e-80	5.58284e-76
TCONS_00000154	PLEKHM2	-0.794339	0.478235	650.979	2.77719e-80	7.13626e-76
TCONS_00000158	PLEKHM2	0.794339	-0.478235	650.979	2.77719e-80	7.13626e-76
TCONS_00008268	RSRC2	-3.52509	1.96086	550.522	3.04382e-80	7.8208e-76
TCONS_00004204	IL15RA	-2.45998	1.76874	346.75	3.6699e-80	9.42908e-76
TCONS_00025062	DDX60	-3.15411	1.7596	505.937	3.69191e-80	9.48525e-76
TCONS_00031133	NBN	-3.58324	1.6768	651.418	3.70132e-80	9.50905e-76
TCONS_00009585	BC017818	-1.34763	-1.10661	669.445	4.176e-80	1.07281e-75
TCONS_00009586	BC017818	1.34763	1.10661	669.445	4.176e-80	1.07281e-75
TCONS_00008807	N4BP2L1	0.90385	-0.672789	532.932	4.85615e-80	1.24745e-75
TCONS_00017894	MAP4K4	-2.98199	1.65402	495.367	5.93256e-80	1.5239e-75
TCONS_00013460	SNHG16	-0.124868	-1.35427	378.057	8.448e-80	2.16995e-75
TCONS_00013461	SNHG16	0.124868	1.35427	378.057	8.448e-80	2.16995e-75
TCONS_00020781	ZNFX1	2.01599	0.443165	1039.69	8.92148e-80	2.29139e-75
TCONS_00020783	ZNFX1	-2.01599	-0.443165	1039.69	8.92148e-80	2.29139e-75
TCONS_00006853	PTPRO	0.186755	0.264392	844.233	1.00112e-79	2.57108e-75
TCONS_00009770	SNX6	0.369487	-0.303185	788.306	1.04165e-79	2.67505e-75
TCONS_00009772	SNX6	-0.369487	0.303185	788.306	1.04165e-79	2.67505e-75
TCONS_00014918	NFATC1	-0.865132	0.863957	438.032	1.27609e-79	3.27687e-75
TCONS_00007747	ABCD2	0.980673	-1.99164	212.953	1.55188e-79	3.98491e-75
TCONS_00007748	ABCD2	-0.980673	1.99164	212.953	1.55188e-79	3.98491e-75
TCONS_00027788	ATXN1	-1.43436	0.938743	457.359	3.61659e-79	9.28596e-75
TCONS_00002813	ADAR	-1.84229	-1.23726	798.059	3.70201e-79	9.50491e-75
TCONS_00021666	SELO	-1.37893	-0.733726	744.139	4.25034e-79	1.09115e-74
TCONS_00000435	SMAP2	-2.72849	1.02589	683.434	5.3306e-79	1.36842e-74
TCONS_00001715	HLX	2.12657	-1.08777	510.611	5.76824e-79	1.48071e-74
TCONS_00001717	HLX	-2.12657	1.08777	510.611	5.76824e-79	1.48071e-74
TCONS_00029784	GRB10	-3.20028	1.64373	551.787	7.05791e-79	1.81162e-74
TCONS_00024515	ABCE1	-1.45352	-0.752586	756.951	7.67512e-79	1.96974e-74
TCONS_00024517	ABCE1	1.45352	0.752586	756.951	7.67512e-79	1.96974e-74
TCONS_00007241	MDM2	-0.932881	1.10302	353.644	7.96513e-79	2.04401e-74
TCONS_00013595	ABR	-1.31368	-1.49201	641.964	8.8083e-79	2.2603e-74
TCONS_00018093	CCNT2	-1.62102	1.17556	387.923	1.09131e-78	2.80018e-74
TCONS_00000533	XLOC_000182	0.560687	-1.44305	284.974	1.3007e-78	3.33734e-74
TCONS_00023449	RASSF1	-2.6405	1.20277	577.065	1.34575e-78	3.45279e-74
TCONS_00073623_add	NLRP1	-0.627556	-0.864855	541.196	1.6237e-78	4.16561e-74
TCONS_00026154	SREK1IP1	-1.26725	-0.685449	729.301	2.08607e-78	5.35139e-74
TCONS_00026156	SREK1IP1	1.26725	0.685449	729.301	2.08607e-78	5.35139e-74
TCONS_00023932	RPL22L1	-1.28092	1.32565	306.326	2.57344e-78	6.60112e-74
TCONS_00022415	CCRL2	-3.19299	1.69252	531.376	3.16601e-78	8.12082e-74
TCONS_00002916	ARHGEF11	-3.00538	0.846197	855.43	4.43173e-78	1.13665e-73
TCONS_00033210	NXT2	-2.72284	2.08149	321.649	4.45439e-78	1.14242e-73
TCONS_00010075	GPR132	-2.88944	1.80111	421.471	6.47217e-78	1.65979e-73
TCONS_00031258	ENPP2	-0.535967	-1.26148	454.694	7.56602e-78	1.94023e-73
TCONS_00018697	PPP1R7	-0.878666	-0.4591	749.52	7.64772e-78	1.9611e-73
TCONS_00002748	TDRKH	-0.311491	-1.74539	396.467	7.93616e-78	2.03499e-73
TCONS_00018886_add	AGAP9	-1.18935	-0.979818	637.426	8.19069e-78	2.10017e-73
TCONS_00057279_add	PATL2	-2.59868	1.01474	650.498	9.61746e-78	2.46592e-73
TCONS_00024669	AFAP1	-2.17119	1.76672	290.124	1.11128e-77	2.84921e-73
TCONS_00014588	CANT1	0.59641	-1.00117	376.37	1.29648e-77	3.32393e-73
TCONS_00029354	AHCYL2	-2.16707	1.43023	383.825	1.50882e-77	3.86816e-73
TCONS_00033401	PRKX	-1.19242	0.70103	536.507	2.34798e-77	6.01927e-73
TCONS_00033402	PRKX	1.19242	-0.70103	536.507	2.34798e-77	6.01927e-73
TCONS_00012341	CSNK2A2	0.210259	0.441164	668.756	2.70635e-77	6.93745e-73
TCONS_00012342	CSNK2A2	-0.210259	-0.441164	668.756	2.70635e-77	6.93745e-73
TCONS_00025835	IK	-0.67545	1.04621	360.656	3.56199e-77	9.13009e-73
TCONS_00025836	IK	0.67545	-1.04621	360.656	3.56199e-77	9.13009e-73
TCONS_00004345	ZNF438	-3.42553	1.37504	712.057	3.80464e-77	9.7513e-73
TCONS_00007866	CALCOCO1	0.913442	0.762377	620.409	4.81036e-77	1.23285e-72
TCONS_00013568	FOXK2	0.0843393	-1.01247	398.783	4.88074e-77	1.25084e-72
TCONS_00013569	FOXK2	-0.0843393	1.01247	398.783	4.88074e-77	1.25084e-72
TCONS_00010504	WHAMM	-0.000994872	-1.29235	356.734	6.67297e-77	1.70988e-72
TCONS_00010505	WHAMM	0.000994872	1.29235	356.734	6.67297e-77	1.70988e-72
TCONS_00008160	HVCN1	-2.79395	1.82076	391.097	6.7764e-77	1.73625e-72
TCONS_00022805	CDV3	-2.19657	0.67743	738.08	7.51078e-77	1.92434e-72
TCONS_00020895	USP25	-3.17042	1.18113	723.122	7.88343e-77	2.01973e-72
TCONS_00006840	KIAA1467	2.73102	-2.36281	300.788	8.57745e-77	2.19746e-72
TCONS_00006841	KIAA1467	-2.73102	2.36281	300.788	8.57745e-77	2.19746e-72
TCONS_00028381	REV3L	-0.79855	-2.08088	563.632	8.80597e-77	2.25574e-72
TCONS_00015845	CLASRP	-1.51733	-1.05632	709.271	1.14638e-76	2.93646e-72
TCONS_00006284	WDR74	-0.177535	-1.58179	363.655	1.20824e-76	3.09479e-72
TCONS_00006285	WDR74	0.177535	1.58179	363.655	1.20824e-76	3.09479e-72
TCONS_00028233	PLA2G7	-1.73461	-0.390845	984.573	1.73906e-76	4.45408e-72
TCONS_00003972	IFIT3	-0.281272	-1.09053	426.832	1.80641e-76	4.62639e-72
TCONS_00006992	SP1	1.82009	-0.976648	491.22	1.91599e-76	4.90685e-72
TCONS_00017800	VAMP5	-0.955958	-1.51122	538.571	1.93486e-76	4.95498e-72
TCONS_00019170	ST3GAL5	1.53834	-0.887246	485.146	2.43015e-76	6.22313e-72
TCONS_00019176	ST3GAL5	-1.53834	0.887246	485.146	2.43015e-76	6.22313e-72
TCONS_00032747	CARD9	-1.59451	-0.973395	740.266	2.52248e-76	6.45906e-72
TCONS_00013032	CCL4	-2.58454	1.62742	399.237	2.5748e-76	6.59279e-72
TCONS_00002854	FAM189B	1.84431	-0.660513	666.435	3.47668e-76	8.90168e-72
TCONS_00002855	FAM189B	-1.84431	0.660513	666.435	3.47668e-76	8.90168e-72
TCONS_00018790	PUM2	-1.75665	-1.93234	825.079	4.29965e-76	1.10075e-71
TCONS_00006506	TAF1D	0.475236	0.590829	604.661	7.57001e-76	1.93792e-71
TCONS_00006507	TAF1D	-0.475236	-0.590829	604.661	7.57001e-76	1.93792e-71
TCONS_00008931	TBC1D4	-0.525879	2.00907	250.13	8.89156e-76	2.27606e-71
TCONS_00018429	CASP8	-1.86067	1.16393	417.824	9.27394e-76	2.37385e-71
TCONS_00004702	MCMBP	-1.76466	-1.77828	796.298	9.75149e-76	2.49599e-71
TCONS_00005078	TMX2-CTNND1	-0.939905	-0.551014	701.981	1.29369e-75	3.31107e-71
TCONS_00022748	PARP14	0.832762	-0.742282	475.724	1.54103e-75	3.94397e-71
TCONS_00007286	C12orf63	-2.97575	2.1615	366.826	1.59158e-75	4.07302e-71
TCONS_00016857	PAF1	-1.45016	-1.02655	690.302	1.80548e-75	4.62022e-71
TCONS_00016858	PAF1	1.45016	1.02655	690.302	1.80548e-75	4.62022e-71
TCONS_00022729	PLA1A	2.22534	-1.95798	250.142	2.08507e-75	5.33528e-71
TCONS_00022730	PLA1A	-2.22534	1.95798	250.142	2.08507e-75	5.33528e-71
TCONS_00005034	MADD	-1.04897	1.53072	243.593	2.34607e-75	6.00241e-71
TCONS_00011549	TMEM219	0.395893	-0.610145	530.183	2.40701e-75	6.1581e-71
TCONS_00006857	PTPRO	-0.613935	-0.462544	694.18	2.43884e-75	6.23929e-71
TCONS_00006816	CLEC2D	-2.14055	1.74512	282.636	2.48328e-75	6.35274e-71
TCONS_00032286	LOC440896	-2.74192	1.6464	424.665	2.73183e-75	6.98831e-71
TCONS_00028954	CCT6P1	-2.72681	1.66161	416.417	2.90094e-75	7.4206e-71
TCONS_00027107	CFB	-2.75186	2.25253	306.477	2.9963e-75	7.66424e-71
TCONS_00016340	TMEM259	0.749863	0.643055	623.137	3.96815e-75	1.01497e-70
TCONS_00023423	UBA7	-1.56735	-0.66612	799.629	4.12018e-75	1.05382e-70
TCONS_00009553	EVL	-2.10818	-0.71127	938.373	4.25497e-75	1.08821e-70
TCONS_00018188	GCA	-1.13954	-1.53669	584.208	4.75237e-75	1.21532e-70
TCONS_00014532	EXOC7	1.07273	-0.844197	444.046	4.93495e-75	1.26197e-70
TCONS_00014533	EXOC7	-1.07273	0.844197	444.046	4.93495e-75	1.26197e-70
TCONS_00001382	BLZF1	-0.488157	-0.872099	502.187	5.64759e-75	1.44409e-70
TCONS_00006618	TMPRSS13	-3.61123	1.56474	683.183	6.5793e-75	1.68226e-70
TCONS_00022723	ADPRH	0.82915	-0.979577	375.087	1.06473e-74	2.72231e-70
TCONS_00004403	ARHGAP22	-1.43097	1.86081	197.231	1.14073e-74	2.9165e-70
TCONS_00033563	MORF4L2	-2.03928	0.857529	586.773	1.22479e-74	3.13129e-70
TCONS_00018242	SSFA2	-2.59781	1.29694	512.065	2.39351e-74	6.11828e-70
TCONS_00022535	STAB1	-1.17468	-0.677449	695.427	2.4282e-74	6.20671e-70
TCONS_00028226	NFKBIE	-0.189715	-1.37477	367.754	3.48802e-74	8.91539e-70
TCONS_00028229	NFKBIE	0.189715	1.37477	367.754	3.48802e-74	8.91539e-70
TCONS_00013957	SSH2	-0.446581	-1.63394	411.512	4.01303e-74	1.02565e-69
TCONS_00011867	SF3B3	2.36459	-1.4135	415.436	4.17081e-74	1.06585e-69
TCONS_00011868	SF3B3	-2.36459	1.4135	415.436	4.17081e-74	1.06585e-69
TCONS_00082950_add	ZNF69	-0.601103	-1.67218	448.979	4.19564e-74	1.07211e-69
TCONS_00025363	SLC1A3	-0.792345	-2.3706	663.962	4.33936e-74	1.10879e-69
TCONS_00027697	QKI	-1.27758	0.337228	821.697	4.35011e-74	1.1115e-69
TCONS_00027703	QKI	1.27758	-0.337228	821.697	4.35011e-74	1.1115e-69
TCONS_00000508	OSBPL9	0.242235	-1.02009	372.713	4.67958e-74	1.19559e-69
TCONS_00027918	DDX39B	-1.62841	-1.01796	735.389	5.7942e-74	1.4803e-69
TCONS_00023824	ISY1-RAB43	-1.0087	-0.500334	735.79	6.58792e-74	1.68302e-69
TCONS_00027556	TNFAIP3	-1.84616	1.45588	311.432	7.10469e-74	1.81496e-69
TCONS_00004444	JMJD1C	-1.07252	1.12372	335.316	7.31124e-74	1.86766e-69
TCONS_00006265	HNRNPUL2-BSCL2	0.478952	1.29428	426.484	8.32486e-74	2.12634e-69
TCONS_00006266	HNRNPUL2-BSCL2	-0.478952	-1.29428	426.484	8.32486e-74	2.12634e-69
TCONS_00001823	ACTN2	-3.38168	1.88593	514.57	8.37427e-74	2.13879e-69
TCONS_00017013	PLA2G4C	-3.09783	1.45397	575.82	8.90124e-74	2.2732e-69
TCONS_00000805	SRGAP2B	-0.475555	-0.76547	527.166	9.04481e-74	2.30977e-69
TCONS_00012481	ZDHHC7	-0.489947	0.759917	450.947	9.60658e-74	2.45314e-69
TCONS_00012483	ZDHHC7	0.489947	-0.759917	450.947	9.60658e-74	2.45314e-69
TCONS_00019080	TIA1	-1.45214	-0.593834	791.663	9.98769e-74	2.55026e-69
TCONS_00032545	PHF19	0.893274	-1.11486	329.568	1.5623e-73	3.98903e-69
TCONS_00022413	CCRL2	1.46887	-1.16868	352.483	1.7372e-73	4.43525e-69
TCONS_00024492	CCRN4L	-1.53797	-1.87776	740.273	2.26178e-73	5.77432e-69
TCONS_00018428	CASP8	-2.10375	1.23016	427.448	2.41301e-73	6.16018e-69
TCONS_00028283	HMGN3	-3.1949	1.3105	658.918	3.48603e-73	8.89913e-69
TCONS_00027594	UTRN	-1.72536	-1.84594	792.584	5.07231e-73	1.29481e-68
TCONS_00055002_add	LDHAL6B	-2.31059	2.23934	218.762	5.29073e-73	1.35051e-68
TCONS_00021843	APOL3	0.294406	0.759465	500.287	6.26028e-73	1.59794e-68
TCONS_00007829	CSRNP2	-1.2399	-1.49142	603.344	1.0117e-72	2.58207e-68
TCONS_00031275	ZHX1-C8ORF76	0.291111	-0.503979	584.969	1.22902e-72	3.13658e-68
TCONS_00031277	ZHX1-C8ORF76	-0.291111	0.503979	584.969	1.22902e-72	3.13658e-68
TCONS_00000569	SRSF11	-2.95745	1.10841	681.751	1.46832e-72	3.747e-68
TCONS_00004387	HNRNPF	0.144789	0.599656	549.89	1.51109e-72	3.85599e-68
TCONS_00004391	HNRNPF	-0.144789	-0.599656	549.89	1.51109e-72	3.85599e-68
TCONS_00018431	CASP8	-1.23769	-1.06527	618.769	1.70304e-72	4.34547e-68
TCONS_00020829	ZBP1	-3.47754	1.66843	599.692	1.82596e-72	4.65893e-68
TCONS_00019833	ATRN	-1.45105	-1.81155	698.673	2.06812e-72	5.27661e-68
TCONS_00029585	SNX8	-0.0539825	-0.45671	628.064	2.22881e-72	5.68635e-68
TCONS_00002817	ADAR	0.626652	-0.627486	513.66	2.33009e-72	5.94453e-68
TCONS_00022332	GOLGA4	-1.14992	-1.11282	590.017	3.29635e-72	8.40931e-68
TCONS_00030565	SMIM19	-0.361592	-0.961726	449.663	3.40207e-72	8.67833e-68
TCONS_00012497	XLOC_004047	-4.14934	1.47674	874.448	3.46921e-72	8.84927e-68
TCONS_00140169_add	LOC553103	-1.48166	-1.51298	671.939	4.05796e-72	1.03506e-67
TCONS_00030059	NAMPT	0.341846	-0.40497	658.339	4.06611e-72	1.03706e-67
TCONS_00030060	NAMPT	-0.341846	0.40497	658.339	4.06611e-72	1.03706e-67
TCONS_00014101	DNAJC7	-1.76424	-0.397896	971.185	4.08162e-72	1.04094e-67
TCONS_00018235	MIR548N	-1.33181	0.596388	599.337	6.15578e-72	1.56979e-67
TCONS_00010961	ADPGK	2.66451	-0.942745	682.922	7.28951e-72	1.85882e-67
TCONS_00010964	ADPGK	-2.66451	0.942745	682.922	7.28951e-72	1.85882e-67
TCONS_00025716	SNX24	0.0444962	0.852155	436.703	8.32342e-72	2.12231e-67
TCONS_00025717	SNX24	-0.0444962	-0.852155	436.703	8.32342e-72	2.12231e-67
TCONS_00026112	AK056817	-1.6619	-0.744052	789.13	9.01504e-72	2.29847e-67
TCONS_00018794	PUM2	-0.51086	-1.61841	418.613	9.11104e-72	2.32286e-67
TCONS_00020862	HELZ2	-2.84696	1.55744	466.408	9.13572e-72	2.32906e-67
TCONS_00000666	RPL5	1.7789	-0.574008	695.743	9.86589e-72	2.51511e-67
TCONS_00000667	RPL5	-1.7789	0.574008	695.743	9.86589e-72	2.51511e-67
TCONS_00017009	PLA2G4C	-1.36821	1.23139	315.536	9.91532e-72	2.52751e-67
TCONS_00031521	PDCD1LG2	1.02711	-1.31187	274.235	1.04199e-71	2.65604e-67
TCONS_00009144	BCL2L2-PABPN1	-0.737935	-0.610865	621.086	1.58088e-71	4.02952e-67
TCONS_00018106	HNMT	0.931587	-0.589739	552.823	1.68075e-71	4.2839e-67
TCONS_00032364	ZCCHC6	0.141283	-0.721441	468.92	1.6889e-71	4.3045e-67
TCONS_00022893	TSC22D2	-1.86323	0.887573	523.083	1.90058e-71	4.84381e-67
TCONS_00016543	DNMT1	-1.87582	-1.52746	790.283	2.68691e-71	6.8476e-67
TCONS_00005626	ZC3H12C	-0.658494	1.80739	219.966	2.90676e-71	7.40758e-67
TCONS_00005628	ZC3H12C	0.658494	-1.80739	219.966	2.90676e-71	7.40758e-67
TCONS_00010266	DUOX1	-1.53163	-1.2432	680.641	3.02582e-71	7.71038e-67
TCONS_00023217	ANKRD28	-1.54194	1.87297	187.404	3.06558e-71	7.81142e-67
TCONS_00028889	CCM2	-3.39565	1.75305	546.331	4.20623e-71	1.07175e-66
TCONS_00019842	CDC25B	-1.2896	-1.32653	610.248	4.24128e-71	1.08064e-66
TCONS_00025374	WDR70	2.50811	-1.63248	362.858	6.24267e-71	1.59044e-66
TCONS_00025375	WDR70	-2.50811	1.63248	362.858	6.24267e-71	1.59044e-66
TCONS_00016520	ZNF562	-1.18554	0.746126	486.688	9.09134e-71	2.31584e-66
TCONS_00016521	ZNF562	1.18554	-0.746126	486.688	9.09134e-71	2.31584e-66
TCONS_00024886	HNRPDL	-1.67551	-0.704075	800.45	9.21057e-71	2.34602e-66
TCONS_00023360	SHISA5	-1.65109	1.10414	388.949	9.50758e-71	2.42158e-66
TCONS_00014969	PTPN2	-2.00942	0.423037	871.699	9.91231e-71	2.52457e-66
TCONS_00012576	DPH1	-1.74853	1.44222	290.456	1.30199e-70	3.31591e-66
TCONS_00028864	ZMIZ2	-0.453564	-0.539195	608.41	1.37037e-70	3.48991e-66
TCONS_00023885	PLSCR1	-3.11771	1.0238	761.889	1.55977e-70	3.97211e-66
TCONS_00023888	PLSCR1	3.11771	-1.0238	761.889	1.55977e-70	3.97211e-66
TCONS_00010738	PLCB2	-1.49867	-1.16422	672.3	2.33821e-70	5.95377e-66
TCONS_00004120	SEC23IP	-1.47288	-1.86505	714.02	2.36066e-70	6.01071e-66
TCONS_00011983	LUC7L	-0.525811	-1.14308	439.111	2.96592e-70	7.55153e-66
TCONS_00029374	TMEM140	-2.53825	2.20425	260.098	4.01747e-70	1.02281e-65
TCONS_00021212	U2AF1	-2.74445	1.04115	647.169	4.2693e-70	1.08688e-65
TCONS_00028221	MRPL14	-2.77128	1.36786	510.609	4.61432e-70	1.17462e-65
TCONS_00028222	MRPL14	2.77128	-1.36786	510.609	4.61432e-70	1.17462e-65
TCONS_00005264	MALAT1	-2.4892	2.33243	252.686	5.84838e-70	1.48865e-65
TCONS_00027171	BRD2	-1.15219	0.337635	785.196	6.64573e-70	1.69154e-65
TCONS_00103567_add	DIRC3	-2.46102	2.40275	254.485	7.53407e-70	1.91757e-65
TCONS_00033209	NXT2	-0.32749	-1.83842	386.101	8.53449e-70	2.17211e-65
TCONS_00029976	ZNF394	1.41605	0.734148	719.179	8.93362e-70	2.27361e-65
TCONS_00029977	ZNF394	-1.41605	-0.734148	719.179	8.93362e-70	2.27361e-65
TCONS_00004169	LARP4B	-3.66375	1.75455	620.263	9.32528e-70	2.3731e-65
TCONS_00027003	HLA-L	0.0694208	-1.50955	301.589	9.49841e-70	2.41706e-65
TCONS_00015791	ARHGEF1	-2.05081	-0.965561	850.366	1.05936e-69	2.69564e-65
TCONS_00033274	STAG2	-0.783588	0.636883	505.3	1.62274e-69	4.12905e-65
TCONS_00006551	CASP1	-0.574256	-0.42512	691.401	2.15204e-69	5.47566e-65
TCONS_00018020	DBI	-0.505255	-0.396006	704.006	2.33304e-69	5.93596e-65
TCONS_00018021	DBI	0.505255	0.396006	704.006	2.33304e-69	5.93596e-65
TCONS_00000161	SPEN	-2.1191	1.40094	354.393	2.66032e-69	6.76812e-65
TCONS_00031885	TLR4	-0.80032	-1.51248	477.277	2.79165e-69	7.10196e-65
TCONS_00001436	SOAT1	0.0941669	0.223338	857.355	3.37834e-69	8.59381e-65
TCONS_00067506_add	TAF1C	0.166781	-1.6965	278.729	4.33361e-69	1.10234e-64
TCONS_00017866	MAP4K4	-0.512192	-1.09528	438.876	4.61249e-69	1.17323e-64
TCONS_00013033	CCL4	-1.41819	2.23525	156.501	5.524e-69	1.40486e-64
TCONS_00103753_add	PAX3	-3.2336	1.90952	461.07	6.37332e-69	1.6208e-64
TCONS_00004102	SHOC2	2.22386	-1.20288	445.194	7.30984e-69	1.85882e-64
TCONS_00004103	SHOC2	-2.22386	1.20288	445.194	7.30984e-69	1.85882e-64
TCONS_00011354	NOMO1	0.36334	-2.15391	274.79	1.03396e-68	2.62895e-64
TCONS_00004425	SGMS1	-1.99226	-1.24408	808.057	1.95273e-68	4.96423e-64
TCONS_00076286_add	TEX14	1.90668	-1.74314	227.691	2.29567e-68	5.83559e-64
TCONS_00076313_add	TEX14	-1.90668	1.74314	227.691	2.29567e-68	5.83559e-64
TCONS_00004121	SEC23IP	-1.48295	-1.38011	655.69	2.72557e-68	6.92786e-64
TCONS_00014442	LOC146880	-0.00139109	-0.561665	542.76	2.72809e-68	6.934e-64
TCONS_00010594	LOC100507217	-0.193167	0.817307	415.741	3.37294e-68	8.57199e-64
TCONS_00010597	LOC100507217	0.193167	-0.817307	415.741	3.37294e-68	8.57199e-64
TCONS_00010591	SLCO3A1	0.577087	0.379787	721.626	3.93962e-68	1.00114e-63
TCONS_00010592	SLCO3A1	-0.577087	-0.379787	721.626	3.93962e-68	1.00114e-63
TCONS_00009036	ANKRD10	0.00357145	-0.954718	388.14	4.0783e-68	1.0363e-63
TCONS_00018970	ASB3	-1.00165	-1.1046	539.339	4.53289e-68	1.15176e-63
TCONS_00000680	HIAT1	-1.75686	-0.396722	953.746	6.70937e-68	1.70465e-63
TCONS_00000568	SRSF11	-1.17582	-0.551557	721.7	9.01249e-68	2.28971e-63
TCONS_00019046	SPRED2	-1.09805	-0.988208	577.144	9.04718e-68	2.29844e-63
TCONS_00146988_add	TIAM2	-1.9311	1.2432	369.894	9.71722e-68	2.46856e-63
TCONS_00032135	IFNA14	-2.69044	2.0883	300.057	1.10114e-67	2.79723e-63
TCONS_00017950	BCL2L11	-0.143901	-1.29897	343.988	1.13577e-67	2.88508e-63
TCONS_00132856_add	LOC100506746	-1.67698	1.54314	244.908	1.21065e-67	3.07518e-63
TCONS_00004426	SGMS1	-0.903257	-1.33282	497.78	1.21984e-67	3.09839e-63
TCONS_00012712	ACADVL	-0.0953578	0.669888	479.227	1.287e-67	3.26884e-63
TCONS_00012721	ACADVL	0.0953578	-0.669888	479.227	1.287e-67	3.26884e-63
TCONS_00021652	TBC1D22A	-2.59989	2.05331	281.71	1.32136e-67	3.35586e-63
TCONS_00012840	XLOC_004139	-2.62806	1.99601	294.462	1.32647e-67	3.36871e-63
TCONS_00014570	CYTH1	-1.16354	0.559679	583.609	1.34467e-67	3.41479e-63
TCONS_00014575	CYTH1	1.16354	-0.559679	583.609	1.34467e-67	3.41479e-63
TCONS_00015454	CD97	-0.145717	-1.07382	376.916	1.52816e-67	3.88046e-63
TCONS_00009821	NIN	-0.0106347	-1.2925	324.158	1.66962e-67	4.2395e-63
TCONS_00012759	TNFSF12-TNFSF13	-0.837583	-0.501936	677.388	1.72698e-67	4.38481e-63
TCONS_00016707	ISYNA1	-1.53852	-1.37725	669.029	2.02478e-67	5.14071e-63
TCONS_00016708	ISYNA1	1.53852	1.37725	669.029	2.02478e-67	5.14071e-63
TCONS_00012674	XAF1	-2.85702	1.37017	521.291	2.29496e-67	5.82622e-63
TCONS_00005369	KDM2A	1.29094	-0.696125	513.379	3.27605e-67	8.31658e-63
TCONS_00005372	KDM2A	-1.29094	0.696125	513.379	3.27605e-67	8.31658e-63
TCONS_00010768	ZNF106	-0.51232	-1.09786	431.446	3.47471e-67	8.82021e-63
TCONS_00022226	TATDN2	-2.27173	1.01833	529.311	3.73373e-67	9.47732e-63
TCONS_00002944	DCAF8	0.594784	-0.326318	725.525	4.04514e-67	1.02674e-62
TCONS_00002948	DCAF8	-0.594784	0.326318	725.525	4.04514e-67	1.02674e-62
TCONS_00031632	DQ588135	-0.0897198	-1.79498	323.048	4.07219e-67	1.03352e-62
TCONS_00027495	FAM26F	-1.22742	-1.80451	621.627	4.32519e-67	1.09769e-62
TCONS_00025364	SLC1A3	0.47922	-1.24629	280.075	5.18892e-67	1.31684e-62
TCONS_00004961	HIPK3	0.385421	-0.61737	494.261	5.19948e-67	1.31947e-62
TCONS_00025943	NPM1	1.72204	-0.368649	845.722	7.22387e-67	1.83313e-62
TCONS_00025954	NPM1	-1.72204	0.368649	845.722	7.22387e-67	1.83313e-62
TCONS_00009191	GMPR2	-0.337581	0.856324	389.53	7.63226e-67	1.93661e-62
TCONS_00031634	FAM95B1	-2.42874	1.22619	472.34	9.49848e-67	2.41005e-62
TCONS_00032887	XLOC_010367	-0.267363	2.72246	520.302	9.88672e-67	2.50846e-62
TCONS_00009015	ARGLU1	0.893636	-0.836001	402.662	1.00135e-66	2.54042e-62
TCONS_00009016	ARGLU1	-0.893636	0.836001	402.662	1.00135e-66	2.54042e-62
TCONS_00023934	RPL22L1	0.729483	-1.14313	293.872	1.07011e-66	2.71466e-62
TCONS_00005583	PIWIL4	1.59531	-1.05887	382.325	1.31549e-66	3.33688e-62
TCONS_00018531	RUFY4	-1.88456	-1.62212	792.385	1.94173e-66	4.92501e-62
TCONS_00005836	IRF7	-0.666312	0.920279	360.566	2.08668e-66	5.29246e-62
TCONS_00017952	BCL2L11	-2.99212	1.75086	425.758	2.22999e-66	5.65571e-62
TCONS_00010195	SPRED1	-1.74481	-1.08105	734.646	2.3755e-66	6.02449e-62
TCONS_00022334	GOLGA4	0.432833	-1.18855	291.77	2.38502e-66	6.0484e-62
TCONS_00009180	RNF31	0.342449	0.538603	578.235	2.57468e-66	6.52913e-62
TCONS_00005364	RBM14-RBM4	1.08258	-0.645921	513.078	2.98818e-66	7.57714e-62
TCONS_00017552	FOSL2	0.324844	-1.39766	266.052	3.44387e-66	8.73227e-62
TCONS_00024631	GAK	-0.356877	0.562918	521.912	3.93119e-66	9.96752e-62
TCONS_00021677	KLHDC7B	2.31957	-1.97525	234.554	6.24794e-66	1.58385e-61
TCONS_00021678	KLHDC7B	-2.31957	1.97525	234.554	6.24794e-66	1.58385e-61
TCONS_00022240	ATG7	-2.44559	1.73262	305.472	6.88917e-66	1.74627e-61
TCONS_00004811	AP2A2	-0.677784	-1.77894	458.199	7.30415e-66	1.85138e-61
TCONS_00024380	RAP1GDS1	-0.6271	0.416723	634.482	7.34663e-66	1.86208e-61
TCONS_00003316	IRF2BP2	-0.544474	-1.65134	411.165	7.75754e-66	1.96615e-61
TCONS_00004331	SVIL	0.0786065	1.09355	357.517	7.97412e-66	2.02096e-61
TCONS_00029043	GTF2I	-0.984741	-1.41633	511.421	8.1576e-66	2.06738e-61
TCONS_00003998	BTAF1	-0.175392	-0.80908	441.336	8.44759e-66	2.14079e-61
TCONS_00003999	BTAF1	0.175392	0.80908	441.336	8.44759e-66	2.14079e-61
TCONS_00012936	TP53I13	0.0286964	0.781823	435.455	8.7449e-66	2.21596e-61
TCONS_00031199	UBR5	1.31507	-0.876595	418.89	9.20046e-66	2.3313e-61
TCONS_00029520	GALNT11	-3.00063	1.58898	473.464	9.59742e-66	2.4318e-61
TCONS_00016680	AKAP8L	0.183786	-1.16318	314.14	9.70328e-66	2.45852e-61
TCONS_00002979	PFDN2	-2.09404	-0.68489	906.299	9.86763e-66	2.50006e-61
TCONS_00025006	XLOC_007838	-3.65177	1.49118	691.682	1.02308e-65	2.59197e-61
TCONS_00025007	XLOC_007838	3.65177	-1.49118	691.682	1.02308e-65	2.59197e-61
TCONS_00004668	SH3PXD2A	-3.41379	1.7101	549.031	1.46357e-65	3.70765e-61
TCONS_00019897	RIN2	-1.7274	0.74381	551.002	1.47604e-65	3.73909e-61
TCONS_00023034	AP2M1	1.73582	-0.572244	663.633	1.67433e-65	4.24125e-61
TCONS_00023035	AP2M1	-1.73582	0.572244	663.633	1.67433e-65	4.24125e-61
TCONS_00009712	AP1G2	-1.75129	-0.916981	753.329	1.76121e-65	4.46097e-61
TCONS_00004929	HTATIP2	-2.80102	0.861379	739.957	2.11813e-65	5.36459e-61
TCONS_00030564	SMIM19	-0.0818561	0.845864	402.427	2.12618e-65	5.38476e-61
TCONS_00008270	RSRC2	0.18757	-0.794431	413.315	2.16895e-65	5.49288e-61
TCONS_00027960	NELFE	-0.235051	0.835735	395.574	2.30208e-65	5.82957e-61
TCONS_00027961	NELFE	0.235051	-0.835735	395.574	2.30208e-65	5.82957e-61
TCONS_00023605	PDHB	2.15935	1.12605	852.751	2.87142e-65	7.27044e-61
TCONS_00023606	PDHB	-2.15935	-1.12605	852.751	2.87142e-65	7.27044e-61
TCONS_00030426	NAT1	-3.22196	1.59048	530.379	3.1562e-65	7.99087e-61
TCONS_00026471	TNIP1	-0.98639	-1.48731	511.43	4.29358e-65	1.08696e-60
TCONS_00024158	CPEB2	-1.08259	0.620149	523.797	4.89836e-65	1.24002e-60
TCONS_00004460	SAR1A	-2.75152	1.24828	534.179	6.76228e-65	1.71174e-60
TCONS_00027360	FBXO9	1.24985	0.757645	652.041	6.80719e-65	1.72303e-60
TCONS_00027361	FBXO9	-1.24985	-0.757645	652.041	6.80719e-65	1.72303e-60
TCONS_00006564	MSANTD4	-2.29924	1.33311	395.471	7.20376e-65	1.82327e-60
TCONS_00016962	DMPK	-0.10584	-0.863133	412.701	7.4648e-65	1.88927e-60
TCONS_00002358	DMRTA2	-3.20796	1.80995	466.092	8.62057e-65	2.18169e-60
TCONS_00019478	WIPF1	0.316617	0.499591	591.398	1.2011e-64	3.03962e-60
TCONS_00003974	IFIT1	0.195157	-1.29077	287.677	1.26477e-64	3.20063e-60
TCONS_00003975	IFIT1	-0.195157	1.29077	287.677	1.26477e-64	3.20063e-60
TCONS_00000167	SZRD1	-2.43696	1.35724	414.693	1.58093e-64	4.00037e-60
TCONS_00031788	NR4A3	-2.0181	1.20575	385.943	2.10137e-64	5.31668e-60
TCONS_00029419	GSTK1	1.39339	0.687869	706.419	2.23502e-64	5.6546e-60
TCONS_00029421	GSTK1	-1.39339	-0.687869	706.419	2.23502e-64	5.6546e-60
TCONS_00024176	CD38	-0.380701	-2.45747	627.812	3.10913e-64	7.86547e-60
TCONS_00001600	SRGAP2	-1.89945	0.48827	760.249	3.43169e-64	8.68114e-60
TCONS_00027032	MICB	0.722441	-1.23642	261.361	3.67393e-64	9.29358e-60
TCONS_00014443	LOC146880	-1.51974	0.853769	451.124	3.83857e-64	9.70967e-60
TCONS_00011862	DDX19A	-0.67527	0.435506	614.652	3.87146e-64	9.79247e-60
TCONS_00018624	SP100	-1.65782	0.472004	721.246	4.53134e-64	1.14611e-59
TCONS_00000235	SRRM1	-2.69094	1.4961	421.686	4.62205e-64	1.16901e-59
TCONS_00008076	TMCC3	-2.79256	1.62266	405.062	5.25674e-64	1.32948e-59
TCONS_00004303	ABI1	-2.79809	0.917062	702.207	5.31728e-64	1.34474e-59
TCONS_00028499	LATS1	-1.34242	-0.806296	658.397	6.91347e-64	1.74835e-59
TCONS_00030639	XLOC_009588	-3.46515	1.37023	677.253	6.93685e-64	1.75419e-59
TCONS_00031642	CBWD5	-2.59683	1.4092	428.947	9.18652e-64	2.32299e-59
TCONS_00010888	HERC1	-0.764023	0.908963	355.836	9.22096e-64	2.33161e-59
TCONS_00031658	CBWD3	-2.42248	1.58386	333.491	1.1048e-63	2.79338e-59
TCONS_00018189	GCA	0.861066	-0.954846	341.691	1.29935e-63	3.28514e-59
TCONS_00008670	IRG1	-3.4011	1.74365	532.643	1.77612e-63	4.49039e-59
TCONS_00015376	DNM2	-2.09073	-0.723299	885.377	1.84208e-63	4.65695e-59
TCONS_00012302	MYLK3	-2.81626	1.96525	339.961	2.23565e-63	5.65149e-59
TCONS_00030046	ATXN7L1	-0.223745	-1.12041	363.744	2.27426e-63	5.74888e-59
TCONS_00020243	C20orf96	0.597031	-1.53899	215.533	2.29523e-63	5.80165e-59
TCONS_00020244	C20orf96	-0.597031	1.53899	215.533	2.29523e-63	5.80165e-59
TCONS_00001727_add	AGO3	-0.570243	-0.689258	528.379	2.52844e-63	6.39064e-59
TCONS_00032149	KLHL9	-3.18587	1.44897	563.296	3.34785e-63	8.46135e-59
TCONS_00026543	LCP2	-2.44423	0.967437	579.312	3.40992e-63	8.61789e-59
TCONS_00006568	MSANTD4	1.03674	-1.00306	331.217	4.25995e-63	1.07657e-58
TCONS_00022399	LIMD1	1.69645	-1.22752	320.247	4.804e-63	1.21402e-58
TCONS_00022400	LIMD1	-1.69645	1.22752	320.247	4.804e-63	1.21402e-58
TCONS_00002139	FGR	1.98268	0.516842	926.876	5.1184e-63	1.29337e-58
TCONS_00002142	FGR	-1.98268	-0.516842	926.876	5.1184e-63	1.29337e-58
TCONS_00029447_add	OR8G1	-2.77415	1.98535	328.212	5.28615e-63	1.33565e-58
TCONS_00017720	ZNF638	-0.986827	-1.27314	504.092	6.1952e-63	1.56528e-58
TCONS_00032696	SETX	0.638088	-0.719206	428.764	7.23244e-63	1.82728e-58
TCONS_00030715	EBAG9	-1.0349	-0.873985	564.316	7.69115e-63	1.94309e-58
TCONS_00017410	TMEM150B	-1.81297	-0.732692	799.336	8.77767e-63	2.2175e-58
TCONS_00019432	IFIH1	1.88418	0.457023	929.499	8.8615e-63	2.23859e-58
TCONS_00019436	IFIH1	-1.88418	-0.457023	929.499	8.8615e-63	2.23859e-58
TCONS_00033411	AP1S2	2.50182	-0.63995	787.581	1.09181e-62	2.75781e-58
TCONS_00033412	AP1S2	-2.50182	0.63995	787.581	1.09181e-62	2.75781e-58
TCONS_00001457	MR1	0.365315	0.626864	521.676	1.24003e-62	3.13195e-58
TCONS_00001459	MR1	-0.365315	-0.626864	521.676	1.24003e-62	3.13195e-58
TCONS_00010524	AKAP13	-1.22715	0.755615	453.805	1.46661e-62	3.70364e-58
TCONS_00028718	ITGB8	-2.25865	2.22707	208.49	1.50406e-62	3.79805e-58
TCONS_00003126	DENND1B	-2.67278	0.802096	727.27	1.91257e-62	4.82944e-58
TCONS_00007302	ACTR6	3.33592	-1.66459	531.259	1.93541e-62	4.88691e-58
TCONS_00007303	ACTR6	-3.33592	1.66459	531.259	1.93541e-62	4.88691e-58
TCONS_00002588	KCNA3	-3.22209	1.30327	628.927	1.98104e-62	5.00174e-58
TCONS_00008084	CDK17	0.560064	-0.681609	443.189	2.3898e-62	6.03354e-58
TCONS_00008085	CDK17	-0.560064	0.681609	443.189	2.3898e-62	6.03354e-58
TCONS_00009619	CRIP1	1.77791	1.12635	726.116	2.65552e-62	6.70387e-58
TCONS_00009620	CRIP1	-1.77791	-1.12635	726.116	2.65552e-62	6.70387e-58
TCONS_00033005	GK	-0.496818	-0.224672	857.726	2.73706e-62	6.90915e-58
TCONS_00033023	GK	0.496818	0.224672	857.726	2.73706e-62	6.90915e-58
TCONS_00002734	PI4KB	0.44036	-0.846197	371.608	2.86378e-62	7.22846e-58
TCONS_00028380	REV3L	-1.01089	0.77096	422.268	3.43861e-62	8.67906e-58
TCONS_00011512	SPN	0.722312	-0.846964	372.085	3.5787e-62	9.03227e-58
TCONS_00011517	SPN	-0.722312	0.846964	372.085	3.5787e-62	9.03227e-58
TCONS_00032140	IFNA14	-3.27706	1.77313	488.937	4.02422e-62	1.01559e-57
TCONS_00018966	ASB3	-3.39246	1.74428	527.836	4.42266e-62	1.1161e-57
TCONS_00013299	LUC7L3	-0.0891047	-1.3502	309.368	4.9343e-62	1.24517e-57
TCONS_00028402	ZUFSP	2.42619	-1.56722	332.655	6.09774e-62	1.5387e-57
TCONS_00028403	ZUFSP	-2.42619	1.56722	332.655	6.09774e-62	1.5387e-57
TCONS_00027641	SYTL3	-0.740465	1.32393	233.42	7.90939e-62	1.9957e-57
TCONS_00031216	TRPS1	1.26058	-1.51285	199.574	8.67284e-62	2.18824e-57
TCONS_00000954_add	NBPF3	-2.02039	-1.39378	799.138	8.72771e-62	2.20192e-57
TCONS_00018427	CASP8	-2.93803	1.37458	519.008	9.53781e-62	2.4062e-57
TCONS_00030711	ENY2	-3.23616	1.52556	544.293	1.03569e-61	2.61274e-57
TCONS_00018987	CCDC88A	0.298523	-0.52561	526.898	1.19887e-61	3.02428e-57
TCONS_00032885	XLOC_010366	0.139197	-1.07392	319.141	2.19719e-61	5.54198e-57
TCONS_00024675	ACOX3	0.0259711	-0.527296	533.015	2.38974e-61	6.02741e-57
TCONS_00020691	RBM39	-3.18812	1.56586	516.245	2.43427e-61	6.13947e-57
TCONS_00032786	DPP7	-1.57459	-0.588377	776.58	2.43628e-61	6.14431e-57
TCONS_00002690	APH1A	-1.39161	0.332159	796.977	2.56868e-61	6.47795e-57
TCONS_00004909	FAR1	-0.652047	-0.998792	451.027	3.60835e-61	9.09953e-57
TCONS_00004910	FAR1	0.652047	0.998792	451.027	3.60835e-61	9.09953e-57
TCONS_00014007	SLFN12	-1.06274	1.11373	287.74	3.66879e-61	9.25122e-57
TCONS_00008621	SETDB2	0.0126687	-2.14266	349.551	5.13486e-61	1.29476e-56
TCONS_00004701	MCMBP	0.921903	-0.479674	586.775	6.06032e-61	1.52799e-56
TCONS_00025931	MAT2B	0.0155573	-0.420187	605.915	6.28299e-61	1.58407e-56
TCONS_00033599	LAMP2	-1.33532	-0.44944	785.148	6.63422e-61	1.67255e-56
TCONS_00033600	LAMP2	1.33532	0.44944	785.148	6.63422e-61	1.67255e-56
TCONS_00021649	TBC1D22A	0.386896	-1.91816	227.003	8.89483e-61	2.24221e-56
TCONS_00006269	NXF1	-0.181906	-0.987425	372.879	8.93004e-61	2.251e-56
TCONS_00006270	NXF1	0.181906	0.987425	372.879	8.93004e-61	2.251e-56
TCONS_00015842	CLASRP	-2.16216	1.30337	362.201	9.01416e-61	2.27202e-56
TCONS_00018141	GPD2	-3.4457	1.5241	601.392	1.02404e-60	2.58099e-56
TCONS_00030867	ERICH1	-0.148509	0.853105	375.523	1.1854e-60	2.98757e-56
TCONS_00030869	ERICH1	0.148509	-0.853105	375.523	1.1854e-60	2.98757e-56
TCONS_00003289	TTC13	-1.065	-1.04406	533.484	1.24505e-60	3.13764e-56
TCONS_00003500	FAM208B	-2.1484	1.5278	286.59	1.28879e-60	3.24775e-56
TCONS_00000233	SRRM1	-1.3642	-1.73735	642.42	1.31094e-60	3.30343e-56
TCONS_00024104	SH3BP2	-1.16293	-1.15916	546.178	1.64843e-60	4.15339e-56
TCONS_00025765	SLC25A48	-1.95368	1.27625	332.443	1.97524e-60	4.97643e-56
TCONS_00027372	PHF3	-3.17776	1.79306	456.01	2.35455e-60	5.93183e-56
TCONS_00029595	TNRC18	-1.6471	0.656624	566.681	2.97395e-60	7.49198e-56
TCONS_00029980	MCM7	-1.30216	-1.53944	589.59	3.44328e-60	8.67397e-56
TCONS_00029981	MCM7	1.30216	1.53944	589.59	3.44328e-60	8.67397e-56
TCONS_00028498	LATS1	0.953135	-0.732051	428.306	3.49277e-60	8.79795e-56
TCONS_00014763	TGIF1	-3.21816	1.33863	604.057	3.75428e-60	9.45629e-56
TCONS_00020971	SON	-1.98586	0.496778	756.157	3.94912e-60	9.94665e-56
TCONS_00021896	TMEM184B	-0.874341	1.02426	303.137	5.59678e-60	1.40955e-55
TCONS_00029640	HNRNPA2B1	-0.828252	0.450934	596.565	5.6107e-60	1.413e-55
TCONS_00017637	MSH6	-0.610825	-2.01783	492.875	5.96942e-60	1.50328e-55
TCONS_00005041	MADD	-1.33943	-1.0938	595.684	6.11529e-60	1.53995e-55
TCONS_00025365	SLC1A3	-3.5835	1.62327	608.988	6.75332e-60	1.70055e-55
TCONS_00012382	CENPT	-1.64898	0.718336	527.609	6.95487e-60	1.75124e-55
TCONS_00013491	SEC14L1	-2.06084	0.976315	473.101	7.22081e-60	1.81813e-55
TCONS_00009363	KIAA0247	-1.73526	-0.435285	889.682	7.33553e-60	1.84694e-55
TCONS_00009364	KIAA0247	1.73526	0.435285	889.682	7.33553e-60	1.84694e-55
TCONS_00024178	MED28	0.49488	0.619213	530.965	8.09807e-60	2.03877e-55
TCONS_00024179	MED28	-0.49488	-0.619213	530.965	8.09807e-60	2.03877e-55
TCONS_00002380	YIPF1	-2.14062	1.50819	287.724	8.15772e-60	2.05362e-55
TCONS_00163453_add	TNKS	-1.4764	0.950636	382.159	8.72828e-60	2.19717e-55
TCONS_00008001	CYP27B1	-2.46036	1.76539	281.53	8.92585e-60	2.24682e-55
TCONS_00029535	RBM33	-0.413771	-0.322827	719.271	9.02533e-60	2.27177e-55
TCONS_00000561	MIER1	-0.0127294	0.857893	380.925	1.07513e-59	2.70599e-55
TCONS_00030882	SGK223	1.24289	-0.815861	413.408	1.08061e-59	2.71969e-55
TCONS_00008672	IRG1	-3.57774	1.63682	603.165	1.14904e-59	2.89178e-55
TCONS_00032051	PHPT1	-0.268877	1.03509	310.108	1.2795e-59	3.21998e-55
TCONS_00024867	ANTXR2	0.472315	0.225751	842.061	1.3769e-59	3.46496e-55
TCONS_00031635	DQ588135	-2.01752	1.97324	174.718	1.90307e-59	4.7885e-55
TCONS_00012123	FOPNL	3.56154	-1.57481	615.117	2.08706e-59	5.25105e-55
TCONS_00012125	FOPNL	-3.56154	1.57481	615.117	2.08706e-59	5.25105e-55
TCONS_00000807	SRGAP2B	-3.09486	1.00693	719.302	2.13862e-59	5.38033e-55
TCONS_00019261	RNF149	-1.43536	0.448416	679.368	2.14896e-59	5.40613e-55
TCONS_00023198	IQSEC1	1.52736	-0.521908	634.999	2.54601e-59	6.40474e-55
TCONS_00023201	IQSEC1	-1.52736	0.521908	634.999	2.54601e-59	6.40474e-55
TCONS_00023660	CGGBP1	0.751182	-0.917109	333.799	2.59386e-59	6.52461e-55
TCONS_00012262	BOLA2	-0.751506	0.593956	486.767	2.62253e-59	6.59644e-55
TCONS_00029999	LRCH4	-1.96761	-0.589857	874.97	3.49353e-59	8.78658e-55
TCONS_00012190	ARHGAP17	-1.65646	1.09663	345.699	3.6043e-59	9.06483e-55
TCONS_00003059	ABL2	-2.06532	-1.67443	851.558	3.62253e-59	9.11029e-55
TCONS_00008261	ZCCHC8	-1.56294	0.765579	482.547	3.79806e-59	9.55137e-55
TCONS_00008263	ZCCHC8	1.56294	-0.765579	482.547	3.79806e-59	9.55137e-55
TCONS_00008002	CYP27B1	1.62688	-1.54076	207.017	3.90087e-59	9.80914e-55
TCONS_00019045	SPRED2	-0.6243	-1.23486	407.062	5.50494e-59	1.38422e-54
TCONS_00006819	CLEC2D	-0.148651	-0.880516	388.155	5.83328e-59	1.46672e-54
TCONS_00000544	AK4	-0.639354	-1.83904	448.863	6.91906e-59	1.73959e-54
TCONS_00012934	TP53I13	-0.839448	-0.579523	602.108	9.30287e-59	2.33856e-54
TCONS_00014828	LAMA3	2.42299	-2.04213	244.242	1.00021e-58	2.51423e-54
TCONS_00014829	LAMA3	-2.42299	2.04213	244.242	1.00021e-58	2.51423e-54
TCONS_00025981	HRH2	-1.13987	-0.894355	567.961	1.01305e-58	2.5463e-54
TCONS_00120185_add	LOC401074	-3.43819	1.644	557.711	1.01973e-58	2.56298e-54
TCONS_00011059	HOMER2	-0.363389	1.31131	244.451	1.09428e-58	2.75025e-54
TCONS_00010780	XLOC_003466	0.800806	-2.69625	376.026	1.23601e-58	3.10634e-54
TCONS_00010781	XLOC_003466	-0.800806	2.69625	376.026	1.23601e-58	3.10634e-54
TCONS_00027521	NCOA7	-0.84102	-2.11975	625.37	1.32951e-58	3.34105e-54
TCONS_00012441	MLKL	-1.78672	-0.902946	738.303	1.42373e-58	3.5777e-54
TCONS_00010031	WARS	-1.34543	1.48872	194.786	1.81513e-58	4.56106e-54
TCONS_00018435	CASP8	-1.67996	-1.32112	680.198	2.4493e-58	6.15435e-54
TCONS_00001865	HES4	-2.86709	1.7781	370.657	3.13057e-58	7.86587e-54
TCONS_00006602	FXYD6-FXYD2	-3.02421	1.45645	497.703	3.3858e-58	8.50682e-54
TCONS_00008852	TSC22D1	0.06305	1.86828	305.242	3.51697e-58	8.83603e-54
TCONS_00008853	TSC22D1	-0.06305	-1.86828	305.242	3.51697e-58	8.83603e-54
TCONS_00002808	ADAR	-2.07473	0.569006	711.019	3.6326e-58	9.12581e-54
TCONS_00014779	TGIF1	0.832406	-0.674473	440.543	4.2301e-58	1.06264e-53
TCONS_00030687	OSR2	-3.54412	1.59681	600.057	4.57726e-58	1.14981e-53
TCONS_00025039	OTUD4	-1.43795	-0.871643	645.039	4.87558e-58	1.2247e-53
TCONS_00030495	ELP3	-0.218894	-0.456044	582.268	5.17892e-58	1.30084e-53
TCONS_00030496	ELP3	0.218894	0.456044	582.268	5.17892e-58	1.30084e-53
TCONS_00000953	TNFAIP8L2-SCNM1	1.29346	-0.932901	359.035	5.85338e-58	1.47014e-53
TCONS_00000956	TNFAIP8L2-SCNM1	-1.29346	0.932901	359.035	5.85338e-58	1.47014e-53
TCONS_00009720	TM9SF1	1.76971	-0.317789	877.635	6.92237e-58	1.73848e-53
TCONS_00009722	TM9SF1	-1.76971	0.317789	877.635	6.92237e-58	1.73848e-53
TCONS_00016492	CLEC4G	-1.71923	-1.06082	696.453	8.34864e-58	2.09651e-53
TCONS_00010338	RAB8B	-2.619	1.25301	470.017	8.47447e-58	2.12802e-53
TCONS_00005639	RBM7	-0.310257	-0.456838	589.295	9.13978e-58	2.295e-53
TCONS_00005640	RBM7	0.310257	0.456838	589.295	9.13978e-58	2.295e-53
TCONS_00073336_add	C17orf85	-2.69076	1.52946	386.859	1.11489e-57	2.79927e-53
TCONS_00030616	C8orf44-SGK3	-1.59181	-1.03754	661.534	1.15094e-57	2.88966e-53
TCONS_00009235	PTGER2	-1.49249	-0.545233	758.424	1.18365e-57	2.97166e-53
TCONS_00009236	PTGER2	1.49249	0.545233	758.424	1.18365e-57	2.97166e-53
TCONS_00003319	ARID4B	1.89962	0.994298	754.931	1.43998e-57	3.61493e-53
TCONS_00003322	ARID4B	-1.89962	-0.994298	754.931	1.43998e-57	3.61493e-53
TCONS_00020143	PTPN1	0.312248	0.478094	574.071	1.80805e-57	4.53857e-53
TCONS_00020144	PTPN1	-0.312248	-0.478094	574.071	1.80805e-57	4.53857e-53
TCONS_00032989	ZFX	-0.288311	-0.955654	381.044	1.98886e-57	4.99205e-53
TCONS_00029249	ZNF277	-2.70532	1.43894	418.689	2.7636e-57	6.93609e-53
TCONS_00029250	ZNF277	2.70532	-1.43894	418.689	2.7636e-57	6.93609e-53
TCONS_00030779	RHPN1	-0.993557	0.967412	316.34	3.37799e-57	8.47706e-53
TCONS_00029440_add	OR8G1	-2.72202	1.81809	327.031	6.2349e-57	1.56446e-52
TCONS_00033529	RLIM	0.400115	-0.822043	358.465	6.86862e-57	1.72341e-52
TCONS_00033530	RLIM	-0.400115	0.822043	358.465	6.86862e-57	1.72341e-52
TCONS_00033568	MORF4L2	-1.76699	-1.0852	704.335	9.89075e-57	2.48129e-52
TCONS_00000982	CHTOP	-0.500658	-0.480857	591.135	1.209e-56	3.03277e-52
TCONS_00001722	MIA3	-0.465011	0.548831	491.355	1.22945e-56	3.08395e-52
TCONS_00021098	PRMT2	-0.495828	-0.428403	625.567	1.232e-56	3.09024e-52
TCONS_00010801	ATP8B4	-2.35783	1.64074	279.456	1.29609e-56	3.25084e-52
TCONS_00014892	ZCCHC2	0.403567	0.416243	623.137	1.40978e-56	3.53586e-52
TCONS_00018282	GLS	-2.36031	0.769987	638.783	1.58652e-56	3.97884e-52
TCONS_00021598	L3MBTL2	-2.60071	1.73859	308.87	1.64729e-56	4.13108e-52
TCONS_00018635	COPS7B	-0.162776	-1.38566	298.104	1.70481e-56	4.27516e-52
TCONS_00018636	COPS7B	0.162776	1.38566	298.104	1.70481e-56	4.27516e-52
TCONS_00031806	MSANTD3	0.493391	-2.08207	221.893	1.76198e-56	4.41815e-52
TCONS_00009905	ENTPD5	1.37964	-1.28486	238.698	1.90824e-56	4.78471e-52
TCONS_00009906	ENTPD5	-1.37964	1.28486	238.698	1.90824e-56	4.78471e-52
TCONS_00006893	FGFR1OP2	-0.505096	-0.768041	461.141	1.96844e-56	4.93526e-52
TCONS_00007146	RBMS2	0.333789	0.392925	633.183	2.0981e-56	5.26014e-52
TCONS_00013024	CCL4	0.704895	-2.8265	581.074	2.12859e-56	5.33637e-52
TCONS_00032697	SETX	-1.67186	0.617878	580.025	2.17548e-56	5.45372e-52
TCONS_00000512	OSBPL9	-1.74989	1.01747	380.112	2.6007e-56	6.51917e-52
TCONS_00015917	SNRNP70	-0.73972	-0.553858	585.618	2.66418e-56	6.67804e-52
TCONS_00013146	IFI35	-2.20804	0.305434	995.004	2.77723e-56	6.96113e-52
TCONS_00013147	IFI35	2.20804	-0.305434	995.004	2.77723e-56	6.96113e-52
TCONS_00019851	PANK2	0.585154	-0.397149	608.575	2.86721e-56	7.1858e-52
TCONS_00009724	TINF2	1.30089	0.48367	736.954	2.94698e-56	7.38543e-52
TCONS_00009729	TINF2	-1.30089	-0.48367	736.954	2.94698e-56	7.38543e-52
TCONS_00000909	PRPF3	0.188462	-0.673878	424.578	3.66609e-56	9.18686e-52
TCONS_00005026	DDB2	-1.91889	-0.603154	842.736	3.86244e-56	9.67851e-52
TCONS_00001527	SWT1	-3.39177	1.64036	540.36	3.8733e-56	9.70534e-52
TCONS_00027593	UTRN	-1.8342	-1.61738	759.975	4.54952e-56	1.13993e-51
TCONS_00004591_add	LINC00869	-2.9723	1.59695	432.243	4.74195e-56	1.18809e-51
TCONS_00012489	XLOC_004047	-3.65146	1.54807	641.201	5.81017e-56	1.45562e-51
TCONS_00017549	FOSL2	-0.483338	0.694302	408.2	6.23649e-56	1.56236e-51
TCONS_00016206	LILRB4	-0.0801721	0.280499	718.245	8.04882e-56	2.01631e-51
TCONS_00006409	ARAP1	-0.148339	0.649355	436.501	8.10421e-56	2.03011e-51
TCONS_00166694_add	ZNF395	-0.407289	-1.95593	415.256	8.47631e-56	2.12323e-51
TCONS_00029451_add	OR8G1	0.503322	-2.55341	420.782	8.66192e-56	2.16964e-51
TCONS_00032750	CARD9	-1.75136	-0.9353	711.581	8.96732e-56	2.24605e-51
TCONS_00018291	NABP1	-1.72545	0.576897	616.593	9.32463e-56	2.33545e-51
TCONS_00004809	AP2A2	-0.479772	1.03093	283.28	9.33912e-56	2.33898e-51
TCONS_00002350	EFCAB14	0.433326	0.649781	490.763	1.11424e-55	2.79051e-51
TCONS_00005728	STT3A	-3.33999	1.32398	627.071	1.32374e-55	3.31503e-51
TCONS_00005731	STT3A	3.33999	-1.32398	627.071	1.32374e-55	3.31503e-51
TCONS_00007636	ZNF384	-1.93086	1.16765	347.335	1.42e-55	3.55582e-51
TCONS_00011356	NOMO1	-0.583507	1.46798	193.266	1.76308e-55	4.41475e-51
TCONS_00014004	SLFN12	-0.332426	-0.862849	402.333	1.77588e-55	4.44663e-51
TCONS_00097378_add	TTN-AS1	1.05834	0.497435	672.303	1.85083e-55	4.63411e-51
TCONS_00097381_add	TTN-AS1	-1.05834	-0.497435	672.303	1.85083e-55	4.63411e-51
TCONS_00027340	TMEM63B	1.57567	-1.39709	221.889	1.91535e-55	4.79528e-51
TCONS_00025851	ZMAT2	0.132895	-0.655287	432.694	1.94269e-55	4.86352e-51
TCONS_00018453	NRP2	-2.3221	1.27912	381.02	2.17122e-55	5.43544e-51
TCONS_00011516	QPRT	-2.96295	1.52705	447.693	2.46167e-55	6.1623e-51
TCONS_00031206	AZIN1	1.34251	-0.335824	757.594	2.58814e-55	6.47862e-51
TCONS_00024882	HNRPDL	-0.735333	-0.641125	540.953	2.84139e-55	7.11227e-51
TCONS_00028064	HLA-DOA	2.93547	-1.19805	564.435	3.42498e-55	8.57239e-51
TCONS_00028069	HLA-DOA	-2.93547	1.19805	564.435	3.42498e-55	8.57239e-51
TCONS_00010503	IL16	0.286555	-2.18509	297.77	3.68317e-55	9.21788e-51
TCONS_00016412	MFSD12	-0.773748	-0.617912	556.894	3.99068e-55	9.98709e-51
TCONS_00018968	ASB3	0.508153	-1.42102	202.972	4.12463e-55	1.03219e-50
TCONS_00009823	NIN	-0.758858	0.613954	456.335	4.76851e-55	1.19327e-50
TCONS_00009004	ABCC4	-1.27192	-1.73464	611.365	4.97858e-55	1.24579e-50
TCONS_00006732	ERC1	-1.80409	1.29457	278.794	6.15948e-55	1.54116e-50
TCONS_00033295	SLC9A6	-2.00618	-1.2617	766.339	8.03718e-55	2.01082e-50
TCONS_00010581	MAN2A2	-1.32973	-0.8275	612.252	8.39872e-55	2.10111e-50
TCONS_00026163	TAF9	-1.92857	0.265827	971.13	9.94432e-55	2.48767e-50
TCONS_00171130_add	ANKRD20A4	-1.90757	1.11797	358.849	1.006e-54	2.5165e-50
TCONS_00160271_add	POLR2J2	-3.01893	1.28528	547.988	1.06112e-54	2.65429e-50
TCONS_00030503	LEPROTL1	-1.24927	0.503438	581.823	1.28855e-54	3.22292e-50
TCONS_00030504	LEPROTL1	1.24927	-0.503438	581.823	1.28855e-54	3.22292e-50
TCONS_00020624	BCL2L1	-1.38462	-0.865828	617.414	1.38451e-54	3.46267e-50
TCONS_00018384	CFLAR	-2.93783	0.822842	755.294	1.53433e-54	3.8372e-50
TCONS_00031208	AZIN1	-1.45208	-0.307159	894.208	1.71187e-54	4.28104e-50
TCONS_00007839	TFCP2	0.164288	-1.17514	267.541	1.78583e-54	4.46582e-50
TCONS_00000810	SRGAP2B	-1.01374	0.563684	506.69	2.19125e-54	5.47943e-50
TCONS_00025801	MATR3	-1.18506	-0.830901	573.627	2.32257e-54	5.80759e-50
TCONS_00024983	CAMK2D	-0.196876	-1.42779	294.549	2.3497e-54	5.87495e-50
TCONS_00014215	ARHGAP27	-1.92835	-1.44073	754.77	2.82529e-54	7.0638e-50
TCONS_00008535	NHLRC3	1.12446	0.6517	611.432	3.05811e-54	7.64557e-50
TCONS_00008536	NHLRC3	-1.12446	-0.6517	611.432	3.05811e-54	7.64557e-50
TCONS_00030787	GSDMD	-1.16608	1.41275	184.882	3.11054e-54	7.77604e-50
TCONS_00032929	MSL3	-2.79903	0.85396	695.483	4.07222e-54	1.01797e-49
TCONS_00006899	STK38L	-1.69009	0.941127	393.705	4.42087e-54	1.10504e-49
TCONS_00021597	L3MBTL2	2.10276	-2.01307	179.884	4.61693e-54	1.154e-49
TCONS_00018254	ITGAV	-0.55144	-0.709607	477.877	4.61883e-54	1.15443e-49
TCONS_00003054	ABL2	-0.861634	0.401407	615.233	8.88195e-54	2.21986e-49
TCONS_00014891	ZCCHC2	-1.69994	-0.492715	820.698	8.92155e-54	2.22967e-49
TCONS_00000474	TOE1	-0.872806	1.01455	278.609	1.01666e-53	2.54072e-49
TCONS_00000475	TOE1	0.872806	-1.01455	278.609	1.01666e-53	2.54072e-49
TCONS_00011080	POLG	-2.50818	1.19684	448.533	1.07277e-53	2.68076e-49
TCONS_00170415_add	CDKN2B-AS1	-2.20657	1.83473	207.064	1.13423e-53	2.8342e-49
TCONS_00027374	FAM135A	0.584065	-0.994955	281.746	1.13713e-53	2.84134e-49
TCONS_00016016	MYADM	0.622114	1.1046	397.595	1.32527e-53	3.31119e-49
TCONS_00016017	MYADM	-0.622114	-1.1046	397.595	1.32527e-53	3.31119e-49
TCONS_00021026	MX1	-0.591011	0.573427	465.669	1.4042e-53	3.50797e-49
TCONS_00008850	EPSTI1	-1.42373	-0.397383	808.004	1.46237e-53	3.65316e-49
TCONS_00065184_add	AK126539	-1.36708	-1.81567	674.833	1.46852e-53	3.66837e-49
TCONS_00001357	RCSD1	3.13591	-1.24196	594.104	1.48394e-53	3.70675e-49
TCONS_00001358	RCSD1	-3.13591	1.24196	594.104	1.48394e-53	3.70675e-49
TCONS_00024282	RUFY3	-0.781495	-0.44082	645.352	1.68523e-53	4.2092e-49
TCONS_00012330	AMFR	-1.51156	0.97119	350.258	1.69242e-53	4.22698e-49
TCONS_00009380	SRSF5	1.43604	-0.506598	604.426	1.75405e-53	4.38075e-49
TCONS_00009381	SRSF5	-1.43604	0.506598	604.426	1.75405e-53	4.38075e-49
TCONS_00018892_add	AGAP9	-2.81902	1.48341	417.512	1.77388e-53	4.4299e-49
TCONS_00018456	NRP2	-0.656471	-0.562968	554.076	1.94576e-53	4.85875e-49
TCONS_00001819	ACTN2	-2.90139	1.69702	387.296	2.02837e-53	5.06483e-49
TCONS_00031751	TDRD7	3.22621	-1.11928	675.393	2.07319e-53	5.17654e-49
TCONS_00031753	TDRD7	-3.22621	1.11928	675.393	2.07319e-53	5.17654e-49
TCONS_00005009	DGKZ	0.885277	-1.54839	158.691	2.53386e-53	6.32628e-49
TCONS_00128706_add	MYL5	-1.57582	-1.02113	640.658	2.92758e-53	7.309e-49
TCONS_00029276	ST7	-2.48207	0.914805	572.932	2.92847e-53	7.31094e-49
TCONS_00026198	COL4A3BP	1.33012	-0.931176	342.755	2.94538e-53	7.35284e-49
TCONS_00026199	COL4A3BP	-1.33012	0.931176	342.755	2.94538e-53	7.35284e-49
TCONS_00021040	RRP1B	-0.972668	1.41493	177.028	3.01367e-53	7.52273e-49
TCONS_00021043	RRP1B	0.972668	-1.41493	177.028	3.01367e-53	7.52273e-49
TCONS_00006006	CD59	-1.08587	0.341544	700.52	3.10934e-53	7.7609e-49
TCONS_00008883	LPAR6	-2.21815	0.851487	541.86	3.76524e-53	9.39691e-49
TCONS_00008886	LPAR6	2.21815	-0.851487	541.86	3.76524e-53	9.39691e-49
TCONS_00019451	STK39	1.44162	-1.25154	239.253	3.98947e-53	9.95571e-49
TCONS_00022423	ZNF589	1.25173	-0.950817	325.277	4.12019e-53	1.02815e-48
TCONS_00022892	TSC22D2	0.557869	-0.768247	361.86	4.38213e-53	1.09347e-48
TCONS_00014277	LRRC59	-1.12608	-1.68418	551.802	4.50141e-53	1.12319e-48
TCONS_00014280	LRRC59	1.12608	1.68418	551.802	4.50141e-53	1.12319e-48
TCONS_00011058	HOMER2	-0.168202	-1.6977	295.663	5.12081e-53	1.27759e-48
TCONS_00031837	PALM2-AKAP2	-0.520288	-1.35937	356.129	5.38928e-53	1.34441e-48
TCONS_00095864_add	MIR5696	0.771373	-1.93623	154.04	5.9673e-53	1.48854e-48
TCONS_00008246	KDM2B	-2.46203	0.943643	551.327	6.05201e-53	1.50961e-48
TCONS_00023700	CCDC80	1.65379	-1.59916	171.356	6.67467e-53	1.66486e-48
TCONS_00023701	CCDC80	-1.65379	1.59916	171.356	6.67467e-53	1.66486e-48
TCONS_00020837	ZBP1	0.221746	-2.3713	434.791	7.38471e-53	1.84182e-48
TCONS_00008173	NAA25	-1.45619	0.891033	374.59	8.61032e-53	2.14741e-48
TCONS_00025371	SLC1A3	-3.64881	1.33649	703.375	9.7436e-53	2.42996e-48
TCONS_00028559	RNASET2	-3.49232	1.54962	585.199	1.06731e-52	2.66167e-48
TCONS_00028560	RNASET2	3.49232	-1.54962	585.199	1.06731e-52	2.66167e-48
TCONS_00016636	STX10	1.65688	-2.0043	124.466	1.25284e-52	3.12382e-48
TCONS_00008271	RSRC2	-1.68169	-1.60336	705.361	1.31222e-52	3.27176e-48
TCONS_00030799	ZNF707	-1.64626	0.754253	473.57	1.5026e-52	3.74599e-48
TCONS_00013233	CDK5RAP3	-2.67944	1.51998	368.485	1.5064e-52	3.75531e-48
TCONS_00029138	PILRB	-2.49486	1.12449	470.935	1.74091e-52	4.33975e-48
TCONS_00031569	ACO1	-1.63355	-1.17488	644.675	1.86364e-52	4.6455e-48
TCONS_00012868	SMCR8	1.39672	-1.30338	216.924	2.07365e-52	5.16878e-48
TCONS_00012869	SMCR8	-1.39672	1.30338	216.924	2.07365e-52	5.16878e-48
TCONS_00032964	SAT1	-1.57583	-0.476609	790.563	2.07586e-52	5.17388e-48
TCONS_00014920	NFATC1	0.752423	-1.22622	213.029	2.08513e-52	5.19678e-48
TCONS_00007590	SLC6A12	-2.18281	1.23282	356.075	2.20582e-52	5.49668e-48
TCONS_00024596	KLHL2	-2.61953	1.5955	333.129	2.83567e-52	7.06563e-48
TCONS_00023995	BCL6	-2.39134	0.979577	512.544	2.92929e-52	7.29863e-48
TCONS_00007931	BAZ2A	-0.849798	0.788959	358.228	3.13526e-52	7.81149e-48
TCONS_00004419	SGMS1	-1.46731	0.783169	426.512	3.2222e-52	8.02779e-48
TCONS_00010499	IL16	-2.21254	2.04085	215.403	3.44788e-52	8.5897e-48
TCONS_00018595	CCL20	-2.10836	1.87342	183.992	3.47256e-52	8.65085e-48
TCONS_00023985	TRA2B	-1.72149	0.686715	525.79	3.48148e-52	8.67271e-48
TCONS_00023986	TRA2B	1.72149	-0.686715	525.79	3.48148e-52	8.67271e-48
TCONS_00024460	LARP7	-2.29298	0.876425	541.532	3.65424e-52	9.10235e-48
TCONS_00023587	HESX1	-0.99869	2.28039	179.459	3.70363e-52	9.225e-48
TCONS_00024255	SRD5A3	2.78465	-1.65874	360.409	4.22278e-52	1.05173e-47
TCONS_00029893	SEMA3D	1.766	-1.97898	132.58	4.34211e-52	1.08136e-47
TCONS_00007585	SLC6A12	-2.39149	0.995967	503.434	5.03472e-52	1.2537e-47
TCONS_00022840	MRAS	-1.56443	0.789679	437.626	5.04103e-52	1.25522e-47
TCONS_00030057	ATXN7L1	-2.08543	0.612799	653.357	5.29221e-52	1.31771e-47
TCONS_00004636	LDB1	-2.01922	0.977716	428.621	5.3585e-52	1.33416e-47
TCONS_00013025	XLOC_004196	0.68298	-1.28925	199.377	6.74764e-52	1.67989e-47
TCONS_00013031	XLOC_004196	-0.68298	1.28925	199.377	6.74764e-52	1.67989e-47
TCONS_00004941	PRRG4	-2.28643	0.80273	579.81	6.8096e-52	1.69518e-47
TCONS_00029868	PMS2P3	-1.01346	1.96751	129.471	6.85789e-52	1.70714e-47
TCONS_00029869	PMS2P3	1.01346	-1.96751	129.471	6.85789e-52	1.70714e-47
TCONS_00002541	TMED5	-2.82634	0.832691	705.099	7.55788e-52	1.88116e-47
TCONS_00002542	TMED5	2.82634	-0.832691	705.099	7.55788e-52	1.88116e-47
TCONS_00015839	CLASRP	-1.51183	-1.03338	615.543	7.86212e-52	1.95672e-47
TCONS_00015082	ZNF516	-2.67209	0.990197	576.498	8.25716e-52	2.05496e-47
TCONS_00009960	SMEK1	-1.36482	0.616393	505.795	9.65785e-52	2.40336e-47
TCONS_00007820	SLC11A2	-1.20689	-0.471021	701.797	1.10348e-51	2.74579e-47
TCONS_00007827	SLC11A2	1.20689	0.471021	701.797	1.10348e-51	2.74579e-47
TCONS_00008251	KDM2B	-1.36483	-1.03541	574.49	1.1274e-51	2.80508e-47
TCONS_00023315	ZDHHC3	-0.0351196	-0.362076	615.677	1.42893e-51	3.55517e-47
TCONS_00023316	ZDHHC3	0.0351196	0.362076	615.677	1.42893e-51	3.55517e-47
TCONS_00012313	SIAH1	0.290623	-1.10363	257.049	1.43025e-51	3.55818e-47
TCONS_00012314	SIAH1	-0.290623	1.10363	257.049	1.43025e-51	3.55818e-47
TCONS_00008784	FLT1	-0.571526	-0.718088	466.602	1.44907e-51	3.60472e-47
TCONS_00008785	FLT1	0.571526	0.718088	466.602	1.44907e-51	3.60472e-47
TCONS_00010159	CYFIP1	-1.33583	1.06702	282.105	1.51474e-51	3.76776e-47
TCONS_00028383	REV3L	-3.28512	1.42902	555.848	1.614e-51	4.0145e-47
TCONS_00166460_add	PSD3	-0.529805	-1.88517	434.846	1.83566e-51	4.56528e-47
TCONS_00005982	HPS5	-1.62557	-0.953338	654.454	2.25879e-51	5.61695e-47
TCONS_00032133	IFNA21	-1.17452	2.89793	658.96	2.70833e-51	6.73399e-47
TCONS_00171122_add	ANKRD20A4	-2.25934	1.08749	426.804	2.81227e-51	6.99215e-47
TCONS_00008389	SCARB1	1.39308	0.854803	606.723	3.37298e-51	8.38557e-47
TCONS_00008390	SCARB1	-1.39308	-0.854803	606.723	3.37298e-51	8.38557e-47
TCONS_00022446	ARIH2	-1.73922	0.721186	503.421	3.74073e-51	9.29871e-47
TCONS_00027165	BRD2	0.642888	-0.246508	760.494	3.98482e-51	9.90506e-47
TCONS_00016364	TCF3	0.370087	-0.660124	402.914	4.1439e-51	1.03001e-46
TCONS_00016366	TCF3	-0.370087	0.660124	402.914	4.1439e-51	1.03001e-46
TCONS_00010398	KIF23	-1.30406	1.899	113.905	4.90276e-51	1.21848e-46
TCONS_00003606	COMMD3-BMI1	1.91219	-0.523712	675.549	5.18547e-51	1.28869e-46
TCONS_00003607	COMMD3-BMI1	-1.91219	0.523712	675.549	5.18547e-51	1.28869e-46
TCONS_00008939	TBC1D4	-1.20248	-1.13151	520.698	5.59262e-51	1.38977e-46
TCONS_00031656	CBWD3	-1.20071	-0.730905	587.865	5.93e-51	1.47355e-46
TCONS_00012635	RABEP1	-3.08686	1.29598	546.505	6.38264e-51	1.58596e-46
TCONS_00005823	IRF7	-1.16695	-1.50342	524.529	6.48215e-51	1.61062e-46
TCONS_00004197	XLOC_001310	-3.51981	1.51539	598.538	6.62338e-51	1.64564e-46
TCONS_00014458	C17orf58	0.493425	0.618395	490.743	7.1885e-51	1.78598e-46
TCONS_00014133	DHX58	-1.7417	-1.74856	782.125	8.48817e-51	2.10863e-46
TCONS_00018815	ITSN2	-0.297881	0.266643	712.776	8.83596e-51	2.19485e-46
TCONS_00003262	TMEM63A	-0.738313	-0.502437	587.21	9.01789e-51	2.23995e-46
TCONS_00011981	LUC7L	-1.32599	-0.915757	576.182	9.22301e-51	2.29081e-46
TCONS_00029917	CDK6	-3.08397	1.24639	565.314	9.65664e-51	2.39842e-46
TCONS_00029918	CDK6	3.08397	-1.24639	565.314	9.65664e-51	2.39842e-46
TCONS_00027915	DDX39B	-2.55116	1.02179	524.194	1.08209e-50	2.68726e-46
TCONS_00016639	STX10	-2.54757	0.907842	581.457	1.08958e-50	2.70575e-46
TCONS_00025442	GPBP1	-1.15792	0.431424	609.552	1.22858e-50	3.05081e-46
TCONS_00021719	USP41	-2.07371	1.98698	179.273	1.40874e-50	3.49803e-46
TCONS_00001385	BLZF1	-2.01574	0.767228	530.897	1.50744e-50	3.74283e-46
TCONS_00030736	FAM91A1	2.01504	0.393369	951.661	1.70509e-50	4.23341e-46
TCONS_00030738	FAM91A1	-2.01504	-0.393369	951.661	1.70509e-50	4.23341e-46
TCONS_00027668	WTAP	-2.63011	-1.31255	957.406	1.81957e-50	4.51727e-46
TCONS_00009353	MPP5	-2.27933	1.15226	399.593	1.93539e-50	4.80442e-46
TCONS_00008074	TMCC3	0.171081	-2.18527	353.588	1.95331e-50	4.84871e-46
TCONS_00019106	CD207	-1.40445	1.62897	138.268	2.08486e-50	5.17504e-46
TCONS_00019107	CD207	1.40445	-1.62897	138.268	2.08486e-50	5.17504e-46
TCONS_00096782_add	ZEB2-AS1	-0.440268	0.623917	418.164	2.1168e-50	5.2539e-46
TCONS_00011365	NDE1	0.681464	-0.417087	569.628	2.13896e-50	5.30869e-46
TCONS_00001376	TBX19	0.273504	-0.530462	473.3	2.17294e-50	5.3928e-46
TCONS_00010953	PARP6	-1.37946	-0.531694	702.744	3.24276e-50	8.04755e-46
TCONS_00020719	OSER1	-1.90185	-0.495383	857.44	3.89415e-50	9.66335e-46
TCONS_00020720	OSER1	1.90185	0.495383	857.44	3.89415e-50	9.66335e-46
TCONS_00001988	RERE	-1.4661	-0.888966	614.583	4.46393e-50	1.10763e-45
TCONS_00006609	TMPRSS13	-1.71783	-0.927185	678.442	4.51062e-50	1.11917e-45
TCONS_00005346	DPP3	-1.78122	-1.09726	681.005	5.21944e-50	1.29499e-45
TCONS_00015582	C19orf60	-0.477047	-0.905881	389.248	5.23139e-50	1.29791e-45
TCONS_00022648	PCNP	1.54476	-0.647083	507.342	5.56178e-50	1.37982e-45
TCONS_00022650	PCNP	-1.54476	0.647083	507.342	5.56178e-50	1.37982e-45
TCONS_00028443	BCLAF1	-3.05298	0.863424	743.146	6.95996e-50	1.72656e-45
TCONS_00023259	AZI2	-2.65834	0.856715	635.126	7.51769e-50	1.86484e-45
TCONS_00171125_add	ANKRD20A4	-1.75294	-1.06164	673.91	7.72903e-50	1.91711e-45
TCONS_00010708	GOLGA8B	-1.70634	-1.13622	656.691	8.14346e-50	2.01982e-45
TCONS_00001795	TSNAX-DISC1	2.45809	-0.861614	579.426	8.19033e-50	2.03137e-45
TCONS_00001796	TSNAX-DISC1	-2.45809	0.861614	579.426	8.19033e-50	2.03137e-45
TCONS_00004343	ZNF438	0.167089	-0.953287	294.688	1.02087e-49	2.53165e-45
TCONS_00019844	CDC25B	-2.31439	1.41708	306.689	1.09414e-49	2.71324e-45
TCONS_00021423	FBXO7	-1.70194	-0.388802	865.362	1.16653e-49	2.89265e-45
TCONS_00021428	FBXO7	1.70194	0.388802	865.362	1.16653e-49	2.89265e-45
TCONS_00029681	HERPUD2	0.592014	0.637202	491.811	1.21494e-49	3.01245e-45
TCONS_00014844	GALNT1	-1.71255	-0.546688	778.54	1.22535e-49	3.03813e-45
TCONS_00014855	GALNT1	1.71255	0.546688	778.54	1.22535e-49	3.03813e-45
TCONS_00015869	CCDC9	-2.99762	1.02089	640.266	1.29717e-49	3.21594e-45
TCONS_00013947	MYO18A	-3.31563	1.45481	550.485	1.3016e-49	3.2268e-45
TCONS_00017726	ZNF638	-0.0459833	0.867207	329.202	1.43893e-49	3.56711e-45
TCONS_00000546	DNAJC6	-2.64658	1.6647	320.975	1.49917e-49	3.7163e-45
TCONS_00027695	MAP3K4	-1.92363	1.19545	307.814	1.53279e-49	3.79949e-45
TCONS_00019850	PANK2	-0.960432	0.386225	620.093	1.66054e-49	4.11598e-45
TCONS_00019523	ORMDL1	0.378635	-0.649838	399.676	2.16818e-49	5.37406e-45
TCONS_00027110	SKIV2L	0.784273	-1.03967	248.037	2.1781e-49	5.39841e-45
TCONS_00027111	SKIV2L	-0.784273	1.03967	248.037	2.1781e-49	5.39841e-45
TCONS_00030449	SORBS3	-2.30179	1.47461	285.519	2.22714e-49	5.51953e-45
TCONS_00009707	SLC7A8	0.327447	-0.774457	344.075	2.29803e-49	5.69497e-45
TCONS_00029387	LUC7L2	0.426584	-0.251441	730.675	2.57778e-49	6.38774e-45
TCONS_00148886_add	NUDT3	-1.20158	1.8657	110.866	3.59275e-49	8.90212e-45
TCONS_00024570	FNIP2	0.265419	-0.582591	436.235	3.65933e-49	9.06673e-45
TCONS_00018901	PRKD3	-1.29422	0.732218	413.869	4.26866e-49	1.0576e-44
TCONS_00019564	SF3B1	-1.55784	-0.424238	801.372	4.35552e-49	1.07908e-44
TCONS_00030392	ERI1	2.4609	-1.31362	371.03	4.51812e-49	1.11932e-44
TCONS_00030393	ERI1	-2.4609	1.31362	371.03	4.51812e-49	1.11932e-44
TCONS_00025402	PTGER4	-2.14118	1.16366	359.042	4.69402e-49	1.1628e-44
TCONS_00029856	NCF1C	-1.59351	0.857922	393.218	4.73168e-49	1.17209e-44
TCONS_00029203	ORAI2	0.896858	1.17414	433.12	5.26568e-49	1.30426e-44
TCONS_00014006	SLFN12	-2.19082	-1.55097	858.381	5.56082e-49	1.3773e-44
TCONS_00018754	ITGB1BP1	0.348175	0.625066	458.891	5.58572e-49	1.38342e-44
TCONS_00024382	RAP1GDS1	0.218498	-0.388484	572.396	6.19286e-49	1.53372e-44
TCONS_00013121	STAT5A	-1.11808	0.902449	311.897	7.82016e-49	1.93666e-44
TCONS_00011939	XLOC_003833	-3.06901	1.60848	445.609	8.12988e-49	2.01328e-44
TCONS_00014817	RNMT	-0.781659	-1.25717	401.426	8.69618e-49	2.15343e-44
TCONS_00002506	GBP2	0.208059	0.358	616.389	8.76822e-49	2.17119e-44
TCONS_00002514	GBP2	-0.208059	-0.358	616.389	8.76822e-49	2.17119e-44
TCONS_00014463	C17orf58	-1.67591	-0.797701	683.203	1.17171e-48	2.90103e-44
TCONS_00146284_add	TRAF3IP2-AS1	-1.17007	-1.51199	522.594	1.50193e-48	3.71847e-44
TCONS_00016686	MED26	-0.193312	0.330075	626.582	1.5215e-48	3.76677e-44
TCONS_00016687	MED26	0.193312	-0.330075	626.582	1.5215e-48	3.76677e-44
TCONS_00002471	MCOLN2	-1.38934	-0.829165	598.617	1.59231e-48	3.94177e-44
TCONS_00011644	ITGAX	-1.17637	-0.448736	693.064	1.69255e-48	4.18956e-44
TCONS_00001985	RERE	-0.90997	0.874763	306.568	1.77375e-48	4.39038e-44
TCONS_00032297	CBWD5	-0.190014	-2.07187	432.657	2.8759e-48	7.11755e-44
TCONS_00001407	PRRC2C	-1.5528	-1.49546	635.339	4.42076e-48	1.09396e-43
TCONS_00025831	ANKHD1-EIF4EBP3	-2.16813	0.78976	540.405	4.54512e-48	1.12469e-43
TCONS_00023822	ISY1-RAB43	0.783614	-0.422891	560.55	5.86041e-48	1.44998e-43
TCONS_00004052	SFXN3	-2.10751	-0.588752	864.533	6.6818e-48	1.65314e-43
TCONS_00032204	DDX58	0.0185764	-0.532501	468.186	7.87601e-48	1.94845e-43
TCONS_00010526	AKAP13	-0.380885	-0.898299	364.913	7.98328e-48	1.9749e-43
TCONS_00024668	AFAP1	0.726823	-2.48601	406.779	8.00327e-48	1.97977e-43
TCONS_00031842	PALM2-AKAP2	-1.69311	-1.61566	716.315	8.28133e-48	2.04839e-43
TCONS_00171126_add	ANKRD20A4	-1.67092	-1.56288	690.76	8.28736e-48	2.0498e-43
TCONS_00029548	DNAJB6	-1.20754	-1.08307	511.747	9.42134e-48	2.32999e-43
TCONS_00025403	PTGER4	-0.0033765	-0.344283	612.366	9.80665e-48	2.42509e-43
TCONS_00027523	NCOA7	-0.896183	-1.90547	595.551	1.29913e-47	3.21248e-43
TCONS_00016623	TNPO2	0.305186	-1.00253	261.385	1.332e-47	3.29364e-43
TCONS_00009700	ACIN1	-1.37125	-0.478885	715.251	1.37869e-47	3.40895e-43
TCONS_00008049	CSRP2	-2.65757	1.42802	372.329	1.65384e-47	4.08912e-43
TCONS_00032198	DDX58	-1.36048	1.12949	243.202	1.67873e-47	4.15048e-43
TCONS_00026397	SRA1	-2.86075	1.42568	424.956	1.702e-47	4.20786e-43
TCONS_00011964	TCF25	-2.59287	0.728285	683.291	1.80237e-47	4.45582e-43
TCONS_00016341	TMEM259	-2.02126	-1.32913	753.682	1.80584e-47	4.46422e-43
TCONS_00005918	TRIM5	-0.636488	-0.697398	464.592	2.29737e-47	5.67909e-43
TCONS_00005919	TRIM5	0.636488	0.697398	464.592	2.29737e-47	5.67909e-43
TCONS_00007903	MMP19	-1.32925	1.35979	173.128	2.83175e-47	6.99952e-43
TCONS_00014035	TBC1D3G	-2.57747	1.59821	310.502	3.13651e-47	7.75251e-43
TCONS_00026137	IL6ST	-1.6384	0.776216	433.959	3.26148e-47	8.06108e-43
TCONS_00026138	IL6ST	1.6384	-0.776216	433.959	3.26148e-47	8.06108e-43
TCONS_00010196	SPRED1	-1.95074	0.449104	729.781	3.4565e-47	8.5424e-43
TCONS_00002915	ARHGEF11	-2.21225	-0.467094	947.139	3.76757e-47	9.31079e-43
TCONS_00027872	PPP1R18	-0.860072	0.408471	576.254	4.05587e-47	1.00229e-42
TCONS_00021599	L3MBTL2	-3.13231	1.55911	470.303	4.11906e-47	1.01786e-42
TCONS_00001373	TBX19	-0.851481	0.453812	536.134	4.54281e-47	1.12253e-42
TCONS_00023994	BCL6	-1.40756	-0.632344	651.808	4.75907e-47	1.17592e-42
TCONS_00002351	EFCAB14	-0.978835	-0.896707	477.583	4.76424e-47	1.17715e-42
TCONS_00157482_add	WDR60	-3.01558	1.56192	435.16	4.7737e-47	1.17944e-42
TCONS_00006237	EML3	-0.216473	-0.611309	440.535	4.93501e-47	1.21924e-42
TCONS_00006238	EML3	0.216473	0.611309	440.535	4.93501e-47	1.21924e-42
TCONS_00030927	TNFRSF10B	0.342671	-0.467668	499.156	5.06889e-47	1.25222e-42
TCONS_00007897	MMP19	-2.14856	0.61996	638.968	5.32367e-47	1.31511e-42
TCONS_00030248	EZH2	-2.31005	0.84694	536.502	5.67874e-47	1.40265e-42
TCONS_00058483_add	ST20	-0.779102	-1.33966	393.713	8.11737e-47	2.00491e-42
TCONS_00029998	LRCH4	-1.01711	-0.325017	746.621	8.73603e-47	2.15762e-42
TCONS_00020620	BCL2L1	-1.56184	-0.41294	798.277	8.78102e-47	2.16865e-42
TCONS_00026891	BTN2A1	-0.173657	0.8168	322.385	8.99933e-47	2.22247e-42
TCONS_00026893	BTN2A1	0.173657	-0.8168	322.385	8.99933e-47	2.22247e-42
TCONS_00029013	EIF4H	2.01332	-0.614158	609.628	9.36791e-47	2.31331e-42
TCONS_00029016	EIF4H	-2.01332	0.614158	609.628	9.36791e-47	2.31331e-42
TCONS_00009627	TMEM55B	0.431013	-1.04334	239.066	1.23534e-46	3.05005e-42
TCONS_00009628	TMEM55B	-0.431013	1.04334	239.066	1.23534e-46	3.05005e-42
TCONS_00010160	CYFIP1	0.628141	-1.02444	238.542	1.28974e-46	3.18399e-42
TCONS_00022443	ATRIP	-0.0272329	-1.29217	241.97	1.30232e-46	3.21492e-42
TCONS_00014725	NDC80	1.97636	-1.91002	163.46	1.30406e-46	3.21908e-42
TCONS_00014726	NDC80	-1.97636	1.91002	163.46	1.30406e-46	3.21908e-42
TCONS_00009388	PCNX	-0.911412	0.665375	396.643	1.50589e-46	3.717e-42
TCONS_00006726	WNK1	-0.20457	-0.508264	492.642	1.59417e-46	3.93472e-42
TCONS_00057278_add	PATL2	-0.0630581	0.508123	474.272	1.65894e-46	4.09443e-42
TCONS_00021185	RUNX1	-3.14822	1.35628	523.177	1.80286e-46	4.44928e-42
TCONS_00027475	GTF3C6	-0.248557	-0.572425	460.459	1.81149e-46	4.4704e-42
TCONS_00027478	GTF3C6	0.248557	0.572425	460.459	1.81149e-46	4.4704e-42
TCONS_00012202	XPO6	-0.856754	-0.439111	624.556	2.60804e-46	6.43559e-42
TCONS_00003063	TOR1AIP2	0.0591132	0.420646	540.802	3.11521e-46	7.68678e-42
TCONS_00003065	TOR1AIP2	-0.0591132	-0.420646	540.802	3.11521e-46	7.68678e-42
TCONS_00033491	IQSEC2	-1.85416	-1.07391	688.161	3.15513e-46	7.78466e-42
TCONS_00018241	SSFA2	0.924616	-0.716749	368.425	3.28788e-46	8.11185e-42
TCONS_00022447	ARIH2	0.42071	-0.696296	360.528	3.32123e-46	8.19381e-42
TCONS_00003558	OPTN	1.22149	-0.55935	495.565	3.48263e-46	8.59164e-42
TCONS_00003565	OPTN	-1.22149	0.55935	495.565	3.48263e-46	8.59164e-42
TCONS_00010477	ZFAND6	0.42276	0.502544	517.506	4.06005e-46	1.00153e-41
TCONS_00023191	RAF1	-2.48097	0.471341	840.785	4.1879e-46	1.03303e-41
TCONS_00029546	DNAJB6	-0.29008	0.615865	401.799	4.61174e-46	1.13749e-41
TCONS_00005019	DGKZ	-2.23161	1.67016	219.19	4.66429e-46	1.1504e-41
TCONS_00151012_add	CAHM	-2.12144	1.16934	337.88	5.32222e-46	1.31262e-41
TCONS_00009863	MAX	-0.58508	-0.490537	546.035	5.54451e-46	1.36739e-41
TCONS_00026370	FAM13B	-2.54827	0.881973	572.159	6.37246e-46	1.57151e-41
TCONS_00017682	AFTPH	-1.73748	-1.01678	655.727	6.39086e-46	1.57599e-41
TCONS_00008851	EPSTI1	0.449772	0.204464	808.218	6.73736e-46	1.6613e-41
TCONS_00027381	OGFRL1	-0.543302	-0.881872	386.057	8.25561e-46	2.03559e-41
TCONS_00002980	PFDN2	0.170977	0.539768	467.304	8.47876e-46	2.09052e-41
TCONS_00001001	INTS3	-2.18155	-0.631195	860.855	8.69691e-46	2.14422e-41
TCONS_00001010	INTS3	2.18155	0.631195	860.855	8.69691e-46	2.14422e-41
TCONS_00009704	SLC7A8	-1.23647	0.923646	298.909	8.87939e-46	2.18904e-41
TCONS_00002631	ZNF697	2.06317	-1.04098	378.278	9.46632e-46	2.33364e-41
TCONS_00002632	ZNF697	-2.06317	1.04098	378.278	9.46632e-46	2.33364e-41
TCONS_00002705	ENSA	-1.35715	0.419503	627.177	1.03452e-45	2.5501e-41
TCONS_00002706	ENSA	1.35715	-0.419503	627.177	1.03452e-45	2.5501e-41
TCONS_00001446	CEP350	-0.815859	-1.56632	427.338	1.30969e-45	3.22812e-41
TCONS_00025356	IL7R	0.493111	0.783981	402.96	1.35759e-45	3.34606e-41
TCONS_00025357	IL7R	-0.493111	-0.783981	402.96	1.35759e-45	3.34606e-41
TCONS_00001211	CADM3	0.760473	-1.73127	126.138	1.59402e-45	3.92847e-41
TCONS_00001212	CADM3	-0.760473	1.73127	126.138	1.59402e-45	3.92847e-41
TCONS_00033339	SLC6A8	2.26566	-1.38079	289.923	1.66308e-45	4.09832e-41
TCONS_00033340	SLC6A8	-2.26566	1.38079	289.923	1.66308e-45	4.09832e-41
TCONS_00014376	LOC645638	1.08122	-0.436832	568.284	1.7535e-45	4.32081e-41
TCONS_00014377	LOC645638	-1.08122	0.436832	568.284	1.7535e-45	4.32081e-41
TCONS_00166471_add	PSD3	-1.37244	1.11489	239.019	1.86086e-45	4.58479e-41
TCONS_00018112	HNMT	-1.01206	0.59826	440.165	1.87277e-45	4.61394e-41
TCONS_00024632	GAK	-1.24464	-1.19216	507.325	2.08233e-45	5.13002e-41
TCONS_00032105	PLGRKT	0.499309	-0.540351	443.233	2.181e-45	5.3729e-41
TCONS_00006165	PATL1	-1.7118	-0.570908	746.677	2.21468e-45	5.45564e-41
TCONS_00024955	UBE2D3	-0.265838	-0.35847	603.208	2.22042e-45	5.46956e-41
TCONS_00024957	UBE2D3	0.265838	0.35847	603.208	2.22042e-45	5.46956e-41
TCONS_00000384	THRAP3	0.145317	-0.649742	385.858	2.33693e-45	5.75563e-41
TCONS_00178607_add	ASMTL-AS1	-0.101082	0.755298	342.246	2.80777e-45	6.91471e-41
TCONS_00012188	ARHGAP17	-0.521334	-1.49686	336.943	2.91735e-45	7.18426e-41
TCONS_00006412	ARAP1	-1.46165	-0.854436	596.779	3.05467e-45	7.52213e-41
TCONS_00027967	PBX2	-2.10052	0.35116	857.219	3.26356e-45	8.03619e-41
TCONS_00027949	CLIC1	-1.51056	0.260337	838.069	3.32183e-45	8.17934e-41
TCONS_00003932	TSPAN14	-0.0251172	-0.591369	424.338	3.49651e-45	8.60877e-41
TCONS_00016643	CACNA1A	-2.28069	1.69589	227.583	4.15007e-45	1.02175e-40
TCONS_00013298	LUC7L3	-2.22591	1.01541	421.448	4.54456e-45	1.11883e-40
TCONS_00029945	SAMD9L	-2.88755	1.35702	445.171	4.58027e-45	1.12757e-40
TCONS_00004250	NUDT5	0.453104	0.711309	418.242	4.74261e-45	1.16749e-40
TCONS_00029654	XLOC_009272	0.321152	1.01246	317.308	4.88234e-45	1.20184e-40
TCONS_00028900	IKZF1	-1.42208	-1.01179	562.844	5.29757e-45	1.304e-40
TCONS_00011946	BANP	-2.78218	1.56443	367.946	6.43427e-45	1.58373e-40
TCONS_00022297	NR1D2	-1.76655	1.07737	303.401	6.67931e-45	1.64398e-40
TCONS_00022298	NR1D2	1.76655	-1.07737	303.401	6.67931e-45	1.64398e-40
TCONS_00025709	TNFAIP8	-0.75595	-0.501566	561.227	6.69045e-45	1.64659e-40
TCONS_00004407	ARHGAP22	-1.11744	-1.18704	471.219	7.06208e-45	1.73798e-40
TCONS_00002169	PUM1	-2.96875	1.16059	542.903	7.64438e-45	1.88121e-40
TCONS_00029492	NUB1	-1.47313	0.821306	371.02	7.79961e-45	1.91933e-40
TCONS_00029504	NUB1	1.47313	-0.821306	371.02	7.79961e-45	1.91933e-40
TCONS_00000230	SRRM1	-0.917724	-1.25294	419.348	7.83514e-45	1.92792e-40
TCONS_00031992	PPP2R4	-2.10753	0.510321	701.748	8.31202e-45	2.04517e-40
TCONS_00031993	PPP2R4	2.10753	-0.510321	701.748	8.31202e-45	2.04517e-40
TCONS_00003180	SLC26A9	-0.804974	1.48273	132.572	9.85235e-45	2.42397e-40
TCONS_00003181	SLC26A9	0.804974	-1.48273	132.572	9.85235e-45	2.42397e-40
TCONS_00008811	N4BP2L2	-1.65707	1.00149	315.887	1.0388e-44	2.55555e-40
TCONS_00003777	HNRNPH3	-1.64479	0.506438	600.241	1.06563e-44	2.62134e-40
TCONS_00001444	CEP350	-1.6381	0.525998	583.333	1.08777e-44	2.67569e-40
TCONS_00016638	STX10	-2.71858	1.6541	351.528	1.09573e-44	2.69516e-40
TCONS_00017664	XLOC_005595	2.21018	-1.56197	228.822	1.15208e-44	2.83366e-40
TCONS_00017665	XLOC_005595	-2.21018	1.56197	228.822	1.15208e-44	2.83366e-40
TCONS_00006892	FGFR1OP2	-1.04572	0.530478	485.136	1.33066e-44	3.27263e-40
TCONS_00022660	NFKBIZ	-0.596773	1.49238	143.883	1.59045e-44	3.91091e-40
TCONS_00007716	ITPR2	1.37107	0.798628	580.584	1.99993e-44	4.91764e-40
TCONS_00007717	ITPR2	-1.37107	-0.798628	580.584	1.99993e-44	4.91764e-40
TCONS_00030751	TRIB1	-1.90136	-0.90229	708.78	2.41773e-44	5.94447e-40
TCONS_00032314	XLOC_010171	-0.979014	2.6143	646.717	2.51924e-44	6.19354e-40
TCONS_00015606	ZNF101	-0.833274	0.654583	384.967	2.72339e-44	6.69519e-40
TCONS_00015607	ZNF101	0.833274	-0.654583	384.967	2.72339e-44	6.69519e-40
TCONS_00007297	TMPO	0.0307049	-0.369486	569.369	2.79733e-44	6.87639e-40
TCONS_00027824	FAM65B	-1.53885	-1.70132	723.827	2.86475e-44	7.04184e-40
TCONS_00012317	BRD7	0.734293	-0.562099	433.305	3.39427e-44	8.34279e-40
TCONS_00008692	UBAC2	-1.54186	0.985993	302.319	3.44099e-44	8.45726e-40
TCONS_00031648	ANKRD20A3	-2.68313	1.09115	493.314	3.91042e-44	9.61065e-40
TCONS_00029179	SLC12A9	0.4787	-1.66069	152.004	3.95995e-44	9.73198e-40
TCONS_00009895	SYNJ2BP-COX16	1.21131	0.269505	829.067	4.24374e-44	1.0429e-39
TCONS_00009896	SYNJ2BP-COX16	-1.21131	-0.269505	829.067	4.24374e-44	1.0429e-39
TCONS_00032296	CBWD5	-1.59678	1.30529	196.602	4.60751e-44	1.13216e-39
TCONS_00005081	TMX2-CTNND1	-0.643142	0.411865	538.878	5.47246e-44	1.34464e-39
TCONS_00004051	SFXN3	0.51437	0.625942	455.825	5.51639e-44	1.35538e-39
TCONS_00022440	ATRIP	-1.58722	1.24249	213.896	5.62162e-44	1.38118e-39
TCONS_00028284	HMGN3	-0.407696	-0.288868	679.259	5.82126e-44	1.43017e-39
TCONS_00017981	IL1RN	-0.657415	-0.353294	645.472	6.00291e-44	1.47467e-39
TCONS_00017986	IL1RN	0.657415	0.353294	645.472	6.00291e-44	1.47467e-39
TCONS_00029534	RBM33	-1.2332	0.539836	499.164	6.44529e-44	1.58322e-39
TCONS_00011825	NFATC3	-1.93251	-0.930371	712.401	6.64478e-44	1.63216e-39
TCONS_00012168	LOC23117	-1.11022	0.551577	474.105	7.00654e-44	1.72088e-39
TCONS_00030210	PARP12	-2.26894	0.43393	806.719	7.08259e-44	1.73948e-39
TCONS_00023214	SH3BP5	-1.05691	-1.33188	455.851	7.51873e-44	1.84652e-39
TCONS_00023215	SH3BP5	1.05691	1.33188	455.851	7.51873e-44	1.84652e-39
TCONS_00131121_add	GUCY1A3	-2.29141	1.29736	315.2	7.6296e-44	1.8736e-39
TCONS_00023450	RASSF1	-0.490827	-0.767164	398.701	7.83744e-44	1.92456e-39
TCONS_00013359	TLK2	0.518032	0.338672	639.494	7.83976e-44	1.92505e-39
TCONS_00005288	EHBP1L1	-1.61117	-0.30061	886.461	8.33506e-44	2.04651e-39
TCONS_00007274	SOCS2	-1.9695	0.953892	388.81	8.56463e-44	2.10279e-39
TCONS_00018452	NRP2	-0.506312	-0.781513	396.078	1.04846e-43	2.57387e-39
TCONS_00033170	XLOC_010457	-0.327774	-1.26567	282.264	1.24434e-43	3.05448e-39
TCONS_00028939	CCT6P3	-0.327947	-1.8004	360.952	1.32927e-43	3.26283e-39
TCONS_00079642_add	GREB1L	-2.66774	1.48748	347.285	1.38902e-43	3.40935e-39
TCONS_00004158	PTPRE	-1.51118	-0.590502	675.8	1.71228e-43	4.20261e-39
TCONS_00031894	TLR4	-2.4899	1.45861	309.311	1.74711e-43	4.28793e-39
TCONS_00000453	KDM4A	1.73265	-1.2816	218.361	1.77408e-43	4.35377e-39
TCONS_00004669	SH3PXD2A	-0.390711	-1.6017	317.33	2.05457e-43	5.04151e-39
TCONS_00017918	IL1R1	-1.99939	0.803086	470.536	2.06032e-43	5.0554e-39
TCONS_00013157	TMEM106A	-0.550749	-1.07923	339.926	2.48077e-43	6.08681e-39
TCONS_00000485	NASP	2.58118	-0.741253	650.184	2.60593e-43	6.39366e-39
TCONS_00000486	NASP	-2.58118	0.741253	650.184	2.60593e-43	6.39366e-39
TCONS_00002045	SDHB	-1.64469	1.31893	194.638	2.66935e-43	6.54872e-39
TCONS_00002046	SDHB	1.64469	-1.31893	194.638	2.66935e-43	6.54872e-39
TCONS_00002732	PI4KB	-2.47493	1.2922	355.725	2.6787e-43	6.57112e-39
TCONS_00006610	TMPRSS13	-1.18023	-0.795303	527.812	2.99045e-43	7.33556e-39
TCONS_00008075	TMCC3	-3.35529	1.4262	556.666	3.01927e-43	7.40598e-39
TCONS_00001015	SLC27A3	-2.84751	0.825889	672.03	3.10827e-43	7.62396e-39
TCONS_00001723	MIA3	-0.836327	0.492259	484.35	3.17823e-43	7.79525e-39
TCONS_00012731	ELP5	-2.03028	1.25657	273.918	3.40939e-43	8.36187e-39
TCONS_00014871_add	ERO1LB	-0.272181	-0.76837	363.192	3.63816e-43	8.92259e-39
TCONS_00017541	SLC4A1AP	-3.06626	1.47323	461.354	3.6504e-43	8.95223e-39
TCONS_00028977	POM121	-1.75581	-1.05705	646.418	3.75043e-43	9.19719e-39
TCONS_00007900	MMP19	-2.68479	0.605213	771.854	3.84519e-43	9.42878e-39
TCONS_00029687	ELMO1	0.84576	0.623466	509.094	4.31519e-43	1.05808e-38
TCONS_00029690	ELMO1	-0.84576	-0.623466	509.094	4.31519e-43	1.05808e-38
TCONS_00017611	PPM1B	0.583134	-0.292693	652.789	4.87457e-43	1.19515e-38
TCONS_00006221	FADS3	-0.45802	-0.855831	363.741	4.92544e-43	1.20757e-38
TCONS_00006222	FADS3	0.45802	0.855831	363.741	4.92544e-43	1.20757e-38
TCONS_00001908	NADK	-1.27485	-1.40213	524.964	5.10383e-43	1.2512e-38
TCONS_00001914	NADK	1.27485	1.40213	524.964	5.10383e-43	1.2512e-38
TCONS_00019490	WIPF1	-1.43405	-0.457106	718.761	5.81091e-43	1.42443e-38
TCONS_00157481_add	WDR60	-2.28124	1.37903	282.228	7.24044e-43	1.77463e-38
TCONS_00002866	ASH1L	-0.561226	1.32643	156.7	7.34779e-43	1.80072e-38
TCONS_00028404	GOPC	-2.06003	0.93203	413.161	7.40258e-43	1.81408e-38
TCONS_00010074	GPR132	-0.314055	0.640156	371.402	8.10047e-43	1.98502e-38
TCONS_00023998	BCL6	0.911419	-0.752872	331.121	8.85117e-43	2.16871e-38
TCONS_00018946	XLOC_005931	-0.933076	2.54998	644.128	9.07464e-43	2.22329e-38
TCONS_00023780	HSPBAP1	-2.4737	1.62827	282.735	1.06765e-42	2.61542e-38
TCONS_00023781	HSPBAP1	2.4737	-1.62827	282.735	1.06765e-42	2.61542e-38
TCONS_00027591	UTRN	-1.49272	1.06132	257.622	1.10376e-42	2.70366e-38
TCONS_00026880	BTN2A2	-0.339604	-0.971884	316.12	1.13321e-42	2.77569e-38
TCONS_00010923	SNAPC5	-0.349088	-0.818244	355.357	1.13448e-42	2.77868e-38
TCONS_00015840	CLASRP	-0.936739	0.691819	363.584	1.1547e-42	2.82809e-38
TCONS_00004964	HIPK3	-2.70468	0.770953	661.52	1.43297e-42	3.50934e-38
TCONS_00006817	CLEC2D	-1.80707	-1.10061	657.766	1.68275e-42	4.12072e-38
TCONS_00007869	CALCOCO1	-1.23564	-0.673735	571.718	1.73333e-42	4.2444e-38
TCONS_00027871	PPP1R18	0.119788	-0.285483	644.975	2.01472e-42	4.93304e-38
TCONS_00027446	PRDM1	-2.06941	0.720634	528.844	2.41251e-42	5.90582e-38
TCONS_00022432	ATRIP	-1.73262	-0.552296	744.105	2.46623e-42	6.03708e-38
TCONS_00028915	IKZF1	-1.09562	0.47993	517.181	2.53994e-42	6.21726e-38
TCONS_00019494	ATF2	-2.16188	-1.4367	816.973	2.7742e-42	6.79041e-38
TCONS_00017545	BRE	-2.83995	0.729004	724.744	3.06308e-42	7.4972e-38
TCONS_00017546	BRE	2.83995	-0.729004	724.744	3.06308e-42	7.4972e-38
TCONS_00021369	HSCB	-2.77159	1.10469	500.885	3.14388e-42	7.69433e-38
TCONS_00018488	RPE	-2.63854	0.570273	780.563	3.19307e-42	7.8144e-38
TCONS_00018489	RPE	2.63854	-0.570273	780.563	3.19307e-42	7.8144e-38
TCONS_00007810	FMNL3	0.619485	0.265711	721.527	3.21643e-42	7.87092e-38
TCONS_00027376	FAM135A	-1.79406	-0.976009	658.719	3.28529e-42	8.03909e-38
TCONS_00002384	YIPF1	-0.965355	-1.07951	426.038	3.51626e-42	8.60357e-38
TCONS_00019524	ORMDL1	-1.26071	0.515841	511.134	4.15231e-42	1.01595e-37
TCONS_00055112_add	ANKDD1A	-0.933008	-0.404691	639.875	4.36313e-42	1.06748e-37
TCONS_00012306	DNAJA2	-0.0215169	-0.279589	653.491	4.43444e-42	1.08489e-37
TCONS_00012307	DNAJA2	0.0215169	0.279589	653.491	4.43444e-42	1.08489e-37
TCONS_00021514	GTPBP1	-1.5956	-0.954065	603.125	4.45372e-42	1.08951e-37
TCONS_00125853_add	ATR	-0.0723454	-0.399116	536.433	4.60337e-42	1.12608e-37
TCONS_00012575	DPH1	-2.38017	1.34355	310.995	5.204e-42	1.2728e-37
TCONS_00001768	ADCK3	-1.78536	0.763824	440.672	5.22892e-42	1.27884e-37
TCONS_00025010	ELF2	-1.51278	-1.22796	571.841	5.4013e-42	1.32094e-37
TCONS_00000713	STRIP1	-2.08306	-0.600357	822.22	6.07972e-42	1.48674e-37
TCONS_00000716	STRIP1	2.08306	0.600357	822.22	6.07972e-42	1.48674e-37
TCONS_00011929	GSE1	-1.34603	0.685101	410.096	6.36146e-42	1.5555e-37
TCONS_00103767_add	PAX3	-2.60306	1.55827	320.988	7.99491e-42	1.95484e-37
TCONS_00033044	MAOA	0.805013	-0.339094	611.128	8.14276e-42	1.9909e-37
TCONS_00025833	ANKHD1-EIF4EBP3	-2.11071	-0.853169	766.234	8.2213e-42	2.01003e-37
TCONS_00029356	AHCYL2	-2.94387	1.17464	515.179	8.58753e-42	2.09931e-37
TCONS_00006561	CASP1	-1.45574	0.477145	572.426	8.81804e-42	2.15557e-37
TCONS_00019577	CLK1	-0.983693	0.642255	390.43	9.58587e-42	2.34307e-37
TCONS_00003380	MIR3916	0.624456	-0.490312	462.704	9.68148e-42	2.36635e-37
TCONS_00030054	ATXN7L1	-1.54559	0.755291	400.105	1.0934e-41	2.67226e-37
TCONS_00027498	FAM26F	-3.02555	0.908792	667.117	1.30108e-41	3.17957e-37
TCONS_00018583	SGPP2	-2.65194	1.21946	418.163	1.32928e-41	3.24836e-37
TCONS_00008489	XLOC_002712	-0.985843	0.904918	262.836	1.36614e-41	3.33831e-37
TCONS_00006410	ARAP1	-3.1751	1.34123	519.404	1.41057e-41	3.44658e-37
TCONS_00026251	MCTP1	-1.72791	0.491616	611.771	1.91068e-41	4.66798e-37
TCONS_00024536	ARHGAP10	-2.16803	0.445833	755.421	2.18008e-41	5.32573e-37
TCONS_00024537	ARHGAP10	2.16803	-0.445833	755.421	2.18008e-41	5.32573e-37
TCONS_00008690	UBAC2	-1.49184	-0.666622	631.666	2.49165e-41	6.08611e-37
TCONS_00007724	TMTC1	0.423517	-0.42985	499.145	2.5015e-41	6.10993e-37
TCONS_00007725	TMTC1	-0.423517	0.42985	499.145	2.5015e-41	6.10993e-37
TCONS_00012326	AMFR	0.77226	-0.820913	284.402	2.69139e-41	6.57319e-37
TCONS_00029045	GTF2I	-1.97775	-1.16014	706.489	2.74183e-41	6.69609e-37
TCONS_00031865	RGS3	1.31556	-1.63481	97.158	3.98595e-41	9.7333e-37
TCONS_00031866	RGS3	-1.31556	1.63481	97.158	3.98595e-41	9.7333e-37
TCONS_00029047	GTF2I	-1.29567	0.473467	544.473	4.27624e-41	1.04413e-36
TCONS_00027749	PXDC1	-2.17525	0.824241	485.529	4.52254e-41	1.10418e-36
TCONS_00027750	PXDC1	2.17525	-0.824241	485.529	4.52254e-41	1.10418e-36
TCONS_00000165	SZRD1	-1.4916	-1.286	568.001	5.10939e-41	1.24725e-36
TCONS_00028792	BC043356	-1.30098	0.56034	478.359	5.35063e-41	1.30609e-36
TCONS_00028808	BC043356	1.30098	-0.56034	478.359	5.35063e-41	1.30609e-36
TCONS_00170403_add	CDKN2B-AS1	0.832013	-0.994773	219.5	5.90794e-41	1.44189e-36
TCONS_00002124	C1orf63	-1.23478	0.698214	381.804	6.09751e-41	1.48804e-36
TCONS_00011084	RHCG	-2.14222	1.67136	201.157	6.61677e-41	1.61469e-36
TCONS_00010799	ATP8B4	1.20946	-1.21301	170.648	7.00918e-41	1.71038e-36
TCONS_00003643	WAC	-1.51801	-0.530346	689.376	7.31293e-41	1.78443e-36
TCONS_00001863	HES4	-1.90055	1.6501	151.827	8.10442e-41	1.9774e-36
TCONS_00148883_add	NUDT3	0.544094	-1.61037	131.575	8.80953e-41	2.14935e-36
TCONS_00031950	SLC25A25	-1.60349	-0.767569	630.32	9.30188e-41	2.26938e-36
TCONS_00028446	MAP7	0.377026	-1.80454	182.785	1.02646e-40	2.50414e-36
TCONS_00008256	VPS33A	0.116319	0.336735	587.375	1.11494e-40	2.71979e-36
TCONS_00002111	SRSF10	0.278399	0.346907	589.169	1.13719e-40	2.77395e-36
TCONS_00013130	NAGLU	2.0739	0.724324	774.903	1.15086e-40	2.80718e-36
TCONS_00013131	NAGLU	-2.0739	-0.724324	774.903	1.15086e-40	2.80718e-36
TCONS_00024569	FNIP2	-1.9212	0.513814	631.448	1.25296e-40	3.05585e-36
TCONS_00021689	BID	-2.72398	0.766383	658.832	1.34341e-40	3.27618e-36
TCONS_00021690	BID	2.72398	-0.766383	658.832	1.34341e-40	3.27618e-36
TCONS_00025934	MAT2B	-0.38113	0.304505	614.87	1.38829e-40	3.38535e-36
TCONS_00015062	FECH	-2.31038	1.51949	248.587	1.48739e-40	3.6267e-36
TCONS_00015063	FECH	2.31038	-1.51949	248.587	1.48739e-40	3.6267e-36
TCONS_00030453	SORBS3	-1.96374	1.30583	231.98	1.93371e-40	4.71438e-36
TCONS_00028472	HIVEP2	-2.36198	0.985198	442.648	2.04022e-40	4.97386e-36
TCONS_00003763	DKK1	-0.901706	2.45675	636.757	2.14585e-40	5.23115e-36
TCONS_00146974_add	TIAM2	-1.53577	-1.19238	570.677	2.64021e-40	6.43603e-36
TCONS_00031100	STAU2	-0.209724	0.620491	370.029	2.77938e-40	6.77502e-36
TCONS_00025413	ZNF131	-1.18541	0.912255	268.422	3.04724e-40	7.42766e-36
TCONS_00024863	ANTXR2	-1.94115	-1.03594	689.984	3.05671e-40	7.45013e-36
TCONS_00013252	SNX11	0.582968	-0.80727	279.542	3.14512e-40	7.66529e-36
TCONS_00004928	HTATIP2	-0.0803651	-0.765975	325.798	3.39908e-40	8.28356e-36
TCONS_00017920	IL1R1	-2.22545	0.984615	409.67	3.41282e-40	8.31669e-36
TCONS_00012462	CMC2	-0.0171362	0.484478	457.614	3.44918e-40	8.40497e-36
TCONS_00002125	C1orf63	-0.707511	-0.552762	499.739	3.67008e-40	8.94252e-36
TCONS_00011004	SNUPN	-1.77595	-0.935428	647.156	4.26377e-40	1.03887e-35
TCONS_00157480_add	WDR60	-0.52678	-1.51597	332.077	4.39175e-40	1.06996e-35
TCONS_00017666	REL	0.279649	0.898937	309.479	4.39469e-40	1.07063e-35
TCONS_00017667	REL	-0.279649	-0.898937	309.479	4.39469e-40	1.07063e-35
TCONS_00129169_add	TRMT44	-0.813505	-0.697992	458.398	4.44182e-40	1.08203e-35
TCONS_00025239	BC016366	-1.07775	-1.07353	444.381	4.665e-40	1.1363e-35
TCONS_00014429	ERN1	-2.03002	0.603333	584.861	4.79544e-40	1.16803e-35
TCONS_00004338	SVIL	-0.615804	-0.89479	366.352	4.856e-40	1.18273e-35
TCONS_00029369	TMEM140	0.936933	-1.87566	112.087	4.97151e-40	1.21081e-35
TCONS_00005951	ZBED5	-1.36124	0.526437	506.691	5.76027e-40	1.40286e-35
TCONS_00006580	IL18	3.21641	-1.33328	529.753	5.91817e-40	1.44125e-35
TCONS_00006581	IL18	-3.21641	1.33328	529.753	5.91817e-40	1.44125e-35
TCONS_00026584	HK3	-0.455047	-0.459462	514.53	6.9903e-40	1.70221e-35
TCONS_00032702	RALGDS	-1.6867	-0.467864	759.471	7.59423e-40	1.8492e-35
TCONS_00001404	PRRC2C	-0.601945	0.74154	305.734	8.34504e-40	2.03168e-35
TCONS_00032049	PHPT1	-0.294845	-0.863777	318.893	9.20117e-40	2.24002e-35
TCONS_00001451	QSOX1	2.22738	-0.354878	855.508	1.07256e-39	2.61082e-35
TCONS_00001452	QSOX1	-2.22738	0.354878	855.508	1.07256e-39	2.61082e-35
TCONS_00012198	XPO6	-2.40637	0.536207	728.789	1.36971e-39	3.33388e-35
TCONS_00014234_add	GPATCH2	-0.860187	-0.488879	557.594	1.44104e-39	3.50734e-35
TCONS_00032649	SH3GLB2	0.429791	0.539071	461.566	1.56819e-39	3.81665e-35
TCONS_00032650	SH3GLB2	-0.429791	-0.539071	461.566	1.56819e-39	3.81665e-35
TCONS_00000532	XLOC_000182	-2.10867	1.26281	268.227	1.62934e-39	3.96517e-35
TCONS_00015329	C19orf66	-1.79269	0.442031	658.044	1.79375e-39	4.36474e-35
TCONS_00000789	SRGAP2D	-1.84335	1.38884	184.023	1.83762e-39	4.4713e-35
TCONS_00026583	HK3	-1.58227	0.736452	403.146	2.7607e-39	6.71707e-35
TCONS_00032066	C9orf142	0.4369	0.770982	363.945	2.99606e-39	7.28911e-35
TCONS_00032067	C9orf142	-0.4369	-0.770982	363.945	2.99606e-39	7.28911e-35
TCONS_00024813	ANKRD17	-0.692093	-0.729266	420.282	3.02668e-39	7.36301e-35
TCONS_00010895	HERC1	-1.40072	-1.22633	529.932	3.04772e-39	7.41387e-35
TCONS_00032103	PLGRKT	-1.11685	0.578515	429.872	3.82176e-39	9.29605e-35
TCONS_00008701	TNFSF13B	1.04238	0.537983	564.854	3.91587e-39	9.52458e-35
TCONS_00008702	TNFSF13B	-1.04238	-0.537983	564.854	3.91587e-39	9.52458e-35
TCONS_00031880	C9orf91	-0.872576	1.72931	99.4798	3.95107e-39	9.6094e-35
TCONS_00023277	TRANK1	-2.15048	-1.17193	754.517	4.0557e-39	9.86346e-35
TCONS_00001027	SLC27A3	-1.60987	-0.688714	643.805	4.07746e-39	9.91598e-35
TCONS_00027780	ATXN1	-1.11269	-0.790369	490.397	4.70736e-39	1.14474e-34
TCONS_00024748	TLR6	0.453789	-1.41627	138.169	4.9173e-39	1.19574e-34
TCONS_00015453	CD97	-1.19996	0.670823	381.935	5.14811e-39	1.25181e-34
TCONS_00031810	MSANTD3	-1.7061	1.75633	121.415	5.19936e-39	1.26422e-34
TCONS_00026632	HNRNPH1	-1.81752	0.505295	605.568	5.53106e-39	1.34477e-34
TCONS_00032098	CBWD1	-1.42563	-0.850944	555.488	6.01207e-39	1.46159e-34
TCONS_00031872	ZNF618	-2.59065	1.26937	372.024	6.33573e-39	1.54022e-34
TCONS_00004456	SAR1A	-1.06485	0.49881	478.768	7.1465e-39	1.7371e-34
TCONS_00011407	LOC23117	-1.16874	-0.991607	468.116	8.65014e-39	2.10242e-34
TCONS_00009557	PPP2R5C	-1.26692	-0.457637	655.213	9.57171e-39	2.32593e-34
TCONS_00031639	FAM95B1	-0.553844	-0.615506	437.095	9.8775e-39	2.40013e-34
TCONS_00010076	GPR132	-1.49979	-1.18241	553.996	9.95325e-39	2.41844e-34
TCONS_00007097	RAB5B	-1.34929	1.05258	221.303	1.24266e-38	3.01929e-34
TCONS_00006834	ETV6	-1.25243	1.61766	87.9558	1.29014e-38	3.13452e-34
TCONS_00033045	MAOA	-2.01876	0.266789	908.787	1.29411e-38	3.14404e-34
TCONS_00007901	MMP19	-2.05833	0.53206	637.25	1.31371e-38	3.19153e-34
TCONS_00018756	ITGB1BP1	-1.73555	-0.732419	663.43	1.39843e-38	3.39721e-34
TCONS_00022427	ZNF589	-1.8924	0.907687	366.471	1.44983e-38	3.52178e-34
TCONS_00017937	LIMS1	-1.41209	-0.568703	632.324	1.46914e-38	3.56854e-34
TCONS_00027614	PCMT1	0.673653	0.320046	647.883	1.76697e-38	4.29108e-34
TCONS_00027615	PCMT1	-0.673653	-0.320046	647.883	1.76697e-38	4.29108e-34
TCONS_00010326	RNF111	2.1039	-0.317884	860.388	1.81996e-38	4.41941e-34
TCONS_00010330	RNF111	-2.1039	0.317884	860.388	1.81996e-38	4.41941e-34
TCONS_00032153	IFNA13	-0.800589	2.36953	637.306	1.84599e-38	4.48224e-34
TCONS_00032342	FRMD3	-2.24632	1.58849	231.936	1.85893e-38	4.51329e-34
TCONS_00022354	CTNNB1	-0.292445	0.301489	603.252	2.23929e-38	5.43654e-34
TCONS_00022357	CTNNB1	0.292445	-0.301489	603.252	2.23929e-38	5.43654e-34
TCONS_00011071	HAPLN3	-1.54915	-0.525323	685.424	2.26067e-38	5.488e-34
TCONS_00029842	RFC2	1.1186	-0.930385	244.068	2.3105e-38	5.60828e-34
TCONS_00027792	NUP153	-0.93654	-0.499954	558.531	2.50449e-38	6.0789e-34
TCONS_00012675	XAF1	0.814285	-0.449349	487.936	2.67265e-38	6.4868e-34
TCONS_00026180	NAIP	0.0196425	-0.91479	258.22	3.08868e-38	7.49562e-34
TCONS_00030425	NAT1	-2.81823	1.01766	532.939	3.18109e-38	7.71955e-34
TCONS_00017677	UGP2	-0.859588	-0.696888	457.265	3.20772e-38	7.78385e-34
TCONS_00017679	UGP2	0.859588	0.696888	457.265	3.20772e-38	7.78385e-34
TCONS_00023927	PDCD10	-0.415208	0.379689	524.338	3.21918e-38	7.81103e-34
TCONS_00023928	PDCD10	0.415208	-0.379689	524.338	3.21918e-38	7.81103e-34
TCONS_00004341	SVIL	-1.92934	-0.917815	684.796	3.34612e-38	8.11837e-34
TCONS_00023000	TTC14	-0.619147	-0.572059	464.086	3.59495e-38	8.7217e-34
TCONS_00023001	TTC14	0.619147	0.572059	464.086	3.59495e-38	8.7217e-34
TCONS_00023686	CBLB	-1.266	-0.62862	570.514	3.76549e-38	9.1347e-34
TCONS_00011020	PEAK1	-1.94584	0.859297	399.041	3.99525e-38	9.69169e-34
TCONS_00008250	KDM2B	0.394721	-0.780089	279.458	4.09062e-38	9.92262e-34
TCONS_00032544	PHF19	-0.930607	0.457255	491.354	4.68438e-38	1.1361e-33
[truncated: 13,755 more rows]

## Sheet: IFNB1 vs Baseline
Transcript	Gene	Intercept	Beta	logLikelihood	pValue	FDR
TCONS_00017804	VAMP5	0.576295	-3.09373	684.726	1.15151e-242	3.6032e-238
TCONS_00001419	RABGAP1L	-4.21572	2.96411	762.583	7.99792e-207	2.50255e-202
TCONS_00004538	LIPA	-4.18746	2.90541	747.44	2.26182e-197	7.07655e-193
TCONS_00017805	VAMP5	-3.04384	3.54975	431.051	2.59651e-179	8.12346e-175
TCONS_00001414	RABGAP1L	-0.110434	-2.47349	618.537	2.62687e-179	8.21817e-175
TCONS_00027526	NCOA7	-3.78886	3.28482	549.718	1.32483e-177	4.14459e-173
TCONS_00001417	RABGAP1L	-3.45353	3.58921	465.89	3.8533e-177	1.20543e-172
TCONS_00011537	MVP	-1.48071	-1.00624	940.873	2.4472e-174	7.65533e-170
TCONS_00011543	MVP	1.48071	1.00624	940.873	2.4472e-174	7.65533e-170
TCONS_00021260	BCL2L13	0.722052	-1.91618	484.101	1.87233e-173	5.85663e-169
TCONS_00021262	BCL2L13	-0.722052	1.91618	484.101	1.87233e-173	5.85663e-169
TCONS_00009215	KIAA0391	-4.26392	2.5686	792.73	5.42135e-173	1.69569e-168
TCONS_00027525	NCOA7	-3.11746	2.96459	464.425	3.41524e-169	1.06818e-164
TCONS_00014131	DHX58	-1.08028	-3.034	893.828	1.75138e-167	5.47761e-163
TCONS_00029232	HBP1	-3.90774	2.78742	634.75	1.78807e-165	5.59218e-161
TCONS_00001989	RERE	-0.907031	-1.87088	732.426	9.50469e-165	2.9725e-160
TCONS_00018687	UBE2F-SCLY	1.78895	1.57799	958.371	8.23555e-164	2.5755e-159
TCONS_00018692	UBE2F-SCLY	-1.78895	-1.57799	958.371	8.23555e-164	2.5755e-159
TCONS_00014978	OSBPL1A	-2.44739	2.51489	417.731	4.55093e-159	1.42312e-154
TCONS_00014078	JUP	-4.19377	2.12897	856.851	1.85667e-155	5.80579e-151
TCONS_00029675	NT5C3A	-0.277766	-3.16603	684.633	4.38076e-154	1.36982e-149
TCONS_00000297	PHACTR4	0.642138	-2.61866	438.369	1.29779e-152	4.05793e-148
TCONS_00032431	TRIM14	-1.03017	2.45646	387.898	4.41796e-151	1.38136e-146
TCONS_00032437	TRIM14	1.03017	-2.45646	387.898	4.41796e-151	1.38136e-146
TCONS_00011344	RMI2	-3.1939	2.40228	526.072	1.27639e-149	3.99064e-145
TCONS_00031231	EXT1	2.90406	-3.43338	360.432	7.78443e-148	2.43372e-143
TCONS_00014128	DHX58	-0.366744	-2.53171	606.443	1.60712e-147	5.02433e-143
TCONS_00018235	MIR548N	-1.32302	1.42248	477.427	1.58215e-145	4.94612e-141
TCONS_00017801	VAMP5	-3.31699	2.00507	638.992	1.24783e-144	3.90083e-140
TCONS_00001383	BLZF1	-3.94947	2.32242	701.084	5.87399e-142	1.83621e-137
TCONS_00021702	HIRA	-0.702082	-1.22583	643.849	3.33762e-138	1.04327e-133
TCONS_00029720	C7orf25	-4.10468	2.0288	816.626	4.28823e-137	1.34037e-132
TCONS_00029721	C7orf25	4.10468	-2.0288	816.626	4.28823e-137	1.34037e-132
TCONS_00011544	TMEM219	-2.26626	1.09712	689.793	5.71151e-137	1.78513e-132
TCONS_00024108	SH3BP2	-2.84678	2.94179	353.703	2.10591e-134	6.58182e-130
TCONS_00021174	GART	-3.62078	2.32728	597.556	8.35366e-134	2.61077e-129
TCONS_00028980	FKBP6	-1.55237	-2.27087	855.261	7.63956e-133	2.38752e-128
TCONS_00021499	SH3BP1	-1.19328	-1.22738	730.136	3.5329e-130	1.10407e-125
TCONS_00020833	ZBP1	-3.17096	3.03507	382.416	3.80243e-130	1.18826e-125
TCONS_00003084	FAM129A	1.81379	-3.2812	309.912	1.04945e-129	3.27943e-125
TCONS_00003085	FAM129A	-1.81379	3.2812	309.912	1.04945e-129	3.27943e-125
TCONS_00030197	ZC3HAV1	1.23703	-1.60695	392.234	5.74351e-129	1.79467e-124
TCONS_00028984	FKBP6	-0.513584	-2.86071	654.775	7.46183e-129	2.33152e-124
TCONS_00030323	PRKAG2	-0.792004	-1.22553	633.194	1.84577e-127	5.76711e-123
TCONS_00001722	MIA3	-0.463466	1.31792	448.145	2.05129e-127	6.40904e-123
TCONS_00024214	TBC1D1	-2.24915	2.40604	329.484	2.23976e-126	6.99768e-122
TCONS_00001415	RABGAP1L	0.0125881	-1.63131	457.133	2.55168e-126	7.97195e-122
TCONS_00021550	GTPBP1	1.14862	-2.18845	322.018	9.30031e-126	2.90551e-121
TCONS_00029683	HERPUD2	-1.44471	-1.11296	791.087	1.19038e-125	3.71873e-121
TCONS_00032503	FKBP15	-1.38416	1.93673	337.535	3.39748e-125	1.06134e-120
TCONS_00024215	TBC1D1	1.74551	-2.41192	296.323	6.87699e-124	2.14823e-119
TCONS_00031237	EXT1	-3.94265	2.33879	651.016	9.78615e-124	3.0568e-119
TCONS_00010037	WARS	-0.043894	-2.00165	451.472	2.95232e-123	9.22157e-119
TCONS_00029672	NT5C3A	-1.2739	2.99326	317.411	7.72644e-122	2.41328e-117
TCONS_00000298	PHACTR4	-0.811071	2.42724	332.359	2.38584e-120	7.45146e-116
TCONS_00024409	CISD2	-2.90849	2.37028	404.368	1.06552e-119	3.32774e-115
TCONS_00008833	ELF1	1.32961	0.774417	806.083	1.47763e-119	4.61462e-115
TCONS_00008840	ELF1	-1.32961	-0.774417	806.083	1.47763e-119	4.61462e-115
TCONS_00028535	XLOC_008908	-3.19685	2.98782	375.655	5.89925e-119	1.84222e-114
TCONS_00018178	GCA	-3.4089	1.45521	769.581	4.01893e-117	1.25499e-112
TCONS_00030186	C7orf49	1.21444	-2.00388	308.295	5.85469e-117	1.82819e-112
TCONS_00014980	OSBPL1A	-1.40284	-1.14521	750.855	3.71418e-116	1.15975e-111
TCONS_00009213	KIAA0391	-1.71693	-0.879787	867.042	1.9196e-115	5.99375e-111
TCONS_00031568	ACO1	-2.16423	2.74085	267.868	2.85387e-115	8.91065e-111
TCONS_00031567	ACO1	0.438289	-3.26632	496.845	4.91845e-114	1.53564e-109
TCONS_00013282	KAT7	-3.08876	2.53822	394.19	8.28802e-114	2.5876e-109
TCONS_00007303	ACTR6	-3.52868	2.38354	514.283	2.02939e-113	6.33555e-109
TCONS_00096494_add	EPB41L5	-2.78509	2.47662	347.235	7.44479e-112	2.32411e-107
TCONS_00030312	PRKAG2	-1.92971	1.66203	380.803	1.92745e-110	6.01691e-106
TCONS_00001718	MIA3	-0.785566	-0.928749	627.401	7.32227e-110	2.28572e-105
TCONS_00018176	GCA	-3.69723	1.53365	794.393	1.84489e-108	5.75863e-104
TCONS_00013281	KAT7	3.02606	-2.51781	373.885	2.62668e-108	8.19865e-104
TCONS_00025171	DDX60L	-1.45161	-1.3063	726.828	1.54596e-107	4.82525e-103
TCONS_00013947	MYO18A	-3.66469	2.11775	596.105	1.55576e-107	4.8557e-103
TCONS_00002125	C1orf63	-0.708478	-1.37394	546.209	6.4806e-107	2.02253e-102
TCONS_00031849	PALM2-AKAP2	-2.4779	2.7277	267.815	2.2822e-105	7.1223e-101
TCONS_00014982	OSBPL1A	0.963504	-1.31998	371.715	1.74405e-104	5.44266e-100
TCONS_00018955	SRBD1	-0.850635	1.80226	299.858	1.24377e-103	3.88117e-99
TCONS_00018957	SRBD1	0.850635	-1.80226	299.858	1.24377e-103	3.88117e-99
TCONS_00032504	FKBP15	-0.290401	-2.52197	504.762	1.74285e-103	5.43822e-99
TCONS_00005633	DLAT	-2.7662	2.14347	379.484	4.88788e-103	1.52512e-98
TCONS_00002813	ADAR	-1.85623	-1.34893	821.306	8.8899e-103	2.77374e-98
TCONS_00032655	TOR1A	-2.77435	1.63417	510.105	1.3417e-102	4.18611e-98
TCONS_00004570	PIK3AP1	2.47564	-2.43387	285.582	8.8299e-102	2.75484e-97
TCONS_00004573	PIK3AP1	-2.47564	2.43387	285.582	8.8299e-102	2.75484e-97
TCONS_00004668	SH3PXD2A	-3.65045	2.14991	568.632	3.49861e-101	1.09146e-96
TCONS_00019538	STAT1	-1.39979	-1.07902	713.976	4.1759e-101	1.30271e-96
TCONS_00019544	STAT1	1.39979	1.07902	713.976	4.1759e-101	1.30271e-96
TCONS_00027826	FAM65B	-2.77733	2.27964	348.646	2.63169e-100	8.20928e-96
TCONS_00021175	GART	-0.953982	-1.10574	602.912	6.93674e-100	2.16378e-95
TCONS_00029037	GTF2I	-3.58739	1.8153	640.67	3.15904e-99	9.85369e-95
TCONS_00022569	IL17RB	-1.07035	-1.4478	599.545	2.65776e-98	8.28982e-94
TCONS_00031229	EXT1	-3.28365	2.40892	423.68	3.84738e-98	1.2e-93
TCONS_00029674	NT5C3A	-1.06227	-2.48294	698.596	4.47782e-98	1.39659e-93
TCONS_00017708	GMCL1	-0.866803	-0.881487	617.985	4.7489e-98	1.48109e-93
TCONS_00030199	ZC3HAV1	-3.59739	2.29741	515.978	1.72457e-97	5.37843e-93
TCONS_00021549	GTPBP1	-3.49295	2.1356	523.451	1.94261e-97	6.05821e-93
TCONS_00017178	IL4I1	-0.552676	1.47066	332.868	3.29065e-97	1.02619e-92
TCONS_00008160	HVCN1	-3.01553	1.89296	471.249	8.35098e-97	2.60417e-92
TCONS_00002447	FUBP1	-0.870769	-2.07878	573.78	9.50866e-97	2.96508e-92
TCONS_00002448	FUBP1	0.870769	2.07878	573.78	9.50866e-97	2.96508e-92
TCONS_00019432	IFIH1	1.88299	0.764042	880.391	1.21299e-96	3.78223e-92
TCONS_00019436	IFIH1	-1.88299	-0.764042	880.391	1.21299e-96	3.78223e-92
TCONS_00005632	DLAT	2.70991	-2.13077	354.097	1.99882e-96	6.23213e-92
TCONS_00007302	ACTR6	3.35131	-2.26524	459.089	4.60008e-96	1.43421e-91
TCONS_00018281	GLS	-1.15843	-0.775591	696.996	9.41549e-96	2.93547e-91
TCONS_00018612	SP140L	-1.26558	2.20322	233.935	2.45638e-95	7.65802e-91
TCONS_00022432	ATRIP	-1.73842	-1.0409	785.872	2.52163e-94	7.8612e-90
TCONS_00003307	TARBP1	-1.8102	1.88387	276.643	2.84813e-94	8.87874e-90
TCONS_00029231	HBP1	2.02446	-1.36416	422.666	2.83612e-93	8.84103e-89
TCONS_00006611	TMPRSS13	-0.155651	-2.44352	445.144	6.04986e-93	1.88586e-88
TCONS_00022443	ATRIP	-0.0284862	-1.90802	366.691	1.46142e-92	4.55525e-88
TCONS_00010888	HERC1	-0.761463	1.34474	329.019	3.67094e-92	1.14419e-87
TCONS_00015526	AK311380	0.831643	-1.45568	308.188	4.26822e-92	1.33032e-87
TCONS_00001724	BROX	-1.79927	1.29723	405.328	6.62281e-92	2.06413e-87
TCONS_00001725	BROX	1.79927	-1.29723	405.328	6.62281e-92	2.06413e-87
TCONS_00030185	C7orf49	-1.40949	1.31937	355.427	6.98751e-92	2.17766e-87
TCONS_00002798	RAB13	0.108356	-1.02136	426.663	1.58897e-91	4.95185e-87
TCONS_00021548	GTPBP1	-3.17608	1.60138	578.848	9.58626e-91	2.98737e-86
TCONS_00000604	IFI44L	-1.38354	1.53883	298.424	1.84139e-90	5.73815e-86
TCONS_00017219	IL4I1	-0.215349	-1.18613	429.055	2.15759e-90	6.72326e-86
TCONS_00029673	NT5C3A	-3.58989	1.28509	808.021	2.4836e-90	7.73889e-86
TCONS_00003088	IVNS1ABP	-1.0945	0.905833	455.953	2.5291e-90	7.88041e-86
TCONS_00025216	IRF2	-2.10437	1.04389	537.14	2.06445e-88	6.43243e-84
TCONS_00022440	ATRIP	-1.66209	1.82857	255.316	5.99394e-88	1.86753e-83
TCONS_00018545	PNKD	-1.59118	-1.09927	720.552	6.54341e-88	2.03866e-83
TCONS_00012573	DPH1	-0.502385	-2.52594	550.015	6.76701e-88	2.1082e-83
TCONS_00000640	GBP1P1	-2.44893	2.6192	238.538	1.58795e-87	4.94693e-83
TCONS_00021652	TBC1D22A	-2.87285	2.31151	331.592	3.90468e-87	1.21639e-82
TCONS_00025218	IRF2	-1.03663	-0.614361	695.494	6.47725e-87	2.01773e-82
TCONS_00007383	ATP2A2	0.987912	0.63442	675.622	4.16326e-86	1.29686e-81
TCONS_00007384	ATP2A2	-0.987912	-0.63442	675.622	4.16326e-86	1.29686e-81
TCONS_00003972	IFIT3	-0.280277	-1.36763	403.766	9.19543e-86	2.86419e-81
TCONS_00012125	FOPNL	-3.61855	1.99876	560.673	9.63767e-86	3.00185e-81
TCONS_00002282	RRAGC	-1.06355	-0.86605	620.892	4.07659e-85	1.26969e-80
TCONS_00028889	CCM2	-3.51779	1.91405	549.849	1.92321e-83	5.98983e-79
TCONS_00017800	VAMP5	-0.966281	-1.43562	530.603	3.77082e-83	1.17438e-78
TCONS_00025553	PAPD4	-1.03982	-1.71367	552.973	6.08779e-83	1.89592e-78
TCONS_00012450	KARS	-1.60249	-0.654638	793.114	2.1806e-82	6.7906e-78
TCONS_00012451	KARS	1.60249	0.654638	793.114	2.1806e-82	6.7906e-78
TCONS_00006994	SP1	-2.71743	1.56071	457.846	2.47262e-82	7.6995e-78
TCONS_00021043	RRP1B	1.03176	-1.56022	257.206	5.82383e-82	1.81336e-77
TCONS_00014105	DHX58	-3.07819	1.51096	557.251	6.46928e-82	2.01428e-77
TCONS_00018610	SP140L	-0.816604	-2.51197	646.195	1.16204e-81	3.61802e-77
TCONS_00007837	TFCP2	-1.31768	0.815397	486.793	2.22795e-81	6.93651e-77
TCONS_00003514	PFKFB3	-2.42335	1.95297	296.701	8.09133e-81	2.51907e-76
TCONS_00025375	WDR70	-2.53496	1.79799	349.006	1.78974e-80	5.57181e-76
TCONS_00022337	GOLGA4	-1.68381	1.79881	237.728	1.85701e-80	5.78105e-76
TCONS_00015524	AK311380	-0.823931	1.40433	279.127	1.99978e-80	6.2253e-76
TCONS_00020828	ZBP1	-3.78888	1.87531	625.043	3.21052e-80	9.99402e-76
TCONS_00003091	IVNS1ABP	-1.04898	-0.881712	597.121	6.55763e-80	2.04126e-75
TCONS_00032654	TOR1A	2.67173	-1.58993	430.52	9.9672e-80	3.10239e-75
TCONS_00023820	ISY1-RAB43	-2.99085	1.04488	713.12	3.43562e-79	1.06934e-74
TCONS_00003512	PFKFB3	2.39286	-1.96271	283.654	1.1095e-78	3.45321e-74
TCONS_00017793	MAT2A	-1.95406	-0.873271	818.225	1.76943e-78	5.507e-74
TCONS_00009729	TINF2	-1.29963	-0.71106	690.023	2.02328e-78	6.29684e-74
TCONS_00008077	TMCC3	-2.36371	1.89307	289.195	1.71053e-77	5.32316e-73
TCONS_00023643	EIF4E3	-0.214977	-1.67724	353.937	2.33147e-77	7.25529e-73
TCONS_00001723	MIA3	-0.836375	-0.93352	534.244	2.35782e-77	7.33708e-73
TCONS_00006415	ARAP1	-1.7271	-1.12882	719.462	4.16941e-77	1.29739e-72
TCONS_00027594	UTRN	-1.73084	-1.96614	764.398	2.75074e-76	8.55893e-72
TCONS_00030718	EBAG9	-2.62286	1.81069	349.253	3.1909e-76	9.92816e-72
TCONS_00006992	SP1	1.77493	-1.25949	359.136	1.49023e-75	4.63655e-71
TCONS_00000667	RPL5	-1.77247	0.695943	598.125	2.10329e-75	6.54376e-71
TCONS_00028162	ETV7	-0.751623	2.43297	239.474	2.14661e-75	6.67831e-71
TCONS_00028056	PSMB8	-1.20899	-1.66854	574.028	3.07486e-75	9.56588e-71
TCONS_00010398	KIF23	-1.41067	2.41059	172.671	4.99315e-75	1.55332e-70
TCONS_00025374	WDR70	2.48156	-1.78999	323.28	8.54463e-75	2.65806e-70
TCONS_00021040	RRP1B	-1.02315	1.51017	239.166	2.75504e-74	8.56983e-70
TCONS_00026295	TMED7-TICAM2	1.08841	-0.629758	529.895	3.08997e-74	9.61136e-70
TCONS_00018162	TANK	1.62305	-1.43761	283.682	1.28322e-73	3.99132e-69
TCONS_00018167	TANK	-1.63	1.40562	292.487	1.31105e-73	4.07777e-69
TCONS_00029948	SAMD9L	-1.17823	-1.45137	553.064	1.38731e-73	4.31482e-69
TCONS_00029002	FKBP6	-1.666	1.2944	323.716	1.33654e-72	4.15677e-68
TCONS_00001796	TSNAX-DISC1	-2.41644	1.2608	461.398	1.81276e-72	5.63769e-68
TCONS_00010266	DUOX1	-1.54342	-1.07839	659.022	2.80099e-72	8.71081e-68
TCONS_00029369	TMEM140	1.09576	-2.65633	219.607	4.70296e-72	1.46253e-67
TCONS_00003120	DENND1B	-2.46865	1.09155	537.811	6.18669e-72	1.92387e-67
TCONS_00006620	TMPRSS13	-2.84104	2.20039	320.161	7.9688e-72	2.47798e-67
TCONS_00024106	SH3BP2	-0.533901	-2.15766	463.475	3.03564e-71	9.43932e-67
TCONS_00018237	MIR548N	-0.0513769	-0.824337	423.62	6.28378e-71	1.95382e-66
TCONS_00027520	NCOA7	-1.15032	-1.71986	552.261	7.62927e-71	2.37209e-66
TCONS_00032884	XLOC_010366	-3.25386	1.93235	449.437	1.07262e-70	3.33488e-66
TCONS_00024213	TBC1D1	-2.90079	0.94605	706.571	1.4433e-70	4.48709e-66
TCONS_00017217	IL4I1	-1.48223	-0.868482	666.491	3.21464e-70	9.99368e-66
TCONS_00009380	SRSF5	1.42289	-0.781411	470.513	1.58639e-68	4.93131e-64
TCONS_00009381	SRSF5	-1.42289	0.781411	470.513	1.58639e-68	4.93131e-64
TCONS_00017798	MAT2A	-1.41112	-1.00343	620.903	1.58883e-68	4.93855e-64
TCONS_00007546	GTF2H3	-2.38327	1.69514	307.549	2.11562e-68	6.57576e-64
TCONS_00029092	ANKIB1	-1.01506	-1.19913	504.826	3.41807e-68	1.06234e-63
TCONS_00023824	ISY1-RAB43	-1.00666	-0.556921	646.565	9.77623e-68	3.03835e-63
TCONS_00021514	GTPBP1	-1.59705	-1.56268	652.557	1.28659e-67	3.99845e-63
TCONS_00024173	CD38	-0.937979	1.38292	236.43	2.20094e-67	6.83944e-63
TCONS_00012123	FOPNL	3.38022	-1.84417	493.344	2.44025e-67	7.58283e-63
TCONS_00029373	TMEM140	-1.41643	1.72741	189.029	3.27671e-67	1.01814e-62
TCONS_00009821	NIN	-0.0106658	-1.29217	309.012	5.01291e-67	1.55756e-62
TCONS_00021519	GTPBP1	-2.87265	2.11165	334.048	1.24693e-66	3.87409e-62
TCONS_00005078	TMX2-CTNND1	-0.93757	-0.595497	612.24	1.65807e-66	5.15131e-62
TCONS_00000807	SRGAP2B	-3.06496	1.17949	627.151	1.77972e-66	5.52905e-62
TCONS_00002801	RAB13	-0.107074	0.969151	352.202	2.98089e-66	9.26014e-62
TCONS_00014215	ARHGAP27	-1.94939	-1.60396	753.501	1.48043e-65	4.59836e-61
TCONS_00011897_add	LINC00875	-1.89477	0.955861	453.675	2.82643e-65	8.7789e-61
TCONS_00165014_add	SPAG1	-2.30967	1.51878	329.542	3.8846e-65	1.20652e-60
TCONS_00013577	METRNL	1.05509	1.42411	495.214	7.70923e-65	2.39418e-60
TCONS_00013585	METRNL	-1.05509	-1.42411	495.214	7.70923e-65	2.39418e-60
TCONS_00022334	GOLGA4	0.438263	-1.05718	305.141	7.82056e-65	2.4286e-60
TCONS_00032357	GOLM1	-0.673799	-1.0218	440.836	2.09003e-64	6.48974e-60
TCONS_00032360	GOLM1	0.673799	1.0218	440.836	2.09003e-64	6.48974e-60
TCONS_00018605	SP140	-1.33955	0.793254	433.002	3.91771e-63	1.21629e-58
TCONS_00015062	FECH	-2.57416	1.86577	289.552	6.8025e-63	2.11184e-58
TCONS_00015063	FECH	2.57416	-1.86577	289.552	6.8025e-63	2.11184e-58
TCONS_00018504	RUFY4	-1.34505	1.6133	187.693	9.08269e-63	2.81954e-58
TCONS_00013598	ABR	0.390679	1.19992	358.65	2.41938e-62	7.50977e-58
TCONS_00028825	STK17A	-1.22201	-0.790393	591.262	4.21793e-62	1.3092e-57
TCONS_00019505	SESTD1	-2.98575	1.83756	384.399	6.92901e-62	2.15056e-57
TCONS_00022675	BBX	-2.99789	1.55255	455.289	1.5005e-61	4.65694e-57
TCONS_00023823	RAB43	1.79138	-1.56371	226.906	1.99872e-61	6.20304e-57
TCONS_00002854	FAM189B	1.82672	-0.734678	533.523	2.44648e-61	7.59216e-57
TCONS_00002855	FAM189B	-1.82672	0.734678	533.523	2.44648e-61	7.59216e-57
TCONS_00021598	L3MBTL2	-2.44515	2.01183	242.356	3.21985e-61	9.99153e-57
TCONS_00023584	ARHGEF3	2.05783	1.50463	763.806	9.53016e-61	2.95721e-56
TCONS_00023585	ARHGEF3	-2.05783	-1.50463	763.806	9.53016e-61	2.95721e-56
TCONS_00000437	SMAP2	-0.402625	-0.857817	415.976	1.01887e-60	3.16134e-56
TCONS_00021597	L3MBTL2	2.20569	-2.17834	192.11	1.05055e-60	3.25954e-56
TCONS_00027025	MICA	0.578219	-1.06732	281.791	1.44966e-60	4.49773e-56
TCONS_00013596	ABR	-1.46177	-0.762997	647.583	2.00169e-60	6.21025e-56
TCONS_00024176	CD38	-0.377126	-2.42801	571.404	2.07171e-60	6.42726e-56
TCONS_00019842	CDC25B	-1.29188	-1.11616	547.678	5.97355e-60	1.85317e-55
TCONS_00014222	ARHGAP27	-2.61524	0.599971	792.028	1.20517e-59	3.73854e-55
TCONS_00030056	ATXN7L1	-1.7462	1.60512	205.837	1.6277e-59	5.04912e-55
TCONS_00010429	PML	-0.134078	-0.55444	493.662	3.86558e-59	1.19907e-54
TCONS_00020969	SON	0.0801062	-0.41148	572.205	4.39448e-59	1.36308e-54
TCONS_00002123	C1orf63	-0.222649	0.87246	342.996	4.77738e-59	1.4818e-54
TCONS_00005523	ARHGEF17	2.04006	0.911998	764.487	7.7903e-59	2.41624e-54
TCONS_00005524	ARHGEF17	-2.04006	-0.911998	764.487	7.7903e-59	2.41624e-54
TCONS_00014076	JUP	-1.68915	-1.72294	685.473	1.1954e-58	3.70742e-54
TCONS_00031646	ANKRD20A3	-1.81174	-1.35796	676.129	1.26471e-58	3.92223e-54
TCONS_00007544	GTF2H3	0.947313	-1.3216	214.021	1.82119e-58	5.64787e-54
TCONS_00025546	PAPD4	-2.1044	0.703236	596.554	2.05851e-58	6.38365e-54
TCONS_00019844	CDC25B	-2.3183	1.60915	282.056	2.67681e-58	8.30052e-54
TCONS_00016017	MYADM	-0.629832	-1.04239	404.746	5.03451e-58	1.5611e-53
TCONS_00028992	FKBP6	-0.916657	1.06546	274.42	6.04753e-58	1.87516e-53
TCONS_00003971	IFIT3	-1.76727	1.98204	146.705	7.37249e-58	2.28592e-53
TCONS_00006000	CD59	-1.42351	-0.623909	669.422	8.73538e-58	2.7084e-53
TCONS_00014943	LPIN2	1.45823	-1.58559	177.83	1.9886e-57	6.16505e-53
TCONS_00031609	CREB3	1.04115	-1.25941	224.865	2.85082e-57	8.83782e-53
TCONS_00001795	TSNAX-DISC1	2.34191	-1.2448	393.286	3.65599e-57	1.13336e-52
TCONS_00016707	ISYNA1	-1.55518	-0.972572	618.359	4.51925e-57	1.40092e-52
TCONS_00010031	WARS	-1.31869	1.6021	166.349	5.68862e-57	1.7633e-52
TCONS_00002346	MKNK1	-0.986966	0.57568	484.204	6.10507e-57	1.89233e-52
TCONS_00027641	SYTL3	-0.716439	1.50915	181.417	9.29938e-57	2.88234e-52
TCONS_00012259	BOLA2	-1.26392	-0.797588	576.851	1.38247e-56	4.28483e-52
TCONS_00021843	APOL3	0.291701	0.799303	400.503	1.53959e-56	4.77166e-52
TCONS_00030903	MSR1	-0.552499	-0.821217	430.518	2.04795e-56	6.34701e-52
TCONS_00030904	MSR1	0.552499	0.821217	430.518	2.04795e-56	6.34701e-52
TCONS_00022568	IL17RB	1.03919	1.31255	462.789	3.7834e-56	1.17248e-51
TCONS_00022332	GOLGA4	-1.15329	-0.84586	538.877	4.54882e-56	1.40963e-51
TCONS_00008075	TMCC3	-3.07427	1.81213	407.614	4.78001e-56	1.48118e-51
TCONS_00020050	SRSF6	0.654609	-0.997671	279.186	1.69349e-55	5.24727e-51
TCONS_00025540	PAPD4	-1.98012	0.63872	593.11	1.19e-54	3.68699e-50
TCONS_00027097	CFB	0.488927	-2.02013	195.263	1.92205e-54	5.9549e-50
TCONS_00021024	MX1	-0.991336	-0.91501	483.002	2.07956e-54	6.44269e-50
TCONS_00006408	ARAP1	-1.48615	-0.969688	587.625	9.74893e-54	3.02002e-49
TCONS_00031610	CREB3	-1.03767	1.21777	218.554	1.93586e-53	5.9967e-49
TCONS_00021837	APOL3	-0.981227	-1.01224	461.081	2.06265e-53	6.38926e-49
TCONS_00006460	NDUFC2-KCTD14	-4.05499	1.34354	791.236	2.17864e-53	6.74833e-49
TCONS_00008176	NAA25	-1.3799	-0.818273	583.82	6.83284e-53	2.11627e-48
TCONS_00021180	RCAN1	-2.57592	1.14671	464.503	6.98946e-53	2.1647e-48
TCONS_00027029	MICB	-2.45126	1.9282	248.302	8.19635e-53	2.53841e-48
TCONS_00166459_add	PSD3	-1.13168	1.32308	194.754	8.27353e-53	2.56223e-48
TCONS_00033295	SLC9A6	-2.01323	-1.18835	712.105	8.37868e-53	2.59471e-48
TCONS_00023605	PDHB	2.17576	0.749031	807.796	9.95035e-53	3.08133e-48
TCONS_00023606	PDHB	-2.17576	-0.749031	807.796	9.95035e-53	3.08133e-48
TCONS_00016543	DNMT1	-1.86581	-1.24123	669.529	1.06246e-52	3.28992e-48
TCONS_00032929	MSL3	-2.80708	0.837371	666.751	1.17753e-52	3.64611e-48
TCONS_00026112	AK056817	-1.65929	-0.627563	703.112	1.40808e-52	4.35983e-48
TCONS_00017567	YIPF4	-1.61073	-0.467049	759.691	1.58915e-52	4.92032e-48
TCONS_00031226	EXT1	-3.20364	1.48015	498.553	3.51711e-52	1.08893e-47
TCONS_00001702	RPS6KC1	-2.34665	1.61141	263.342	1.45307e-51	4.49857e-47
TCONS_00001100	ADAM15	-1.54882	-0.653853	662.448	1.49853e-51	4.63913e-47
TCONS_00007971	STAT6	1.54914	-1.39026	200.132	4.40641e-51	1.36409e-46
TCONS_00011708	CYLD	-0.861459	-0.810873	462.785	1.14691e-50	3.55036e-46
TCONS_00006276	STX5	-1.05708	-1.39875	449.941	1.51498e-50	4.68961e-46
TCONS_00001988	RERE	-1.4753	-0.801297	599.247	2.81594e-50	8.71647e-46
TCONS_00007643	CD163L1	-2.04716	1.26867	299.59	2.85864e-50	8.84836e-46
TCONS_00007646	CD163L1	2.04716	-1.26867	299.59	2.85864e-50	8.84836e-46
TCONS_00007968	STAT6	-1.5546	1.35859	204.365	3.96554e-50	1.22737e-45
TCONS_00017778	HK2	-3.00553	1.10415	577.456	4.60864e-50	1.42637e-45
TCONS_00012229	NPIPL1	-4.25428	1.13441	924.32	7.38438e-50	2.28539e-45
TCONS_00006265	HNRNPUL2-BSCL2	0.468783	1.17967	324.878	7.96864e-50	2.46614e-45
TCONS_00006266	HNRNPUL2-BSCL2	-0.468783	-1.17967	324.878	7.96864e-50	2.46614e-45
TCONS_00020837	ZBP1	0.217119	-2.36869	415.338	9.02962e-50	2.79431e-45
TCONS_00021700	HIRA	0.136645	0.708121	383.326	1.79902e-49	5.56708e-45
TCONS_00013172	NMT1	0.12174	-0.501263	466.505	2.71998e-49	8.41644e-45
TCONS_00025931	MAT2B	0.0154644	-0.496007	473.91	2.81223e-49	8.7016e-45
TCONS_00018428	CASP8	-2.07733	1.04478	382.616	3.396e-49	1.05076e-44
TCONS_00004500	KCNMA1	0.270777	-1.26331	211.127	4.60293e-49	1.42415e-44
TCONS_00002046	SDHB	1.66022	-1.44049	190.509	5.12003e-49	1.58409e-44
TCONS_00026350	SAR1B	-1.80502	-0.43348	810.073	5.83398e-49	1.80492e-44
TCONS_00166460_add	PSD3	-0.52482	-1.88838	401.623	1.47892e-48	4.57532e-44
TCONS_00023214	SH3BP5	-1.06114	-1.46991	450.632	1.78951e-48	5.53584e-44
TCONS_00002045	SDHB	-1.66832	1.41162	195.49	2.28117e-48	7.05658e-44
TCONS_00013568	FOXK2	0.0842541	-0.728271	353.242	2.60513e-48	8.05845e-44
TCONS_00013569	FOXK2	-0.0842541	0.728271	353.242	2.60513e-48	8.05845e-44
TCONS_00019506	SESTD1	2.54073	-1.55189	306.016	2.66812e-48	8.25278e-44
TCONS_00019576	CLK1	-0.00477774	-0.920555	297.248	7.01583e-48	2.16978e-43
TCONS_00011709	CYLD	-3.32207	1.51178	511.357	7.04375e-48	2.17835e-43
TCONS_00006736	WNT5B	0.156743	-0.711721	352.69	1.1649e-47	3.60246e-43
TCONS_00027103	CFB	-0.582538	1.55114	150.089	1.23242e-47	3.81114e-43
TCONS_00014941	LPIN2	-2.50163	1.44009	323.642	1.38741e-47	4.29028e-43
TCONS_00008245	KDM2B	-2.44913	1.61876	270.618	1.73447e-47	5.36332e-43
TCONS_00021678	KLHDC7B	-2.28068	1.66472	228.819	1.92916e-47	5.96515e-43
TCONS_00013157	TMEM106A	-0.563979	-0.944375	364.209	2.4674e-47	7.62919e-43
TCONS_00018697	PPP1R7	-0.873529	-0.470633	578.501	4.51978e-47	1.39743e-42
TCONS_00014133	DHX58	-1.73098	-1.71187	710.66	5.19019e-47	1.60465e-42
TCONS_00016623	TNPO2	0.303038	-1.07579	232.147	5.72443e-47	1.76977e-42
TCONS_00004669	SH3PXD2A	-0.411745	-1.42476	292.64	5.78454e-47	1.78829e-42
TCONS_00020128	DDX27	1.21499	-1.80512	105.501	8.76483e-47	2.70956e-42
TCONS_00141434_add	CLK4	-2.2067	0.872474	475.348	1.02107e-46	3.15632e-42
TCONS_00009191	GMPR2	-0.338719	0.631381	378.327	1.11032e-46	3.43211e-42
TCONS_00019123	MOB1A	0.77443	-0.414454	531.842	1.5771e-46	4.87482e-42
TCONS_00019124	MOB1A	-0.77443	0.414454	531.842	1.5771e-46	4.87482e-42
TCONS_00021677	KLHDC7B	2.22257	-1.68417	212.9	1.94587e-46	6.0143e-42
TCONS_00030880	SGK223	-1.25747	0.765404	363.106	1.95167e-46	6.03203e-42
TCONS_00004204	IL15RA	-2.287	1.45542	270.948	2.23791e-46	6.91649e-42
TCONS_00017726	ZNF638	-0.0446502	1.10847	244.535	3.03895e-46	9.39187e-42
TCONS_00024104	SH3BP2	-1.16959	-0.854067	497.609	3.09087e-46	9.55202e-42
TCONS_00024748	TLR6	0.482082	-1.36184	167.983	5.42153e-46	1.67536e-41
TCONS_00009884	ZFYVE26	-0.600527	-0.909538	370.828	6.43994e-46	1.99001e-41
TCONS_00004983	CD44	-3.43237	0.618554	946.431	8.36402e-46	2.5844e-41
TCONS_00009818	NIN	-1.57264	1.16842	240.044	1.12382e-45	3.47239e-41
TCONS_00031762	NANS	-1.80665	0.850724	399.917	1.72541e-45	5.33101e-41
TCONS_00020053	SRSF6	-1.0687	0.853055	300.215	2.22807e-45	6.88385e-41
TCONS_00029943	SAMD9L	-0.961175	0.7239	348.017	2.9968e-45	9.25861e-41
TCONS_00017720	ZNF638	-0.971369	-1.15064	410.84	3.11214e-45	9.61465e-41
TCONS_00004809	AP2A2	-0.479215	0.916743	257.766	3.45596e-45	1.06765e-40
TCONS_00011825	NFATC3	-1.94768	-0.844613	691.109	3.81429e-45	1.17831e-40
TCONS_00014836	RNF138	-1.11116	-0.802388	490.423	4.18441e-45	1.29261e-40
TCONS_00014837	RNF138	1.11116	0.802388	490.423	4.18441e-45	1.29261e-40
TCONS_00027032	MICB	0.653267	-1.5119	137.321	4.94248e-45	1.52668e-40
TCONS_00030789	GSDMD	-1.43464	-0.559225	638.636	6.94825e-45	2.14618e-40
TCONS_00027591	UTRN	-1.47796	1.16693	225.666	7.03228e-45	2.17206e-40
TCONS_00021017	MX2	1.69592	0.807395	628.792	8.27458e-45	2.55569e-40
TCONS_00021018	MX2	-1.69592	-0.807395	628.792	8.27458e-45	2.55569e-40
TCONS_00018236	MIR548N	-0.823804	-0.67058	468.023	1.61427e-44	4.98551e-40
TCONS_00007585	SLC6A12	-2.44012	-1.24849	811.822	3.4891e-44	1.07754e-39
TCONS_00000666	RPL5	1.73454	-0.714557	450.308	3.62136e-44	1.11835e-39
TCONS_00024746	TLR6	-1.07943	1.36102	146.058	3.76832e-44	1.16369e-39
TCONS_00008074	TMCC3	0.168422	-2.03034	277.59	4.86592e-44	1.5026e-39
TCONS_00021649	TBC1D22A	0.406597	-1.21705	183.994	6.93104e-44	2.14024e-39
TCONS_00030715	EBAG9	-1.03593	-0.650864	512.162	7.03011e-44	2.17076e-39
TCONS_00000433	SMAP2	-1.07447	0.652578	387.548	8.02096e-44	2.47663e-39
TCONS_00020862	HELZ2	-2.76775	1.25612	427.362	1.33864e-43	4.13293e-39
TCONS_00028536	XLOC_008908	-1.96488	1.89285	161.471	1.59018e-43	4.90936e-39
TCONS_00028739	SNX10	0.192335	-1.0702	223.987	2.34753e-43	7.24705e-39
TCONS_00028741	SNX10	-0.192335	1.0702	223.987	2.34753e-43	7.24705e-39
TCONS_00004123	SEC23IP	-4.42102	0.84187	1094.13	2.81314e-43	8.68359e-39
TCONS_00004811	AP2A2	-0.670122	-1.3039	331.805	3.02862e-43	9.34843e-39
TCONS_00002981	PFDN2	-0.621853	-0.675559	425.33	3.78973e-43	1.16974e-38
TCONS_00022399	LIMD1	1.69401	-0.991227	307.565	4.20124e-43	1.29671e-38
TCONS_00022400	LIMD1	-1.69401	0.991227	307.565	4.20124e-43	1.29671e-38
TCONS_00024621	FRG1	-1.68776	0.873377	356.816	4.25877e-43	1.31438e-38
TCONS_00020781	ZNFX1	2.0107	0.372115	872.29	7.11949e-43	2.19722e-38
TCONS_00020783	ZNFX1	-2.0107	-0.372115	872.29	7.11949e-43	2.19722e-38
TCONS_00019849	PANK2	-2.39128	0.584611	668.146	9.54191e-43	2.94463e-38
TCONS_00015869	CCDC9	-2.98316	0.980182	593.572	1.10085e-42	3.3971e-38
TCONS_00029091	ANKIB1	0.987682	1.09855	406.938	1.14138e-42	3.52208e-38
TCONS_00027238	SRSF3	-2.25083	0.508959	689.347	1.20589e-42	3.72101e-38
TCONS_00027521	NCOA7	-0.830609	-1.64362	417.551	1.55832e-42	4.8082e-38
TCONS_00009029	ANKRD10	-2.33179	-1.08361	767.378	2.04824e-42	6.31964e-38
TCONS_00013595	ABR	-1.26441	-1.26724	470.53	2.41386e-42	7.44749e-38
TCONS_00006933	PPHLN1	-0.892564	-0.379238	617.276	2.43608e-42	7.51579e-38
TCONS_00021026	MX1	-0.590008	0.521951	421.005	2.81434e-42	8.68224e-38
TCONS_00028446	MAP7	0.398424	-1.73171	154.842	3.29059e-42	1.01512e-37
TCONS_00013277	ABI3	-0.285077	-1.1944	258.703	3.80563e-42	1.17396e-37
TCONS_00002808	ADAR	-2.06153	0.554418	607.401	5.46286e-42	1.68513e-37
TCONS_00003089	IVNS1ABP	-0.555095	-0.577559	448.833	5.85408e-42	1.80569e-37
TCONS_00006410	ARAP1	-3.31635	1.32049	543.713	7.08255e-42	2.18454e-37
TCONS_00030882	SGK223	1.21488	-0.831491	304.452	8.93782e-42	2.75669e-37
TCONS_00024170	CD38	-1.15167	0.643405	390.071	9.99011e-42	3.08115e-37
TCONS_00018531	RUFY4	-1.87526	-1.10409	631.595	1.12692e-41	3.47552e-37
TCONS_00004387	HNRNPF	0.143356	0.558147	410.743	1.42008e-41	4.37953e-37
TCONS_00004391	HNRNPF	-0.143356	-0.558147	410.743	1.42008e-41	4.37953e-37
TCONS_00001699	RPS6KC1	1.25052	-1.1177	201.971	1.73894e-41	5.36253e-37
TCONS_00180367_add	FAM122C	-1.84943	0.644416	498.605	2.55046e-41	7.86461e-37
TCONS_00008250	KDM2B	0.389026	-0.94907	230.618	3.11044e-41	9.59104e-37
TCONS_00019261	RNF149	-1.43483	-0.418926	690.373	5.0886e-41	1.56902e-36
TCONS_00032786	DPP7	-1.56838	-0.526311	664.585	5.2249e-41	1.61099e-36
TCONS_00030046	ATXN7L1	-0.214716	-1.14019	247.836	6.11561e-41	1.88557e-36
TCONS_00013827	PMP22	0.732164	-1.22923	153.964	6.49137e-41	2.00135e-36
TCONS_00021182	RCAN1	2.47564	-1.11668	397.638	7.36928e-41	2.27195e-36
TCONS_00012868	SMCR8	1.37577	-1.18974	188.166	7.99555e-41	2.46495e-36
TCONS_00026287	FEM1C	-2.76069	1.0989	472.43	1.17037e-40	3.60803e-36
TCONS_00118634_add	OXNAD1	-0.714835	-0.720378	412.29	1.36406e-40	4.20472e-36
TCONS_00001908	NADK	-1.28022	-1.33074	474.048	1.86379e-40	5.74495e-36
TCONS_00032051	PHPT1	-0.263682	0.938403	234.065	3.21607e-40	9.91288e-36
TCONS_00008251	KDM2B	-1.36431	-0.864017	512.124	3.22583e-40	9.94266e-36
TCONS_00016016	MYADM	0.616846	0.97277	333.662	3.93155e-40	1.21174e-35
TCONS_00012869	SMCR8	-1.38102	1.15783	192.903	7.45338e-40	2.29691e-35
TCONS_00030152	ZNF800	-0.94215	-1.39707	391.257	1.14696e-39	3.53435e-35
TCONS_00025013	ELF2	-1.73621	0.876831	344.962	1.24452e-39	3.83487e-35
TCONS_00020129	DDX27	-1.35096	1.57023	101.723	1.48628e-39	4.57953e-35
TCONS_00011008	IMP3	0.344308	-1.06015	195.442	1.99324e-39	6.14137e-35
TCONS_00024111	HTT	1.18211	0.612269	533.073	2.00849e-39	6.18815e-35
TCONS_00024112	HTT	-1.18211	-0.612269	533.073	2.00849e-39	6.18815e-35
TCONS_00002918	ARHGEF11	-1.39761	-0.515954	620.682	2.11465e-39	6.51482e-35
TCONS_00029179	SLC12A9	0.55704	-0.856585	246.414	2.31074e-39	7.11871e-35
TCONS_00030751	TRIB1	-1.8802	-0.988493	627.722	2.49566e-39	7.68812e-35
TCONS_00008049	CSRP2	-2.49033	1.40567	300.422	3.67425e-39	1.13182e-34
TCONS_00019381	PRPF40A	2.10456	0.325993	911.586	4.7373e-39	1.45918e-34
TCONS_00019382	PRPF40A	-2.10456	-0.325993	911.586	4.7373e-39	1.45918e-34
TCONS_00007839	TFCP2	0.166205	-0.851247	257.962	6.42414e-39	1.97864e-34
TCONS_00018432	CASP8	-0.831381	-0.817506	397.873	7.01636e-39	2.16097e-34
TCONS_00032049	PHPT1	-0.296112	-0.833115	306.848	8.704e-39	2.68066e-34
TCONS_00027824	FAM65B	-1.52157	-1.59273	629.596	1.08111e-38	3.3294e-34
TCONS_00026283	REEP5	-0.697211	-0.428952	532.009	1.20871e-38	3.72223e-34
TCONS_00132555_add	BC016361	-2.47393	0.84332	509.481	1.68543e-38	5.18995e-34
TCONS_00010545	ZNF710	-0.796409	-0.51371	496.947	2.27165e-38	6.99486e-34
TCONS_00029945	SAMD9L	-2.59884	1.41168	322.879	2.40545e-38	7.40663e-34
TCONS_00030711	ENY2	-3.42285	1.07117	651.383	3.19258e-38	9.82995e-34
TCONS_00002281	RRAGC	1.03717	0.788497	442.262	3.90362e-38	1.20188e-33
TCONS_00002980	PFDN2	0.168717	0.642248	354.221	4.72774e-38	1.45558e-33
TCONS_00011512	SPN	0.720398	-0.641028	335.447	4.78276e-38	1.47247e-33
TCONS_00011517	SPN	-0.720398	0.641028	335.447	4.78276e-38	1.47247e-33
TCONS_00136015_add	LOC153684	-1.32887	0.616933	407.732	5.0985e-38	1.56957e-33
TCONS_00014101	DNAJC7	-1.75968	-0.331409	812.603	5.32844e-38	1.64031e-33
TCONS_00173260_add	LINC00094	0.0311517	-0.767514	288.382	7.95282e-38	2.44812e-33
TCONS_00001984	RERE	-1.16459	0.941554	233.482	9.11553e-38	2.80585e-33
TCONS_00018527	RUFY4	-1.71495	-1.41157	613.999	2.21574e-37	6.81982e-33
TCONS_00013032	CCL4	-2.07963	1.46806	197.397	2.22353e-37	6.84357e-33
TCONS_00004667	SH3PXD2A	-2.4311	1.52833	269.764	2.26239e-37	6.96296e-33
TCONS_00006732	ERC1	-1.77787	1.08932	252.671	2.49642e-37	7.68297e-33
TCONS_00010708	GOLGA8B	-1.71681	-0.83312	591.987	2.49931e-37	7.69162e-33
TCONS_00004501	KCNMA1	-0.263816	1.15942	170.858	2.84556e-37	8.75692e-33
TCONS_00012488	XLOC_004047	2.17185	-1.72198	238.942	3.48127e-37	1.07129e-32
TCONS_00002068	EIF4G3	-2.11405	-1.40389	736.421	3.86198e-37	1.18841e-32
TCONS_00021599	L3MBTL2	-3.60209	1.25882	629.576	4.93932e-37	1.51988e-32
TCONS_00029451_add	OR8G1	0.474082	-1.92345	193.354	6.05906e-37	1.86437e-32
TCONS_00018871	MEMO1	-0.731658	-0.521687	474.156	6.28669e-37	1.93435e-32
TCONS_00028233	PLA2G7	-1.73126	-0.292921	833.414	6.31483e-37	1.94295e-32
TCONS_00004223	IL15RA	-1.07529	-0.947318	414.504	7.12821e-37	2.19307e-32
TCONS_00008692	UBAC2	-1.61628	-0.825795	564.57	7.13271e-37	2.19438e-32
TCONS_00009777	BAZ1A	-1.41032	-0.3247	730.256	7.89427e-37	2.42859e-32
TCONS_00023215	SH3BP5	1.02752	1.34905	401.016	9.27396e-37	2.85295e-32
TCONS_00004426	SGMS1	-0.894573	-0.892606	383.069	1.0916e-36	3.35797e-32
TCONS_00136025_add	LOC153684	0.479232	-0.622768	328.667	1.47708e-36	4.54364e-32
TCONS_00009661	HNRNPC	-3.92106	1.05183	798.402	1.62373e-36	4.99459e-32
TCONS_00004909	FAR1	-0.643553	-0.806985	353.146	1.71159e-36	5.2645e-32
TCONS_00004910	FAR1	0.643553	0.806985	353.146	1.71159e-36	5.2645e-32
TCONS_00006930	PPHLN1	-2.79797	1.18093	429.64	1.72242e-36	5.29746e-32
TCONS_00031837	PALM2-AKAP2	-0.503441	-1.22492	270.913	1.78106e-36	5.47764e-32
TCONS_00033390	DHRSX	-0.243411	-0.430877	465.344	2.25289e-36	6.92831e-32
TCONS_00033398	DHRSX	0.243411	0.430877	465.344	2.25289e-36	6.92831e-32
TCONS_00015075	CD226	1.19309	-0.955392	221.61	3.73395e-36	1.14819e-31
TCONS_00002069	EIF4G3	-1.84165	0.972356	301.809	3.97103e-36	1.22105e-31
TCONS_00012854	TRPV2	-1.46519	-0.423301	666.293	5.2771e-36	1.6226e-31
TCONS_00027593	UTRN	-1.78304	-1.30545	606.012	5.63155e-36	1.73153e-31
TCONS_00002471	MCOLN2	-1.38868	-0.676622	538.523	5.7272e-36	1.76088e-31
TCONS_00024107	SH3BP2	-1.98125	-0.821217	657.431	8.65271e-36	2.66019e-31
TCONS_00031866	RGS3	-1.61698	-1.44937	604.209	1.61792e-35	4.97396e-31
TCONS_00024620	FRG1	1.63584	-0.915151	287.563	2.16036e-35	6.64138e-31
TCONS_00029641	HNRNPA2B1	-1.64368	-0.695461	592.157	2.27985e-35	7.0085e-31
TCONS_00023818	RAB43	-2.39569	1.28254	296.494	2.29392e-35	7.0515e-31
TCONS_00002919	ARHGEF11	-1.70265	-0.418393	721.661	2.39374e-35	7.35813e-31
TCONS_00004420	SGMS1	-1.76508	1.25512	186.489	2.74826e-35	8.44761e-31
TCONS_00016639	STX10	-2.64112	0.472706	776.971	3.72705e-35	1.14551e-30
TCONS_00019892	RIN2	1.22711	-1.04209	188.713	3.78539e-35	1.1634e-30
TCONS_00000137	PRDM2	-0.579928	-0.466208	471.404	4.52212e-35	1.38978e-30
TCONS_00023150	FYTTD1	-3.2077	0.847736	680.822	7.19118e-35	2.20992e-30
TCONS_00013278	ABI3	0.279789	1.1322	228.397	8.07256e-35	2.48054e-30
TCONS_00013171	NMT1	-0.121127	0.459028	416.557	8.164e-35	2.50855e-30
TCONS_00004725	ADAM12	-1.20668	1.21824	134.502	9.72709e-35	2.98874e-30
TCONS_00009779	PPP2R3C	-1.98159	1.43226	177.948	1.16493e-34	3.57912e-30
TCONS_00014936	LPIN2	-3.33607	1.10335	595.574	1.27085e-34	3.90429e-30
TCONS_00010653	HERC2P2	-1.61759	-1.18294	536.012	1.53039e-34	4.7015e-30
TCONS_00013826	PMP22	-0.721904	1.14225	137.082	2.03929e-34	6.2647e-30
TCONS_00019107	CD207	1.39977	-1.29874	127.925	2.21472e-34	6.8034e-30
TCONS_00030198	ZC3HAV1	-1.21381	0.702163	322.817	2.87999e-34	8.84676e-30
TCONS_00171125_add	ANKRD20A4	-1.75452	-0.782029	593.98	3.53836e-34	1.08688e-29
TCONS_00032386	SEMA4D	-1.01437	0.748985	278.929	3.75645e-34	1.15383e-29
TCONS_00032388	SEMA4D	1.01437	-0.748985	278.929	3.75645e-34	1.15383e-29
TCONS_00004376	NRP1	-2.4377	0.831026	481.982	3.77269e-34	1.15875e-29
TCONS_00029216	KMT2E	-1.9965	-1.1047	637.326	3.83949e-34	1.17922e-29
TCONS_00004979	CD44	2.12585	-0.596395	546.967	5.39063e-34	1.65552e-29
TCONS_00023449	RASSF1	-2.68039	0.651942	647.094	5.57896e-34	1.7133e-29
TCONS_00014011	CCL5	-2.59918	0.685118	601.54	1.78603e-33	5.48346e-29
TCONS_00014874_add	ERO1LB	-0.36142	0.977741	180.294	1.814e-33	5.56916e-29
TCONS_00010432	PML	-1.20143	0.615179	364.173	2.03437e-33	6.24551e-29
TCONS_00021719	USP41	-1.96296	1.60501	175.446	2.17527e-33	6.67786e-29
TCONS_00128972_add	RGS12	-2.42583	0.662171	571.405	2.312e-33	7.09715e-29
TCONS_00019106	CD207	-1.40278	1.26735	129.569	2.75158e-33	8.44626e-29
TCONS_00012569	RPA1	0.676937	-0.477515	402.02	4.21856e-33	1.29485e-28
TCONS_00006409	ARAP1	-0.146107	0.606211	320.085	4.41996e-33	1.35662e-28
TCONS_00103753_add	PAX3	-2.42895	1.49303	296.941	6.68908e-33	2.05301e-28
TCONS_00000382	THRAP3	-2.61201	0.646919	625.583	6.96392e-33	2.1373e-28
TCONS_00009905	ENTPD5	1.36047	-0.976176	210.75	7.7914e-33	2.39118e-28
TCONS_00017777	HK2	2.82865	-1.02955	477.519	9.01079e-33	2.76532e-28
TCONS_00000568	SRSF11	-1.16727	-0.451313	565.248	1.01622e-32	3.11857e-28
TCONS_00029447_add	OR8G1	-2.5753	1.42623	326.499	1.15174e-32	3.53423e-28
TCONS_00009906	ENTPD5	-1.37067	0.947051	221.63	1.23109e-32	3.77759e-28
TCONS_00001863	HES4	-1.78684	1.54223	132.821	1.28466e-32	3.94185e-28
TCONS_00023360	SHISA5	-1.63953	0.725629	361.52	1.43953e-32	4.41692e-28
TCONS_00009254	FBXO34	0.659647	0.571934	412.256	1.53662e-32	4.71466e-28
TCONS_00002257	STK40	-1.88461	0.698345	421.964	1.63898e-32	5.02857e-28
TCONS_00009885	ZFYVE26	0.589057	0.84811	310.444	1.80784e-32	5.54644e-28
TCONS_00026514	HAVCR2	1.69522	-0.891563	289.189	1.91858e-32	5.886e-28
TCONS_00026519	HAVCR2	-1.69522	0.891563	289.189	1.91858e-32	5.886e-28
TCONS_00030151	ZNF800	-0.308466	0.70881	263.308	2.90464e-32	8.91028e-28
TCONS_00013349	TLK2	-1.56298	-0.426421	663.754	3.07954e-32	9.4465e-28
TCONS_00002467	MCOLN2	-1.75999	-0.621533	624.902	3.3158e-32	1.01709e-27
TCONS_00022775	ATP2C1	-2.79252	0.519037	761.505	3.3766e-32	1.0357e-27
TCONS_00006255	C11orf48	-0.577681	-0.568883	398.691	4.15302e-32	1.27381e-27
TCONS_00006554	CASP1	-0.940457	-0.530961	475.777	4.25585e-32	1.30531e-27
TCONS_00009660	HNRNPC	0.709888	-0.289085	567.566	4.846e-32	1.48622e-27
TCONS_00027495	FAM26F	-1.1821	-1.16079	408.384	4.90421e-32	1.50402e-27
TCONS_00014934	LPIN2	-3.3681	0.978552	644.354	5.0245e-32	1.54086e-27
TCONS_00002343	MKNK1	-0.710196	-0.347966	553.372	5.14419e-32	1.57752e-27
TCONS_00018622	SP100	-1.0728	-0.292327	661.996	6.42004e-32	1.9687e-27
TCONS_00012433	GLG1	-0.977095	-0.40248	554.186	6.95647e-32	2.13306e-27
TCONS_00030449	SORBS3	-2.84351	0.466712	816.81	7.10492e-32	2.17851e-27
TCONS_00028753	CREB5	-2.48499	0.81141	489.533	7.57551e-32	2.32273e-27
TCONS_00016779	IGFLR1	-1.84531	-0.489577	697.025	8.07846e-32	2.47685e-27
TCONS_00013238	CDK5RAP3	-0.0376368	-0.457936	404.51	8.43175e-32	2.58509e-27
TCONS_00005169	TTC9C	-2.22661	1.23122	258.9	8.68853e-32	2.66373e-27
TCONS_00016495	CLEC4G	0.261661	0.781646	275.496	1.04016e-31	3.18873e-27
TCONS_00002260	STK40	1.4291	-0.704101	333.845	1.09004e-31	3.34142e-27
TCONS_00018188	GCA	-1.12432	-0.839659	413.457	1.15049e-31	3.52649e-27
TCONS_00029121	ZNF655	0.215899	-0.370041	463.094	1.16629e-31	3.57478e-27
TCONS_00001768	ADCK3	-1.74352	0.775667	347.441	1.22732e-31	3.76173e-27
TCONS_00019264	RNF149	-1.05751	0.487906	418.486	1.2913e-31	3.95771e-27
TCONS_00010395	KIF23	-1.46212	-1.18724	485.27	1.46567e-31	4.49198e-27
TCONS_00027019	MICA	-2.56579	0.782952	523.083	1.58056e-31	4.84395e-27
TCONS_00022749	DIRC2	-0.588385	-0.387189	501.591	2.34811e-31	7.19578e-27
TCONS_00022750	DIRC2	0.588385	0.387189	501.591	2.34811e-31	7.19578e-27
TCONS_00005728	STT3A	-3.5635	0.796146	790.892	2.87871e-31	8.82095e-27
TCONS_00015077	CD226	-1.85001	0.839929	332.124	3.45003e-31	1.05712e-26
TCONS_00003940	TSPAN14	-1.5725	0.711517	348.647	3.7151e-31	1.13831e-26
TCONS_00020972	SON	-2.02997	0.259479	823.145	5.46106e-31	1.67316e-26
TCONS_00027788	ATXN1	-1.44884	0.427408	518.65	6.13894e-31	1.88072e-26
TCONS_00018282	GLS	-2.34364	0.597923	577.813	6.19753e-31	1.89861e-26
TCONS_00006221	FADS3	-0.458494	-0.680087	329.063	6.36314e-31	1.94929e-26
TCONS_00000750	MOV10	-2.43759	0.552678	633.115	7.05958e-31	2.16256e-26
TCONS_00020830	ZBP1	-2.76185	1.25691	381.317	7.17563e-31	2.19797e-26
TCONS_00025685	APC	-2.20081	1.05153	308.132	7.28307e-31	2.2308e-26
TCONS_00032061	TRAF2	-1.6451	1.02204	218.304	7.6976e-31	2.3577e-26
TCONS_00003126	DENND1B	-2.69501	0.46099	773.601	8.91153e-31	2.72942e-26
TCONS_00033644	ARHGEF6	-0.418378	-0.578731	363.7	1.06275e-30	3.25466e-26
TCONS_00148883_add	NUDT3	0.522663	-1.43031	92.2634	1.2087e-30	3.7014e-26
TCONS_00021651	TBC1D22A	-3.14997	1.24982	494.76	1.48302e-30	4.54131e-26
TCONS_00022447	ARIH2	0.418102	-0.588076	308.147	1.5228e-30	4.66296e-26
TCONS_00025421	PARP8	0.405366	-0.721761	244.515	1.68081e-30	5.14631e-26
TCONS_00033414	SH3KBP1	-3.64299	1.13168	659.462	1.70367e-30	5.21613e-26
TCONS_00006607	FXYD6-FXYD2	-2.78797	1.14737	411.887	1.75817e-30	5.38282e-26
TCONS_00032063	TRAF2	1.62547	-1.04374	205.098	1.88845e-30	5.78148e-26
TCONS_00009780	PPP2R3C	1.51999	-1.30372	117.991	2.14243e-30	6.55885e-26
TCONS_00011549	TMEM219	0.392932	-0.418577	415.726	2.54365e-30	7.78687e-26
TCONS_00016412	MFSD12	-0.771228	-0.450743	477.804	2.75488e-30	8.43324e-26
TCONS_00025954	NPM1	-1.71612	0.288906	708.124	3.39336e-30	1.03874e-25
TCONS_00171122_add	ANKRD20A4	-2.28251	0.779629	447.363	3.49855e-30	1.07091e-25
TCONS_00007896	MMP19	-0.0652884	-1.29436	165.049	4.41843e-30	1.35239e-25
TCONS_00026289	FEM1C	2.45711	-0.96613	396.239	4.44942e-30	1.36183e-25
TCONS_00027268	FGD2	-1.54762	0.445939	514.52	4.4747e-30	1.36953e-25
TCONS_00001914	NADK	1.23586	1.21006	423.399	4.82156e-30	1.47559e-25
TCONS_00027020	MICA	-2.42391	0.630627	568.381	7.27947e-30	2.22766e-25
TCONS_00148886_add	NUDT3	-1.09734	1.49104	64.9622	8.88959e-30	2.7203e-25
TCONS_00014218	ARHGAP27	-1.17476	-0.818613	416.762	1.04077e-29	3.18475e-25
TCONS_00003309	TARBP1	-0.729763	-0.850974	317.472	1.14121e-29	3.49199e-25
TCONS_00018639	EIF4E2	-1.14064	-0.250316	704.151	1.27122e-29	3.88968e-25
TCONS_00018642	EIF4E2	1.14064	0.250316	704.151	1.27122e-29	3.88968e-25
TCONS_00022780	ATP2C1	-1.52974	-0.433413	634.142	1.32246e-29	4.0462e-25
TCONS_00013949	MYO18A	-1.53894	-0.460848	620.691	1.42527e-29	4.36047e-25
TCONS_00027875	FLOT1	-2.31269	1.40143	267.987	1.48182e-29	4.53318e-25
TCONS_00027876	FLOT1	2.31269	-1.40143	267.987	1.48182e-29	4.53318e-25
TCONS_00021670	SELO	-2.14253	0.723683	442.372	1.48609e-29	4.54593e-25
TCONS_00005034	MADD	-1.03447	0.867227	199.295	1.84091e-29	5.63115e-25
TCONS_00000982	CHTOP	-0.496697	-0.41735	455.332	2.01911e-29	6.17606e-25
TCONS_00002469	MCOLN2	0.138483	0.59946	316.314	2.0836e-29	6.37311e-25
TCONS_00014537	RHBDF2	-2.02656	0.862207	344.003	2.16445e-29	6.62018e-25
TCONS_00017256	SIGLEC5	-0.418826	-1.26981	228.276	2.18805e-29	6.69216e-25
TCONS_00028420	XLOC_008870	-0.596473	2.02746	577.369	2.34579e-29	7.17437e-25
TCONS_00015082	ZNF516	-2.73134	0.624027	648.914	2.38853e-29	7.30484e-25
TCONS_00141429_add	CLK4	-2.7253	1.14162	392.739	2.64045e-29	8.07502e-25
TCONS_00171130_add	ANKRD20A4	-1.87971	0.83528	326.846	3.08877e-29	9.44577e-25
TCONS_00005167	TTC9C	0.677933	-0.961077	150.11	4.30036e-29	1.31505e-24
TCONS_00025934	MAT2B	-0.377954	0.366014	450.331	4.68144e-29	1.43154e-24
TCONS_00018806	SF3B14	1.21782	-0.577411	358.509	7.6114e-29	2.32726e-24
TCONS_00018808	SF3B14	-1.21782	0.577411	358.509	7.6114e-29	2.32726e-24
TCONS_00016643	CACNA1A	-2.25623	1.33398	245.31	7.96501e-29	2.43522e-24
TCONS_00028826	STK17A	1.18918	0.712544	438.077	8.57379e-29	2.62126e-24
TCONS_00020130	DDX27	-3.51035	0.979026	667.03	9.80886e-29	2.99857e-24
TCONS_00000039	TNFRSF14	-0.581598	-0.399622	473.375	9.97846e-29	3.05031e-24
TCONS_00021573	APOBEC3B	-2.79351	1.19673	397.61	1.23394e-28	3.77154e-24
TCONS_00003110	DENND1B	-0.983345	-0.641218	415.285	1.39397e-28	4.26055e-24
TCONS_00018635	COPS7B	-0.164121	-0.789603	240.676	1.60178e-28	4.89553e-24
TCONS_00018435	CASP8	-1.67572	-0.753748	544.417	1.64814e-28	5.03706e-24
TCONS_00025933	MAT2B	-2.3018	0.320433	794.83	1.71956e-28	5.25515e-24
TCONS_00015796	CIC	-0.367957	-0.509301	377.327	1.78412e-28	5.45226e-24
TCONS_00003819	SGPL1	0.00807434	0.686896	261.627	1.95564e-28	5.97624e-24
TCONS_00003824	SGPL1	-0.00807434	-0.686896	261.627	1.95564e-28	5.97624e-24
TCONS_00029841	RFC2	-1.15084	-0.915334	388.115	2.82121e-28	8.62079e-24
TCONS_00021501	TRIOBP	0.364342	-0.483589	354.006	2.86451e-28	8.7528e-24
TCONS_00030925	TNFRSF10B	-2.18745	0.72933	439.934	3.16405e-28	9.66775e-24
TCONS_00017791	MAT2A	-0.877365	0.602149	302.647	4.14869e-28	1.26755e-23
TCONS_00016708	ISYNA1	1.50121	0.858352	479.692	4.25964e-28	1.30141e-23
TCONS_00017918	IL1R1	-1.9687	0.704503	404.824	5.33317e-28	1.62934e-23
TCONS_00146988_add	TIAM2	-1.88123	0.82859	321.577	5.55931e-28	1.69837e-23
TCONS_00000561	MIER1	-0.0125675	0.606495	291.54	6.13084e-28	1.87291e-23
TCONS_00013025	XLOC_004196	0.663657	-0.960876	141.492	7.45939e-28	2.27847e-23
TCONS_00010995	SIN3A	-0.299687	-0.612441	314.519	8.41911e-28	2.57145e-23
TCONS_00011983	LUC7L	-0.513519	-0.734472	297.38	8.90506e-28	2.7197e-23
TCONS_00006461	NDUFC2-KCTD14	3.59423	-1.09215	648.719	1.1503e-27	3.513e-23
TCONS_00002438	USP33	-1.18686	-0.772722	415.421	1.15064e-27	3.51392e-23
TCONS_00032048	PHPT1	-1.79702	-0.612266	607.194	1.18983e-27	3.6335e-23
TCONS_00012576	DPH1	-1.68085	0.927986	239.057	1.224e-27	3.73773e-23
TCONS_00010386	PIAS1	-1.1548	-0.42219	545.321	1.22868e-27	3.75189e-23
TCONS_00001382	BLZF1	-0.482099	-0.538006	369.429	1.30991e-27	3.9998e-23
TCONS_00022239	ATG7	-3.11594	0.859082	603.15	1.4214e-27	4.3401e-23
TCONS_00018756	ITGB1BP1	-1.75053	-0.479412	648.397	1.49421e-27	4.56227e-23
TCONS_00009724	TINF2	1.26394	0.635377	468.392	1.89685e-27	5.79109e-23
TCONS_00030565	SMIM19	-0.360573	-0.499951	374.073	1.97157e-27	6.019e-23
TCONS_00019895	RIN2	-2.45528	1.19084	307.369	2.01489e-27	6.15104e-23
TCONS_00027497	FAM26F	0.909806	0.902495	330.466	2.0242e-27	6.17926e-23
TCONS_00030879	DEFB1	-0.520917	1.9345	574.884	2.20171e-27	6.72095e-23
TCONS_00003974	IFIT1	0.19447	-0.717679	229.221	2.70138e-27	8.24597e-23
TCONS_00003975	IFIT1	-0.19447	0.717679	229.221	2.70138e-27	8.24597e-23
TCONS_00029374	TMEM140	-2.48662	1.26751	313.437	2.89523e-27	8.83712e-23
TCONS_00004419	SGMS1	-1.4557	0.580941	378.286	3.98428e-27	1.21604e-22
TCONS_00010520	AKAP13	-0.963577	0.454157	400.768	4.95033e-27	1.51084e-22
TCONS_00005062	NDUFS3	-0.491215	-1.09124	227.515	6.32988e-27	1.93182e-22
TCONS_00027523	NCOA7	-0.883681	-1.24237	333.059	6.41899e-27	1.95895e-22
TCONS_00002646	LOC653513	0.914539	-0.678911	255.317	6.51291e-27	1.98754e-22
TCONS_00002653	LOC653513	-0.914539	0.678911	255.317	6.51291e-27	1.98754e-22
TCONS_00019490	WIPF1	-1.42551	-0.421699	597.423	7.17481e-27	2.18932e-22
TCONS_00011777	CKLF-CMTM1	-1.39232	-0.301	681.244	7.54001e-27	2.30068e-22
TCONS_00028150	RPS10	-0.501739	-0.363499	477.284	7.61222e-27	2.32264e-22
TCONS_00009158	DHRS4	-1.62494	-0.440249	632.849	7.67186e-27	2.34076e-22
TCONS_00132547_add	BC016361	2.37252	-0.823699	421.922	7.79654e-27	2.37872e-22
TCONS_00006737	WNT5B	-1.00164	-0.817758	359.706	8.40068e-27	2.56296e-22
TCONS_00026154	SREK1IP1	-1.261	-0.381253	587.475	9.65189e-27	2.9445e-22
TCONS_00001865	HES4	-2.60813	1.23043	348.836	9.89503e-27	3.01858e-22
TCONS_00004412	C10orf128	-1.44378	0.568451	381.492	1.00014e-26	3.05092e-22
TCONS_00008025	NAP1L1	-1.44755	-0.199571	811.039	1.12978e-26	3.44629e-22
TCONS_00005081	TMX2-CTNND1	-0.641475	0.334989	473.49	1.43395e-26	4.37384e-22
TCONS_00022365	TRAK1	-1.01636	0.336443	508.1	1.5512e-26	4.73132e-22
TCONS_00004338	SVIL	-0.603202	-0.80057	284.614	1.69618e-26	5.17335e-22
TCONS_00023626	FRMD4B	-0.481808	-0.68627	298.757	1.85308e-26	5.65171e-22
TCONS_00166486_add	LOC100128993	-1.86896	1.44752	190.552	2.44574e-26	7.45878e-22
TCONS_00015767	AXL	-1.87207	1.27353	161.648	2.73331e-26	8.33496e-22
TCONS_00028381	REV3L	-0.734461	-1.145	278.088	2.75006e-26	8.38576e-22
TCONS_00002034	NBPF1	-0.0863363	-0.416103	396.77	2.76698e-26	8.43708e-22
TCONS_00012316	BRD7	-2.53416	1.09225	346.214	2.80553e-26	8.55406e-22
TCONS_00024178	MED28	0.490204	0.452541	408.111	2.87587e-26	8.76824e-22
TCONS_00024179	MED28	-0.490204	-0.452541	408.111	2.87587e-26	8.76824e-22
TCONS_00001641	SRGAP2	-2.44992	0.464012	672.964	3.29397e-26	1.00423e-21
TCONS_00008809	N4BP2L1	-2.12549	-0.417678	769.833	3.36796e-26	1.02676e-21
TCONS_00141432_add	CLK4	-0.529515	-0.949617	241.924	3.45756e-26	1.05404e-21
TCONS_00027111	SKIV2L	-0.801942	-0.672049	352.88	3.95674e-26	1.20613e-21
TCONS_00033209	NXT2	-0.323866	-0.868798	222.988	3.99185e-26	1.2168e-21
TCONS_00015356	PDE4A	0.896312	-1.14496	85.541	4.3647e-26	1.3304e-21
TCONS_00000601	IFI44L	-2.48549	-1.13119	781.978	4.70237e-26	1.43328e-21
TCONS_00004425	SGMS1	-1.98783	-0.582567	655.577	5.83988e-26	1.77988e-21
TCONS_00032967	SAT1	-2.64825	-0.29368	1005.57	6.02068e-26	1.83492e-21
TCONS_00010896	HERC1	-1.59506	-0.885264	488.137	6.9831e-26	2.1281e-21
TCONS_00088266_add	ANGPTL6	-0.897076	-0.679306	366.366	7.10897e-26	2.16639e-21
TCONS_00022416	CCRL2	-2.60151	0.983304	398.011	7.60899e-26	2.31869e-21
TCONS_00018503	RUFY4	-0.765909	-0.56774	383.76	8.52735e-26	2.59846e-21
TCONS_00009688	SLC7A7	-1.95333	0.792269	337.099	1.03292e-25	3.1474e-21
TCONS_00009172	RNF31	-2.07496	0.313292	725.653	1.16382e-25	3.54594e-21
TCONS_00004410	C10orf128	0.829041	-0.533885	321.392	1.21523e-25	3.70245e-21
TCONS_00014443	LOC146880	-1.51404	0.514701	422.016	1.22428e-25	3.7299e-21
TCONS_00031522	PDCD1LG2	-2.22962	1.06151	280.081	1.29376e-25	3.94143e-21
TCONS_00033210	NXT2	-2.44948	1.18232	306.958	1.40669e-25	4.28534e-21
TCONS_00012313	SIAH1	0.289124	-0.717023	212.779	1.44063e-25	4.38845e-21
TCONS_00013031	XLOC_004196	-0.660826	0.921331	136.291	1.57702e-25	4.80375e-21
TCONS_00017721	ZNF638	-1.7721	-1.1817	580.516	1.6427e-25	5.00365e-21
TCONS_00032885	XLOC_010366	0.136789	-0.682419	232.277	1.77711e-25	5.41273e-21
TCONS_00017710	GMCL1	-2.4695	1.06997	333.06	1.88233e-25	5.73302e-21
TCONS_00026293	TMED7-TICAM2	-2.99814	0.984147	500.666	1.92383e-25	5.85922e-21
TCONS_00017662	VRK2	-0.397027	0.355339	433.057	1.95792e-25	5.96264e-21
TCONS_00018613	SP140L	-2.05289	-1.2207	698.004	2.15724e-25	6.56944e-21
TCONS_00019577	CLK1	-0.976879	0.525193	338.219	2.21619e-25	6.74873e-21
TCONS_00025420	PARP8	-0.412609	0.664415	231.495	2.55656e-25	7.78474e-21
TCONS_00029203	ORAI2	0.914799	0.579189	400.571	3.34471e-25	1.01843e-20
TCONS_00165026_add	SPAG1	0.429113	-0.824015	165.871	4.36551e-25	1.32917e-20
TCONS_00012419	ST3GAL2	-1.9047	-0.28391	803.996	4.90634e-25	1.49378e-20
TCONS_00019317	WDR33	0.330619	-0.425173	370.018	5.08751e-25	1.54889e-20
TCONS_00006609	TMPRSS13	-1.67867	-0.743622	523.108	5.73694e-25	1.74644e-20
TCONS_00015543	FCHO1	-1.99747	0.981226	255.783	5.74694e-25	1.74943e-20
TCONS_00000618	IFI44L	-2.25628	-1.17476	738.623	5.98286e-25	1.82118e-20
TCONS_00030322	PRKAG2	-1.97288	-0.946898	586.757	7.02333e-25	2.13769e-20
TCONS_00031481	DOCK8	-1.08761	0.423717	422.468	7.38743e-25	2.24844e-20
TCONS_00023994	BCL6	-1.40124	-0.458211	555.109	7.55708e-25	2.29992e-20
TCONS_00006412	ARAP1	-1.46853	-0.510731	543.975	8.12749e-25	2.47344e-20
TCONS_00026690	MGAT1	-1.17492	0.564021	330.505	8.55544e-25	2.60359e-20
TCONS_00014393	LIMD2	-0.840702	-0.47963	431.414	9.09081e-25	2.76642e-20
TCONS_00003262	TMEM63A	-0.735389	-0.360315	493.852	9.18518e-25	2.79505e-20
TCONS_00023198	IQSEC1	1.51856	-0.366452	541.523	9.35231e-25	2.84581e-20
TCONS_00023201	IQSEC1	-1.51856	0.366452	541.523	9.35231e-25	2.84581e-20
TCONS_00008754	PSPC1	-2.56768	0.499213	662.863	9.53065e-25	2.89989e-20
TCONS_00032001	PRRX2	-1.08132	-1.23939	396.512	9.94567e-25	3.02597e-20
TCONS_00024918	PPM1K	1.15586	0.35358	570.752	1.06695e-24	3.24609e-20
TCONS_00024920	PPM1K	-1.15586	-0.35358	570.752	1.06695e-24	3.24609e-20
TCONS_00012720_add	RUSC1-AS1	1.24846	-1.0232	127.428	1.09268e-24	3.32414e-20
TCONS_00097378_add	TTN-AS1	1.05511	0.329826	570.935	1.15449e-24	3.51197e-20
TCONS_00097381_add	TTN-AS1	-1.05511	-0.329826	570.935	1.15449e-24	3.51197e-20
TCONS_00028057	PSMB8	-1.00797	1.01657	111.455	1.21122e-24	3.68417e-20
TCONS_00005918	TRIM5	-0.638628	-0.418396	436.516	1.22182e-24	3.7163e-20
TCONS_00000954_add	NBPF3	-1.99642	-0.743754	606.507	1.23327e-24	3.751e-20
TCONS_00171126_add	ANKRD20A4	-1.60796	-1.07054	495.563	1.26035e-24	3.83322e-20
TCONS_00023355	SHISA5	-1.4449	-0.811418	449.357	1.2893e-24	3.92114e-20
TCONS_00003142	PTPN7	-1.17077	-1.01359	369.194	1.47612e-24	4.48917e-20
TCONS_00033060	KDM6A	-2.13337	0.811648	356.169	1.53747e-24	4.67561e-20
TCONS_00009859	MAX	-2.51906	0.416288	720.326	1.59016e-24	4.83567e-20
TCONS_00010895	HERC1	-1.40478	-0.846597	434.07	1.64652e-24	5.00691e-20
TCONS_00012497	XLOC_004047	-2.18485	1.32344	285.937	1.68189e-24	5.11428e-20
TCONS_00026608	AGXT2L2	-1.13194	0.428	420.882	2.08938e-24	6.35298e-20
TCONS_00021113	NRIP1	-3.26752	0.968353	577.706	2.1142e-24	6.42801e-20
TCONS_00009704	SLC7A8	-1.22452	0.679359	265.93	2.13752e-24	6.49869e-20
TCONS_00017981	IL1RN	-0.653807	-0.319675	514.31	2.1787e-24	6.62367e-20
TCONS_00017986	IL1RN	0.653807	0.319675	514.31	2.1787e-24	6.62367e-20
TCONS_00009190	GMPR2	-1.49919	-0.470919	566.895	2.31657e-24	7.04239e-20
TCONS_00029389	LUC7L2	-0.739514	0.311988	487.228	2.44287e-24	7.42584e-20
TCONS_00003174	RAB7L1	-1.5321	-0.488166	565.777	2.45194e-24	7.45316e-20
TCONS_00026279	NREP	-2.53164	0.77957	464.961	2.8079e-24	8.5349e-20
TCONS_00014437	DDX5	-1.2887	0.450953	422.923	3.01765e-24	9.17214e-20
TCONS_00005041	MADD	-1.33668	-0.562883	486.599	3.16425e-24	9.61741e-20
TCONS_00033647	RBMX	0.367668	-0.452273	343.484	3.57475e-24	1.08647e-19
TCONS_00025587	PAPD4	-2.87347	0.964021	466.741	4.31215e-24	1.31046e-19
TCONS_00000037	TNFRSF14	-0.0844181	0.448602	348.09	4.51102e-24	1.37081e-19
TCONS_00022716	TIMMDC1	1.92174	-0.6874	374.405	4.87677e-24	1.48186e-19
TCONS_00022719	TIMMDC1	-1.92174	0.6874	374.405	4.87677e-24	1.48186e-19
TCONS_00023985	TRA2B	-1.74736	-0.350134	699.07	5.46527e-24	1.66051e-19
TCONS_00023986	TRA2B	1.74736	0.350134	699.07	5.46527e-24	1.66051e-19
TCONS_00166694_add	ZNF395	-0.406661	-0.989754	201.38	6.1431e-24	1.86634e-19
TCONS_00002111	SRSF10	0.276404	0.33748	454.209	6.44798e-24	1.95883e-19
TCONS_00029120	ZNF655	-0.215487	0.329495	442.452	6.46233e-24	1.96313e-19
TCONS_00009192	GMPR2	-1.06864	-0.477981	466.607	6.89691e-24	2.09507e-19
TCONS_00008755	PSPC1	-0.783691	-0.299689	547.058	7.3187e-24	2.22313e-19
TCONS_00027816	FAM65B	-1.86219	1.01587	209.191	9.05832e-24	2.75137e-19
TCONS_00021502	TRIOBP	-0.363816	0.443586	346.001	9.74571e-24	2.96006e-19
TCONS_00003666	CREM	-1.90932	0.506266	489.829	9.85603e-24	2.99347e-19
TCONS_00024191	RBPJ	-0.376779	-1.11302	190.35	9.87192e-24	2.9982e-19
TCONS_00029045	GTF2I	-1.95635	-0.828233	578.311	1.00552e-23	3.05376e-19
TCONS_00018230	HNRNPA3	-0.732706	-0.244058	599.436	1.1878e-23	3.60723e-19
TCONS_00019628	TNS1	-0.0649958	-1.37085	173.301	1.22715e-23	3.7266e-19
TCONS_00120198_add	LOC401074	-1.96956	0.837417	301.64	1.34191e-23	4.07497e-19
TCONS_00029595	TNRC18	-1.66496	0.263313	679.816	1.4867e-23	4.51453e-19
TCONS_00009005	ABCC4	-0.862479	0.875388	141.242	1.49499e-23	4.53953e-19
TCONS_00024198	RBPJ	-0.966354	0.610002	269.505	1.53058e-23	4.64744e-19
TCONS_00004331	SVIL	0.0748902	0.770876	199.724	1.57712e-23	4.78861e-19
TCONS_00019478	WIPF1	0.312713	0.388637	410.918	1.7634e-23	5.35386e-19
TCONS_00028948	CCT6P1	0.148905	-0.620632	242.277	1.94664e-23	5.90962e-19
TCONS_00002332	GPBP1L1	-1.43236	-0.53271	514.448	1.99007e-23	6.04105e-19
TCONS_00030930	TNFRSF10A	0.688928	-0.516722	304.491	2.06766e-23	6.27639e-19
TCONS_00030928	TNFRSF10B	-1.52855	-1.03255	463.953	2.25372e-23	6.84071e-19
TCONS_00026111	AK056817	1.12049	0.57665	426.967	2.44759e-23	7.42893e-19
TCONS_00029980	MCM7	-1.27086	-0.837017	394.217	2.57988e-23	7.82992e-19
TCONS_00010892	HERC1	-0.964063	-0.695449	354.841	2.58103e-23	7.83318e-19
TCONS_00029440_add	OR8G1	-2.34314	1.201	294.68	2.74284e-23	8.32396e-19
TCONS_00009004	ABCC4	-1.20339	-1.05405	377.39	2.81026e-23	8.5283e-19
TCONS_00005009	DGKZ	0.956618	-0.666861	235.381	2.85681e-23	8.66928e-19
TCONS_00031521	PDCD1LG2	1.00306	-0.719865	212.172	3.46997e-23	1.05293e-18
TCONS_00013443	UNK	-0.379566	-0.381604	419.567	3.96639e-23	1.20348e-18
TCONS_00033646	RBMX	-2.39031	0.397931	692.364	4.07999e-23	1.23791e-18
TCONS_00023401	USP4	-1.46264	-0.219632	756.358	4.54476e-23	1.37883e-18
TCONS_00023405	USP4	1.46264	0.219632	756.358	4.54476e-23	1.37883e-18
TCONS_00025682	APC	-0.91759	-0.847528	310.703	4.61257e-23	1.39932e-18
TCONS_00014384	BRIP1	-2.2688	0.769034	396.92	4.82881e-23	1.46487e-18
TCONS_00025981	HRH2	-1.09136	-0.747858	366.197	4.83011e-23	1.46521e-18
TCONS_00007828	CSRNP2	-1.29677	-1.12417	421.098	4.8385e-23	1.46771e-18
TCONS_00012721_add	RUSC1-AS1	-1.2599	0.963704	135.202	5.02353e-23	1.52379e-18
TCONS_00013233	CDK5RAP3	-2.78833	0.927976	451.386	5.2518e-23	1.59298e-18
TCONS_00031374	PLEC	-0.981677	-0.726741	347.453	5.49042e-23	1.66519e-18
TCONS_00004579_add	LINC00869	-1.67099	0.987193	180.665	5.5342e-23	1.67841e-18
TCONS_00166471_add	PSD3	-1.39151	0.709746	259.875	5.72951e-23	1.73759e-18
TCONS_00003913	ZMIZ1	-0.747332	0.592045	258.291	5.77447e-23	1.75117e-18
TCONS_00031688	TLE4	-1.05484	-0.331252	555.201	5.82474e-23	1.76635e-18
TCONS_00000871	VPS45	-2.83963	0.530438	696.771	5.86981e-23	1.77996e-18
TCONS_00012853	TRPV2	-1.1092	-0.665286	390.697	6.05187e-23	1.83505e-18
TCONS_00031992	PPP2R4	-2.10933	0.340811	679.178	7.13081e-23	2.16213e-18
TCONS_00026543	LCP2	-2.44229	0.548139	576.752	7.22748e-23	2.19137e-18
TCONS_00001403	PRRC2C	-0.114625	-0.3678	407.782	7.32568e-23	2.22107e-18
TCONS_00151027_add	CAHM	-1.11852	0.649156	256.329	8.62708e-23	2.61547e-18
TCONS_00004980	CD44	-2.4868	0.50533	619.794	9.91184e-23	3.00477e-18
TCONS_00096491_add	EPB41L5	-1.27728	-0.957214	386.221	1.03171e-22	3.12752e-18
TCONS_00011328	CIITA	-0.805894	-0.379005	472.057	1.2105e-22	3.66938e-18
TCONS_00012635	RABEP1	-3.12787	0.825258	588.56	1.31865e-22	3.9971e-18
TCONS_00012255	BOLA2	-0.14742	0.369136	395.038	1.33309e-22	4.04074e-18
TCONS_00024359	HERC6	-0.867887	0.513602	312.241	1.34933e-22	4.08982e-18
TCONS_00031951	SLC25A25	-2.20678	-0.813588	643.471	1.66524e-22	5.04717e-18
TCONS_00001770	ADCK3	-1.52992	-0.624053	496.168	1.76193e-22	5.34006e-18
TCONS_00028447	MAP7	-0.589093	1.20046	59.6177	1.83824e-22	5.57115e-18
TCONS_00021650	TBC1D22A	-0.514729	-1.08702	211.799	1.9373e-22	5.87117e-18
TCONS_00011334	CIITA	0.29225	0.331338	447.719	2.16799e-22	6.5701e-18
TCONS_00017261	SIGLEC5	-0.547616	1.36899	70.5206	2.22995e-22	6.75764e-18
TCONS_00011009	IMP3	-1.35747	0.726801	241.148	2.25241e-22	6.82546e-18
TCONS_00014891	ZCCHC2	-1.69622	-0.303046	710.868	2.80587e-22	8.50178e-18
TCONS_00023376	QRICH1	-1.72111	-0.308512	711.937	2.82593e-22	8.56229e-18
TCONS_00010478	ZFAND6	-1.4949	-0.715699	461.595	2.9976e-22	9.08213e-18
TCONS_00000602	IFI44L	-0.943891	-1.29412	430.093	3.12575e-22	9.47009e-18
TCONS_00014435	DDX5	0.52124	-0.412301	360.483	3.55731e-22	1.07772e-17
TCONS_00002258	STK40	-2.7466	0.346685	832.611	3.6126e-22	1.09444e-17
TCONS_00025717	SNX24	-0.0443943	-0.396919	374.366	3.67079e-22	1.11203e-17
TCONS_00010424	PML	-2.66989	0.702428	526.955	3.81783e-22	1.15654e-17
TCONS_00088331_add	ICAM3	-0.0691111	-1.17455	131.825	3.90337e-22	1.18241e-17
TCONS_00149473_add	PGM3	-1.03018	-0.354632	524.129	3.9388e-22	1.1931e-17
TCONS_00014220	ARHGAP27	-1.90341	0.457239	513.514	4.23372e-22	1.28239e-17
TCONS_00011984	LUC7L	-0.778409	0.625683	233.298	4.91108e-22	1.48752e-17
TCONS_00012314	SIAH1	-0.287431	0.675606	200.39	5.04598e-22	1.52833e-17
TCONS_00031865	RGS3	1.47424	1.18966	528.979	5.5936e-22	1.69413e-17
TCONS_00033065	UBA1	-1.69833	-0.413547	626.256	5.87196e-22	1.77838e-17
TCONS_00028756	CREB5	0.604904	-0.825562	138.348	5.88557e-22	1.78244e-17
TCONS_00024557	RXFP1	-2.48007	1.15879	348.433	5.9319e-22	1.79642e-17
TCONS_00033640	ARHGEF6	-2.62529	0.551688	613.62	6.02646e-22	1.82499e-17
TCONS_00008307	HCAR1	-1.6778	-1.05593	514.495	6.29128e-22	1.90513e-17
TCONS_00007866	CALCOCO1	0.907403	0.376099	484.209	6.47976e-22	1.96214e-17
TCONS_00006513	FAM76B	0.451361	-0.615541	226.26	6.49195e-22	1.96576e-17
TCONS_00017139	AKT1S1	-0.151367	0.327941	426.291	6.89412e-22	2.08747e-17
TCONS_00030931	TNFRSF10A	-0.690959	0.479289	316.041	7.44439e-22	2.25401e-17
TCONS_00015582	C19orf60	-0.480776	-0.45964	365.127	8.13202e-22	2.46213e-17
TCONS_00024955	UBE2D3	-0.263151	-0.338991	432.521	9.69683e-22	2.93572e-17
TCONS_00024957	UBE2D3	0.263151	0.338991	432.521	9.69683e-22	2.93572e-17
TCONS_00013131	NAGLU	-2.07986	-0.435205	710.189	1.03851e-21	3.14377e-17
TCONS_00032914	AKAP17A	-1.16689	-0.668567	391.738	1.09394e-21	3.31147e-17
TCONS_00000532	XLOC_000182	-1.97612	0.995932	224.074	1.22083e-21	3.69521e-17
TCONS_00016492	CLEC4G	-1.66381	-0.728183	497.321	1.25832e-21	3.80857e-17
TCONS_00017067	AKT1S1	0.0951797	-0.319672	432.762	1.26768e-21	3.83663e-17
TCONS_00026693	MGAT1	-0.32844	-0.285142	489.59	1.29701e-21	3.92528e-17
TCONS_00023586	HESX1	-0.378572	-1.27661	229.186	1.34111e-21	4.0586e-17
TCONS_00009556	PPP2R5C	-2.19089	-0.236703	899.898	1.38272e-21	4.1844e-17
TCONS_00012851	TRPV2	0.246869	0.64984	242.922	1.38296e-21	4.18499e-17
TCONS_00031757	NANS	-3.45873	-0.526737	1074.81	1.44535e-21	4.37364e-17
TCONS_00020202	SLC17A9	0.178837	-0.728563	178.836	1.50915e-21	4.56654e-17
TCONS_00033415	SH3KBP1	3.33787	-1.00112	586.249	1.59577e-21	4.82847e-17
TCONS_00014871_add	ERO1LB	-0.262413	-0.676897	233.435	1.74073e-21	5.26693e-17
TCONS_00012076	NAGPA	-1.64789	-0.626259	516.275	1.87662e-21	5.6779e-17
TCONS_00027579	PHACTR2	-0.427329	-0.901493	198.286	1.89984e-21	5.74797e-17
TCONS_00027580	PHACTR2	0.427329	0.901493	198.286	1.89984e-21	5.74797e-17
TCONS_00027107	CFB	-3.25484	0.979309	562.797	2.08144e-21	6.29657e-17
TCONS_00001447	CEP350	-1.99195	0.522318	474.862	2.22754e-21	6.7381e-17
TCONS_00018614	SP140L	-1.39217	-1.0072	418.051	2.31077e-21	6.98963e-17
TCONS_00030117	TFEC	-1.74991	0.528127	419.356	2.35266e-21	7.1161e-17
TCONS_00027872	PPP1R18	-0.858135	0.277569	511.878	2.50065e-21	7.56322e-17
TCONS_00002035	NBPF1	-0.170962	0.420181	341.936	2.52159e-21	7.62631e-17
TCONS_00029581	SNX8	-1.16424	0.436388	390.995	2.52178e-21	7.6266e-17
TCONS_00013904	KIAA0100	-1.3444	-0.924847	396.007	2.70885e-21	8.19211e-17
TCONS_00001353	POGK	-1.46313	-0.291487	658.725	2.76343e-21	8.35689e-17
TCONS_00180358_add	FAM122C	0.534534	-0.448715	324.359	3.04161e-21	9.19752e-17
TCONS_00013322	MSI2	-1.69847	-0.924369	492.222	3.10201e-21	9.37985e-17
TCONS_00131856_add	SLC2A9	-2.80312	0.76332	519.836	3.28093e-21	9.92022e-17
TCONS_00020829	ZBP1	-3.18155	0.95028	546.134	3.95763e-21	1.19651e-16
TCONS_00004481	DNAJC9	-1.56753	0.792423	228.636	4.31984e-21	1.30593e-16
TCONS_00007296	TMPO	-0.980636	-0.36704	495.836	4.52326e-21	1.36738e-16
TCONS_00007295	TMPO	-1.26299	0.236204	620.696	4.55375e-21	1.37655e-16
TCONS_00013154	TMEM106A	-0.44918	0.810182	136.054	4.89553e-21	1.47977e-16
TCONS_00029078	CD36	-1.87573	0.518762	448.852	5.2019e-21	1.57233e-16
TCONS_00010390	KIF23	-1.96592	-1.06414	614.917	5.51279e-21	1.66624e-16
TCONS_00013146	IFI35	-2.19592	0.256277	788.481	5.56252e-21	1.68121e-16
TCONS_00013147	IFI35	2.19592	-0.256277	788.481	5.56252e-21	1.68121e-16
TCONS_00009388	PCNX	-0.896716	0.50263	307.334	5.59168e-21	1.68992e-16
TCONS_00000600	IFI44L	-1.94146	1.0721	194.248	6.49419e-21	1.96261e-16
TCONS_00010581	MAN2A2	-1.33544	-0.373138	559.491	6.54877e-21	1.97904e-16
TCONS_00029806	VOPP1	-2.26286	0.717324	405.479	6.7822e-21	2.04951e-16
TCONS_00004703	MCMBP	-1.9701	0.623922	395.507	6.86067e-21	2.07316e-16
TCONS_00032067	C9orf142	-0.441307	-0.446261	360.16	6.9061e-21	2.08682e-16
TCONS_00009500	C14orf159	-3.32172	0.622661	748.931	7.30347e-21	2.20682e-16
TCONS_00004596_add	LINC00869	-0.531102	-0.835284	221.978	7.38619e-21	2.23174e-16
TCONS_00004405	ARHGAP22	-2.57112	0.986782	364.712	7.48941e-21	2.26285e-16
TCONS_00140169_add	LOC553103	-1.45415	-0.661252	453.05	7.65601e-21	2.31311e-16
TCONS_00016945	ERCC1	-1.27048	-0.286369	618.564	7.94294e-21	2.39972e-16
TCONS_00006281	STX5	-0.0228045	0.56001	253.965	9.83071e-21	2.96995e-16
TCONS_00005238	SAC3D1	0.137297	-1.41504	187.458	1.06999e-20	3.23245e-16
TCONS_00010194	SPRED1	0.955142	0.519185	395.804	1.10624e-20	3.34185e-16
TCONS_00000648	GBP1P1	-3.77356	0.822186	766.92	1.11111e-20	3.35643e-16
TCONS_00023018_add	ENTPD1-AS1	-1.02172	-0.986571	314.796	1.21483e-20	3.66962e-16
TCONS_00003289	TTC13	-1.06627	-0.460787	446.279	1.31363e-20	3.96796e-16
TCONS_00017302	MBOAT7	-0.602197	-0.326098	467.805	1.32321e-20	3.99676e-16
TCONS_00006616	TMPRSS13	-2.05406	0.899782	267.529	1.41543e-20	4.27488e-16
TCONS_00023393	LAMB2	-0.430949	-0.523231	311.41	1.51453e-20	4.57404e-16
TCONS_00029218	KMT2E	0.772954	0.42848	413.194	1.576e-20	4.75952e-16
TCONS_00011000	SIN3A	0.296069	0.566293	274.324	1.68677e-20	5.09387e-16
TCONS_00009214	KIAA0391	1.63806	-0.436401	461.333	1.77305e-20	5.35426e-16
TCONS_00018488	RPE	-2.65509	0.329598	810.591	1.8585e-20	5.6121e-16
TCONS_00016719	SUGP2	-0.325555	-0.328946	434.235	1.9903e-20	6.00991e-16
TCONS_00031484	DOCK8	0.784691	-0.382001	386.574	2.01015e-20	6.06965e-16
TCONS_00010477	ZFAND6	0.415396	0.43972	356.986	2.01724e-20	6.09085e-16
TCONS_00006254	C11orf48	0.5689	0.519824	329.864	2.01926e-20	6.09675e-16
TCONS_00004871	AKIP1	-2.80304	0.684118	557.726	2.40293e-20	7.25446e-16
TCONS_00010382	PIAS1	-1.87899	-0.341693	705.613	2.43268e-20	7.34403e-16
TCONS_00024585	RAPGEF2	-0.783876	-0.318077	496.917	2.78454e-20	8.40569e-16
TCONS_00008076	TMCC3	-2.80351	0.861254	465.103	2.88379e-20	8.70502e-16
TCONS_00000533	XLOC_000182	0.546257	-0.663079	188.594	2.92486e-20	8.82868e-16
TCONS_00000558	MIER1	-1.3097	-0.489455	477.959	3.1992e-20	9.65614e-16
TCONS_00019653	ATG9A	-1.80383	-0.49863	591.504	3.65796e-20	1.10405e-15
TCONS_00088332_add	ICAM3	0.0679573	1.1283	122.121	3.76095e-20	1.13502e-15
TCONS_00014461	C17orf58	-1.72968	-0.4015	624.534	3.76203e-20	1.1353e-15
TCONS_00028978	POM121	-1.90416	0.769277	292.131	3.93252e-20	1.18672e-15
TCONS_00020624	BCL2L1	-1.38174	-0.439137	519.749	3.93703e-20	1.18804e-15
TCONS_00015813	PVRL2	0.18285	-0.283658	455.867	4.0928e-20	1.235e-15
TCONS_00015815	PVRL2	-0.18285	0.283658	455.867	4.0928e-20	1.235e-15
TCONS_00026583	HK3	-1.56308	0.554775	352.509	5.30814e-20	1.60157e-15
TCONS_00007810	FMNL3	0.605035	0.41145	394.655	5.57755e-20	1.6828e-15
TCONS_00024863	ANTXR2	-1.83596	-0.879828	522.837	5.72003e-20	1.72573e-15
TCONS_00005026	DDB2	-1.91197	-0.338553	712.797	5.78726e-20	1.74596e-15
TCONS_00009177	RNF31	-1.59678	-0.40835	586.068	5.82864e-20	1.75838e-15
TCONS_00029681	HERPUD2	0.582184	0.470103	354.179	5.95546e-20	1.79652e-15
TCONS_00009620	CRIP1	-1.77498	-0.480659	590.338	6.08814e-20	1.83649e-15
TCONS_00027339	TMEM63B	-3.0324	0.718943	596.509	6.8363e-20	2.0621e-15
TCONS_00166487_add	LOC100128993	0.32538	-1.3477	111.18	6.99469e-20	2.10981e-15
TCONS_00001029	SLC27A3	-0.750146	0.803612	130.306	7.43687e-20	2.24311e-15
TCONS_00025015	ELF2	-0.591046	-0.649827	272.203	7.46239e-20	2.25073e-15
TCONS_00001748_add	AGO3	-3.23719	0.355388	941.69	8.00309e-20	2.41357e-15
TCONS_00030187	C7orf49	-4.06105	-0.425571	1293.22	8.403e-20	2.53401e-15
TCONS_00002916	ARHGEF11	-3.00241	0.387229	839.387	8.75876e-20	2.6412e-15
TCONS_00014377	LOC645638	-1.07846	0.289291	508.287	1.1322e-19	3.41381e-15
TCONS_00031802	STX17	-0.613166	-0.28835	495.798	1.34651e-19	4.05972e-15
TCONS_00031803	STX17	0.613166	0.28835	495.798	1.34651e-19	4.05972e-15
TCONS_00002109	SRSF10	-0.876659	-0.34505	481.081	1.35206e-19	4.0762e-15
TCONS_00031842	PALM2-AKAP2	-1.64892	-0.885213	468.818	1.35927e-19	4.09778e-15
TCONS_00010264	DUOX1	-1.59173	0.499282	392.754	1.54755e-19	4.66492e-15
TCONS_00016770	IGFLR1	-2.37911	0.766401	393.69	1.88317e-19	5.67587e-15
TCONS_00019627	TNS1	-0.551205	1.22696	51.7545	1.96841e-19	5.93258e-15
TCONS_00028273	TMEM30A	-2.40047	0.732542	416.518	2.1e-19	6.32898e-15
TCONS_00028275	TMEM30A	2.40047	-0.732542	416.518	2.1e-19	6.32898e-15
TCONS_00103767_add	PAX3	-2.10986	1.13914	265.017	2.1592e-19	6.50697e-15
TCONS_00033236	IL13RA1	-1.19809	0.297591	512.612	2.25012e-19	6.78075e-15
TCONS_00017525	ATRAID	-1.81787	-0.307363	708.873	2.29913e-19	6.92821e-15
TCONS_00017526	ATRAID	1.81787	0.307363	708.873	2.29913e-19	6.92821e-15
TCONS_00016559	CDC37	-1.87279	-0.344915	691.726	2.36655e-19	7.13088e-15
TCONS_00016563	CDC37	1.87279	0.344915	691.726	2.36655e-19	7.13088e-15
TCONS_00018615	SP140L	-2.75799	0.607802	584.895	2.46855e-19	7.43773e-15
TCONS_00006514	FAM76B	-0.450394	0.576387	221.149	3.00908e-19	9.06576e-15
TCONS_00018427	CASP8	-2.9754	0.70812	580.52	3.33807e-19	1.00563e-14
TCONS_00141422_add	CLK4	-1.46126	-0.396835	554.218	3.35378e-19	1.01033e-14
TCONS_00013300	LUC7L3	-0.260451	0.42798	314.21	3.40097e-19	1.02451e-14
TCONS_00014012	CCL5	2.47251	-0.661326	473.765	3.54675e-19	1.06839e-14
TCONS_00000908	MRPS21	-0.798866	-0.362743	450.176	3.56658e-19	1.07432e-14
TCONS_00011929	GSE1	-1.34373	0.445699	388.229	3.83331e-19	1.15451e-14
TCONS_00017679	UGP2	0.839778	-0.515069	275.301	4.17182e-19	1.25643e-14
TCONS_00018636	COPS7B	0.160107	0.696738	192.756	4.39024e-19	1.32216e-14
TCONS_00000140	PRDM2	0.571805	0.419264	375.196	5.07782e-19	1.52918e-14
TCONS_00001404	PRRC2C	-0.596489	0.516478	258.207	5.23488e-19	1.57643e-14
TCONS_00033564	MORF4L2	-1.16475	0.410822	389.148	5.81551e-19	1.75111e-14
TCONS_00024885	HNRPDL	-2.30383	0.431515	599.251	6.22687e-19	1.87485e-14
TCONS_00029843	RFC2	-4.20521	0.68074	961.842	6.72838e-19	2.02578e-14
TCONS_00030054	ATXN7L1	-1.53428	-0.617971	467.147	6.97084e-19	2.09864e-14
TCONS_00004724	ADAM12	-1.79747	-0.885893	508.6	7.0221e-19	2.114e-14
TCONS_00015551	ARRDC2	-1.06394	-0.485066	415.584	7.25888e-19	2.18521e-14
TCONS_00028770	ZNRF2	0.290761	-0.467985	281.009	9.61236e-19	2.89351e-14
TCONS_00010231	GANC	0.170166	-0.34166	381.713	9.96252e-19	2.99882e-14
TCONS_00005043	MADD	-1.75545	-0.658994	511.068	1.08758e-18	3.27339e-14
TCONS_00021095	PRMT2	-1.75655	0.391252	507.419	1.16167e-18	3.49628e-14
TCONS_00004250	NUDT5	0.447445	0.474636	321.08	1.19486e-18	3.59604e-14
TCONS_00032278	ANKRD20A3	-1.88992	-0.693587	539.749	1.22654e-18	3.69129e-14
TCONS_00023149	FYTTD1	2.97041	-0.760666	544.891	1.39968e-18	4.21206e-14
TCONS_00026584	HK3	-0.450175	-0.370732	391.122	1.54343e-18	4.64447e-14
TCONS_00027253	FGD2	0.361333	-0.400281	328.952	1.74784e-18	5.25924e-14
TCONS_00032000	PRRX2	1.01274	1.09742	356.595	1.92217e-18	5.78324e-14
TCONS_00082162_add	IZUMO4	-0.0856758	-0.731709	167.116	1.97689e-18	5.94768e-14
TCONS_00011718	CHD9	-2.39325	0.657734	448.455	2.08042e-18	6.25873e-14
TCONS_00011647	ITGAX	-2.40146	-0.451051	759.127	2.2089e-18	6.64502e-14
TCONS_00032927	MSL3	1.53453	-0.434213	421.847	2.4374e-18	7.33219e-14
TCONS_00017677	UGP2	-0.84437	0.479439	292.005	2.53138e-18	7.61464e-14
TCONS_00018837	OTOF	-1.93188	1.03369	195.269	2.65415e-18	7.98369e-14
TCONS_00030564	SMIM19	-0.0805074	0.457016	287.379	2.75215e-18	8.2779e-14
TCONS_00008283	HCAR1	-2.12426	0.967457	248.695	2.86332e-18	8.61171e-14
TCONS_00028472	HIVEP2	-2.25925	0.733149	370.898	3.16263e-18	9.5116e-14
TCONS_00030642	XLOC_009588	-0.482254	0.912145	78.4332	3.42573e-18	1.03025e-13
TCONS_00005225	GPR137	0.691827	-0.543868	236.637	3.71411e-18	1.11691e-13
TCONS_00027110	SKIV2L	0.786209	0.617147	299.498	3.74432e-18	1.12595e-13
TCONS_00006632	XLOC_002066	-1.71162	1.21785	237.003	3.7853e-18	1.13824e-13
TCONS_00019579	CLK1	-1.19075	0.486963	322.919	3.89024e-18	1.16976e-13
TCONS_00028885	CCM2	0.544238	-0.462892	281.888	4.77091e-18	1.43447e-13
TCONS_00021666	SELO	-1.37724	-0.264771	634.539	4.84219e-18	1.45585e-13
TCONS_00103769_add	PAX3	-1.87169	1.17198	262.877	4.92075e-18	1.47942e-13
TCONS_00081183_add	LOC100505474	-1.67831	1.2323	257.254	5.02043e-18	1.50934e-13
TCONS_00000544	AK4	-0.560597	-1.02033	202.558	5.06682e-18	1.52324e-13
TCONS_00032508	FKBP15	-1.05382	-0.565965	367.711	5.60718e-18	1.68557e-13
TCONS_00022404	CCR5	1.36672	-0.446401	378.721	5.77636e-18	1.73632e-13
TCONS_00022406	CCR5	-1.36672	0.446401	378.721	5.77636e-18	1.73632e-13
TCONS_00157040_add	ZNF862	-0.0937544	-0.399178	333.149	5.87937e-18	1.76716e-13
TCONS_00002462	GNG5	-2.46155	0.378725	679.369	6.31e-18	1.89647e-13
TCONS_00016781	IGFLR1	-1.48558	-0.377411	559.249	6.46789e-18	1.94386e-13
TCONS_00006293	ATL3	-0.868368	0.565159	233.006	6.49047e-18	1.95058e-13
TCONS_00009593	KLC1	-1.32236	-0.199933	703.905	6.81308e-18	2.04747e-13
TCONS_00028434	STX7	-1.11676	-0.4045	462.403	6.83714e-18	2.05463e-13
TCONS_00014097	DNAJC7	0.49517	0.439328	340.079	7.13383e-18	2.14362e-13
TCONS_00027240	SRSF3	2.16382	-0.5122	486.824	7.13374e-18	2.14362e-13
TCONS_00002979	PFDN2	-2.08185	-0.338668	735.41	7.18287e-18	2.15824e-13
TCONS_00008933	TBC1D4	-1.76402	-0.962227	522.06	7.38825e-18	2.21987e-13
TCONS_00024356	HERC6	-1.82632	-0.427404	609.833	7.49496e-18	2.25186e-13
TCONS_00015539	MAP1S	0.438416	-0.573419	207.189	8.44879e-18	2.53836e-13
TCONS_00014539	RHBDF2	0.622664	-0.508541	251.416	8.55327e-18	2.56966e-13
TCONS_00000713	STRIP1	-2.07977	-0.351221	724.566	8.58915e-18	2.58035e-13
TCONS_00000716	STRIP1	2.07977	0.351221	724.566	8.58915e-18	2.58035e-13
TCONS_00006269	NXF1	-0.177167	-0.551694	242.335	8.6124e-18	2.58716e-13
TCONS_00005237	SAC3D1	-0.130899	1.30743	174	9.07201e-18	2.72514e-13
TCONS_00008613	FNDC3A	1.15924	0.277648	573.655	9.67532e-18	2.90627e-13
TCONS_00026282	REEP5	0.686593	0.381509	403.365	1.05567e-17	3.1707e-13
TCONS_00010196	SPRED1	-1.94357	-0.326613	706.647	1.08476e-17	3.25786e-13
TCONS_00008610	FNDC3A	-2.68828	-0.374792	877.893	1.19621e-17	3.59247e-13
TCONS_00007807	FMNL3	-1.58946	-0.446763	537.851	1.26742e-17	3.8062e-13
TCONS_00012055	TRAP1	-2.805	0.500123	658.826	1.43654e-17	4.31363e-13
TCONS_00012759	TNFSF12-TNFSF13	-0.835695	-0.228681	573.781	1.53743e-17	4.61644e-13
TCONS_00013576	TBCD	-1.91441	-0.937094	559.577	1.62479e-17	4.87842e-13
TCONS_00022825	CDV3	-1.09562	-0.240013	601.699	1.69401e-17	5.08593e-13
TCONS_00024255	SRD5A3	2.91376	-0.888334	475.805	1.70839e-17	5.12894e-13
TCONS_00031648	ANKRD20A3	-2.60704	0.719137	458.265	1.71656e-17	5.15327e-13
TCONS_00021907	DDX17	-0.931301	0.349473	400.666	1.75965e-17	5.28228e-13
TCONS_00009770	SNX6	0.36511	-0.258309	461.105	1.86546e-17	5.59957e-13
TCONS_00011668	HEATR3	-2.62838	0.551539	569.917	1.96875e-17	5.9094e-13
TCONS_00012731	ELP5	-2.23228	-0.740595	621.759	1.97611e-17	5.93109e-13
TCONS_00002234	ZMYM6	0.250172	-0.5383	222.846	2.15879e-17	6.47918e-13
TCONS_00028059	HLA-DMB	-0.919024	-0.228042	585.437	2.29804e-17	6.89664e-13
TCONS_00028060	HLA-DMB	0.919024	0.228042	585.437	2.29804e-17	6.89664e-13
TCONS_00024884	HNRPDL	-0.276622	-0.346774	381.223	2.56883e-17	7.70854e-13
TCONS_00022444	ARIH2	-1.08748	0.362494	404.39	2.90571e-17	8.71857e-13
TCONS_00008684	FARP1	-1.5299	0.685338	237.919	3.42203e-17	1.02675e-12
TCONS_00002917	ARHGEF11	0.00305284	0.357214	354.515	3.4292e-17	1.02886e-12
TCONS_00004078	SUFU	-0.859941	-0.548549	329.31	3.57192e-17	1.07165e-12
TCONS_00009707	SLC7A8	0.326818	-0.408468	307.279	3.57586e-17	1.07279e-12
TCONS_00023219	ANKRD28	-0.0807408	-0.952427	108.534	3.71597e-17	1.11479e-12
TCONS_00019044	SPRED2	-0.462309	0.740333	122.396	3.93253e-17	1.17972e-12
TCONS_00001803	COA6	-1.59725	-0.256317	682.127	4.03964e-17	1.21177e-12
TCONS_00030168	IMPDH1	-1.72429	0.510314	383.64	4.16789e-17	1.2502e-12
TCONS_00014763	TGIF1	-3.34523	0.602918	732.101	4.39179e-17	1.31727e-12
TCONS_00019318	WDR33	-0.330093	0.345669	360.241	4.55717e-17	1.36683e-12
TCONS_00015354	PDE4A	-1.12391	0.733498	157.124	4.88856e-17	1.46608e-12
TCONS_00006557	CASP1	-1.57695	0.474381	381.702	5.37762e-17	1.61259e-12
TCONS_00005019	DGKZ	-2.53958	0.862225	374.927	5.44513e-17	1.63278e-12
TCONS_00027800	TPMT	1.47424	0.2415	669.777	5.75279e-17	1.72498e-12
TCONS_00021775	XBP1	-1.63521	-0.726753	451.887	6.55023e-17	1.96382e-12
TCONS_00006222	FADS3	0.445163	0.582917	246.786	6.9069e-17	2.07069e-12
TCONS_00025684	APC	-2.88121	0.882453	467.774	6.95159e-17	2.08402e-12
TCONS_00023686	CBLB	-1.26406	-0.37701	499.386	7.15819e-17	2.14588e-12
TCONS_00010882	VPS13C	-1.19876	0.442947	343.693	7.23747e-17	2.16957e-12
TCONS_00010883	VPS13C	1.19876	-0.442947	343.693	7.23747e-17	2.16957e-12
TCONS_00029981	MCM7	1.23353	0.762358	345.636	7.84351e-17	2.35101e-12
TCONS_00168120_add	ZFAT	-1.99164	-0.953808	602.448	7.88451e-17	2.36322e-12
TCONS_00025465	NLN	-0.554002	-0.857944	190.27	8.04045e-17	2.40988e-12
TCONS_00002968	F11R	-0.834756	-0.367122	426.358	8.37338e-17	2.50959e-12
TCONS_00024565	FNIP2	-2.05503	0.290467	663.664	8.78756e-17	2.63355e-12
TCONS_00009015	ARGLU1	0.875545	-0.450166	298.631	9.62634e-17	2.88453e-12
TCONS_00016687	MED26	0.191808	-0.250608	458.912	1.05758e-16	3.16883e-12
TCONS_00020177	NELFCD	-0.735646	0.475746	267.798	1.06517e-16	3.19147e-12
TCONS_00029388	LUC7L2	-2.52324	-0.49886	754.561	1.09394e-16	3.27757e-12
TCONS_00017460	CPSF3	-0.916625	-0.660085	294.844	1.10798e-16	3.31952e-12
TCONS_00017461	CPSF3	0.916625	0.660085	294.844	1.10798e-16	3.31952e-12
TCONS_00002329	GPBP1L1	-1.58205	0.44643	401.31	1.17336e-16	3.51505e-12
TCONS_00005224	GPR137	-0.693612	0.507182	243.007	1.18014e-16	3.53522e-12
TCONS_00020292	PCED1A	0.678931	-0.868172	74.1415	1.20733e-16	3.61656e-12
TCONS_00030474	PPP2R2A	-2.90464	0.455987	712.984	1.25344e-16	3.75455e-12
TCONS_00000453	KDM4A	1.72003	-0.756634	228.387	1.25575e-16	3.76136e-12
TCONS_00009209	FAM177A1	-1.32382	-0.263661	608.326	1.27739e-16	3.82604e-12
TCONS_00009211	FAM177A1	1.32382	0.263661	608.326	1.27739e-16	3.82604e-12
TCONS_00011706	CYLD	-2.98451	0.721975	551.17	1.37463e-16	4.11702e-12
TCONS_00004482	DNAJC9	-1.7745	-0.487474	551.855	1.44268e-16	4.32069e-12
TCONS_00012712	ACADVL	-0.0933743	0.398637	309.762	1.44512e-16	4.32785e-12
TCONS_00012721	ACADVL	0.0933743	-0.398637	309.762	1.44512e-16	4.32785e-12
TCONS_00029044	GTF2I	-2.51443	0.402152	654.434	1.51601e-16	4.53985e-12
TCONS_00011899	PLCG2	-1.12532	-0.729543	322.225	1.53859e-16	4.6073e-12
TCONS_00157032_add	ZNF862	-0.368655	0.395778	310.521	1.5744e-16	4.71437e-12
TCONS_00010953	PARP6	-1.36923	-0.323606	558.806	1.64839e-16	4.9356e-12
TCONS_00024866	ANTXR2	-1.04028	0.269672	492.562	1.6529e-16	4.94895e-12
TCONS_00004713	CTBP2	-0.863817	-0.866204	252.03	1.68573e-16	5.04675e-12
TCONS_00019897	RIN2	-1.69278	0.430732	434.179	1.68965e-16	5.05831e-12
TCONS_00033005	GK	-0.495993	-0.128773	699.149	1.81427e-16	5.43101e-12
TCONS_00033023	GK	0.495993	0.128773	699.149	1.81427e-16	5.43101e-12
TCONS_00001444	CEP350	-1.62298	0.353783	492.512	1.89807e-16	5.6815e-12
TCONS_00001897	CDK11B	-1.0974	-0.435546	422.819	1.92051e-16	5.74846e-12
TCONS_00009016	ARGLU1	-0.88176	0.41477	323.751	1.99895e-16	5.98305e-12
TCONS_00007903	MMP19	-1.16759	0.905861	86.9182	2.45185e-16	7.33717e-12
TCONS_00000508	OSBPL9	0.235937	-0.488661	240.306	2.60263e-16	7.78811e-12
TCONS_00004403	ARHGAP22	-1.37521	0.77472	160.427	2.74406e-16	8.21051e-12
TCONS_00032592	DENND1A	0.522981	-0.30861	395.031	2.8167e-16	8.42755e-12
TCONS_00008516	BRCA2	-1.53415	-0.705483	422.699	2.93898e-16	8.79314e-12
TCONS_00020976	SON	-2.32475	0.382946	620.548	2.95e-16	8.82551e-12
TCONS_00022232	ATG7	1.73952	-0.906983	170.048	3.14008e-16	9.39354e-12
TCONS_00011059	HOMER2	-0.352062	0.64779	151.605	3.37616e-16	1.00991e-11
TCONS_00029043	GTF2I	-0.981599	-0.499472	363.134	3.43072e-16	1.02616e-11
TCONS_00030314	PRKAG2	-1.72476	-0.710391	471.536	3.5724e-16	1.06851e-11
TCONS_00026375	FAM13B	-1.88786	0.657875	308.034	4.05308e-16	1.21219e-11
TCONS_00033569	MORF4L2	-0.854367	-0.606396	293.706	4.13743e-16	1.23738e-11
TCONS_00021149	TIAM1	-1.13745	-0.203059	642.676	4.21794e-16	1.26142e-11
TCONS_00019843	CDC25B	0.791598	-0.478015	263.061	4.23712e-16	1.26711e-11
TCONS_00001985	RERE	-0.899256	0.494012	260.899	4.27041e-16	1.27702e-11
TCONS_00000038	TNFRSF14	-1.62345	-0.218004	722.641	4.2821e-16	1.28048e-11
TCONS_00030475	PPP2R2A	2.87708	-0.44179	711.393	4.32783e-16	1.29411e-11
TCONS_00031880	C9orf91	-0.804238	1.05393	34.4239	4.37877e-16	1.3093e-11
TCONS_00018429	CASP8	-1.78467	0.586544	330.568	4.40035e-16	1.3157e-11
TCONS_00013976	EVI2B	-0.387735	-0.628863	211.517	4.44436e-16	1.32882e-11
TCONS_00025010	ELF2	-1.46383	-0.720538	401.12	4.49196e-16	1.34301e-11
TCONS_00017992	LOC654433	-1.14394	-0.815002	315.397	4.50825e-16	1.34783e-11
TCONS_00031209	AZIN1	-3.98523	0.48854	1000.87	4.7604e-16	1.42317e-11
TCONS_00000290	THEMIS2	1.96305	0.516475	582.903	5.0166e-16	1.49971e-11
TCONS_00000291	THEMIS2	-1.96305	-0.516475	582.903	5.0166e-16	1.49971e-11
TCONS_00017539	SLC4A1AP	-0.886048	-0.3154	468.515	5.03965e-16	1.5065e-11
TCONS_00002932	AK097921	-2.32605	0.512636	504.786	5.12064e-16	1.53066e-11
TCONS_00002933	AK097921	2.32605	-0.512636	504.786	5.12064e-16	1.53066e-11
TCONS_00029643	HNRNPA2B1	0.151674	0.314795	386.703	5.3046e-16	1.58554e-11
TCONS_00014597	SGSH	-1.10045	-0.542721	364.831	5.34795e-16	1.5984e-11
TCONS_00017557	CLIP4	-1.35861	-0.85711	373.787	5.75534e-16	1.7201e-11
TCONS_00029854	NCF1C	-2.57875	0.736965	426.917	5.94338e-16	1.77624e-11
TCONS_00028161	ETV7	-1.19747	-1.09479	532.658	5.97698e-16	1.78622e-11
TCONS_00025836	IK	0.673805	-0.385994	325.045	6.09098e-16	1.82023e-11
TCONS_00029941	SAMD9L	-0.313202	-0.706092	174.119	6.15702e-16	1.8399e-11
TCONS_00128706_add	MYL5	-1.56219	-0.475307	497.524	6.17345e-16	1.84475e-11
TCONS_00015765	AXL	-1.29148	0.942917	86.9341	6.19389e-16	1.8508e-11
TCONS_00003090	IVNS1ABP	-1.88926	0.281216	626.388	6.44229e-16	1.92496e-11
TCONS_00004636	LDB1	-1.98945	0.54564	399.3	6.92416e-16	2.0688e-11
TCONS_00007829	CSRNP2	-1.21663	-0.542209	388.039	7.24731e-16	2.16528e-11
TCONS_00018385	CFLAR	-2.21643	0.191749	842.285	7.40794e-16	2.21312e-11
TCONS_00009706	SLC7A8	-1.40525	-0.310908	569.664	7.48643e-16	2.23642e-11
TCONS_00006448	PAK1	-1.42489	-0.263682	620.242	7.5996e-16	2.27015e-11
TCONS_00006449	PAK1	1.42489	0.263682	620.242	7.5996e-16	2.27015e-11
TCONS_00011556	TAOK2	-0.442564	-0.337988	386.462	7.84099e-16	2.34202e-11
TCONS_00030924	TNFRSF10B	-1.80563	0.557868	350.816	8.05903e-16	2.40707e-11
TCONS_00033556	ARMCX6	-0.500944	-0.305872	422.281	8.30469e-16	2.48036e-11
TCONS_00015540	FCHO1	-0.245647	-0.920634	125.495	9.08438e-16	2.71305e-11
TCONS_00006177	MS4A6A	-0.113462	-0.464626	263.065	9.11911e-16	2.72333e-11
TCONS_00018698	PPP1R7	-2.38348	0.536414	498.039	9.59102e-16	2.86407e-11
TCONS_00020201	SLC17A9	-1.73037	0.94823	158.133	9.67231e-16	2.88825e-11
TCONS_00010195	SPRED1	-1.67665	-0.591335	478.934	9.69558e-16	2.8951e-11
TCONS_00025716	SNX24	0.0441334	0.355367	340.23	9.83916e-16	2.93788e-11
TCONS_00004407	ARHGAP22	-1.09161	-0.641948	325.736	1.02274e-15	3.0537e-11
TCONS_00007593	SLC6A12	-0.321606	0.902875	63.9717	1.03033e-15	3.07627e-11
TCONS_00032906	CSF2RA	1.10695	0.179041	670.092	1.09604e-15	3.27199e-11
TCONS_00023171	CIDEC	1.73005	-0.272122	600.259	1.12375e-15	3.3545e-11
TCONS_00023174	CIDEC	-1.73005	0.272122	600.259	1.12375e-15	3.3545e-11
TCONS_00015538	MAP1S	-0.437663	0.5349	203.559	1.26217e-15	3.76731e-11
TCONS_00016962	DMPK	-0.103826	-0.431669	282.549	1.26341e-15	3.77089e-11
TCONS_00025889	G3BP1	-2.18474	-0.347012	730.695	1.27015e-15	3.79089e-11
TCONS_00129180_add	TRMT44	-0.402559	-0.939709	153.328	1.29856e-15	3.87556e-11
TCONS_00007097	RAB5B	-1.40936	0.520454	301.663	1.30161e-15	3.88452e-11
TCONS_00021921	SUN2	-3.23305	0.823376	581.938	1.31134e-15	3.91344e-11
TCONS_00007349	TXNRD1	-1.77066	-0.221758	745.979	1.42535e-15	4.25338e-11
TCONS_00026924	HLA-F	-1.53886	0.282133	546.656	1.55308e-15	4.63424e-11
TCONS_00019045	SPRED2	-0.549842	-0.831522	181.711	1.55806e-15	4.64895e-11
TCONS_00032712	RALGDS	-1.50659	0.273549	551.051	1.68547e-15	5.02861e-11
TCONS_00088259_add	ANGPTL6	-1.98004	0.871124	226.168	2.00109e-15	5.97005e-11
TCONS_00031569	ACO1	-1.5836	0.510939	335.83	2.13828e-15	6.37893e-11
TCONS_00022240	ATG7	-2.29318	0.822024	314.932	2.17226e-15	6.48006e-11
TCONS_00026758	IRF4	-2.09953	-0.814805	579.702	2.32513e-15	6.93541e-11
TCONS_00018569	STK16	-0.550371	0.537966	200.203	2.69625e-15	8.04182e-11
TCONS_00009324	SLC38A6	-0.580478	-0.304268	426.334	2.77825e-15	8.28556e-11
TCONS_00016374	MKNK2	-1.45551	-0.764415	389.646	2.98438e-15	8.89971e-11
TCONS_00024464	SNHG8	0.509704	-0.655693	136.18	3.06588e-15	9.14245e-11
TCONS_00004379	CUL2	0.557319	-0.365227	326.925	3.45469e-15	1.03009e-10
TCONS_00005940	DENND5A	-2.48397	-0.273179	871.474	3.50741e-15	1.04574e-10
TCONS_00021032	SLC37A1	0.176659	-0.551858	190.08	3.74276e-15	1.11583e-10
TCONS_00006237	EML3	-0.216032	-0.30848	385.058	4.53941e-15	1.35306e-10
TCONS_00006920	KIAA1551	-0.365113	-0.315057	390.24	4.59409e-15	1.36931e-10
TCONS_00015355	PDE4A	-2.71167	0.840636	425.755	4.7431e-15	1.41368e-10
TCONS_00028255	EEF1A1	-0.337521	0.100638	740.595	4.91391e-15	1.46449e-10
TCONS_00028256	EEF1A1	0.337521	-0.100638	740.595	4.91391e-15	1.46449e-10
TCONS_00045920_add	GAS6-AS1	-1.71813	0.305066	547.824	5.20899e-15	1.55228e-10
TCONS_00008784	FLT1	-0.561671	-0.412918	331.223	5.58144e-15	1.66321e-10
TCONS_00002441	USP33	-0.730677	0.403508	301.544	5.82608e-15	1.736e-10
TCONS_00014376	LOC645638	1.06515	-0.324234	412.129	5.88424e-15	1.75327e-10
TCONS_00025835	IK	-0.676967	0.348679	346.547	6.33563e-15	1.88764e-10
TCONS_00018795	PUM2	-2.2904	0.554475	451.685	6.35035e-15	1.89196e-10
TCONS_00008707	ARHGEF7	1.42893	-0.447914	351.046	6.52266e-15	1.94323e-10
TCONS_00018384	CFLAR	-2.96557	0.352697	809.286	6.8055e-15	2.02736e-10
TCONS_00001028	SLC27A3	-0.993971	-0.622523	301.506	7.02217e-15	2.09183e-10
TCONS_00018550	SLC11A1	-1.51989	-0.627888	420.015	7.31831e-15	2.17998e-10
TCONS_00032594	DENND1A	-0.524795	0.26999	421.609	7.34264e-15	2.18715e-10
TCONS_00010391	KIF23	-1.87736	-0.88136	543.526	7.51426e-15	2.2382e-10
TCONS_00019523	ORMDL1	0.37079	-0.410039	277.822	7.54095e-15	2.24607e-10
TCONS_00010533	ISG20	-1.74887	-0.982623	627.291	7.96611e-15	2.37263e-10
TCONS_00010535	ISG20	1.74887	0.982623	627.291	7.96611e-15	2.37263e-10
TCONS_00020144	PTPN1	-0.309202	-0.278777	419.565	8.35814e-15	2.48922e-10
TCONS_00009772	SNX6	-0.36578	0.218807	482.989	8.41121e-15	2.50494e-10
TCONS_00030091	TFEC	-0.441165	-0.264806	446.874	8.44194e-15	2.51401e-10
TCONS_00010423	PML	-1.27225	-0.21206	638.681	8.45587e-15	2.51807e-10
TCONS_00023394	LAMB2	0.425448	0.477936	271.399	8.50044e-15	2.53126e-10
TCONS_00024206	STIM2	-1.34976	-0.4226	462.679	8.58337e-15	2.55587e-10
TCONS_00032701	RALGDS	-1.7504	-0.362601	594.799	9.73547e-15	2.89874e-10
TCONS_00007867	CALCOCO1	-2.75172	-0.675859	760.817	1.02906e-14	3.06384e-10
TCONS_00030495	ELP3	-0.215013	-0.321882	367.109	1.03582e-14	3.08384e-10
TCONS_00000531	XLOC_000182	-3.49271	0.499147	824.854	1.10258e-14	3.28238e-10
TCONS_00020979	ITSN1	0.406662	-0.401095	283.471	1.11289e-14	3.31297e-10
TCONS_00029173	SLC12A9	-1.47946	0.391539	405.758	1.15116e-14	3.42677e-10
TCONS_00006729	ERC1	0.410388	-0.59051	159.944	1.16603e-14	3.47081e-10
TCONS_00012640	RABEP1	0.245919	-0.572796	170.674	1.17488e-14	3.49703e-10
TCONS_00007478	RNF34	-1.7468	0.498205	367.115	1.18177e-14	3.51741e-10
TCONS_00004156	PTPRE	-1.063	0.277079	462.559	1.18329e-14	3.52183e-10
TCONS_00008883	LPAR6	-2.23749	0.375755	585.161	1.24787e-14	3.71391e-10
TCONS_00030057	ATXN7L1	-2.07469	0.326502	597.991	1.27343e-14	3.78985e-10
TCONS_00004670	SH3PXD2A	0.191759	-0.754881	96.6318	1.32434e-14	3.94123e-10
TCONS_00002610	RHOC	-0.00398298	-0.368895	311.957	1.37765e-14	4.09975e-10
TCONS_00030163	IMPDH1	1.6846	-0.53046	330.282	1.3815e-14	4.11108e-10
TCONS_00031950	SLC25A25	-1.51554	0.529368	299.907	1.40025e-14	4.16673e-10
TCONS_00029446_add	OR8G1	-2.10807	0.965341	297.886	1.50642e-14	4.48236e-10
TCONS_00014219	ARHGAP27	-1.58859	0.575013	281.51	1.54385e-14	4.59356e-10
TCONS_00019263	RNF149	0.207417	-0.237645	448.647	1.55753e-14	4.63412e-10
TCONS_00031617	CLTA	-1.22652	0.285248	474.14	1.72636e-14	5.13592e-10
TCONS_00022669	BBX	-1.16611	-0.884755	329.075	1.80508e-14	5.36958e-10
TCONS_00023304	GORASP1	1.46966	-0.908724	111.321	1.82947e-14	5.44195e-10
TCONS_00008687	FARP1	-0.584836	-1.00981	224.933	1.851e-14	5.50544e-10
TCONS_00007937	PRIM1	-2.30016	0.391316	583.041	1.88276e-14	5.5997e-10
TCONS_00022364	TRAK1	-1.15315	-0.414106	421.907	1.90458e-14	5.66441e-10
TCONS_00021722	PI4KA	-1.24679	-0.391618	455.546	1.91241e-14	5.68751e-10
TCONS_00013033	CCL4	-1.16292	0.974831	58.3121	2.13208e-14	6.34038e-10
TCONS_00066165_add	AK097472	2.36191	-0.741281	354.844	2.15707e-14	6.41425e-10
TCONS_00023102	ST6GAL1	-2.43059	0.620933	435.904	2.22024e-14	6.60166e-10
TCONS_00009627	TMEM55B	0.435119	-0.466306	231.025	2.26529e-14	6.73516e-10
TCONS_00009628	TMEM55B	-0.435119	0.466306	231.025	2.26529e-14	6.73516e-10
TCONS_00020294	PCED1A	-0.675698	0.798818	70.6822	2.38603e-14	7.09342e-10
TCONS_00013299	LUC7L3	-0.0919056	-0.35839	321.216	2.57573e-14	7.65713e-10
TCONS_00021562	APOBEC3G	-1.78193	0.953128	179.848	2.68873e-14	7.99253e-10
TCONS_00021581	APOBEC3G	1.78193	-0.953128	179.848	2.68873e-14	7.99253e-10
TCONS_00001055	UBAP2L	-1.20682	-0.225372	600.907	2.74722e-14	8.16584e-10
TCONS_00018280	GLS	0.71713	0.2577	480.118	2.81332e-14	8.36202e-10
TCONS_00009242	SAMD4A	-2.35591	0.620341	416.177	2.81618e-14	8.37024e-10
TCONS_00004990	TTC17	-1.46004	0.252918	553.826	2.81821e-14	8.376e-10
TCONS_00004867	AKIP1	-1.22936	-0.45047	414.054	2.84195e-14	8.44626e-10
TCONS_00010232	GANC	-0.1698	0.301467	367.406	3.07127e-14	9.12688e-10
TCONS_00015138	HMHA1	-0.663778	-0.6907	212.64	3.14588e-14	9.34831e-10
TCONS_00018990	CCDC88A	-2.9519	0.659775	551.829	3.2199e-14	9.56794e-10
TCONS_00018454	NRP2	-3.00499	0.331537	835.127	3.28119e-14	9.74972e-10
TCONS_00002000	CLSTN1	1.11382	0.413435	410.732	3.6363e-14	1.08038e-09
TCONS_00002002	CLSTN1	-1.11382	-0.413435	410.732	3.6363e-14	1.08038e-09
TCONS_00017613	EPAS1	-1.09831	0.413083	319.894	4.04064e-14	1.20035e-09
TCONS_00023303	GORASP1	-1.48392	0.88861	116.046	4.04248e-14	1.20086e-09
TCONS_00024416	CISD2	0.408961	-0.701938	101.709	4.18396e-14	1.24285e-09
TCONS_00027944	DDAH2	-1.25137	0.378659	371.934	4.39675e-14	1.30601e-09
TCONS_00006270	NXF1	0.175432	0.508872	219.419	4.39838e-14	1.30645e-09
TCONS_00031697	DAPK1	0.870283	-0.351669	348.954	4.49786e-14	1.33591e-09
TCONS_00031698	DAPK1	-0.870283	0.351669	348.954	4.49786e-14	1.33591e-09
TCONS_00033568	MORF4L2	-1.73493	-0.486111	512.04	4.63473e-14	1.37647e-09
TCONS_00028149	RPS10	0.495878	0.319389	385.558	4.67724e-14	1.38905e-09
TCONS_00024443	CCDC109B	-2.39023	0.322385	673.894	4.73522e-14	1.40622e-09
TCONS_00032964	SAT1	-1.57256	0.204225	647.124	5.31323e-14	1.57776e-09
TCONS_00001528	SWT1	-1.12853	-0.292465	505.908	5.54727e-14	1.6471e-09
TCONS_00029144	PILRB	-1.5103	0.566377	265.462	6.00975e-14	1.78423e-09
TCONS_00005919	TRIM5	0.629485	0.372364	355.457	6.04455e-14	1.7945e-09
TCONS_00006875	AEBP2	-0.961236	-0.403895	384.868	6.34978e-14	1.885e-09
TCONS_00026275	STARD4	-1.33611	0.425809	340.373	6.71863e-14	1.99429e-09
TCONS_00011862	DDX19A	-0.666673	0.26684	421.894	6.79497e-14	2.01688e-09
TCONS_00032066	C9orf142	0.436046	0.401829	309.216	6.81704e-14	2.02337e-09
TCONS_00033599	LAMP2	-1.33476	-0.172333	700.622	7.07683e-14	2.10033e-09
TCONS_00033600	LAMP2	1.33476	0.172333	700.622	7.07683e-14	2.10033e-09
TCONS_00006006	CD59	-1.06154	0.314811	406.961	7.23688e-14	2.14769e-09
TCONS_00026495	TNIP1	-1.23005	0.433486	316.878	7.7252e-14	2.29245e-09
TCONS_00031754	NCBP1	-0.144083	-0.342639	331.254	7.74007e-14	2.29679e-09
TCONS_00011089	C15orf38-AP3S2	-1.84768	-0.595075	501.558	7.91279e-14	2.34783e-09
TCONS_00011090	C15orf38-AP3S2	1.84768	0.595075	501.558	7.91279e-14	2.34783e-09
TCONS_00027188	RING1	-0.665332	0.445694	247.904	7.91261e-14	2.34783e-09
TCONS_00027189	RING1	0.665332	-0.445694	247.904	7.91261e-14	2.34783e-09
TCONS_00029079	CD36	0.0219906	-0.371716	297.872	8.12668e-14	2.41102e-09
TCONS_00010603	CHD2	-1.82855	-0.514091	521.508	8.16085e-14	2.42108e-09
TCONS_00000805	SRGAP2B	-0.468942	-0.331543	368.018	8.22188e-14	2.4391e-09
TCONS_00015290	PET100	-2.14342	-0.298445	734.738	8.5949e-14	2.54959e-09
TCONS_00010525	AKAP13	-2.27041	-0.695285	609.336	8.78087e-14	2.60458e-09
TCONS_00016553	RAVER1	-0.304942	-0.979381	142.734	9.49829e-14	2.81719e-09
TCONS_00014785	LINC00667	0.0220406	-0.536584	186.037	9.5441e-14	2.83068e-09
TCONS_00033106	HDAC6	0.432761	-0.528843	181.994	9.56669e-14	2.83729e-09
TCONS_00006106	FNBP4	-1.10428	0.358732	364.873	1.00055e-13	2.96733e-09
TCONS_00023277	TRANK1	-2.14189	-0.558282	590.766	1.01721e-13	3.01665e-09
TCONS_00024463	SNHG8	-0.508725	0.618705	133.753	1.02507e-13	3.03986e-09
TCONS_00005824	IRF7	-1.65634	0.315271	505.248	1.03542e-13	3.07044e-09
TCONS_00131121_add	GUCY1A3	-2.12159	0.761031	282.121	1.07205e-13	3.17895e-09
TCONS_00012483	ZDHHC7	0.482456	-0.339241	327.321	1.0782e-13	3.19709e-09
TCONS_00020929	IFNAR2	-1.08881	0.71922	119.826	1.08529e-13	3.21788e-09
TCONS_00028777	AVL9	0.736759	-0.367596	316.072	1.09337e-13	3.24174e-09
TCONS_00029387	LUC7L2	0.421826	-0.225802	459.319	1.0985e-13	3.25685e-09
TCONS_00008163	HVCN1	-1.56866	-0.677532	411.701	1.14873e-13	3.40563e-09
TCONS_00004378	CUL2	-0.559083	0.327182	341.992	1.30389e-13	3.86526e-09
TCONS_00005731	STT3A	3.22421	-0.67055	618.833	1.30494e-13	3.86824e-09
TCONS_00009776	BAZ1A	-0.00452181	0.28306	381.127	1.33761e-13	3.96495e-09
TCONS_00033645	RBMX	-0.717826	0.280334	405.007	1.38163e-13	4.09529e-09
TCONS_00029842	RFC2	1.11084	0.602209	316.301	1.45183e-13	4.30307e-09
TCONS_00004121	SEC23IP	-1.48585	-0.38638	499.289	1.453e-13	4.30641e-09
TCONS_00003191	LAMB3	-0.660932	-0.843154	191.335	1.48713e-13	4.4074e-09
TCONS_00016760	C19orf12	-1.61343	0.500475	323.834	1.61814e-13	4.79537e-09
TCONS_00013330	PRR11	0.219218	-0.29672	361.766	1.74031e-13	5.1569e-09
TCONS_00004723	ADAM12	-0.51309	-0.613552	202.292	1.74504e-13	5.17073e-09
TCONS_00024374	XLOC_007623	-1.50328	-0.593128	408.836	1.784e-13	5.28564e-09
TCONS_00003558	OPTN	1.2055	-0.337872	396.529	1.86194e-13	5.51619e-09
TCONS_00003565	OPTN	-1.2055	0.337872	396.529	1.86194e-13	5.51619e-09
TCONS_00013817	GAS7	-1.03495	0.399387	314.036	1.9422e-13	5.75337e-09
TCONS_00032224	KIAA1161	-1.99462	-0.777816	540.387	1.95913e-13	5.80335e-09
TCONS_00013816	GAS7	1.02462	-0.432905	284.441	1.96879e-13	5.83176e-09
TCONS_00016883	SERTAD3	-2.234	0.388965	554.418	1.99579e-13	5.91154e-09
TCONS_00027568	ABRACL	-1.7297	-0.295685	625.663	2.03461e-13	6.02632e-09
TCONS_00022413	CCRL2	1.36599	-0.591149	218.766	2.16905e-13	6.42408e-09
TCONS_00003496	FAM208B	-0.639765	-0.614413	220.363	2.18419e-13	6.4687e-09
TCONS_00029687	ELMO1	0.847709	0.274613	467.126	2.26631e-13	6.71168e-09
TCONS_00029690	ELMO1	-0.847709	-0.274613	467.126	2.26631e-13	6.71168e-09
TCONS_00011058	HOMER2	-0.166459	-0.652111	143.593	2.35136e-13	6.96283e-09
TCONS_00022442	ATRIP	-1.45564	0.473324	313.711	2.37952e-13	7.046e-09
TCONS_00001385	BLZF1	-2.01477	-0.424639	605.433	2.42511e-13	7.18052e-09
TCONS_00024572	RAPGEF2	-2.34239	0.636962	391.258	2.44995e-13	7.25356e-09
TCONS_00009140	BCL2L2-PABPN1	-2.15074	0.229594	726.946	2.49349e-13	7.38199e-09
TCONS_00009197	KHNYN	-1.95522	0.420956	456.84	2.5345e-13	7.50315e-09
TCONS_00009407	RBM25	-2.57407	-0.355722	803.268	2.59785e-13	7.69042e-09
TCONS_00009674	CHD8	-1.77462	0.387318	448.424	2.59814e-13	7.691e-09
TCONS_00146976_add	TIAM2	-0.749925	-0.343084	386.709	2.61222e-13	7.73244e-09
TCONS_00033401	PRKX	-1.16627	0.350177	375.524	2.78214e-13	8.23458e-09
TCONS_00033402	PRKX	1.16627	-0.350177	375.524	2.78214e-13	8.23458e-09
TCONS_00007241	MDM2	-0.883879	-0.581559	273.412	2.80451e-13	8.30021e-09
TCONS_00096490_add	EPB41L5	-1.87827	-0.823984	529.489	3.20809e-13	9.49371e-09
TCONS_00027514	PKIB	-0.990996	-0.439263	358.239	3.27078e-13	9.67888e-09
TCONS_00012434	GLG1	0.95831	0.352687	410.951	3.34699e-13	9.90375e-09
TCONS_00000688	SLC30A7	-1.93348	-0.673079	507.561	3.4184e-13	1.01147e-08
TCONS_00032349	HNRNPK	-0.666904	-0.158278	607.995	3.422e-13	1.0125e-08
TCONS_00032350	HNRNPK	0.666904	0.158278	607.995	3.422e-13	1.0125e-08
TCONS_00151022_add	CAHM	-0.870041	-0.975168	330.583	3.42389e-13	1.01299e-08
TCONS_00005863	TOLLIP	-0.348825	-0.999745	173.517	3.47833e-13	1.02906e-08
TCONS_00009408	RBM25	0.934027	0.299312	452.933	3.56043e-13	1.05332e-08
TCONS_00001042	UBAP2L	0.159786	0.224482	454.728	3.59674e-13	1.06399e-08
TCONS_00014986	SS18	-0.255874	-0.314114	355.594	3.59936e-13	1.06473e-08
TCONS_00004400	2018-03-08	-1.06056	-0.367795	417.428	3.62368e-13	1.07185e-08
TCONS_00012456	MAF	-1.97893	-0.5611	538.121	3.62858e-13	1.07326e-08
TCONS_00032120	PSIP1	-1.12869	-0.275498	510.925	3.81571e-13	1.12853e-08
TCONS_00005882	CDKN1C	-2.53559	0.770928	385.167	3.91118e-13	1.15673e-08
TCONS_00033225	DOCK11	-0.690257	-0.596403	231.298	4.13651e-13	1.22325e-08
TCONS_00026320	RAPGEF6	-0.269638	-0.243043	435.046	4.25073e-13	1.25698e-08
TCONS_00026322	RAPGEF6	0.269638	0.243043	435.046	4.25073e-13	1.25698e-08
TCONS_00009385	PCNX	-1.45892	-0.25924	594.936	4.27374e-13	1.2637e-08
TCONS_00011071	HAPLN3	-1.54187	-0.295406	576.699	4.35958e-13	1.289e-08
TCONS_00023099	ST6GAL1	0.212941	-0.434064	233.779	4.65594e-13	1.37657e-08
TCONS_00001054	UBAP2L	-2.25751	-0.190126	880.74	4.92717e-13	1.45672e-08
TCONS_00032361	ZCCHC6	-3.32957	0.439648	803.89	5.1096e-13	1.5106e-08
TCONS_00012099	GSPT1	-1.90869	0.311282	553.576	5.46295e-13	1.6149e-08
TCONS_00028727	IL6	0.0698928	1.04325	135.736	5.51263e-13	1.62953e-08
TCONS_00010526	AKAP13	-0.381735	-0.368703	315.277	5.58854e-13	1.65192e-08
TCONS_00014677	C17orf62	0.594966	-0.297915	366.044	5.64148e-13	1.66751e-08
TCONS_00018858	PPM1G	0.654003	-0.447477	233.264	5.68359e-13	1.6799e-08
TCONS_00028779	AVL9	-0.74118	0.330841	341.466	5.79764e-13	1.71349e-08
TCONS_00001579	ZC3H11A	-1.70544	-0.430538	516.716	5.88713e-13	1.73988e-08
TCONS_00004459	SAR1A	0.634733	0.268856	436.801	6.45612e-13	1.90778e-08
TCONS_00006610	TMPRSS13	-1.1056	-0.592271	309.744	6.68876e-13	1.97646e-08
TCONS_00014006	SLFN12	-2.05073	-0.722639	543.157	6.8443e-13	2.02235e-08
TCONS_00017558	CLIP4	1.31399	0.789345	345.36	6.84488e-13	2.02246e-08
TCONS_00022254	SLC6A6	1.52887	-0.522589	283.069	7.05913e-13	2.08569e-08
TCONS_00022260	SLC6A6	-1.52887	0.522589	283.069	7.05913e-13	2.08569e-08
TCONS_00027942	DDAH2	1.23336	-0.409946	323.076	7.17894e-13	2.12095e-08
TCONS_00007173	MARS	0.0816042	-0.376779	277.677	7.26791e-13	2.14709e-08
TCONS_00024560	RXFP1	1.53753	-0.961638	148.426	7.40842e-13	2.18852e-08
TCONS_00018431	CASP8	-1.23341	-0.321665	483.121	7.44656e-13	2.19971e-08
TCONS_00021438	APOL6	-0.223124	-0.33551	328.239	7.46163e-13	2.20409e-08
TCONS_00021439	APOL6	0.223124	0.33551	328.239	7.46163e-13	2.20409e-08
TCONS_00021023	MX1	-0.585471	0.156072	579.417	7.70995e-13	2.27729e-08
TCONS_00007480	RNF34	1.70533	-0.517592	318.893	7.92493e-13	2.34071e-08
TCONS_00002015	MAD2L2	-1.29232	-0.433657	416.53	8.00035e-13	2.3629e-08
TCONS_00018453	NRP2	-2.32046	-0.712149	622.286	8.03208e-13	2.37219e-08
TCONS_00007274	SOCS2	-1.9765	0.474049	409.053	8.28536e-13	2.44691e-08
TCONS_00027642	SYTL3	-0.892479	-0.867484	255.75	8.36029e-13	2.46896e-08
TCONS_00017661	VRK2	-1.16359	-0.525198	344.498	8.39296e-13	2.47853e-08
TCONS_00156112_add	BC061919	-1.04388	-0.847437	289.741	8.44402e-13	2.49352e-08
TCONS_00012198	XPO6	-2.34716	0.396874	565.979	8.4502e-13	2.49526e-08
TCONS_00009676	CHD8	-1.09116	-0.416178	384.999	8.56436e-13	2.52889e-08
TCONS_00015987	CD33	-0.0345644	-0.377847	279.855	8.60567e-13	2.541e-08
TCONS_00131846_add	SLC2A9	-0.557484	-0.257719	438.331	8.78245e-13	2.59311e-08
TCONS_00016949	RTN2	-1.01354	0.759454	84.0549	8.82204e-13	2.60471e-08
TCONS_00000169	SZRD1	-1.62778	-0.605935	428.866	9.21119e-13	2.71942e-08
TCONS_00166470_add	PSD3	-1.94793	-0.741589	516.663	9.61943e-13	2.83975e-08
TCONS_00028752	CREB5	-1.04536	0.517933	213.641	9.63887e-13	2.8454e-08
TCONS_00000201	C1QA	-1.00293	0.278115	425.372	9.97497e-13	2.94431e-08
TCONS_00013156	TMEM106A	-2.20143	-0.422039	648.899	9.98466e-13	2.94707e-08
TCONS_00016493	CLEC4G	-1.72287	-0.657799	446.033	1.02507e-12	3.0255e-08
TCONS_00020831	ZBP1	-3.72706	0.686305	758.698	1.02745e-12	3.03233e-08
TCONS_00003670	CREM	-0.580928	-0.400367	310.369	1.02918e-12	3.03733e-08
TCONS_00023817	RAB43	-2.29013	0.677305	349.469	1.03248e-12	3.04696e-08
TCONS_00005056	NDUFS3	-0.792131	0.4882	209.066	1.088e-12	3.21058e-08
TCONS_00028900	IKZF1	-1.41253	0.388242	368.441	1.11127e-12	3.27914e-08
TCONS_00016554	RAVER1	0.299667	0.941711	135.645	1.13803e-12	3.35775e-08
TCONS_00012592	ARRB2	-2.29916	0.565303	416.18	1.16277e-12	3.43053e-08
TCONS_00016636	STX10	2.21771	-0.563185	397.45	1.19994e-12	3.53995e-08
TCONS_00022446	ARIH2	-1.73463	0.333948	484.428	1.21941e-12	3.59725e-08
TCONS_00030618	C8orf44-SGK3	-3.17425	0.626029	617.354	1.23016e-12	3.62884e-08
TCONS_00019564	SF3B1	-1.54941	-0.228668	644.073	1.23233e-12	3.63513e-08
TCONS_00013927	KIAA0100	-0.94724	0.39562	294.958	1.24407e-12	3.6695e-08
TCONS_00025217	IRF2	0.530746	-0.238956	430.221	1.27167e-12	3.75067e-08
TCONS_00029880	STYXL1	-1.87889	-0.359826	599.283	1.28142e-12	3.77929e-08
TCONS_00013972	EVI2B	-2.57498	0.805867	408.259	1.36799e-12	4.03407e-08
TCONS_00028408	GOPC	-0.540469	-0.677808	175.235	1.3956e-12	4.11536e-08
TCONS_00029520	GALNT11	-3.1421	0.59579	624.528	1.48448e-12	4.37713e-08
TCONS_00021453	CSF2RB	-1.89945	0.497342	369.939	1.50567e-12	4.43947e-08
TCONS_00001570	TMEM183A	-1.15258	-0.420853	390.498	1.53714e-12	4.5321e-08
TCONS_00030637	XLOC_009588	-0.560583	-0.543401	223.952	1.57576e-12	4.64581e-08
TCONS_00020980	ITSN1	-0.40681	0.362484	284.788	1.65797e-12	4.88786e-08
TCONS_00031763	NANS	0.293065	-0.389372	258.974	1.80856e-12	5.33165e-08
TCONS_00007093	DGKA	0.596969	-0.583374	135.911	1.85213e-12	5.45972e-08
TCONS_00014860	MOCOS	-0.267707	-0.706611	126.617	1.87747e-12	5.53422e-08
TCONS_00004702	MCMBP	-1.67788	-0.589577	441.763	1.88319e-12	5.55088e-08
TCONS_00092349_add	ZNF814	-2.6684	-0.511238	741.356	1.95857e-12	5.7727e-08
TCONS_00033436	BCOR	0.824226	-0.459209	228.212	2.03793e-12	6.0064e-08
TCONS_00025582	PAPD4	-0.0774885	-0.271379	379.229	2.04614e-12	6.03037e-08
TCONS_00017813	MRPL35	-0.924119	-0.231442	514.952	2.15138e-12	6.3399e-08
TCONS_00009749	SDR39U1	-0.275561	-0.503613	206.615	2.19557e-12	6.46991e-08
TCONS_00019089	CLEC4F	-0.481967	0.628361	108.835	2.38196e-12	7.01821e-08
TCONS_00015328	C19orf66	-2.3427	0.505843	464.945	2.38679e-12	7.0322e-08
TCONS_00006924	KIAA1551	-0.0789823	0.262618	384.085	2.4516e-12	7.22265e-08
TCONS_00014191	UBTF	-2.06307	0.705163	278.068	2.5005e-12	7.36646e-08
TCONS_00129167_add	TRMT44	-1.07348	0.820639	63.7723	2.63701e-12	7.76784e-08
TCONS_00025856	KIAA0141	-0.00317956	-0.278767	366.078	2.73185e-12	8.04668e-08
TCONS_00031369	PLEC	-2.15328	0.447202	464.135	2.87696e-12	8.47352e-08
TCONS_00005864	TOLLIP	0.342561	0.964605	167.247	2.89776e-12	8.53419e-08
TCONS_00014397	LIMD2	-1.78451	0.480575	353.958	2.93418e-12	8.64085e-08
TCONS_00000167	SZRD1	-2.31945	0.60929	387.478	3.13185e-12	9.22236e-08
TCONS_00020834	ZBP1	-0.9605	-0.837328	266.449	3.18901e-12	9.39036e-08
TCONS_00027003	HLA-L	0.0656797	-0.58334	137.606	3.19604e-12	9.41074e-08
TCONS_00026643	HNRNPH1	-2.28983	0.198263	797.571	3.23448e-12	9.52328e-08
TCONS_00017724	ZNF638	-2.56263	0.549127	488.291	3.37712e-12	9.94291e-08
TCONS_00030616	C8orf44-SGK3	-1.51675	-0.535203	413.116	3.44278e-12	1.01359e-07
TCONS_00005517	ATG16L2	-1.01121	-0.478489	325.665	3.45264e-12	1.01646e-07
TCONS_00013620	PITPNA	0.239278	-0.267855	374.978	3.47554e-12	1.02316e-07
TCONS_00018700	PPP1R7	-2.11031	0.307709	592.622	3.48303e-12	1.02533e-07
TCONS_00031668	TJP2	-1.80248	0.552706	304.311	3.48341e-12	1.02541e-07
TCONS_00016686	MED26	-0.191702	0.210582	452.781	3.49146e-12	1.02775e-07
TCONS_00000512	OSBPL9	-1.69306	0.50056	318.788	3.65341e-12	1.07538e-07
TCONS_00028769	ZNRF2	-0.861975	0.400047	274.78	3.68944e-12	1.08595e-07
TCONS_00029177	SLC12A9	-1.60182	0.401577	382.164	3.83584e-12	1.12889e-07
TCONS_00020811	ZNF217	-1.45475	0.382081	373.042	3.85492e-12	1.13446e-07
TCONS_00005049	MADD	-1.72107	-0.691222	441.087	3.93776e-12	1.15876e-07
TCONS_00000806	SRGAP2B	-1.41474	-0.539685	385.875	4.15266e-12	1.22171e-07
TCONS_00020941	IFNAR1	-0.537905	-0.555433	208.969	4.28179e-12	1.25962e-07
TCONS_00000560	MIER1	-0.903511	-0.38542	359.969	4.32653e-12	1.27274e-07
TCONS_00005100	FAM111A	-1.16599	-0.460233	363.868	4.65775e-12	1.37012e-07
TCONS_00016973	PRKD2	0.645061	-0.507889	175.084	5.60922e-12	1.64967e-07
TCONS_00010654	HERC2P2	-2.17109	0.740469	290.343	5.96545e-12	1.75438e-07
TCONS_00032146	KLHL9	-1.43087	-0.475371	413.134	5.98392e-12	1.75975e-07
TCONS_00011586	ORAI3	-1.0581	-0.253664	503.149	6.02954e-12	1.77311e-07
TCONS_00000586	NEXN	0.395118	1.0766	514.384	6.16675e-12	1.8134e-07
TCONS_00004840	TIMM10B	-2.17095	-0.236995	776.912	6.28318e-12	1.84751e-07
TCONS_00019989	ACSS2	0.512208	-0.56575	134.692	6.32071e-12	1.85848e-07
TCONS_00030619	C8orf44-SGK3	-0.393014	0.439233	212.599	6.38572e-12	1.87753e-07
TCONS_00011644	ITGAX	-1.17605	0.173102	600.29	6.63113e-12	1.94962e-07
TCONS_00026366	FAM13B	-1.75529	-0.713607	453.258	6.67121e-12	1.96134e-07
TCONS_00015097	MBP	-0.174962	0.618144	111.512	6.70543e-12	1.97133e-07
TCONS_00029274	ST7	-1.50398	0.226386	564.96	6.86804e-12	2.01907e-07
TCONS_00012481	ZDHHC7	-0.483617	0.300842	338.945	7.03111e-12	2.06694e-07
TCONS_00014672_add	U4	-0.407132	-0.910752	156.787	7.10333e-12	2.0881e-07
TCONS_00007146	RBMS2	0.329126	0.250511	410.313	7.27271e-12	2.13781e-07
TCONS_00005102	FAM111A	-1.26752	0.349095	369.433	7.38696e-12	2.17132e-07
TCONS_00008711	ARHGEF7	-3.88227	0.586964	844.597	7.55936e-12	2.22192e-07
TCONS_00023590	HESX1	-1.41951	-0.868935	466.504	7.62343e-12	2.24068e-07
TCONS_00008284	HCAR1	-1.09843	-0.699111	276.663	7.78487e-12	2.2879e-07
TCONS_00017994	LOC654433	-2.34429	0.651448	365.799	8.10378e-12	2.38146e-07
TCONS_00022547	GNL3	1.5088	-0.849607	122.705	8.17093e-12	2.40103e-07
TCONS_00045922_add	GAS6-AS1	-1.1995	-0.517809	340.764	8.29784e-12	2.43824e-07
TCONS_00023415	IP6K1	-0.483881	-0.82739	146.939	8.30165e-12	2.43927e-07
TCONS_00013630	SLC43A2	-1.40007	0.576126	209.441	8.51622e-12	2.50215e-07
TCONS_00021176	DONSON	-0.644351	-0.262377	427.304	8.58666e-12	2.52267e-07
TCONS_00033234	IL13RA1	0.557832	-0.243354	412.236	8.66409e-12	2.54534e-07
TCONS_00026910	HLA-G	-1.87856	0.267912	581.826	9.06661e-12	2.66341e-07
TCONS_00018754	ITGB1BP1	0.342122	0.336007	319.693	9.31127e-12	2.73519e-07
TCONS_00015093	MBP	-0.383459	-0.563327	179.699	9.41559e-12	2.76573e-07
TCONS_00022665	ALCAM	-2.74622	0.192199	924.586	9.72985e-12	2.85775e-07
TCONS_00022666	ALCAM	2.74622	-0.192199	924.586	9.72985e-12	2.85775e-07
TCONS_00015137	HMHA1	0.651554	0.64328	191.647	9.84949e-12	2.8927e-07
TCONS_00018859	PPM1G	-0.656262	0.410998	241.718	1.02705e-11	3.01594e-07
TCONS_00003332	OPN3	1.21819	-0.522822	215.632	1.03661e-11	3.04391e-07
TCONS_00020932	IFNAR2	-0.563198	-0.390391	299.078	1.04408e-11	3.06575e-07
TCONS_00004251	NUDT5	-1.22603	-0.572696	326.133	1.04419e-11	3.06594e-07
TCONS_00030617	C8orf44-SGK3	-0.40533	-0.425859	255.649	1.06796e-11	3.13553e-07
TCONS_00004639	LDB1	-1.07114	-0.585829	288.049	1.09585e-11	3.21719e-07
TCONS_00022554	PRKCD	-1.5869	0.324385	449.24	1.13584e-11	3.33437e-07
TCONS_00020853	HELZ2	-0.570942	-0.371176	313.597	1.16886e-11	3.4312e-07
TCONS_00023911	CCNL1	-0.75372	-0.236066	470.899	1.2496e-11	3.66758e-07
TCONS_00015975	CLEC11A	1.455	-0.705747	147.276	1.25394e-11	3.68018e-07
TCONS_00026603	DOK3	-1.66015	-0.710001	424.843	1.29095e-11	3.78856e-07
TCONS_00000454	KDM4A	-2.02451	0.669434	277.084	1.30547e-11	3.83102e-07
TCONS_00001582	ZC3H11A	-1.85495	0.20872	662.958	1.3143e-11	3.85681e-07
TCONS_00020322	SIGLEC1	-0.275837	-0.242475	411.606	1.41867e-11	4.16239e-07
TCONS_00020380	SIGLEC1	0.275837	0.242475	411.606	1.41867e-11	4.16239e-07
TCONS_00018590	RHBDD1	0.12164	0.36785	272.831	1.4191e-11	4.16334e-07
TCONS_00018591	RHBDD1	-0.12164	-0.36785	272.831	1.4191e-11	4.16334e-07
TCONS_00026030	LINC00847	-1.4536	-0.306218	522.829	1.42837e-11	4.19028e-07
TCONS_00009965	SMEK1	-0.592018	-0.283951	393.31	1.43535e-11	4.21059e-07
TCONS_00033435	BCOR	-0.82924	0.424348	241.622	1.44384e-11	4.23536e-07
TCONS_00028233_add	LRTOMT	-1.88876	-0.711215	492.277	1.45873e-11	4.27874e-07
TCONS_00014442	LOC146880	-0.0013726	-0.261454	374.206	1.47228e-11	4.3182e-07
TCONS_00004398	2018-03-08	0.315764	0.395251	265.451	1.53162e-11	4.49193e-07
TCONS_00009386	PCNX	0.057973	-0.288082	341.393	1.56665e-11	4.59437e-07
TCONS_00015798	CIC	-0.592193	0.386729	254.982	1.5928e-11	4.67057e-07
TCONS_00031367	PLEC	-2.07399	0.412697	463.559	1.59602e-11	4.67984e-07
TCONS_00033591	RPL39	0.357411	-0.447119	199.679	1.6008e-11	4.69372e-07
TCONS_00031618	CLTA	1.20784	-0.318469	386.914	1.62383e-11	4.76106e-07
TCONS_00012462	CMC2	-0.0167289	0.338698	290.979	1.6331e-11	4.7881e-07
TCONS_00025943	NPM1	1.67148	-0.315725	473.242	1.64708e-11	4.82891e-07
TCONS_00008515	BRCA2	1.48257	0.632495	373.325	1.64957e-11	4.83603e-07
TCONS_00019839	ATRN	0.329156	-0.306618	320.792	1.70134e-11	4.98764e-07
TCONS_00019525	ORMDL1	-1.46158	0.322344	424.633	1.73833e-11	5.09574e-07
TCONS_00008470	ZMYM2	0.069184	-0.443019	205.59	1.75466e-11	5.14344e-07
TCONS_00049295_add	PLEKHH1	-1.09014	0.657919	117.471	1.76822e-11	5.18264e-07
TCONS_00023275	TRANK1	-1.25495	0.427928	288.22	1.81728e-11	5.3261e-07
TCONS_00175029_add	PRUNE2	-2.18817	0.701986	302.629	1.83133e-11	5.36707e-07
TCONS_00013859	FLII	-1.05754	-0.279058	467.116	1.83785e-11	5.386e-07
TCONS_00003172	RAB7L1	-1.51902	0.756224	137.817	1.85141e-11	5.42556e-07
TCONS_00012319	BRD7	-1.06155	-0.538321	298.388	1.87009e-11	5.48012e-07
TCONS_00011345	RMI2	-1.76178	-0.272337	624.976	1.90318e-11	5.5767e-07
TCONS_00012095	GSPT1	-1.02772	-0.283083	457.334	1.92039e-11	5.62673e-07
TCONS_00002339	MKNK1	-0.391659	-0.251627	406.708	1.98069e-11	5.80323e-07
TCONS_00014005	SLFN12	-1.54747	0.354154	405.622	2.00406e-11	5.87148e-07
TCONS_00018931	SRSF7	0.314311	-0.28709	340.64	2.02928e-11	5.94497e-07
TCONS_00007344	TXNRD1	-0.696944	0.118968	655.604	2.2146e-11	6.48724e-07
TCONS_00015361	ILF3	-1.72202	0.458992	343.868	2.24715e-11	6.5819e-07
TCONS_00024162	FAM200B	-0.82184	-0.270164	435.669	2.35009e-11	6.88318e-07
TCONS_00024382	RAP1GDS1	0.214315	-0.275245	351.399	2.49383e-11	7.30294e-07
TCONS_00006798	EMG1	-1.76276	-0.258815	637.302	2.51223e-11	7.35632e-07
TCONS_00007590	SLC6A12	-2.13257	0.56078	359.022	2.54043e-11	7.43864e-07
TCONS_00014674_add	U4	-0.073759	0.891685	59.5482	2.60259e-11	7.62038e-07
TCONS_00027721	EXOC2	-1.61502	-0.346199	522.59	2.6645e-11	7.80112e-07
TCONS_00022546	GNL3	-1.54241	0.815133	131.921	2.72907e-11	7.98991e-07
TCONS_00011692	ADCY7	-1.26922	0.198929	557.144	2.73948e-11	8.01984e-07
TCONS_00014187	ATXN7L3	0.623351	-0.30541	331.67	2.82169e-11	8.25965e-07
TCONS_00006291	ATL3	-0.0923806	-0.396012	243.545	2.83183e-11	8.28905e-07
TCONS_00012009	HAGH	-1.09716	-0.245591	507.995	2.90692e-11	8.50856e-07
TCONS_00025372	NIPBL	-1.90708	-0.227231	708.567	2.98052e-11	8.7234e-07
TCONS_00015952	PRMT1	-1.87868	-0.389461	557.57	3.13599e-11	9.17778e-07
TCONS_00032542_add	CREBZF	-1.48489	-0.564839	382.895	3.22972e-11	9.45177e-07
TCONS_00015363	ILF3	-0.933472	-0.40871	335.039	3.23997e-11	9.48145e-07
TCONS_00015774	HNRNPUL1	-1.8055	-0.300351	604.881	3.31909e-11	9.71232e-07
TCONS_00000165	SZRD1	-1.44816	-0.576933	370.657	3.34242e-11	9.78026e-07
TCONS_00010822	DMXL2	-2.20564	0.210839	736.445	3.51354e-11	1.02796e-06
TCONS_00003920	ZMIZ1	-2.23518	-0.748904	630.06	3.52175e-11	1.03032e-06
TCONS_00020971	SON	-1.97724	0.215426	672.631	3.54296e-11	1.03646e-06
TCONS_00021495	SH3BP1	-2.30222	0.586631	381.703	3.77447e-11	1.10411e-06
TCONS_00031128	NBN	-2.38751	0.711578	352.987	3.783e-11	1.10657e-06
TCONS_00005639	RBM7	-0.307182	-0.228914	424	3.96545e-11	1.15989e-06
TCONS_00022451	WDR6	0.264803	-0.793338	41.0855	3.99955e-11	1.16983e-06
TCONS_00009880	TMEM229B	-2.49559	0.67932	389.112	4.1015e-11	1.19956e-06
TCONS_00019483	WIPF1	-1.21406	-0.229332	547.287	4.16755e-11	1.21884e-06
TCONS_00017924	IL1R1	-0.337363	-0.550482	169.403	4.19628e-11	1.2272e-06
TCONS_00004676	XPNPEP1	-2.35313	0.689609	347.407	4.44418e-11	1.29966e-06
TCONS_00141333_add	LOC202181	-1.42375	-0.530517	376.204	4.46247e-11	1.30496e-06
TCONS_00028977	POM121	-1.75036	-0.412924	508.439	4.47466e-11	1.30848e-06
TCONS_00033478	WDR45	1.07062	-0.737225	75.5108	4.68201e-11	1.36907e-06
TCONS_00016823	HNRNPL	-2.68757	-0.228602	916.576	4.71396e-11	1.37836e-06
TCONS_00028815	STARD3NL	-1.92417	0.479492	364.958	4.73183e-11	1.38354e-06
TCONS_00016322	ZNF8	-2.06302	-0.234553	736.112	4.75179e-11	1.38928e-06
TCONS_00022390	TCAIM	-1.29654	0.376299	333.177	4.82566e-11	1.41083e-06
TCONS_00004421	SGMS1	-1.29435	-0.690083	319.967	4.89025e-11	1.42967e-06
TCONS_00003308	TARBP1	-0.814071	-0.711962	205.241	5.08782e-11	1.48732e-06
TCONS_00016410	MFSD12	-1.18471	0.291028	406.083	5.24627e-11	1.53359e-06
TCONS_00024161	CPEB2	0.00753968	0.259285	367.172	5.30882e-11	1.55182e-06
TCONS_00014678	C17orf62	-1.51737	0.293845	459.627	5.31419e-11	1.55334e-06
TCONS_00058483_add	ST20	-0.737779	-0.599569	208.695	5.32825e-11	1.55739e-06
TCONS_00011931	GSE1	-1.02684	-0.543505	282.356	5.38715e-11	1.5745e-06
TCONS_00026848	KDM1B	-0.0444211	-0.463395	188.947	5.45222e-11	1.59347e-06
TCONS_00018938	SOS1	-1.30527	0.388001	322.629	5.4791e-11	1.60121e-06
TCONS_00010709	GOLGA8B	-2.5925	0.642959	426.974	5.89474e-11	1.72262e-06
TCONS_00002611	RHOC	0.0039632	0.328307	291.544	5.91855e-11	1.72952e-06
TCONS_00017966	TTL	-2.008	-0.27493	676.002	5.92236e-11	1.73057e-06
TCONS_00024570	FNIP2	0.263159	-0.271975	349.037	5.9364e-11	1.73462e-06
TCONS_00021699	HIRA	-1.86003	0.233452	612.766	5.9368e-11	1.73467e-06
TCONS_00006229	AHNAK	-1.27005	0.259225	458.856	6.1536e-11	1.7979e-06
TCONS_00029059	RHBDD2	-0.615626	-0.271058	398.619	6.43044e-11	1.87872e-06
TCONS_00008038_add	WASH7P	-0.315331	0.26163	361.841	6.63049e-11	1.93703e-06
TCONS_00004849	PPFIBP2	-0.265606	-0.33976	294.77	6.82513e-11	1.99376e-06
TCONS_00020052	SRSF6	-2.28639	0.385674	530.086	6.82773e-11	1.99445e-06
TCONS_00028404	GOPC	-2.01814	0.477961	384.57	6.85635e-11	2.00274e-06
TCONS_00140866_add	SAP30L-AS1	0.793961	-0.690823	68.5178	7.08393e-11	2.06907e-06
TCONS_00140867_add	SAP30L-AS1	-0.793961	0.690823	68.5178	7.08393e-11	2.06907e-06
TCONS_00014907	CNDP2	-1.86643	-0.242819	672.796	7.11648e-11	2.07844e-06
TCONS_00013626	SLC43A2	0.253825	-0.412547	213.336	7.11849e-11	2.07895e-06
TCONS_00004730	STK32C	-1.45027	0.31185	423.475	7.19226e-11	2.10043e-06
TCONS_00004942	PRRG4	-2.05286	0.591119	314.641	7.26862e-11	2.12266e-06
TCONS_00020508	CENPB	-2.10246	-0.624995	539.249	7.33212e-11	2.14113e-06
TCONS_00020509	CENPB	2.10246	0.624995	539.249	7.33212e-11	2.14113e-06
TCONS_00000870	VPS45	2.66555	-0.499429	531.222	7.3364e-11	2.14223e-06
TCONS_00003500	FAM208B	-1.93228	0.673089	246.197	7.43836e-11	2.17193e-06
TCONS_00014600	SGSH	1.07502	0.488518	311.763	7.88315e-11	2.30133e-06
TCONS_00004630	MGEA5	0.801724	-0.780415	38.246	8.01562e-11	2.33984e-06
TCONS_00016974	PRKD2	-0.646602	0.472216	178.988	8.28888e-11	2.41944e-06
TCONS_00016341	TMEM259	-1.97278	-0.518363	517.244	8.39605e-11	2.45047e-06
TCONS_00000810	SRGAP2B	-1.0018	0.271917	400.2	8.56128e-11	2.49861e-06
TCONS_00005516	ATG16L2	-0.854977	0.35501	291.355	8.69779e-11	2.53836e-06
TCONS_00023624	FRMD4B	-1.24339	0.51814	206.199	9.10058e-11	2.65573e-06
TCONS_00026465	CD74	-0.498953	0.0915033	714.654	9.1402e-11	2.6672e-06
TCONS_00026466	CD74	0.498953	-0.0915033	714.654	9.1402e-11	2.6672e-06
TCONS_00017938	LIMS1	0.701169	0.20322	494.127	9.18257e-11	2.67938e-06
TCONS_00008708	ARHGEF7	-1.51885	0.291482	458.345	9.30867e-11	2.71608e-06
TCONS_00009144	BCL2L2-PABPN1	-0.730004	-0.243058	443.195	9.44311e-11	2.75512e-06
TCONS_00022397	EXOSC7	-1.28558	-0.356721	430.946	9.60655e-11	2.80271e-06
TCONS_00028333	PNISR	-0.941461	-0.395704	336.625	9.67155e-11	2.82158e-06
TCONS_00032902	CSF2RA	-1.73544	-0.185332	716.368	9.75399e-11	2.84553e-06
TCONS_00029133	STAG3	-0.681177	0.429878	211.005	9.77158e-11	2.85057e-06
TCONS_00020618	BCL2L1	0.506913	0.225222	439.246	1.00492e-10	2.93135e-06
TCONS_00146284_add	TRAF3IP2-AS1	-1.04507	-0.695674	256.039	1.0065e-10	2.93586e-06
TCONS_00012844	ADORA2B	2.44099	-0.728445	374.846	1.01498e-10	2.96049e-06
TCONS_00025047	CTSO	-1.47031	0.311791	424.263	1.04027e-10	3.03405e-06
TCONS_00020719	OSER1	-1.88406	-0.254314	661.148	1.05336e-10	3.07213e-06
TCONS_00003267	TMEM63A	-1.72181	0.666939	201.352	1.11254e-10	3.24439e-06
TCONS_00019991	ACSS2	-0.511934	0.529654	134.015	1.117e-10	3.25729e-06
TCONS_00002074	EIF4G3	-1.08869	0.222776	478.522	1.13744e-10	3.31678e-06
TCONS_00013571	TBCD	-1.34166	0.494928	235.413	1.13866e-10	3.32021e-06
TCONS_00159333_add	GTF2IP1	-1.11052	-0.760148	288.484	1.15025e-10	3.3539e-06
TCONS_00017269	SIGLEC14	-1.3519	0.69147	124.389	1.15511e-10	3.36797e-06
TCONS_00011814	FAM65A	-0.223449	-0.760517	91.5781	1.15635e-10	3.37145e-06
TCONS_00008922	INTS6	-0.158812	-0.226449	409.714	1.16944e-10	3.40949e-06
TCONS_00018831	DTNB	0.404854	-0.46607	171.699	1.1795e-10	3.4387e-06
TCONS_00051482_add	LOC100506499	-0.277551	-0.433054	219.705	1.20543e-10	3.5142e-06
TCONS_00011798	CBFB	-0.698825	-0.452315	259.714	1.22406e-10	3.56839e-06
TCONS_00011794	CBFB	-1.11775	0.409728	269.419	1.22762e-10	3.57863e-06
TCONS_00023416	IP6K1	0.475192	0.787997	137.698	1.23716e-10	3.60633e-06
TCONS_00030001	LRCH4	-2.01421	0.28619	569.077	1.26211e-10	3.67881e-06
TCONS_00014839	DTNA	0.565629	-0.306694	314.264	1.32517e-10	3.86247e-06
TCONS_00014840	DTNA	-0.565629	0.306694	314.264	1.32517e-10	3.86247e-06
TCONS_00021389_add	FAM171A1	-0.941105	-0.874852	361.672	1.32748e-10	3.86893e-06
TCONS_00029774	HUS1	-0.948229	-0.184126	556.801	1.3533e-10	3.94406e-06
TCONS_00023661	CGGBP1	-3.5698	0.339408	936.775	1.37959e-10	4.02013e-06
TCONS_00021097	PRMT2	-0.0948514	-0.201325	442.916	1.40551e-10	4.09551e-06
TCONS_00005241	VPS51	-2.12263	-0.586161	543.198	1.49082e-10	4.34306e-06
TCONS_00022319	MLH1	-1.31439	0.309587	396.188	1.55172e-10	4.51969e-06
TCONS_00015845	CLASRP	-1.51867	-0.240812	586.178	1.57345e-10	4.58282e-06
TCONS_00028232_add	LRTOMT	-1.41304	-0.753797	378.759	1.57654e-10	4.59166e-06
TCONS_00020243	C20orf96	0.573104	-0.549438	121.616	1.58654e-10	4.62063e-06
TCONS_00033477	WDR45	-1.07663	0.710458	78.72	1.63539e-10	4.76258e-06
TCONS_00013946	MYO18A	-0.236748	-0.349735	276.564	1.67728e-10	4.88439e-06
TCONS_00025495	SMA4	-0.536757	-0.382525	280.097	1.70364e-10	4.961e-06
TCONS_00012202	XPO6	-0.84885	-0.232908	468.275	1.70531e-10	4.9657e-06
TCONS_00006179	MS4A6A	-2.14864	0.351344	523.369	1.73077e-10	5.03965e-06
TCONS_00030962	PPAPDC1B	-0.64982	-0.234893	437.966	1.77044e-10	5.15498e-06
TCONS_00031867	ZNF618	-1.80797	0.633544	231.968	1.77498e-10	5.16804e-06
TCONS_00009406	RBM25	-1.31027	-0.239172	542.519	1.78061e-10	5.18425e-06
TCONS_00021219	ICOSLG	-1.54523	0.305945	440.621	1.81805e-10	5.2929e-06
TCONS_00023932	RPL22L1	-1.31013	-0.349803	435.846	1.90944e-10	5.55856e-06
TCONS_00008390	SCARB1	-1.40139	-0.251279	546.61	1.94072e-10	5.64942e-06
TCONS_00011200	NDUFB10	-1.67199	-0.231487	630.988	1.94219e-10	5.65334e-06
TCONS_00019956	FRG1B	-0.271335	0.546588	118.748	1.96118e-10	5.70841e-06
TCONS_00004675	XPNPEP1	2.27138	-0.685023	324.93	2.05331e-10	5.97574e-06
TCONS_00017223	VRK3	0.425651	-0.316749	293.16	2.06128e-10	5.99874e-06
TCONS_00022896	TSC22D2	-1.22025	-0.451411	352.207	2.17095e-10	6.31726e-06
TCONS_00018563	FAM134A	0.718369	-0.38262	245.844	2.29331e-10	6.67284e-06
TCONS_00011365	NDE1	0.667513	-0.270739	358.348	2.38415e-10	6.93667e-06
TCONS_00019788	RBCK1	-0.71215	0.219233	433.142	2.42555e-10	7.05664e-06
TCONS_00010910_add	C1orf173	-0.80683	0.688319	61.9002	2.45729e-10	7.14852e-06
TCONS_00032650	SH3GLB2	-0.426541	-0.269054	369.219	2.46786e-10	7.17901e-06
TCONS_00009199	KHNYN	1.89549	-0.436671	380.233	2.59132e-10	7.53738e-06
TCONS_00025752	PHF15	-2.79219	0.663738	477.621	2.73519e-10	7.95529e-06
TCONS_00016371	ABHD17A	-1.75824	-0.300052	576.725	2.75732e-10	8.01938e-06
TCONS_00030126	CTTNBP2	0.175437	-0.574336	104.545	2.75781e-10	8.02055e-06
TCONS_00021964	NAGA	-1.31884	0.216499	517.592	2.78878e-10	8.10978e-06
TCONS_00021496	SH3BP1	-0.944988	0.248657	413.195	3.1008e-10	9.01497e-06
TCONS_00033306	FMR1	-2.09454	0.576836	323.266	3.10291e-10	9.02079e-06
TCONS_00021923	SUN2	-1.03168	-0.63241	250.801	3.12773e-10	9.09261e-06
TCONS_00014186	ATXN7L3	-0.626525	0.267765	356.57	3.1494e-10	9.155e-06
TCONS_00018549	SLC11A1	1.4708	0.56006	366.645	3.32071e-10	9.6513e-06
TCONS_00012392	DPEP2	-0.830719	0.638035	82.8037	3.42641e-10	9.95784e-06
TCONS_00004631	MGEA5	-0.802157	0.751469	38.5074	3.43662e-10	9.98717e-06
TCONS_00030044	SRPK2	-1.48768	0.213338	551.835	3.44938e-10	1.00239e-05
TCONS_00015594	ARMC6	-0.483762	-0.537596	177.89	3.46311e-10	1.00634e-05
TCONS_00008813	N4BP2L2	-2.0078	-0.65335	513.906	3.52923e-10	1.02549e-05
TCONS_00000907	MRPS21	0.786043	0.316734	362.133	3.55355e-10	1.03248e-05
TCONS_00002483	CCBL2	-0.960174	-0.495993	274.378	3.66013e-10	1.06334e-05
TCONS_00008785	FLT1	0.554231	0.368736	286.379	3.66428e-10	1.06451e-05
TCONS_00007092	DGKA	-0.597869	0.512552	137.798	3.68282e-10	1.06986e-05
TCONS_00011405	LOC23117	-0.660763	0.214827	431.848	3.71298e-10	1.07855e-05
TCONS_00012463	CMC2	-1.46369	-0.430731	412.922	3.80692e-10	1.10576e-05
TCONS_00001438	TOR1AIP1	-3.30558	0.43673	752.797	3.81467e-10	1.10797e-05
TCONS_00011155	NME4	-0.42847	-0.563313	159.012	3.83336e-10	1.11332e-05
TCONS_00018834	HADHA	-1.38297	0.37434	332.366	3.8749e-10	1.12535e-05
TCONS_00008701	TNFSF13B	1.03624	0.257881	461.681	3.96928e-10	1.15268e-05
TCONS_00008702	TNFSF13B	-1.03624	-0.257881	461.681	3.96928e-10	1.15268e-05
TCONS_00005558	PCF11	-0.311223	-0.244739	384.323	4.0838e-10	1.18585e-05
TCONS_00029703	XLOC_009295	-2.07131	0.293458	563.686	4.14842e-10	1.20458e-05
TCONS_00017684	AFTPH	0.478844	0.32054	316.893	4.3713e-10	1.26907e-05
TCONS_00004722	ADAM12	-0.872844	-0.662427	211.671	4.40481e-10	1.27876e-05
TCONS_00007177	MARS	-0.0812852	0.336845	264.419	4.42068e-10	1.28332e-05
TCONS_00151012_add	CAHM	-1.86367	0.634189	238.517	4.42721e-10	1.28517e-05
TCONS_00004964	HIPK3	-2.70511	-0.413557	755.471	4.50269e-10	1.30704e-05
TCONS_00001354	POGK	-0.82696	0.42576	212.864	4.52431e-10	1.31327e-05
TCONS_00006063	AMBRA1	2.25898	0.589214	578.719	4.53994e-10	1.31776e-05
TCONS_00032531_add	CREBZF	-1.34061	0.425305	277.9	4.72333e-10	1.37085e-05
TCONS_00004147	DOCK1	-2.05138	-0.597569	517.936	4.80979e-10	1.3958e-05
TCONS_00008173	NAA25	-1.46982	0.30935	414.222	4.81045e-10	1.39594e-05
TCONS_00007240	MDM2	0.625799	0.467794	229.183	4.86618e-10	1.41207e-05
TCONS_00009903	HEATR4	0.63713	0.658345	164.109	4.87272e-10	1.41392e-05
TCONS_00032362	ZCCHC6	-1.42575	-0.387586	427.189	4.94751e-10	1.43557e-05
TCONS_00021224	PTTG1IP	-0.793817	-0.545053	221.471	4.95822e-10	1.43863e-05
TCONS_00021225	PTTG1IP	0.793817	0.545053	221.471	4.95822e-10	1.43863e-05
TCONS_00021908	DDX17	-0.859938	-0.452591	274.579	5.18673e-10	1.50478e-05
TCONS_00028084	XLOC_008759	0.305898	0.581589	134.086	5.28684e-10	1.53371e-05
TCONS_00021183	RUNX1	-1.81435	-0.214558	678.476	5.35988e-10	1.55485e-05
TCONS_00016971	PTGIR	0.282409	0.710829	97.9195	5.40592e-10	1.56815e-05
TCONS_00032265	PAX5	1.70789	-0.761907	180.106	5.54467e-10	1.60834e-05
TCONS_00030810	GPAA1	0.122504	-0.769397	43.5554	5.67426e-10	1.64588e-05
TCONS_00025289	AHRR	-0.299035	-0.708667	100.395	5.67717e-10	1.64666e-05
TCONS_00029135	STAG3	-1.55533	-0.635495	379.757	5.76485e-10	1.67198e-05
TCONS_00025979	HRH2	0.788841	0.393981	297.529	5.80101e-10	1.68241e-05
TCONS_00022672	BBX	-2.00331	0.586587	292.211	5.85138e-10	1.69696e-05
TCONS_00031993	PPP2R4	2.03272	-0.356248	480.25	5.85427e-10	1.69774e-05
TCONS_00011805	E2F4	-1.64374	-0.285638	555.933	5.95135e-10	1.72577e-05
TCONS_00009754	SDR39U1	0.27265	0.461877	187.724	6.18947e-10	1.79476e-05
TCONS_00004447	JMJD1C	-0.497185	-0.481939	201.787	6.19267e-10	1.79563e-05
TCONS_00002607	ADORA3	0.649051	0.406391	267.465	6.22745e-10	1.80559e-05
TCONS_00020286	SNRPB	-1.1706	-0.191406	570.378	6.35169e-10	1.84148e-05
TCONS_00021826	PISD	-0.518565	-0.306859	330.917	6.43406e-10	1.8653e-05
TCONS_00004456	SAR1A	-1.0665	-0.229106	497.655	6.43703e-10	1.86603e-05
TCONS_00024721	ARAP2	-2.05338	0.248038	616.51	6.47463e-10	1.87686e-05
TCONS_00101819_add	PAX8	-1.18028	-0.638691	282.107	6.4841e-10	1.87955e-05
TCONS_00128717_add	MYL5	-1.50396	-0.451111	408.014	6.50985e-10	1.88694e-05
TCONS_00023836	PLXND1	-1.42218	0.329723	380.151	6.52721e-10	1.89191e-05
TCONS_00007941	PRIM1	0.581082	-0.299002	309.951	6.68721e-10	1.93809e-05
TCONS_00030457	KIAA1967	-2.1108	-0.53804	538.339	6.75735e-10	1.95835e-05
TCONS_00004158	PTPRE	-1.46685	-0.364764	449.049	6.80917e-10	1.9733e-05
TCONS_00174394_add	GBA2	-0.725585	-0.340752	326.611	6.89434e-10	1.99791e-05
TCONS_00009092	TOX4	-1.30218	-0.343296	428.369	6.97904e-10	2.02225e-05
TCONS_00033592	RPL39	-0.357032	0.40902	197.5	7.15488e-10	2.07313e-05
TCONS_00026349	SAR1B	1.74032	0.363337	514.811	7.23412e-10	2.09601e-05
TCONS_00018154	2018-03-07	-1.51564	0.393781	332.206	7.32039e-10	2.12094e-05
TCONS_00014027	TBC1D3G	-1.66643	-0.747599	484.819	7.50201e-10	2.17348e-05
TCONS_00032266	PAX5	-1.73501	0.749076	186.573	7.52313e-10	2.17953e-05
TCONS_00018833	HADHA	-0.929414	-0.344235	354.959	7.8624e-10	2.27774e-05
TCONS_00023191	RAF1	-2.48499	-0.199027	874.514	7.86821e-10	2.27934e-05
TCONS_00021577	APOBEC3B	-1.47357	0.853693	200.72	7.95308e-10	2.30377e-05
TCONS_00031755	NCBP1	0.143143	0.301568	302.39	8.15268e-10	2.36142e-05
TCONS_00011555	TAOK2	0.437883	0.295236	331.708	8.24487e-10	2.38796e-05
TCONS_00008235	CAMKK2	-0.926213	0.406663	232.992	8.31232e-10	2.40733e-05
TCONS_00011717	CHD9	-1.7654	-0.602391	434.992	8.32068e-10	2.40967e-05
TCONS_00030496	ELP3	0.213463	0.280465	328.784	8.44928e-10	2.44683e-05
TCONS_00032165	MOB3B	-2.14481	0.365206	494.437	8.76718e-10	2.5388e-05
TCONS_00000435	SMAP2	-2.56495	0.458688	517.004	8.78751e-10	2.5446e-05
TCONS_00029535	RBM33	-0.409029	-0.193572	458.681	8.87645e-10	2.57026e-05
TCONS_00021461	KCTD17	-0.57193	-0.198254	466.95	9.03493e-10	2.61606e-05
TCONS_00006238	EML3	0.214512	0.267081	343.445	9.05926e-10	2.62302e-05
TCONS_00029189	TRIM56	0.866027	-0.619699	86.6011	9.23328e-10	2.67331e-05
TCONS_00028899	UPP1	-1.89773	-0.343824	566.286	9.30969e-10	2.69525e-05
TCONS_00015666	USF2	-0.336586	-0.333604	284.236	9.39858e-10	2.72089e-05
TCONS_00012575	DPH1	-2.39286	0.60068	379.262	9.43063e-10	2.73007e-05
TCONS_00000295	SESN2	0.400187	-0.52299	118.37	9.51673e-10	2.7549e-05
TCONS_00029094	GATAD1	-0.466998	-0.483252	193.22	9.99863e-10	2.8943e-05
TCONS_00002608	ADORA3	-1.30193	-0.45912	354.253	1.00001e-09	2.89464e-05
TCONS_00008931	TBC1D4	-0.467344	0.642463	59.1994	1.00882e-09	2.92003e-05
TCONS_00020942	IFNAR1	0.529894	0.51157	187.467	1.01303e-09	2.93212e-05
TCONS_00023294	LRRFIP2	-0.734587	-0.550135	203.608	1.05079e-09	3.04121e-05
TCONS_00012593	ARRB2	-0.391594	-0.255507	369.215	1.05655e-09	3.05776e-05
TCONS_00018935	SRSF7	-0.896628	0.213431	448.667	1.07217e-09	3.10287e-05
TCONS_00024239	SLAIN2	-0.11275	-0.318682	281.133	1.07925e-09	3.12324e-05
TCONS_00027200	PFDN6	-1.15184	-0.491727	306.539	1.09193e-09	3.15983e-05
TCONS_00014217	ARHGAP27	-2.50891	0.642758	397.934	1.10387e-09	3.19427e-05
TCONS_00024380	RAP1GDS1	-0.618808	0.211892	423.331	1.12021e-09	3.24143e-05
TCONS_00138902_add	PRLR	-1.61489	0.845349	305.755	1.1214e-09	3.24477e-05
TCONS_00003311	IRF2BP2	-4.38565	0.353777	1157.45	1.12626e-09	3.25872e-05
TCONS_00157574_add	MICALL2	-1.23569	0.241081	453.999	1.1305e-09	3.27089e-05
TCONS_00005340	PACS1	-0.537139	-0.692477	138.731	1.14379e-09	3.30911e-05
TCONS_00008084	CDK17	0.547216	-0.305376	296.043	1.1481e-09	3.32146e-05
TCONS_00033617	RAP2C	1.14157	-0.608121	118.574	1.15772e-09	3.34917e-05
TCONS_00030302	FASTK	-2.07027	0.393839	446.04	1.15891e-09	3.35248e-05
TCONS_00006503	SMCO4	-1.9192	0.431342	377.453	1.17054e-09	3.38591e-05
TCONS_00009879	TMEM229B	-2.23257	0.394766	484.324	1.20502e-09	3.48529e-05
TCONS_00012396	DPEP2	-0.581278	-0.71683	147.921	1.24215e-09	3.59243e-05
TCONS_00011808	FAM65A	0.220446	0.723606	84.31	1.24387e-09	3.59727e-05
TCONS_00013707	PELP1	-0.621466	-0.484888	211.885	1.2461e-09	3.60358e-05
TCONS_00033458	UXT	-2.01396	-0.304781	624.773	1.26067e-09	3.64548e-05
TCONS_00011898	PLCG2	-0.919462	0.789137	35.9574	1.31629e-09	3.80605e-05
TCONS_00003187	IL10	0.313898	-0.380858	214.04	1.36746e-09	3.95388e-05
TCONS_00016454	SAFB2	-0.940764	-0.270022	420.842	1.40061e-09	4.04958e-05
TCONS_00026696	MGAT1	-1.98227	-0.446188	526.102	1.42481e-09	4.1194e-05
TCONS_00016295	CCDC106	-0.93271	-0.285471	403.172	1.42991e-09	4.13401e-05
TCONS_00025052	FAM198B	-1.03904	-0.378668	343.735	1.43216e-09	4.14037e-05
TCONS_00030703	AK001351	-1.50469	0.751839	132.56	1.44218e-09	4.16919e-05
TCONS_00005859	CHID1	-0.757204	-0.196612	488.047	1.44252e-09	4.17003e-05
TCONS_00009823	NIN	-0.748883	0.267854	353.019	1.46582e-09	4.23725e-05
TCONS_00024285	RUFY3	-0.237598	-0.393459	222.774	1.48779e-09	4.30046e-05
TCONS_00015057	TCF4	-0.829893	0.349423	270.035	1.49166e-09	4.31148e-05
TCONS_00015393	SMARCA4	-0.350203	-0.717361	104.155	1.50692e-09	4.35531e-05
TCONS_00018886_add	AGAP9	-1.18712	-0.229363	511.803	1.52854e-09	4.41748e-05
TCONS_00008826	SUPT20H	-0.809154	-0.258885	411.706	1.53425e-09	4.43383e-05
TCONS_00005905	NUP98	0.892081	-0.121123	635.641	1.61303e-09	4.66084e-05
TCONS_00005908	NUP98	-0.892081	0.121123	635.641	1.61303e-09	4.66084e-05
TCONS_00033491	IQSEC2	-1.8661	-0.319384	572.106	1.62466e-09	4.69398e-05
TCONS_00002067	EIF4G3	-0.113318	-0.282303	315.179	1.63283e-09	4.7174e-05
TCONS_00016542	DNMT1	0.479712	0.320707	305.146	1.64082e-09	4.74032e-05
TCONS_00018386	CFLAR	-3.0958	0.355785	756.418	1.67312e-09	4.83331e-05
TCONS_00030311	PRKAG2	-1.08251	0.395754	254.578	1.67972e-09	4.85219e-05
TCONS_00012382	CENPT	-1.65799	0.217009	566.053	1.6873e-09	4.87394e-05
TCONS_00033659	CD99L2	-4.1103	0.383968	1036.09	1.68866e-09	4.8777e-05
TCONS_00027666	WTAP	-1.21574	0.160702	586.878	1.69328e-09	4.89088e-05
TCONS_00016895	DEDD2	-2.11074	-0.350836	612.4	1.70888e-09	4.93575e-05
TCONS_00031583	NFX1	0.170982	-0.185286	444.193	1.722e-09	4.97348e-05
TCONS_00023995	BCL6	-2.4241	0.344583	580.549	1.79894e-09	5.19481e-05
TCONS_00028432	STX7	1.09254	0.353788	369.756	1.81432e-09	5.23886e-05
TCONS_00021397	GAS2L1	-2.47624	0.377803	559.805	1.82197e-09	5.26077e-05
TCONS_00016948	ERCC1	0.103724	0.373548	227.172	1.82488e-09	5.26899e-05
TCONS_00022320	MLH1	1.29247	-0.340775	337.148	1.83372e-09	5.29431e-05
TCONS_00027871	PPP1R18	0.118726	-0.179489	453.585	1.85779e-09	5.36344e-05
TCONS_00173849_add	ZDHHC21	-0.535403	-0.395343	250.204	1.86826e-09	5.39349e-05
TCONS_00012057	TRAP1	2.63685	-0.474088	518.153	1.87231e-09	5.40499e-05
TCONS_00013645	RILP	1.40622	-0.646853	135.005	1.92223e-09	5.54834e-05
TCONS_00013646	RILP	-1.40622	0.646853	135.005	1.92223e-09	5.54834e-05
TCONS_00014425	ICAM2	-2.2242	0.560251	352.197	1.95352e-09	5.63805e-05
TCONS_00004341	SVIL	-1.87481	-0.442686	496.463	1.96339e-09	5.66634e-05
TCONS_00007662	CLECL1	-1.58075	-0.320553	499.476	1.99134e-09	5.74661e-05
TCONS_00015934	RCN3	-1.98191	-0.667299	520.634	2.06134e-09	5.94778e-05
TCONS_00009852	TRMT5	0.747859	-0.480951	152.2	2.06538e-09	5.95924e-05
TCONS_00032537	FBXW2	-0.00832332	-0.824434	65.7583	2.07874e-09	5.99757e-05
TCONS_00018564	FAM134A	-0.722309	0.346629	260.141	2.08202e-09	6.00683e-05
TCONS_00011002	SNUPN	-2.47555	0.646549	389.285	2.11634e-09	6.10543e-05
TCONS_00017682	AFTPH	-1.7079	-0.393531	478.374	2.1449e-09	6.18738e-05
TCONS_00025412	ZNF131	0.354144	-0.330843	256.122	2.14614e-09	6.19075e-05
TCONS_00028332	PNISR	0.520623	0.318662	308.96	2.19167e-09	6.32108e-05
TCONS_00060246_add	GFER	0.408031	0.631826	121.969	2.19155e-09	6.32108e-05
TCONS_00060247_add	GFER	-0.408031	-0.631826	121.969	2.19155e-09	6.32108e-05
TCONS_00107809_add	BCAS4	-1.14939	-0.531761	286.256	2.2029e-09	6.35315e-05
TCONS_00004399	2018-03-08	-1.62143	-0.308407	518	2.29863e-09	6.62878e-05
TCONS_00019094	CLEC4F	-2.22601	0.615555	325.989	2.3147e-09	6.6749e-05
TCONS_00016769	IGFLR1	-1.21772	0.216644	481.586	2.31878e-09	6.68643e-05
TCONS_00012764	TNFSF12-TNFSF13	-1.04649	0.195221	491.481	2.32064e-09	6.69157e-05
TCONS_00013624	PITPNA	-0.239247	0.228311	374.142	2.32373e-09	6.70023e-05
TCONS_00026695	MGAT1	-1.72205	-0.210522	648.366	2.35259e-09	6.78298e-05
TCONS_00023084	EIF4A2	-1.27521	0.235115	462.479	2.35414e-09	6.78723e-05
TCONS_00035771_add	PHC1	-2.05013	0.243241	610.823	2.42809e-09	7.00019e-05
TCONS_00032158	MIR31HG	2.13245	-0.75025	381.147	2.45498e-09	7.07747e-05
TCONS_00010961	ADPGK	2.73604	-0.138287	992.137	2.50297e-09	7.21531e-05
TCONS_00010964	ADPGK	-2.73604	0.138287	992.137	2.50297e-09	7.21531e-05
TCONS_00032913	AKAP17A	-0.26552	0.3284	255.054	2.67345e-09	7.70488e-05
TCONS_00004989	TTC17	1.43008	-0.284092	421.57	2.75152e-09	7.92907e-05
TCONS_00010784	DUOXA1	-1.49821	-0.444686	397.457	2.96428e-09	8.54126e-05
TCONS_00017681	AFTPH	-1.27627	-0.199767	563.773	2.99034e-09	8.61576e-05
TCONS_00024869	RASGEF1B	-0.00589165	-0.307011	278.719	3.02002e-09	8.70097e-05
TCONS_00029977	ZNF394	-1.41043	-0.207768	579.497	3.04024e-09	8.75894e-05
TCONS_00008338	NCOR2	-0.585381	0.232664	380.258	3.05122e-09	8.79025e-05
TCONS_00004729	STK32C	1.42196	-0.34121	353.808	3.08903e-09	8.89889e-05
TCONS_00001600	SRGAP2	-1.90652	-0.12538	845.13	3.09142e-09	8.90545e-05
TCONS_00012032	RNPS1	-0.134579	-0.277809	315.267	3.10219e-09	8.93618e-05
TCONS_00031302	ASAP1	-1.20568	-0.201529	547.058	3.11242e-09	8.96533e-05
TCONS_00012068	CDIP1	-2.49438	0.570038	414.638	3.1393e-09	9.04244e-05
TCONS_00016394	LSM7	-1.723	-0.335018	517.955	3.18506e-09	9.1736e-05
TCONS_00006931	PPHLN1	-1.31595	-0.343842	417.401	3.19965e-09	9.21533e-05
TCONS_00031915	RABEPK	-1.2049	-0.373598	372.524	3.24425e-09	9.34343e-05
TCONS_00103755_add	PAX3	-0.224024	-0.945689	440.891	3.25055e-09	9.36094e-05
TCONS_00025427	SNX18	-0.647474	0.569659	88.1384	3.30606e-09	9.5198e-05
TCONS_00025428	SNX18	0.647474	-0.569659	88.1384	3.30606e-09	9.5198e-05
TCONS_00002432	CRYZ	-1.04545	-0.299436	401.311	3.34216e-09	9.6231e-05
TCONS_00007276	SOCS2	0.321129	-0.497544	122.087	3.35634e-09	9.66358e-05
TCONS_00027027	MICA	-1.4595	0.330976	370.656	3.35879e-09	9.67031e-05
TCONS_00029008	LIMK1	0.496928	-0.261959	334.296	3.36354e-09	9.68363e-05
TCONS_00029009	LIMK1	-0.496928	0.261959	334.296	3.36354e-09	9.68363e-05
TCONS_00006331	MAP3K11	-1.99459	0.395232	417.406	3.38995e-09	9.75864e-05
TCONS_00013310	XLOC_004279	0.483662	0.922226	573.779	3.43431e-09	9.886e-05
TCONS_00019297	XLOC_006057	0.483662	0.922226	573.779	3.43431e-09	9.886e-05
TCONS_00030809	GPAA1	-0.121424	0.736157	39.5041	3.47633e-09	0.000100059
TCONS_00022162	CHKB-CPT1B	-1.96759	0.431785	378.216	3.55633e-09	0.000102358
TCONS_00007836	CSRNP2	-1.73632	0.554919	238.921	3.6899e-09	0.000106195
TCONS_00013132	COASY	-1.12217	0.288345	363.191	3.73081e-09	0.000107369
TCONS_00009462	VASH1	0.152233	0.239649	360.781	3.76088e-09	0.000108231
TCONS_00009463	VASH1	-0.152233	-0.239649	360.781	3.76088e-09	0.000108231
TCONS_00008601	FNDC3A	-1.5595	-0.190466	635.517	3.8042e-09	0.00010947
TCONS_00033641	ARHGEF6	0.156991	0.282572	309.087	3.84984e-09	0.000110779
TCONS_00008676_add	PLEKHG5	-0.805297	-0.5175	218.049	3.89935e-09	0.0001122
TCONS_00011547	TMEM219	-0.795622	-0.195086	485.921	4.10912e-09	0.000118219
TCONS_00029822_add	SIGIRR	-0.734154	-0.468596	227.17	4.2525e-09	0.000122336
TCONS_00029190	TRIM56	-0.869637	0.589282	89.7069	4.27862e-09	0.000123079
TCONS_00019305	BIN1	-2.51665	0.538224	435.719	4.28456e-09	0.000123245
TCONS_00018933	SRSF7	-1.85999	0.196343	636.847	4.28988e-09	0.000123394
TCONS_00002349	EFCAB14	-1.98187	-0.19957	722.41	4.3121e-09	0.000124029
TCONS_00000200	C1QA	0.36834	-0.227413	372.797	4.35083e-09	0.000125139
TCONS_00014020	CCL23	-1.66426	-0.114658	811.526	4.35772e-09	0.000125332
TCONS_00014021	CCL23	1.66426	0.114658	811.526	4.35772e-09	0.000125332
TCONS_00023850	ANAPC13	-1.76062	-0.194812	674.344	4.36171e-09	0.000125439
TCONS_00025046	CTSO	1.44097	-0.340827	354.235	4.40844e-09	0.000126778
TCONS_00007106	RAB5B	-0.27011	-0.52954	134.722	4.43092e-09	0.00012742
TCONS_00000765	DCLRE1B	-0.296026	-0.358277	245.015	4.49454e-09	0.000129231
TCONS_00019635	CXCR2P1	-1.49192	-0.175619	643.132	4.49569e-09	0.00012926
TCONS_00033438	CXorf38	-0.371025	-0.406915	214.939	4.62743e-09	0.000133034
TCONS_00020663	EDEM2	-0.566743	-0.224058	413.392	4.6293e-09	0.000133083
TCONS_00006333	MAP3K11	-1.03917	-0.299682	396.468	4.82518e-09	0.0001387
TCONS_00005577	PANX1	-1.5218	0.290968	424.828	4.83723e-09	0.000139041
TCONS_00005580	PANX1	1.5218	-0.290968	424.828	4.83723e-09	0.000139041
TCONS_00025753	PHF15	-0.574521	0.269938	325.214	4.9317e-09	0.000141747
TCONS_00026842	KDM1B	0.0441147	0.423613	176.553	5.1164e-09	0.00014704
TCONS_00009553	EVL	-2.1071	-0.164418	809.75	5.19443e-09	0.000149278
TCONS_00013341	VMP1	-1.15191	0.239249	429.173	5.22368e-09	0.000150113
TCONS_00031709	SPIN1	-1.7673	-0.257747	594.182	5.28331e-09	0.000151816
TCONS_00031712	SPIN1	1.7673	0.257747	594.182	5.28331e-09	0.000151816
TCONS_00033557	ARMCX6	0.495443	0.263105	355.079	5.39179e-09	0.000154917
TCONS_00008356	NCOR2	-0.933263	-0.227471	457.554	5.41971e-09	0.000155714
TCONS_00021368	HSCB	-0.967227	-0.294926	387.2	5.43389e-09	0.000156116
TCONS_00006100	FNBP4	-0.0618595	-0.299797	282.476	5.52928e-09	0.000158851
TCONS_00006834	ETV6	-1.12286	0.729981	63.5361	5.55808e-09	0.000159672
TCONS_00028725	IL6	-1.71696	-0.668178	446.078	5.60185e-09	0.000160924
TCONS_00011363	NDE1	-1.78209	0.299538	466.241	5.61726e-09	0.000161361
TCONS_00004806	TSPAN4	-2.10839	-0.579969	527.138	5.80786e-09	0.000166831
TCONS_00032098	CBWD1	-1.41928	-0.329646	445.292	5.88035e-09	0.000168901
TCONS_00013847	SREBF1	-0.595144	-0.393914	248.366	5.89378e-09	0.000169281
TCONS_00024019	TNK2	-0.478091	0.271243	315.886	6.1641e-09	0.000177008
TCONS_00006330	MAP3K11	-3.79738	0.339168	973.987	6.21713e-09	0.000178525
TCONS_00008264	RSRC2	-1.67024	-0.315264	514.48	6.3037e-09	0.000180992
TCONS_00027375	FAM135A	-1.49865	0.481621	237.493	6.31416e-09	0.000181286
TCONS_00021901	CSNK1E	0.179991	-0.593273	70.1674	6.34048e-09	0.000182029
TCONS_00005636	SDHD	-0.688148	-0.163532	521.922	6.42825e-09	0.000184542
TCONS_00005637	SDHD	0.688148	0.163532	521.922	6.42825e-09	0.000184542
TCONS_00017612	EPAS1	-0.965723	-0.51524	245.103	6.52042e-09	0.000187162
TCONS_00031872	ZNF618	-2.66715	0.551351	467.442	6.53225e-09	0.000187495
TCONS_00010542	ZNF710	-1.86485	0.238214	565.041	6.75793e-09	0.000193946
TCONS_00018311	PLCL1	-3.04954	0.521781	592.579	6.83243e-09	0.000196077
TCONS_00002428	PTGER3	-1.18969	0.205349	485.165	6.84887e-09	0.000196542
TCONS_00018616	SP140L	-2.97134	0.44947	620.594	6.85302e-09	0.000196654
TCONS_00013133	COASY	1.10733	-0.321819	316.82	6.9035e-09	0.000198096
TCONS_00030867	ERICH1	-0.146085	-0.307933	276.102	6.9043e-09	0.000198112
TCONS_00024590	RAPGEF2	-1.8657	-0.522613	459.147	6.97235e-09	0.000200058
TCONS_00009619	CRIP1	1.71133	0.409839	459.74	7.00654e-09	0.000201032
TCONS_00012935	TP53I13	-1.42316	-0.271992	496.706	7.05345e-09	0.000202371
TCONS_00027507	NUS1	0.068137	0.336385	244.495	7.08974e-09	0.000203405
TCONS_00011404	LOC23117	-1.56863	0.197606	566.523	7.29465e-09	0.000209276
TCONS_00027540	LAMA2	-0.357447	-0.818094	157.9	7.29519e-09	0.000209284
TCONS_00007835	CSRNP2	-1.81786	0.54019	259.416	7.47571e-09	0.000214441
TCONS_00018106	HNMT	0.908625	-0.270561	350.653	7.49361e-09	0.000214947
TCONS_00008508	USPL1	-1.19887	0.358399	291.41	7.52149e-09	0.000215739
TCONS_00013656	SMG6	0.555828	-0.343656	239.381	7.56185e-09	0.000216874
TCONS_00009499	C14orf159	-2.57913	0.345001	607.749	7.90889e-09	0.000226819
TCONS_00015089	ZNF516	-0.550311	-0.492076	181.592	8.30301e-09	0.000238089
TCONS_00182622_add	MBNL3	-0.246048	-0.541625	121.26	8.3696e-09	0.00023999
TCONS_00019851	PANK2	0.577789	-0.201411	417.924	8.47783e-09	0.000243085
TCONS_00028979	POM121	0.952806	-0.361822	254.423	8.55296e-09	0.00024523
TCONS_00032538	FBXW2	0.00823274	0.7944	62.0692	8.55506e-09	0.000245282
TCONS_00025294	EXOC3	1.14603	-0.723043	67.2345	8.59733e-09	0.000246468
TCONS_00008886	LPAR6	2.1482	-0.384803	454.984	8.69957e-09	0.000249391
TCONS_00007931	BAZ2A	-0.834776	0.321031	282.543	8.78814e-09	0.000251921
TCONS_00014987	SS18	0.25391	0.272724	318.039	8.81711e-09	0.000252742
TCONS_00030503	LEPROTL1	-1.22624	0.253142	415.923	8.84612e-09	0.000253565
TCONS_00030504	LEPROTL1	1.22624	-0.253142	415.923	8.84612e-09	0.000253565
TCONS_00020143	PTPN1	0.306751	0.237168	365.002	9.03682e-09	0.000259013
TCONS_00016678	AKAP8L	-1.97925	0.290799	516.576	9.28098e-09	0.000265993
TCONS_00015076	CD226	-2.15629	0.520158	348.26	9.29489e-09	0.000266382
TCONS_00010796	SECISBP2L	-1.71079	0.303226	441.481	9.45891e-09	0.000271055
TCONS_00009202	SCFD1	-2.06718	-0.242641	681.446	9.48782e-09	0.000271873
TCONS_00001820	ACTN2	-1.81358	0.761235	331.119	9.48821e-09	0.000271875
TCONS_00017224	VRK3	-0.426454	0.278451	300.476	9.58885e-09	0.000274749
TCONS_00000164	SPEN	-0.19389	-0.240945	351.962	9.70804e-09	0.000278145
TCONS_00022423	ZNF589	1.26075	-0.308295	351.419	9.75649e-09	0.000279523
TCONS_00016884	SERTAD3	2.14559	-0.397284	441.489	9.75693e-09	0.000279526
TCONS_00012190	ARHGAP17	-1.67315	0.338159	393.817	9.96333e-09	0.00028542
TCONS_00023288	LRRFIP2	-0.17872	0.372909	201.425	1.03747e-08	0.000297172
TCONS_00014426	ICAM2	2.14661	-0.561739	321.339	1.04816e-08	0.000300203
TCONS_00011057	HOMER2	-1.87367	-0.223964	653.212	1.053e-08	0.00030157
TCONS_00016040	TSEN34	-1.65384	-0.483733	409.835	1.07498e-08	0.000307843
TCONS_00002527	GBP4	-1.50274	-0.706688	430.773	1.08206e-08	0.000309849
TCONS_00007906	WIBG	0.187754	-0.327154	242.37	1.09084e-08	0.000312329
TCONS_00017937	LIMS1	-1.39753	-0.265184	493.519	1.14175e-08	0.000326884
TCONS_00008215	PXN	-2.41081	0.405776	498.86	1.18271e-08	0.000338551
TCONS_00014193	UBTF	-0.463665	-0.451959	187.81	1.20154e-08	0.000343918
TCONS_00026904	ZSCAN26	-0.230624	-0.419758	183.758	1.20544e-08	0.000345021
TCONS_00018950	PREPL	-1.55768	-0.580973	368.912	1.21272e-08	0.000347092
TCONS_00030489	PTK2B	-1.38695	0.235722	464.953	1.21641e-08	0.000348136
TCONS_00024993	SEC24D	-0.333589	-0.209671	402.308	1.24528e-08	0.000356386
TCONS_00024645	SLBP	-2.50547	0.515622	438.782	1.2548e-08	0.000359085
TCONS_00021218	ICOSLG	1.51166	-0.333955	364.214	1.26098e-08	0.000360841
TCONS_00026180	NAIP	0.0201758	-0.281683	290.95	1.27708e-08	0.000365424
TCONS_00031833	RAD23B	-1.84317	0.34512	420.024	1.29333e-08	0.000370049
TCONS_00031834	RAD23B	1.84317	-0.34512	420.024	1.29333e-08	0.000370049
TCONS_00025857	KIAA0141	0.00316781	0.238461	344.434	1.29976e-08	0.000371863
TCONS_00033208	NXT2	-4.2178	0.33632	1101.25	1.30649e-08	0.000373773
TCONS_00032773	NPDC1	1.10384	-0.481593	169.823	1.31722e-08	0.00037683
TCONS_00014859	MOCOS	-1.83503	0.255406	526.688	1.32487e-08	0.000379007
TCONS_00027537	RNF146	-1.49689	-0.473736	372.439	1.33018e-08	0.000380512
TCONS_00028085	XLOC_008759	-1.6357	-0.580642	389.893	1.37536e-08	0.000393421
TCONS_00004998	EXT2	-1.68608	-0.673533	455.394	1.37996e-08	0.00039471
TCONS_00008183	RASAL1	-1.62193	-0.338352	476.862	1.41203e-08	0.000403855
TCONS_00031885	TLR4	-0.832813	-0.158026	543.727	1.42807e-08	0.000408427
TCONS_00005059	NDUFS3	-2.15781	0.179591	727.868	1.44182e-08	0.000412347
TCONS_00009853	TRMT5	-0.751195	0.447068	158.102	1.44896e-08	0.000414373
TCONS_00001976	ACOT7	-0.291567	-0.212623	393.293	1.45383e-08	0.000415753
TCONS_00028340	ASCC3	-2.64522	-0.160397	954.941	1.45646e-08	0.00041649
TCONS_00011728	LPCAT2	-1.20116	-0.69499	314.447	1.4578e-08	0.000416859
TCONS_00029815	VOPP1	0.544622	-0.321041	254.631	1.47435e-08	0.000421576
TCONS_00005338	PACS1	0.528018	0.653631	128.563	1.47834e-08	0.000422671
TCONS_00016621	TNPO2	-1.052	0.605163	89.2293	1.48451e-08	0.000424422
TCONS_00012567	SERPINF1	0.161121	-0.459591	133.846	1.48841e-08	0.000425522
TCONS_00025062	DDX60	-3.33691	0.45627	716.033	1.50522e-08	0.000430313
TCONS_00019555	ANKRD44	0.20718	-0.260193	312.738	1.52331e-08	0.000435454
TCONS_00003931	TSPAN14	-0.66847	-0.284871	341.166	1.56835e-08	0.000448282
TCONS_00027460	CEP57L1	0.343132	-0.236526	346.061	1.58302e-08	0.000452459
TCONS_00021109	NRIP1	0.855322	-0.376462	224.227	1.58416e-08	0.000452769
TCONS_00002975	USF1	-1.38723	-0.138988	679.204	1.60008e-08	0.000457288
TCONS_00032907	IL3RA	-1.49509	0.483696	226.693	1.60084e-08	0.000457489
TCONS_00018794	PUM2	-0.517512	-0.30476	302.42	1.6042e-08	0.000458434
TCONS_00020244	C20orf96	-0.574132	0.479665	123.651	1.60761e-08	0.000459392
TCONS_00018872	MEMO1	-1.15513	-0.323917	384.902	1.61448e-08	0.000461339
TCONS_00170413_add	CDKN2B-AS1	-1.37465	-0.310626	441.493	1.6154e-08	0.000461585
TCONS_00133964_add	CBR4	-1.59736	-0.35155	459.987	1.62824e-08	0.000465238
TCONS_00008473	ZMYM2	-1.44421	0.413986	272.37	1.64579e-08	0.000470236
TCONS_00029046	GTF2I	-0.888913	-0.217451	452.381	1.72987e-08	0.00049419
TCONS_00012263	LOC595101	0.334796	-0.319457	246.332	1.77096e-08	0.000505874
TCONS_00022906	MBNL1	-1.26198	-0.178009	577.556	1.82646e-08	0.000521673
TCONS_00030090	TFEC	-1.5634	-0.277396	513.054	1.85101e-08	0.000528648
TCONS_00006634	AMICA1	-1.51188	0.450625	253.069	1.87574e-08	0.000535655
TCONS_00006636	AMICA1	1.51188	-0.450625	253.069	1.87574e-08	0.000535655
TCONS_00022230	HRH1	-1.22868	-0.531877	288.808	1.88095e-08	0.000537105
TCONS_00002461	GNG5	2.34387	-0.379366	501.689	1.90914e-08	0.000545117
TCONS_00128827_add	UVSSA	-0.0527385	-0.228971	354.567	1.96086e-08	0.000559845
TCONS_00008257	VPS33A	-0.584866	-0.16457	496.61	1.96242e-08	0.000560272
TCONS_00025298	EXOC3	-1.15356	0.700918	69.9019	2.0052e-08	0.000572423
TCONS_00027971	PBX2	-1.01777	-0.537514	239.933	2.08209e-08	0.000594354
TCONS_00017552	FOSL2	0.336165	-0.265024	305.49	2.11705e-08	0.000604248
TCONS_00030937	KCTD9	-1.64133	-0.381818	448.147	2.11978e-08	0.000605006
TCONS_00016972	PTGIR	-1.16559	-0.647623	276.306	2.13614e-08	0.000609655
TCONS_00029462	SLC4A2	-1.62646	-0.649937	417.461	2.13788e-08	0.000610131
TCONS_00015069	PIGN	-1.45834	0.254778	444.917	2.1411e-08	0.000611028
TCONS_00004395	CXCL12	-1.39367	0.693163	114.043	2.16448e-08	0.000617656
TCONS_00029181	SLC12A9	-3.1302	0.573491	594.801	2.17167e-08	0.000619685
TCONS_00008085	CDK17	-0.549352	0.267671	311.227	2.20876e-08	0.000630246
TCONS_00023060	POLR2H	0.506985	-0.339994	229.427	2.22344e-08	0.000634413
TCONS_00010738	PLCB2	-1.50684	-0.220222	563.514	2.24838e-08	0.000641509
[truncated: 13,755 more rows]

## Sheet: IFNB1 vs Flu
Transcript	Gene	Intercept	Beta	logLikelihood	pValue	FDR
TCONS_00024368	HERC5	-2.10352	-2.12724	1484.77	8.91031e-281	2.76433e-276
TCONS_00024369	HERC5	2.10352	2.12724	1484.77	8.91031e-281	2.76433e-276
TCONS_00006102	FNBP4	0.96223	-2.36944	670.827	1.51461e-280	4.69861e-276
TCONS_00017821	RMND5A	0.625248	-3.86228	748.322	1.82468e-253	5.66035e-249
TCONS_00024681	ACOX3	-0.533174	-2.11331	834.248	5.05181e-246	1.56702e-241
TCONS_00024388	BANK1	0.287993	-2.96394	658.022	4.43754e-239	1.37643e-234
TCONS_00003089	IVNS1ABP	0.658741	-1.7906	641.254	1.24832e-238	3.8719e-234
TCONS_00024676	ACOX3	-1.66593	-1.99941	1201.21	1.91612e-237	5.94305e-233
TCONS_00009660	HNRNPC	-1.23457	1.65116	675.408	2.23616e-235	6.93544e-231
TCONS_00009661	HNRNPC	-0.381815	-2.43598	771.352	5.39254e-235	1.67244e-230
TCONS_00006164	PATL1	0.347149	-1.61158	680.633	1.58998e-234	4.93102e-230
TCONS_00032374	ZCCHC6	-4.06522	2.5884	1194.18	1.74646e-234	5.41611e-230
TCONS_00028750	CREB5	-1.79407	-1.91982	1239.84	2.47307e-232	7.66923e-228
TCONS_00008610	FNDC3A	-1.27285	-1.76025	1037.63	4.22361e-229	1.30974e-224
TCONS_00005940	DENND5A	-1.23121	-1.50407	1037.43	4.97914e-227	1.54398e-222
TCONS_00010002	DICER1	-1.55385	-2.34425	1142.24	2.52902e-225	7.84199e-221
TCONS_00017822	RMND5A	-1.64752	-2.47643	1190.69	5.33983e-225	1.65572e-220
TCONS_00021767	CHEK2	-0.898893	-2.68217	928.911	3.66884e-224	1.13756e-219
TCONS_00011692	ADCY7	0.423534	-1.48598	671.103	1.3202e-223	4.09327e-219
TCONS_00004938	PRRG4	-1.45475	-2.55612	1115.51	1.92638e-221	5.97256e-217
TCONS_00002428	PTGER3	1.18657	-2.15072	544.92	3.5989e-221	1.11577e-216
TCONS_00011753	CPNE2	-1.0039	-2.87891	989.584	1.50102e-219	4.65347e-215
TCONS_00031757	NANS	-1.86153	-2.0438	1235.07	1.90243e-218	5.89772e-214
TCONS_00022616	PPP4R2	-0.80766	-2.6046	873.132	2.1097e-216	6.54008e-212
TCONS_00022618	PPP4R2	0.80766	2.6046	873.132	2.1097e-216	6.54008e-212
TCONS_00023911	CCNL1	0.36364	-1.35471	685.963	4.68649e-216	1.45272e-211
TCONS_00000684	HIAT1	-1.02233	-2.77183	971.737	4.98241e-216	1.5444e-211
TCONS_00009998	DICER1	-0.644884	-3.05184	889.962	1.9601e-214	6.07532e-210
TCONS_00112039_add	LINC00158	-0.490462	-3.13515	856.294	2.71481e-214	8.41427e-210
TCONS_00007585	SLC6A12	-1.42338	-2.36292	1068.43	3.65354e-214	1.13234e-209
TCONS_00000299	PHACTR4	-1.34461	-1.97549	1021.47	5.222e-214	1.6184e-209
TCONS_00014287	SPAG9	-1.41495	-2.11902	1048.46	3.65265e-213	1.13199e-208
TCONS_00024587	RAPGEF2	-0.945596	-2.38065	890.733	2.80467e-212	8.69166e-208
TCONS_00004966	HIPK3	-1.94393	-2.21946	1252.41	1.908e-207	5.9125e-203
TCONS_00000129	VPS13D	-0.336408	-2.97965	761.721	5.9512e-207	1.8441e-202
TCONS_00010869	MYO1E	-1.54069	-2.53908	1120.31	6.24373e-207	1.93468e-202
TCONS_00017608	PPM1B	-2.02585	-2.23233	1285.44	2.3904e-206	7.40665e-202
TCONS_00033060	KDM6A	0.854315	-2.2049	501.759	1.1572e-205	3.58536e-201
TCONS_00016834	IFNL4	0.272221	-3.51867	716.264	1.85217e-205	5.73838e-201
TCONS_00010920	DENND4A	-0.503343	-2.69009	761.177	3.53843e-204	1.09624e-199
TCONS_00032967	SAT1	-1.61337	-1.29552	1141.8	7.41187e-204	2.2962e-199
TCONS_00024391	BANK1	-1.4722	-2.55645	1089.28	2.03845e-203	6.3149e-199
TCONS_00007746	CPNE8	-1.73269	-2.24733	1157.48	6.24656e-203	1.93506e-198
TCONS_00120191_add	LOC401074	-0.824237	-2.16407	812.721	7.59228e-201	2.35186e-196
TCONS_00017685	AFTPH	-1.01753	-2.65052	924.602	1.6057e-200	4.97383e-196
TCONS_00018916	HNRPLL	0.995302	-1.90399	520.964	2.17995e-200	6.75238e-196
TCONS_00031070	VCPIP1	-2.15748	-1.92371	1311.26	7.33198e-200	2.27101e-195
TCONS_00031071	VCPIP1	2.15748	1.92371	1311.26	7.33198e-200	2.27101e-195
TCONS_00004187	KLF6	1.18535	2.26459	939.327	1.3811e-199	4.27753e-195
TCONS_00004189	KLF6	-1.18535	-2.26459	939.327	1.3811e-199	4.27753e-195
TCONS_00026635	HNRNPH1	-1.38132	-2.43303	1028.71	3.08051e-199	9.54035e-195
TCONS_00022747	PARP14	-0.420945	-1.99146	689.976	5.99474e-199	1.85651e-194
TCONS_00001823	ACTN2	-1.5829	-2.47709	1111.4	2.31498e-197	7.16902e-193
TCONS_00001748_add	AGO3	-0.226149	-2.40278	640.267	1.4051e-196	4.35117e-192
TCONS_00028753	CREB5	0.171335	-1.84376	568.499	2.80534e-195	8.687e-191
TCONS_00002155	SNHG12	1.71536	-2.45229	482.264	2.85151e-195	8.82971e-191
TCONS_00027666	WTAP	-0.12276	-0.931893	810.792	1.01795e-194	3.15199e-190
TCONS_00028386	REV3L	-1.72626	-2.20897	1133.17	2.32027e-194	7.18424e-190
TCONS_00028340	ASCC3	-0.89298	-1.79704	819.821	3.6161e-194	1.11962e-189
TCONS_00024985	CAMK2D	-0.568706	-2.36373	724.63	8.41689e-193	2.60595e-188
TCONS_00025370	SLC1A3	-1.47535	-2.36935	1044.02	4.46554e-192	1.38253e-187
TCONS_00002284	PABPC4	-1.01634	-1.49588	875.162	1.23573e-191	3.82571e-187
TCONS_00001054	UBAP2L	-1.31478	-1.11368	1035.92	3.22576e-191	9.9863e-187
TCONS_00023967	LAMP3	-1.59167	-2.39537	1091.77	6.44165e-191	1.99414e-186
TCONS_00023969	LAMP3	1.59167	2.39537	1091.77	6.44165e-191	1.99414e-186
TCONS_00030475	PPP2R2A	0.514966	1.85453	698.268	1.0745e-190	3.3261e-186
TCONS_00018385	CFLAR	-1.18005	-0.839404	1069.33	8.23685e-189	2.54963e-184
TCONS_00001723	MIA3	-0.343121	-1.41906	696.581	3.13371e-188	9.69977e-184
TCONS_00028948	CCT6P1	-2.97613	2.49366	731.801	5.97232e-188	1.84855e-183
TCONS_00009666	HNRNPC	-2.88455	1.35352	1077.18	1.29052e-187	3.99428e-183
TCONS_00024728	ARAP2	-1.35087	-2.45675	998.829	1.52765e-187	4.72807e-183
TCONS_00033689	MECP2	-0.094733	-3.17292	721.142	4.19768e-187	1.29914e-182
TCONS_00008809	N4BP2L1	-1.04254	-1.46326	874.385	8.25429e-187	2.55454e-182
TCONS_00029349	AHCYL2	-2.39132	2.60629	554.791	1.21486e-186	3.75961e-182
TCONS_00008264	RSRC2	-0.530042	-1.47595	724.067	7.29292e-186	2.25687e-181
TCONS_00029353	AHCYL2	-0.934185	-2.66114	874.739	9.79421e-186	3.03082e-181
TCONS_00002589	LRIF1	0.310209	-1.43098	586.485	3.12012e-184	9.65457e-180
TCONS_00000128	VPS13D	-0.380612	3.29773	610.926	5.61838e-183	1.73844e-178
TCONS_00002156	SNHG12	-1.69784	2.39183	454.82	3.04388e-182	9.41806e-178
TCONS_00026420	HARS	-2.28319	1.34576	858.762	1.05277e-181	3.25726e-177
TCONS_00027822	FAM65B	-0.402566	-2.73497	700.243	1.56553e-181	4.84359e-177
TCONS_00018386	CFLAR	-0.934737	-1.75094	800.301	8.78141e-181	2.71679e-176
TCONS_00003088	IVNS1ABP	-1.34273	1.1539	712.757	1.30172e-180	4.02714e-176
TCONS_00004459	SAR1A	-0.716583	1.60678	519.395	2.64958e-180	8.19675e-176
TCONS_00010011	DICER1	-0.370918	2.15208	481.112	3.18848e-180	9.86357e-176
TCONS_00012229	NPIPL1	-0.480901	-2.35404	669.791	4.6412e-180	1.43571e-175
TCONS_00011675	ADCY7	-0.419515	1.43146	566.963	5.45275e-180	1.6867e-175
TCONS_00018965	ASB3	-0.51762	-2.94827	796.773	6.92361e-180	2.14161e-175
TCONS_00007291	NEDD1	-1.48182	-1.55853	998.996	7.44046e-180	2.30141e-175
TCONS_00025369	SLC1A3	-0.983092	-2.42502	841.517	1.77656e-179	5.4949e-175
TCONS_00033208	NXT2	-2.20143	-1.62546	1280.05	7.28128e-179	2.25203e-174
TCONS_00018924	HNRPLL	-0.985904	1.84814	471.691	1.24337e-178	3.84549e-174
TCONS_00007217	TBK1	-1.5689	-1.72315	1019.56	1.99312e-178	6.16411e-174
TCONS_00019549	STK17B	-1.06089	-1.99713	832.491	3.81034e-178	1.17838e-173
TCONS_00019551	STK17B	1.06089	1.99713	832.491	3.81034e-178	1.17838e-173
TCONS_00031209	AZIN1	-1.98254	-1.49001	1193.44	2.02326e-177	6.25674e-173
TCONS_00019261	RNF149	-0.986827	-0.86745	969.61	2.05426e-177	6.3524e-173
TCONS_00004123	SEC23IP	-0.617122	-2.48796	720.567	4.09353e-177	1.2658e-172
TCONS_00029843	RFC2	-0.307398	-2.70574	658.356	8.79395e-177	2.71918e-172
TCONS_00032361	ZCCHC6	-1.15346	-1.68402	863.696	4.20697e-176	1.30079e-171
TCONS_00031137	NBN	-3.04776	2.27731	774.791	1.75826e-175	5.43635e-171
TCONS_00020130	DDX27	0.489683	-2.76823	471.033	3.15147e-175	9.74373e-171
TCONS_00007959	TMEM194A	-2.16033	3.16246	463.697	4.99224e-175	1.54345e-170
TCONS_00018379	CFLAR	-1.95772	1.81554	585.395	1.2804e-174	3.95848e-170
TCONS_00030056	ATXN7L1	-2.97068	2.82406	666.409	5.11166e-174	1.58022e-169
TCONS_00129181_add	TRMT44	-1.34585	-2.06282	927.9	7.22088e-174	2.23219e-169
TCONS_00026076	RANBP3L	-1.89081	-2.11911	1148.76	1.3451e-173	4.15798e-169
TCONS_00033057	KDM6A	-2.25123	1.75042	673.026	1.39211e-173	4.30314e-169
TCONS_00024575	RAPGEF2	-3.3707	2.50411	839.922	1.67124e-173	5.1658e-169
TCONS_00014934	LPIN2	-0.325276	-2.00411	600.157	2.55432e-173	7.89516e-169
TCONS_00001385	BLZF1	-1.26353	-1.23054	943.79	7.44809e-173	2.30206e-168
TCONS_00030353	ESYT2	-0.876563	-2.39315	787.178	9.26678e-173	2.86408e-168
TCONS_00033165	XLOC_010457	-0.849349	-2.68582	837.211	1.53746e-172	4.75167e-168
TCONS_00031257	ENPP2	-1.61125	-2.02564	1023.97	6.62871e-172	2.0486e-167
TCONS_00012834	XLOC_004138	-1.74514	-2.2693	1102.07	2.06436e-171	6.3797e-167
TCONS_00030054	ATXN7L1	-0.803167	-1.43323	763.281	2.18182e-171	6.74248e-167
TCONS_00019282	LOC541471	-1.95233	-1.97517	1157.68	6.96953e-171	2.15372e-166
TCONS_00029382	UBN2	-0.352174	-1.60198	624.048	1.56736e-170	4.84329e-166
TCONS_00013960	SSH2	0.508059	-1.87394	457.621	2.01877e-169	6.2378e-165
TCONS_00017600	GALM	-1.69327	-1.18499	1096.92	2.33848e-169	7.22543e-165
TCONS_00025422	PARP8	-1.47229	-2.36665	1003.24	2.61231e-169	8.07125e-165
TCONS_00025446	GPBP1	-0.58637	1.41562	531.589	2.12047e-168	6.55118e-164
TCONS_00025444	GPBP1	-0.767527	-1.44626	742.841	2.51006e-168	7.75458e-164
TCONS_00026073	RANBP3L	0.0374388	-3.04289	635.123	2.70557e-168	8.35833e-164
TCONS_00019279	LOC541471	0.604247	-3.02996	477.366	1.07783e-167	3.32965e-163
TCONS_00004983	CD44	-0.594754	-1.99545	657.841	1.42446e-167	4.40029e-163
TCONS_00004673	XLOC_001457	-0.936047	-2.43173	805.498	3.18031e-167	9.82397e-163
TCONS_00030489	PTK2B	0.499838	-1.62524	486.916	4.46823e-167	1.38019e-162
TCONS_00010919	DENND4A	0.493197	2.50434	664.725	4.26636e-166	1.31779e-161
TCONS_00005723	EI24	-0.652101	-2.77584	790.272	8.7825e-166	2.71265e-161
TCONS_00009387	PCNX	-2.18025	-1.99883	1243.25	2.57726e-165	7.96014e-161
TCONS_00007240	MDM2	-1.20006	2.3043	382.699	1.20672e-163	3.72696e-159
TCONS_00032529	TNFSF8	-0.320873	-1.81753	578.322	4.44428e-163	1.37253e-158
TCONS_00033056	KDM6A	-3.46032	2.15018	930.878	6.1346e-163	1.89449e-158
TCONS_00022404	CCR5	-0.457284	1.37964	528.422	1.19466e-162	3.68911e-158
TCONS_00022406	CCR5	0.457284	-1.37964	528.422	1.19466e-162	3.68911e-158
TCONS_00011752	CPNE2	-1.79532	-2.18664	1095.51	1.30722e-162	4.03644e-158
TCONS_00012836	XLOC_004139	0.294165	-3.16745	601.958	3.22561e-162	9.95971e-158
TCONS_00003982	XLOC_001229	-0.395539	-2.8025	703.944	8.50712e-162	2.62666e-157
TCONS_00009407	RBM25	-1.38704	-1.4894	919.541	2.51951e-161	7.779e-157
TCONS_00004458	SAR1A	-1.94698	-1.7031	1124.98	6.03465e-161	1.86314e-156
TCONS_00000287	STX12	-1.6335	-1.97624	1002.49	5.58826e-160	1.72526e-155
TCONS_00006106	FNBP4	-2.26392	1.51167	722.532	1.07996e-159	3.33405e-155
TCONS_00027816	FAM65B	-3.19936	2.25139	802.057	2.87279e-159	8.8686e-155
TCONS_00024671	AFAP1	-1.05192	-2.42632	837.316	5.36272e-159	1.65547e-154
TCONS_00031251	ENPP2	-1.75748	-2.13598	1066.22	5.63835e-159	1.7405e-154
TCONS_00140443_add	NRG2	-0.614673	-2.71216	755.138	1.41211e-158	4.35889e-154
TCONS_00015888	PPP1R15A	-1.0029	-2.44688	822.752	2.45019e-158	7.56301e-154
TCONS_00015891	PPP1R15A	1.0029	2.44688	822.752	2.45019e-158	7.56301e-154
TCONS_00023661	CGGBP1	-1.07412	-1.9238	786.205	3.46714e-158	1.07013e-153
TCONS_00023077	EIF4A2	-2.83244	2.17493	690.236	3.7632e-158	1.16147e-153
TCONS_00032972	ZFX	-0.683655	-1.93321	659.679	3.77311e-158	1.1645e-153
TCONS_00032973	ZFX	-0.320033	-2.61761	621.331	1.69916e-157	5.24377e-153
TCONS_00005566	CCDC83	-0.514688	3.30791	598.27	2.04632e-157	6.31494e-153
TCONS_00011653	ZNF267	-1.44857	-1.37503	941.157	9.22357e-157	2.8463e-152
TCONS_00017819	RMND5A	-2.43811	2.10686	582.82	3.4303e-156	1.05852e-151
TCONS_00016823	HNRNPL	-1.57945	-1.27832	1000.18	6.25841e-156	1.93116e-151
TCONS_00005873	IGF2	-0.387117	-2.83463	719.787	8.8973e-156	2.74535e-151
TCONS_00004199	XLOC_001310	0.0560147	-2.92231	590.92	2.50304e-155	7.72314e-151
TCONS_00010887	HERC1	-1.27748	-2.07909	861.898	3.3961e-155	1.04783e-150
TCONS_00025978	HRH2	-0.999391	-1.39189	782.036	3.50456e-155	1.08126e-150
TCONS_00000099	KIF1B	0.251933	1.34278	599.237	4.29415e-155	1.32483e-150
TCONS_00000102	KIF1B	-0.251933	-1.34278	599.237	4.29415e-155	1.32483e-150
TCONS_00006149	PATL1	-0.726874	1.22823	547.908	6.81494e-155	2.10241e-150
TCONS_00024365	HERC6	-2.83423	1.80363	785.664	1.10631e-154	3.41285e-150
TCONS_00007242	MDM2	-1.19466	-1.69434	820.094	1.17652e-154	3.62933e-150
TCONS_00023913	CCNL1	-2.59372	1.12674	994.336	1.13152e-153	3.49038e-149
TCONS_00032373	ZCCHC6	-1.56637	-1.50567	961.501	4.56218e-153	1.40725e-148
TCONS_00002749	TDRKH	1.02017	-1.48809	478.139	5.58689e-153	1.72328e-148
TCONS_00030541	ADAM9	-0.010848	1.40429	537.027	5.94579e-153	1.83392e-148
TCONS_00030542	ADAM9	0.010848	-1.40429	537.027	5.94579e-153	1.83392e-148
TCONS_00023205	XPC	-0.945511	-2.16364	744.715	9.70857e-153	2.99432e-148
TCONS_00028500	LATS1	-0.658151	-1.67131	645.236	1.62192e-152	5.00216e-148
TCONS_00024885	HNRPDL	-0.65262	-1.20757	708.394	1.81793e-152	5.6065e-148
TCONS_00008584	LRCH1	-0.373702	-2.46979	600.785	2.78904e-152	8.60111e-148
TCONS_00002590	LRIF1	-0.30716	1.37656	506.965	7.18818e-152	2.21669e-147
TCONS_00004354	EPC1	-1.13914	-1.86884	790.178	3.67271e-151	1.13255e-146
TCONS_00025363	SLC1A3	-3.28463	2.62492	781.376	7.49854e-151	2.31225e-146
TCONS_00031793	NR4A3	-1.02908	1.24562	548.655	8.34552e-151	2.57334e-146
TCONS_00024359	HERC6	0.711835	-1.07252	592.037	1.90344e-150	5.86907e-146
TCONS_00003623	PDSS1	-1.09875	-2.35859	831.08	2.77773e-150	8.56457e-146
TCONS_00029673	NT5C3A	-1.60316	-0.718325	1151.47	3.7107e-150	1.14408e-145
TCONS_00017553	FOSL2	-1.50366	-1.59629	923.73	5.26607e-150	1.62358e-145
TCONS_00013686	ZZEF1	-0.661999	-2.41945	682.966	9.41032e-150	2.9012e-145
TCONS_00030474	PPP2R2A	-1.33801	-1.11802	924.84	1.58838e-149	4.89682e-145
TCONS_00000130	VPS13D	-1.5793	-2.23158	994.248	1.61613e-149	4.9822e-145
TCONS_00019507	SESTD1	-0.633142	-2.48675	688.946	1.95486e-149	6.02626e-145
TCONS_00001718	MIA3	-2.66931	0.949766	1116.88	2.07529e-149	6.39729e-145
TCONS_00024690	FBXL5	0.92307	2.2044	735.382	2.67571e-149	8.24788e-145
TCONS_00024692	FBXL5	-0.92307	-2.2044	735.382	2.67571e-149	8.24788e-145
TCONS_00020969	SON	-1.12541	0.795305	775.564	3.3878e-149	1.04422e-144
TCONS_00005590	PIWIL4	-1.09693	-2.40428	841.797	3.62992e-149	1.11882e-144
TCONS_00003090	IVNS1ABP	-2.64943	1.03731	1053.3	4.2558e-149	1.31168e-144
TCONS_00007757	SCAF11	2.04478	1.2021	1173.86	5.04812e-149	1.55583e-144
TCONS_00007759	SCAF11	-2.04478	-1.2021	1173.86	5.04812e-149	1.55583e-144
TCONS_00022778	ATP2C1	-2.78965	1.41364	903.985	6.1161e-148	1.88486e-143
TCONS_00021130	XLOC_006587	-0.826649	-2.50702	767.468	2.26714e-147	6.98663e-143
TCONS_00017018	PLA2G4C	-0.883733	-2.15287	710.676	5.43663e-147	1.67535e-142
TCONS_00001703	RPS6KC1	-1.73136	-2.15045	1037.95	5.74917e-147	1.77161e-142
TCONS_00026409	HARS	2.24425	-1.35506	743.84	1.14559e-146	3.53002e-142
TCONS_00030480	PPP2R2A	-1.65442	-2.18205	1011.09	3.16197e-146	9.74298e-142
TCONS_00018093	CCNT2	-0.446426	-1.42877	596.82	1.80423e-145	5.55902e-141
TCONS_00032991	ZFX	-2.9787	2.7858	671.001	3.04765e-145	9.38981e-141
TCONS_00030486	PTK2B	-0.494758	1.56957	433.735	4.0123e-145	1.23615e-140
TCONS_00031534	CNTLN	-0.233205	-0.867986	709.03	1.20923e-144	3.72539e-140
TCONS_00017820	RMND5A	-1.99648	2.16941	438.143	1.36438e-144	4.20326e-140
TCONS_00023932	RPL22L1	0.0447173	-1.66146	466.973	1.4505e-144	4.46842e-140
TCONS_00011746	NLRC5	-0.564557	-1.68799	596.109	1.45412e-144	4.47941e-140
TCONS_00018795	PUM2	-0.0419757	-1.67151	479.507	2.8761e-144	8.85952e-140
TCONS_00001700	RPS6KC1	-1.47661	-1.93401	902.079	3.17258e-144	9.77251e-140
TCONS_00018894	CEBPZ	-1.37885	-1.98441	868.03	4.98307e-144	1.53488e-139
TCONS_00022665	ALCAM	-1.39912	-1.10327	931.607	1.24265e-143	3.82736e-139
TCONS_00022666	ALCAM	1.39912	1.10327	931.607	1.24265e-143	3.82736e-139
TCONS_00024044	IQCG	1.42618	-2.31068	339.612	5.65507e-143	1.74165e-138
TCONS_00000234	SRRM1	-0.390577	-1.23311	612.922	1.26005e-142	3.88058e-138
TCONS_00027217	UHRF1BP1	-0.191502	-2.59131	563.593	2.11278e-142	6.50651e-138
TCONS_00018983	CCDC88A	-1.82368	-1.15565	1073.84	3.0336e-142	9.34198e-138
TCONS_00006725	WNK1	-1.56765	-1.01973	1006.43	7.60772e-142	2.34264e-137
TCONS_00019280	LOC541471	-1.69201	-2.05573	996.919	1.7544e-141	5.40215e-137
TCONS_00018250	ITGAV	-2.01155	-1.60108	1100.11	6.50676e-141	2.0035e-136
TCONS_00004538	LIPA	-0.562292	-0.718408	825.914	1.189e-140	3.66093e-136
TCONS_00029703	XLOC_009295	-0.874314	-0.917033	811.857	1.69613e-140	5.22221e-136
TCONS_00019170	ST3GAL5	0.65265	1.01266	723.696	1.83126e-140	5.63808e-136
TCONS_00019176	ST3GAL5	-0.65265	-1.01266	723.696	1.83126e-140	5.63808e-136
TCONS_00007173	MARS	-1.90477	1.60869	538.974	2.59376e-140	7.98515e-136
TCONS_00031250	ENPP2	-1.18228	-0.959784	887.187	3.24696e-140	9.99575e-136
TCONS_00027238	SRSF3	-0.323602	-1.35345	565.363	1.08004e-139	3.32479e-135
TCONS_00007241	MDM2	0.166521	-1.6852	431.674	1.22886e-139	3.78279e-135
TCONS_00003332	OPN3	-1.67288	2.35408	351.428	1.98147e-139	6.09936e-135
TCONS_00007177	MARS	1.8962	-1.63957	524.6	2.46031e-139	7.57308e-135
TCONS_00024677	ACOX3	-2.26425	1.83094	560.666	2.49091e-139	7.66703e-135
TCONS_00007383	ATP2A2	2.3208	-0.695	1145.28	4.04449e-139	1.24485e-134
TCONS_00007384	ATP2A2	-2.3208	0.695	1145.28	4.04449e-139	1.24485e-134
TCONS_00032546	PHF19	-1.63869	-2.12351	983.372	8.64239e-139	2.65987e-134
TCONS_00003335	OPN3	0.125372	-2.68893	493.052	1.02749e-138	3.16221e-134
TCONS_00014011	CCL5	-1.11725	-0.823275	910.765	1.18697e-138	3.6529e-134
TCONS_00024729	ARAP2	-2.68698	1.76498	705.671	2.97737e-138	9.16255e-134
TCONS_00026703	MGAT1	-1.95994	-1.19107	1108.42	6.12525e-138	1.88492e-133
TCONS_00010863	MYO1E	1.49525	2.18306	936.498	1.16548e-137	3.58642e-133
TCONS_00032334	RFK	1.18092	2.2628	829.582	1.58444e-137	4.87548e-133
TCONS_00032336	RFK	-1.18092	-2.2628	829.582	1.58444e-137	4.87548e-133
TCONS_00031237	EXT1	-0.607093	-1.00083	707.232	2.14998e-137	6.61526e-133
TCONS_00006608	TMPRSS13	-1.32778	-1.68925	820.821	2.93892e-137	9.04247e-133
TCONS_00030883	SGK223	-1.12094	-2.28124	810.723	3.47662e-137	1.06962e-132
TCONS_00018235	MIR548N	-0.730642	0.830001	669.68	3.4828e-137	1.07148e-132
TCONS_00000579	RABGGTB	-0.233775	-1.10703	599.469	3.67985e-137	1.13207e-132
TCONS_00029552	ADAP1	0.852482	-2.07982	329.164	5.48353e-137	1.6869e-132
TCONS_00018242	SSFA2	-1.30996	-1.48726	822.83	5.75667e-137	1.77087e-132
TCONS_00019450	STK39	-0.764541	-2.48927	743.314	9.21879e-137	2.83579e-132
TCONS_00005823	IRF7	-2.81616	1.86226	715.95	9.58881e-137	2.94952e-132
TCONS_00024665	AFAP1	-1.31741	-2.13796	852.938	1.4792e-136	4.54986e-132
TCONS_00033575	XLOC_010626	-0.0348007	-2.83766	623.1	1.66041e-136	5.10709e-132
TCONS_00001600	SRGAP2	-1.41254	-0.613933	1099.36	2.47095e-136	7.5999e-132
TCONS_00031866	RGS3	0.344884	-2.95861	534.929	2.84901e-136	8.76242e-132
TCONS_00002586	KCNA3	0.709217	-2.54485	339.907	8.57325e-136	2.63662e-131
TCONS_00030238	EZH2	-0.848341	-1.6697	654.407	9.50602e-136	2.92339e-131
TCONS_00018453	NRP2	-1.05192	-2.0435	734.507	2.99889e-135	9.22218e-131
TCONS_00002346	MKNK1	0.335402	-0.74682	697.633	4.08678e-135	1.25673e-130
TCONS_00003227	EPRS	-0.53687	-2.5261	669.361	5.35376e-135	1.64628e-130
TCONS_00030051	ATXN7L1	-1.03046	-1.46469	724.23	5.53067e-135	1.70062e-130
TCONS_00003974	IFIT1	-1.17125	0.615049	872.003	6.22915e-135	1.91534e-130
TCONS_00003975	IFIT1	1.17125	-0.615049	872.003	6.22915e-135	1.91534e-130
TCONS_00021362	ASPHD2	-1.13989	-2.29769	823.171	8.25559e-135	2.53826e-130
TCONS_00024045	IQCG	-1.41096	2.25264	321.838	1.26066e-134	3.87591e-130
TCONS_00003659	MAP3K8	1.51963	-1.37755	519.253	2.71935e-134	8.36038e-130
TCONS_00024158	CPEB2	-0.462743	-0.793622	748.753	2.76814e-134	8.51009e-130
TCONS_00009659	HNRNPC	-0.779269	-0.858983	789.088	3.89373e-134	1.19701e-129
TCONS_00016679	AKAP8L	-0.0844172	-1.59223	465.225	7.4231e-134	2.28193e-129
TCONS_00007356	KIAA1033	-2.0115	-1.16204	1121.71	7.53315e-134	2.31569e-129
TCONS_00007358	KIAA1033	2.0115	1.16204	1121.71	7.53315e-134	2.31569e-129
TCONS_00029383	UBN2	0.346936	1.52455	525.884	9.82456e-134	3.01977e-129
TCONS_00020052	SRSF6	-0.383381	-1.47183	540.454	1.36736e-133	4.20259e-129
TCONS_00003311	IRF2BP2	-1.68067	-1.90793	958.185	1.39104e-133	4.27523e-129
TCONS_00032530	TNFSF8	0.315807	1.73068	499.277	1.96825e-133	6.04902e-129
TCONS_00112036_add	LINC00158	-1.60899	1.64159	448.859	2.58e-133	7.92887e-129
TCONS_00002748	TDRKH	-2.08215	1.76901	513.746	2.89463e-133	8.8955e-129
TCONS_00030554	AGPAT6	-1.27843	-1.5905	793.969	4.72688e-133	1.45257e-128
TCONS_00031258	ENPP2	-1.79956	1.33144	590.553	1.36225e-132	4.18593e-128
TCONS_00021771	CHEK2	-2.55666	2.74053	526.601	1.50917e-132	4.63721e-128
TCONS_00002582	KCNA3	-1.27566	2.51535	301.639	1.61646e-132	4.96673e-128
TCONS_00009996	SERPINA1	-0.472738	-1.45687	559.832	1.77815e-132	5.46337e-128
TCONS_00029521	GALNT11	-0.645097	1.63444	377.058	1.84471e-132	5.66769e-128
TCONS_00011034	XLOC_003550	0.302947	-2.97176	576.717	2.32379e-132	7.13938e-128
TCONS_00010670	MTMR10	-0.517176	-1.50232	564.373	2.79286e-132	8.58023e-128
TCONS_00005623	DDX10	0.314779	-2.37204	377.817	3.08315e-132	9.47173e-128
TCONS_00005725	EI24	-0.300682	1.96441	369.182	3.558e-132	1.09302e-127
TCONS_00024721	ARAP2	-1.01575	-0.79606	870.846	8.62346e-132	2.64904e-127
TCONS_00023910	CCNL1	-2.99501	1.58557	860.613	1.49246e-131	4.58454e-127
TCONS_00025001	TNIP3	-0.981137	-1.99152	695.767	1.78261e-131	5.47565e-127
TCONS_00026498	TNIP1	1.25965	-1.59611	405.82	2.22652e-131	6.83899e-127
TCONS_00008620	SETDB2	-0.642717	-1.87487	577.923	2.23907e-131	6.87732e-127
TCONS_00029348	AHCYL2	-3.25838	1.80648	882.988	2.41234e-131	7.40925e-127
TCONS_00022748	PARP14	0.0906139	0.796266	682.837	2.53545e-131	7.78713e-127
TCONS_00001485	DHX9	-1.22902	-1.27718	802.448	2.63388e-131	8.08918e-127
TCONS_00018178	GCA	-0.902458	-1.02018	757.625	2.67709e-131	8.22161e-127
TCONS_00027375	FAM135A	0.195694	-1.28333	475.812	4.1866e-131	1.28571e-126
TCONS_00030117	TFEC	-0.139493	-1.08855	570.607	6.1264e-131	1.88129e-126
TCONS_00030639	XLOC_009588	-2.12745	-1.59328	1121.42	7.03205e-131	2.15933e-126
TCONS_00031133	NBN	-1.92668	-1.72057	1039.38	7.58024e-131	2.32759e-126
TCONS_00020895	USP25	-2.00301	-1.13836	1112.68	1.21117e-130	3.71889e-126
TCONS_00026340	AFF4	-1.42069	-1.55214	840.284	1.45911e-130	4.48004e-126
TCONS_00023985	TRA2B	-1.03657	-1.02959	790.554	3.02022e-130	9.27299e-126
TCONS_00023986	TRA2B	1.03657	1.02959	790.554	3.02022e-130	9.27299e-126
TCONS_00029352	AHCYL2	-1.84343	-1.74298	1004.31	3.68423e-130	1.13109e-125
TCONS_00000649	GBP1P1	-2.22827	-1.71041	1164.04	6.52127e-130	2.00203e-125
TCONS_00018616	SP140L	-0.883276	-1.59557	651.795	9.49734e-130	2.91559e-125
TCONS_00027111	SKIV2L	0.25515	-1.68754	390.255	1.02092e-129	3.13403e-125
TCONS_00023996	BCL6	-1.75801	-1.95479	988.891	1.34353e-129	4.1241e-125
TCONS_00025704	TNFAIP8	-2.22163	0.819629	983.757	1.41238e-129	4.33531e-125
TCONS_00030880	SGK223	-1.70871	1.21537	608.598	1.72675e-129	5.30009e-125
TCONS_00031131	NBN	-1.47635	1.15055	587.105	2.30411e-129	7.07201e-125
TCONS_00031200	UBR5	-0.628278	-1.36581	601.087	5.41611e-129	1.66231e-124
TCONS_00033692	MECP2	-1.10204	-1.93874	727.856	1.05662e-128	3.24277e-124
TCONS_00030349	ESYT2	-1.63766	-1.93661	934.381	2.2925e-128	7.03547e-124
TCONS_00055002_add	LDHAL6B	-0.0738493	-2.58247	525.863	4.42143e-128	1.35685e-123
TCONS_00013687	ZZEF1	0.647793	2.27099	623.612	5.4257e-128	1.66498e-123
TCONS_00002425	PTGER3	-2.63655	2.00022	600.812	9.78271e-128	3.00192e-123
TCONS_00057279_add	PATL2	-1.58509	-1.1043	947.443	2.73292e-127	8.38542e-123
TCONS_00008807	N4BP2L1	0.230392	0.784468	692.777	3.07902e-127	9.44704e-123
TCONS_00005874	IGF2	-1.43669	-2.13187	892.141	5.08681e-127	1.56068e-122
TCONS_00030658	RIPK2	-3.14006	0.974589	1217.52	5.86295e-127	1.79875e-122
TCONS_00008692	UBAC2	-0.557809	-1.73928	541.243	1.1132e-126	3.4152e-122
TCONS_00029551	ADAP1	-0.842308	2.0201	303.869	2.78245e-126	8.536e-122
TCONS_00021128	XLOC_006587	-0.962893	-2.32105	765.126	3.65447e-126	1.12108e-121
TCONS_00001699	RPS6KC1	-1.99114	2.1225	399.811	5.04804e-126	1.54854e-121
TCONS_00002159	SRSF4	-1.63501	-1.05335	972.642	8.26248e-126	2.53452e-121
TCONS_00028291	FAM46A	-1.54692	-1.98781	901.534	1.44301e-125	4.42629e-121
TCONS_00022476	RBM5	-2.90096	0.896798	1168.71	1.52629e-125	4.68159e-121
TCONS_00006100	FNBP4	-1.64365	1.27839	553.599	3.06144e-125	9.39004e-121
TCONS_00004223	IL15RA	-1.13659	-0.999525	812.267	7.8187e-125	2.39807e-120
TCONS_00020517	XLOC_006415	-0.181193	2.20339	373.124	8.79451e-125	2.69728e-120
TCONS_00030967	WHSC1L1	0.216855	-0.823199	623.735	1.55696e-124	4.77503e-120
TCONS_00030044	SRPK2	-2.1373	0.860271	908.984	5.81279e-124	1.78261e-119
TCONS_00006330	MAP3K11	-2.11931	-1.27291	1118.08	7.91859e-124	2.42832e-119
TCONS_00002285	PABPC4	-2.46671	1.58689	653.437	1.09449e-123	3.35626e-119
TCONS_00009573	TNFAIP2	0.353419	0.976741	619.181	1.11789e-123	3.4279e-119
TCONS_00009576	TNFAIP2	-0.353419	-0.976741	619.181	1.11789e-123	3.4279e-119
TCONS_00021438	APOL6	-1.63983	1.0751	639.199	2.24161e-123	6.87323e-119
TCONS_00021439	APOL6	1.63983	-1.0751	639.199	2.24161e-123	6.87323e-119
TCONS_00005836	IRF7	0.253787	-1.0963	500.576	6.76446e-123	2.07398e-118
TCONS_00021212	U2AF1	-1.70716	-1.17192	965.685	8.43025e-123	2.58463e-118
TCONS_00006602	FXYD6-FXYD2	-1.62366	-1.49595	896.858	1.17526e-122	3.60313e-118
TCONS_00023204	XPC	0.924565	2.00371	660.451	1.45228e-122	4.45226e-118
TCONS_00032964	SAT1	-2.04852	0.679471	1010.94	1.98046e-122	6.0713e-118
TCONS_00020972	SON	-1.25986	-0.507453	1078.78	1.99224e-122	6.10722e-118
TCONS_00000750	MOV10	-0.993892	-0.887045	797.879	2.24781e-122	6.89044e-118
TCONS_00023089	EIF4A2	-0.716531	-1.29148	615.676	2.3225e-122	7.11916e-118
TCONS_00023423	UBA7	-2.22449	0.76952	996.144	9.62347e-122	2.94979e-117
TCONS_00014551	SRSF2	-1.75123	-0.905918	1043.22	1.01832e-121	3.12127e-117
TCONS_00001722	MIA3	0.0836748	0.772201	662.448	1.52966e-121	4.68841e-117
TCONS_00025038	OTUD4	-1.46375	-1.22023	862.904	1.58613e-121	4.86134e-117
TCONS_00011867	SF3B3	0.954629	1.52818	653.89	2.07619e-121	6.36311e-117
TCONS_00011868	SF3B3	-0.954629	-1.52818	653.89	2.07619e-121	6.36311e-117
TCONS_00033167	XLOC_010457	-1.01598	-2.1792	734.695	2.71339e-121	8.31517e-117
TCONS_00003658	MAP3K8	-2.23054	1.46398	618.501	3.33557e-121	1.02215e-116
TCONS_00032308	AK057188	-1.01456	-0.835785	818.532	6.24618e-121	1.91402e-116
TCONS_00008268	RSRC2	-1.58295	-2.0031	914.545	8.82808e-121	2.7051e-116
TCONS_00005986	HPS5	-1.24515	-1.72633	746.816	1.49565e-120	4.58282e-116
TCONS_00014286	SPAG9	-0.36927	0.931912	553.303	1.52163e-120	4.66227e-116
TCONS_00033659	CD99L2	-1.72317	-1.69024	929.362	1.52178e-120	4.66257e-116
TCONS_00003228	EPRS	0.52506	2.39782	629.092	1.93354e-120	5.92399e-116
TCONS_00031569	ACO1	-2.72829	1.6426	712.233	2.33263e-120	7.14648e-116
TCONS_00006736	WNT5B	-1.7027	1.14723	608.769	2.6942e-120	8.25395e-116
TCONS_00018094	CCNT2	-2.21974	2.00333	460.675	3.59614e-120	1.10168e-115
TCONS_00031865	RGS3	-0.331242	2.7791	492.712	5.26326e-120	1.61235e-115
TCONS_00000233	SRRM1	-3.08987	1.96415	754.711	6.97152e-120	2.13559e-115
TCONS_00018003	CBWD2	-1.72377	1.30168	544.587	7.49776e-120	2.29671e-115
TCONS_00000164	SPEN	-1.46899	1.03255	609.674	2.2545e-119	6.90531e-115
TCONS_00018454	NRP2	-1.79376	-0.869928	1062.59	3.59463e-119	1.10096e-114
TCONS_00024595	KLHL2	0.0955623	1.34483	459.716	5.99491e-119	1.836e-114
TCONS_00031135	NBN	-1.42017	-0.888235	920.299	7.19873e-119	2.20461e-114
TCONS_00007748	ABCD2	0.976591	-2.22017	270.778	7.87437e-119	2.41145e-114
TCONS_00026627	HNRNPH1	-1.51348	0.71684	812.59	1.90002e-118	5.81842e-114
TCONS_00012302	MYLK3	-0.899531	-2.27847	731.531	2.16979e-118	6.64432e-114
TCONS_00011354	NOMO1	-1.77168	2.36108	320.361	2.49728e-118	7.64691e-114
TCONS_00024134	XLOC_007542	-1.23625	-2.10775	800.619	2.49821e-118	7.64953e-114
TCONS_00010196	SPRED1	-1.4979	-0.773902	988.32	3.14199e-118	9.62047e-114
TCONS_00030354	ESYT2	-1.45948	-1.19325	855.121	3.60164e-118	1.10275e-113
TCONS_00016842	IFNL4	-0.321218	-2.39903	552.345	5.2332e-118	1.6022e-113
TCONS_00002662	POLR3C	-0.960165	-1.56162	642.782	8.73199e-118	2.6733e-113
TCONS_00000569	SRSF11	-1.84633	-1.26877	988.135	1.68471e-117	5.15724e-113
TCONS_00007964	TMEM194A	-3.67393	1.8031	1024.44	1.80586e-117	5.52792e-113
TCONS_00028057	PSMB8	2.50463	-2.49592	509.7	1.96545e-117	6.01624e-113
TCONS_00000648	GBP1P1	-1.5255	-1.41827	848.434	2.52822e-117	7.73863e-113
TCONS_00018002	CBWD2	1.71349	-1.33178	521.808	3.03188e-117	9.27999e-113
TCONS_00029526	INSIG1	-0.408115	1.08478	478.687	3.52448e-117	1.07874e-112
TCONS_00019833	ATRN	-3.15535	1.89556	789.544	6.55487e-117	2.00618e-112
TCONS_00015071	BCL2	0.401801	-2.24399	319.716	6.88842e-117	2.1082e-112
TCONS_00030867	ERICH1	0.697459	-1.15476	453.031	7.0614e-117	2.16107e-112
TCONS_00021180	RCAN1	-0.517948	-0.934517	643.619	7.25412e-117	2.21998e-112
TCONS_00027216	UHRF1BP1	0.184028	2.37719	494.485	9.25066e-117	2.83089e-112
TCONS_00001447	CEP350	-0.491966	-0.981305	621.209	1.0456e-116	3.19964e-112
TCONS_00076313_add	TEX14	-0.160322	-2.24186	448.012	1.05412e-116	3.22562e-112
TCONS_00004120	SEC23IP	-3.20824	1.97845	794.272	1.0582e-116	3.23798e-112
TCONS_00000531	XLOC_000182	-1.9562	-1.04853	1067.45	1.23151e-116	3.76816e-112
TCONS_00030030	DNAJC2	-0.908685	-1.19918	667.468	2.08548e-116	6.38094e-112
TCONS_00004438	EGR2	-1.20751	-1.57727	720.534	4.98646e-116	1.52561e-111
TCONS_00004439	EGR2	1.20751	1.57727	720.534	4.98646e-116	1.52561e-111
TCONS_00007593	SLC6A12	-0.735439	1.44135	364.284	5.42362e-116	1.65925e-111
TCONS_00029784	GRB10	-1.56642	-1.57828	852.893	7.72536e-116	2.36334e-111
TCONS_00032138	IFNA14	-0.827816	-2.21117	674.263	8.06519e-116	2.46722e-111
TCONS_00029672	NT5C3A	1.44945	0.491547	1128.09	1.05379e-115	3.22354e-111
TCONS_00020691	RBM39	-1.64938	-1.8574	904.895	4.69939e-115	1.4375e-110
TCONS_00174938_add	TRPM3	-0.985247	-2.21355	742.676	4.78587e-115	1.4639e-110
TCONS_00004169	LARP4B	-1.94112	-1.86613	1029.31	6.32999e-115	1.93615e-110
TCONS_00027110	SKIV2L	-0.252054	1.62767	351.265	1.02893e-114	3.14708e-110
TCONS_00000682	HIAT1	0.522264	1.08668	588.319	1.19752e-114	3.66263e-110
TCONS_00025062	DDX60	-1.42056	-1.4321	799.85	1.59581e-114	4.88064e-110
TCONS_00031568	ACO1	2.45799	-1.87423	541.603	5.73474e-114	1.7538e-109
TCONS_00028900	IKZF1	-2.42054	1.39329	682.705	1.07565e-113	3.28946e-109
TCONS_00012731	ELP5	-0.789386	-1.9373	588.473	1.08145e-113	3.30708e-109
TCONS_00022226	TATDN2	-1.25959	-1.0316	805.634	1.43292e-113	4.38172e-109
TCONS_00004674	XLOC_001457	0.893276	2.08718	656.947	1.63633e-113	5.00358e-109
TCONS_00028896	UPP1	-2.48918	0.920034	954.787	3.21285e-113	9.82392e-109
TCONS_00006816	CLEC2D	-0.400102	-1.66297	463.47	3.83043e-113	1.17119e-108
TCONS_00004353	EPC1	1.11352	1.71796	680.106	4.88606e-113	1.49391e-108
TCONS_00004345	ZNF438	-2.06163	-1.24669	1063.12	6.39053e-113	1.95384e-108
TCONS_00023885	PLSCR1	-2.10838	-0.87669	1162.43	6.81637e-113	2.08397e-108
TCONS_00023888	PLSCR1	2.10838	0.87669	1162.43	6.81637e-113	2.08397e-108
TCONS_00015791	ARHGEF1	-2.98813	1.07936	1043.33	1.94042e-112	5.93207e-108
TCONS_00032431	TRIM14	-0.122099	1.49003	379.349	3.07248e-112	9.39257e-108
TCONS_00032437	TRIM14	0.122099	-1.49003	379.349	3.07248e-112	9.39257e-108
TCONS_00031885	TLR4	-2.35949	1.39807	655.955	4.1832e-112	1.27872e-107
TCONS_00022239	ATG7	-1.07431	-1.19031	704.989	4.91833e-112	1.50334e-107
TCONS_00032364	ZCCHC6	-0.576657	0.839044	572.155	6.04741e-112	1.84839e-107
TCONS_00026690	MGAT1	-1.81698	1.2033	583.049	6.51436e-112	1.99105e-107
TCONS_00005622	DDX10	-0.304656	2.21915	324.365	1.04466e-111	3.19281e-107
TCONS_00017677	UGP2	-1.53882	1.17092	532.341	1.10014e-111	3.36225e-107
TCONS_00002956	CD48	1.63703	1.46206	870.406	1.97197e-111	6.02633e-107
TCONS_00002961	CD48	-1.63703	-1.46206	870.406	1.97197e-111	6.02633e-107
TCONS_00024983	CAMK2D	-1.64705	1.64085	388.333	3.16056e-111	9.65805e-107
TCONS_00030618	C8orf44-SGK3	-1.02018	-1.50515	645.532	3.34102e-111	1.02092e-106
TCONS_00029856	NCF1C	-0.743788	-1.00451	652.538	5.26171e-111	1.60772e-106
TCONS_00027240	SRSF3	0.319246	1.28913	484.704	5.92854e-111	1.81135e-106
TCONS_00024918	PPM1K	0.828758	0.680996	807.272	8.37067e-111	2.55741e-106
TCONS_00024920	PPM1K	-0.828758	-0.680996	807.272	8.37067e-111	2.55741e-106
TCONS_00030341	ESYT2	-1.08066	1.59185	324.283	1.99466e-110	6.09368e-106
TCONS_00017679	UGP2	1.53148	-1.20364	511.73	2.89824e-110	8.85356e-106
TCONS_00024824	CXCL3	-3.75163	1.79882	1047.06	5.72014e-110	1.74733e-105
TCONS_00079644_add	GREB1L	-1.02972	-2.10843	721.283	1.17579e-109	3.59157e-105
TCONS_00018162	TANK	1.29858	-1.10973	506.819	1.73134e-109	5.28836e-105
TCONS_00002123	C1orf63	-0.361146	1.00912	481.317	3.60288e-109	1.10046e-104
TCONS_00000871	VPS45	-1.16656	-1.09577	743.832	5.67291e-109	1.73256e-104
TCONS_00026623	HNRNPH1	-1.76414	0.695053	863.833	6.27651e-109	1.91685e-104
TCONS_00006660	H2AFX	0.0694742	-0.96349	514.672	1.63298e-108	4.98694e-104
TCONS_00018167	TANK	-1.302	1.0737	520.128	2.12528e-108	6.49017e-104
TCONS_00031128	NBN	-0.156584	-1.66916	393.184	2.39175e-108	7.30368e-104
TCONS_00006564	MSANTD4	-0.960444	-1.60592	613.598	2.45044e-108	7.48265e-104
TCONS_00103567_add	DIRC3	-0.0610585	-2.54021	568.777	3.21177e-108	9.80713e-104
TCONS_00007215	TBK1	1.52715	1.53249	816.501	3.61658e-108	1.10429e-103
TCONS_00030924	TNFRSF10B	-0.280396	-1.00001	543.283	1.39083e-107	4.24661e-103
TCONS_00003372	ZNF124	-1.33867	0.959272	581.513	1.4024e-107	4.28181e-103
TCONS_00011644	ITGAX	-1.62141	0.619998	881.439	1.50401e-107	4.59188e-103
TCONS_00003316	IRF2BP2	-2.22307	1.60446	525.885	1.69097e-107	5.16254e-103
TCONS_00005264	MALAT1	-0.163556	-2.42688	534.785	2.64631e-107	8.07892e-103
TCONS_00000286	STX12	1.58592	1.73882	847.715	4.35728e-107	1.33019e-102
TCONS_00018893	CEBPZ	1.34285	1.79377	758.806	4.89744e-107	1.49504e-102
TCONS_00008613	FNDC3A	0.845459	0.59469	850.049	4.98333e-107	1.52121e-102
TCONS_00013256	SNX11	-0.899675	-1.87909	606.614	5.63083e-107	1.71881e-102
TCONS_00017950	BCL2L11	-1.4262	1.3887	409.955	9.36948e-107	2.85994e-102
TCONS_00022775	ATP2C1	-1.63395	-0.645572	1057.55	1.14158e-106	3.48445e-102
TCONS_00004964	HIPK3	-1.93592	-1.18906	999.431	1.25222e-106	3.82204e-102
TCONS_00010078	GPR132	-2.69055	0.947397	988.517	1.78027e-106	5.43357e-102
TCONS_00016397	LMNB2	0.717193	-0.992388	482.808	2.81602e-106	8.59449e-102
TCONS_00010671	MTMR10	0.509077	1.42577	489.181	2.84101e-106	8.67047e-102
TCONS_00025705	TNFAIP8	0.763211	-0.772474	602.67	3.06778e-106	9.36225e-102
TCONS_00001438	TOR1AIP1	-1.46935	-1.32054	801.56	3.08665e-106	9.41953e-102
TCONS_00009997	SERPINA1	0.465599	1.38408	484.152	3.22407e-106	9.83856e-102
TCONS_00022746	PARP14	-2.40825	1.08685	800.374	5.99119e-106	1.82821e-101
TCONS_00032915	AKAP17A	-1.61593	0.89272	675.07	6.46383e-106	1.97237e-101
TCONS_00030426	NAT1	-1.64568	-1.7077	865.711	7.36267e-106	2.24657e-101
TCONS_00028403	ZUFSP	-0.86648	-1.75243	578.853	1.26229e-105	3.8515e-101
TCONS_00030869	ERICH1	-0.694302	1.11108	429.69	1.57507e-105	4.80569e-101
TCONS_00112041_add	LINC00158	-0.845523	-2.10266	648.015	1.93512e-105	5.90405e-101
TCONS_00017637	MSH6	-2.59612	2.11856	542.338	1.96349e-105	5.99042e-101
TCONS_00004460	SAR1A	-1.50577	-1.35094	808.947	2.68101e-105	8.17923e-101
TCONS_00003370	ZNF124	1.33259	-0.993717	553.284	4.30334e-105	1.31278e-100
TCONS_00001058	UBAP2L	-2.66331	0.693704	1160.89	6.0129e-105	1.83412e-100
TCONS_00030255	EZH2	0.0697591	1.25388	427.71	6.54157e-105	1.99531e-100
TCONS_00033374	FUNDC2	-1.45961	-1.92738	835.283	8.19273e-105	2.49887e-100
TCONS_00007747	ABCD2	-0.952708	2.10389	237.91	9.07049e-105	2.7665e-100
TCONS_00001717	HLX	-1.02161	-1.2898	646.78	1.13088e-104	3.44908e-100
TCONS_00025402	PTGER4	-0.968967	-1.736	609.448	2.32161e-104	7.08022e-100
TCONS_00073336_add	C17orf85	-1.17696	-1.77326	687.801	2.58549e-104	7.88471e-100
TCONS_00010961	ADPGK	1.72765	0.820943	1003.32	3.2895e-104	1.00313e-99
TCONS_00010964	ADPGK	-1.72765	-0.820943	1003.32	3.2895e-104	1.00313e-99
TCONS_00022714	POGLUT1	-0.981398	-0.850093	745.126	3.99865e-104	1.21931e-99
TCONS_00022893	TSC22D2	-0.966925	-1.04893	676.46	5.29047e-104	1.61317e-99
TCONS_00010505	WHAMM	1.28431	-1.2138	440.875	6.97254e-104	2.126e-99
TCONS_00008621	SETDB2	-2.1353	2.19442	389.283	7.49492e-104	2.2852e-99
TCONS_00031658	CBWD3	-0.847186	-1.66913	563.822	1.24997e-103	3.81104e-99
TCONS_00019391	NR4A2	-0.810495	-1.85891	566.465	2.12773e-103	6.48703e-99
TCONS_00005558	PCF11	-1.42193	0.864888	637.544	2.55051e-103	7.77575e-99
TCONS_00020540	TMX4	-1.07874	-2.0586	730.246	3.40897e-103	1.03926e-98
TCONS_00020541	TMX4	1.07874	2.0586	730.246	3.40897e-103	1.03926e-98
TCONS_00022805	CDV3	-1.51906	-0.60984	1024.64	5.27121e-103	1.60688e-98
TCONS_00029044	GTF2I	-1.1907	-0.904752	783.968	5.28094e-103	1.60979e-98
TCONS_00023191	RAF1	-2.00834	-0.668235	1172.17	5.7434e-103	1.7507e-98
TCONS_00020920	BACH1	1.91479	1.73053	976.029	5.75091e-103	1.75293e-98
TCONS_00020925	BACH1	-1.91479	-1.73053	976.029	5.75091e-103	1.75293e-98
TCONS_00018141	GPD2	-1.9506	-1.61146	975.817	5.77114e-103	1.75899e-98
TCONS_00000235	SRRM1	-1.191	-1.70269	682.422	8.21743e-103	2.50434e-98
TCONS_00026700	MGAT1	-2.1128	-0.934217	1111.23	1.0476e-102	3.19246e-98
TCONS_00012674	XAF1	-1.50318	-1.23674	812.375	1.24973e-102	3.8083e-98
TCONS_00018456	NRP2	-1.2206	0.632255	756.706	1.97767e-102	6.02637e-98
TCONS_00018966	ASB3	-1.68555	-1.87004	912.984	1.99758e-102	6.08682e-98
TCONS_00022722	ADPRH	-1.53527	-1.51217	803.19	2.21394e-102	6.74589e-98
TCONS_00004103	SHOC2	-1.02545	-1.12818	669.002	2.47352e-102	7.53657e-98
TCONS_00031788	NR4A3	-0.822185	-1.08513	619.715	3.27946e-102	9.99185e-98
TCONS_00002359	DMRTA2	-0.831633	-2.1095	652.375	3.51588e-102	1.07118e-97
TCONS_00029842	RFC2	0.187172	1.52663	391.638	3.96263e-102	1.20726e-97
TCONS_00000382	THRAP3	-0.987822	-0.953192	702.208	9.02267e-102	2.74866e-97
TCONS_00022415	CCRL2	-1.50235	-1.52101	788.683	1.00582e-101	3.06401e-97
TCONS_00004979	CD44	0.385771	1.09728	509.67	2.79712e-101	8.52003e-97
TCONS_00006841	KIAA1467	-0.37183	-2.25503	541.446	3.99191e-101	1.2159e-96
TCONS_00004703	MCMBP	-0.51765	-0.860363	616.302	5.05307e-101	1.53906e-96
TCONS_00031262	ENPP2	-0.854516	0.761595	599.414	5.76154e-101	1.75479e-96
TCONS_00010504	WHAMM	-1.28576	1.17664	445.092	8.11746e-101	2.47225e-96
TCONS_00001744_add	AGO3	-0.696539	1.06917	428.681	1.06889e-100	3.25519e-96
TCONS_00000546	DNAJC6	-1.04583	-1.94907	672.924	1.192e-100	3.63e-96
TCONS_00015070	BCL2	-0.389657	2.10996	276.929	1.56552e-100	4.76733e-96
TCONS_00025364	SLC1A3	-0.773941	1.1288	408.158	1.75019e-100	5.32949e-96
TCONS_00025793	MATR3	-1.65467	-1.58475	846.352	2.48041e-100	7.55285e-96
TCONS_00002380	YIPF1	-0.639178	-1.61105	490.892	2.50992e-100	7.64246e-96
TCONS_00057252_add	PATL2	-1.25714	0.991858	521.926	6.10353e-100	1.85834e-95
TCONS_00010075	GPR132	-1.0762	-1.74302	638.411	6.7051e-100	2.04144e-95
TCONS_00014570	CYTH1	-0.599824	-0.706267	701.977	7.12997e-100	2.17072e-95
TCONS_00014575	CYTH1	0.599824	0.706267	701.977	7.12997e-100	2.17072e-95
TCONS_00008711	ARHGEF7	-1.29878	-1.67226	713.16	8.62595e-100	2.626e-95
TCONS_00021548	GTPBP1	-0.898222	-0.692853	777.791	1.26845e-99	3.86128e-95
TCONS_00008852	TSC22D1	1.92563	-1.95066	349.535	2.49594e-99	7.59764e-95
TCONS_00026288	FEM1C	-1.96949	-1.62587	977.109	3.4467e-99	1.04914e-94
TCONS_00014829	LAMA3	-0.397798	-2.26431	570.752	4.69417e-99	1.42881e-94
TCONS_00017030	PLA2G4C	-2.02757	1.97227	371.053	6.43762e-99	1.95942e-94
TCONS_00032165	MOB3B	-0.645999	-1.10989	555.562	6.98245e-99	2.12518e-94
TCONS_00002489	CCBL2	-0.452385	-0.832447	607.394	7.27784e-99	2.21501e-94
TCONS_00009585	BC017818	-2.43635	0.99593	837.256	8.54557e-99	2.60076e-94
TCONS_00006899	STK38L	-0.742882	-1.23372	553.45	8.91909e-99	2.71435e-94
TCONS_00027372	PHF3	-1.42239	-1.91858	821.222	1.68499e-98	5.12759e-94
TCONS_00013015	XLOC_004195	-1.07814	-1.98148	701.585	1.78962e-98	5.4458e-94
TCONS_00011709	CYLD	-0.514608	-1.31405	479.411	2.46211e-98	7.49194e-94
TCONS_00008257	VPS33A	-1.33256	0.581371	809.354	2.46851e-98	7.51119e-94
TCONS_00024886	HNRPDL	-2.3625	0.756255	972.563	2.70428e-98	8.2283e-94
TCONS_00031231	EXT1	-1.72232	1.18161	521.776	2.77014e-98	8.42843e-94
TCONS_00033563	MORF4L2	-1.17724	-0.846851	782.984	2.84318e-98	8.65009e-94
TCONS_00002427	PTGER3	-1.70538	0.765827	754.636	3.03233e-98	9.22525e-94
TCONS_00029675	NT5C3A	-4.47478	0.647272	1967.13	3.14393e-98	9.56445e-94
TCONS_00032696	SETX	-0.0803888	0.870325	515.704	4.2868e-98	1.30405e-93
TCONS_00012825	XLOC_004138	-0.399995	-2.11964	490.188	8.53476e-98	2.5961e-93
TCONS_00008601	FNDC3A	-2.43265	0.677583	1060.37	9.39188e-98	2.85673e-93
TCONS_00032342	FRMD3	-0.816262	-1.43221	544.06	9.56486e-98	2.90925e-93
TCONS_00011356	NOMO1	0.874058	-1.69817	252.438	1.2472e-97	3.79337e-93
TCONS_00032750	CARD9	-2.68439	0.996037	923.738	1.36878e-97	4.16301e-93
TCONS_00016520	ZNF562	-0.434303	-0.89935	571.177	1.50901e-97	4.58935e-93
TCONS_00024213	TBC1D1	-1.30602	-0.648295	911.341	2.2641e-97	6.88557e-93
TCONS_00029605	DAGLB	-1.77197	0.622826	884.371	2.27903e-97	6.93075e-93
TCONS_00029606	DAGLB	1.77197	-0.622826	884.371	2.27903e-97	6.93075e-93
TCONS_00009028	ANKRD10	-0.581326	-1.397	480.667	2.5337e-97	7.70471e-93
TCONS_00076286_add	TEX14	0.154592	2.07795	393.116	2.91195e-97	8.85467e-93
TCONS_00022049_add	AGAP9	-2.01314	0.924329	734.501	3.70807e-97	1.12751e-92
TCONS_00001055	UBAP2L	-2.24699	0.823527	877.557	4.13103e-97	1.25608e-92
TCONS_00008853	TSC22D1	-1.92541	1.91504	349.408	5.09482e-97	1.54908e-92
TCONS_00016396	LMNB2	-0.715269	0.950828	466.622	1.06644e-96	3.24239e-92
TCONS_00031950	SLC25A25	-2.27597	1.2668	633.293	2.0852e-96	6.33963e-92
TCONS_00025365	SLC1A3	-1.99085	-1.69837	994.078	2.53349e-96	7.70233e-92
TCONS_00005559	PCF11	1.41211	-0.897279	589.175	4.22277e-96	1.28372e-91
TCONS_00013298	LUC7L3	-1.22119	-1.26473	686.154	4.27984e-96	1.30103e-91
TCONS_00001607	SRGAP2	-0.624559	0.618847	659.354	5.36651e-96	1.63131e-91
TCONS_00022730	PLA1A	-0.263974	-1.83103	382.316	5.8646e-96	1.78266e-91
TCONS_00028770	ZNRF2	-1.07002	0.890312	531.26	6.3111e-96	1.91832e-91
TCONS_00017013	PLA2G4C	-1.64724	-1.2678	839.407	7.38595e-96	2.24496e-91
TCONS_00011939	XLOC_003833	-1.54496	-1.85212	849.357	7.67572e-96	2.33296e-91
TCONS_00033530	RLIM	0.418097	-0.98682	440.288	8.04475e-96	2.44504e-91
TCONS_00033274	STAG2	-0.145859	-0.695981	618.968	1.40428e-95	4.26788e-91
TCONS_00030553	AGPAT6	1.24912	1.45897	677.687	1.50599e-95	4.57685e-91
TCONS_00031514	CD274	1.89279	1.35924	926.855	3.25473e-95	9.89112e-91
TCONS_00031520	CD274	-1.89279	-1.35924	926.855	3.25473e-95	9.89112e-91
TCONS_00019451	STK39	0.189491	1.48422	373.216	3.6511e-95	1.1095e-90
TCONS_00002125	C1orf63	-1.26482	-0.823625	807.813	3.67268e-95	1.11602e-90
TCONS_00067506_add	TAF1C	-1.3814	1.97909	240.619	6.58231e-95	2.0001e-90
TCONS_00017952	BCL2L11	-1.24904	-1.71942	690.667	8.8004e-95	2.674e-90
TCONS_00002541	TMED5	-1.99793	-0.940957	1034.06	9.61642e-95	2.92176e-90
TCONS_00002542	TMED5	1.99793	0.940957	1034.06	9.61642e-95	2.92176e-90
TCONS_00018291	NABP1	-1.14934	-0.610857	875.177	1.13281e-94	3.44158e-90
TCONS_00024508	IL15	-1.4176	-0.895726	830.362	1.61396e-94	4.90322e-90
TCONS_00032747	CARD9	-2.55533	0.872513	943.849	1.95062e-94	5.92579e-90
TCONS_00009213	KIAA0391	-3.27908	0.684553	1381.48	4.30032e-94	1.30631e-89
TCONS_00120185_add	LOC401074	-1.8271	-1.71157	924.769	4.63388e-94	1.40759e-89
TCONS_00018970	ASB3	-2.08035	1.09445	646.664	5.3448e-94	1.62348e-89
TCONS_00019264	RNF149	-1.25147	0.679056	693.432	6.95433e-94	2.11231e-89
TCONS_00011652	ZNF267	1.41416	1.24765	748.24	7.10175e-94	2.15701e-89
TCONS_00001527	SWT1	-1.79265	-1.7617	924.601	7.49187e-94	2.27543e-89
TCONS_00030091	TFEC	-1.44179	0.736721	691.767	7.98433e-94	2.42492e-89
TCONS_00025216	IRF2	-0.426866	-0.632479	689.788	1.11014e-93	3.37148e-89
TCONS_00006840	KIAA1467	0.364282	2.1751	519.026	1.38242e-93	4.19828e-89
TCONS_00028769	ZNRF2	0.442563	-0.911425	464.812	1.6652e-93	5.05688e-89
TCONS_00029133	STAG3	-1.64658	1.39485	402.936	2.1349e-93	6.48263e-89
TCONS_00023934	RPL22L1	-0.405256	1.25292	339.114	2.46158e-93	7.47435e-89
TCONS_00028054	PSMB8	-2.59329	2.28537	611.868	2.56462e-93	7.78695e-89
TCONS_00025371	SLC1A3	-2.34369	-1.43139	1109.42	3.26238e-93	9.90523e-89
TCONS_00021192	RUNX1	-2.44098	0.982924	825.942	3.70133e-93	1.12376e-88
TCONS_00033412	AP1S2	-1.8624	-0.618434	1104.84	7.00778e-93	2.12749e-88
TCONS_00030885	MFHAS1	0.290213	-1.05563	405.316	1.07675e-92	3.2687e-88
TCONS_00002663	POLR3C	0.94123	1.46073	563.585	1.80028e-92	5.46492e-88
TCONS_00011964	TCF25	-1.86757	-0.864417	996.503	3.1973e-92	9.7054e-88
TCONS_00024452	C4orf32	-1.16838	-1.21814	661.121	3.7888e-92	1.15005e-87
TCONS_00013957	SSH2	-1.95152	1.62547	400.226	4.00233e-92	1.21483e-87
TCONS_00023820	ISY1-RAB43	-1.21426	-0.717633	825.8	5.48526e-92	1.66489e-87
TCONS_00008511	USPL1	-2.76945	0.855269	1027.78	8.44667e-92	2.56365e-87
TCONS_00030424	NAT1	0.779545	1.50804	508.713	1.11185e-91	3.37446e-87
TCONS_00009859	MAX	-1.4503	-0.647697	936.306	1.43272e-91	4.34816e-87
TCONS_00019850	PANK2	-0.5731	-0.493759	809.552	1.50534e-91	4.56827e-87
TCONS_00029640	HNRNPA2B1	-0.376454	-0.504189	768.112	2.11882e-91	6.42957e-87
TCONS_00004980	CD44	-2.96748	0.979486	1021.37	2.53124e-91	7.68081e-87
TCONS_00031951	SLC25A25	-1.97775	-1.16122	967.243	2.60933e-91	7.91748e-87
TCONS_00025410_add	IGF2-AS	-1.9209	-1.70444	962.286	2.75224e-91	8.35086e-87
TCONS_00027268	FGD2	-1.78341	0.679527	815.816	3.37572e-91	1.02423e-86
TCONS_00029373	TMEM140	-0.987332	1.3068	325.836	3.49367e-91	1.05998e-86
TCONS_00012168	LOC23117	-0.556459	-0.763449	629.846	4.36317e-91	1.3237e-86
TCONS_00011647	ITGAX	-1.8859	-0.941278	975.735	5.02107e-91	1.52324e-86
TCONS_00008271	RSRC2	-3.21736	1.67738	822.871	5.51837e-91	1.67405e-86
TCONS_00030153	ZNF800	-1.93017	-1.68183	959.654	5.79361e-91	1.75749e-86
TCONS_00010338	RAB8B	-1.37661	-1.22676	727.179	5.99893e-91	1.81971e-86
TCONS_00031226	EXT1	-0.749306	-1.01418	577.347	7.28013e-91	2.20828e-86
TCONS_00029917	CDK6	-1.85781	-1.36078	898.862	7.36688e-91	2.23452e-86
TCONS_00001001	INTS3	-2.79864	0.78845	1084.84	7.55684e-91	2.29206e-86
TCONS_00027339	TMEM63B	-1.3323	-1.01059	753.726	7.63161e-91	2.31467e-86
TCONS_00024161	CPEB2	-0.332763	0.602011	639.151	9.75686e-91	2.95916e-86
TCONS_00022884	RNF13	-0.935542	-0.483315	893.713	1.00556e-90	3.04967e-86
TCONS_00010423	PML	-1.96407	0.475165	1067.15	1.20829e-90	3.66439e-86
TCONS_00028221	MRPL14	-1.40491	-1.19729	740.087	1.48526e-90	4.50419e-86
TCONS_00009036	ANKRD10	-0.937322	0.990671	441.746	1.93417e-90	5.86537e-86
TCONS_00006634	AMICA1	0.278583	-1.34491	313.119	2.10671e-90	6.38839e-86
TCONS_00006636	AMICA1	-0.278583	1.34491	313.119	2.10671e-90	6.38839e-86
TCONS_00008246	KDM2B	-1.5135	-1.1139	792.468	2.6799e-90	8.12599e-86
TCONS_00009177	RNF31	-3.11054	1.1122	995.35	6.23347e-90	1.88999e-85
TCONS_00030392	ERI1	1.1614	1.48872	628.951	7.23426e-90	2.19335e-85
TCONS_00030393	ERI1	-1.1614	-1.48872	628.951	7.23426e-90	2.19335e-85
TCONS_00006284	WDR74	-1.75009	1.29176	451.194	7.81517e-90	2.36933e-85
TCONS_00004209	IL15RA	-2.01161	0.801145	786.614	1.48101e-89	4.48983e-85
TCONS_00024585	RAPGEF2	-0.620828	-0.488096	815.136	1.69636e-89	5.14252e-85
TCONS_00008489	XLOC_002712	-0.082475	-0.966998	458.209	1.81929e-89	5.51498e-85
TCONS_00026495	TNIP1	-1.78762	0.978803	607.58	1.89982e-89	5.75893e-85
TCONS_00009386	PCNX	-1.05045	0.820071	543.682	2.30017e-89	6.97227e-85
TCONS_00011748	CPNE2	-0.238616	1.26169	331.979	2.8281e-89	8.57225e-85
TCONS_00006285	WDR74	1.73868	-1.32005	435.544	2.83043e-89	8.57905e-85
TCONS_00031762	NANS	-1.87818	0.915528	669.447	2.88355e-89	8.73976e-85
TCONS_00006661	H2AFX	-0.0689202	0.916568	460.466	6.10093e-89	1.84907e-84
TCONS_00030964	WHSC1L1	-0.991908	0.762112	569.613	7.86519e-89	2.38363e-84
TCONS_00028825	STK17A	-2.73105	0.696081	1123.99	1.09979e-88	3.33281e-84
TCONS_00028283	HMGN3	-1.8878	-1.05664	939.842	1.13885e-88	3.45107e-84
TCONS_00026471	TNIP1	-2.4245	1.40194	599.913	1.22343e-88	3.70725e-84
TCONS_00026339	AFF4	-0.275223	0.998988	411.591	1.23809e-88	3.75155e-84
TCONS_00024515	ABCE1	-2.18079	0.750435	875.887	1.39904e-88	4.23908e-84
TCONS_00029999	LRCH4	-2.54155	0.667719	1073.82	1.90621e-88	5.77561e-84
TCONS_00028718	ITGB8	-0.0316712	-2.23851	443.587	2.78615e-88	8.44121e-84
TCONS_00016857	PAF1	-2.43768	0.97003	814.027	2.79114e-88	8.45605e-84
TCONS_00028498	LATS1	0.220885	0.718648	585.711	3.38739e-88	1.02621e-83
TCONS_00004303	ABI1	-1.88498	-0.801788	1009.06	4.68538e-88	1.41939e-83
TCONS_00017545	BRE	-2.12044	-0.851844	1083.74	7.15228e-88	2.16657e-83
TCONS_00001829	KMO	0.158561	-1.12199	372.69	8.13307e-88	2.46359e-83
TCONS_00004961	HIPK3	-0.227395	0.836129	483.158	8.57834e-88	2.59838e-83
TCONS_00032594	DENND1A	0.342934	-0.59805	630.272	9.43343e-88	2.85729e-83
TCONS_00014943	LPIN2	-1.46271	1.3307	368.204	9.69099e-88	2.93521e-83
TCONS_00018882_add	AGAP9	-0.119674	-0.92209	473.308	1.11739e-87	3.38424e-83
TCONS_00004456	SAR1A	-0.564016	-0.723743	637.565	1.33116e-87	4.03154e-83
TCONS_00116049_add	MB	-0.0229722	-2.31292	520.45	1.81202e-87	5.48751e-83
TCONS_00012488	XLOC_004047	-1.76921	2.27213	298.587	1.89702e-87	5.74456e-83
TCONS_00028443	BCLAF1	-2.19877	-0.891837	1098.94	8.2082e-87	2.48536e-82
TCONS_00028383	REV3L	-1.87	-1.59013	908.496	9.02662e-87	2.73308e-82
TCONS_00031277	ZHX1-C8ORF76	0.211721	-0.527008	684.258	9.53578e-87	2.88715e-82
TCONS_00004343	ZNF438	-0.779336	1.10151	366.195	9.94587e-87	3.01121e-82
TCONS_00018581	SGPP2	-0.0386722	-1.81618	305.512	1.0169e-86	3.07867e-82
TCONS_00024464	SNHG8	1.36537	-1.51323	292.922	1.09057e-86	3.3016e-82
TCONS_00028752	CREB5	-1.67356	1.12773	490.814	1.35711e-86	4.10837e-82
TCONS_00009884	ZFYVE26	-2.94549	1.44344	767.807	1.92855e-86	5.83811e-82
TCONS_00020053	SRSF6	-1.0427	0.824353	527.981	2.10611e-86	6.37541e-82
TCONS_00012441	MLKL	-2.69002	0.852738	977.477	2.28121e-86	6.90521e-82
TCONS_00024722	ARAP2	-0.669496	0.720346	551.749	2.54536e-86	7.70455e-82
TCONS_00004197	XLOC_001310	-2.04938	-1.62333	993.538	2.59531e-86	7.85548e-82
TCONS_00017684	AFTPH	0.00305902	0.804368	507.511	4.04583e-86	1.22455e-81
TCONS_00024727	ARAP2	-1.93145	-0.901539	985.722	4.39016e-86	1.32873e-81
TCONS_00030799	ZNF707	-0.889521	-0.844422	652.609	5.45457e-86	1.65082e-81
TCONS_00022892	TSC22D2	-0.20513	1.06467	380.127	7.34473e-86	2.22281e-81
TCONS_00025006	XLOC_007838	-2.16521	-1.33497	1011.08	8.36179e-86	2.53053e-81
TCONS_00025007	XLOC_007838	2.16521	1.33497	1011.08	8.36179e-86	2.53053e-81
TCONS_00016824	HNRNPL	1.53978	1.15062	778.792	8.59674e-86	2.60146e-81
TCONS_00014839	DTNA	-0.594104	0.853106	466.155	1.04295e-85	3.15595e-81
TCONS_00014840	DTNA	0.594104	-0.853106	466.155	1.04295e-85	3.15595e-81
TCONS_00040100_add	RERG	0.244768	-2.37559	453.79	1.12045e-85	3.39026e-81
TCONS_00024596	KLHL2	-1.03583	-1.73219	601.556	1.25419e-85	3.7948e-81
TCONS_00025412	ZNF131	-0.928438	0.95193	439.822	1.64775e-85	4.98544e-81
TCONS_00033373	FUNDC2	1.41743	1.76774	771.578	1.82841e-85	5.53184e-81
TCONS_00030037	SRPK2	2.09376	-0.873285	745.693	4.40501e-85	1.33265e-80
TCONS_00007971	STAT6	1.70593	-1.54858	339.95	5.20481e-85	1.57456e-80
TCONS_00004611	SLC25A28	-1.56968	0.560304	835.235	5.96551e-85	1.80463e-80
TCONS_00003983	XLOC_001229	0.341535	2.08204	489.309	7.09064e-85	2.14492e-80
TCONS_00029702	XLOC_009295	0.860853	0.85429	636.401	7.77535e-85	2.35196e-80
TCONS_00004444	JMJD1C	0.0507531	-0.981083	418.969	9.8089e-85	2.967e-80
TCONS_00000576	RABGGTB	0.228603	1.00014	447.03	1.62778e-84	4.92338e-80
TCONS_00004415	PARG	-1.89894	0.412362	1097.21	1.69346e-84	5.12188e-80
TCONS_00027376	FAM135A	-2.83232	0.965575	950.057	1.86848e-84	5.65102e-80
TCONS_00008690	UBAC2	-2.1513	0.810589	804.742	2.01802e-84	6.10308e-80
TCONS_00024817	ANKRD17	-0.963155	-0.825485	672.509	4.38169e-84	1.32502e-79
TCONS_00008261	ZCCHC8	-0.795365	-0.763749	654.953	4.99014e-84	1.50897e-79
TCONS_00033529	RLIM	-0.415857	0.943109	412.274	5.14002e-84	1.55424e-79
TCONS_00001029	SLC27A3	-1.19199	1.24841	338.991	9.11016e-84	2.75464e-79
TCONS_00028792	BC043356	-0.741566	-0.671087	688.749	9.64603e-84	2.91657e-79
TCONS_00028808	BC043356	0.741566	0.671087	688.749	9.64603e-84	2.91657e-79
TCONS_00021182	RCAN1	0.51153	0.879803	539.386	1.11104e-83	3.35913e-79
TCONS_00029276	ST7	-1.56624	-0.961154	820.643	1.33651e-83	4.04068e-79
TCONS_00024669	AFAP1	-0.385592	-1.66525	373.595	1.58839e-83	4.80202e-79
TCONS_00033660	CD99L2	1.67146	1.50155	807.01	1.67357e-83	5.05938e-79
TCONS_00013461	SNHG16	1.31344	-1.60472	253.061	1.72977e-83	5.2291e-79
TCONS_00028915	IKZF1	-0.613055	-0.654031	669.656	1.74788e-83	5.28368e-79
TCONS_00026643	HNRNPH1	-2.59905	0.50546	1235.38	1.93496e-83	5.84901e-79
TCONS_00007968	STAT6	-1.7103	1.51632	343.754	2.82848e-83	8.54966e-79
TCONS_00024463	SNHG8	-1.36311	1.47455	290.175	3.4007e-83	1.02786e-78
TCONS_00001015	SLC27A3	-2.03198	-0.92097	1008.32	3.61846e-83	1.09364e-78
TCONS_00025039	OTUD4	-2.29134	0.879592	799.79	3.81043e-83	1.15163e-78
TCONS_00029278	ST7	-0.20116	0.835211	465.383	4.27612e-83	1.29233e-78
TCONS_00015796	CIC	-0.132831	-0.744413	539.303	5.15456e-83	1.55776e-78
TCONS_00014007	SLFN12	0.0520293	-0.789399	497.113	7.13258e-83	2.15546e-78
TCONS_00026350	SAR1B	-2.72428	0.482231	1308.92	9.37182e-83	2.83198e-78
TCONS_00018452	NRP2	-1.2858	0.89013	513.7	1.88223e-82	5.68734e-78
TCONS_00009700	ACIN1	-1.84742	0.532668	933.329	2.07157e-82	6.25925e-78
TCONS_00014588	CANT1	-0.399375	0.888877	430.54	2.40834e-82	7.27657e-78
TCONS_00136025_add	LOC153684	0.557724	-0.702255	539.98	2.54112e-82	7.67749e-78
TCONS_00002815	ADAR	-0.961733	-0.86558	649.178	2.70417e-82	8.16984e-78
TCONS_00033562	MORF4L2	-1.50993	-1.04345	774.63	2.98283e-82	9.01143e-78
TCONS_00030352	ESYT2	-2.35166	1.29241	596.877	3.04744e-82	9.20631e-78
TCONS_00000161	SPEN	-0.716694	-1.16506	497.439	3.24951e-82	9.81643e-78
TCONS_00025495	SMA4	0.0963854	-1.01557	391.183	3.61817e-82	1.09298e-77
TCONS_00132866_add	LOC100506746	-0.908611	0.787745	514.751	3.81981e-82	1.15385e-77
TCONS_00006924	KIAA1551	-0.478159	0.661692	563.39	3.94123e-82	1.19049e-77
TCONS_00018624	SP100	-1.18313	-0.471851	934.717	4.16339e-82	1.25755e-77
TCONS_00020136	ZFAS1	-2.72946	1.07169	838.2	4.29768e-82	1.29807e-77
TCONS_00030151	ZNF800	-0.405059	0.811838	467.575	8.70239e-82	2.62812e-77
TCONS_00023196	RAF1	0.369882	1.36464	376.469	1.88136e-81	5.68151e-77
TCONS_00029230	HBP1	-1.75815	-0.621111	1018.06	1.95746e-81	5.91114e-77
TCONS_00032914	AKAP17A	-0.755955	-1.08227	523.145	2.12389e-81	6.41352e-77
TCONS_00027695	MAP3K4	-0.711216	-1.48753	456.134	2.49505e-81	7.53406e-77
TCONS_00022231	HRH1	-2.17721	2.28359	503.419	2.56019e-81	7.73051e-77
TCONS_00026078	RANBP3L	-1.96694	-1.55989	937.852	3.46939e-81	1.04751e-76
TCONS_00010801	ATP8B4	-0.732385	-1.49413	461.956	3.53183e-81	1.06633e-76
TCONS_00005369	KDM2A	0.586643	0.796121	579.984	3.74871e-81	1.13177e-76
TCONS_00005372	KDM2A	-0.586643	-0.796121	579.984	3.74871e-81	1.13177e-76
TCONS_00141434_add	CLK4	-2.15849	0.812665	791.872	4.39898e-81	1.32801e-76
TCONS_00027520	NCOA7	-4.25852	1.07815	1480.57	6.86832e-81	2.07334e-76
TCONS_00012844	ADORA2B	0.266344	1.57282	334.643	7.65997e-81	2.31224e-76
TCONS_00030886	MFHAS1	-0.288169	1.01015	374.343	8.56447e-81	2.58518e-76
TCONS_00019579	CLK1	-1.52239	0.80734	609	9.20144e-81	2.77736e-76
TCONS_00031634	FAM95B1	-1.19933	-1.05386	659.166	9.24563e-81	2.79061e-76
TCONS_00017601	GALM	1.64866	1.05787	816.35	1.19101e-80	3.5947e-76
TCONS_00010738	PLCB2	-2.65815	0.943266	881.406	1.36861e-80	4.1306e-76
TCONS_00022749	DIRC2	-1.57399	0.598943	781.077	2.47474e-80	7.46826e-76
TCONS_00022750	DIRC2	1.57399	-0.598943	781.077	2.47474e-80	7.46826e-76
TCONS_00031632	DQ588135	-1.87441	1.46483	387.279	3.18338e-80	9.60584e-76
TCONS_00027019	MICA	-2.8365	1.03747	891.173	4.01799e-80	1.21235e-75
TCONS_00002343	MKNK1	-1.53369	0.473596	894.196	5.05546e-80	1.52533e-75
TCONS_00018794	PUM2	-2.10412	1.2991	507.323	6.75788e-80	2.03885e-75
TCONS_00032286	LOC440896	-1.04427	-1.60404	571.283	6.75807e-80	2.03885e-75
TCONS_00029274	ST7	-0.726363	-0.548198	748.61	6.90799e-80	2.084e-75
TCONS_00022723	ADPRH	-0.148882	0.847517	447.683	1.05163e-79	3.17245e-75
TCONS_00018237	MIR548N	-0.262794	-0.613666	620.397	1.23415e-79	3.72292e-75
TCONS_00004941	PRRG4	-1.48295	-0.817767	819.587	2.34607e-79	7.07691e-75
TCONS_00028951	CCT6P1	-1.94108	-1.51287	913.948	3.97248e-79	1.19822e-74
TCONS_00008270	RSRC2	-0.599873	0.78693	475.366	4.35201e-79	1.31265e-74
TCONS_00024282	RUFY3	-1.2147	0.528835	754.55	5.31256e-79	1.60232e-74
TCONS_00015329	C19orf66	-1.35192	-0.513989	938.049	6.99393e-79	2.10937e-74
TCONS_00028953	CCT6P1	-0.665107	-1.47635	434.938	7.28281e-79	2.19642e-74
TCONS_00001715	HLX	1.0022	1.20454	559.65	7.90985e-79	2.38545e-74
TCONS_00031851	DNAJC25	-1.26805	1.06297	405.517	1.03084e-78	3.1087e-74
TCONS_00000486	NASP	-1.84806	-0.776468	966.004	1.1532e-78	3.47759e-74
TCONS_00022840	MRAS	-0.775807	-0.762535	627.684	1.34012e-78	4.04115e-74
TCONS_00004591_add	LINC00869	-1.4041	-1.4336	684.65	1.34813e-78	4.06515e-74
TCONS_00017894	MAP4K4	-1.30696	-1.30505	650.009	1.47462e-78	4.44628e-74
TCONS_00007590	SLC6A12	-0.992662	-0.700953	713.86	1.64293e-78	4.95359e-74
TCONS_00014969	PTPN2	-1.58463	-0.365479	1149.04	1.6635e-78	5.01544e-74
TCONS_00010768	ZNF106	-1.60073	0.929247	542.812	1.87589e-78	5.65563e-74
TCONS_00022729	PLA1A	0.255399	1.69442	329.063	1.99871e-78	6.02572e-74
TCONS_00001358	RCSD1	-1.85003	-1.47077	866.777	2.11235e-78	6.36809e-74
TCONS_00023171	CIDEC	0.877097	0.573884	758.738	2.21385e-78	6.67386e-74
TCONS_00023174	CIDEC	-0.877097	-0.573884	758.738	2.21385e-78	6.67386e-74
TCONS_00021896	TMEM184B	0.145706	-1.14347	328.296	2.5356e-78	7.64333e-74
TCONS_00028779	AVL9	-1.18216	0.770752	550.695	2.54333e-78	7.66637e-74
TCONS_00001989	RERE	-1.98158	-0.773856	1016.74	3.36803e-78	1.01519e-73
TCONS_00023316	ZDHHC3	0.394365	-0.494707	679.352	4.34271e-78	1.30894e-73
TCONS_00008670	IRG1	-1.64477	-1.60013	810.216	4.76569e-78	1.43638e-73
TCONS_00017552	FOSL2	-1.07068	1.13935	340.919	5.98733e-78	1.8044e-73
TCONS_00012262	BOLA2	-0.156933	-0.58633	618.409	1.48007e-77	4.46003e-73
TCONS_00031642	CBWD5	-1.17042	-1.32678	597.021	1.69133e-77	5.09649e-73
TCONS_00010603	CHD2	-1.39124	-0.97584	729.492	1.78175e-77	5.36876e-73
TCONS_00002632	ZNF697	-0.971993	-1.54791	532.967	1.9371e-77	5.83667e-73
TCONS_00028777	AVL9	1.17665	-0.805884	522.529	2.62516e-77	7.9096e-73
TCONS_00030779	RHPN1	-0.0259268	-0.954866	405.128	3.33538e-77	1.00488e-72
TCONS_00008768	ZDHHC20	-1.66072	1.11059	457.295	4.63841e-77	1.39732e-72
TCONS_00005824	IRF7	-1.81197	0.450945	988.348	7.32899e-77	2.20778e-72
TCONS_00000956	TNFAIP8L2-SCNM1	-0.36038	-0.836534	499.38	9.63008e-77	2.90087e-72
TCONS_00002919	ARHGEF11	-2.67541	0.548934	1189.71	1.09265e-76	3.29117e-72
TCONS_00028402	ZUFSP	0.831863	1.5631	484.713	1.33555e-76	4.02269e-72
TCONS_00015845	CLASRP	-2.56215	0.809485	919.03	1.53408e-76	4.62049e-72
TCONS_00031533	CNTLN	0.228839	0.770997	509.245	1.57983e-76	4.75814e-72
TCONS_00032166	MOB3B	0.636553	1.04768	481.427	1.58018e-76	4.75903e-72
TCONS_00021844	APOL3	-1.40611	-0.462299	986.424	1.64065e-76	4.94099e-72
TCONS_00001827	KMO	-0.157191	1.07458	341.111	1.69172e-76	5.09461e-72
TCONS_00013460	SNHG16	-1.30512	1.52483	244.448	2.04983e-76	6.17265e-72
TCONS_00009553	EVL	-2.81609	0.545239	1248.92	2.10261e-76	6.33137e-72
TCONS_00031328	ST3GAL1	-0.367482	0.762081	471.47	2.86818e-76	8.63638e-72
TCONS_00031329	ST3GAL1	0.367482	-0.762081	471.47	2.86818e-76	8.63638e-72
TCONS_00010594	LOC100507217	0.613259	-0.819495	443.968	4.91437e-76	1.47967e-71
TCONS_00018886_add	AGAP9	-2.15949	0.744536	820.516	5.59748e-76	1.68523e-71
TCONS_00033340	SLC6A8	-0.876678	-1.58895	502.419	5.89366e-76	1.77435e-71
TCONS_00031655	CBWD3	-2.40952	1.20217	632.278	6.49546e-76	1.95546e-71
TCONS_00002169	PUM1	-1.81265	-1.28449	834.854	7.24866e-76	2.18214e-71
TCONS_00022713	POGLUT1	-1.19104	-1.03241	640.724	9.78414e-76	2.94532e-71
TCONS_00027253	FGD2	0.645429	-0.684562	528.614	1.04938e-75	3.15886e-71
TCONS_00001373	TBX19	-0.396811	-0.505478	703.695	1.06789e-75	3.21445e-71
TCONS_00029891	SEMA3D	0.207499	-2.03857	288.749	1.26779e-75	3.81605e-71
TCONS_00031635	DQ588135	-0.0448463	-1.72543	274.633	1.35403e-75	4.07549e-71
TCONS_00011708	CYLD	-2.75622	1.09607	809.67	1.38513e-75	4.16898e-71
TCONS_00017866	MAP4K4	-1.56634	1.01555	474.984	1.63924e-75	4.93361e-71
TCONS_00002526	GBP4	-1.47913	-0.654259	875.297	1.6897e-75	5.08532e-71
TCONS_00067488_add	TAF1C	-2.48167	1.79043	523.736	1.86918e-75	5.6253e-71
TCONS_00002258	STK40	-1.87696	-0.517578	1101.93	2.24495e-75	6.75596e-71
TCONS_00001641	SRGAP2	-1.58398	-0.420719	1077.56	2.26754e-75	6.82372e-71
TCONS_00023194	RAF1	-0.916998	-1.54776	509.505	2.34584e-75	7.05911e-71
TCONS_00000680	HIAT1	-2.14987	0.35738	1220.68	2.51174e-75	7.55806e-71
TCONS_00031881	C9orf91	-1.39965	-0.682986	832.691	2.77651e-75	8.35453e-71
TCONS_00022038_add	AGAP9	-2.15434	0.841649	745.223	3.33764e-75	1.00426e-70
TCONS_00029249	ZNF277	-1.2516	-1.40323	616.942	4.12956e-75	1.2425e-70
TCONS_00028954	CCT6P1	-1.02614	-1.4617	539.061	4.47413e-75	1.34613e-70
TCONS_00157482_add	WDR60	-1.49121	-1.62705	757.76	4.48288e-75	1.34872e-70
TCONS_00008922	INTS6	-0.927116	0.540362	673.041	6.28668e-75	1.89129e-70
TCONS_00014678	C17orf62	-1.94574	0.716242	767.134	9.01195e-75	2.71107e-70
TCONS_00019873	MGME1	-0.722939	-1.0074	506.374	1.00746e-74	3.03066e-70
TCONS_00009885	ZFYVE26	2.84518	-1.4067	709.695	1.03076e-74	3.10061e-70
TCONS_00005951	ZBED5	-0.833305	-0.63461	692.446	1.1259e-74	3.38672e-70
TCONS_00010503	IL16	-1.87418	1.9044	311.235	1.17641e-74	3.53852e-70
TCONS_00005241	VPS51	-0.729101	-1.62681	456.18	1.27152e-74	3.82447e-70
TCONS_00011710	CYLD	-0.898188	0.850269	443.43	1.46721e-74	4.41292e-70
TCONS_00019892	RIN2	-1.14224	1.32493	269.652	1.65423e-74	4.97527e-70
TCONS_00028756	CREB5	-1.47672	1.24799	348.633	1.80262e-74	5.42138e-70
TCONS_00031216	TRPS1	-0.251603	1.26581	269.633	1.93487e-74	5.81892e-70
TCONS_00032697	SETX	-1.0375	-0.801708	661.913	1.9988e-74	6.011e-70
TCONS_00009586	BC017818	2.37275	-0.993813	720.406	2.52588e-74	7.59582e-70
TCONS_00018569	STK16	-1.1001	1.08761	350.15	2.79835e-74	8.41492e-70
TCONS_00018176	GCA	-1.58079	-0.575742	950.614	2.82737e-74	8.50191e-70
TCONS_00026397	SRA1	-1.45972	-1.42196	694.239	2.96626e-74	8.91924e-70
TCONS_00027559	TNFAIP3	-2.8492	1.10299	836.272	3.9621e-74	1.19132e-69
TCONS_00011981	LUC7L	-2.21143	0.947024	692.002	4.07034e-74	1.22383e-69
TCONS_00020618	BCL2L1	1.28049	-0.545667	728.959	1.00971e-73	3.0358e-69
TCONS_00004102	SHOC2	1.00683	1.05195	569.17	1.31218e-73	3.94506e-69
TCONS_00027918	DDX39B	-2.63029	0.795086	942.499	1.50235e-73	4.51667e-69
TCONS_00012330	AMFR	-0.542566	-0.848521	514.019	2.06542e-73	6.20908e-69
TCONS_00016521	ZNF562	0.429307	0.847558	492.03	2.07518e-73	6.23819e-69
TCONS_00032592	DENND1A	-0.342143	0.557001	601.203	2.07717e-73	6.24397e-69
TCONS_00000870	VPS45	1.14389	1.01458	619.644	2.45118e-73	7.36799e-69
TCONS_00017839	ARID5A	-1.32292	0.654907	641.104	2.5484e-73	7.65998e-69
TCONS_00026137	IL6ST	-0.821128	-1.26557	474.471	3.40572e-73	1.02362e-68
TCONS_00026138	IL6ST	0.821128	1.26557	474.471	3.40572e-73	1.02362e-68
TCONS_00032140	IFNA14	-1.47602	-1.61542	749.546	3.51115e-73	1.05524e-68
TCONS_00030617	C8orf44-SGK3	-1.96032	1.12378	514.502	3.612e-73	1.08551e-68
TCONS_00023660	CGGBP1	-0.164587	0.849453	416.75	3.69031e-73	1.10901e-68
TCONS_00025851	ZMAT2	-0.513062	0.773834	452.859	3.79127e-73	1.13932e-68
TCONS_00022297	NR1D2	-0.696682	-1.04831	481.274	4.45852e-73	1.33979e-68
TCONS_00022298	NR1D2	0.696682	1.04831	481.274	4.45852e-73	1.33979e-68
TCONS_00023780	HSPBAP1	-0.883832	-1.77322	581.942	6.03741e-73	1.81412e-68
TCONS_00025540	PAPD4	-0.903252	-0.441335	847.168	6.34529e-73	1.90657e-68
TCONS_00003671	CREM	-0.949742	-0.685725	685.192	6.59148e-73	1.98048e-68
TCONS_00031848	PALM2-AKAP2	-0.96479	-0.816125	627.744	9.70229e-73	2.91486e-68
TCONS_00009408	RBM25	0.589424	0.641812	623.204	2.47381e-72	7.43183e-68
TCONS_00020620	BCL2L1	-1.96604	0.482452	980.956	2.75769e-72	8.28439e-68
TCONS_00023438	UBA7	0.643498	-0.653051	534.917	3.35506e-72	1.00786e-67
TCONS_00008921	INTS6	0.923391	-0.577668	626.46	3.43066e-72	1.03054e-67
TCONS_00027374	FAM135A	-0.413549	0.838047	410.393	5.06162e-72	1.52036e-67
TCONS_00014012	CCL5	1.09786	0.757973	687.441	5.24356e-72	1.57496e-67
TCONS_00011080	POLG	-1.31629	-1.05808	660.974	5.59434e-72	1.68026e-67
TCONS_00011899	PLCG2	-0.275945	-1.46796	310.713	7.07669e-72	2.12541e-67
TCONS_00008766	ZDHHC20	-0.805041	-0.822909	578.221	7.80713e-72	2.34472e-67
TCONS_00002817	ADAR	-0.000826913	0.58093	581.996	1.37823e-71	4.13909e-67
TCONS_00026891	BTN2A1	0.634179	-0.911645	376.492	1.46153e-71	4.38911e-67
TCONS_00030931	TNFRSF10A	0.507056	-0.719275	477.585	2.61989e-71	7.86752e-67
TCONS_00002734	PI4KB	-0.401587	0.777099	440.06	2.89128e-71	8.68221e-67
TCONS_00007676	CLEC7A	-2.3201	0.569151	1008.48	3.14076e-71	9.43108e-67
TCONS_00007636	ZNF384	-0.754693	-1.12034	471.098	3.73376e-71	1.12114e-66
TCONS_00011982	LUC7L	-1.09023	-1.36464	547.079	3.90848e-71	1.17356e-66
TCONS_00020062	YWHAB	-1.56536	-0.489358	991.059	6.75751e-71	2.02887e-66
TCONS_00020063	YWHAB	1.56536	0.489358	991.059	6.75751e-71	2.02887e-66
TCONS_00016638	STX10	-1.11059	-1.72312	665.634	8.25504e-71	2.47833e-66
TCONS_00029138	PILRB	-1.34051	-1.23898	638.819	8.34786e-71	2.50611e-66
TCONS_00014429	ERN1	-1.41723	-0.774359	776.008	9.94514e-71	2.98553e-66
TCONS_00025442	GPBP1	-0.715839	-0.648281	637.073	2.08861e-70	6.2696e-66
TCONS_00019123	MOB1A	0.0147837	0.345833	812.154	2.87145e-70	8.61923e-66
TCONS_00019124	MOB1A	-0.0147837	-0.345833	812.154	2.87145e-70	8.61923e-66
TCONS_00003654	MAP3K8	-2.42351	0.535759	1076.51	2.91371e-70	8.74551e-66
TCONS_00021765	CHEK2	-0.242635	-1.22937	326.738	3.59389e-70	1.07867e-65
TCONS_00032149	KLHL9	-1.70033	-1.31982	771.848	5.07502e-70	1.52311e-65
TCONS_00006551	CASP1	-0.994645	0.404345	807.284	5.68531e-70	1.70622e-65
TCONS_00001376	TBX19	-0.255141	0.582478	563.816	6.23342e-70	1.87059e-65
TCONS_00023259	AZI2	-1.81178	-0.715337	938.982	6.82703e-70	2.04859e-65
TCONS_00025490	SMA4	-0.783236	1.1776	266.581	7.58285e-70	2.27523e-65
TCONS_00032204	DDX58	-0.512637	0.53919	606.194	8.22006e-70	2.46635e-65
TCONS_00006279	STX5	-0.242715	-0.672526	535.052	8.79822e-70	2.63973e-65
TCONS_00019494	ATF2	-3.23125	1.56636	845.479	9.50074e-70	2.85041e-65
TCONS_00017920	IL1R1	-1.24089	-1.10422	616.826	1.01832e-69	3.05506e-65
TCONS_00005424	TCIRG1	-1.63364	0.573714	772.569	1.10766e-69	3.32299e-65
TCONS_00006568	MSANTD4	0.0332155	0.899647	394	1.23152e-69	3.69443e-65
TCONS_00022704	QTRTD1	0.469624	0.850813	480.844	1.29088e-69	3.87238e-65
TCONS_00002426	PTGER3	-3.55054	1.14399	1088.59	1.42546e-69	4.27595e-65
TCONS_00030453	SORBS3	-0.676784	-1.31434	414.07	1.46546e-69	4.39579e-65
TCONS_00022906	MBNL1	-1.95481	0.512073	931.183	2.10527e-69	6.31475e-65
TCONS_00028499	LATS1	-2.13514	0.686693	828.331	2.13568e-69	6.40576e-65
TCONS_00002918	ARHGEF11	-2.49584	0.573511	1061.36	2.18131e-69	6.54241e-65
TCONS_00008038_add	WASH7P	-0.691732	0.638074	536.461	2.57451e-69	7.72148e-65
TCONS_00003971	IFIT3	-0.844368	1.08357	302.796	2.62668e-69	7.87767e-65
TCONS_00029354	AHCYL2	-0.719663	-1.11782	454.171	2.68459e-69	8.05107e-65
TCONS_00013172	NMT1	-0.837327	0.457486	716.62	2.9158e-69	8.7442e-65
TCONS_00002384	YIPF1	-2.05214	1.07047	551.395	2.95892e-69	8.8732e-65
TCONS_00007923	STAT2	-1.95079	0.459659	986.45	6.02498e-69	1.80665e-64
TCONS_00007927	STAT2	1.95079	-0.459659	986.45	6.02498e-69	1.80665e-64
TCONS_00000533	XLOC_000182	-0.901452	0.779376	459.811	6.34402e-69	1.90219e-64
TCONS_00022702	QTRTD1	-0.977743	-1.40391	502.675	7.31081e-69	2.192e-64
TCONS_00132856_add	LOC100506746	-0.13157	-1.22108	303.141	7.33709e-69	2.19981e-64
TCONS_00011020	PEAK1	-1.09602	-0.891765	620.288	7.57227e-69	2.27024e-64
TCONS_00026880	BTN2A2	-1.29746	1.0336	380.62	8.75776e-69	2.62558e-64
TCONS_00010597	LOC100507217	-0.612078	0.77916	433.59	8.93749e-69	2.67937e-64
TCONS_00029016	EIF4H	-1.39817	-0.606082	844.318	1.07825e-68	3.23238e-64
TCONS_00014918	NFATC1	-0.00116632	-0.63498	528.908	1.44949e-68	4.34515e-64
TCONS_00012442	MLKL	-1.46471	-1.30812	674.901	1.49507e-68	4.48161e-64
TCONS_00024451	C4orf32	1.14468	1.13155	575.106	1.55349e-68	4.65659e-64
TCONS_00024507	IL15	-0.0875337	0.624145	529.924	2.40926e-68	7.22129e-64
TCONS_00006618	TMPRSS13	-2.02831	-1.11897	906.581	2.57041e-68	7.70404e-64
TCONS_00002351	EFCAB14	-1.83375	0.966967	537.803	2.78341e-68	8.34215e-64
TCONS_00031275	ZHX1-C8ORF76	-0.211118	0.485707	639.692	2.86982e-68	8.60084e-64
TCONS_00019506	SESTD1	-0.0755606	1.08865	306.989	3.16498e-68	9.48512e-64
TCONS_00018935	SRSF7	-1.22914	0.545442	691.579	4.19427e-68	1.25694e-63
TCONS_00024590	RAPGEF2	-1.48721	-1.04815	706.106	5.52511e-68	1.65571e-63
TCONS_00003091	IVNS1ABP	-2.56503	0.627177	1030.02	5.79202e-68	1.73564e-63
TCONS_00018790	PUM2	-3.39982	1.44541	923.377	6.11974e-68	1.83378e-63
TCONS_00082950_add	ZNF69	-2.21177	1.22926	523.685	6.95209e-68	2.08312e-63
TCONS_00016678	AKAP8L	-2.52211	0.829153	851.141	7.22663e-68	2.16531e-63
TCONS_00024882	HNRPDL	-1.35348	0.704323	583.751	8.58465e-68	2.57205e-63
TCONS_00002732	PI4KB	-1.18706	-1.3403	570.422	9.07486e-68	2.71883e-63
TCONS_00015454	CD97	-1.1973	0.903189	424.99	9.31224e-68	2.78985e-63
TCONS_00016858	PAF1	2.37323	-0.967895	706.739	1.14065e-67	3.41715e-63
TCONS_00032135	IFNA14	-0.565475	-1.75295	452.973	1.53152e-67	4.58783e-63
TCONS_00016636	STX10	-0.360539	1.68914	180.837	2.23068e-67	6.682e-63
TCONS_00009254	FBXO34	1.94241	-0.701972	743.121	2.23739e-67	6.70189e-63
TCONS_00170415_add	CDKN2B-AS1	-0.36271	-1.71849	356.206	2.73359e-67	8.18793e-63
TCONS_00025801	MATR3	-2.00417	0.748686	725.905	3.346e-67	1.00216e-62
TCONS_00033646	RBMX	-2.57795	0.582707	1073.3	3.71177e-67	1.11168e-62
TCONS_00026111	AK056817	0.931885	0.772364	610.879	4.30654e-67	1.28972e-62
TCONS_00010386	PIAS1	-2.20889	0.630399	891.062	4.67913e-67	1.40126e-62
TCONS_00014920	NFATC1	-0.476204	1.03118	299.527	5.07227e-67	1.51889e-62
TCONS_00017840	ARID5A	1.31245	-0.687928	582.704	7.01336e-67	2.10001e-62
TCONS_00002161	SRSF4	1.59398	0.947747	762.39	8.83344e-67	2.64491e-62
TCONS_00023315	ZDHHC3	-0.39405	0.454429	666.589	1.03145e-66	3.08815e-62
TCONS_00002631	ZNF697	0.951662	1.46376	494.05	1.05351e-66	3.1541e-62
TCONS_00005240	VPS51	0.71501	1.55471	428.04	1.26254e-66	3.77978e-62
TCONS_00033339	SLC6A8	0.858826	1.50996	468.926	1.2798e-66	3.83134e-62
TCONS_00000137	PRDM2	-1.67978	0.637544	713.726	1.30857e-66	3.91734e-62
TCONS_00051485_add	LOC100506499	0.215948	-1.53181	199.245	1.7519e-66	5.24413e-62
TCONS_00136018_add	LOC153684	-2.18471	0.862359	701.768	1.97146e-66	5.90097e-62
TCONS_00166459_add	PSD3	-0.570667	0.771188	424.646	2.15889e-66	6.46178e-62
TCONS_00010037	WARS	-2.94677	0.839888	1002.56	2.35701e-66	7.05384e-62
TCONS_00008833	ELF1	2.48094	-0.375859	1275.56	2.36472e-66	7.07667e-62
TCONS_00008840	ELF1	-2.48094	0.375859	1275.56	2.36472e-66	7.07667e-62
TCONS_00021689	BID	-1.95094	-0.859783	920.988	2.94936e-66	8.82566e-62
TCONS_00032694	SETX	-1.04014	-0.500453	798.462	3.45658e-66	1.03431e-61
TCONS_00027715	XLOC_008665	-0.46631	-1.82352	477.765	3.46223e-66	1.03597e-61
TCONS_00013171	NMT1	0.834108	-0.49538	661.379	3.82347e-66	1.14402e-61
TCONS_00030449	SORBS3	-0.849647	-1.22009	460.063	4.05648e-66	1.2137e-61
TCONS_00013562	HEXDC	-0.613192	-1.33798	381.483	4.80687e-66	1.43817e-61
TCONS_00011946	BANP	-1.24915	-1.53309	627.781	5.44241e-66	1.62826e-61
TCONS_00002124	C1orf63	-0.537712	-0.696057	551.085	5.47223e-66	1.63713e-61
TCONS_00009180	RNF31	0.880491	-0.400682	773.144	5.59186e-66	1.67286e-61
TCONS_00028559	RNASET2	-1.913	-1.4688	889.399	6.35743e-66	1.90183e-61
TCONS_00028560	RNASET2	1.913	1.4688	889.399	6.35743e-66	1.90183e-61
TCONS_00027960	NELFE	0.581677	-0.872899	366.758	6.40298e-66	1.91532e-61
TCONS_00007297	TMPO	-0.336617	0.459307	655.391	7.16423e-66	2.14289e-61
TCONS_00025833	ANKHD1-EIF4EBP3	-2.94135	0.880803	969.756	7.71878e-66	2.30869e-61
TCONS_00002705	ENSA	-0.933625	-0.478613	787.191	7.74019e-66	2.31501e-61
TCONS_00002706	ENSA	0.933625	0.478613	787.191	7.74019e-66	2.31501e-61
TCONS_00012433	GLG1	-1.8897	0.507911	897.052	8.08414e-66	2.41772e-61
TCONS_00029787	GRB10	-1.84176	-1.24084	814.006	1.19932e-65	3.58669e-61
TCONS_00024480	KIAA1109	-0.639814	-1.00897	444.017	1.29408e-65	3.86996e-61
TCONS_00024987	CAMK2D	-1.46389	-0.551481	885.426	1.62576e-65	4.8615e-61
TCONS_00023001	TTC14	1.16498	-0.782357	480.708	1.69484e-65	5.06792e-61
TCONS_00023000	TTC14	-1.17058	0.747507	504.602	1.92265e-65	5.74892e-61
TCONS_00027107	CFB	-0.502231	-1.49495	349.446	2.13666e-65	6.38861e-61
TCONS_00011544	TMEM219	-0.832541	-0.33575	911.048	2.68336e-65	8.02299e-61
TCONS_00028229	NFKBIE	1.48108	-1.1535	346.99	2.77466e-65	8.29566e-61
TCONS_00019895	RIN2	-0.0661927	-1.24328	272.032	3.11029e-65	9.29852e-61
TCONS_00032545	PHF19	-0.217583	0.872324	365.319	3.22727e-65	9.64794e-61
TCONS_00008234	CAMKK2	-2.1767	-1.16553	952.662	3.89094e-65	1.16316e-60
TCONS_00026893	BTN2A1	-0.632483	0.871111	366.002	3.97881e-65	1.18939e-60
TCONS_00004879	AMPD3	0.371348	-1.51942	177.272	5.59795e-65	1.67328e-60
TCONS_00005583	PIWIL4	0.526033	0.919532	443.105	7.18802e-65	2.1485e-60
TCONS_00030059	NAMPT	-0.0628042	0.374992	745.295	7.4743e-65	2.23392e-60
TCONS_00030060	NAMPT	0.0628042	-0.374992	745.295	7.4743e-65	2.23392e-60
TCONS_00018431	CASP8	-2.29879	0.739532	821.055	8.78418e-65	2.62524e-60
TCONS_00013299	LUC7L3	-1.44081	1.00428	404.067	9.58808e-65	2.8654e-60
TCONS_00004121	SEC23IP	-2.8562	0.990974	861.683	9.74853e-65	2.91325e-60
TCONS_00033647	RBMX	0.501624	-0.58656	540.445	1.10864e-64	3.31296e-60
TCONS_00031802	STX17	-1.32482	0.419666	832.091	1.22566e-64	3.66251e-60
TCONS_00031803	STX17	1.32482	-0.419666	832.091	1.22566e-64	3.66251e-60
TCONS_00002260	STK40	0.042423	0.687523	478.754	1.30656e-64	3.90401e-60
TCONS_00017816	KDM3A	-0.966451	-0.801859	594.769	2.00027e-64	5.97662e-60
TCONS_00010704	GOLGA8B	-2.44388	1.60507	519.399	2.17126e-64	6.4873e-60
TCONS_00026370	FAM13B	-1.6639	-0.846865	805.93	3.00184e-64	8.9683e-60
TCONS_00007900	MMP19	-2.0795	-0.592924	1077.95	3.20271e-64	9.5681e-60
TCONS_00028226	NFKBIE	-1.48796	1.12224	356.162	4.25154e-64	1.27011e-59
TCONS_00014836	RNF138	-2.68581	0.739913	962.37	4.2579e-64	1.27196e-59
TCONS_00014837	RNF138	2.68581	-0.739913	962.37	4.2579e-64	1.27196e-59
TCONS_00019230	NEURL3	-1.77778	1.60827	287.719	4.50576e-64	1.34591e-59
TCONS_00028222	MRPL14	1.3726	1.09873	638.952	5.3276e-64	1.59135e-59
TCONS_00014828	LAMA3	0.346852	1.83892	459.008	6.744e-64	2.01436e-59
TCONS_00020129	DDX27	-1.45626	1.67102	206.523	1.24363e-63	3.71436e-59
TCONS_00025835	IK	0.368784	-0.694635	452.388	1.55197e-63	4.63512e-59
TCONS_00010499	IL16	-0.17897	-1.77429	327.163	1.55389e-63	4.64068e-59
TCONS_00096782_add	ZEB2-AS1	0.181645	-0.651992	482.78	1.64453e-63	4.91123e-59
TCONS_00003973	IFIT3	-0.0051991	-0.964861	334.238	2.65191e-63	7.91913e-59
TCONS_00030930	TNFRSF10A	-0.506069	0.67887	465.022	2.81716e-63	8.41233e-59
TCONS_00002915	ARHGEF11	-2.67021	0.472054	1209.31	3.01024e-63	8.98859e-59
TCONS_00023823	RAB43	1.52661	-1.30709	291.5	3.02312e-63	9.02674e-59
TCONS_00079642_add	GREB1L	-1.16353	-1.54084	601.7	3.14603e-63	9.39342e-59
TCONS_00021666	SELO	-2.11141	0.467906	1003.18	3.44312e-63	1.02801e-58
TCONS_00018968	ASB3	-0.88383	1.26074	215.308	3.83658e-63	1.14545e-58
TCONS_00020133	ZFAS1	2.63779	-1.05013	737.237	4.25332e-63	1.26979e-58
TCONS_00020692	RBM39	-1.71036	0.960761	483.118	4.50607e-63	1.34515e-58
TCONS_00016680	AKAP8L	-0.961975	0.924223	356.494	4.67081e-63	1.39428e-58
TCONS_00006877	AEBP2	-1.36946	-0.890391	681.266	5.50657e-63	1.64366e-58
TCONS_00004928	HTATIP2	-0.838418	0.823022	396.818	6.93295e-63	2.06935e-58
TCONS_00030199	ZC3HAV1	-0.268842	-0.988045	360.675	6.94721e-63	2.07354e-58
TCONS_00000038	TNFRSF14	-2.22709	0.382522	1152.49	6.96366e-63	2.07837e-58
TCONS_00030724	XLOC_009627	-0.501289	-1.61103	370.012	8.17973e-63	2.44124e-58
TCONS_00029641	HNRNPA2B1	-3.34876	1.01654	1041.49	9.99035e-63	2.98142e-58
TCONS_00011516	QPRT	-1.44535	-1.20988	649.264	1.04527e-62	3.1193e-58
TCONS_00007616	IFFO1	-2.45323	1.32815	554.195	1.0672e-62	3.18462e-58
TCONS_00004943	PRRG4	-0.0709536	0.942433	331.986	1.25894e-62	3.75666e-58
TCONS_00031878	C9orf91	-2.46719	1.58606	532.819	1.53228e-62	4.57218e-58
TCONS_00013238	CDK5RAP3	-1.0383	0.542457	628.686	2.22106e-62	6.62697e-58
TCONS_00015376	DNM2	-2.80236	0.576668	1144.72	2.2679e-62	6.76651e-58
TCONS_00006607	FXYD6-FXYD2	-2.87802	1.14258	782.201	2.45442e-62	7.32275e-58
TCONS_00002866	ASH1L	0.771667	-1.22217	216.596	2.70375e-62	8.06638e-58
TCONS_00014004	SLFN12	-1.18259	0.760447	482.206	2.74358e-62	8.18493e-58
TCONS_00024813	ANKRD17	-1.41585	0.750236	536.413	4.2038e-62	1.25408e-57
TCONS_00010432	PML	-0.106267	-0.487799	620.235	4.62268e-62	1.37899e-57
TCONS_00007829	CSRNP2	-2.75916	0.946908	837.515	4.65514e-62	1.38863e-57
TCONS_00024576	RAPGEF2	-3.09741	1.40004	797.39	8.00402e-62	2.38744e-57
TCONS_00015847	GEMIN7	1.56826	-1.38872	271.114	8.55843e-62	2.55272e-57
TCONS_00006581	IL18	-1.90554	-1.36076	848.758	1.21963e-61	3.63756e-57
TCONS_00004607	SLC25A28	1.54967	-0.590026	694.742	1.2329e-61	3.67699e-57
TCONS_00018582	SGPP2	-0.544746	1.64567	146.567	1.40076e-61	4.17748e-57
TCONS_00019840	ATRN	-1.50601	-1.53041	762.557	1.48012e-61	4.41401e-57
TCONS_00030959	RAB11FIP1	-0.412359	-0.420077	717.563	1.60402e-61	4.78335e-57
TCONS_00008245	KDM2B	-2.26341	1.42641	461.371	1.72584e-61	5.14646e-57
TCONS_00002506	GBP2	0.562833	-0.40309	708.307	1.81517e-61	5.41264e-57
TCONS_00027697	QKI	-0.937648	-0.292625	975.271	1.98235e-61	5.91098e-57
TCONS_00029250	ZNF277	1.22284	1.30887	563.63	2.18879e-61	6.52632e-57
TCONS_00023701	CCDC80	-0.0528231	-1.43636	228.745	2.44396e-61	7.28692e-57
TCONS_00029918	CDK6	1.80022	1.20972	783.048	2.58283e-61	7.7007e-57
TCONS_00026371	FAM13B	-1.21042	-1.08955	572.503	2.5942e-61	7.73436e-57
TCONS_00000861	HIST2H4A	-1.35636	-0.809216	696.206	2.83045e-61	8.43843e-57
TCONS_00005980	HPS5	-2.49602	1.08842	657.448	2.87232e-61	8.56268e-57
TCONS_00020811	ZNF217	-1.87765	0.801325	619.386	3.20591e-61	9.55682e-57
TCONS_00021837	APOL3	-2.71567	0.650479	1034.22	3.91058e-61	1.1657e-56
TCONS_00023781	HSPBAP1	0.845353	1.63708	538.398	4.30258e-61	1.28251e-56
TCONS_00024517	ABCE1	2.13132	-0.76228	727.38	4.52341e-61	1.34829e-56
TCONS_00031199	UBR5	0.432683	0.729957	488.26	4.77502e-61	1.42324e-56
TCONS_00009712	AP1G2	-2.64275	0.722026	944.543	5.02186e-61	1.49677e-56
TCONS_00031751	TDRD7	2.04307	1.17645	881.965	5.12282e-61	1.5268e-56
TCONS_00031753	TDRD7	-2.04307	-1.17645	881.965	5.12282e-61	1.5268e-56
TCONS_00008691	UBAC2	0.112138	0.737065	438.332	5.17662e-61	1.54274e-56
TCONS_00024807	GRSF1	-0.348724	-1.09211	335.263	6.62472e-61	1.97423e-56
TCONS_00022477	RBM5	2.77856	-0.864251	892.248	7.34823e-61	2.18977e-56
TCONS_00000297	PHACTR4	-2.91928	0.89832	925.567	8.82195e-61	2.62885e-56
TCONS_00007595	KDM5A	-0.543756	-0.581113	596.932	1.03757e-60	3.09175e-56
TCONS_00007596	KDM5A	0.543756	0.581113	596.932	1.03757e-60	3.09175e-56
TCONS_00021670	SELO	-0.869739	-0.573518	672.608	1.06945e-60	3.18655e-56
TCONS_00022535	STAB1	-1.8367	0.53109	829.637	1.19436e-60	3.55859e-56
TCONS_00004178	LARP4B	-0.22626	0.899366	329.108	1.3304e-60	3.9638e-56
TCONS_00019229	NEURL3	0.818451	-1.52966	144.136	1.58854e-60	4.73258e-56
TCONS_00032309	AK057188	-1.67688	0.636258	682.89	1.88989e-60	5.63017e-56
TCONS_00002257	STK40	-0.583185	-0.609996	582.993	2.36424e-60	7.04283e-56
TCONS_00030425	NAT1	-1.8009	-1.06278	788.975	2.68476e-60	7.9971e-56
TCONS_00012571	DPH1	-1.05965	0.980384	326.839	3.22898e-60	9.61783e-56
TCONS_00018020	DBI	-0.895697	0.373678	780.07	4.37691e-60	1.30366e-55
TCONS_00000953	TNFAIP8L2-SCNM1	0.356599	0.787887	441.088	4.50471e-60	1.34168e-55
TCONS_00008338	NCOR2	-0.920629	0.567961	574.385	4.52031e-60	1.34628e-55
TCONS_00002622	TRIM33	0.497275	-0.652393	466.357	4.67961e-60	1.39368e-55
TCONS_00160271_add	POLR2J2	-1.68779	-1.19824	733.616	5.25228e-60	1.56418e-55
TCONS_00170403_add	CDKN2B-AS1	-0.158526	1.09603	256.939	5.40329e-60	1.6091e-55
TCONS_00027961	NELFE	-0.580055	0.832456	356.097	1.12428e-59	3.348e-55
TCONS_00007295	TMPO	-0.712657	-0.314247	886.136	1.16685e-59	3.47463e-55
TCONS_00008536	NHLRC3	-1.76674	0.56455	769.215	1.47671e-59	4.3972e-55
TCONS_00003986	PCGF5	-2.393	0.531098	1016.43	1.57715e-59	4.69612e-55
TCONS_00023421	UBA7	-2.12505	0.736778	736.262	1.7536e-59	5.22136e-55
TCONS_00022896	TSC22D2	-0.920745	-0.797135	558.99	1.80516e-59	5.37468e-55
TCONS_00026185	NAIP	-1.24411	-0.943881	606.321	1.97701e-59	5.88616e-55
TCONS_00030660	RIPK2	2.98163	-0.917511	932.158	2.01586e-59	6.00163e-55
TCONS_00165014_add	SPAG1	-1.66945	0.867921	508.063	2.01728e-59	6.00566e-55
TCONS_00006922	KIAA1551	-1.18253	-0.881086	604.574	2.45613e-59	7.31191e-55
TCONS_00027492	DSE	0.0599133	-0.417833	666.441	2.56379e-59	7.63188e-55
TCONS_00006382	C11orf24	-1.7045	-1.08165	744.605	2.71002e-59	8.06663e-55
TCONS_00029977	ZNF394	-2.14296	0.521909	933.258	3.63756e-59	1.08265e-54
TCONS_00015853	FOSB	0.0715546	-1.89448	364.363	4.07352e-59	1.21236e-54
TCONS_00031806	MSANTD3	-1.39934	1.74767	192.11	4.15647e-59	1.23701e-54
TCONS_00027875	FLOT1	-2.61703	1.64507	666.678	6.2791e-59	1.86866e-54
TCONS_00027876	FLOT1	2.61703	-1.64507	666.678	6.2791e-59	1.86866e-54
TCONS_00019563	SF3B1	-1.71301	-0.701114	854.529	6.49422e-59	1.93255e-54
TCONS_00001357	RCSD1	1.78968	1.32214	787.256	7.38507e-59	2.19758e-54
TCONS_00018892_add	AGAP9	-1.33219	-1.19675	593.908	7.80789e-59	2.32332e-54
TCONS_00002916	ARHGEF11	-2.16059	-0.458849	1175.66	7.99936e-59	2.38021e-54
TCONS_00007653	CLEC4E	-0.911535	-1.11163	461.864	1.02799e-58	3.05857e-54
TCONS_00002690	APH1A	-1.05535	-0.329254	938.313	1.07769e-58	3.20633e-54
TCONS_00006494	CTSC	1.77757	-0.415548	932.54	1.08311e-58	3.22235e-54
TCONS_00006495	CTSC	-1.77757	0.415548	932.54	1.08311e-58	3.22235e-54
TCONS_00002514	GBP2	-0.563862	0.363807	743.073	1.23471e-58	3.67313e-54
TCONS_00015846	GEMIN7	-1.5774	1.32735	277.837	1.23786e-58	3.68239e-54
TCONS_00017665	XLOC_005595	-0.635668	-1.49818	382.836	1.59519e-58	4.74506e-54
TCONS_00026198	COL4A3BP	0.397066	0.762435	452.015	1.65957e-58	4.9364e-54
TCONS_00026199	COL4A3BP	-0.397066	-0.762435	452.015	1.65957e-58	4.9364e-54
TCONS_00011706	CYLD	-1.39342	-0.896486	664.996	2.03091e-58	6.04055e-54
TCONS_00029388	LUC7L2	-2.04241	-0.89577	909.27	2.22425e-58	6.61536e-54
TCONS_00025979	HRH2	0.45466	0.747697	468.905	2.2733e-58	6.76103e-54
TCONS_00024632	GAK	-2.40633	1.06414	623.733	3.14286e-58	9.34687e-54
TCONS_00006620	TMPRSS13	-1.97434	1.33109	380.112	4.05943e-58	1.20719e-53
TCONS_00011089	C15orf38-AP3S2	-1.24825	-1.10461	568.709	4.71035e-58	1.40072e-53
TCONS_00011090	C15orf38-AP3S2	1.24825	1.10461	568.709	4.71035e-58	1.40072e-53
TCONS_00002339	MKNK1	-1.13371	0.48751	677.355	6.32192e-58	1.87982e-53
TCONS_00021511	MAFF	1.76852	-1.64711	284.117	6.80357e-58	2.02297e-53
TCONS_00014533	EXOC7	-0.226264	-0.603429	516.707	9.8206e-58	2.91996e-53
TCONS_00005363_add	SLC25A44	-0.863143	-1.57373	520.084	1.14656e-57	3.40894e-53
TCONS_00023504	TMEM110-MUSTN1	-0.31097	-0.616169	518.54	1.18844e-57	3.53322e-53
TCONS_00031884	TLR4	-2.37856	1.05076	617.661	1.33332e-57	3.96383e-53
TCONS_00029520	GALNT11	-1.40935	-1.04201	632.62	1.3403e-57	3.98446e-53
TCONS_00010601	CHD2	-3.06171	1.00744	903.774	1.39443e-57	4.14523e-53
TCONS_00024185	PI4K2B	-1.61195	-1.2129	696.217	1.42388e-57	4.23262e-53
TCONS_00011745	NLRC5	-1.47078	0.579031	662.528	1.49133e-57	4.43298e-53
TCONS_00018432	CASP8	-2.62653	0.977301	747.242	1.72689e-57	5.13284e-53
TCONS_00014587	CANT1	-1.2755	-1.09853	576.307	1.86305e-57	5.53735e-53
TCONS_00023998	BCL6	0.155522	0.825055	379.273	2.53175e-57	7.5241e-53
TCONS_00011371	NOMO3	-0.163096	-1.77846	378.745	2.59683e-57	7.71725e-53
TCONS_00026375	FAM13B	-2.3784	1.14019	575.28	2.62904e-57	7.81271e-53
TCONS_00011086	RHCG	-0.615513	-1.66246	490.238	2.70368e-57	8.03425e-53
TCONS_00027498	FAM26F	-2.14407	-0.688749	1017.97	2.76326e-57	8.21104e-53
TCONS_00004570	PIK3AP1	-0.917009	0.958712	303.97	3.54069e-57	1.05204e-52
TCONS_00004573	PIK3AP1	0.917009	-0.958712	303.97	3.54069e-57	1.05204e-52
TCONS_00022422	DHX30	0.0766457	-0.695189	425.696	4.20369e-57	1.24896e-52
TCONS_00005626	ZC3H12C	1.08741	-1.27304	202.084	5.1642e-57	1.53428e-52
TCONS_00024631	GAK	0.202854	-0.551974	522.64	5.17034e-57	1.53605e-52
TCONS_00031114	TPD52	-2.08184	-1.26784	898.555	5.38126e-57	1.59867e-52
TCONS_00029548	DNAJB6	-2.24823	0.966384	614.161	5.39135e-57	1.60161e-52
TCONS_00031486	KANK1	-0.912072	-1.53066	514.04	7.38819e-57	2.19466e-52
TCONS_00014078	JUP	-1.53937	-0.504757	898.746	8.38206e-57	2.48981e-52
TCONS_00008263	ZCCHC8	0.784378	0.709768	549.797	9.41373e-57	2.79616e-52
TCONS_00021366	ASPHD2	-1.35838	-1.43829	653.568	9.86746e-57	2.93083e-52
TCONS_00024903	SEC31A	-1.38316	-0.500614	849.189	1.42884e-56	4.24365e-52
TCONS_00018189	GCA	-0.0931336	0.688902	425.319	1.6605e-56	4.93136e-52
TCONS_00004880	AMPD3	-0.363688	1.42883	153.907	1.71798e-56	5.10189e-52
TCONS_00000789	SRGAP2D	-0.473031	-1.19602	320.194	1.96149e-56	5.82464e-52
TCONS_00003319	ARID4B	2.77688	-0.925722	830.326	2.20961e-56	6.56122e-52
TCONS_00003322	ARID4B	-2.77688	0.925722	830.326	2.20961e-56	6.56122e-52
TCONS_00025171	DDX60L	-2.35356	-0.442326	1253.89	2.2453e-56	6.66673e-52
TCONS_00009235	PTGER2	-2.03513	0.41482	1005.59	2.28861e-56	6.79513e-52
TCONS_00007289	NEDD1	-3.38313	1.33154	933.356	2.37658e-56	7.05606e-52
TCONS_00023700	CCDC80	0.0521437	1.38731	212.536	2.57673e-56	7.65004e-52
TCONS_00016949	RTN2	-1.74381	1.48705	279.719	2.70635e-56	8.0346e-52
TCONS_00008850	EPSTI1	-1.81786	0.33559	1045.03	2.70711e-56	8.03659e-52
TCONS_00009215	KIAA0391	-1.27266	-0.417988	885.217	2.88658e-56	8.56911e-52
TCONS_00027668	WTAP	-3.60088	1.22689	1041.52	3.43028e-56	1.01828e-51
TCONS_00005982	HPS5	-2.56789	0.772546	851.203	4.10133e-56	1.21744e-51
TCONS_00009722	TM9SF1	-1.4476	-0.305596	1068.48	5.07822e-56	1.50737e-51
TCONS_00001727_add	AGO3	-1.24712	0.558057	619.261	9.67698e-56	2.87232e-51
TCONS_00003827	SLC29A3	-1.47628	-0.696269	753.937	1.99043e-55	5.90721e-51
TCONS_00031810	MSANTD3	0.0509387	-1.70138	242.852	2.02775e-55	6.01776e-51
TCONS_00011747	NLRC5	-0.63998	0.532883	546.608	2.11095e-55	6.26445e-51
TCONS_00021512	MAFF	-1.77562	1.59178	286.799	2.22289e-55	6.59642e-51
TCONS_00010160	CYFIP1	-0.396964	0.834463	327.582	2.51847e-55	7.47279e-51
TCONS_00018290	NABP1	-1.10907	0.573217	574.52	3.51837e-55	1.0439e-50
TCONS_00032989	ZFX	-1.21118	0.832189	403.992	3.65351e-55	1.08396e-50
TCONS_00028521	IPCEF1	-1.23683	-1.20826	546.238	3.91578e-55	1.16173e-50
TCONS_00025836	IK	-0.36767	0.653757	434.614	4.1235e-55	1.22328e-50
TCONS_00028911	IKZF1	-0.907491	-0.479711	722.856	4.18982e-55	1.24291e-50
TCONS_00003514	PFKFB3	0.384256	-0.856254	314.657	5.6483e-55	1.67551e-50
TCONS_00001899	SLC35E2B	-1.10825	-0.921474	546.134	6.01122e-55	1.78311e-50
TCONS_00019080	TIA1	-2.03647	0.422661	987.801	6.45251e-55	1.91388e-50
TCONS_00178607_add	ASMTL-AS1	0.645551	-0.724239	397.567	6.82218e-55	2.02346e-50
TCONS_00025831	ANKHD1-EIF4EBP3	-1.37751	-0.638992	746.876	8.19029e-55	2.42916e-50
TCONS_00000140	PRDM2	1.65664	-0.66438	623.326	8.19793e-55	2.43134e-50
TCONS_00001375	TBX19	-1.65053	-0.331682	1093.92	8.2549e-55	2.44816e-50
TCONS_00008943	MYCBP2	-0.880642	0.636622	482.788	9.40896e-55	2.79013e-50
TCONS_00025765	SLC25A48	-0.66978	-0.925274	421.838	9.90152e-55	2.9361e-50
TCONS_00030925	TNFRSF10B	-2.19465	0.715895	750.709	1.03092e-54	3.05688e-50
TCONS_00024492	CCRN4L	-2.26537	1.62501	514.834	1.07377e-54	3.18384e-50
TCONS_00027749	PXDC1	-1.35267	-0.731669	691.832	1.15804e-54	3.43358e-50
TCONS_00012190	ARHGAP17	-0.558382	-0.760737	460.809	2.10353e-54	6.23634e-50
TCONS_00026163	TAF9	-1.65785	-0.281604	1163.12	2.20369e-54	6.53306e-50
TCONS_00008365	NCOR2	-0.207942	-0.46853	604.986	2.54058e-54	7.53156e-50
TCONS_00030787	GSDMD	0.252534	-0.9112	288.311	3.02278e-54	8.95982e-50
TCONS_00007288	NEDD1	0.360261	-0.616383	456.288	3.27306e-54	9.70136e-50
TCONS_00021519	GTPBP1	-2.09081	1.3304	406.819	3.67043e-54	1.08788e-49
TCONS_00026342	ZCCHC10	-0.28154	-0.589639	512.893	4.30772e-54	1.27668e-49
TCONS_00019849	PANK2	-2.27243	0.462454	1018.2	4.50312e-54	1.33454e-49
TCONS_00022960	SMC4	-2.49346	0.967394	686.115	5.41824e-54	1.6057e-49
TCONS_00029492	NUB1	-0.658819	-0.584553	579.689	6.69535e-54	1.9841e-49
TCONS_00029504	NUB1	0.658819	0.584553	579.689	6.69535e-54	1.9841e-49
TCONS_00027478	GTF3C6	0.808909	-0.595866	501.261	6.98819e-54	2.07067e-49
TCONS_00095864_add	MIR5696	-1.12921	1.46741	151.553	7.67649e-54	2.27454e-49
TCONS_00031582	NFX1	0.337861	-0.363488	701.763	7.91863e-54	2.34621e-49
TCONS_00132555_add	BC016361	-2.38377	0.749283	787.485	8.00521e-54	2.37178e-49
TCONS_00027523	NCOA7	-3.77318	1.05714	1169.93	8.60116e-54	2.54818e-49
TCONS_00022157	CHKB-CPT1B	-1.14713	-0.576514	706.605	1.15051e-53	3.40805e-49
TCONS_00014016	CCL15-CCL14	-0.54938	-1.51679	366.908	1.18399e-53	3.50711e-49
TCONS_00013252	SNX11	-0.219213	0.860774	309.291	1.21131e-53	3.58791e-49
TCONS_00032343	FRMD3	0.486969	1.10532	325.467	1.34453e-53	3.98236e-49
TCONS_00005633	DLAT	0.206334	-0.817061	330.802	1.46437e-53	4.33702e-49
TCONS_00008173	NAA25	-0.568927	-0.590876	555.037	1.71134e-53	5.06795e-49
TCONS_00065184_add	AK126539	-2.72266	1.45846	672.208	1.84024e-53	5.4495e-49
TCONS_00023450	RASSF1	-1.24337	0.717125	475.939	1.95915e-53	5.80144e-49
TCONS_00015842	CLASRP	-0.857873	-0.854432	487.037	2.01653e-53	5.97113e-49
TCONS_00026696	MGAT1	-1.58282	-0.859175	716.642	2.65621e-53	7.86503e-49
TCONS_00018644	GIGYF2	0.111438	-0.959704	271.939	2.82681e-53	8.36989e-49
TCONS_00002621	TRIM33	-0.496593	0.612515	457.815	3.09311e-53	9.15807e-49
TCONS_00011369	NOMO3	0.133556	1.72238	360.55	3.97449e-53	1.17665e-48
TCONS_00022961	SMC4	1.88654	-0.964061	480.405	4.00843e-53	1.18666e-48
TCONS_00029841	RFC2	-3.28207	1.13857	920.262	4.53081e-53	1.34126e-48
TCONS_00014277	LRRC59	-2.65647	1.30148	622.162	4.73672e-53	1.40216e-48
TCONS_00019702	ILKAP	-1.17214	-1.09438	521.723	4.80857e-53	1.42338e-48
TCONS_00008945	MYCBP2	-2.62188	-1.01771	1107.44	4.96525e-53	1.46971e-48
TCONS_00008946	MYCBP2	-2.62188	-1.01771	1107.44	4.96525e-53	1.46971e-48
TCONS_00027788	ATXN1	-0.494502	-0.51561	594.868	5.34672e-53	1.58252e-48
TCONS_00032402	NOL8	-1.03088	-0.608297	649.526	5.43971e-53	1.60999e-48
TCONS_00014435	DDX5	0.585016	-0.475507	582.564	6.58255e-53	1.94817e-48
TCONS_00028545	TAGAP	1.90882	-1.09022	424.253	7.16668e-53	2.12098e-48
TCONS_00012382	CENPT	-0.928493	-0.501403	696.849	8.2698e-53	2.44736e-48
TCONS_00002350	EFCAB14	1.05739	-0.651811	486.36	8.70052e-53	2.57475e-48
TCONS_00018021	DBI	0.890875	-0.411244	690.15	1.00289e-52	2.96765e-48
TCONS_00026251	MCTP1	-1.23307	-0.464658	810.019	1.143e-52	3.38215e-48
TCONS_00004425	SGMS1	-3.29463	0.685675	1198.13	1.29428e-52	3.82964e-48
TCONS_00002358	DMRTA2	-1.26005	-1.43146	631.474	1.68996e-52	5.00025e-48
TCONS_00002588	KCNA3	-1.88993	-0.939817	808.538	1.79498e-52	5.31081e-48
TCONS_00015046	MBD1	-2.2203	1.01052	558.566	2.04787e-52	6.05882e-48
TCONS_00016366	TCF3	0.287924	-0.558616	490.187	2.16575e-52	6.40716e-48
TCONS_00012341	CSNK2A2	0.645699	-0.379376	695.12	2.31822e-52	6.85799e-48
TCONS_00015721	IFNL2	-0.365838	-1.60534	360.718	2.41302e-52	7.13819e-48
TCONS_00012342	CSNK2A2	-0.647608	0.340341	748.327	2.45484e-52	7.26166e-48
TCONS_00012737	ELP5	-0.798978	1.23583	164.931	2.72746e-52	8.06783e-48
TCONS_00017636	MSH6	-1.06265	-1.27712	480.637	2.84578e-52	8.41754e-48
TCONS_00020244	C20orf96	0.928309	-1.02511	248.399	2.9179e-52	8.63055e-48
TCONS_00020126	ARFGEF2	-1.24969	-1.25153	546.094	4.03022e-52	1.19186e-47
TCONS_00006737	WNT5B	-2.98504	1.16122	784.793	4.27351e-52	1.26376e-47
TCONS_00157481_add	WDR60	-0.883422	-1.26368	416.302	5.27793e-52	1.56074e-47
TCONS_00025403	PTGER4	-0.343067	0.446306	593.574	5.52015e-52	1.63225e-47
TCONS_00013869	DL490867	-1.81243	-1.34251	824.399	5.92076e-52	1.75065e-47
TCONS_00020778	STAU1	-1.88831	-0.444008	1044	7.95696e-52	2.35264e-47
TCONS_00025848	ZMAT2	-1.29772	-1.13135	557.432	8.12327e-52	2.40173e-47
TCONS_00178760_add	OFD1	-2.04656	-1.21837	867.683	8.72769e-52	2.58034e-47
TCONS_00030186	C7orf49	-1.63459	0.853073	466.74	9.34245e-52	2.762e-47
TCONS_00002404	TM2D1	-1.66998	-0.764486	772.502	1.00272e-51	2.96435e-47
TCONS_00029421	GSTK1	-2.06908	0.500034	888.97	1.12752e-51	3.33317e-47
TCONS_00000154	PLEKHM2	-0.312812	-0.411598	658.336	1.15968e-51	3.42812e-47
TCONS_00000158	PLEKHM2	0.312812	0.411598	658.336	1.15968e-51	3.42812e-47
TCONS_00016719	SUGP2	-1.09609	0.440514	685.735	1.16066e-51	3.43078e-47
TCONS_00006892	FGFR1OP2	-0.512028	-0.502982	600.294	1.19335e-51	3.5273e-47
TCONS_00010159	CYFIP1	-0.26804	-0.794404	376.912	1.33979e-51	3.96002e-47
TCONS_00027556	TNFAIP3	-0.379067	-0.950419	333.197	1.40501e-51	4.15265e-47
TCONS_00005628	ZC3H12C	-1.0836	1.19969	197.606	1.44207e-51	4.26203e-47
TCONS_00027361	FBXO9	-1.99269	0.547249	813.017	1.49492e-51	4.41809e-47
TCONS_00032105	PLGRKT	-0.0403499	0.5932	464.713	1.54741e-51	4.57306e-47
TCONS_00003998	BTAF1	-0.969873	0.614651	493.033	2.51018e-51	7.41782e-47
TCONS_00003999	BTAF1	0.969873	-0.614651	493.033	2.51018e-51	7.41782e-47
TCONS_00009777	BAZ1A	-1.46591	-0.271071	1098.2	2.70001e-51	7.97825e-47
TCONS_00027475	GTF3C6	-0.810938	0.558175	518.161	2.95984e-51	8.74573e-47
TCONS_00032103	PLGRKT	-0.531879	-0.625718	511.604	3.31908e-51	9.80688e-47
TCONS_00017537	SLC4A1AP	0.170313	0.740393	387.869	4.30695e-51	1.27249e-46
TCONS_00011938	XLOC_003833	1.37461	1.4066	678.89	4.47452e-51	1.32195e-46
TCONS_00019417	RBMS1	-1.00694	-0.48036	723.64	5.04483e-51	1.49029e-46
TCONS_00032159	MIR31HG	-1.07122	-1.35616	505.274	5.28323e-51	1.56067e-46
TCONS_00029595	TNRC18	-0.991945	-0.398646	796.32	5.85304e-51	1.72893e-46
TCONS_00015328	C19orf66	-2.74973	0.886248	816.331	6.29065e-51	1.85801e-46
TCONS_00033045	MAOA	-1.74787	-0.296592	1151.6	6.8536e-51	2.02421e-46
TCONS_00012188	ARHGAP17	-1.94617	1.24189	372.505	7.61587e-51	2.24927e-46
TCONS_00017560	YPEL5	-1.86466	-0.3845	1085.56	9.67861e-51	2.85819e-46
TCONS_00020801	ADNP	-1.37606	-1.0489	587.383	1.21638e-50	3.59186e-46
TCONS_00012231	NPIPL1	0.0226989	1.05092	239.977	1.27684e-50	3.77027e-46
TCONS_00031894	TLR4	-1.0381	-1.21389	461.808	1.34181e-50	3.96197e-46
TCONS_00008707	ARHGEF7	0.323912	0.655117	454.687	1.34884e-50	3.98258e-46
TCONS_00014035	TBC1D3G	-0.965573	-1.31831	451.313	1.82334e-50	5.38323e-46
TCONS_00026293	TMED7-TICAM2	-1.13961	-0.884627	542.332	1.98946e-50	5.87327e-46
TCONS_00014892	ZCCHC2	0.81652	-0.34244	755.933	2.01787e-50	5.95695e-46
TCONS_00011401	LYRM1	-1.54732	-0.993744	656.661	2.13307e-50	6.29681e-46
TCONS_00033569	MORF4L2	-2.50431	1.01651	646.376	3.15944e-50	9.32572e-46
TCONS_00014280	LRRC59	2.59029	-1.29093	596.91	3.26372e-50	9.63319e-46
TCONS_00006079	CELF1	-2.40417	1.11645	566.072	3.2833e-50	9.69066e-46
TCONS_00003063	TOR1AIP2	0.47687	-0.402716	638.157	3.53037e-50	1.04195e-45
TCONS_00003065	TOR1AIP2	-0.47687	0.402716	638.157	3.53037e-50	1.04195e-45
TCONS_00008516	BRCA2	-1.4291	-0.8897	635.451	4.17698e-50	1.23271e-45
TCONS_00010923	SNAPC5	-1.16036	0.70401	448.612	6.4159e-50	1.8934e-45
TCONS_00006507	TAF1D	-1.05236	0.466588	637.419	6.7416e-50	1.98945e-45
TCONS_00028251	GCLC	-1.96427	-1.1866	822.729	7.01872e-50	2.07116e-45
TCONS_00018901	PRKD3	-0.561875	-0.541923	566.779	8.74076e-50	2.57896e-45
TCONS_00030783	RHPN1	-2.51824	1.12616	603.382	8.86532e-50	2.61563e-45
TCONS_00026283	REEP5	-1.54891	0.424402	801.807	1.0333e-49	3.04853e-45
TCONS_00029916	FAM133B	-1.50439	-1.10576	626.809	1.07881e-49	3.18259e-45
TCONS_00009956	GPR68	-1.87474	-0.864709	805.813	1.08593e-49	3.2035e-45
TCONS_00019432	IFIH1	2.34304	0.309085	1353.15	1.08672e-49	3.20573e-45
TCONS_00019436	IFIH1	-2.34304	-0.309085	1353.15	1.08672e-49	3.20573e-45
TCONS_00009454	FLVCR2	1.14854	-0.832067	361.499	1.09643e-49	3.23413e-45
TCONS_00021017	MX2	2.2444	0.337249	1277.56	1.20986e-49	3.56848e-45
TCONS_00021018	MX2	-2.2444	-0.337249	1277.56	1.20986e-49	3.56848e-45
TCONS_00014013	CCL15-CCL14	0.0442624	1.41544	190.075	1.36381e-49	4.02215e-45
TCONS_00119206_add	ZNF197	-1.83137	-1.22156	775.307	1.48283e-49	4.37302e-45
TCONS_00025064	DDX60	0.235521	0.496013	553.89	1.75983e-49	5.18957e-45
TCONS_00020796	ADNP	-1.40336	1.24826	225.287	1.96085e-49	5.78216e-45
TCONS_00026117	HMGCS1	0.922335	-0.617865	471.659	2.09359e-49	6.17338e-45
TCONS_00000805	SRGAP2B	-1.24089	0.428401	716.886	2.13934e-49	6.30806e-45
TCONS_00012489	XLOC_004047	-2.03214	-1.1931	853.848	2.57543e-49	7.59367e-45
TCONS_00009780	PPP2R3C	-1.18882	1.39682	154.943	2.61867e-49	7.72089e-45
TCONS_00026924	HLA-F	-1.64957	0.38839	874.634	2.86493e-49	8.44668e-45
TCONS_00006819	CLEC2D	-0.990956	0.78502	362.705	2.91444e-49	8.59236e-45
TCONS_00006176	MS4A6A	-1.09694	-1.14523	476.443	3.18406e-49	9.38694e-45
TCONS_00008684	FARP1	-1.84662	0.995691	431.161	4.16153e-49	1.22682e-44
TCONS_00014894	ZCCHC2	-1.34906	0.328823	876.556	4.71078e-49	1.38869e-44
TCONS_00003512	PFKFB3	-0.382538	0.815206	300.769	4.93651e-49	1.45518e-44
TCONS_00004403	ARHGAP22	0.422186	-1.03164	205.021	5.10944e-49	1.50611e-44
TCONS_00025217	IRF2	-0.0944471	0.38663	641.493	5.33919e-49	1.57378e-44
TCONS_00005941	DENND5A	0.593317	0.492949	606.913	5.77802e-49	1.70307e-44
TCONS_00027270	FGD2	-1.3844	0.341111	866.236	5.81973e-49	1.71531e-44
TCONS_00000682_add	PRAMEF9	-0.0982523	-1.73675	492.506	6.79328e-49	2.00205e-44
TCONS_00006554	CASP1	-1.01998	-0.459104	732.099	7.46758e-49	2.2007e-44
TCONS_00017791	MAT2A	0.236456	-0.515011	505.431	9.23307e-49	2.72071e-44
TCONS_00003059	ABL2	-3.59514	1.15073	1047.83	1.17853e-48	3.47266e-44
TCONS_00002917	ARHGEF11	0.806324	-0.443085	615.716	1.18259e-48	3.4845e-44
TCONS_00026448	NR3C1	-1.4697	-0.373167	946.748	1.84803e-48	5.44484e-44
TCONS_00026451	NR3C1	1.4697	0.373167	946.748	1.84803e-48	5.44484e-44
TCONS_00001010	INTS3	2.68736	-0.767097	858.034	2.72377e-48	8.02423e-44
TCONS_00009779	PPP2R3C	0.595769	-1.16197	157.82	3.01831e-48	8.89104e-44
TCONS_00007896	MMP19	-2.8025	1.36843	723.277	3.48261e-48	1.02584e-43
TCONS_00029043	GTF2I	-2.37175	0.897169	650.885	5.55749e-48	1.6369e-43
TCONS_00073623_add	NLRP1	-1.46674	0.584862	599.956	6.1134e-48	1.80052e-43
TCONS_00032297	CBWD5	-2.19665	1.46147	470.12	6.22971e-48	1.83471e-43
TCONS_00022232	ATG7	-0.316732	1.17722	159.276	6.39374e-48	1.88296e-43
TCONS_00021938	RPS19BP1	-1.80841	-0.854856	772.88	6.46896e-48	1.90504e-43
TCONS_00026593	RAB24	-1.13502	0.466544	641.085	6.62174e-48	1.94997e-43
TCONS_00014763	TGIF1	-1.88339	-0.791037	821.326	7.15673e-48	2.10737e-43
TCONS_00021175	GART	-2.72111	0.6812	936.107	7.56714e-48	2.22814e-43
TCONS_00023674	XLOC_007339	-0.228035	-1.56172	306.147	7.9316e-48	2.33538e-43
TCONS_00001021	SLC27A3	-0.894431	-0.95644	433.85	8.20061e-48	2.41451e-43
TCONS_00018849	GTF3C2	1.74236	0.489206	928.613	8.55771e-48	2.51956e-43
TCONS_00018851	GTF3C2	-1.74236	-0.489206	928.613	8.55771e-48	2.51956e-43
TCONS_00032198	DDX58	-0.228261	-0.889129	307.105	8.74783e-48	2.57536e-43
TCONS_00023244	SATB1	0.0350685	1.13618	203.934	9.08755e-48	2.67528e-43
TCONS_00019874	MGME1	0.701947	0.893777	400.237	1.06502e-47	3.13522e-43
TCONS_00008931	TBC1D4	1.38386	-1.19801	228.248	1.12323e-47	3.30646e-43
TCONS_00026118	HMGCS1	-0.92565	0.581213	491.65	1.14521e-47	3.37103e-43
TCONS_00010524	AKAP13	-0.464346	-0.590083	500.915	1.30039e-47	3.82771e-43
TCONS_00024170	CD38	-0.887847	0.373426	706.337	1.30993e-47	3.85566e-43
TCONS_00025467	ERBB2IP	-0.427468	-0.562197	514.628	1.35505e-47	3.98832e-43
TCONS_00000384	THRAP3	-0.500271	0.558674	466.524	1.53519e-47	4.51821e-43
TCONS_00010846	CCPG1	-1.78715	-0.801991	778.451	1.67228e-47	4.92153e-43
TCONS_00022780	ATP2C1	-1.55692	-0.408947	931.145	2.39688e-47	7.05378e-43
TCONS_00018254	ITGAV	-1.22561	0.665817	473.624	2.49376e-47	7.33864e-43
TCONS_00018645	GIGYF2	-0.110573	0.916375	253.282	3.39083e-47	9.97752e-43
TCONS_00014817	RNMT	-1.92842	1.05035	420.011	3.47076e-47	1.0212e-42
TCONS_00006506	TAF1D	1.04569	-0.502528	581.322	3.72311e-47	1.09538e-42
TCONS_00032702	RALGDS	-2.13852	0.463914	925.723	4.58439e-47	1.34868e-42
TCONS_00028255	EEF1A1	-0.410366	0.173682	1019.02	5.20982e-47	1.53257e-42
TCONS_00028256	EEF1A1	0.410366	-0.173682	1019.02	5.20982e-47	1.53257e-42
TCONS_00017942	LIMS1	-1.47425	-0.449298	863.728	5.75516e-47	1.69288e-42
TCONS_00021185	RUNX1	-1.78152	-1.0478	725.78	7.6612e-47	2.25339e-42
TCONS_00005632	DLAT	-0.205164	0.775121	311.811	8.75177e-47	2.57407e-42
TCONS_00031610	CREB3	0.775718	-0.589123	459.098	1.0286e-46	3.02522e-42
TCONS_00004156	PTPRE	-0.414568	-0.373162	683.954	1.05674e-46	3.10787e-42
TCONS_00001446	CEP350	-2.3867	1.1532	535.829	1.331e-46	3.91409e-42
TCONS_00030012	FIS1	1.46267	-0.909982	361.314	1.52339e-46	4.47939e-42
TCONS_00030796	ZNF707	-2.46784	0.893184	680.208	1.76274e-46	5.18298e-42
TCONS_00006834	ETV6	0.42827	-0.940623	225.053	1.92643e-46	5.6641e-42
TCONS_00174934_add	TRPM3	-1.13558	-1.39644	609.601	2.07485e-46	6.10026e-42
TCONS_00024504	IL15	-1.65064	-0.419365	946.355	2.67275e-46	7.85735e-42
TCONS_00027579	PHACTR2	-2.5303	1.13283	595.388	2.71296e-46	7.97529e-42
TCONS_00027580	PHACTR2	2.5303	-1.13283	595.388	2.71296e-46	7.97529e-42
TCONS_00000298	PHACTR4	1.03458	0.639918	590.66	3.01224e-46	8.85447e-42
TCONS_00028064	HLA-DOA	1.72523	0.809752	744.958	3.12087e-46	9.17348e-42
TCONS_00028069	HLA-DOA	-1.72523	-0.809752	744.958	3.12087e-46	9.17348e-42
TCONS_00020243	C20orf96	-0.927049	0.951311	245.855	3.22842e-46	9.48897e-42
TCONS_00014383	BRIP1	-2.79511	0.933016	782.367	3.39941e-46	9.99121e-42
TCONS_00012866	ALKBH5	-2.0054	-0.90416	829.416	3.58602e-46	1.05393e-41
TCONS_00030011	FIS1	-1.47369	0.880817	377.21	4.49542e-46	1.32111e-41
TCONS_00031206	AZIN1	1.00166	0.310682	874.529	4.61651e-46	1.35665e-41
TCONS_00008390	SCARB1	-2.24542	0.60498	811.277	4.75507e-46	1.39728e-41
TCONS_00027243	C6orf89	-0.224177	-0.566817	472.982	4.91172e-46	1.44326e-41
TCONS_00027244	C6orf89	0.224177	0.566817	472.982	4.91172e-46	1.44326e-41
TCONS_00024675	ACOX3	-0.489571	0.53705	474.543	5.49186e-46	1.61362e-41
TCONS_00000402	MACF1	-0.337798	0.473386	527.961	5.5462e-46	1.62953e-41
TCONS_00018666	LRRFIP1	1.33937	0.555732	731.41	6.93244e-46	2.03668e-41
TCONS_00018680	LRRFIP1	-1.33937	-0.555732	731.41	6.93244e-46	2.03668e-41
TCONS_00012259	BOLA2	-2.67604	0.612715	965.911	7.57233e-46	2.22452e-41
TCONS_00000909	PRPF3	-0.478301	0.548502	462.616	8.78251e-46	2.57995e-41
TCONS_00163453_add	TNKS	-0.520508	-0.641873	465.453	8.8347e-46	2.59519e-41
TCONS_00004702	MCMBP	-3.41023	1.0376	990.688	8.88908e-46	2.61108e-41
TCONS_00017798	MAT2A	-2.98729	0.535248	1168.92	8.96563e-46	2.63348e-41
TCONS_00013033	CCL4	0.849041	-1.0832	180.785	9.99314e-46	2.93508e-41
TCONS_00008166	HVCN1	-2.67981	1.12555	655.178	1.04055e-45	3.05611e-41
TCONS_00018091	CCNT2	-1.04581	-0.630004	595.999	1.04701e-45	3.07496e-41
TCONS_00021359	ASPHD2	-0.605861	1.49054	103.768	1.08048e-45	3.17316e-41
TCONS_00006726	WNK1	-0.704955	0.473793	550.796	1.1506e-45	3.37897e-41
TCONS_00009479	KCNK13	0.80697	1.15468	368.246	1.1511e-45	3.38031e-41
TCONS_00009480	KCNK13	-0.80697	-1.15468	368.246	1.1511e-45	3.38031e-41
TCONS_00008535	NHLRC3	1.73823	-0.590065	655.338	1.19495e-45	3.50885e-41
TCONS_00001897	CDK11B	-2.17002	0.620872	767.484	1.25877e-45	3.69612e-41
TCONS_00009353	MPP5	-1.08567	-0.977789	474.75	1.29279e-45	3.79575e-41
TCONS_00021098	PRMT2	-0.918871	0.349127	732.041	1.29709e-45	3.80827e-41
TCONS_00131120_add	GUCY1A3	-2.52113	1.08672	604.095	1.29832e-45	3.81174e-41
TCONS_00024486	C4orf33	-0.994259	-0.523585	651.721	1.33551e-45	3.92065e-41
TCONS_00024487	C4orf33	0.994259	0.523585	651.721	1.33551e-45	3.92065e-41
TCONS_00010799	ATP8B4	-0.00356423	0.951565	239.427	1.54924e-45	4.54778e-41
TCONS_00000230	SRRM1	-2.0864	1.02635	472.282	1.70939e-45	5.01757e-41
TCONS_00012326	AMFR	-0.048615	0.650549	385.562	1.9841e-45	5.82373e-41
TCONS_00020286	SNRPB	-1.00229	-0.35889	808.274	2.0156e-45	5.916e-41
TCONS_00009960	SMEK1	-0.74459	-0.466047	637.677	2.20167e-45	6.46167e-41
TCONS_00022432	ATRIP	-2.2907	-0.481392	1130.27	2.22161e-45	6.51997e-41
TCONS_00023449	RASSF1	-1.43494	-0.567247	751.371	2.34174e-45	6.87208e-41
TCONS_00023822	ISY1-RAB43	0.355866	0.455747	578.773	2.53953e-45	7.45201e-41
TCONS_00033491	IQSEC2	-2.94795	0.769207	943.549	2.76816e-45	8.1226e-41
TCONS_00032362	ZCCHC6	-1.2366	-0.607072	662.841	2.79198e-45	8.19222e-41
TCONS_00000303	RCC1	0.272161	-0.529284	470.073	3.00263e-45	8.80973e-41
TCONS_00017664	XLOC_005595	0.60265	1.34077	330.055	4.28405e-45	1.25681e-40
TCONS_00007820	SLC11A2	-1.67245	0.360458	893.5	4.56694e-45	1.33976e-40
TCONS_00002523	GBP4	1.36749	0.447536	817.907	5.66555e-45	1.66193e-40
TCONS_00007275	SOCS2	-1.63082	0.93194	380.914	6.43455e-45	1.88738e-40
TCONS_00073338_add	C17orf85	-1.10487	1.06692	211.268	6.70936e-45	1.96792e-40
TCONS_00021023	MX1	-0.640105	0.209751	936.671	7.31184e-45	2.14456e-40
TCONS_00116021_add	SLC5A4	-1.18839	-1.36958	630.844	7.46755e-45	2.19016e-40
TCONS_00004927	HTATIP2	0.295698	-0.601616	408.498	8.16544e-45	2.39468e-40
TCONS_00010995	SIN3A	-1.45865	0.528699	630.679	8.37022e-45	2.45465e-40
TCONS_00031583	NFX1	-0.337842	0.323497	700.745	8.88851e-45	2.60656e-40
TCONS_00017965	TTL	-0.303268	-0.585717	460.622	9.31454e-45	2.7313e-40
TCONS_00014554	SRSF2	0.92513	0.70233	517.709	9.76006e-45	2.86185e-40
TCONS_00014076	JUP	-2.73244	-0.919149	1129.06	1.05656e-44	3.09794e-40
TCONS_00167060_add	CA8	-1.2153	-1.35779	631.305	1.12069e-44	3.28574e-40
TCONS_00007837	TFCP2	-0.153876	-0.34824	673.684	1.14388e-44	3.35364e-40
TCONS_00010882	VPS13C	-0.219127	-0.538799	484.842	1.21821e-44	3.57142e-40
TCONS_00010883	VPS13C	0.219127	0.538799	484.842	1.21821e-44	3.57142e-40
TCONS_00020834	ZBP1	-3.0824	0.49198	1248.88	1.33842e-44	3.9233e-40
TCONS_00011084	RHCG	-0.414233	-1.51394	399.324	1.36816e-44	4.01036e-40
TCONS_00023995	BCL6	-1.40987	-0.642429	693.667	1.42004e-44	4.16229e-40
TCONS_00028338	ASCC3	-0.253021	0.494738	496.441	1.54602e-44	4.53139e-40
TCONS_00024135	XLOC_007542	-1.07575	-1.31989	518.407	2.30306e-44	6.74958e-40
TCONS_00033311	FMR1	-1.25879	-0.99388	522.904	2.34606e-44	6.87514e-40
TCONS_00021369	HSCB	-1.60927	-1.01849	648.959	2.36357e-44	6.9262e-40
TCONS_00006856	PTPRO	-1.86675	-0.340263	1095.06	2.40264e-44	7.04046e-40
TCONS_00000564	SRSF11	-1.0962	0.437855	642.189	2.4428e-44	7.15789e-40
TCONS_00088272_add	ANGPTL6	-1.97163	-1.15639	818.565	2.51967e-44	7.38264e-40
TCONS_00022203	SETD5	-0.0944968	-0.506394	497.729	2.60173e-44	7.62281e-40
TCONS_00014437	DDX5	-1.2841	0.442413	676.591	3.28118e-44	9.61321e-40
TCONS_00016364	TCF3	-0.287216	0.518164	472.732	3.56967e-44	1.04581e-39
TCONS_00008939	TBC1D4	-2.15273	0.987733	505.286	3.97909e-44	1.16571e-39
TCONS_00005097	FAM111A	-1.77628	0.443334	809.661	4.31976e-44	1.26547e-39
TCONS_00014532	EXOC7	0.224566	0.559797	464.946	4.93419e-44	1.44537e-39
TCONS_00008171	NAA25	0.0386428	0.59923	417.595	5.19893e-44	1.52287e-39
TCONS_00018384	CFLAR	-2.11924	-0.480775	1052.84	5.54705e-44	1.62473e-39
TCONS_00002607	ADORA3	-0.495162	1.32965	104.888	5.78687e-44	1.69486e-39
TCONS_00033209	NXT2	-2.18895	0.971209	524.696	5.89608e-44	1.72679e-39
TCONS_00008001	CYP27B1	-0.662017	-1.181	318.391	5.96396e-44	1.74661e-39
TCONS_00032284	LOC440896	-1.39904	-1.25963	623.884	6.60134e-44	1.9332e-39
TCONS_00001027	SLC27A3	-2.30195	0.544336	875.737	8.04415e-44	2.35557e-39
TCONS_00013491	SEC14L1	-1.0575	-0.743158	529.474	8.60035e-44	2.51835e-39
TCONS_00064125_add	ZNF276	-0.868972	-0.532999	600.347	9.89749e-44	2.89799e-39
TCONS_00031609	CREB3	-0.777431	0.551482	471.539	1.05285e-43	3.08263e-39
TCONS_00027826	FAM65B	-0.99375	0.476496	576.009	1.05544e-43	3.09012e-39
TCONS_00017787	MAT2A	-0.646826	0.38649	630.701	1.0986e-43	3.21626e-39
TCONS_00014384	BRIP1	-1.05333	-0.507627	666.538	1.25497e-43	3.67392e-39
TCONS_00033599	LAMP2	-1.78378	0.276733	1055.79	1.32049e-43	3.86548e-39
TCONS_00033600	LAMP2	1.78378	-0.276733	1055.79	1.32049e-43	3.86548e-39
TCONS_00022427	ZNF589	-0.984129	-0.733158	511.681	1.34248e-43	3.92957e-39
TCONS_00025582	PAPD4	-0.733021	0.38177	645.905	1.51794e-43	4.443e-39
TCONS_00023563	TMEM110-MUSTN1	0.30837	0.571818	462.959	1.61141e-43	4.71643e-39
TCONS_00019703	ILKAP	1.14827	1.025	476.935	1.75517e-43	5.13704e-39
TCONS_00033263	STAG2	-2.00764	-0.748625	858.25	1.89459e-43	5.54491e-39
TCONS_00028295	FAM46A	-0.480325	0.488951	501.506	1.8953e-43	5.54679e-39
TCONS_00019129	CCDC142	-2.52965	0.450662	1063.72	1.94608e-43	5.6952e-39
TCONS_00021549	GTPBP1	-0.7288	-0.621062	505.627	1.99546e-43	5.8393e-39
TCONS_00002142	FGR	-2.49001	0.354467	1178.25	2.23759e-43	6.54742e-39
TCONS_00029216	KMT2E	-1.53964	-1.13932	627.99	2.31459e-43	6.7725e-39
TCONS_00009620	CRIP1	-2.91926	0.650825	1013.95	2.45575e-43	7.18528e-39
TCONS_00020175	NELFCD	-1.25932	0.681803	442.193	2.52288e-43	7.38144e-39
TCONS_00002282	RRAGC	-2.37821	0.446886	1009.26	2.53253e-43	7.40943e-39
TCONS_00031201	UBR5	-2.98294	0.850338	891.269	2.93672e-43	8.59168e-39
TCONS_00012304	MYLK3	-0.62012	-1.43667	434.478	3.22313e-43	9.42895e-39
TCONS_00023279	LRRFIP2	-0.646587	-0.614595	490.283	3.27909e-43	9.59231e-39
TCONS_00008076	TMCC3	-1.18807	-0.789446	546.091	3.83427e-43	1.12156e-38
TCONS_00002865	ASH1L	-1.69133	1.33481	266.35	4.41782e-43	1.29217e-38
TCONS_00006276	STX5	-3.62363	1.03707	1079.14	4.47945e-43	1.31015e-38
TCONS_00026254	ELL2	-0.684165	-0.86001	378.742	4.65252e-43	1.36072e-38
TCONS_00026695	MGAT1	-1.59277	-0.346624	982.019	4.82821e-43	1.41206e-38
TCONS_00032274	FAM95B1	-2.11074	0.402321	965.809	5.2698e-43	1.54115e-38
TCONS_00157480_add	WDR60	-1.91227	1.24086	343.748	5.35161e-43	1.56502e-38
TCONS_00018241	SSFA2	0.203896	0.633852	402.752	6.02401e-43	1.76148e-38
TCONS_00015646	GRAMD1A	-1.25176	1.02988	238.386	7.12065e-43	2.08208e-38
TCONS_00033236	IL13RA1	-0.593633	-0.309174	768.844	8.61637e-43	2.51925e-38
TCONS_00019044	SPRED2	1.09215	-0.797623	328.968	8.90486e-43	2.60342e-38
TCONS_00001457	MR1	0.97767	-0.48217	560.676	9.51571e-43	2.78192e-38
[truncated: 14,249 more rows]
