# Supplementary material for: Genetic analysis of isoform usage in the human anti-viral response reveals influenza-specific regulation of ERAP2 transcripts under balancing selection
Source: Genome Res. 2018 Dec;28(12):1812–25. doi: 10.1101/gr.240390.118 (PMC6280757; doi:10.1101/gr.240390.118)
Supplement: Supplemental Material [file supp_gr.240390.118_SupplementalTable4.xlsx]

## Sheet: Flu vs Baseline
gene	baseMean	log2FoldChange	lfcSE	stat	pvalue	padj
AAED1	984.938	-1.54175	0.0257823	-59.7987	0	0
ABAT	229.919	2.9922	0.0636832	46.9858	0	0
ABCC5	379.19	3.21247	0.0701398	45.801	0	0
ABCD1	1930.97	-1.61968	0.0359368	-45.0703	0	0
ABCF3	863.647	1.26012	0.02595	48.5596	0	0
ABHD10	366.779	1.60235	0.0405498	39.5157	0	0
ABHD4	431.712	2.04573	0.0465457	43.951	0	0
ABHD6	262.452	1.41985	0.0353948	40.1145	0	0
ABL1	834.782	1.72572	0.0325512	53.0154	0	0
ABTB1	168.495	1.86613	0.0458964	40.6597	0	0
ABTB2	1376.24	-3.80419	0.0494415	-76.9433	0	0
ACAP3	270.427	1.51065	0.0349014	43.2832	0	0
ACO1	3717.52	-2.23053	0.0525539	-42.4427	0	0
ACOT9	2302.83	-0.941852	0.0205166	-45.9068	0	0
ACOX3	1393.97	-2.36263	0.0603697	-39.136	0	0
ACSL1	5042.81	-2.28906	0.0486162	-47.0842	0	0
ACTN2	601.951	-8.64299	0.113505	-76.1464	0	0
ACTR1A	2059.64	0.529732	0.0117187	45.204	0	0
ACVR2B	116.706	1.59107	0.0332329	47.8765	0	0
ADAD2	585.708	-4.37385	0.106288	-41.151	0	0
ADAM10	2304.11	0.75465	0.0182841	41.2736	0	0
ADAM17	2998.25	-1.40406	0.028704	-48.915	0	0
ADAR	21348.2	-1.66173	0.0185018	-89.8142	0	0
ADHFE1	311.674	2.11311	0.0544197	38.8299	0	0
ADIPOR1	2498.45	0.596395	0.0155649	38.3166	0	0
ADM	775.002	-3.46343	0.0648594	-53.3991	0	0
ADORA3	548.439	3.96513	0.0998284	39.7194	0	0
ADPRH	1768.1	-1.33199	0.0318957	-41.7607	0	0
ADPRHL2	1483.53	-1.4704	0.0163028	-90.1929	0	0
ADPRM	194.233	-1.87345	0.0381717	-49.0797	0	0
AFAP1	3057.93	-5.65057	0.132994	-42.4876	0	0
AFF4	5204.57	-1.89543	0.0364828	-51.954	0	0
AGGF1	760.437	0.834556	0.0174776	47.75	0	0
AGO1	493.467	1.13918	0.0250423	45.4904	0	0
AGO3	906.138	-2.24495	0.0461472	-48.6476	0	0
AGO4	830.463	1.29934	0.0215453	60.3076	0	0
AGPHD1	856.47	-1.91765	0.0256212	-74.8459	0	0
AGPS	1677.39	0.63848	0.0163687	39.0062	0	0
AGTPBP1	492.32	1.20204	0.0214616	56.0089	0	0
AHSA1	1928.15	-0.709131	0.0188447	-37.6302	0	0
AIDA	556.647	-2.00899	0.0216798	-92.6666	0	0
AIFM1	1163.45	1.65188	0.0385293	42.8733	0	0
AIM2	577.587	-4.93879	0.0462293	-106.833	0	0
AK056817	911.035	-2.65346	0.0457116	-58.0478	0	0
AK126539	98.9656	-3.60124	0.0748626	-48.1047	0	0
AK311380	671.504	-1.4033	0.0283268	-49.5395	0	0
AKAP11	2779.57	1.51509	0.0366846	41.3004	0	0
AKAP7	269.329	-2.54546	0.0397534	-64.0314	0	0
AKIRIN2	1920.06	-1.47278	0.0257177	-57.267	0	0
ALDH9A1	1745.81	1.5554	0.0320591	48.5165	0	0
ALKBH7	100.885	1.45893	0.0387568	37.6433	0	0
ALX1	62.2363	-6.16067	0.141115	-43.657	0	0
AMBRA1	1190.09	-0.860223	0.0178875	-48.0906	0	0
AMDHD2	288.566	2.18247	0.0560772	38.919	0	0
AMOTL2	579.645	-8.58174	0.115169	-74.514	0	0
AMPD2	367.632	2.27788	0.0472441	48.2153	0	0
ANAPC7	490.042	1.38018	0.0367447	37.5614	0	0
ANGPT2	112.019	-5.18355	0.131587	-39.3926	0	0
ANKFY1	4813	-0.96689	0.0192096	-50.3338	0	0
ANKIB1	2165.18	-1.45987	0.0191421	-76.2651	0	0
ANKRD1	198.156	-6.80605	0.165617	-41.0952	0	0
ANO8	195.105	1.72698	0.0377231	45.7803	0	0
AP1B1	7064.3	1.35023	0.0324814	41.5694	0	0
AP2A1	1769.23	0.969341	0.0215256	45.0319	0	0
AP2A2	3986.42	3.13859	0.0565377	55.5133	0	0
AP2M1	10057.6	1.10003	0.0250137	43.977	0	0
AP3M1	1082.52	0.729889	0.0171484	42.5631	0	0
API5	1745.91	0.872065	0.0225443	38.6822	0	0
APMAP	2625.08	1.64128	0.0312389	52.5396	0	0
APOBEC3A_B	21044.6	-7.70718	0.12063	-63.8912	0	0
APOBEC3B	537.842	-5.4872	0.14346	-38.2491	0	0
APOBEC3F	114.002	-2.35995	0.0424499	-55.5937	0	0
APOBEC3G	3892.43	-4.55363	0.0664646	-68.5121	0	0
APOL1	5113.64	-2.53817	0.0330807	-76.7267	0	0
APOL2	3786.91	-2.65563	0.0259288	-102.42	0	0
APOL3	4528.76	-4.36093	0.0768149	-56.7719	0	0
APOL6	11557.7	-2.9887	0.0232695	-128.439	0	0
APPL2	511.005	3.4575	0.0532919	64.8786	0	0
ARAP2	7574.77	-2.80667	0.0468508	-59.9066	0	0
ARC	84.5838	-6.74053	0.138992	-48.4958	0	0
ARCN1	5171.61	-0.789222	0.0198147	-39.8301	0	0
ARFGAP2	1221.34	0.871573	0.0142169	61.3053	0	0
ARHGAP25	5180.67	-1.19623	0.0236581	-50.5632	0	0
ARHGAP27	3358.56	-1.51946	0.025521	-59.5376	0	0
ARHGAP4	1196.5	1.33515	0.0339473	39.33	0	0
ARHGDIB	8603.2	1.33068	0.0341268	38.9922	0	0
ARHGEF11	6376.65	-1.59065	0.0353602	-44.9842	0	0
ARHGEF19	256.445	-4.52082	0.0601361	-75.1765	0	0
ARID4B	2813.7	-2.00392	0.0257156	-77.9263	0	0
ARID5A	4170.34	-2.93022	0.0334969	-87.4774	0	0
ARL1	563.591	0.912868	0.0205522	44.4171	0	0
ARL2BP	580.035	1.04122	0.0212453	49.0098	0	0
ARL3	131.157	2.07267	0.0366086	56.6169	0	0
ARL4A	903.303	-3.17793	0.0772919	-41.1159	0	0
ARL5B	4219.31	-4.21619	0.0638623	-66.02	0	0
ARL6IP6	954.433	-1.23239	0.0177561	-69.4065	0	0
ARL8B	5440.61	-1.11141	0.0283145	-39.2523	0	0
ARMC1	415.348	1.08275	0.0259574	41.7125	0	0
ARRB1	2406.03	1.49162	0.0315718	47.2452	0	0
ARRDC3	2994.41	-2.21624	0.0494502	-44.8177	0	0
ART3	1021	-9.73774	0.232712	-41.8446	0	0
ARV1	215.188	2.72241	0.033137	82.1562	0	0
ASB8	514.233	0.766934	0.0161297	47.5478	0	0
ASPHD2	744.687	-3.18671	0.0551033	-57.8317	0	0
ASPSCR1	171.926	1.33209	0.0263953	50.4668	0	0
ASTL	143.451	-6.98444	0.115828	-60.2998	0	0
ATF2	1571.94	-0.664949	0.0176649	-37.6424	0	0
ATF3	20002.1	-6.89581	0.0513321	-134.337	0	0
ATF4	4015.47	-1.19789	0.0297383	-40.2813	0	0
ATF5	14249.3	-2.72296	0.0495792	-54.9214	0	0
ATF6B	1914.14	1.03335	0.0222382	46.4673	0	0
ATG16L2	449.182	2.34186	0.0570124	41.0764	0	0
ATG3	3656.69	-1.08779	0.0256365	-42.4314	0	0
ATG4C	389.457	1.78458	0.0422244	42.2641	0	0
ATG9A	697.987	2.15484	0.0286524	75.2066	0	0
ATP10A	1699.61	-4.80564	0.0530102	-90.6549	0	0
ATPAF2	183.82	1.87139	0.0424557	44.0786	0	0
ATXN7	1740.78	-1.38341	0.026448	-52.307	0	0
ATXN7L1	1559.01	-3.41797	0.0389073	-87.8491	0	0
AX747750	588.632	-7.18604	0.119755	-60.0062	0	0
AXL	713.283	-5.52495	0.091064	-60.6711	0	0
AZI2	1405.05	-1.66911	0.0263442	-63.3577	0	0
AZIN1	5770.39	-1.34781	0.030141	-44.7167	0	0
B2M	122807	-1.06297	0.0205149	-51.8144	0	0
B3GAT3	257.458	1.39139	0.0300842	46.2498	0	0
B3GNT2	3003.5	-2.26098	0.036492	-61.9582	0	0
B4GALT5	4283.8	-2.37251	0.041948	-56.5584	0	0
BAG1	2094.97	-1.34483	0.020587	-65.3242	0	0
BAIAP2-AS1	223.209	3.79463	0.0597962	63.4593	0	0
BAMBI	715.29	-7.88618	0.112145	-70.3211	0	0
BANK1	687.801	-3.42184	0.0702283	-48.7246	0	0
BATF2	2030.62	-4.28079	0.0360274	-118.82	0	0
BAZ1A	10059.7	-2.13883	0.0226151	-94.5754	0	0
BBC3	2028.2	-5.14315	0.0634863	-81.0119	0	0
BBX	2179.07	-1.55884	0.0262706	-59.3375	0	0
BC009467	45.1288	2.00636	0.0471054	42.593	0	0
BC017818	463.594	-2.81449	0.0650263	-43.2823	0	0
BC058012	299.084	-9.98766	0.187165	-53.3628	0	0
BCL10	1157.17	-1.58469	0.0322004	-49.2135	0	0
BCL2A1	2839.32	-7.22476	0.120501	-59.9561	0	0
BCL2L13	1716.1	-1.11543	0.0256531	-43.4813	0	0
BCL7A	223.294	2.78521	0.0528045	52.7457	0	0
BICD2	1141.34	1.16054	0.0272199	42.6357	0	0
BIRC2	2322.7	-1.0088	0.0214157	-47.1054	0	0
BIVM-ERCC5	877.732	0.991223	0.0201255	49.2522	0	0
BLCAP	722.79	1.28452	0.0204669	62.761	0	0
BLVRB	1093.46	2.11495	0.0503485	42.0063	0	0
BLZF1	4595.67	-4.07428	0.0340879	-119.523	0	0
BMP2	353.894	-7.74609	0.148281	-52.2393	0	0
BMPR2	4692.08	-1.30945	0.0183662	-71.2964	0	0
BNIP2	2445.67	0.605073	0.0149582	40.4511	0	0
BOC	305.924	-8.86697	0.128968	-68.753	0	0
BOLA2	821.773	1.20194	0.02768	43.4227	0	0
BRAT1	347.582	1.32966	0.0351142	37.8667	0	0
BRCA2	1517.21	-1.92661	0.0462436	-41.6623	0	0
BRD2	6861.03	-1.38818	0.0208085	-66.7118	0	0
BRI3BP	449.995	1.94058	0.0504675	38.4521	0	0
BRIP1	2198.64	-4.73491	0.0510809	-92.6942	0	0
BSDC1	754.699	0.742326	0.0149128	49.7778	0	0
BST2	4892.29	-1.34238	0.0274186	-48.9585	0	0
BTAF1	2839.2	-0.857793	0.0202374	-42.3866	0	0
BTF3L4	751.074	1.10751	0.0183141	60.4734	0	0
BTG1	4358.43	-3.03667	0.0751958	-40.3835	0	0
BTG3	552.239	-2.11207	0.0470591	-44.8812	0	0
BTN2A1	1193.1	-1.23795	0.0233865	-52.9346	0	0
C12orf57	410.012	-3.21671	0.0656999	-48.9606	0	0
C12orf63	92.7705	-9.3529	0.240198	-38.9383	0	0
C14orf119	1360.64	1.11854	0.0257814	43.3858	0	0
C14orf37	306.187	1.27311	0.0239615	53.1315	0	0
C15orf26	86.5194	-5.2581	0.138952	-37.8412	0	0
C17orf67	171.278	-4.27671	0.0971959	-44.001	0	0
C18orf25	757.458	-1.03354	0.0168259	-61.4258	0	0
C19orf66	2425.72	-2.25032	0.019319	-116.482	0	0
C21orf33	645.683	1.73634	0.0304874	56.9527	0	0
C21orf91	2914.28	-3.90565	0.0444923	-87.7825	0	0
C3orf38	2177.22	-2.40454	0.0237097	-101.416	0	0
C5	437.201	-2.71274	0.0611941	-44.3301	0	0
C5orf15	3724.65	-1.3758	0.0323968	-42.4673	0	0
C5orf22	937.51	-0.884159	0.0161352	-54.7969	0	0
C5orf56	219.423	-4.33512	0.0494149	-87.7289	0	0
C6orf141	103.451	-4.56039	0.0877336	-51.9799	0	0
C6orf62	14440.3	-1.11069	0.0220508	-50.3698	0	0
C6orf89	1653.33	0.803133	0.0165526	48.5201	0	0
C7orf25	5545.13	-1.81312	0.0214966	-84.3446	0	0
C7orf60	707.787	-1.48728	0.0370461	-40.1467	0	0
C9orf123	242.247	1.66636	0.0362251	46.0003	0	0
C9orf69	278.54	1.46797	0.0365766	40.1341	0	0
C9orf91	2131.86	-3.03359	0.0418713	-72.4505	0	0
CABIN1	1188.35	1.31561	0.0347094	37.9035	0	0
CACNA1A	166.912	-7.38857	0.115121	-64.1809	0	0
CAHM	1646.13	-3.67918	0.0664631	-55.3568	0	0
CALCOCO1	781.635	1.31389	0.0328574	39.9878	0	0
CALCOCO2	2532.86	-1.38839	0.0196898	-70.5131	0	0
CALU	2290.68	1.68465	0.0398418	42.2834	0	0
CAMK1D	1968.82	1.21648	0.0284556	42.75	0	0
CAMK2D	1418.72	-2.30913	0.0434756	-53.1132	0	0
CAPRIN1	4568.7	0.585896	0.0127645	45.9004	0	0
CARD16	170.017	-4.1163	0.0700664	-58.7486	0	0
CASP1	6146.2	-1.98743	0.0316775	-62.7393	0	0
CASP10	2164.79	-2.11476	0.0312363	-67.7021	0	0
CASP3	2610.84	-1.16431	0.0287644	-40.4776	0	0
CASP4	4904.03	-1.71952	0.0344799	-49.8702	0	0
CASP7	2012.71	-2.08755	0.0327213	-63.798	0	0
CASP8	1041.06	-0.948514	0.0211545	-44.8374	0	0
CBR1	3137.9	-1.61527	0.0385435	-41.9078	0	0
CBWD1	724.543	-1.60511	0.0394278	-40.7101	0	0
CBWD2	805.991	-2.77767	0.0377848	-73.5131	0	0
CBWD3	745.951	-2.7161	0.0452952	-59.9645	0	0
CBWD6	260.864	-2.20442	0.0469611	-46.9415	0	0
CBX4	698.162	-1.76997	0.0408802	-43.2964	0	0
CBY1	44.9879	1.64754	0.0389983	42.2463	0	0
CC2D1A	353.465	1.31589	0.0265498	49.5631	0	0
CCBL2	1654.42	-1.30539	0.0281503	-46.3724	0	0
CCDC106	120.832	1.9653	0.0432219	45.47	0	0
CCDC109B	1069.46	-1.85116	0.0415495	-44.5531	0	0
CCDC117	2226.56	-2.69225	0.0393136	-68.4813	0	0
CCDC132	795.69	0.574099	0.0148069	38.7724	0	0
CCDC47	2210.76	0.761391	0.0180804	42.1113	0	0
CCDC6	3707.1	-1.50079	0.0343267	-43.7208	0	0
CCDC83	273.633	-5.36677	0.0847354	-63.3357	0	0
CCL20	2972.28	-9.80288	0.196623	-49.8563	0	0
CCL3	14126.5	-3.91959	0.102195	-38.3539	0	0
CCL4	30706.1	-6.06437	0.123402	-49.1431	0	0
CCL4L2	16503.2	-6.7089	0.147717	-45.4173	0	0
CCL5	33280.2	-6.41735	0.124331	-51.6149	0	0
CCL8	23739.3	-5.92052	0.0920159	-64.3424	0	0
CCNJ	822.491	-1.79968	0.0240337	-74.8815	0	0
CCNK	1496.04	-0.905613	0.0209595	-43.2078	0	0
CCNL1	2739.86	-1.53514	0.0276258	-55.569	0	0
CCNT2	1207.24	-1.067	0.0253954	-42.0156	0	0
CCNY	1283.58	1.33338	0.0266793	49.9781	0	0
CCNYL1	2469.13	-1.14769	0.0228037	-50.3291	0	0
CCRL2	747.109	-3.79173	0.0665994	-56.9333	0	0
CCRN4L	2060.64	-4.6836	0.0555869	-84.2572	0	0
CCSER2	2011.15	-1.42329	0.0311032	-45.7601	0	0
CCT6P1	569.137	-4.25939	0.0566581	-75.1771	0	0
CCT6P3	179.13	-2.99746	0.0592722	-50.5711	0	0
CD200R1	1787.29	2.63031	0.0618874	42.5016	0	0
CD274	33154.3	-2.74182	0.0419563	-65.3495	0	0
CD2AP	1245.23	-1.67524	0.0387672	-43.2127	0	0
CD38	4629.25	-5.5698	0.0582586	-95.6048	0	0
CD40	17319.6	-3.09365	0.0554078	-55.8343	0	0
CD80	6664.71	-3.11125	0.0548302	-56.7433	0	0
CD83	25600.5	-3.38858	0.0841947	-40.247	0	0
CD86	8643.01	-1.92578	0.0413079	-46.62	0	0
CDC16	759.097	0.871167	0.0203828	42.7403	0	0
CDC23	427.328	1.28618	0.0222339	57.8477	0	0
CDC42EP3	3145.77	-5.23585	0.0627107	-83.4922	0	0
CDC73	2321.29	-1.51276	0.0152696	-99.0696	0	0
CDK17	1096.69	-1.69326	0.0168252	-100.638	0	0
CDK5RAP1	222.39	1.04863	0.0236474	44.3445	0	0
CENPB	756.453	1.33132	0.0232123	57.3539	0	0
CENPN	597.748	-1.38275	0.0254783	-54.2718	0	0
CENPT	470.735	1.17822	0.0240813	48.9266	0	0
CEP170	3737.96	-1.1095	0.0280443	-39.5624	0	0
CEP57L1	361.146	-1.17324	0.0297657	-39.4159	0	0
CERK	803.653	2.1727	0.0494858	43.9055	0	0
CERS2	2279.42	0.743257	0.0178602	41.6153	0	0
CFLAR	18461	-2.69142	0.0460183	-58.4858	0	0
CH25H	1473.53	-6.12013	0.131384	-46.5821	0	0
CHCHD1	282.401	0.729803	0.0177558	41.1022	0	0
CHD2	3289.63	-1.50411	0.030853	-48.7509	0	0
CHDH	178.841	4.02628	0.0741699	54.2846	0	0
CHMP4B	3282.04	-1.20091	0.023995	-50.0482	0	0
CHMP5	2811.52	-1.12052	0.0181199	-61.8389	0	0
CHMP7	632.325	0.472475	0.0121706	38.821	0	0
CHPF2	784.087	1.09107	0.0216174	50.4716	0	0
CHRNB1	325.751	-1.55169	0.0222813	-69.6408	0	0
CHST12	593.167	-1.98299	0.0373306	-53.1195	0	0
CHSY1	1527.27	-1.34217	0.027064	-49.5924	0	0
CIDEC	1297.97	1.13978	0.0199768	57.0551	0	0
CISD2	1469.1	-1.06689	0.0238777	-44.6812	0	0
CITED2	13949.8	-3.39987	0.0546854	-62.1714	0	0
CIZ1	725.111	1.05943	0.0257635	41.1214	0	0
CKAP4	1323.53	-3.25141	0.0517024	-62.887	0	0
CLCF1	329.655	-6.73521	0.12151	-55.4294	0	0
CLEC2B	1159.03	-1.83325	0.0453288	-40.4433	0	0
CLIC1	12167.9	-0.887	0.0154635	-57.3608	0	0
CLIC4	11257.9	-1.65989	0.0254043	-65.3389	0	0
CLP1	354.102	0.71271	0.0180269	39.536	0	0
CLPX	563.218	1.26302	0.0188893	66.8641	0	0
CLTC	10670.6	1.13306	0.0192475	58.8677	0	0
CMC2	583.346	-1.08614	0.0184756	-58.7875	0	0
CMPK2	12823.4	-5.85482	0.0492732	-118.824	0	0
CNOT4	753.403	-1.1688	0.0176851	-66.0896	0	0
CNP	4782.45	-2.76202	0.0215507	-128.163	0	0
CNTLN	832.361	-1.46975	0.0342737	-42.8829	0	0
COA3	227.967	1.07672	0.0224507	47.9594	0	0
COA4	247.676	1.08319	0.0269799	40.1479	0	0
COG2	369.308	1.22441	0.0252588	48.4744	0	0
COG8	212.887	1.4935	0.0253547	58.9043	0	0
COLGALT1	3112.43	1.88682	0.0463454	40.7121	0	0
COPS7A	709.618	0.844531	0.0154832	54.5449	0	0
COPS7B	304.867	1.19388	0.0314157	38.0028	0	0
COPZ1	1198.93	0.911208	0.0196039	46.4808	0	0
COQ10B	1143.4	-1.85585	0.0228288	-81.2944	0	0
COQ9	472.239	1.47931	0.0356253	41.5242	0	0
CPEB2	3149.36	-2.50559	0.0412115	-60.7983	0	0
CPEB4	3171.71	-1.72106	0.0380126	-45.2761	0	0
CREBBP	2500.22	-0.909827	0.0204693	-44.4484	0	0
CREBRF	2317.69	-1.45093	0.0331298	-43.7954	0	0
CSRNP1	7386.79	-5.11491	0.0429222	-119.167	0	0
CSRNP2	521.904	-2.79422	0.0473516	-59.01	0	0
CSRP2	400.932	-5.12798	0.0834682	-61.4363	0	0
CTDSP1	917.96	1.18968	0.0303791	39.1612	0	0
CTNNBL1	2434.99	-1.32161	0.0166595	-79.3307	0	0
CTR9	974.114	1.08772	0.0207296	52.4719	0	0
CUL3	1136.06	0.650535	0.0151504	42.9384	0	0
CUTC	139.6	1.1843	0.0304958	38.8349	0	0
CXCL11	39262.8	-11.5651	0.114419	-101.077	0	0
CXCL2	3686.34	-4.66199	0.110336	-42.2526	0	0
CXCL3	5312.89	-4.79047	0.125958	-38.0322	0	0
CXCL9	11296.5	-8.96441	0.143865	-62.3111	0	0
CXorf21	3575.87	-2.42118	0.0402734	-60.1185	0	0
CYB5R1	697.441	2.14085	0.0436006	49.1015	0	0
CYLD	5694.05	-1.65074	0.0227345	-72.6093	0	0
CYR61	81.5114	-8.55014	0.227006	-37.6648	0	0
DAB2	2560.27	3.13601	0.0628846	49.8693	0	0
DAGLB	1579.25	0.796497	0.0200806	39.665	0	0
DAPP1	4110.17	-2.55132	0.0473042	-53.9344	0	0
DBP	77.9662	4.24099	0.0938537	45.1872	0	0
DCAF11	1220.2	0.842982	0.0221671	38.0285	0	0
DCAF8	1782.62	0.876325	0.0179409	48.8451	0	0
DCK	2915.01	-1.26188	0.0270243	-46.6945	0	0
DCP1A	2549.26	-2.69077	0.0216967	-124.018	0	0
DCTN2	1217.03	0.734792	0.0170136	43.1885	0	0
DDB1	2847.79	1.1775	0.0291243	40.4303	0	0
DDIT3	203.683	-1.82049	0.0439835	-41.3903	0	0
DDX26B	717.467	-1.82647	0.0268189	-68.1038	0	0
DDX42	2279.48	0.782091	0.0190244	41.1098	0	0
DDX46	1158.85	1.08632	0.0272647	39.8434	0	0
DDX58	36139.8	-5.97152	0.0433501	-137.751	0	0
DDX59	545.463	-1.38816	0.0294057	-47.2073	0	0
DDX60	8817.8	-3.82977	0.0313651	-122.103	0	0
DDX60L	17622.1	-4.65331	0.038444	-121.041	0	0
DECR1	1873.58	-1.02964	0.0229816	-44.8028	0	0
DEF8	929.054	1.4535	0.0348319	41.729	0	0
DEFB1	116.898	-8.36248	0.216375	-38.6481	0	0
DEK	7471.42	-0.81783	0.018333	-44.6096	0	0
DENND1B	8726.04	-1.87284	0.0313922	-59.6593	0	0
DENND3	1162.97	-2.17402	0.0437293	-49.7154	0	0
DENND5A	8498.43	-3.26811	0.034422	-94.9426	0	0
DEPDC7	999.888	-5.62659	0.087311	-64.4431	0	0
DERA	572.526	0.869892	0.0191946	45.3197	0	0
DGCR2	604.387	1.24988	0.028687	43.5696	0	0
DHRSX	4569.71	-1.20754	0.0255275	-47.3035	0	0
DHX32	342.741	1.37374	0.0274101	50.1181	0	0
DHX58	5714.87	-3.16319	0.0292282	-108.224	0	0
DL490867	134.92	-4.71709	0.0985263	-47.8765	0	0
DNAJA1	11771.4	-1.71611	0.0145698	-117.786	0	0
DNAJA2	2169.47	-1.49078	0.0385962	-38.6249	0	0
DNAJB4	7007.8	-5.5569	0.0507286	-109.542	0	0
DNAJB5	527.024	-2.52741	0.0593646	-42.5743	0	0
DNAJC6	488.144	-3.8724	0.0791947	-48.8972	0	0
DNAJC7	3739.16	-0.79075	0.00932495	-84.7993	0	0
DOCK2	5248.51	0.711177	0.0174533	40.7475	0	0
DOCK8	10216.3	-1.70525	0.0263163	-64.7982	0	0
DOK3	460.612	3.18588	0.0699023	45.5763	0	0
DPAGT1	406.387	0.975262	0.023825	40.9343	0	0
DPH1	399.603	0.661091	0.0169994	38.8891	0	0
DPP8	1048.03	0.578189	0.0140187	41.244	0	0
DRAP1	1625.85	-0.870924	0.0206645	-42.146	0	0
DSP	362.908	-5.98157	0.126577	-47.2563	0	0
DTX3L	11631.9	-2.50821	0.0206223	-121.626	0	0
DUOXA1	364.122	2.40654	0.0603335	39.8873	0	0
DUSP1	2393.54	-3.45562	0.061359	-56.318	0	0
DUSP2	4735.6	-6.14477	0.0748255	-82.1213	0	0
DUSP5	9086.45	-3.88152	0.0533815	-72.7129	0	0
DUSP7	138.914	2.13881	0.0462901	46.2045	0	0
DYNLT1	3822.57	-2.73486	0.0241409	-113.288	0	0
DYRK2	502.725	1.46347	0.0385059	38.0064	0	0
EDARADD	184.665	-3.8403	0.0938642	-40.9133	0	0
EDC4	851.614	0.856752	0.0193065	44.3764	0	0
EDN1	241.354	-7.29572	0.147933	-49.3178	0	0
EFCAB14	3453.01	0.484607	0.0112557	43.0543	0	0
EFR3A	5326.15	-0.932195	0.0185353	-50.2931	0	0
EGR1	7597.62	-7.71005	0.0900196	-85.6485	0	0
EGR3	1752.24	-7.09014	0.108032	-65.6298	0	0
EGR4	461.913	-6.75641	0.0980923	-68.8781	0	0
EHD4	9929.85	-1.50689	0.0246935	-61.0239	0	0
EHMT2	504.58	1.69757	0.0405575	41.856	0	0
EIF2AK2	10204.9	-2.90284	0.0250576	-115.847	0	0
EIF2B4	361.395	1.01467	0.0188425	53.8501	0	0
EIF3G	1654.38	1.43196	0.028173	50.8276	0	0
EIF4EBP2	1446.86	0.998677	0.0222111	44.963	0	0
ELF1	7961.7	-1.83488	0.0251841	-72.8586	0	0
ELF4	3066.53	-0.881934	0.0155581	-56.6864	0	0
ELL2	1833.68	-1.92356	0.0462294	-41.609	0	0
ELMO2	1962.2	-1.47494	0.0176358	-83.6332	0	0
ELOVL7	942.057	-3.34128	0.0581732	-57.4368	0	0
ENDOD1	952.478	-2.41794	0.050327	-48.0446	0	0
ENGASE	345.217	1.81293	0.0425283	42.6288	0	0
ENKD1	41.6366	1.28601	0.0247085	52.0472	0	0
ENOX2	146.965	0.489255	0.0122086	40.0747	0	0
ENTPD4	937.095	1.17371	0.024225	48.4502	0	0
ENTPD5	641.398	-1.55482	0.0345179	-45.044	0	0
EPB41L5	228.308	-2.75716	0.0439845	-62.6849	0	0
EPC1	847.349	-0.980397	0.0246949	-39.7004	0	0
EPC2	837.194	-1.12506	0.0273717	-41.103	0	0
EPHB2	1030.89	-3.23322	0.0487634	-66.3042	0	0
EPN1	703.043	1.0994	0.028064	39.1748	0	0
EPS15L1	319.523	0.853795	0.0209813	40.6932	0	0
EPSTI1	11157.5	-4.1001	0.0375181	-109.283	0	0
EPT1	1313.74	-1.73217	0.0332533	-52.0902	0	0
EREG	2101.75	-6.26884	0.0723801	-86.6099	0	0
ERI3	163.19	1.42202	0.0343006	41.4577	0	0
ERICH1	1841.43	-3.18264	0.0431682	-73.7264	0	0
ERN1	1483.97	-2.1893	0.0405963	-53.9285	0	0
ERP44	3809.67	-1.17792	0.0218387	-53.9373	0	0
ERRFI1	431.919	-2.94254	0.0754046	-39.0234	0	0
ESRRA	219.769	1.53846	0.0320407	48.0159	0	0
ETNK1	2819.58	-0.837986	0.0170808	-49.0602	0	0
ETV6	506.036	-4.90384	0.0823772	-59.5291	0	0
ETV7	1131.77	-5.60873	0.0441649	-126.995	0	0
EWSR1	4506.13	-0.700427	0.0135901	-51.5394	0	0
EXOC3	587.761	1.0558	0.0231248	45.6564	0	0
EXOC3L1	124.168	-5.51836	0.102773	-53.6944	0	0
EXOSC9	1370.51	-2.78239	0.0499543	-55.6988	0	0
EXT1	1805.79	-3.99155	0.0543357	-73.4608	0	0
EZH2	2934.81	-3.09487	0.058456	-52.9437	0	0
F3	550.472	-3.90851	0.074695	-52.3263	0	0
FAM111A	2088.11	-1.24697	0.0327013	-38.132	0	0
FAM122C	214.105	-1.73732	0.0257744	-67.4049	0	0
FAM129A	17949.4	-1.8875	0.0320058	-58.9736	0	0
FAM134A	1765.1	1.14626	0.0203118	56.4333	0	0
FAM135A	1347.44	-2.77054	0.0429448	-64.514	0	0
FAM156A	310.125	1.55855	0.0327778	47.5489	0	0
FAM160B2	435.625	1.19931	0.0264407	45.3584	0	0
FAM168B	1372.79	1.24423	0.0283989	43.8126	0	0
FAM177A1	2357.88	-2.95379	0.0346113	-85.3417	0	0
FAM199X	830.205	1.07151	0.0174576	61.378	0	0
FAM208B	3891.87	-2.90464	0.0412389	-70.4345	0	0
FAM213B	234.878	1.9322	0.0487489	39.6356	0	0
FAM219B	395.868	1.07735	0.0269122	40.032	0	0
FAM26F	3010.82	-4.75346	0.0905526	-52.4939	0	0
FAM43A	1038.85	-6.05732	0.0891967	-67.9097	0	0
FAM46A	6887.68	-3.44155	0.0426886	-80.6199	0	0
FAM53C	1779.65	-1.3537	0.0306653	-44.1442	0	0
FAM65B	2308.58	-6.12008	0.068514	-89.3259	0	0
FAM72A	233.998	-2.55359	0.0402988	-63.3664	0	0
FAM72B	282.602	-2.22118	0.0338979	-65.5256	0	0
FAM76B	593.692	-1.49863	0.0243183	-61.6254	0	0
FAS	1047.89	-2.23462	0.0400156	-55.8437	0	0
FASTKD1	334.142	1.4235	0.0320373	44.4325	0	0
FBXO6	1590.72	-1.20613	0.0257806	-46.7843	0	0
FBXO7	4761.35	-1.06903	0.0130473	-81.9356	0	0
FBXW2	1148.64	0.8634	0.0208982	41.3145	0	0
FEM1C	2196.14	-2.64326	0.0356606	-74.1226	0	0
FES	1136.8	3.14492	0.0638122	49.284	0	0
FFAR2	146.409	-4.32118	0.0960538	-44.987	0	0
FKBP6	6139.37	-3.41658	0.076341	-44.7542	0	0
FLYWCH1	275.382	1.92365	0.0412269	46.6601	0	0
FMR1	1927.93	-1.64232	0.0224411	-73.1833	0	0
FNBP4	2585.31	-2.68935	0.0383896	-70.054	0	0
FNDC3A	4845.71	-2.46707	0.038334	-64.3572	0	0
FOS	1445.1	-5.01994	0.126771	-39.5986	0	0
FOSB	233.203	-7.24002	0.10398	-69.6291	0	0
FOXC1	674.572	-7.49217	0.0872784	-85.8421	0	0
FOXK2	686.629	0.701688	0.0185192	37.8899	0	0
FOXQ1	443.143	3.42733	0.0912782	37.5482	0	0
FRMD3	1136.78	-7.43124	0.0725978	-102.362	0	0
FRMD8	644.702	1.10801	0.0291507	38.0096	0	0
FRYL	2237.92	-0.801556	0.0183526	-43.6754	0	0
FTSJ2	402.358	1.62984	0.0314824	51.7699	0	0
FTSJD2	3390.22	-1.67239	0.0171966	-97.2515	0	0
FUBP1	1882.06	-1.32829	0.0258011	-51.4818	0	0
FUBP3	684.811	0.759651	0.0152369	49.856	0	0
FXYD6-FXYD2	826.293	-4.70994	0.0712229	-66.1295	0	0
FYTTD1	3895.38	-1.33525	0.019061	-70.0515	0	0
FZD4	1255.99	-8.02978	0.0875394	-91.7276	0	0
GABARAP	4376.87	0.620852	0.0163877	37.8852	0	0
GABPA	749.188	0.748602	0.0190539	39.2886	0	0
GABPB1	619.466	-1.2382	0.0260024	-47.6189	0	0
GADD45B	3741.91	-3.85563	0.056459	-68.2907	0	0
GALNT3	477.172	-4.8081	0.0604601	-79.5252	0	0
GAPVD1	1053.79	0.685248	0.0133375	51.3774	0	0
GBA2	530.365	0.927681	0.0195732	47.3955	0	0
GBP1	27390.9	-6.2853	0.0522784	-120.227	0	0
GBP1P1	927.501	-7.13088	0.0676841	-105.355	0	0
GBP2	4902.76	-3.51145	0.0385878	-90.999	0	0
GBP3	3047.7	-3.21323	0.0817153	-39.3222	0	0
GBP4	14038	-7.4017	0.054275	-136.374	0	0
GBP5	14615.2	-6.24579	0.0540675	-115.518	0	0
GBP7	3730.95	-8.1181	0.0801934	-101.232	0	0
GCH1	6970.63	-6.37664	0.0665642	-95.7968	0	0
GCLC	3647.01	-3.01293	0.0502957	-59.9044	0	0
GDE1	1273.17	1.28048	0.0289558	44.2218	0	0
GEM	220.985	-5.56758	0.130024	-42.8196	0	0
GFM1	831.286	1.01934	0.0260662	39.1059	0	0
GGA1	636.754	1.12128	0.0258466	43.3822	0	0
GGA2	1475.94	2.11191	0.0411837	51.2804	0	0
GGA3	866.172	0.813532	0.0167794	48.4841	0	0
GID8	751.501	0.932201	0.0230405	40.4593	0	0
GIGYF1	304.297	1.247	0.032305	38.6007	0	0
GIPC1	452.605	1.16756	0.0309155	37.766	0	0
GIT1	599.436	1.54274	0.0306293	50.3679	0	0
GIT2	1984	0.898585	0.0171306	52.455	0	0
GLCCI1	455.272	-3.6576	0.0623338	-58.6777	0	0
GLOD4	548.674	1.12752	0.0246219	45.7933	0	0
GLRX	5620.83	-2.05924	0.036275	-56.7675	0	0
GLT8D1	293.01	1.61677	0.0243488	66.4005	0	0
GLYR1	1768.88	0.690276	0.0122544	56.3288	0	0
GMPR	1935.25	-5.64432	0.0513761	-109.863	0	0
GNA13	11729.2	-2.45806	0.0338284	-72.6627	0	0
GNG5	1734.94	-0.731662	0.0173629	-42.1394	0	0
GNPDA1	1171.77	2.44063	0.048208	50.627	0	0
GOLGA3	1039.87	0.861945	0.0223836	38.5079	0	0
GOLIM4	680.609	1.22521	0.0240759	50.8895	0	0
GOLM1	2907.57	-1.52256	0.0342819	-44.4128	0	0
GOLPH3	2774.87	-1.23209	0.025554	-48.2153	0	0
GOPC	1353.06	-1.20492	0.0270429	-44.5559	0	0
GOT1	253.241	1.80203	0.0403057	44.709	0	0
GPBP1	4622.87	-2.30936	0.0242134	-95.3755	0	0
GPD2	5187.8	-2.52221	0.0291921	-86.4003	0	0
GPR180	1285.62	-2.45028	0.0250834	-97.6853	0	0
GRAMD4	514.661	2.48514	0.057617	43.1321	0	0
GRB10	958.632	-3.48667	0.0641759	-54.3299	0	0
GREB1L	135.891	-5.8421	0.103078	-56.6765	0	0
GRIN3A	986.583	-3.9561	0.068037	-58.1463	0	0
GRIPAP1	2090.67	-0.819523	0.0195749	-41.8661	0	0
GSDMD	1358.02	-1.11892	0.0289102	-38.7031	0	0
GTF2B	1979.84	-1.22959	0.0260429	-47.2138	0	0
GTF2F1	1968.03	-0.658662	0.0171146	-38.4855	0	0
GTF3C2	795.03	1.42156	0.0214325	66.3276	0	0
GTPBP1	3573.47	-2.8899	0.0243648	-118.61	0	0
GTPBP2	1903.69	-1.23352	0.0182172	-67.7119	0	0
GUCY1A3	257.144	-3.53075	0.0841904	-41.9377	0	0
GVINP1	662.713	-2.27565	0.0540133	-42.1314	0	0
H3F3B	15801.4	-1.40435	0.0223286	-62.8948	0	0
HAGH	668.788	1.25404	0.0294269	42.6154	0	0
HAPLN3	1119.19	-2.87033	0.0569869	-50.3681	0	0
HARS	1842.61	-2.0249	0.0485381	-41.7177	0	0
HBP1	3961.94	-1.77019	0.033564	-52.7407	0	0
HDAC3	858.291	1.14205	0.0241142	47.3602	0	0
HDAC5	343.41	1.95617	0.0438352	44.6256	0	0
HECTD1	1755.73	0.961302	0.0178549	53.8397	0	0
HECTD3	668.817	0.991204	0.0245572	40.363	0	0
HEG1	3821.99	-2.48176	0.0604176	-41.0767	0	0
HELZ2	11544.6	-3.74421	0.0366289	-102.22	0	0
HEMK1	186.029	1.37246	0.0329488	41.6543	0	0
HERC5	26562	-7.1004	0.0601085	-118.126	0	0
HERC6	4912.58	-4.63252	0.0418589	-110.67	0	0
HES4	691.957	-8.46623	0.0991801	-85.3622	0	0
HESX1	1119	-6.28661	0.0464659	-135.295	0	0
HGSNAT	1906.15	1.14617	0.0256375	44.7068	0	0
HIAT1	8533.66	-3.61466	0.0405789	-89.0775	0	0
HIF1AN	993.904	0.838075	0.0167187	50.128	0	0
HIPK1	2632.03	0.662911	0.0141273	46.9242	0	0
HIPK3	5367.73	-1.20853	0.0292752	-41.2818	0	0
HIRA	2354.44	-1.11816	0.0112758	-99.1638	0	0
HIST2H2BE	429.2	-2.67774	0.0512361	-52.2627	0	0
HIST2H2BF	354.009	-3.49315	0.0647	-53.99	0	0
HIST2H4A	640.737	-3.52452	0.0449307	-78.4435	0	0
HIVEP1	1103.18	-2.2641	0.050082	-45.2079	0	0
HIVEP2	2056.93	-4.16276	0.0469755	-88.6154	0	0
HK2	5716.55	-3.00136	0.0481938	-62.2769	0	0
HLA-DOB	244.031	-3.74552	0.0933777	-40.1115	0	0
HLA-E	31093.9	-0.926924	0.0246952	-37.5346	0	0
HLA-F	1282.95	-2.21528	0.0391622	-56.5668	0	0
HLA-G	35002.2	-1.5252	0.0324558	-46.9932	0	0
HMGCL	545.572	1.0378	0.0226539	45.811	0	0
HNRNPA2B1	17119.7	-0.840161	0.0190191	-44.1746	0	0
HNRPLL	1751.77	-1.91166	0.0349684	-54.6682	0	0
HP1BP3	1714.78	0.932731	0.0234857	39.7149	0	0
HPS3	723.604	1.30691	0.0343998	37.9918	0	0
HS2ST1	761.177	2.29786	0.0432546	53.1241	0	0
HS3ST3B1	1822.56	-5.17467	0.0757541	-68.3087	0	0
HSBP1	952.706	0.732514	0.0148174	49.4361	0	0
HSCB	212.038	-1.95025	0.0390501	-49.9423	0	0
HSD17B4	2033.26	0.944265	0.0238986	39.5114	0	0
HSH2D	7347.66	-1.35609	0.0202135	-67.0883	0	0
HUS1	355.054	-0.828967	0.0198377	-41.7875	0	0
HYAL2	349.573	2.02469	0.0299091	67.6947	0	0
ICMT	745.382	1.73102	0.0402272	43.0312	0	0
IDO1	13139.7	-7.13844	0.0981385	-72.7385	0	0
IDO2	89.1143	-5.43637	0.130225	-41.7459	0	0
IER2	5353.62	-5.63701	0.0564991	-99.7718	0	0
IFFO1	597.474	1.46479	0.0328822	44.5466	0	0
IFI16	15109.7	-1.13126	0.0264371	-42.7906	0	0
IFI27	4208.29	-4.57909	0.0821637	-55.7314	0	0
IFI35	6584.75	-2.3651	0.0227783	-103.831	0	0
IFI44	682.976	-3.35219	0.0484975	-69.121	0	0
IFI44L	15135.3	-4.56641	0.0535451	-85.2816	0	0
IFI6	10898.7	-3.89309	0.0456197	-85.338	0	0
IFIH1	37663.6	-5.38715	0.0428413	-125.747	0	0
IFIT1	33915.9	-6.37048	0.118255	-53.8707	0	0
IFIT2	14198.7	-7.18119	0.0512238	-140.192	0	0
IFIT3	20519.1	-7.30862	0.0754595	-96.8549	0	0
IFIT5	4234.76	-3.68984	0.041686	-88.5152	0	0
IFITM1	7111.15	-6.16288	0.0611259	-100.823	0	0
IFITM3	10610.4	-3.26204	0.0523498	-62.3125	0	0
IFNA13	4625.75	-14.3744	0.307249	-46.7841	0	0
IFNA14	1573.28	-13.9051	0.328456	-42.3346	0	0
IFNA2	9430.5	-13.9329	0.266889	-52.2047	0	0
IFNA21	609.773	-12.5695	0.303303	-41.4421	0	0
IFNA22P	1053.02	-13.605	0.315248	-43.1566	0	0
IFNA5	514.061	-12.7431	0.332638	-38.3091	0	0
IFNB1	21126.9	-13.2639	0.223388	-59.376	0	0
IFNGR1	2936.3	1.70523	0.0337706	50.4945	0	0
IFNL1	20263.7	-13.6434	0.229836	-59.3612	0	0
IFNL2	2241.11	-13.5051	0.27035	-49.9542	0	0
IFNL3	980.073	-13.5549	0.337891	-40.1163	0	0
IFNL4	2664.57	-10.5696	0.116177	-90.9781	0	0
IFNW1	5413.13	-13.2133	0.216522	-61.0252	0	0
IFRD1	907.703	-2.45501	0.0423801	-57.9284	0	0
IGF2	800.581	-9.86332	0.140651	-70.1263	0	0
IKBKB	1034.64	0.796697	0.0177964	44.7673	0	0
IKBKE	1600.29	-2.82481	0.0515187	-54.8307	0	0
IKZF1	3859.12	-1.29807	0.0337654	-38.4437	0	0
IL10RA	36381.6	-2.75598	0.0358777	-76.8159	0	0
IL12A	652.036	-10.2569	0.166698	-61.53	0	0
IL15	849.24	-3.99507	0.0426127	-93.7531	0	0
IL15RA	1817.55	-5.21755	0.0585694	-89.0833	0	0
IL1A	1493.36	-6.26305	0.149166	-41.987	0	0
IL1RN	36364.8	-4.02329	0.0636011	-63.2581	0	0
IL4I1	23147.7	-2.58654	0.0523838	-49.3768	0	0
IL6	4585.32	-7.52186	0.12702	-59.218	0	0
ILVBL	218.485	1.63615	0.0386954	42.2827	0	0
IMPACT	564.423	1.35263	0.0269841	50.1269	0	0
IMPDH1	1651.96	1.41061	0.0358145	39.3865	0	0
ING4	207.048	1.49512	0.0322378	46.3779	0	0
INIP	579.711	0.956318	0.0238369	40.1193	0	0
INO80D	1102.62	-1.37572	0.0257331	-53.4609	0	0
INPPL1	1699.74	1.03248	0.0246602	41.8682	0	0
INTS12	457.245	-0.945056	0.0205707	-45.9418	0	0
INTS6	1576.7	-1.65435	0.0346083	-47.8021	0	0
INTS9	383.703	0.760215	0.0200863	37.8474	0	0
IPO13	392.356	1.49379	0.0295803	50.4996	0	0
IPO8	950.255	0.987248	0.0200927	49.1345	0	0
IRAK2	2352.02	-5.21021	0.0894959	-58.2173	0	0
IRF1	7442.14	-3.82594	0.0338093	-113.162	0	0
IRF2	4548.24	-1.92354	0.0237424	-81.017	0	0
IRF7	4222.55	-4.10257	0.0367041	-111.774	0	0
IRF8	2949.66	-2.29869	0.0518764	-44.3109	0	0
IRG1	739.378	-9.57836	0.174008	-55.0454	0	0
ISG15	39546.3	-7.26547	0.0678325	-107.109	0	0
ISG20	5962.57	-7.44869	0.0422226	-176.415	0	0
ITPRIP	1181.49	-2.31102	0.0370947	-62.3005	0	0
IVD	452.684	1.59668	0.0405281	39.397	0	0
JAG1	5177.04	-2.34232	0.0514129	-45.5591	0	0
JAK2	5782.96	-2.09316	0.025677	-81.5189	0	0
JMJD1C	2446.53	-1.67849	0.040916	-41.0229	0	0
JUN	8443.05	-3.43551	0.0751782	-45.6983	0	0
JUP	5397.94	-2.48123	0.0530732	-46.7511	0	0
KARS	5084.96	-1.13065	0.0158548	-71.3127	0	0
KAT2B	2900.9	-2.36284	0.0371068	-63.6768	0	0
KAT8	529.499	1.33081	0.0223337	59.5873	0	0
KCNA3	552.591	-4.52688	0.110193	-41.0815	0	0
KCNJ2	3603.39	-3.96389	0.0789639	-50.1988	0	0
KCNK6	1918.04	1.51461	0.039324	38.5162	0	0
KCTD2	421.437	1.35964	0.0287993	47.2109	0	0
KCTD20	2122.33	0.914788	0.0168479	54.297	0	0
KCTD6	103.827	1.67908	0.0299759	56.0144	0	0
KDELC2	1012.48	-2.40273	0.042711	-56.2556	0	0
KDM2A	3951.19	-0.692284	0.0162943	-42.4863	0	0
KDM3B	2092.89	0.661099	0.0147299	44.8814	0	0
KDM6A	3086.07	-2.9936	0.0597794	-50.0774	0	0
KHDRBS1	2918.78	-0.583293	0.0146834	-39.7248	0	0
KHSRP	1872.77	0.910187	0.023849	38.1645	0	0
KIAA0040	5898.62	-2.69315	0.0229853	-117.168	0	0
KIAA0141	584.023	1.38147	0.0274072	50.4053	0	0
KIAA0195	697.989	1.13489	0.0233077	48.6917	0	0
KIAA0196	1205.27	1.02516	0.018866	54.3389	0	0
KIAA0226	3931.37	-1.86856	0.0209087	-89.3679	0	0
KIAA0232	873.958	1.48149	0.0235616	62.8773	0	0
KIAA1033	6319.33	-1.27056	0.0240584	-52.8114	0	0
KIAA1109	3270.09	-1.03027	0.0242935	-42.4091	0	0
KIAA1143	432.38	1.19314	0.0311438	38.3107	0	0
KIAA1429	848.622	0.601384	0.0159732	37.6496	0	0
KIAA1737	573.696	1.42704	0.0344017	41.4816	0	0
KIAA2013	865.177	0.968826	0.0224012	43.2488	0	0
KLC1	1609.96	0.485964	0.012706	38.2467	0	0
KLF4	4785.57	-2.88512	0.0719663	-40.0899	0	0
KLF6	29562.3	-3.33825	0.0404793	-82.468	0	0
KLF9	894.845	-2.49267	0.0568746	-43.8275	0	0
KLHDC2	402.233	1.02409	0.0218294	46.9135	0	0
KLHDC3	849.843	1.94259	0.0312923	62.0789	0	0
KLHL12	816.393	1.15236	0.0161103	71.5293	0	0
KLHL22	229.508	2.01551	0.0375171	53.7225	0	0
KLHL36	700.402	1.3885	0.0299825	46.3102	0	0
KLHL6	1867.38	-1.3094	0.033456	-39.1381	0	0
KPNA1	2347.93	-0.842524	0.0208112	-40.4842	0	0
KPNB1	10344.9	-1.18376	0.0149438	-79.2138	0	0
KYNU	6462.94	-2.58454	0.0461075	-56.0545	0	0
LAG3	1854.14	-6.97353	0.0644763	-108.157	0	0
LAMA2	357.636	-6.57418	0.10395	-63.2439	0	0
LAMA3	461.551	-5.38071	0.115732	-46.4929	0	0
LAMTOR1	1291.87	1.2137	0.0246791	49.1791	0	0
LAMTOR4	580.972	0.947149	0.0212072	44.6616	0	0
LAMTOR5	634.532	0.821522	0.0176936	46.4304	0	0
LAP3	19318.5	-2.51438	0.030403	-82.7017	0	0
LARP4B	2497.99	-0.655153	0.0161378	-40.5975	0	0
LASP1	4602.21	0.946644	0.0231282	40.9303	0	0
LATS1	1233.84	-0.612939	0.0148368	-41.3121	0	0
LATS2	2224.06	-2.51929	0.0379728	-66.3446	0	0
LCP2	10729.9	-2.26155	0.0449012	-50.3671	0	0
LDB1	848.564	1.5954	0.0404759	39.416	0	0
LDHAL6B	134.579	-4.22787	0.085512	-49.4418	0	0
LGALS3BP	6325.45	-2.34311	0.0426144	-54.9841	0	0
LGALS9	10913.6	-2.18037	0.0201372	-108.276	0	0
LIG1	163.639	-4.72968	0.0797063	-59.3389	0	0
LINC00158	149	-3.33602	0.0692243	-48.1914	0	0
LINC00623	101.224	-1.99943	0.0478518	-41.7837	0	0
LIPA	367910	-2.89799	0.0430497	-67.3173	0	0
LOC100288255	288.384	-9.87376	0.228359	-43.2378	0	0
LOC100505876	438.09	1.43997	0.0240994	59.7514	0	0
LOC344887	510.298	-2.87579	0.0763985	-37.642	0	0
LOC401074	408.349	-3.52249	0.075546	-46.6271	0	0
LOC440896	598.802	-5.70231	0.124794	-45.6936	0	0
LOC541471	537.193	-4.22674	0.101644	-41.5836	0	0
LPIN2	3043.72	-1.66492	0.0398604	-41.7687	0	0
LRCH1	1359.88	-1.7241	0.0323306	-53.3273	0	0
LRFN4	164.784	2.35125	0.0484627	48.5167	0	0
LRRC25	152.882	5.15127	0.113425	45.4159	0	0
LRRC41	838.077	0.804096	0.015584	51.5977	0	0
LRRC47	349.393	0.97027	0.0209852	46.2359	0	0
LRRC8A	281.909	1.2469	0.0322099	38.7118	0	0
LSM14B	461.019	1.10136	0.0193335	56.9664	0	0
LTA4H	650.94	1.59762	0.03791	42.1426	0	0
LUZP6	6879.26	-0.911887	0.0190876	-47.7739	0	0
LY6E	7517.82	-3.14794	0.0397124	-79.2684	0	0
LYN	14167.4	-2.19451	0.0292675	-74.9809	0	0
LYPLA2	681.679	0.886975	0.018085	49.0447	0	0
LZTR1	524.907	0.797306	0.0208748	38.1947	0	0
MAD2L1BP	569.439	-0.674427	0.0157905	-42.711	0	0
MAEA	591.279	1.52008	0.025965	58.5434	0	0
MAF1	822.28	0.970705	0.0195118	49.7496	0	0
MAML2	3243.3	-2.35359	0.0248921	-94.5514	0	0
MAP2K3	2225.15	-2.54168	0.0438901	-57.9101	0	0
MAP3K3	839.355	2.25125	0.0379417	59.3344	0	0
MAP3K5	930.421	1.51591	0.0399769	37.9198	0	0
MAP3K8	4813.18	-3.05766	0.0554171	-55.1754	0	0
MAP4K4	4207.76	-1.87143	0.04652	-40.2285	0	0
MAPK1	3702.06	0.759669	0.0195303	38.897	0	0
MAPK14	1372.42	0.893161	0.0170094	52.5099	0	0
MAPKAPK3	2859.56	1.18994	0.0305283	38.9782	0	0
2018-03-06	1680.16	0.610671	0.0155018	39.3934	0	0
2018-03-08	844.491	1.49615	0.0372544	40.1604	0	0
MAST3	190.913	1.82442	0.045795	39.8389	0	0
MASTL	2219.59	-3.6655	0.029987	-122.236	0	0
MAVS	1443.75	0.893266	0.0215131	41.522	0	0
MB	39.3555	-3.20087	0.0850697	-37.6264	0	0
MB21D1	2174.13	-2.7112	0.0275377	-98.4542	0	0
MBNL1	14162.8	-1.44719	0.0257941	-56.1055	0	0
MBTPS1	1202.54	0.828228	0.0207732	39.8701	0	0
MCL1	15355.7	-1.65417	0.0200937	-82.323	0	0
MCMBP	2453.79	-1.06929	0.0226283	-47.2546	0	0
MCOLN2	3139.57	-3.18721	0.0492963	-64.6541	0	0
MDFIC	1191.57	0.987257	0.0249895	39.5068	0	0
MDM2	6112.88	-2.68764	0.064974	-41.3649	0	0
MED13	4797.37	-1.383	0.0195488	-70.7461	0	0
MED13L	3090.58	-1.17177	0.0253684	-46.1901	0	0
MED25	2232.2	-0.771053	0.018943	-40.7038	0	0
MED26	1205.17	0.525414	0.0136103	38.6041	0	0
MED8	502.891	0.58685	0.0151758	38.6701	0	0
MEF2A	3056.49	-1.53747	0.025653	-59.9336	0	0
MELK	239.934	-1.9124	0.0505042	-37.8662	0	0
METTL16	287.017	1.13431	0.0279782	40.5428	0	0
METTL23	213.732	0.886302	0.0194749	45.51	0	0
MEX3C	1130.52	-1.42949	0.0351939	-40.6176	0	0
MFF	458.623	0.946215	0.0223353	42.364	0	0
MFN1	1496.3	-1.57903	0.0333176	-47.3934	0	0
MFSD5	416.601	1.09653	0.0276728	39.625	0	0
MGST2	296.029	1.82709	0.0376112	48.5783	0	0
MIA3	4598.61	-1.7776	0.0209969	-84.6601	0	0
MICB	1318.4	-2.00767	0.0268654	-74.7308	0	0
MIER1	1709.34	-1.28517	0.0157638	-81.5266	0	0
MINK1	1750.7	1.73907	0.0351972	49.4094	0	0
MIR155HG	3185.87	-7.17257	0.0899411	-79.7474	0	0
MIR31HG	327.373	-5.81734	0.0864152	-67.3184	0	0
MIR548N	1893.8	-1.00685	0.0175033	-57.5236	0	0
MIR5696	190.442	-5.14985	0.077272	-66.6458	0	0
MITF	1900.07	-2.63985	0.0573145	-46.059	0	0
MLEC	3889.26	1.36102	0.0321345	42.354	0	0
MLLT1	438.751	1.21674	0.0292348	41.6197	0	0
MLXIP	1269.1	1.92049	0.0352308	54.5116	0	0
MMS19	620.951	1.31992	0.0279992	47.1414	0	0
MNDA	7189.52	-2.26814	0.0455689	-49.7739	0	0
MOAP1	280.867	1.3008	0.025775	50.4675	0	0
MOB4	788.301	-0.690516	0.0174136	-39.6539	0	0
MOGS	687.454	1.07819	0.0239033	45.1065	0	0
MORC3	2547.63	-1.17981	0.0186859	-63.1392	0	0
MORF4L1	3635.35	0.760954	0.0156618	48.5866	0	0
MOV10	4343.7	-2.72627	0.0233949	-116.533	0	0
MPG	307.618	1.29167	0.033604	38.438	0	0
MPV17	867.681	0.749709	0.0187532	39.9777	0	0
MPV17L2	124.419	1.27662	0.0316917	40.2825	0	0
MRFAP1L1	465.675	1.47792	0.0284509	51.9463	0	0
MRPL15	449.329	1.3603	0.0338758	40.1556	0	0
MRPL17	604.976	-1.05103	0.0194474	-54.0449	0	0
MRPL32	1009.18	-1.67856	0.0251366	-66.7776	0	0
MRPL34	260.162	1.60176	0.0335177	47.7885	0	0
MRPL35	364.131	1.39044	0.0323723	42.9514	0	0
MRPL39	967.963	-2.79414	0.0465085	-60.0781	0	0
MRPL40	1056.19	-1.78912	0.0323591	-55.2895	0	0
MRPL43	226.7	1.17673	0.0258297	45.5573	0	0
MRPL55	71.2343	1.47323	0.0378808	38.8912	0	0
MRPS16	57.3687	0.813274	0.0203632	39.9383	0	0
MRPS18B	455.553	1.07704	0.027432	39.2621	0	0
MRPS23	333.923	1.07717	0.0272094	39.588	0	0
MSANTD4	937.539	-1.45994	0.0315623	-46.2559	0	0
MSC	2212.55	-2.70479	0.0708095	-38.1981	0	0
MSX1	142.275	-7.30671	0.124547	-58.6665	0	0
MT1A	1980.43	-5.67226	0.0599983	-94.5403	0	0
MTFMT	134.454	2.23707	0.0464727	48.1372	0	0
MTFR1L	398.565	1.02556	0.0145203	70.6291	0	0
MTG2	342.634	0.720134	0.0154682	46.5556	0	0
MTHFD2	6071.57	-1.27013	0.0292803	-43.3782	0	0
MTIF3	326.584	0.755122	0.0196223	38.4828	0	0
MTOR	1018.65	0.800889	0.0195479	40.9707	0	0
MTRF1	88.6077	0.606416	0.0160231	37.8464	0	0
MX1	65056.1	-5.33214	0.0570061	-93.5363	0	0
MX2	22260.3	-4.71207	0.0486804	-96.796	0	0
MXD1	9630.41	-3.63883	0.0454177	-80.1191	0	0
MXD4	299.38	2.8729	0.0567979	50.5811	0	0
MYCBP2	6169.04	-1.7564	0.0221445	-79.3153	0	0
MYCL1	256.92	3.25218	0.0705676	46.086	0	0
MYD88	6022.44	-2.39432	0.0237037	-101.01	0	0
MYL12A	17011.1	-1.12909	0.018535	-60.9169	0	0
MYLIP	1027.16	-2.11095	0.0459781	-45.912	0	0
MYLK3	328.439	-4.69643	0.0996563	-47.1263	0	0
MYO1A	321.768	-4.27927	0.0732834	-58.3934	0	0
MYO1F	2943.06	0.951037	0.021669	43.8894	0	0
MYO9A	481.701	1.01382	0.0241578	41.9664	0	0
MYOF	13027.5	-3.09977	0.0605401	-51.2019	0	0
NAGK	5486.24	-1.37829	0.0314498	-43.8251	0	0
NAMPT	23597.7	-3.55211	0.0448167	-79.2586	0	0
NANOGP1	91.3249	-4.52383	0.107766	-41.9782	0	0
NAPA	4228.84	-1.38883	0.0164836	-84.2556	0	0
NARS	2224.93	1.22348	0.0248657	49.2034	0	0
NAT1	466.454	-2.06498	0.0465147	-44.3942	0	0
NAT9	179.393	1.31679	0.0246845	53.3448	0	0
NAV2	308.33	-5.17848	0.0902486	-57.3801	0	0
NBN	7017.49	-3.59182	0.0494534	-72.6304	0	0
NCBP1	922.116	0.69415	0.0179411	38.6905	0	0
NCBP2	930.284	0.892609	0.0170505	52.3511	0	0
NCF1	11238.1	-4.48862	0.0786381	-57.0795	0	0
NCF1C	4312.75	-4.38043	0.0796501	-54.9959	0	0
NCOA1	3696.12	-1.54164	0.0248038	-62.1537	0	0
NCOA7	5621.21	-4.65958	0.0437614	-106.477	0	0
NDEL1	885.379	-0.943496	0.0237125	-39.7889	0	0
NDUFA8	334.523	1.00975	0.025329	39.8653	0	0
NDUFS2	1234.18	0.895222	0.0218058	41.0543	0	0
NEDD1	1731.63	-2.80573	0.03847	-72.9331	0	0
NEDD9	2591.7	-8.26133	0.120044	-68.8192	0	0
NEIL2	74.446	1.69171	0.0406473	41.6193	0	0
NEK9	1130.29	1.20562	0.0260717	46.2425	0	0
NETO2	2032.74	-2.46997	0.0610601	-40.4515	0	0
NEURL3	804.062	-5.53325	0.119631	-46.2526	0	0
NEXN	1028.2	-7.02686	0.0765764	-91.7628	0	0
NFE2L2	7390.85	-1.57622	0.0274464	-57.429	0	0
NFE2L3	1137.13	-3.48725	0.0722153	-48.2896	0	0
NFIX	472.208	-4.06307	0.0541489	-75.0352	0	0
NFKB1	9620.4	-2.77998	0.0566416	-49.0802	0	0
NFKBIA	22597	-3.54861	0.0700735	-50.6413	0	0
NFKBIZ	4036.2	-5.07066	0.0779434	-65.0556	0	0
NINJ1	6774.32	-2.66221	0.062345	-42.7013	0	0
NISCH	1392.14	2.1597	0.051689	41.7826	0	0
NKX3-1	84.2748	-6.15935	0.133944	-45.9846	0	0
NLRC5	3266.07	-2.61144	0.0277058	-94.2558	0	0
NMI	4371.88	-2.98761	0.0299266	-99.8313	0	0
NOC3L	524.616	-1.48246	0.0303662	-48.8196	0	0
NOL6	535.417	1.35114	0.0353278	38.2457	0	0
NPIPL1	9426.35	-2.56017	0.0607307	-42.1561	0	0
NR3C1	3940.33	-1.37358	0.0265847	-51.668	0	0
NR4A1	618.544	-4.79714	0.120703	-39.7433	0	0
NR4A2	1371.91	-7.13497	0.0810118	-88.0732	0	0
NR4A3	31490.2	-4.78866	0.0896101	-53.4388	0	0
NRG2	55.0659	-5.68689	0.121902	-46.6512	0	0
NRIP1	1662.69	-1.59452	0.0389414	-40.9467	0	0
NSD1	1305.26	1.60453	0.0318108	50.4396	0	0
NSRP1	651.353	-0.759951	0.0184545	-41.1798	0	0
NT5C3A	9467.99	-5.57496	0.0304724	-182.951	0	0
NUB1	12188.3	-2.39179	0.0340303	-70.2843	0	0
NUDCD3	506.19	1.28169	0.0266787	48.0418	0	0
NUDT16	929.654	1.87884	0.0376622	49.8867	0	0
NUMA1	2332.52	1.00158	0.024619	40.6831	0	0
NUP153	2579.35	-1.2552	0.025762	-48.723	0	0
NUP160	1816.04	-0.730685	0.0152332	-47.9666	0	0
NUP205	2157.38	-0.834881	0.0189616	-44.0301	0	0
NUP85	408.802	1.20906	0.0307077	39.3733	0	0
NUPL2	270.586	0.944219	0.0251298	37.5736	0	0
NXF1	3572.49	-3.01936	0.0399296	-75.617	0	0
NXT2	869.353	-2.15524	0.0460965	-46.755	0	0
OAS1	12821.2	-4.08591	0.0549705	-74.3291	0	0
OAS2	10633.2	-4.75148	0.0651377	-72.9453	0	0
OAS3	59636.4	-4.46183	0.047607	-93.722	0	0
OASL	29101.2	-8.53203	0.0604613	-141.116	0	0
OAZ2	1498.18	1.20614	0.0255164	47.2693	0	0
OCEL1	68.8084	1.97397	0.0445917	44.2675	0	0
OCRL	454.141	1.18909	0.0187047	63.5719	0	0
OGFR	2875.79	-1.2124	0.0245227	-49.44	0	0
OPTN	6713.14	-2.753	0.0371587	-74.0876	0	0
OSBPL11	967.405	1.18606	0.0289497	40.9695	0	0
OSER1	1734.84	-1.61171	0.0359044	-44.8889	0	0
OSM	1049.93	-3.41303	0.0845183	-40.3821	0	0
OSR2	693.505	-11.2336	0.176142	-63.7759	0	0
OTUD1	16125.7	-6.30833	0.0578034	-109.134	0	0
OTUD4	3666.3	-1.9957	0.0250973	-79.5187	0	0
OXA1L	1215.75	1.22863	0.0250859	48.9771	0	0
OXSR1	1508.31	-0.678656	0.0158469	-42.8258	0	0
P2RX4	1682.09	-2.48825	0.0571645	-43.5279	0	0
P2RX7	3509.54	-4.19325	0.0587726	-71.347	0	0
PAF1	8872.03	-3.21726	0.0437161	-73.5943	0	0
PAFAH2	211.411	1.20777	0.0216774	55.7156	0	0
PAG1	1464.74	-2.93482	0.0546191	-53.7325	0	0
PALM2-AKAP2	7080.46	-4.69875	0.0537041	-87.4933	0	0
PANX1	3150.23	-1.32055	0.0250879	-52.6371	0	0
PAPD4	9001.52	-2.29915	0.0321363	-71.5437	0	0
PAPD5	1059.77	-1.51731	0.0220266	-68.8851	0	0
PAPD7	2482.09	-3.20869	0.0305009	-105.2	0	0
PARG	646.065	0.712647	0.0189384	37.6297	0	0
PARP10	5082.57	-2.91993	0.0253735	-115.078	0	0
PARP11	885.69	-1.25051	0.0200395	-62.4022	0	0
PARP12	5788.11	-1.51007	0.0160511	-94.0787	0	0
PARP14	32104.9	-3.54586	0.0318408	-111.362	0	0
PARP8	2092.15	-1.18331	0.027109	-43.65	0	0
PARP9	10298.3	-2.58981	0.0196753	-131.628	0	0
PATL1	10437.9	-3.79514	0.0434094	-87.4267	0	0
PAX3	44.1822	-7.16381	0.18719	-38.2703	0	0
PAX5	1043.18	-5.5709	0.0989394	-56.3062	0	0
PBDC1	880.671	-0.759442	0.0201212	-37.7433	0	0
PCBD1	729.511	1.03559	0.022797	45.4265	0	0
PCGF5	5266.33	-2.09031	0.0244529	-85.4833	0	0
PCM1	1690.03	1.37165	0.0282882	48.4885	0	0
PCMTD2	278.779	2.04063	0.0427624	47.7202	0	0
PDCD1	171.437	-4.55055	0.107679	-42.2602	0	0
PDCD6	836.378	1.18381	0.0252409	46.9006	0	0
PDE4B	1709.05	-4.18255	0.0848106	-49.3163	0	0
PDE6D	289.213	1.03689	0.0200845	51.6266	0	0
PDGFC	600.96	2.97597	0.0704795	42.2246	0	0
PDGFRL	922.463	-8.02857	0.0907897	-88.4304	0	0
PDK2	139.305	2.73126	0.0602741	45.314	0	0
PDLIM2	230.794	2.53758	0.0612554	41.4263	0	0
PDPK1	2312.8	0.636993	0.0163177	39.0368	0	0
PDXDC1	1115.56	1.25716	0.021701	57.931	0	0
PDXK	4739.13	1.0886	0.0287054	37.9233	0	0
PDZD2	176.794	-5.56847	0.079852	-69.7349	0	0
PELI1	6338.85	-5.20496	0.0466825	-111.497	0	0
PFKFB3	4586.47	-3.91657	0.083366	-46.9805	0	0
PGAM1	6115.72	-0.774128	0.020079	-38.5542	0	0
PGP	268.092	1.69531	0.0326793	51.8773	0	0
PHACTR2	2883.85	-1.83237	0.0240694	-76.1287	0	0
PHACTR4	2748.62	-2.56344	0.0404592	-63.3586	0	0
PHF11	1915.9	-2.21815	0.0210751	-105.25	0	0
PHF15	2413.97	-1.87198	0.0251143	-74.5383	0	0
PHKG2	282.362	1.38269	0.024913	55.5007	0	0
PI4K2B	4565.72	-3.61298	0.0225656	-160.11	0	0
PI4KA	1987.43	0.847822	0.0219962	38.544	0	0
PIGS	1031.96	0.893539	0.0205314	43.5205	0	0
PIH1D1	351.889	0.865641	0.0219743	39.3933	0	0
PIK3AP1	12298.7	-1.95256	0.0419186	-46.5799	0	0
PIM3	4367.04	-1.9673	0.0439627	-44.7492	0	0
PINK1	298.532	1.86358	0.0419285	44.4465	0	0
PIP4K2B	564.695	1.48336	0.0319737	46.3932	0	0
PIP5K1A	1308.51	-0.886978	0.0215451	-41.1684	0	0
PITHD1	548.628	1.43151	0.0338244	42.3218	0	0
PIWIL4	2672.29	-3.80444	0.0396748	-95.8907	0	0
PKMYT1	297.786	1.86627	0.0421335	44.2942	0	0
PKN2	1205.5	-1.50434	0.0244264	-61.5866	0	0
PLA1A	155.237	-4.10748	0.103359	-39.7401	0	0
PLA2G4C	2887.7	-3.13755	0.0666983	-47.0409	0	0
PLAA	1141.76	-0.857688	0.0187849	-45.6584	0	0
PLAGL1	927.801	-1.53614	0.0367432	-41.8074	0	0
PLCB2	2446.16	2.38183	0.0510384	46.6674	0	0
PLCB3	873.497	1.20087	0.0278819	43.07	0	0
PLEK	16432.3	-1.69931	0.0330828	-51.3654	0	0
PLEKHA4	2074.16	-8.18293	0.0816724	-100.192	0	0
PLEKHF2	3639.33	-2.61277	0.0437221	-59.7585	0	0
PLEKHM1	932.349	0.980791	0.0251892	38.937	0	0
PLEKHO1	5632.24	-1.40326	0.0301196	-46.5897	0	0
PLK2	337.231	-4.73402	0.0783349	-60.4331	0	0
PLS3	373.811	-5.64121	0.115116	-49.0045	0	0
PLSCR1	5171.93	-3.40441	0.0695754	-48.9313	0	0
PLXNB2	5691.53	1.32576	0.0348447	38.0476	0	0
PLXND1	4006.81	1.43418	0.0351769	40.7706	0	0
PMAIP1	16595.3	-9.12357	0.0774839	-117.748	0	0
PML	5652.82	-3.24409	0.0216959	-149.526	0	0
PMPCA	327.41	1.37183	0.0332068	41.3116	0	0
PMVK	241.867	1.51248	0.039241	38.5433	0	0
PNPLA6	2864.35	1.62496	0.0309912	52.433	0	0
PNPO	460.295	1.51416	0.0290597	52.1052	0	0
PNPT1	3865.2	-3.26099	0.0225234	-144.782	0	0
PNRC1	12832.8	-3.6008	0.0607688	-59.2541	0	0
PNRC2	4723.14	-1.84294	0.0264093	-69.7839	0	0
POGK	1390.38	0.787444	0.0136022	57.8908	0	0
POGZ	1570.94	-0.555053	0.0144658	-38.3701	0	0
POLR2G	599.394	0.861776	0.0203658	42.3148	0	0
POLRMT	271.684	1.35558	0.0348211	38.9297	0	0
PPA1	2748.35	-2.53711	0.0401259	-63.2286	0	0
PPCS	645.502	0.648908	0.015836	40.9768	0	0
PPIP5K2	1055.82	1.35836	0.0315225	43.0918	0	0
PPM1A	738.157	0.712498	0.0185334	38.4439	0	0
PPM1B	2102.15	-1.03097	0.0262658	-39.2514	0	0
PPM1F	1013.8	2.32224	0.0501675	46.2897	0	0
PPM1K	4368.27	-3.64495	0.0282315	-129.109	0	0
PPP1R10	2319.59	-1.56429	0.0278816	-56.1049	0	0
PPP1R15A	66986.2	-6.79848	0.0500472	-135.841	0	0
PPP1R7	1110.21	1.52289	0.0353408	43.0916	0	0
PPP2R2A	2255.38	-2.33248	0.022246	-104.849	0	0
PPP3CC	1447.21	-1.80747	0.0244366	-73.9658	0	0
PPP4R2	2519.04	-2.16489	0.0382847	-56.547	0	0
PPP6C	1175.74	0.626437	0.0145561	43.0362	0	0
PPTC7	1618.16	-0.952856	0.0219077	-43.4941	0	0
PRADC1	96.6737	2.22511	0.0516168	43.1083	0	0
PRAME	180.467	-5.62923	0.118196	-47.6264	0	0
PREB	533.896	1.01408	0.0225551	44.9604	0	0
PREPL	356.098	2.78873	0.0416561	66.9465	0	0
PRKACA	1101.57	1.46092	0.0251028	58.1974	0	0
PRKAG2	1439.5	-1.1275	0.0258055	-43.6924	0	0
PRKAR2A	738.906	1.41531	0.0212901	66.4773	0	0
PRKCD	5092.8	-0.965179	0.0225428	-42.8154	0	0
PRKRIR	938.982	0.782981	0.0182827	42.8263	0	0
PROSC	1000.87	0.633444	0.0157052	40.3334	0	0
PRPF3	1012.56	-1.12598	0.0265117	-42.4713	0	0
PRPF8	5213.04	1.05286	0.0258304	40.7606	0	0
PRPSAP1	251.028	1.1942	0.0279081	42.7904	0	0
PRPSAP2	222.968	1.05379	0.0253221	41.6155	0	0
PRRC1	861.009	1.0823	0.0224258	48.2614	0	0
PRRG4	3297.61	-4.14692	0.0563471	-73.5961	0	0
PSMA3	2244.32	-0.988376	0.0155804	-63.4371	0	0
PSMA4	3617.17	-1.98313	0.0186487	-106.342	0	0
PSMA5	2551.82	-0.986523	0.0150786	-65.4252	0	0
PSMB10	2006.9	-1.21333	0.021814	-55.6215	0	0
PSMB9	2748.71	-2.23509	0.0305212	-73.2306	0	0
PSMD1	1849.75	0.76393	0.0174904	43.6771	0	0
PSMD10	525.608	0.884798	0.0182277	48.5413	0	0
PSME1	4358.91	-1.28047	0.0243827	-52.5155	0	0
PSME2	5724.56	-2.20704	0.0245407	-89.9338	0	0
PSMG3	182.758	1.28386	0.0309836	41.4365	0	0
PSPC1	798.247	-1.11244	0.0209468	-53.1078	0	0
PTGER2	1924.87	-3.0796	0.0743684	-41.41	0	0
PTGER4	7578.43	-3.82037	0.0634264	-60.233	0	0
PTGFRN	455.383	2.33798	0.0511192	45.7358	0	0
PTGS2	11179.9	-9.28032	0.0835294	-111.102	0	0
PTK2B	3707.7	-3.09884	0.053397	-58.0339	0	0
PTP4A1	6034.81	-2.44201	0.0442574	-55.1775	0	0
PTPLAD1	587.993	1.62498	0.0418111	38.8648	0	0
PTPN1	3784.46	-1.49826	0.0336426	-44.5346	0	0
PTPN18	1349.27	1.64842	0.028005	58.8614	0	0
PTPRA	2759.82	-0.750481	0.0148514	-50.5326	0	0
PTX3	655.752	-4.58922	0.103009	-44.5515	0	0
PVRL2	4575.09	-1.24477	0.0271895	-45.7813	0	0
PVRL3	236.515	-4.71114	0.0775515	-60.7486	0	0
PXDC1	1828.15	-2.04494	0.0467555	-43.7368	0	0
PYGL	1334.17	1.76316	0.0423517	41.6314	0	0
PYGO2	340.867	1.38762	0.0322756	42.9927	0	0
R3HCC1L	681.893	-0.639777	0.0160607	-39.8349	0	0
RAB12	1795.46	-2.14417	0.0294933	-72.7002	0	0
RAB21	2008.49	-1.19878	0.0256076	-46.8136	0	0
RAB24	677.25	-1.21376	0.0321229	-37.7848	0	0
RAB2B	537.657	-1.01764	0.0252974	-40.2272	0	0
RAB32	972.541	1.85512	0.0401387	46.2178	0	0
RAB3IL1	137.552	4.46536	0.111845	39.9247	0	0
RAB42	229.132	3.47186	0.0906065	38.318	0	0
RAB4A	418.585	0.921355	0.0241111	38.2128	0	0
RAB5A	6493.86	-2.37269	0.0491487	-48.2757	0	0
RAB8B	6486.55	-1.8161	0.0244513	-74.2741	0	0
RAB9A	1314.83	-1.36231	0.0284093	-47.953	0	0
RABAC1	771.289	-1.36112	0.03484	-39.0677	0	0
RABGAP1L	2560.37	-2.6165	0.0223991	-116.813	0	0
RAD9A	358.97	-1.94827	0.0256734	-75.8867	0	0
RALB	4051.7	-1.17739	0.021254	-55.3959	0	0
RALBP1	1141.76	0.70693	0.0132443	53.3761	0	0
RALGPS2	221.416	3.14212	0.0830046	37.8548	0	0
RANBP2	3136.63	0.867883	0.0211648	41.0059	0	0
RANBP3	679.784	0.658193	0.0153098	42.9917	0	0
RANBP3L	3061.26	-8.9466	0.0882456	-101.383	0	0
RAP2A	1672.9	1.55014	0.0368108	42.1109	0	0
RAPGEF2	9085.42	-3.25933	0.0427486	-76.2442	0	0
RARRES3	387.923	-3.54676	0.0588667	-60.2507	0	0
RASGRP4	294.33	2.53856	0.062578	40.5664	0	0
RASL11A	268.232	-5.06023	0.0881659	-57.3944	0	0
RASSF1	419.633	1.51242	0.0265765	56.9082	0	0
RBBP6	3470.18	-2.42452	0.0264853	-91.5421	0	0
RBCK1	2572.58	-1.68735	0.0207718	-81.2326	0	0
RBL2	1327.52	1.36418	0.0267454	51.006	0	0
RBM43	987.187	-1.62887	0.0304756	-53.4483	0	0
RBM7	1003.85	-1.09924	0.0158677	-69.275	0	0
RELA	2592.03	-1.55971	0.0220819	-70.6331	0	0
RER1	1346.99	0.536701	0.0117956	45.5001	0	0
RET	368.63	-5.83073	0.0760228	-76.6971	0	0
RFNG	191.234	1.10731	0.0292806	37.8172	0	0
RGS14	258.673	3.05116	0.0803728	37.9626	0	0
RGS19	812.696	1.22372	0.0294838	41.5048	0	0
RGS3	231.454	-2.49021	0.0615568	-40.4538	0	0
RHBDF2	1305.58	-2.01159	0.0469947	-42.8047	0	0
RHCG	565.346	-9.3215	0.151809	-61.4028	0	0
RHEBL1	222.586	-3.97917	0.0727664	-54.6841	0	0
RIC8A	1142.53	0.708248	0.0175409	40.3768	0	0
RICTOR	1855.53	-2.05979	0.0235061	-87.628	0	0
RIN2	7241.91	-3.74211	0.0769571	-48.626	0	0
RIPK1	2973.52	-1.95656	0.0235001	-83.2575	0	0
RIPK2	5492.27	-4.68117	0.0499388	-93.7381	0	0
RLF	1068.09	-1.17417	0.0214582	-54.7188	0	0
RLIM	2095.92	-0.87082	0.0225468	-38.6227	0	0
RMI2	871.807	-1.69958	0.036429	-46.6547	0	0
RND1	1304.57	-7.38483	0.101147	-73.0105	0	0
RNF11	1199.59	-0.750305	0.0177667	-42.2311	0	0
RNF114	4959.7	-1.41621	0.0183686	-77.0994	0	0
RNF122	233.367	-4.10542	0.0708013	-57.9851	0	0
RNF138	1604.96	-1.79892	0.0234353	-76.761	0	0
RNF14	733.638	1.04534	0.0219633	47.5948	0	0
RNF144B	4999.77	-1.92869	0.0344064	-56.0561	0	0
RNF149	3484.67	-2.4624	0.0316322	-77.845	0	0
RNF166	288.024	2.08842	0.0518635	40.2677	0	0
RNF19A	4509.92	-2.22982	0.0336757	-66.2143	0	0
RNF19B	8503.19	-1.76067	0.0436562	-40.3304	0	0
RNF213	87733.4	-2.47634	0.0291342	-84.9975	0	0
RNF216	829.202	0.643614	0.0159879	40.2563	0	0
RNF220	572.458	1.2186	0.0236349	51.5591	0	0
RNF31	4051.59	-1.18797	0.0140823	-84.3589	0	0
RNF40	1369.7	0.541734	0.0123539	43.8513	0	0
RNF44	524.669	2.17459	0.0369245	58.893	0	0
RNF7	504.992	0.578933	0.0152598	37.9385	0	0
RNMT	986.313	0.768444	0.0189027	40.6526	0	0
RP2	2614.69	-1.61144	0.0298051	-54.0661	0	0
RPL7L1	1245.5	0.914296	0.0222538	41.085	0	0
RPP14	364.442	1.15285	0.0186371	61.8581	0	0
RPP25L	75.4712	1.70749	0.0340716	50.1148	0	0
RPS6KC1	1381.16	-1.9378	0.0369447	-52.4513	0	0
RRAGC	2876.93	-0.798638	0.0168102	-47.5091	0	0
RRP1B	2651.66	1.26252	0.0318344	39.6589	0	0
RSAD1	154.403	2.47968	0.0448168	55.3293	0	0
RSAD2	55016.4	-6.18358	0.11399	-54.2469	0	0
RSRC2	1397.06	-1.46481	0.0280553	-52.2115	0	0
RTCB	5860.12	-1.70967	0.026073	-65.5722	0	0
RTN3	2835.5	0.833299	0.0218034	38.2187	0	0
RTP4	1289.29	-3.41476	0.0273125	-125.026	0	0
RUNX3	2848.02	-1.81695	0.0381239	-47.6591	0	0
RXRB	497.325	0.844059	0.0204994	41.1748	0	0
RYBP	2326.32	-1.40093	0.0353542	-39.6257	0	0
SAMD1	282.78	1.80569	0.0340076	53.0968	0	0
SAMD9	30115.6	-3.6984	0.0368559	-100.347	0	0
SAMD9L	13133.5	-2.26995	0.0348799	-65.0789	0	0
SAMSN1	7138.55	-1.45311	0.0354974	-40.9358	0	0
SAP18	2986.98	-1.24748	0.0190683	-65.4216	0	0
SAR1A	2435.93	-1.78844	0.0387425	-46.1624	0	0
SAT1	18074.7	-2.22089	0.0347998	-63.8191	0	0
SAT2	957.189	-0.867153	0.0208186	-41.6529	0	0
SAV1	1380.1	-2.70274	0.0357477	-75.6061	0	0
SCAMP2	2326.03	1.01336	0.0197179	51.3932	0	0
SCAP	500.436	1.51808	0.0339615	44.7001	0	0
SCARB2	9823.01	-2.04953	0.0475961	-43.0609	0	0
SCIN	330.656	-6.26141	0.108967	-57.4614	0	0
SCLT1	575.209	-1.40116	0.0190474	-73.5618	0	0
SCRIB	425.664	1.44793	0.0328687	44.0518	0	0
SDC4	5574.21	-3.31347	0.077255	-42.8901	0	0
SDCCAG3	209.194	1.66628	0.0387016	43.0544	0	0
SDF2	445.843	0.578981	0.0142619	40.5964	0	0
SDHC	1399.13	0.824686	0.0214176	38.505	0	0
SEC11A	1439.88	0.666434	0.015861	42.0173	0	0
SEC16A	1913.65	0.870964	0.019389	44.9205	0	0
SEC24A	1965.68	-1.07154	0.02178	-49.1985	0	0
SECISBP2L	2089.17	-0.847573	0.0219176	-38.6708	0	0
SECTM1	6179.08	-2.7214	0.0498589	-54.5821	0	0
SELO	1356.08	-1.58887	0.041816	-37.9966	0	0
SEMA3D	551.853	-8.57283	0.118143	-72.563	0	0
SEMA4D	3147.27	-2.45049	0.0242205	-101.174	0	0
2018-09-08	260.19	1.37444	0.0358437	38.3453	0	0
SERP1	2878.49	0.64662	0.0170729	37.8742	0	0
SERPINB9	4623.21	-3.94923	0.0531836	-74.2564	0	0
SERPING1	2938.96	-4.76034	0.0543269	-87.624	0	0
SERTAD1	860.872	-1.44269	0.0330303	-43.6779	0	0
SETD7	1065.08	2.0188	0.0328902	61.3798	0	0
SETX	6656.86	-0.729543	0.0165842	-43.9901	0	0
SF3A3	936.682	1.10519	0.0277859	39.7753	0	0
SFPQ	2760.19	-0.860449	0.0216259	-39.7879	0	0
SFXN5	252.494	2.29939	0.0346061	66.4447	0	0
SH2B1	329.329	1.34343	0.0294933	45.5503	0	0
SH3GL1	641.92	1.45457	0.036559	39.787	0	0
SH3GLB1	4182.23	-0.810994	0.0150505	-53.8849	0	0
SHC4	1942.64	0.855034	0.0210252	40.6671	0	0
SHOC2	2495.7	-1.04545	0.0234208	-44.6377	0	0
SIAH2	1459.46	-2.88192	0.040992	-70.3044	0	0
SIK3	855.431	-1.29399	0.0329888	-39.2251	0	0
SIRT2	706.822	1.00965	0.0194517	51.9054	0	0
SKI	830.521	1.49476	0.0373456	40.0251	0	0
SKIV2L2	1010.63	1.3273	0.0281232	47.1959	0	0
SLAMF7	32022.8	-5.60493	0.0864887	-64.8053	0	0
SLC12A9	1218.19	1.99318	0.0496811	40.1195	0	0
SLC1A3	1925.34	-3.2109	0.0697587	-46.0287	0	0
SLC24A6	1145.12	1.78399	0.0295755	60.3198	0	0
SLC25A20	379.634	1.28315	0.0322177	39.8275	0	0
SLC25A24	2935.19	-1.10522	0.0289423	-38.187	0	0
SLC25A28	1620.55	-2.47876	0.026203	-94.5983	0	0
SLC31A2	2250.71	-3.26547	0.0330185	-98.8982	0	0
SLC35C1	323.758	1.44163	0.0273397	52.7304	0	0
SLC37A4	291.527	1.69483	0.0325224	52.1127	0	0
SLC38A5	1025.67	-5.23808	0.0663862	-78.9032	0	0
SLC38A7	745.006	1.94522	0.0458861	42.3924	0	0
SLC39A10	638.517	1.81981	0.0437147	41.6293	0	0
SLC39A7	1375.74	0.64417	0.015486	41.597	0	0
SLC41A2	3518.31	-2.15651	0.0469486	-45.9335	0	0
SLC46A3	1142.65	3.4265	0.066601	51.4481	0	0
SLC48A1	438.501	2.31576	0.0601632	38.4914	0	0
SLC6A12	1083.88	-5.05747	0.073496	-68.8128	0	0
SLC6A8	927.142	-3.1565	0.0493674	-63.9389	0	0
SLC8A1	1702.81	-2.19006	0.0538921	-40.6379	0	0
SLFN12	1639.35	-1.31383	0.0268381	-48.9539	0	0
SMAD4	1499.82	-1.14091	0.0193251	-59.038	0	0
SMARCA5	6836.88	-1.60202	0.0153857	-104.124	0	0
SMARCC2	1468.24	0.955281	0.0194985	48.9925	0	0
SMCHD1	5223.92	-2.13042	0.0332965	-63.9832	0	0
SMCR7L	773.812	1.1471	0.0222843	51.4758	0	0
SMU1	1857.93	-0.527408	0.0128301	-41.107	0	0
SMURF1	1062.72	-1.41642	0.02261	-62.6458	0	0
SNAPC2	222.108	1.43543	0.0312017	46.0047	0	0
SNHG15	336.412	-2.37672	0.0533977	-44.5097	0	0
SNIP1	588.388	-1.29451	0.0175074	-73.9405	0	0
SNX13	699.243	1.04581	0.0238166	43.9108	0	0
SNX18	674.91	1.74523	0.0457341	38.1603	0	0
SNX29	1528.16	2.15129	0.0395696	54.3672	0	0
SNX30	782.96	2.42737	0.0459719	52.8012	0	0
SOCS1	1629.14	-1.35637	0.0276864	-48.9906	0	0
SOD2	68517.3	-3.7234	0.0938669	-39.6668	0	0
SOS2	1014.73	1.31259	0.024024	54.6368	0	0
SP100	5217.29	-1.96084	0.0172039	-113.977	0	0
SP110	4920.64	-3.41771	0.0236227	-144.679	0	0
SP140	2788.52	-4.26787	0.0353932	-120.584	0	0
SPATA13	1890.28	-2.03671	0.0356717	-57.0958	0	0
SPATS2L	2567.72	-1.3763	0.0198194	-69.4423	0	0
SPG20	2786.27	-0.933991	0.0223405	-41.8071	0	0
SPIN1	736.118	1.33172	0.0349988	38.0504	0	0
SPIRE1	415.594	1.62742	0.0320558	50.7683	0	0
SPPL2A	4652.21	-1.2353	0.0234724	-52.6275	0	0
SPPL3	559.369	0.846377	0.020867	40.5605	0	0
SPRY1	387.74	-7.59623	0.126599	-60.0021	0	0
SPRYD3	570.353	0.707409	0.0166252	42.5505	0	0
SPSB1	799.719	-2.1287	0.0340143	-62.5825	0	0
SPSB3	260.759	1.16102	0.0283546	40.9466	0	0
SPTLC2	2706.41	-1.50764	0.0351616	-42.8774	0	0
SQRDL	8799.5	-1.68251	0.018797	-89.5093	0	0
SRC	4706.9	-2.09224	0.0383094	-54.6144	0	0
SRD5A3-AS1	50.7062	-5.72699	0.133929	-42.7612	0	0
SRGAP2	7274.58	-2.42244	0.0200804	-120.637	0	0
SRGAP2B	1455.78	-2.70315	0.0256504	-105.384	0	0
SRGAP2D	2446.04	-2.23956	0.0268979	-83.2618	0	0
SRGN	27759.8	-1.43318	0.0345058	-41.5343	0	0
SRP54	2109.98	-1.0845	0.0167044	-64.9231	0	0
SRSF4	2305.63	-0.867023	0.0183927	-47.1394	0	0
SSB	7910.31	-2.30492	0.0221278	-104.164	0	0
SSH3	285.159	1.42305	0.0340904	41.7435	0	0
ST3GAL5	2891.97	-1.65633	0.035421	-46.7613	0	0
ST7-AS1	198.568	-5.03216	0.074083	-67.926	0	0
STAP1	1484.04	-5.44625	0.0732377	-74.364	0	0
STARD4	1849.44	-2.26529	0.0472307	-47.9622	0	0
STARD5	510.667	-3.21088	0.0429012	-74.8435	0	0
STAT1	51153.1	-3.01086	0.0332874	-90.4502	0	0
STAT2	12647.9	-2.59712	0.0220488	-117.79	0	0
STAT3	6728.91	-1.05369	0.0136687	-77.0875	0	0
STAT5A	6396.35	-1.16187	0.0287436	-40.4219	0	0
STAU1	2490.26	-0.678269	0.0118285	-57.3421	0	0
STK11IP	390.065	1.0171	0.0202494	50.2287	0	0
STK17A	1217.26	-1.81205	0.0338824	-53.4807	0	0
STK17B	2721.9	-2.01302	0.0439847	-45.7665	0	0
STK24	2915.77	-1.01623	0.0230973	-43.9976	0	0
STK3	868.385	-1.90589	0.0291435	-65.3966	0	0
STK40	3464.95	-1.03855	0.0200711	-51.7434	0	0
STOM	9307.09	-2.08504	0.0288853	-72.1835	0	0
STRADA	780.968	0.869629	0.0230442	37.7375	0	0
STRADB	377.576	1.10105	0.0263447	41.794	0	0
STX11	6352.22	-4.46982	0.0398523	-112.16	0	0
STX12	3496.78	-1.49183	0.0277817	-53.6985	0	0
STX17	1471.38	-1.27874	0.0175718	-72.7723	0	0
STX5	2602	-1.36016	0.0311004	-43.7347	0	0
SUB1	5752.13	-1.08408	0.0275016	-39.4188	0	0
SUFU	742.182	1.95851	0.0327576	59.7879	0	0
SUMF1	517.795	1.41928	0.0365757	38.804	0	0
SUMO3	1744.81	0.651653	0.0150784	43.2176	0	0
SUN1	541.088	1.36353	0.0255542	53.3583	0	0
SWT1	614.964	-2.71582	0.047277	-57.4449	0	0
SYK	3472.96	1.52829	0.0343625	44.4754	0	0
SYNJ2BP-COX16	826.784	0.859326	0.0159527	53.8672	0	0
SYS1-DBNDD2	578.146	1.67134	0.0394085	42.4107	0	0
SYTL3	601.867	-2.72691	0.0391572	-69.64	0	0
SYVN1	757.466	0.945399	0.0181723	52.0242	0	0
TAB2	3207.02	-1.15617	0.0288263	-40.1082	0	0
TADA2B	539.255	0.820371	0.0156165	52.5322	0	0
TADA3	1082.13	0.97232	0.0233562	41.63	0	0
TAF12	249.976	1.01309	0.0202256	50.0894	0	0
TANGO2	526.939	1.7114	0.0237572	72.0373	0	0
TANK	3990.61	-1.8683	0.0375558	-49.7473	0	0
TAOK2	890.158	0.839436	0.0196862	42.6409	0	0
TAP1	17788.4	-2.95431	0.0222083	-133.027	0	0
TAP2	7125.91	-1.90221	0.0292051	-65.1328	0	0
TAPBP	6957.89	-1.25845	0.0290354	-43.3419	0	0
TARBP2	196.818	1.17448	0.027118	43.3098	0	0
TAX1BP1	5060.1	-0.581051	0.0152998	-37.9777	0	0
TAZ	231.295	1.25703	0.0321095	39.1481	0	0
TBC1D1	2094.65	-0.874525	0.0201838	-43.3281	0	0
TBC1D14	1944.92	2.16352	0.0343391	63.0045	0	0
TBC1D22B	701.429	-1.08537	0.0187631	-57.846	0	0
TBC1D3G	7623.86	-8.10883	0.155884	-52.0184	0	0
TBK1	1838.16	-1.00103	0.0168025	-59.5764	0	0
TCAIM	485.212	1.08608	0.0213988	50.7544	0	0
TCEAL1	100.648	1.21115	0.0257495	47.0358	0	0
TCEAL8	415.861	1.02967	0.0229423	44.8809	0	0
TDRD7	5688.93	-2.94838	0.0237391	-124.199	0	0
TDRKH	1323.51	1.31546	0.0336389	39.1054	0	0
TECPR2	281.034	1.10814	0.0192716	57.5013	0	0
TEX14	260.495	-4.04632	0.0738684	-54.7774	0	0
TEX264	485.398	1.63246	0.0305393	53.4544	0	0
TFEC	10745.4	-1.4085	0.0338716	-41.5834	0	0
TFG	2107.1	-0.883476	0.0179056	-49.3407	0	0
TGIF1	2696.69	-3.42924	0.048325	-70.962	0	0
TGIF2	442.14	-1.30941	0.0311681	-42.0114	0	0
TGM1	161.81	-5.05304	0.0697281	-72.4678	0	0
TGS1	627.971	-0.873723	0.0202603	-43.1249	0	0
THAP3	241.114	-1.80956	0.0316219	-57.225	0	0
THAP4	261.646	1.20737	0.0269493	44.8014	0	0
THOC2	2348.91	-1.11489	0.0226675	-49.1844	0	0
THOC6	297.74	0.861813	0.0224298	38.4227	0	0
TIA1	2615.61	-1.06872	0.0200426	-53.3226	0	0
TICAM1	1068.74	-1.41599	0.028025	-50.526	0	0
TIMM21	132.802	2.54813	0.0512233	49.7456	0	0
TIMMDC1	3144	-1.76905	0.0390048	-45.3546	0	0
TINF2	1734.05	-1.32249	0.02409	-54.8976	0	0
TIPARP	4018.27	-2.97582	0.041532	-71.6513	0	0
TIPRL	1031.57	-0.967878	0.0223531	-43.2995	0	0
TK2	980.45	1.85925	0.0492016	37.7884	0	0
TLE4	1947.33	-1.42335	0.0305988	-46.5167	0	0
TLK2	1459.92	-1.62966	0.0145845	-111.739	0	0
TLL2	165.979	-5.05122	0.0828644	-60.9576	0	0
TLR3	1098.97	-3.19623	0.0550736	-58.0356	0	0
TM9SF3	1154.34	2.15471	0.0417248	51.6411	0	0
TM9SF4	1009.89	0.70176	0.0161124	43.5539	0	0
TMCC1	364.258	1.08591	0.0182379	59.5414	0	0
TMCC3	1553.11	-3.11964	0.0567607	-54.9612	0	0
TMCO3	864.349	1.2675	0.0283893	44.647	0	0
TMEM107	84.0171	1.48702	0.0364439	40.8029	0	0
TMEM110-MUSTN1	3641.44	-2.41223	0.0298672	-80.7652	0	0
TMEM115	485.884	1.07057	0.0252875	42.3359	0	0
TMEM123	21386.9	-1.14123	0.0245275	-46.5287	0	0
TMEM129	326.108	1.66819	0.0278679	59.8605	0	0
TMEM140	1889.76	-3.55739	0.0506315	-70.2605	0	0
TMEM171	189.799	-8.76779	0.177459	-49.4074	0	0
TMEM184C	752.888	0.943557	0.0132173	71.3878	0	0
TMEM194A	5423.37	-3.24848	0.0534184	-60.8119	0	0
TMEM203	206.908	1.60409	0.0316671	50.6547	0	0
TMEM217	176.144	-4.2969	0.067322	-63.8262	0	0
TMEM219	2308.04	-0.844044	0.0194887	-43.3094	0	0
TMEM229B	1529.21	-2.4512	0.0623504	-39.3134	0	0
TMEM245	1008.4	1.21603	0.0278458	43.6701	0	0
TMEM248	1665.82	0.364052	0.00805063	45.2203	0	0
TMEM255A	727.925	-2.09196	0.0487445	-42.9168	0	0
TMEM50A	5647.87	-1.06271	0.0264451	-40.1854	0	0
TMEM55A	244.176	1.32051	0.0344249	38.359	0	0
TMEM9	168.548	2.11258	0.0502791	42.0171	0	0
TMX1	3232.57	-0.894663	0.0197372	-45.3287	0	0
TNF	33394.3	-8.38406	0.0843109	-99.4421	0	0
TNFAIP2	14903.1	-2.58211	0.0610671	-42.2831	0	0
TNFAIP3	42291.6	-6.28731	0.0948456	-66.29	0	0
TNFAIP6	3656.87	-6.51612	0.129185	-50.4401	0	0
TNFAIP8	12703.9	-2.89939	0.045861	-63.2213	0	0
TNFAIP8L2-SCNM1	943.576	1.17925	0.019975	59.0361	0	0
TNFRSF9	1991.81	-4.88393	0.0978737	-49.9003	0	0
TNFSF10	22849.9	-6.05017	0.102835	-58.8339	0	0
TNFSF13B	10223.5	-3.57352	0.0311849	-114.591	0	0
TNFSF15	2097.64	-5.97191	0.128025	-46.6466	0	0
TNFSF18	2854.11	-6.14144	0.0923569	-66.4968	0	0
TNFSF8	743.819	-3.77866	0.0995399	-37.9612	0	0
TNFSF9	529.524	-5.35634	0.0662919	-80.7994	0	0
TOB2	1081.54	-1.14494	0.0262389	-43.6353	0	0
TOLLIP	818.183	0.816778	0.0213274	38.297	0	0
TOP1	3740.73	-0.916812	0.0194531	-47.1293	0	0
TOR1B	3746.67	-2.2984	0.0253467	-90.6784	0	0
TOR2A	235.8	1.58417	0.0247392	64.0347	0	0
TOX4	1987.4	-0.966661	0.0247715	-39.0232	0	0
TPRG1L	463.64	2.15854	0.0366075	58.9645	0	0
TRAF1	16222.9	-4.12127	0.100071	-41.1835	0	0
TRAF7	1100.04	0.874125	0.0202746	43.1142	0	0
TRAFD1	8477.92	-2.37128	0.0244268	-97.0773	0	0
TRAK2	1129.82	0.73168	0.0181581	40.2949	0	0
TRANK1	6318.27	-3.00841	0.0373154	-80.6213	0	0
TRAPPC11	1019.29	0.698719	0.0172923	40.4065	0	0
TRAPPC12	429.678	1.15495	0.027281	42.3354	0	0
TRAPPC2L	218.582	1.38851	0.0368485	37.6817	0	0
TRAPPC3	696.636	0.466906	0.00571336	81.7218	0	0
TRIM21	2755.15	-2.35004	0.0198602	-118.329	0	0
TRIM22	10201.7	-2.7426	0.0291408	-94.1153	0	0
TRIM25	9224.02	-2.14329	0.0246341	-87.0049	0	0
TRIM26	3988.89	-2.25024	0.0245848	-91.5297	0	0
TRIM27	696.902	1.20568	0.0192251	62.7138	0	0
TRIM31	283.298	-5.18254	0.0943139	-54.9499	0	0
TRIM33	1497.29	-1.14856	0.0220913	-51.9916	0	0
TRIM36	961.055	-1.76288	0.041646	-42.3302	0	0
TRIM5	2580.34	-2.05293	0.0276276	-74.3071	0	0
TRIM56	2696.17	-1.51465	0.0185714	-81.5582	0	0
TRIM65	336.023	2.25327	0.0416516	54.0979	0	0
TRIM69	2428.91	-2.00646	0.0273077	-73.476	0	0
TRIP12	8897.34	-0.61958	0.0142625	-43.4413	0	0
TRIP4	1719.87	-1.47378	0.0205621	-71.6746	0	0
TRMT2A	427.166	1.35651	0.0243669	55.6702	0	0
TRPC4AP	4529.03	-1.18755	0.0135979	-87.3334	0	0
TRPM3	60.6336	-5.15114	0.125596	-41.0135	0	0
TSC2	684.228	1.15562	0.0269842	42.8258	0	0
TSC22D2	1356.33	-2.80453	0.0384907	-72.8625	0	0
TSLP	87.9089	-5.67276	0.132536	-42.8016	0	0
TSN	776.392	1.00043	0.0223953	44.6713	0	0
TSPAN15	1088.9	2.87261	0.0694403	41.368	0	0
TTC13	385.54	2.35257	0.041018	57.3546	0	0
TTC3	1397.57	1.74787	0.0426253	41.0055	0	0
TTC39B	2102.19	-3.04548	0.0660707	-46.0943	0	0
TTLL13	609.195	0.817439	0.0158746	51.4936	0	0
TUBB2A	888.552	-2.38328	0.0601402	-39.6287	0	0
TUBGCP2	1035.09	0.994412	0.0244123	40.7341	0	0
TUFT1	405.513	-2.38759	0.0438505	-54.4485	0	0
TUSC2	263.562	0.931033	0.0185343	50.2329	0	0
TWIST1	124.615	-7.93869	0.166943	-47.5533	0	0
TXLNA	1650.62	0.671933	0.0171889	39.0912	0	0
TXN2	802.71	1.01525	0.0262335	38.7005	0	0
TXNDC16	782.74	-1.67156	0.0417063	-40.0793	0	0
UBA6	2441.83	-1.20746	0.0264959	-45.5717	0	0
UBA7	3856.23	-1.98805	0.0291495	-68.2018	0	0
UBAC1	621.418	2.18125	0.0309512	70.4737	0	0
UBC	59795.6	-1.09405	0.021191	-51.6282	0	0
UBE2B	1364.73	-0.956322	0.0218941	-43.6795	0	0
UBE2D3	8169.51	-0.936758	0.0155395	-60.2825	0	0
UBE2E1	4802.93	-1.98613	0.0314952	-63.0616	0	0
UBE2E3	472.874	0.916293	0.02277	40.2413	0	0
UBE2G2	825.648	1.24082	0.0306978	40.4204	0	0
UBE2L6	9563.92	-3.03041	0.0207165	-146.28	0	0
UBE2S	1222.37	-2.5464	0.0339963	-74.9023	0	0
UBE2Z	9680.73	-2.49139	0.0380831	-65.4199	0	0
UBL4A	380.393	1.65139	0.0380925	43.3522	0	0
UBN2	648.077	-1.77491	0.0450024	-39.4403	0	0
UBXN6	902.404	0.849636	0.0207221	41.0015	0	0
UFL1	674.013	1.14529	0.0191714	59.7396	0	0
ULK1	309.709	1.94798	0.0350154	55.6321	0	0
UNC45A	780.203	0.91857	0.0222172	41.3449	0	0
UNC93B1	5994.32	-1.72457	0.0259673	-66.4133	0	0
USP15	4701.75	-1.40964	0.0152257	-92.5827	0	0
USP18	8767.39	-6.44074	0.0506827	-127.08	0	0
USP22	1909.8	0.895104	0.015824	56.5662	0	0
USP25	3173.78	-2.19573	0.0192038	-114.339	0	0
USP28	792.007	-0.976514	0.0251142	-38.8829	0	0
USP33	2442.3	-1.00859	0.0151684	-66.4926	0	0
USP41	90.2415	-5.05701	0.108888	-46.4422	0	0
USP6NL	1142.8	-1.74301	0.0406009	-42.9304	0	0
USPL1	884.3	-1.05801	0.0259041	-40.8435	0	0
UTP18	840.578	0.802573	0.0194313	41.303	0	0
UTRN	4587.8	-1.44374	0.0270361	-53.4003	0	0
VCPIP1	5704.09	-2.26554	0.0354995	-63.819	0	0
VEZF1	2707.79	-1.70677	0.0247157	-69.0562	0	0
VPS26B	502.525	1.97481	0.0375022	52.6586	0	0
VPS33A	980.158	0.56627	0.012585	44.9955	0	0
VPS35	1899.15	1.0001	0.0174351	57.3612	0	0
VPS37A	882.764	-0.982583	0.0237738	-41.3306	0	0
VRK2	1894.9	-1.16802	0.019102	-61.1466	0	0
WARS	31673.6	-4.11442	0.0456649	-90.1003	0	0
WAS	740.699	1.43203	0.0300591	47.6403	0	0
WASL	1285.62	-2.21874	0.0433866	-51.1388	0	0
WBP4	589.237	-1.29601	0.0211242	-61.3517	0	0
WDFY1	3080.82	-1.53029	0.0223442	-68.4873	0	0
WDR26	2369.24	0.584707	0.0148437	39.391	0	0
WDR37	825.478	1.55384	0.0228099	68.1213	0	0
WDR53	109.341	0.811104	0.0145233	55.8484	0	0
WDR55	256.978	-4.08683	0.07945	-51.439	0	0
WDR81	1774.61	1.4478	0.0262392	55.1768	0	0
WDTC1	734.863	1.64521	0.0337216	48.7878	0	0
WHAMM	615.16	-1.82756	0.0313638	-58.2696	0	0
WIPI2	967.267	1.15622	0.0197726	58.4761	0	0
WNK1	7466.15	-0.880463	0.0223303	-39.4291	0	0
WRB	131.896	1.5568	0.0338594	45.9783	0	0
WTAP	6283.02	-2.95923	0.0431375	-68.5998	0	0
XAF1	8060.79	-2.56846	0.03588	-71.5847	0	0
XBP1	9052.52	-3.04407	0.0494554	-61.5518	0	0
XIAP	1963.12	-0.732968	0.0159542	-45.942	0	0
XLOC_000182	230.509	-3.78885	0.0633701	-59.7893	0	0
XLOC_000436	90.9967	-2.93055	0.0523661	-55.9627	0	0
XLOC_000507	54.9173	-7.51875	0.187236	-40.1564	0	0
XLOC_000917	4186.29	-2.79843	0.0540466	-51.7781	0	0
XLOC_000922	74.4087	-5.02411	0.111917	-44.8916	0	0
XLOC_001094	208.837	-7.15346	0.114409	-62.5252	0	0
XLOC_001229	218.044	-6.14516	0.0957265	-64.195	0	0
XLOC_001310	649.873	-8.02218	0.10567	-75.9175	0	0
XLOC_001457	261.057	-5.73503	0.0769041	-74.5738	0	0
XLOC_001708	956.944	-7.011	0.0942447	-74.3915	0	0
XLOC_002066	823.519	-6.87733	0.0863458	-79.6487	0	0
XLOC_003550	114.842	-7.3571	0.154067	-47.7525	0	0
XLOC_003833	112.476	-7.19687	0.148557	-48.4451	0	0
XLOC_004047	1887.92	-6.96211	0.0716337	-97.1904	0	0
XLOC_004138	452.446	-6.87966	0.0963259	-71.4207	0	0
XLOC_004139	454.025	-7.23733	0.103297	-70.0636	0	0
XLOC_004195	258.891	-4.03717	0.077691	-51.9645	0	0
XLOC_004199	330.864	-6.8346	0.154685	-44.1841	0	0
XLOC_004831	175.953	-8.88142	0.185915	-47.7714	0	0
XLOC_005034	1219.48	2.02771	0.0444218	45.6467	0	0
XLOC_005404	426.712	-6.64579	0.144897	-45.8658	0	0
XLOC_005813	64.3117	-5.30751	0.114959	-46.1685	0	0
XLOC_006140	184.64	-6.14608	0.107228	-57.3177	0	0
XLOC_006415	505.741	-5.3337	0.067128	-79.4556	0	0
XLOC_006582	303.521	-3.4192	0.0799602	-42.7614	0	0
XLOC_006587	364.122	-5.94348	0.0791614	-75.0806	0	0
XLOC_007210	75.6989	-3.07296	0.0744678	-41.2656	0	0
XLOC_007339	151.346	-7.47993	0.175514	-42.6172	0	0
XLOC_007542	526.049	-6.31645	0.127301	-49.6184	0	0
XLOC_008558	57.5362	-6.38235	0.149663	-42.6448	0	0
XLOC_008665	163.328	-6.91391	0.142722	-48.4433	0	0
XLOC_008681	222.643	3.15342	0.0714825	44.1146	0	0
XLOC_008759	713.427	-4.21394	0.1004	-41.9713	0	0
XLOC_008806	99.3088	-5.59192	0.12417	-45.0342	0	0
XLOC_008870	48.2666	-7.85337	0.202371	-38.8069	0	0
XLOC_008886	343.334	-5.56928	0.0849536	-65.5567	0	0
XLOC_008908	472.394	-6.51648	0.0890371	-73.1884	0	0
XLOC_009295	430.946	-3.30938	0.0804262	-41.148	0	0
XLOC_009588	228.05	-3.86598	0.0629708	-61.3933	0	0
XLOC_009614	312.95	-5.10977	0.100969	-50.6075	0	0
XLOC_009627	249.048	-5.30053	0.0989349	-53.5759	0	0
XLOC_009670	427.908	-11.3357	0.231096	-49.0521	0	0
XLOC_009769	210.988	-4.84911	0.0825055	-58.7732	0	0
XLOC_009902	6259.14	-13.9207	0.263831	-52.7636	0	0
XLOC_009945	140.293	-6.74076	0.146104	-46.1368	0	0
XLOC_010363	189.933	-8.41244	0.182286	-46.1498	0	0
XLOC_010364	229.756	-9.56323	0.224534	-42.5914	0	0
XLOC_010457	283.66	-4.47742	0.0788315	-56.7973	0	0
XPO7	1206.99	1.0381	0.0228752	45.381	0	0
XRN1	8785.8	-3.45541	0.02027	-170.469	0	0
XRN2	2431.47	0.617398	0.015373	40.1611	0	0
XXYLT1	265.332	2.14119	0.0450657	47.5126	0	0
XXYLT1-AS2	91.7662	-6.3384	0.131769	-48.1025	0	0
YEATS2	2589.01	-1.02986	0.0231749	-44.4385	0	0
YIF1A	229.177	1.39442	0.0287162	48.5587	0	0
YIPF4	633.859	0.765527	0.017628	43.4269	0	0
YKT6	1082.71	0.560649	0.0128493	43.6327	0	0
YME1L1	6355.81	-1.103	0.0185968	-59.3112	0	0
YTHDF1	719.313	0.709054	0.0169839	41.7485	0	0
YWHAQ	4005.97	-0.738024	0.0191992	-38.4403	0	0
ZBP1	1363.32	-6.54941	0.0540202	-121.24	0	0
ZBTB10	2788.54	-3.92576	0.0588415	-66.7175	0	0
ZBTB43	1003.11	-1.63569	0.029307	-55.8121	0	0
ZBTB48	225.906	1.68332	0.0270466	62.2377	0	0
ZBTB7B	1065.69	1.40897	0.0333905	42.1967	0	0
ZC3H12C	4069.83	-5.03543	0.0782663	-64.337	0	0
ZC3H4	1205.52	-1.02276	0.0227212	-45.0137	0	0
ZC3HAV1	12008.7	-3.08039	0.0363504	-84.7417	0	0
ZCCHC10	611.597	-0.993669	0.0227111	-43.7526	0	0
ZCCHC17	322.049	0.922698	0.0207614	44.443	0	0
ZCCHC6	4403.16	-2.0911	0.0321509	-65.0403	0	0
ZCCHC7	451.158	1.06146	0.0279499	37.9773	0	0
ZDHHC3	832.24	0.670728	0.0163282	41.078	0	0
ZDHHC7	1347.02	1.27356	0.0273078	46.6372	0	0
ZEB2-AS1	173.046	-2.79503	0.0610002	-45.82	0	0
ZFAND6	1069.69	0.491968	0.0122161	40.2722	0	0
ZFAS1	1265.89	-2.08851	0.0353729	-59.0426	0	0
ZFP36L2	6094.02	-2.60145	0.0649658	-40.0434	0	0
ZFP69	185.325	2.19456	0.0511408	42.9122	0	0
ZFX	2096.28	-2.39334	0.0610121	-39.2274	0	0
ZFYVE21	296.217	1.67702	0.0244995	68.4513	0	0
ZKSCAN1	1300.63	1.12351	0.0184301	60.9608	0	0
ZMAT3	578.005	1.74865	0.0449492	38.9029	0	0
ZNF107	653.001	-1.63692	0.0349996	-46.7698	0	0
ZNF136	637.725	-1.34775	0.0321801	-41.8816	0	0
ZNF181	108.61	1.31791	0.0150219	87.7325	0	0
ZNF200	441.822	-1.62773	0.0354953	-45.8575	0	0
ZNF252P	228.384	1.61235	0.0275286	58.5698	0	0
ZNF267	4902.52	-2.14702	0.0351566	-61.0701	0	0
ZNF277	1266.15	-2.01987	0.031405	-64.3168	0	0
ZNF32	149.854	1.63349	0.0326503	50.0299	0	0
ZNF473	122.434	1.11214	0.0283314	39.2546	0	0
ZNF503	556.431	-5.9993	0.0716788	-83.6969	0	0
ZNF589	398.182	2.41639	0.042713	56.5727	0	0
ZNF618	1676.12	-2.49752	0.0431158	-57.9258	0	0
ZNF738	62.2525	0.773259	0.0190006	40.6966	0	0
ZNF768	305.012	2.19603	0.0346055	63.459	0	0
ZNF780B	159.721	1.81849	0.035575	51.117	0	0
ZNF786	68.3512	1.43294	0.0361355	39.6546	0	0
ZNF79	495.634	-3.95107	0.0628141	-62.9011	0	0
ZNF862	177.925	1.28541	0.0307407	41.8145	0	0
ZNFX1	22306.7	-3.64584	0.0247982	-147.021	0	0
ZNHIT1	404.8	0.893326	0.0236172	37.8252	0	0
ZNRF2	3138.11	-2.09053	0.0384911	-54.3121	0	0
ZSWIM6	1685.58	-1.32545	0.0294212	-45.0508	0	0
COG4	683.629	0.825167	0.0219996	37.5083	6.73741e-308	5.21927e-307
WSB1	2908.67	-0.808161	0.0215481	-37.5051	7.61773e-308	5.89844e-307
TMEM218	106.517	1.34972	0.0359921	37.5003	9.0991e-308	7.04214e-307
STAC	722.884	1.64641	0.0439046	37.4996	9.33895e-308	7.22435e-307
RXRA	1936.33	1.86355	0.0496986	37.4969	1.03375e-307	7.99301e-307
HDAC6	1197.85	-0.64703	0.0172615	-37.4841	1.67186e-307	1.29147e-306
SAMM50	293.208	1.6917	0.0451331	37.4825	1.77479e-307	1.37034e-306
N4BP2L1	1482.48	-1.58656	0.0423346	-37.4767	2.20819e-307	1.70418e-306
RABGGTA	736.683	-0.825289	0.0220257	-37.4694	2.90609e-307	2.24173e-306
RSF1	1198.75	-0.546286	0.014582	-37.463	3.68535e-307	2.8415e-306
FBXO34	1005.57	-0.873818	0.0233317	-37.452	5.56826e-307	4.29125e-306
ZDHHC17	790.593	-0.719809	0.0192196	-37.4518	5.61716e-307	4.3269e-306
CSAG3	75.3192	-8.94626	0.238892	-37.4489	6.2492e-307	4.8115e-306
SMCO4	498.209	-1.5239	0.0406961	-37.4458	7.02435e-307	5.40578e-306
CORO1B	1967.65	1.14476	0.0305768	37.4388	9.1529e-307	7.04056e-306
CUL9	74.288	1.66352	0.0444543	37.4209	1.78848e-306	1.37508e-305
MFN2	1590.12	0.828789	0.0221542	37.4101	2.67808e-306	2.05713e-305
EFHD2	2939.75	1.25259	0.0334962	37.3951	4.68947e-306	3.59709e-305
COMMD8	333.469	0.813174	0.0217564	37.3762	9.50862e-306	7.29024e-305
EEF2K	1339.02	1.22996	0.0329137	37.3691	1.23924e-305	9.49676e-305
FDX1	490.506	-1.54903	0.0414542	-37.3672	1.33462e-305	1.02229e-304
RCAN1	6766.39	-2.57577	0.0689331	-37.3663	1.3787e-305	1.05557e-304
TBC1D20	645.198	0.512404	0.0137147	37.3616	1.64498e-305	1.25885e-304
LOC100505676	463.462	2.46915	0.0661031	37.353	2.2642e-305	1.73029e-304
ING3	383.051	-0.995787	0.0266707	-37.3364	4.22059e-305	3.22085e-304
ACSL4	5573.52	-1.03389	0.0276929	-37.3339	4.62059e-305	3.52446e-304
ETS2	4711.03	-3.36583	0.0902412	-37.2981	1.7603e-304	1.34146e-303
PCNX	2356.08	-1.55431	0.0416783	-37.2931	2.12469e-304	1.6184e-303
RASGEF1B	1840.85	-2.59603	0.0696255	-37.2856	2.81268e-304	2.14145e-303
FAM78A	1004.48	1.59496	0.0427801	37.2829	3.10797e-304	2.36518e-303
CBWD5	187.366	-2.4469	0.0656327	-37.2818	3.24123e-304	2.46544e-303
SLC7A6	427.85	1.97357	0.0529466	37.2747	4.21798e-304	3.20692e-303
SNX12	777.604	0.953092	0.0255733	37.269	5.21508e-304	3.96317e-303
MAX	2061.94	-1.04336	0.0280093	-37.2503	1.04852e-303	7.95709e-303
XLOC_007737	29.4733	-5.97424	0.160398	-37.2464	1.21393e-303	9.20814e-303
RGS2	759.669	-2.6495	0.0711461	-37.2403	1.52224e-303	1.15361e-302
KIAA0100	1363.69	1.63104	0.0438022	37.2364	1.75775e-303	1.33086e-302
TRIM14	2570.22	-1.68011	0.0451249	-37.2324	2.0404e-303	1.54343e-302
CTDSPL2	1119.58	-0.712148	0.0191363	-37.2145	3.98219e-303	3.01089e-302
PLCL1	1105.77	-2.31816	0.0622929	-37.2139	4.06086e-303	3.06896e-302
TAGAP	1813.19	-2.01128	0.0541568	-37.1381	6.82639e-302	5.14238e-301
TCEB2	3667.01	0.687084	0.0185162	37.1072	2.14846e-301	1.61623e-300
PCYOX1L	145.92	2.40721	0.0648729	37.1066	2.19982e-301	1.6541e-300
MRPL3	650.099	1.43511	0.0386923	37.0904	4.01568e-301	3.01673e-300
TAF1D	527.089	-1.39616	0.0376546	-37.078	6.36606e-301	4.78023e-300
BPNT1	193.662	1.32213	0.0356595	37.0766	6.70397e-301	5.03166e-300
BLVRA	4013.64	-1.21633	0.0328084	-37.0736	7.4941e-301	5.62212e-300
ZNF106	2518.5	0.636404	0.0171697	37.0656	1.00792e-300	7.558e-300
HBEGF	689.027	-4.2867	0.115686	-37.0547	1.50801e-300	1.12925e-299
LOC100506746	192.776	-1.58979	0.0429052	-37.0537	1.56631e-300	1.17237e-299
TP53I13	361.141	1.1108	0.0299834	37.0472	1.99507e-300	1.49262e-299
TTL	1614.77	1.19602	0.0322945	37.0347	3.16162e-300	2.36429e-299
XLOC_009742	32.6858	-6.16153	0.166425	-37.0229	4.91032e-300	3.67031e-299
ATMIN	920.204	0.538218	0.014542	37.0111	7.5797e-300	5.66301e-299
NFKBID	556.108	-1.89385	0.0511849	-37.0001	1.14003e-299	8.51364e-299
GPR132	1299.03	-2.13925	0.0578562	-36.9754	2.85017e-299	2.12557e-298
ORAI3	350.217	1.88807	0.0510862	36.9586	5.29861e-299	3.94795e-298
GADD45A	3453.91	-2.9953	0.0810455	-36.9583	5.36777e-299	3.99766e-298
EIF2AK4	1063.33	1.35387	0.0366351	36.9556	5.91401e-299	4.40247e-298
THYN1	186.543	1.65491	0.0448084	36.9331	1.362e-298	1.01251e-297
CAPRIN2	263.198	1.76964	0.0479205	36.9288	1.59485e-298	1.18508e-297
SCARB1	3603.48	2.17572	0.0589222	36.9253	1.81822e-298	1.35044e-297
ANKRD52	1220.46	0.90697	0.0245687	36.9157	2.58784e-298	1.91945e-297
LOC155060	176.542	1.01664	0.0275456	36.9076	3.48565e-298	2.58421e-297
SPAG1	51.1753	-1.98049	0.053663	-36.9061	3.6829e-298	2.72921e-297
SNRPD3	881.377	1.02072	0.0276697	36.8896	6.7929e-298	5.02706e-297
SLC17A9	212.336	2.20096	0.0597252	36.8514	2.77282e-297	2.04924e-296
TULP3	437.477	1.52214	0.0413148	36.8424	3.86679e-297	2.85644e-296
PDHB	903.755	1.23259	0.0334807	36.8148	1.06925e-296	7.89158e-296
NCKIPSD	343.971	1.4133	0.0384226	36.783	3.44612e-296	2.54111e-295
ZNF280D	367.642	1.26615	0.034461	36.7417	1.57883e-295	1.16316e-294
SRD5A1	663.544	-1.13118	0.0308125	-36.7118	4.72954e-295	3.47653e-294
NUDT16L1	139.497	1.47604	0.0402089	36.7094	5.16707e-295	3.79644e-294
NFKB2	3355.08	-1.92656	0.0524864	-36.7058	5.90483e-295	4.33656e-294
GRHL1	187.777	-3.3771	0.0921124	-36.6628	2.86266e-294	2.09767e-293
PICK1	176.557	1.42399	0.0388521	36.6517	4.3022e-294	3.1511e-293
SRPRB	424.32	1.23786	0.0337746	36.6505	4.49564e-294	3.29132e-293
UQCRC2	2476.41	0.91449	0.0249624	36.6346	8.03655e-294	5.87579e-293
KDM6B	1817.35	-2.01709	0.055061	-36.6337	8.32414e-294	6.08334e-293
MAP1LC3C	40.0158	3.59578	0.0981556	36.6335	8.39195e-294	6.13016e-293
BPGM	867.672	-1.54584	0.0422126	-36.6204	1.35446e-293	9.8897e-293
PTGS1	1806.58	1.68754	0.0461022	36.6044	2.43166e-293	1.77391e-292
FRS2	552.615	-0.755927	0.0206541	-36.5995	2.91681e-293	2.12689e-292
TPP2	1829.72	0.595384	0.016271	36.5917	3.88262e-293	2.82988e-292
TP53INP1	446.195	1.70771	0.046676	36.5864	4.70312e-293	3.42638e-292
SEPHS2	1460.49	1.22568	0.0335023	36.5849	4.96601e-293	3.6163e-292
ANKRD44	1892.97	0.984804	0.026939	36.5569	1.387e-292	1.00868e-291
SZRD1	3086.02	-0.422316	0.011558	-36.5389	2.68012e-292	1.94736e-291
EIF4B	3373.71	1.35104	0.0370197	36.4951	1.32585e-291	9.61655e-291
TNFRSF10B	2766.51	-1.45703	0.0399355	-36.4845	1.95153e-291	1.41484e-290
HDGFRP2	339.785	1.11762	0.0306333	36.4837	2.01014e-291	1.45669e-290
CBR4	142.181	1.37897	0.0377979	36.4827	2.0883e-291	1.51266e-290
PPHLN1	758.929	0.988326	0.0270922	36.4801	2.29237e-291	1.65974e-290
DCBLD1	479.93	-1.31678	0.0361229	-36.4528	6.20221e-291	4.48661e-290
DIRC2	1648.84	1.48599	0.0407749	36.4437	8.66663e-291	6.26382e-290
TMEM236	1068.39	1.5729	0.0431622	36.4415	9.37452e-291	6.76649e-290
SESTD1	741.771	-1.11159	0.030576	-36.355	2.18847e-289	1.57616e-288
HAGHL	42.3133	2.39687	0.0659321	36.3536	2.30744e-289	1.66038e-288
NEU4	120.772	-6.76239	0.186059	-36.3453	3.11436e-289	2.24004e-288
ELP2	936.521	1.90139	0.0523476	36.3224	7.159e-289	5.14695e-288
CD7	386.128	-3.06395	0.084391	-36.3066	1.27076e-288	9.13206e-288
TMOD3	3712.86	-0.632086	0.0174119	-36.302	1.50652e-288	1.08168e-287
G6PC3	496.289	0.911958	0.0251223	36.3007	1.57486e-288	1.13026e-287
RAB34	365.581	1.27013	0.035019	36.2696	4.88219e-288	3.49929e-287
DSC2	366.543	2.14651	0.0592033	36.2567	7.80606e-288	5.59252e-287
PLAUR	5484.6	-2.20711	0.0608878	-36.2488	1.03641e-287	7.42194e-287
NFAT5	1600.57	-1.71649	0.0473688	-36.2367	1.61168e-287	1.15365e-286
XLOC_008326	167.857	-3.71286	0.102507	-36.2204	2.90572e-287	2.07903e-286
VPS8	898.045	1.02726	0.0283778	36.1996	6.17089e-287	4.40947e-286
PPP1R18	8513.59	-1.04538	0.0289134	-36.1556	3.03679e-286	2.16525e-285
ANAPC11	325.518	0.652936	0.0180752	36.1234	9.74431e-286	6.93568e-285
SERPINB1	3661.22	-1.143	0.0316638	-36.0981	2.42844e-285	1.72623e-284
TFEB	195.487	1.45388	0.0403043	36.0727	6.08758e-285	4.32543e-284
ERCC1	320.399	1.18298	0.0328046	36.0615	9.09645e-285	6.45494e-284
MKKS	664.036	1.06162	0.0294402	36.0602	9.55336e-285	6.77623e-284
ENOPH1	553.347	0.863774	0.0239601	36.0505	1.35544e-284	9.61001e-284
TRIM6-TRIM34	1149.6	-0.999792	0.0277399	-36.0417	1.86117e-284	1.31899e-283
WNT5B	804.668	1.18068	0.0327671	36.0326	2.58002e-284	1.82685e-283
SH2B3	4172.87	-1.03138	0.0286262	-36.0292	2.91904e-284	2.06601e-283
CRTC3	746.303	0.748364	0.0207768	36.0191	4.19775e-284	2.96977e-283
SLC25A11	755.156	0.764961	0.0212455	36.0058	6.79694e-284	4.80653e-283
OIP5-AS1	1618.96	1.40183	0.0389347	36.0045	7.11089e-284	5.02638e-283
COMMD2	496.604	0.891716	0.0247689	36.0015	7.93338e-284	5.60534e-283
VTI1B	1676.3	0.62752	0.017433	35.9962	9.59293e-284	6.77498e-283
NABP1	7336.62	-1.56691	0.0435313	-35.995	1.00165e-283	7.07107e-283
TXNDC12	1398.58	0.582221	0.0161785	35.9873	1.32394e-283	9.34222e-283
BTG2	4420.11	-2.05773	0.0571931	-35.9787	1.80473e-283	1.27239e-282
CXXC1	460.205	0.938026	0.0260768	35.9716	2.32342e-283	1.63738e-282
SREK1IP1	366.632	0.892021	0.0247999	35.9687	2.57795e-283	1.81597e-282
POLD4	469.197	1.24848	0.0347188	35.9598	3.55795e-283	2.50523e-282
MAPKAP1	1089.16	0.99426	0.0276554	35.9517	4.75986e-283	3.35009e-282
ELOVL5	2899.32	-1.10256	0.0306735	-35.945	6.06796e-283	4.26893e-282
CXCL1	8504.14	-4.10473	0.114278	-35.9188	1.5518e-282	1.09126e-281
DROSHA	1197.29	-0.657002	0.0182978	-35.9061	2.45163e-282	1.72329e-281
FPR3	38976.8	-1.18432	0.0329966	-35.892	4.06517e-282	2.85625e-281
PPP2R5D	505.793	1.06982	0.0298096	35.8884	4.63052e-282	3.25208e-281
HEATR5B	637.713	0.825007	0.0229888	35.8873	4.81403e-282	3.37951e-281
PRDM1	3416.75	-1.87064	0.0521284	-35.8853	5.18099e-282	3.63556e-281
PPP1R21	525.06	0.964389	0.0268908	35.8632	1.1443e-281	8.02627e-281
INPP5K	366.566	1.38848	0.0387248	35.8552	1.52839e-281	1.07111e-280
BRD4	1354.62	-0.728487	0.020318	-35.8543	1.57701e-281	1.10471e-280
ACBD6	146.747	1.33395	0.0372054	35.8537	1.60764e-281	1.12569e-280
XLOC_007552	24.1657	-4.52339	0.126306	-35.813	6.93549e-281	4.85218e-280
PLEKHB2	6581.05	0.732661	0.0204654	35.8	1.10606e-280	7.7283e-280
NIF3L1	246.947	1.15753	0.032334	35.7991	1.13884e-280	7.95395e-280
GOLGA1	440.188	0.595937	0.0166487	35.7947	1.33416e-280	9.31411e-280
BTN3A3	956.081	-1.5987	0.0446675	-35.7912	1.51619e-280	1.05759e-279
GLE1	920.892	0.435623	0.0121728	35.7864	1.79531e-280	1.25175e-279
RCN2	208.873	1.66695	0.0465972	35.7737	2.83467e-280	1.97475e-279
UFC1	914.848	0.720071	0.0201469	35.741	9.12052e-280	6.34565e-279
RAB11FIP3	173.694	1.42445	0.0398856	35.7133	2.4572e-279	1.70816e-278
DENND4A	1947.04	-1.72202	0.0482407	-35.6964	4.50192e-279	3.12428e-278
XLOC_003348	38.4248	-4.04008	0.1132	-35.6896	5.72214e-279	3.96942e-278
SOS1	3489.4	-1.03793	0.0290847	-35.6866	6.38318e-279	4.4261e-278
CIITA	6028.8	1.28905	0.0361266	35.6816	7.63894e-279	5.29461e-278
MRPL24	214.324	1.25997	0.0353371	35.6559	1.90994e-278	1.32156e-277
TRAPPC8	1294.95	0.431363	0.0121122	35.614	8.49924e-278	5.87103e-277
TOMM34	1626.54	-2.29496	0.0644409	-35.6134	8.69116e-278	6.00107e-277
ELP3	487.819	0.829373	0.0232983	35.598	1.50549e-277	1.03907e-276
AEBP2	940.067	-1.43882	0.0404359	-35.5828	2.58813e-277	1.78555e-276
EMC1	773.063	0.967373	0.0271995	35.5658	4.73139e-277	3.26006e-276
TET3	1959.61	0.782348	0.0219983	35.5641	5.02788e-277	3.4629e-276
LYRM2	549.272	0.638659	0.0179819	35.5168	2.70114e-276	1.85804e-275
PPP1R15B	3404.81	-1.62289	0.0457744	-35.454	2.51273e-275	1.72265e-274
DRAM1	5146.31	-2.80062	0.0790454	-35.4305	5.79389e-275	3.97046e-274
COPS4	391.306	0.920618	0.0259921	35.4192	8.64481e-275	5.92168e-274
NELFB	631.129	0.749768	0.0211842	35.3927	2.20764e-274	1.50845e-273
CDC123	741.886	0.997774	0.0281941	35.3895	2.47705e-274	1.69183e-273
THEMIS2	4685.77	-1.3973	0.0394843	-35.3887	2.5435e-274	1.73649e-273
CSNK1E	268.934	1.47002	0.0415716	35.361	6.78784e-274	4.62838e-273
SMG6	633.953	0.851197	0.0240722	35.3602	6.98753e-274	4.76256e-273
XLOC_008811	34.8925	-2.84866	0.0805644	-35.3588	7.34762e-274	5.00591e-273
EDEM1	9967.65	-1.69411	0.0479122	-35.3586	7.39745e-274	5.03777e-273
MYO10	598.11	-2.71283	0.0767358	-35.3529	9.03683e-274	6.15165e-273
ARFGAP1	664.902	0.641311	0.0181504	35.3332	1.81722e-273	1.2355e-272
TOP1MT	174.522	1.76146	0.0498594	35.3285	2.14464e-273	1.4575e-272
GCN1L1	1658.91	0.847706	0.0240052	35.3135	3.65024e-273	2.47865e-272
SMC4	1685.12	-1.81695	0.0514648	-35.3047	4.96862e-273	3.37109e-272
SEL1L	2846.02	0.681259	0.0192975	35.3029	5.30437e-273	3.59741e-272
POP5	126.471	1.33086	0.0377082	35.2936	7.35813e-273	4.98613e-272
FNDC3B	5626.68	-1.69891	0.0481536	-35.281	1.14927e-272	7.78465e-272
ABI2	190.254	1.4969	0.0424502	35.2625	2.20344e-272	1.49128e-271
HIST1H2AC	519.592	-1.73549	0.0492162	-35.2624	2.21159e-272	1.49618e-271
RPE	862.56	0.755917	0.021459	35.2261	7.96588e-272	5.38461e-271
POLR2L	396.622	1.03019	0.0292633	35.2041	1.73269e-271	1.16978e-270
VPS52	818.456	0.556934	0.0158296	35.183	3.6384e-271	2.45536e-270
LRRC58	1103.08	0.800597	0.022756	35.1818	3.79242e-271	2.55825e-270
CTNNBIP1	332.415	2.12453	0.0603963	35.1765	4.57482e-271	3.08222e-270
SEC24B	1249.13	-0.460382	0.0130886	-35.1743	4.93769e-271	3.32533e-270
COPS6	449.498	0.758844	0.0215816	35.1617	7.70378e-271	5.18605e-270
XLOC_006057	26.525	-4.83124	0.137429	-35.1545	9.9327e-271	6.68103e-270
SLCO2B1	10054.3	2.40886	0.0685403	35.1452	1.37486e-270	9.23259e-270
AK001351	318.037	-4.00052	0.113887	-35.1272	2.5892e-270	1.7373e-269
RGS12	184.056	1.54394	0.0439624	35.1195	3.40067e-270	2.27991e-269
SLC38A10	1508.31	0.738781	0.0210426	35.1089	4.9374e-270	3.30882e-269
CPSF7	1128.16	0.497967	0.014185	35.1053	5.60411e-270	3.75256e-269
FAM57A	197.703	-2.51968	0.071812	-35.0871	1.05996e-269	7.08602e-269
TNK2	1361.27	-0.899382	0.0256344	-35.0849	1.14469e-269	7.64931e-269
ATP5F1	1803.13	1.07323	0.030594	35.0799	1.36564e-269	9.11839e-269
DUSP23	140.377	1.52843	0.0435797	35.072	1.80375e-269	1.20387e-268
USP19	1119.08	0.48626	0.0138677	35.0642	2.37153e-269	1.58153e-268
HRH1	729.178	3.46614	0.0989551	35.0274	8.60286e-269	5.73244e-268
DMRTA2	270.559	-12.2206	0.34892	-35.024	9.71984e-269	6.46884e-268
QSER1	2290.1	-0.769761	0.0219921	-35.0017	2.11885e-268	1.40902e-267
CHORDC1	990.888	-0.949181	0.0271227	-34.9958	2.60771e-268	1.7334e-267
CTBP1	993.569	1.03763	0.0296558	34.9891	3.29377e-268	2.18855e-267
FLVCR2	1461.78	1.59966	0.0457277	34.9822	4.19665e-268	2.78734e-267
HNRNPK	12199.4	-0.468521	0.013395	-34.9773	4.98944e-268	3.31255e-267
NCKAP1L	9965.59	0.85341	0.024405	34.9687	6.73559e-268	4.47003e-267
PRPF6	1111.09	0.615146	0.0175925	34.9663	7.31863e-268	4.85499e-267
HNRNPC	9485.11	-0.846024	0.0242053	-34.952	1.20712e-267	8.00447e-267
SNX10	6537.56	-2.69284	0.0770567	-34.9462	1.4771e-267	9.79078e-267
EFTUD1	892.417	-0.655342	0.0187564	-34.9396	1.86066e-267	1.23282e-266
IFITM2	1749.32	-2.38922	0.0683846	-34.938	1.96958e-267	1.30446e-266
ZCCHC2	2701.62	-1.1439	0.0327432	-34.9355	2.14669e-267	1.42119e-266
ZNF629	441.862	0.765104	0.0219036	34.9305	2.5606e-267	1.69452e-266
DUOX1	1063.86	2.03956	0.058398	34.9251	3.08821e-267	2.04286e-266
SIGMAR1	322.74	1.32131	0.0378375	34.9208	3.59837e-267	2.37841e-266
DNMT1	4552.93	1.35652	0.0388539	34.9134	4.65391e-267	3.0736e-266
CDR2	284.109	1.75368	0.0502552	34.8955	8.68968e-267	5.73666e-266
TTC7A	3751.93	1.13787	0.0326134	34.8897	1.06653e-266	7.03805e-266
CAPN10	44.7233	1.17625	0.0337283	34.8741	1.83393e-266	1.20973e-265
XRCC1	349.892	0.883128	0.0253236	34.8737	1.86524e-266	1.22989e-265
DGKZ	994.29	1.16199	0.0333433	34.8493	4.37004e-266	2.8757e-265
TMEM71	212.564	3.19477	0.0916816	34.8463	4.83587e-266	3.18096e-265
QRICH1	1292.46	0.493851	0.0141811	34.8247	1.02715e-265	6.74289e-265
CA8	42.0759	-4.1392	0.118897	-34.8134	1.52675e-265	1.00186e-264
SENP3	232.52	1.04172	0.0299302	34.8051	2.03649e-265	1.33529e-264
ALG3	224.744	1.38991	0.0399379	34.8018	2.28596e-265	1.49826e-264
RHOT1	820.209	0.700958	0.0201452	34.7953	2.86916e-265	1.87975e-264
LRRC1	118.468	-3.11708	0.0895917	-34.7921	3.2018e-265	2.09684e-264
VIPAS39	498.45	0.558639	0.0160597	34.7851	4.08586e-265	2.67367e-264
CARKD	346.807	0.542216	0.0155881	34.784	4.23892e-265	2.77272e-264
HLX	1830.25	-1.44664	0.0415905	-34.783	4.39984e-265	2.87683e-264
HLA-DMB	7445.32	1.13772	0.0327177	34.7737	6.07456e-265	3.96868e-264
VANGL2	65.4898	-3.00647	0.0864763	-34.7664	7.83569e-265	5.11723e-264
ANKRD33B	1772.14	-3.06382	0.0881667	-34.7503	1.3727e-264	8.96107e-264
C16orf58	387.121	1.05672	0.0304295	34.7268	3.10387e-264	2.02462e-263
CCNA1	1598.96	-1.7333	0.0499202	-34.7214	3.75071e-264	2.44459e-263
GALE	175.556	1.58871	0.0457654	34.7143	4.78902e-264	3.11885e-263
SMIM4	71.3246	1.46357	0.0421626	34.7125	5.10905e-264	3.32595e-263
C6orf203	101.409	1.0981	0.0316406	34.7055	6.51216e-264	4.23769e-263
C1orf35	76.1406	1.3793	0.0397487	34.7005	7.7296e-264	5.02792e-263
LTA	148.141	-5.76443	0.166212	-34.6811	1.5167e-263	9.86184e-263
REXO4	295.297	0.863281	0.0248948	34.6771	1.74454e-263	1.13388e-262
XLOC_006850	27.1876	-6.83807	0.197196	-34.6765	1.78025e-263	1.15663e-262
CDK12	1556.38	-0.519058	0.0149697	-34.674	1.94185e-263	1.26063e-262
GPR34	132.845	3.80997	0.110028	34.6274	9.79108e-263	6.34369e-262
PLSCR3	221.144	1.23731	0.035741	34.6188	1.31839e-262	8.53182e-262
ATM	1957.72	1.02379	0.029584	34.6063	2.03328e-262	1.31529e-261
ST6GALNAC4	86.6453	1.96671	0.0568342	34.6043	2.18011e-262	1.40917e-261
ARIH1	1704.72	-0.762177	0.0220377	-34.5852	4.2227e-262	2.72621e-261
NDUFC1	555.763	-0.803202	0.0232331	-34.5715	6.77686e-262	4.37348e-261
RABL6	950.88	1.19492	0.0345692	34.5659	8.21575e-262	5.29998e-261
DCAF7	892.296	0.617216	0.017858	34.5625	9.26626e-262	5.97532e-261
TMEM150B	1375.64	-1.44874	0.0419239	-34.5563	1.14542e-261	7.38039e-261
AIM1	4703.7	-1.0385	0.0300586	-34.5492	1.46387e-261	9.42859e-261
LILRA5	574.272	-3.12252	0.0904349	-34.5278	3.06592e-261	1.97394e-260
CREB3	909.125	-0.765904	0.0221896	-34.5164	4.54844e-261	2.92614e-260
LOC100507217	628.14	-1.27041	0.0368116	-34.5111	5.47611e-261	3.52156e-260
ARPC1A	589.088	0.481752	0.0139603	34.5087	5.94333e-261	3.82051e-260
ACOX1	882.682	0.664883	0.0192719	34.5001	8.00455e-261	5.14148e-260
AKNAD1	512.573	0.722046	0.0209321	34.4947	9.62008e-261	6.17433e-260
ZMYM6	696.724	1.09944	0.0318865	34.4799	1.6077e-260	1.02983e-259
CKB	480.234	-2.74277	0.0795897	-34.4613	3.04827e-260	1.95184e-259
UBE2M	398.166	0.765988	0.0222306	34.4565	3.59839e-260	2.30319e-259
MLST8	190.086	0.908292	0.0263663	34.449	4.66445e-260	2.98204e-259
PHLDA2	288.028	-2.40446	0.0697993	-34.4482	4.78726e-260	3.05937e-259
HNRNPUL2-BSCL2	4893.06	0.679242	0.0197189	34.4462	5.14052e-260	3.28384e-259
REL	5052.84	-2.29707	0.0667138	-34.4316	8.47711e-260	5.41109e-259
DICER1	4678.79	-1.6746	0.0486498	-34.4215	1.20094e-259	7.65686e-259
2018-09-09	3337.45	1.39018	0.0403913	34.4178	1.36374e-259	8.69148e-259
XLOC_007623	131.885	3.96501	0.115266	34.3987	2.63339e-259	1.67637e-258
CXCL10	117303	-6.48339	0.188524	-34.3902	3.53231e-259	2.24774e-258
MYADM	1142.28	-1.27014	0.0369338	-34.3897	3.59565e-259	2.28715e-258
RBAK-RBAKDN	973.519	-2.0001	0.0581885	-34.3728	6.42747e-259	4.08686e-258
TYMP	11914	-1.55702	0.0453114	-34.3626	9.12481e-259	5.79969e-258
NAIP	3912.19	2.11271	0.0615317	34.3354	2.3276e-258	1.47712e-257
BAG5	1005.87	0.617776	0.0179961	34.3284	2.95783e-258	1.87634e-257
SNX17	1802.48	0.928037	0.0270369	34.3249	3.34222e-258	2.11691e-257
CD69	435.399	-3.10496	0.0904816	-34.3159	4.5394e-258	2.87186e-257
AP3B1	1930.87	0.709272	0.0206756	34.3048	6.65108e-258	4.19809e-257
ULK3	241.85	1.56137	0.0455233	34.2981	8.36518e-258	5.27799e-257
CAPN1	2732.83	0.627837	0.0183183	34.2737	1.93338e-257	1.21892e-256
HINT3	1258.39	-0.931469	0.0271852	-34.2638	2.71955e-257	1.71392e-256
STK4	6751.17	-1.39517	0.0407261	-34.2574	3.38067e-257	2.12974e-256
TRIAP1	202.433	1.39615	0.040758	34.2546	3.72085e-257	2.34315e-256
MRPL2	109.415	1.20154	0.0351148	34.2175	1.32809e-256	8.34739e-256
SLFN5	9296.74	-2.52688	0.0738517	-34.2156	1.41782e-256	8.90795e-256
CTNS	769.8	1.68232	0.0491791	34.2082	1.82888e-256	1.14818e-255
MIR5095	278.82	0.748615	0.0218868	34.2039	2.11216e-256	1.32552e-255
LOC100128993	41.6614	-3.84339	0.112378	-34.2005	2.37705e-256	1.49119e-255
ZNF518B	345.05	0.779981	0.022812	34.1917	3.21014e-256	2.01303e-255
STK32C	468.75	2.47722	0.0724548	34.1899	3.41911e-256	2.14325e-255
FZD2	940.411	1.61759	0.0473137	34.1885	3.58222e-256	2.24464e-255
UHRF1BP1	2505.73	-1.14697	0.0335634	-34.1732	6.05434e-256	3.79224e-255
SMARCAD1	476.231	1.06463	0.0311724	34.1531	1.20336e-255	7.52593e-255
XLOC_001334	24.2909	-6.59783	0.193201	-34.1501	1.33458e-255	8.34344e-255
CNBP	5487.26	1.0926	0.0320057	34.1377	2.03448e-255	1.27093e-254
CRTAP	1427.81	1.05478	0.0308993	34.1363	2.13825e-255	1.33525e-254
HDLBP	5809.34	0.490067	0.0143564	34.1357	2.18321e-255	1.3628e-254
POGLUT1	1804.08	-2.40042	0.0703621	-34.1153	4.37335e-255	2.72889e-254
SELK	1151.96	-1.34496	0.0394261	-34.1134	4.67444e-255	2.91565e-254
DUSP12	139.587	0.781715	0.0229236	34.1009	7.14716e-255	4.45122e-254
VAMP2	375.478	0.895498	0.0262615	34.0992	7.57316e-255	4.71474e-254
AMD1	4172.19	-1.21459	0.0356296	-34.0894	1.05911e-254	6.58858e-254
CHD1	1371.77	-0.819835	0.0240503	-34.0884	1.09711e-254	6.82236e-254
XLOC_010171	72.6248	-9.23649	0.270961	-34.0879	1.11385e-254	6.92387e-254
FAM189B	1482.34	-0.640634	0.0187937	-34.0876	1.12608e-254	6.99723e-254
STAU2	398.48	0.989994	0.0290523	34.0762	1.65876e-254	1.03033e-253
XLOC_002712	213.562	-2.24126	0.0657769	-34.0736	1.81554e-254	1.12729e-253
EAF1	1055.19	-1.29336	0.0379664	-34.0658	2.36885e-254	1.47029e-253
TIMM44	166.497	1.21887	0.0358214	34.0263	9.09868e-254	5.64304e-253
TRMT44	227.75	-1.43087	0.0420599	-34.0197	1.13764e-253	7.04767e-253
TM6SF1	525.998	1.27393	0.0374507	34.0161	1.2891e-253	7.97996e-253
FCGR1A	136.592	-3.68293	0.108296	-34.0079	1.70268e-253	1.05362e-252
MARVELD1	270.442	1.86659	0.0548907	34.0056	1.84014e-253	1.13825e-252
HLA-B	42977.5	-0.976995	0.0287327	-34.0029	2.01563e-253	1.24633e-252
UQCR10	663.368	0.865614	0.0254776	33.9755	5.13038e-253	3.1675e-252
C4orf32	1610.12	-1.41014	0.0415069	-33.9738	5.43455e-253	3.35404e-252
CBX1	651.06	1.35568	0.0399176	33.962	8.11054e-253	4.99805e-252
C11orf21	297.877	2.37599	0.0699646	33.9599	8.72011e-253	5.3709e-252
INHBA	7697.75	-5.01715	0.147738	-33.9599	8.72214e-253	5.3709e-252
ZMYM3	681.955	1.3254	0.0390367	33.9527	1.11329e-252	6.8528e-252
MEA1	601.082	0.882444	0.0259913	33.9515	1.15896e-252	7.13127e-252
EIF4EBP1	167.433	1.81643	0.0535019	33.9508	1.18547e-252	7.29162e-252
REEP4	408.322	1.20704	0.0355664	33.9376	1.85891e-252	1.14296e-251
GLG1	2902.01	0.71024	0.0209305	33.9333	2.14864e-252	1.3206e-251
NAA40	410.106	2.37414	0.0700025	33.9151	3.99523e-252	2.45097e-251
EIF3D	3158.35	0.734726	0.0216662	33.9112	4.55681e-252	2.79339e-251
CECR5	297.094	1.12583	0.0332024	33.9081	5.06215e-252	3.10201e-251
UQCC	312.936	1.0939	0.032266	33.9027	6.07536e-252	3.7215e-251
SHPK	175.845	1.9286	0.0568906	33.9002	6.61475e-252	4.05039e-251
TMEM205	220.094	0.909681	0.0268425	33.8896	9.47556e-252	5.79781e-251
SLC30A9	865.316	0.691829	0.0204196	33.8806	1.28716e-251	7.86988e-251
PPP1R9B	2795.5	0.781839	0.0230822	33.8719	1.72853e-251	1.05645e-250
VAMP5	1917.54	-0.879681	0.0259728	-33.8693	1.88813e-251	1.15357e-250
UBXN2B	424	1.05635	0.0311936	33.8641	2.24866e-251	1.37282e-250
FCHO1	287.045	2.46635	0.072838	33.8607	2.52323e-251	1.53929e-250
CPPED1	1618.58	1.20482	0.0356022	33.8412	4.8838e-251	2.97603e-250
NPEPL1	272.427	1.26013	0.0372394	33.8384	5.36733e-251	3.26947e-250
MTDH	3469.29	0.730399	0.0215988	33.8166	1.12353e-250	6.83373e-250
CPNE2	1077.28	-1.31357	0.0388603	-33.8023	1.82744e-250	1.11069e-249
TRAF3IP2	221.117	-3.01832	0.0893002	-33.7997	1.99065e-250	1.20899e-249
LINC00339	108.483	1.44273	0.0427134	33.7771	4.27816e-250	2.59635e-249
STARD3	993.306	0.925422	0.0274154	33.7556	8.85104e-250	5.36959e-249
KLHL24	658.834	1.49452	0.0442808	33.7509	1.03705e-249	6.28908e-249
AGPAT1	1184.71	1.5988	0.0473715	33.7502	1.06257e-249	6.44142e-249
MAP1S	861.411	1.19565	0.0354317	33.7451	1.26292e-249	7.65313e-249
COMMD3-BMI1	823.663	0.59735	0.0177024	33.7441	1.30545e-249	7.90795e-249
NAB1	1225.83	-1.06882	0.031681	-33.737	1.65898e-249	1.00458e-248
MAP3K2	1979.71	0.675512	0.0200232	33.7366	1.68311e-249	1.01881e-248
BTBD10	505.814	0.928409	0.0275199	33.7359	1.72069e-249	1.04118e-248
ARMC6	310.129	1.11644	0.0330982	33.7311	2.0241e-249	1.22432e-248
ZFAND2B	223.217	0.842225	0.0249696	33.7301	2.0939e-249	1.26607e-248
ARMCX1	736.991	-2.3609	0.0700039	-33.7252	2.46668e-249	1.49037e-248
IL2RA	992.718	-3.82367	0.113437	-33.7073	4.52192e-249	2.73115e-248
XLOC_007878	240.793	-10.4846	0.311139	-33.6975	6.28189e-249	3.79134e-248
TOE1	314.813	-1.75719	0.0521838	-33.6731	1.43018e-248	8.62844e-248
CLK3	555.239	-0.698993	0.0207611	-33.6684	1.67821e-248	1.01211e-247
BIRC6	2952.58	0.641067	0.0190495	33.6527	2.84423e-248	1.7147e-247
RRBP1	5156.85	-1.03789	0.0308421	-33.6519	2.92749e-248	1.76424e-247
VPS11	1166.31	0.58622	0.0174263	33.64	4.36103e-248	2.62527e-247
XLOC_010626	124.175	-3.38647	0.100709	-33.6263	6.9286e-248	4.16937e-247
CHEK2	692.841	-2.16784	0.0644997	-33.61	1.1976e-247	7.19875e-247
RB1CC1	727.989	0.75313	0.0224087	33.6089	1.24503e-247	7.48114e-247
SPAST	728.012	0.650763	0.0193809	33.5774	3.58116e-247	2.1487e-246
ASNA1	953.781	0.584432	0.017406	33.5766	3.6879e-247	2.21193e-246
POLD1	621.686	1.68146	0.0500824	33.5738	4.04397e-247	2.4246e-246
C4orf3	3659.63	-1.06609	0.0317612	-33.5658	5.30238e-247	3.17794e-246
EIF3A	5275.68	0.544474	0.0162224	33.5631	5.80801e-247	3.47971e-246
CNOT6	743.934	0.649278	0.01937	33.5198	2.48353e-246	1.48576e-245
USP5	969.964	1.16093	0.0346526	33.502	4.51093e-246	2.69669e-245
NDUFB7	295.1	0.9543	0.0284886	33.4976	5.21849e-246	3.1174e-245
FAF2	1005.79	0.50881	0.0151898	33.4967	5.37699e-246	3.21092e-245
METTL22	37.7525	1.33501	0.0398675	33.4862	7.66671e-246	4.57491e-245
MOSPD1	113.242	1.51442	0.0452266	33.4852	7.9194e-246	4.72397e-245
CARS2	317.67	1.16608	0.0348281	33.4811	9.07778e-246	5.41299e-245
OSTC	906.041	0.740335	0.0221287	33.4559	2.11173e-245	1.25783e-244
SIDT2	7738.76	-1.28425	0.0383877	-33.4547	2.20153e-245	1.31084e-244
EIF2B1	514.665	0.825948	0.0246944	33.4467	2.87278e-245	1.70928e-244
WDR82	2621.07	0.530673	0.0158689	33.4412	3.46092e-245	2.05847e-244
CEPT1	763.773	0.816996	0.0244313	33.4405	3.5376e-245	2.10331e-244
BTBD1	1626.71	0.601974	0.0180043	33.435	4.25726e-245	2.53028e-244
GRHPR	364.116	1.15656	0.0346107	33.4163	7.9622e-245	4.72886e-244
IGF2BP3	644.208	-3.39323	0.101551	-33.414	8.57202e-245	5.08919e-244
DNAJB1	2263.02	-1.33091	0.0398525	-33.396	1.56837e-244	9.29793e-244
PSENEN	589.842	0.595736	0.0178466	33.3808	2.60156e-244	1.54119e-243
FMNL2	3116.59	-1.5668	0.046942	-33.3775	2.9118e-244	1.72374e-243
SERINC3	2996.66	0.465957	0.0139618	33.3738	3.28724e-244	1.94529e-243
CD48	1706.09	-2.2493	0.067398	-33.3734	3.33811e-244	1.97468e-243
ESYT2	2463.51	-1.30868	0.0392199	-33.3677	4.03266e-244	2.38468e-243
VPS36	952.097	0.614919	0.0184291	33.3667	4.1729e-244	2.46672e-243
RC3H1	867.605	-0.610357	0.0182954	-33.3613	4.99456e-244	2.9503e-243
ANAPC10	206.461	-1.10432	0.0331233	-33.3396	1.02972e-243	6.0804e-243
DERL1	2048.99	-0.517414	0.0155297	-33.3177	2.13938e-243	1.26101e-242
ARID5B	2124.74	-2.91665	0.087542	-33.3171	2.17999e-243	1.28448e-242
BLNK	942.355	1.37631	0.0413135	33.3138	2.44074e-243	1.43761e-242
HDAC2	1202.2	1.04773	0.0314541	33.3098	2.78101e-243	1.63744e-242
SYS1	453.78	0.884698	0.0265619	33.307	3.06068e-243	1.80146e-242
KIAA1430	460.117	1.05984	0.031826	33.3011	3.72741e-243	2.1931e-242
INO80E	165.07	1.21272	0.0364207	33.2974	4.20632e-243	2.47398e-242
SOLH	434.822	1.12855	0.0338979	33.2926	4.93545e-243	2.90179e-242
CTDNEP1	1577.47	0.613739	0.0184408	33.2815	7.14435e-243	4.1975e-242
CHD8	2248.07	-0.460613	0.0138425	-33.2752	8.81555e-243	5.17752e-242
MYO18A	3369.15	1.26344	0.0379758	33.2695	1.0675e-242	6.26734e-242
ANGPTL4	259.615	-3.04928	0.0916609	-33.267	1.16002e-242	6.80812e-242
RPL23AP82	56.0878	1.50061	0.0451083	33.2669	1.1625e-242	6.82023e-242
TUBGCP6	523.985	1.09524	0.0329452	33.2443	2.46627e-242	1.44538e-241
MRPL52	164.224	0.926349	0.0278854	33.2199	5.56183e-242	3.25605e-241
SIK2	512.336	0.70684	0.0212793	33.2173	6.0556e-242	3.54386e-241
MRPS7	545.623	0.984008	0.0296468	33.191	1.45184e-241	8.46926e-241
ZBTB4	1179.22	1.18933	0.0358398	33.1846	1.79436e-241	1.04636e-240
C17orf61-PLSCR3	108.838	0.965359	0.0290974	33.1768	2.32386e-241	1.35321e-240
H2AFY	3736.85	0.794787	0.0239583	33.1737	2.5776e-241	1.50042e-240
CD58	1674.56	-1.38501	0.041751	-33.173	2.64025e-241	1.53635e-240
WBP1L	932.646	0.717466	0.0216304	33.1693	2.9891e-241	1.73873e-240
ZNF438	935.576	-1.0956	0.0330482	-33.1517	5.35991e-241	3.11559e-240
CHID1	1141.98	1.41515	0.0427078	33.1357	9.10798e-241	5.29238e-240
ABCC1	6131.39	-1.20795	0.0364594	-33.1314	1.04872e-240	6.09164e-240
CCDC9	417.323	-1.10539	0.0333647	-33.1305	1.08131e-240	6.27871e-240
METTL13	515.302	0.932594	0.0281543	33.1244	1.32451e-240	7.68816e-240
RFXAP	153.352	2.0323	0.0613544	33.1239	1.34391e-240	7.79801e-240
CXorf38	1302.45	-0.896421	0.0270637	-33.1226	1.40587e-240	8.15175e-240
BNIP3	528.138	-1.86356	0.0562867	-33.1084	2.25063e-240	1.30454e-239
[truncated: 6,195 more rows]

## Sheet: IFNB1 vs Baseline
#gene	baseMean	log2FoldChange	lfcSE	stat	pvalue	padj
ABCD1	1930.97	-1.41574	0.036478	-38.8109	0	0
ABTB2	1376.24	-2.49521	0.0502172	-49.6883	0	0
ACOT9	2302.83	-1.11093	0.0207983	-53.4143	0	0
ACOX1	882.682	0.811314	0.019536	41.5292	0	0
ADAR	21348.2	-1.48519	0.0187803	-79.0824	0	0
ADPRHL2	1483.53	-1.46868	0.0164992	-89.0154	0	0
AFG3L2	1317.97	0.698306	0.0180097	38.7739	0	0
AGPAT3	4068.7	-0.708644	0.0171713	-41.2691	0	0
AGPHD1	856.47	-1.55925	0.0259947	-59.9834	0	0
AIDA	556.647	-1.68562	0.0219594	-76.7607	0	0
AIM2	577.587	-4.28819	0.0467787	-91.6697	0	0
AK056817	911.035	-2.18021	0.0464015	-46.9857	0	0
AK311380	671.504	-1.22842	0.0287221	-42.7691	0	0
AKAP7	269.329	-2.61747	0.0401621	-65.1726	0	0
AKIRIN2	1920.06	-1.00528	0.0261161	-38.4926	0	0
AMOTL2	579.645	-8.07846	0.115909	-69.6965	0	0
AMPD2	367.632	2.73497	0.0480324	56.94	0	0
ANKFY1	4813	-1.39494	0.0194789	-71.6125	0	0
ANKIB1	2165.18	-1.4792	0.0194045	-76.2301	0	0
APOBEC3A_B	21044.6	-6.48493	0.122347	-53.0045	0	0
APOBEC3C	1869.04	-1.23246	0.0283622	-43.4542	0	0
APOBEC3F	114.002	-2.80372	0.0424395	-66.064	0	0
APOBEC3G	3892.43	-4.18647	0.0674413	-62.0757	0	0
APOL1	5113.64	-2.92602	0.0335642	-87.177	0	0
APOL2	3786.91	-2.1379	0.0263231	-81.2175	0	0
APOL3	4528.76	-3.56104	0.0779504	-45.6834	0	0
APOL6	11557.7	-2.84443	0.023616	-120.445	0	0
APPL1	2580.05	-1.01324	0.0209774	-48.3017	0	0
ARHGAP15	709.909	-1.30922	0.0346849	-37.746	0	0
ARHGAP17	1913.72	-1.48723	0.0342515	-43.4209	0	0
ARHGAP27	3358.56	-1.80248	0.0258879	-69.6264	0	0
ARHGEF19	256.445	-5.19412	0.0604967	-85.858	0	0
ARL1	563.591	0.794783	0.0207402	38.3209	0	0
ARL2BP	580.035	0.847245	0.021426	39.5429	0	0
ARL6IP6	954.433	-1.01379	0.0179927	-56.3446	0	0
ARV1	215.188	2.18363	0.0330136	66.1434	0	0
ASCL2	163.635	-3.36187	0.0893936	-37.6076	0	0
ATF3	20002.1	-2.98148	0.0521225	-57.2014	0	0
ATF5	14249.3	-2.25468	0.0503107	-44.8151	0	0
ATG9A	697.987	1.44501	0.0288713	50.05	0	0
ATP10A	1699.61	-4.75774	0.0537473	-88.5207	0	0
ATP13A1	1979.15	-0.84915	0.0203483	-41.7308	0	0
ATP6V1H	3216.6	-1.22659	0.0262301	-46.7628	0	0
ATXN7L1	1559.01	-1.84138	0.0395516	-46.5563	0	0
AXL	713.283	-5.61597	0.0922767	-60.8601	0	0
AZI2	1405.05	-1.20208	0.0267504	-44.9369	0	0
B3GNT2	3003.5	-1.49223	0.0370574	-40.268	0	0
BAG1	2094.97	-1.43444	0.0208692	-68.7349	0	0
BAK1	1874.85	-1.52307	0.0394385	-38.6188	0	0
BATF2	2030.62	-3.83688	0.0365383	-105.01	0	0
BAZ1A	10059.7	-1.60335	0.0229605	-69.8308	0	0
BAZ2A	6672.75	-0.829324	0.0195328	-42.4581	0	0
BBX	2179.07	-1.71218	0.0266441	-64.2612	0	0
BCL2L13	1716.1	-1.07325	0.0260245	-41.24	0	0
BCL7A	223.294	2.06503	0.0531528	38.8508	0	0
BLZF1	4595.67	-2.68309	0.0346166	-77.5088	0	0
BMPR2	4692.08	-1.46275	0.0186295	-78.5178	0	0
BRIP1	2198.64	-4.44612	0.0518131	-85.8108	0	0
BST2	4892.29	-1.36098	0.0278284	-48.9062	0	0
BTF3L4	751.074	0.989925	0.0184853	53.5519	0	0
BTN3A3	956.081	-1.9495	0.0452978	-43.0373	0	0
C14orf37	306.187	0.98413	0.0240313	40.9519	0	0
C17orf67	171.278	-3.71509	0.0985255	-37.7069	0	0
C19orf66	2425.72	-2.58386	0.0195586	-132.109	0	0
C21orf91	2914.28	-1.90057	0.0452084	-42.0402	0	0
C3orf38	2177.22	-1.36192	0.0241038	-56.5025	0	0
C5orf22	937.51	-0.712067	0.0163392	-43.5802	0	0
C5orf56	219.423	-3.85953	0.0498833	-77.371	0	0
C6orf62	14440.3	-1.42346	0.0223781	-63.6093	0	0
C7orf25	5545.13	-1.61711	0.0218197	-74.1124	0	0
C9orf91	2131.86	-2.88701	0.0424897	-67.9461	0	0
CACNA1A	166.912	-5.41272	0.116023	-46.6523	0	0
CALCOCO2	2532.86	-1.24929	0.0199761	-62.5391	0	0
CARD16	170.017	-3.75436	0.0708902	-52.9602	0	0
CASP1	6146.2	-2.26583	0.0321457	-70.4862	0	0
CASP10	2164.79	-1.89203	0.0317028	-59.6801	0	0
CASP4	4904.03	-1.5617	0.034999	-44.6212	0	0
CASP7	2012.71	-1.50537	0.0332274	-45.305	0	0
CASP8	1041.06	-0.938606	0.0214289	-43.801	0	0
CBR1	3137.9	-2.51794	0.0390938	-64.4075	0	0
CCDC109B	1069.46	-2.30045	0.0421244	-54.6108	0	0
CCDC47	2210.76	0.901612	0.0183458	49.1455	0	0
CCL8	23739.3	-4.27507	0.0933447	-45.7987	0	0
CCNJ	822.491	-1.74442	0.0243379	-71.6749	0	0
CCNYL1	2469.13	-0.933323	0.0231454	-40.3243	0	0
CD2AP	1245.23	-1.87954	0.0393222	-47.7985	0	0
CD38	4629.25	-4.52979	0.0591154	-76.6261	0	0
CD47	5132.7	-1.22389	0.032575	-37.5715	0	0
CD7	386.128	-3.56595	0.0855518	-41.6818	0	0
CDC73	2321.29	-1.23394	0.0154902	-79.6591	0	0
CDK17	1096.69	-1.3083	0.0170675	-76.6543	0	0
CDKN1C	201.304	-5.36242	0.135202	-39.6623	0	0
CDR2	284.109	2.29535	0.0511183	44.9026	0	0
CENPN	597.748	-1.49799	0.0257625	-58.1462	0	0
CEP57L1	361.146	-1.49698	0.0300198	-49.8665	0	0
CHDH	178.841	3.61554	0.0747981	48.3374	0	0
CHRNB1	325.751	-1.86219	0.0223061	-83.4831	0	0
CHST12	593.167	-2.68581	0.0377362	-71.1733	0	0
CIDEC	1297.97	0.810362	0.0201977	40.1215	0	0
CISD2	1469.1	-1.01498	0.0242168	-41.9124	0	0
CKAP4	1323.53	-3.01847	0.0524651	-57.5329	0	0
CLEC2B	1159.03	-1.80125	0.045999	-39.1585	0	0
CLIC1	12167.9	-0.93128	0.0156941	-59.3394	0	0
CLIC4	11257.9	-0.990846	0.0257932	-38.415	0	0
CLPX	563.218	0.928666	0.0189589	48.9832	0	0
CMC2	583.346	-0.859298	0.0187071	-45.9344	0	0
CMPK2	12823.4	-4.9602	0.0499928	-99.2183	0	0
CNP	4782.45	-2.99514	0.021854	-137.052	0	0
COA4	247.676	1.02643	0.0271967	37.7411	0	0
CPSF7	1128.16	0.54927	0.0143479	38.2823	0	0
CREBRF	2317.69	-1.4814	0.0336205	-44.0625	0	0
CSRNP1	7386.79	-2.01905	0.043613	-46.2946	0	0
CSRP2	400.932	-3.66534	0.084707	-43.2707	0	0
CTNNBL1	2434.99	-1.27229	0.0168888	-75.3332	0	0
CTR9	974.114	0.941942	0.0209696	44.9194	0	0
CUL4B	1513.2	-0.914812	0.0194061	-47.1404	0	0
CXCL11	39262.8	-8.02996	0.116002	-69.2223	0	0
CXCL9	11296.5	-7.00407	0.145899	-48.0062	0	0
CXorf21	3575.87	-1.66667	0.0408915	-40.7583	0	0
CXorf38	1302.45	-1.08367	0.0274332	-39.5022	0	0
DCBLD1	479.93	-1.45669	0.0365836	-39.8182	0	0
DCK	2915.01	-1.33974	0.0274214	-48.8575	0	0
DCP1A	2549.26	-1.57248	0.0220589	-71.2856	0	0
DDX26B	717.467	-1.21783	0.0272491	-44.6924	0	0
DDX58	36139.8	-4.85094	0.0439818	-110.294	0	0
DDX60	8817.8	-3.91226	0.0318241	-122.934	0	0
DDX60L	17622.1	-4.25665	0.0390084	-109.121	0	0
DECR1	1873.58	-1.04342	0.0233081	-44.7665	0	0
DEK	7471.42	-0.78698	0.0186074	-42.294	0	0
DENND1B	8726.04	-1.67524	0.0318638	-52.575	0	0
DENND3	1162.97	-1.93503	0.0443832	-43.5983	0	0
DENND5A	8498.43	-2.1961	0.0349472	-62.8405	0	0
DERL1	2048.99	-0.802811	0.0157082	-51.1077	0	0
DHRSX	4569.71	-1.39594	0.0259036	-53.8896	0	0
DHX58	5714.87	-2.33209	0.0296761	-78.5847	0	0
DNAJA1	11771.4	-1.39538	0.0147912	-94.3383	0	0
DNAJC13	3509.08	-0.653808	0.0159857	-40.8996	0	0
DNAJC7	3739.16	-0.79236	0.0094355	-83.9764	0	0
DOCK8	10216.3	-1.77225	0.0267092	-66.3537	0	0
DPH1	399.603	0.676976	0.0171103	39.5655	0	0
DRAP1	1625.85	-0.940642	0.0209433	-44.9137	0	0
DROSHA	1197.29	-0.909158	0.0184944	-49.1586	0	0
DSP	362.908	-6.14659	0.128164	-47.9586	0	0
DTX3L	11631.9	-2.10753	0.0209344	-100.673	0	0
DUSP5	9086.45	-2.18945	0.0541878	-40.4049	0	0
DUSP7	138.914	1.95461	0.04666	41.8904	0	0
DYNC1LI2	2906.52	-0.909721	0.0203271	-44.7541	0	0
DYNLT1	3822.57	-2.7723	0.0244878	-113.211	0	0
EFR3A	5326.15	-1.00041	0.0188071	-53.1935	0	0
EHD4	9929.85	-1.1143	0.0250691	-44.4492	0	0
EIF2AK2	10204.9	-2.92523	0.0254287	-115.036	0	0
ELF4	3066.53	-1.01386	0.0157661	-64.3063	0	0
ELMO2	1962.2	-1.1702	0.0178954	-65.3914	0	0
ENDOD1	952.478	-2.44958	0.0510594	-47.9751	0	0
ENOX2	146.965	0.655116	0.0121126	54.0856	0	0
ENTPD5	641.398	-1.94738	0.0349365	-55.7406	0	0
EPB41L5	228.308	-2.87607	0.044406	-64.7676	0	0
EPHB2	1030.89	-3.82397	0.0494159	-77.3833	0	0
EPSTI1	11157.5	-3.58821	0.0380749	-94.241	0	0
EREG	2101.75	-4.03055	0.073467	-54.8621	0	0
ERP44	3809.67	-0.927179	0.0221696	-41.8221	0	0
ETNK1	2819.58	-0.672443	0.0173311	-38.7998	0	0
ETV7	1131.77	-5.45057	0.0446417	-122.096	0	0
EXOC3L1	124.168	-6.63788	0.102877	-64.5223	0	0
EXOC6	1144.58	-1.32463	0.0314124	-42.1689	0	0
EXTL3	1087.68	-1.18948	0.0225199	-52.8192	0	0
FAM111A	2088.11	-1.6091	0.0331699	-48.5109	0	0
FAM122C	214.105	-1.35413	0.026105	-51.8727	0	0
FAM126A	1139.02	1.51236	0.0384237	39.3602	0	0
FAM129A	17949.4	-1.52993	0.0324835	-47.0987	0	0
FAM135A	1347.44	-2.19852	0.0435989	-50.4261	0	0
FAM168B	1372.79	1.08288	0.0287945	37.6073	0	0
FAM177A1	2357.88	-2.15333	0.0351461	-61.2679	0	0
FAM189B	1482.34	-0.757115	0.0190315	-39.7823	0	0
FAM199X	830.205	0.837319	0.0175934	47.5928	0	0
FAM26F	3010.82	-3.60015	0.0918966	-39.1761	0	0
FAM46A	6887.68	-2.72039	0.0433302	-62.7827	0	0
FAM65B	2308.58	-2.93897	0.0696098	-42.2206	0	0
FAM72A	233.998	-1.85596	0.0409348	-45.3395	0	0
FAM72B	282.602	-1.73603	0.0343896	-50.4813	0	0
FAS	1047.89	-1.85555	0.0406186	-45.6823	0	0
FBXO42	664.472	0.754323	0.0177148	42.5816	0	0
FBXO6	1590.72	-1.37012	0.0261369	-52.4208	0	0
FBXO7	4761.35	-1.09033	0.0132285	-82.4227	0	0
FCGR1A	136.592	-4.11836	0.10962	-37.5694	0	0
FKBP4	715.649	1.98394	0.0515803	38.4631	0	0
FKBP6	6139.37	-3.05919	0.0774618	-39.4929	0	0
FMR1	1927.93	-1.48537	0.0227661	-65.2452	0	0
FPR2	213.558	-3.43408	0.0892823	-38.4632	0	0
FPR3	38976.8	-1.47413	0.0334792	-44.0311	0	0
FRMD3	1136.78	-6.20871	0.073422	-84.562	0	0
FRYL	2237.92	-0.703988	0.0186154	-37.8175	0	0
FTSJD2	3390.22	-2.00891	0.0174207	-115.318	0	0
FYTTD1	3895.38	-1.25066	0.0193414	-64.6626	0	0
GALNT3	477.172	-3.0485	0.0614258	-49.6289	0	0
GAPVD1	1053.79	0.523402	0.0134286	38.9765	0	0
GBP1	27390.9	-4.93172	0.0530401	-92.981	0	0
GBP1P1	927.501	-5.65002	0.0684549	-82.5364	0	0
GBP2	4902.76	-2.18657	0.039185	-55.8013	0	0
GBP4	14038	-5.98538	0.0550529	-108.72	0	0
GBP5	14615.2	-4.13643	0.0548706	-75.3851	0	0
GBP7	3730.95	-6.70049	0.0812709	-82.4463	0	0
GCH1	6970.63	-5.25299	0.0675318	-77.7855	0	0
GCNT1	5033.44	-2.11641	0.0558703	-37.8807	0	0
GGA1	636.754	1.05048	0.0261634	40.1507	0	0
GIGYF2	1102.56	0.743358	0.0178712	41.5954	0	0
GIMAP2	1372.46	-1.98625	0.0375414	-52.9083	0	0
GLRX	5620.83	-1.84862	0.0368203	-50.2064	0	0
GLYR1	1768.88	0.497753	0.0123648	40.2557	0	0
GMPR	1935.25	-5.94503	0.0520254	-114.272	0	0
GOLGA3	1039.87	0.854152	0.0226825	37.6568	0	0
GOLM1	2907.57	-1.36765	0.0347985	-39.3019	0	0
GPBP1	4622.87	-1.28984	0.0245993	-52.4341	0	0
GPD2	5187.8	-1.63187	0.0296453	-55.0465	0	0
GPR180	1285.62	-1.90872	0.0254632	-74.96	0	0
GPR35	342.677	3.07915	0.081461	37.7991	0	0
GRIN3A	986.583	-3.3855	0.069047	-49.0318	0	0
GSDMD	1358.02	-1.215	0.0293186	-41.4413	0	0
GTDC1	402.215	0.898951	0.0237759	37.8094	0	0
GTF2B	1979.84	-1.41886	0.0264098	-53.7246	0	0
GTPBP1	3573.47	-2.47312	0.0247287	-100.01	0	0
GTPBP2	1903.69	-1.3335	0.0184541	-72.2602	0	0
GVINP1	662.713	-2.21575	0.0548006	-40.4328	0	0
HAPLN3	1119.19	-2.31669	0.0578518	-40.0453	0	0
HEG1	3821.99	-2.97139	0.0613041	-48.4696	0	0
HELZ2	11544.6	-3.86102	0.0371667	-103.884	0	0
HERC5	26562	-5.5185	0.0609791	-90.4983	0	0
HERC6	4912.58	-4.38724	0.0424681	-103.307	0	0
HERPUD2	1573.27	-0.719777	0.0187175	-38.4547	0	0
HES4	691.957	-5.31607	0.100296	-53.0039	0	0
HESX1	1119	-6.05216	0.0468848	-129.086	0	0
HIRA	2354.44	-1.26091	0.0113875	-110.727	0	0
HIST2H2BE	429.2	-2.19296	0.0519998	-42.1724	0	0
HIVEP2	2056.93	-1.97037	0.0477497	-41.2645	0	0
HK2	5716.55	-2.52518	0.0489151	-51.6238	0	0
HLA-E	31093.9	-1.04599	0.0250613	-41.7374	0	0
HLA-F	1282.95	-1.57197	0.0397707	-39.5259	0	0
HSBP1	952.706	0.564716	0.01493	37.8241	0	0
HSH2D	7347.66	-1.13908	0.0205196	-55.5117	0	0
IDO1	13139.7	-4.52557	0.0995731	-45.4497	0	0
IFI16	15109.7	-1.4452	0.0268294	-53.8665	0	0
IFI27	4208.29	-4.02657	0.0833702	-48.2975	0	0
IFI35	6584.75	-2.48824	0.0231125	-107.658	0	0
IFI44	682.976	-2.97133	0.0491957	-60.3982	0	0
IFI44L	15135.3	-4.73885	0.0543218	-87.2367	0	0
IFI6	10898.7	-3.63126	0.046292	-78.4423	0	0
IFIH1	37663.6	-3.69788	0.0434723	-85.0628	0	0
IFIT1	33915.9	-5.70751	0.119938	-47.5872	0	0
IFIT2	14198.7	-5.74802	0.0519616	-110.62	0	0
IFIT3	20519.1	-6.30256	0.0765408	-82.3425	0	0
IFIT5	4234.76	-2.37531	0.0423293	-56.1151	0	0
IFITM1	7111.15	-5.8839	0.0620004	-94.901	0	0
IFITM3	10610.4	-3.06353	0.0531203	-57.6716	0	0
IL15	849.24	-2.60985	0.0432982	-60.2763	0	0
IL15RA	1817.55	-3.70805	0.0594509	-62.3717	0	0
IL1RN	36364.8	-2.86908	0.0645235	-44.4657	0	0
INIP	579.711	0.969747	0.0241296	40.1891	0	0
IPO13	392.356	1.18807	0.0298352	39.8212	0	0
IPO7	2758.58	0.925032	0.0216531	42.7205	0	0
IRF1	7442.14	-2.21363	0.0343348	-64.4719	0	0
IRF2	4548.24	-1.78912	0.0240969	-74.2469	0	0
IRF7	4222.55	-3.38403	0.0372533	-90.8385	0	0
ISG15	39546.3	-6.20363	0.0688049	-90.1626	0	0
ISG20	5962.57	-6.5247	0.0427573	-152.599	0	0
JAK2	5782.96	-1.42262	0.0260737	-54.5616	0	0
JUP	5397.94	-2.66384	0.0538569	-49.4614	0	0
KARS	5084.96	-1.19482	0.0160822	-74.2944	0	0
KAT2B	2900.9	-1.83037	0.0376735	-48.585	0	0
KCTD20	2122.33	0.773171	0.0170646	45.3084	0	0
KDM1B	2013.01	-1.12292	0.0260834	-43.0509	0	0
KIAA0040	5898.62	-2.03723	0.0233383	-87.2916	0	0
KIAA0226	3931.37	-1.66317	0.0212202	-78.3767	0	0
KIAA0232	873.958	0.98802	0.0237786	41.5508	0	0
KIAA1033	6319.33	-0.982974	0.0244246	-40.2452	0	0
KIAA1109	3270.09	-1.23731	0.024645	-50.2051	0	0
KLF13	5303.52	-0.952517	0.0234213	-40.6689	0	0
KLHL12	816.393	0.703798	0.0161524	43.5723	0	0
KPNB1	10344.9	-0.973488	0.0151699	-64.1722	0	0
LAG3	1854.14	-6.46566	0.0652714	-99.0581	0	0
LAP3	19318.5	-2.65642	0.030852	-86.1019	0	0
LGALS3BP	6325.45	-2.28114	0.0432491	-52.7442	0	0
LGALS9	10913.6	-2.07072	0.0204387	-101.314	0	0
LIPA	367910	-1.98292	0.0436664	-45.4107	0	0
LMBR1	1017.36	-1.10557	0.0248361	-44.5147	0	0
LMO2	2289.17	-1.55758	0.0322878	-48.2405	0	0
LOC100505676	463.462	2.61796	0.0671014	39.0149	0	0
LRRC41	838.077	0.644948	0.0157001	41.0793	0	0
LRSAM1	636.04	-0.825729	0.0207239	-39.8443	0	0
LY6E	7517.82	-2.99463	0.0403025	-74.304	0	0
LYN	14167.4	-1.49968	0.0297104	-50.4767	0	0
LYPLA2	681.679	0.715945	0.0182275	39.2783	0	0
MAML2	3243.3	-2.02322	0.0252656	-80.0778	0	0
MAP2K1	1734	0.884288	0.0232794	37.9859	0	0
MASTL	2219.59	-2.86164	0.0304394	-94.0111	0	0
MAX	2061.94	-1.22527	0.0284113	-43.1262	0	0
MB21D1	2174.13	-1.98686	0.0279651	-71.0479	0	0
MCL1	15355.7	-1.14577	0.0204004	-56.1641	0	0
MCOLN2	3139.57	-2.82386	0.0500342	-56.4386	0	0
MED25	2232.2	-1.05229	0.0191892	-54.8375	0	0
MED26	1205.17	0.744674	0.0137997	53.9632	0	0
MEF2A	3056.49	-1.43593	0.0260347	-55.1546	0	0
MFN1	1496.3	-1.66901	0.0337984	-49.3813	0	0
MIA3	4598.61	-0.969695	0.0213313	-45.4588	0	0
MICB	1318.4	-1.43721	0.0272838	-52.6761	0	0
MIER1	1709.34	-0.702917	0.0160239	-43.8669	0	0
MIR548N	1893.8	-1.3625	0.0177058	-76.9518	0	0
MNDA	7189.52	-2.40359	0.0462433	-51.9769	0	0
MOB1A	11636.3	-0.579129	0.0153283	-37.7816	0	0
MOV10	4343.7	-2.53447	0.0237397	-106.761	0	0
MRPL17	604.976	-1.07797	0.0196366	-54.8962	0	0
MRPL32	1009.18	-1.37133	0.0255042	-53.7689	0	0
MRPL40	1056.19	-1.68351	0.0328251	-51.2872	0	0
MT1A	1980.43	-6.14989	0.060782	-101.179	0	0
MTFR1L	398.565	0.820457	0.0144272	56.8688	0	0
MX1	65056.1	-5.44199	0.0578229	-94.1147	0	0
MX2	22260.3	-4.71581	0.0493866	-95.4877	0	0
MYADM	1142.28	-1.76031	0.0374382	-47.0191	0	0
MYCBP2	6169.04	-1.55437	0.0224783	-69.1499	0	0
MYD88	6022.44	-2.75525	0.0240456	-114.584	0	0
MYL12A	17011.1	-1.02727	0.0188143	-54.6006	0	0
MYOF	13027.5	-2.77863	0.0614264	-45.2352	0	0
NAGK	5486.24	-1.46965	0.0319195	-46.0424	0	0
NAMPT	23597.7	-2.13574	0.0454823	-46.9577	0	0
NAPA	4228.84	-1.18534	0.0167282	-70.8586	0	0
NCBP2	930.284	0.714902	0.0172068	41.5476	0	0
NCF1	11238.1	-4.41842	0.079776	-55.3853	0	0
NCF1C	4312.75	-3.99708	0.0808186	-49.4575	0	0
NCOA1	3696.12	-1.72717	0.0251644	-68.6356	0	0
NCOA2	1990.46	-1.41631	0.035082	-40.3715	0	0
NCOA7	5621.21	-2.40654	0.0444479	-54.1429	0	0
NDUFA9	1790.75	-1.14926	0.0248295	-46.2861	0	0
NDUFC1	555.763	-0.91853	0.0234755	-39.1271	0	0
NEXN	1028.2	-6.54595	0.0774498	-84.5187	0	0
NFIX	472.208	-2.91444	0.0549813	-53.0078	0	0
NLRC5	3266.07	-2.61709	0.0281091	-93.1045	0	0
NMI	4371.88	-2.10647	0.0303893	-69.3164	0	0
NT5C3A	9467.99	-4.94404	0.0309089	-159.955	0	0
NUB1	12188.3	-2.07465	0.034539	-60.0668	0	0
NUP160	1816.04	-0.7128	0.0154291	-46.1983	0	0
NUP205	2157.38	-0.88407	0.019223	-45.9902	0	0
NXF1	3572.49	-1.85261	0.0405507	-45.6863	0	0
OAS1	12821.2	-4.47918	0.0557682	-80.3177	0	0
OAS2	10633.2	-4.68086	0.0660836	-70.8324	0	0
OAS3	59636.4	-4.27736	0.0482936	-88.5699	0	0
OASL	29101.2	-5.5232	0.0613401	-90.0421	0	0
OCRL	454.141	0.792381	0.0186901	42.3957	0	0
OGFR	2875.79	-1.59715	0.0248666	-64.2286	0	0
OPN3	563.455	1.59605	0.0424809	37.571	0	0
OPTN	6713.14	-2.3075	0.0377178	-61.178	0	0
OSBPL5	778.474	-1.87744	0.0360206	-52.1214	0	0
PAFAH2	211.411	0.911997	0.021525	42.3692	0	0
PALM2-AKAP2	7080.46	-2.5757	0.0545253	-47.2386	0	0
PANX1	3150.23	-0.960426	0.025472	-37.7051	0	0
PAPD4	9001.52	-1.53578	0.0326257	-47.0726	0	0
PAPD5	1059.77	-0.905295	0.0223865	-40.4394	0	0
PAPD7	2482.09	-2.4798	0.0309666	-80.0801	0	0
PAPOLA	3626.13	0.455869	0.0117465	38.8089	0	0
PAQR8	1374.45	-2.01901	0.0456223	-44.2549	0	0
PARP10	5082.57	-3.02113	0.0257417	-117.363	0	0
PARP11	885.69	-1.65168	0.0202104	-81.7243	0	0
PARP12	5788.11	-1.57176	0.0162824	-96.5313	0	0
PARP14	32104.9	-3.20943	0.0323096	-99.3336	0	0
PARP9	10298.3	-2.4708	0.0199682	-123.736	0	0
PAX5	1043.18	-5.44013	0.10033	-54.2222	0	0
PCGF5	5266.33	-1.5732	0.024828	-63.3641	0	0
PDGFRL	922.463	-7.57597	0.0916108	-82.6974	0	0
PDHX	438.498	0.794279	0.0185657	42.7821	0	0
PDXDC1	1115.56	0.94962	0.0219437	43.2752	0	0
PGP	268.092	1.24377	0.0328359	37.8784	0	0
PHACTR2	2883.85	-1.04628	0.0244541	-42.7855	0	0
PHACTR4	2748.62	-1.91107	0.0410788	-46.522	0	0
PHF11	1915.9	-1.85376	0.0213851	-86.6844	0	0
PHF15	2413.97	-2.18229	0.0254612	-85.7101	0	0
PHKG2	282.362	1.05356	0.0249565	42.216	0	0
PI4K2B	4565.72	-3.23778	0.0228931	-141.43	0	0
PIWIL4	2672.29	-1.86811	0.0403232	-46.3284	0	0
PKN2	1205.5	-1.13476	0.0247949	-45.7657	0	0
PLEKHO1	5632.24	-1.43481	0.0305704	-46.9346	0	0
PML	5652.82	-2.81924	0.0220185	-128.039	0	0
PNPT1	3865.2	-3.26452	0.0228385	-142.94	0	0
PPA1	2748.35	-1.58654	0.0407506	-38.9328	0	0
PPM1K	4368.27	-2.86364	0.0286594	-99.9198	0	0
PPP2R2A	2255.38	-1.55082	0.0226016	-68.6157	0	0
PPP2R4	3302.59	-0.85129	0.0215748	-39.4576	0	0
PREPL	356.098	1.81444	0.0418433	43.3628	0	0
PRKACA	1101.57	1.0698	0.0253958	42.125	0	0
PRKAG2	1439.5	-1.26229	0.0261608	-48.2512	0	0
PRKAR2A	738.906	0.82914	0.0214065	38.733	0	0
PRKRIR	938.982	0.798359	0.0185054	43.1419	0	0
PRPSAP2	222.968	1.05452	0.0255159	41.3278	0	0
PSMA3	2244.32	-0.995149	0.0157866	-63.0377	0	0
PSMA4	3617.17	-1.80289	0.0189214	-95.2832	0	0
PSMA5	2551.82	-0.835336	0.0152923	-54.6247	0	0
PSMB10	2006.9	-1.50648	0.0221028	-68.158	0	0
PSMB9	2748.71	-2.25978	0.0309686	-72.9699	0	0
PSME1	4358.91	-1.02497	0.024753	-41.4077	0	0
PSME2	5724.56	-1.63137	0.0249177	-65.4704	0	0
PTPRA	2759.82	-0.869879	0.0150446	-57.82	0	0
PVRL3	236.515	-3.91364	0.0785831	-49.8026	0	0
QSER1	2290.1	-1.28552	0.0222784	-57.7026	0	0
RAB8B	6486.55	-1.0468	0.0248321	-42.1551	0	0
RABAC1	771.289	-1.8979	0.0352698	-53.8108	0	0
RABGAP1L	2560.37	-2.35729	0.0227234	-103.738	0	0
RABGGTA	736.683	-0.949603	0.0222717	-42.6372	0	0
RAD23B	2735.2	0.820558	0.0171491	47.8486	0	0
RAD9A	358.97	-1.96109	0.0258932	-75.7376	0	0
RALB	4051.7	-1.25185	0.0215648	-58.0508	0	0
RALBP1	1141.76	0.578337	0.0133492	43.3237	0	0
RARRES3	387.923	-3.57547	0.0596299	-59.961	0	0
RASSF3	1926.49	-0.796338	0.0201927	-39.4369	0	0
RBCK1	2572.58	-1.61359	0.0210701	-76.5819	0	0
RBM43	987.187	-2.5205	0.0308057	-81.8195	0	0
RERE	3115.87	-1.13731	0.0283029	-40.1834	0	0
RET	368.63	-5.74562	0.0767553	-74.8564	0	0
RHBDF2	1305.58	-2.12841	0.0476837	-44.636	0	0
RICTOR	1855.53	-1.2968	0.0238853	-54.2928	0	0
RIPK1	2973.52	-1.22623	0.0238723	-51.3662	0	0
RIPK3	638.498	-0.936902	0.0235072	-39.856	0	0
RMI2	871.807	-2.39279	0.0368775	-64.8849	0	0
RNF114	4959.7	-1.30562	0.0186412	-70.0397	0	0
RNF138	1604.96	-1.23502	0.0238028	-51.8853	0	0
RNF149	3484.67	-1.39651	0.0321322	-43.4614	0	0
RNF213	87733.4	-3.14361	0.0295557	-106.362	0	0
RNF31	4051.59	-1.00038	0.0142879	-70.0161	0	0
RNF40	1369.7	0.505938	0.0124745	40.5577	0	0
RNMT	986.313	0.724834	0.019129	37.8919	0	0
RPP14	364.442	0.880592	0.0186126	47.3117	0	0
RSAD2	55016.4	-5.86618	0.11561	-50.741	0	0
RTCB	5860.12	-1.98947	0.0264565	-75.1978	0	0
RTP4	1289.29	-3.46302	0.0276449	-125.268	0	0
RUSC1	538.541	-0.8591	0.0213847	-40.1735	0	0
SAMD9	30115.6	-3.67306	0.0373945	-98.2247	0	0
SAMD9L	13133.5	-2.32744	0.0353968	-65.753	0	0
SAMHD1	13790.3	-1.1743	0.0230213	-51.0095	0	0
SAP18	2986.98	-1.02933	0.0193522	-53.1894	0	0
SAT1	18074.7	-1.49674	0.0353205	-42.3758	0	0
SAT2	957.189	-0.906839	0.0210757	-43.0276	0	0
SCAF11	3864.92	-0.640329	0.0154199	-41.5262	0	0
SCARB2	9823.01	-1.97206	0.0483004	-40.829	0	0
SCIN	330.656	-5.91501	0.110236	-53.6577	0	0
SCLT1	575.209	-1.61473	0.0191627	-84.2643	0	0
SECTM1	6179.08	-3.37631	0.0505873	-66.7424	0	0
SELO	1356.08	-1.67805	0.0424297	-39.5489	0	0
SEMA4D	3147.27	-2.16142	0.0245806	-87.9319	0	0
SERP1	2878.49	0.708013	0.0173199	40.8787	0	0
SERPING1	2938.96	-4.8749	0.0551031	-88.4687	0	0
SETX	6656.86	-1.04173	0.0168211	-61.93	0	0
SFXN5	252.494	1.64363	0.0346321	47.4598	0	0
SH3GLB1	4182.23	-0.663248	0.0152719	-43.4293	0	0
SIDT2	7738.76	-1.80444	0.0389538	-46.3224	0	0
SIK2	512.336	0.825826	0.0215456	38.3292	0	0
SLC15A4	1345.08	-1.46775	0.0355115	-41.3319	0	0
SLC25A28	1620.55	-2.30357	0.0265753	-86.6809	0	0
SLC31A2	2250.71	-2.6682	0.0335157	-79.6102	0	0
SLC38A5	1025.67	-4.79995	0.0673041	-71.3173	0	0
SLC4A7	579.736	2.20654	0.0414203	53.272	0	0
SLC8A1	1702.81	-2.28289	0.054691	-41.7415	0	0
SLFN12	1639.35	-1.69667	0.0271974	-62.3837	0	0
SLFN5	9296.74	-2.89253	0.0749245	-38.606	0	0
SMARCA5	6836.88	-1.12337	0.0156235	-71.9026	0	0
SMCHD1	5223.92	-2.32111	0.0337895	-68.6931	0	0
SMU1	1857.93	-0.662904	0.0129646	-51.1319	0	0
SNIP1	588.388	-0.825949	0.0177843	-46.4427	0	0
SOS1	3489.4	-1.1527	0.0295159	-39.0535	0	0
SP100	5217.29	-1.82063	0.0174567	-104.294	0	0
SP110	4920.64	-3.44076	0.0239591	-143.61	0	0
SP140	2788.52	-4.08301	0.0358942	-113.751	0	0
SPATA13	1890.28	-1.83071	0.0362058	-50.564	0	0
SPATS2L	2567.72	-1.41121	0.0200981	-70.2162	0	0
SPPL2A	4652.21	-1.06485	0.0238266	-44.6915	0	0
SPSB1	799.719	-1.93609	0.0344999	-56.1186	0	0
SPTLC2	2706.41	-1.68808	0.0356803	-47.3112	0	0
SQRDL	8799.5	-1.13003	0.0190874	-59.2031	0	0
SRGAP2	7274.58	-1.89203	0.0203875	-92.8035	0	0
SRGAP2B	1455.78	-1.90911	0.0260564	-73.2683	0	0
SRGAP2D	2446.04	-1.63542	0.0273144	-59.8739	0	0
SRP54	2109.98	-0.787484	0.0169529	-46.4513	0	0
SRSF4	2305.63	-0.823117	0.0186529	-44.1282	0	0
SRSF6	1331.53	1.41119	0.0333104	42.365	0	0
SSB	7910.31	-2.10957	0.0224598	-93.9266	0	0
ST3GAL5	2891.97	-1.66317	0.0359492	-46.2645	0	0
STAP1	1484.04	-5.47075	0.0742521	-73.6782	0	0
STARD5	510.667	-2.02095	0.0436215	-46.3292	0	0
STAT1	51153.1	-2.91008	0.0337731	-86.1657	0	0
STAT2	12647.9	-2.85926	0.0223732	-127.798	0	0
STAT3	6728.91	-0.799661	0.0138751	-57.633	0	0
STAU1	2490.26	-0.527965	0.0119877	-44.0424	0	0
STK3	868.385	-1.36324	0.0295969	-46.0602	0	0
STK40	3464.95	-0.958467	0.0203673	-47.0592	0	0
STOM	9307.09	-1.97418	0.0293181	-67.3366	0	0
STX11	6352.22	-1.75291	0.0404965	-43.2854	0	0
STX17	1471.38	-1.44419	0.017775	-81.2482	0	0
SYS1	453.78	1.23325	0.0269855	45.7006	0	0
SYTL3	601.867	-2.06856	0.0397578	-52.0291	0	0
SYVN1	757.466	0.800586	0.0183367	43.6603	0	0
TAF12	249.976	0.830363	0.0201924	41.1226	0	0
TANGO2	526.939	0.953452	0.023787	40.0829	0	0
TAP1	17788.4	-2.42796	0.0225432	-107.703	0	0
TAP2	7125.91	-1.8418	0.0296427	-62.1334	0	0
TBC1D1	2094.65	-0.844561	0.0204705	-41.2575	0	0
TBC1D20	645.198	0.51882	0.0138073	37.5757	0	0
TBK1	1838.16	-0.754318	0.0170469	-44.2496	0	0
TBL1XR1	1202.31	1.23382	0.0304362	40.5378	0	0
TDRD7	5688.93	-2.28854	0.0241019	-94.9525	0	0
TGM1	161.81	-5.40032	0.069956	-77.196	0	0
THAP3	241.114	-1.5353	0.032017	-47.9528	0	0
THEMIS2	4685.77	-1.98125	0.0400641	-49.452	0	0
TIA1	2615.61	-1.09078	0.0203281	-53.6586	0	0
TINF2	1734.05	-1.61102	0.0244112	-65.995	0	0
TLK2	1459.92	-1.29135	0.0147894	-87.3159	0	0
TLR3	1098.97	-4.50917	0.0557812	-80.8368	0	0
TM9SF3	1154.34	1.81891	0.0423095	42.9907	0	0
TMCC1	364.258	0.767358	0.018182	42.2043	0	0
TMCC3	1553.11	-2.41451	0.0576245	-41.9008	0	0
TMEM110-MUSTN1	3641.44	-2.59589	0.0303024	-85.6661	0	0
TMEM140	1889.76	-2.437	0.0514139	-47.3997	0	0
TMEM171	189.799	-6.95685	0.178572	-38.9582	0	0
TMEM184C	752.888	0.536576	0.0131703	40.7415	0	0
TMEM19	1772.04	-1.3652	0.0298747	-45.6973	0	0
TMEM219	2308.04	-0.93288	0.0197584	-47.2144	0	0
TMEM229B	1529.21	-3.17514	0.063249	-50.2006	0	0
TMEM248	1665.82	0.314218	0.00808291	38.8744	0	0
TMEM255A	727.925	-2.26735	0.0494342	-45.8661	0	0
TMEM50A	5647.87	-1.04421	0.0268421	-38.9019	0	0
TMX1	3232.57	-0.774638	0.0200295	-38.6749	0	0
TNFSF10	22849.9	-5.76335	0.104303	-55.2559	0	0
TNFSF13B	10223.5	-2.94865	0.0316533	-93.1547	0	0
TNK2	1361.27	-1.45687	0.0259489	-56.1437	0	0
TOR1B	3746.67	-2.60673	0.0257075	-101.4	0	0
TRAF7	1100.04	0.835485	0.0205337	40.6884	0	0
TRAFD1	8477.92	-2.18316	0.0247933	-88.0545	0	0
TRANK1	6318.27	-3.52283	0.0378596	-93.0499	0	0
TRAPPC3	696.636	0.41807	0.00549815	76.0382	0	0
TRIM14	2570.22	-2.82903	0.0457631	-61.819	0	0
TRIM21	2755.15	-2.24045	0.02014	-111.243	0	0
TRIM22	10201.7	-2.94979	0.0295712	-99.7521	0	0
TRIM25	9224.02	-2.516	0.0249959	-100.657	0	0
TRIM26	3988.89	-1.00977	0.0249873	-40.4114	0	0
TRIM31	283.298	-5.44059	0.0953918	-57.0342	0	0
TRIM5	2580.34	-2.16047	0.0280259	-77.0885	0	0
TRIM56	2696.17	-1.49279	0.0188327	-79.2659	0	0
TRIM6-TRIM34	1149.6	-1.82434	0.0280507	-65.0374	0	0
TRIM69	2428.91	-1.53299	0.0277263	-55.29	0	0
TRIP12	8897.34	-0.574244	0.0144748	-39.672	0	0
TRIP4	1719.87	-1.3467	0.0208526	-64.5816	0	0
TRMT2A	427.166	1.10121	0.0245407	44.8729	0	0
TRPC4AP	4529.03	-1.15878	0.0137894	-84.0342	0	0
TTC13	385.54	1.87793	0.0414191	45.3398	0	0
TUFT1	405.513	-1.77181	0.0445288	-39.7903	0	0
UBA7	3856.23	-2.17114	0.0295771	-73.4061	0	0
UBAC1	621.418	1.17682	0.0311287	37.8048	0	0
UBAP2L	4597.77	1.00287	0.0222253	45.123	0	0
UBE2L6	9563.92	-3.08208	0.0210199	-146.627	0	0
UBE2M	398.166	0.919769	0.0225108	40.859	0	0
UBE2S	1222.37	-1.75609	0.0345328	-50.8528	0	0
UBE4A	1296.01	0.651883	0.0139092	46.8672	0	0
UBP1	3047.69	-0.873348	0.0182644	-47.817	0	0
UNC93B1	5994.32	-1.93603	0.0263506	-73.472	0	0
USB1	879.325	0.758441	0.0199509	38.0153	0	0
USP15	4701.75	-1.17668	0.0154523	-76.1492	0	0
USP18	8767.39	-5.54294	0.0514121	-107.814	0	0
USP25	3173.78	-1.87555	0.0194882	-96.2402	0	0
USP28	792.007	-1.12738	0.0254202	-44.3497	0	0
USP33	2442.3	-0.954817	0.0153748	-62.1025	0	0
USP41	90.2415	-4.16873	0.110172	-37.8385	0	0
USPL1	884.3	-1.04376	0.0262533	-39.7573	0	0
UTRN	4587.8	-1.55906	0.0274369	-56.8234	0	0
VAMP5	1917.54	-1.18591	0.0263323	-45.0364	0	0
VPS33A	980.158	0.530457	0.0126828	41.8249	0	0
VPS35	1899.15	1.01722	0.0176738	57.5553	0	0
VRK2	1894.9	-1.11471	0.0193674	-57.5558	0	0
WARS	31673.6	-2.89429	0.0463362	-62.4628	0	0
WASF2	5930.42	-0.578272	0.0142277	-40.6441	0	0
WDFY1	3080.82	-1.33463	0.0226777	-58.8519	0	0
WDR26	2369.24	0.651324	0.0150496	43.2785	0	0
WDR44	894.82	-0.754673	0.0175269	-43.058	0	0
WDR53	109.341	0.537779	0.0134413	40.0094	0	0
XAF1	8060.79	-2.53691	0.0364139	-69.6686	0	0
XIAP	1963.12	-0.824351	0.0161558	-51.025	0	0
XLOC_000182	230.509	-2.5836	0.0643877	-40.1256	0	0
XLOC_000436	90.9967	-2.44506	0.0529929	-46.1395	0	0
XLOC_003449	879.652	2.20188	0.0461811	47.6791	0	0
XLOC_005404	426.712	-6.91746	0.146679	-47.1606	0	0
XLOC_006582	303.521	-3.71269	0.0810229	-45.8227	0	0
XLOC_008886	343.334	-4.75263	0.0860351	-55.2406	0	0
XLOC_008908	472.394	-7.05376	0.0897941	-78.5549	0	0
XLOC_009588	228.05	-2.95947	0.0638969	-46.3164	0	0
XRN1	8785.8	-3.0478	0.0205713	-148.157	0	0
YEATS2	2589.01	-0.979983	0.0235153	-41.6742	0	0
YME1L1	6355.81	-0.762029	0.0188817	-40.3581	0	0
YTHDF1	719.313	0.64346	0.0171396	37.5423	0	0
ZBP1	1363.32	-6.48498	0.0545777	-118.821	0	0
ZBTB48	225.906	1.06896	0.0268668	39.7873	0	0
ZC3H8	83.9289	2.49423	0.0650209	38.3604	0	0
ZCCHC2	2701.62	-1.29987	0.0332265	-39.1216	0	0
ZKSCAN1	1300.63	0.860985	0.01863	46.2151	0	0
ZNF107	653.001	-1.9555	0.0354372	-55.1823	0	0
ZNF181	108.61	0.689236	0.0129287	53.3105	0	0
ZNF618	1676.12	-2.88913	0.0437321	-66.0641	0	0
ZNF738	62.2525	0.707386	0.0181493	38.9759	0	0
ZNFX1	22306.7	-2.77464	0.0251714	-110.23	0	0
ZNRF2	3138.11	-1.60152	0.0390783	-40.9822	0	0
MINK1	1750.7	1.33858	0.0356941	37.5013	8.76723e-308	2.00436e-306
LAMTOR5	634.532	0.667619	0.0178234	37.4574	4.55898e-307	1.04082e-305
RPL7L1	1245.5	0.843955	0.0225504	37.4253	1.51783e-306	3.4604e-305
RAB3GAP1	2657.86	-0.765994	0.0204735	-37.4139	2.32299e-306	5.28867e-305
POLA2	800.154	-1.07551	0.0287475	-37.4124	2.45354e-306	5.57813e-305
ZNF277	1266.15	-1.19338	0.0319135	-37.3941	4.87043e-306	1.10576e-304
SLC35A4	1887.08	-0.585939	0.0156854	-37.3556	2.05933e-305	4.66252e-304
TOMM20	1562.67	0.59049	0.0158218	37.3213	7.40178e-305	1.67352e-303
IKBKE	1600.29	-1.95168	0.0523149	-37.3064	1.29333e-304	2.92014e-303
FXYD6-FXYD2	826.293	-2.69734	0.0723632	-37.2751	4.16141e-304	9.38292e-303
LINC00623	101.224	-1.80035	0.048379	-37.2134	4.14121e-303	9.32455e-302
PTK2B	3707.7	-2.01722	0.0542114	-37.2102	4.6605e-303	1.04794e-301
DHX32	342.741	1.02524	0.0275723	37.1836	1.25748e-302	2.82363e-301
CNDP2	7382.31	-0.982191	0.026449	-37.1353	7.56368e-302	1.69609e-300
ITPRIPL2	3953.51	-1.24043	0.0334043	-37.1339	7.97513e-302	1.78591e-300
MKKS	664.036	1.10827	0.0298482	37.1304	9.08682e-302	2.03208e-300
YKT6	1082.71	0.480884	0.0129516	37.1294	9.43533e-302	2.10714e-300
TXNDC16	782.74	-1.5707	0.0423157	-37.1187	1.40208e-301	3.12692e-300
LYRM2	549.272	0.673473	0.0181615	37.0824	5.3916e-301	1.2008e-299
SLC17A9	212.336	2.24545	0.0605556	37.0807	5.74661e-301	1.27813e-299
ZNF146	971.41	0.842189	0.022716	37.0747	7.19435e-301	1.59797e-299
MPHOSPH6	288.08	1.36111	0.0367315	37.0556	1.46082e-300	3.24028e-299
VEZF1	2707.79	-0.930281	0.0251112	-37.0464	2.05032e-300	4.54174e-299
APPL2	511.005	1.98477	0.0536863	36.9698	3.50435e-299	7.75214e-298
MLKL	979.426	-2.15108	0.05821	-36.9539	6.30833e-299	1.39361e-297
CAMK2D	1418.72	-1.62925	0.0441493	-36.9032	4.10985e-298	9.06711e-297
RASSF1	419.633	0.983974	0.0267006	36.8522	2.70084e-297	5.95057e-296
MTOR	1018.65	0.728162	0.0197837	36.8061	1.47206e-296	3.23893e-295
MFN2	1590.12	0.82634	0.0224665	36.781	3.71318e-296	8.14812e-295
LATS1	1233.84	-0.551527	0.0150139	-36.7344	2.06295e-295	4.5148e-294
ZDHHC17	790.593	-0.714118	0.0194419	-36.7309	2.35084e-295	5.138e-294
IFITM2	1749.32	-2.54898	0.0693967	-36.7306	2.37342e-295	5.18044e-294
MTMR1	947.935	-1.05621	0.0287608	-36.724	3.02886e-295	6.60226e-294
RRAGC	2876.93	-0.625687	0.0170571	-36.682	1.41385e-294	3.0778e-293
OAZ2	1498.18	0.947502	0.0258575	36.6432	5.88039e-294	1.2784e-292
TYMP	11914	-1.68145	0.0459797	-36.5694	8.77032e-293	1.89661e-291
YIPF4	633.859	0.649286	0.0177684	36.5416	2.42103e-292	5.22178e-291
EIF3G	1654.38	1.04178	0.0285523	36.4866	1.8063e-291	3.88569e-290
STAG3	323.515	-1.79153	0.0491491	-36.4509	6.65411e-291	1.42581e-289
RSAD1	154.403	1.62925	0.0446999	36.4486	7.2325e-291	1.54772e-289
SNX29	1528.16	1.46148	0.0401067	36.4399	9.96041e-291	2.1287e-289
CBWD2	805.991	-1.39964	0.0384477	-36.4037	3.72162e-290	7.93301e-289
ICK	768.552	-1.4046	0.0385888	-36.3992	4.38231e-290	9.32919e-289
HS2ST1	761.177	1.5935	0.0437824	36.396	4.92772e-290	1.04767e-288
IVNS1ABP	3621.76	1.30513	0.0359106	36.344	3.26863e-289	6.93135e-288
PDZD2	176.794	-2.95572	0.0813526	-36.3322	5.02222e-289	1.06225e-287
HIP1	686.847	2.21323	0.0609778	36.2957	1.89369e-288	3.9899e-287
PNPO	460.295	1.06184	0.0292917	36.2505	9.74557e-288	2.03762e-286
SMCR7L	773.812	0.815476	0.0224957	36.2504	9.80608e-288	2.04766e-286
IL1R1	2748.85	1.97472	0.0545514	36.1992	6.26666e-287	1.30691e-285
RPP25L	75.4712	1.20669	0.0333402	36.1932	7.80237e-287	1.62511e-285
GTF3C2	795.03	0.779912	0.0215541	36.1839	1.0924e-286	2.26954e-285
SAP130	695.769	-0.670026	0.018519	-36.1804	1.23589e-286	2.56114e-285
MTFMT	134.454	1.68168	0.0465604	36.1183	1.17003e-285	2.41247e-284
UBQLN4	558.628	1.09291	0.0303069	36.0614	9.14383e-285	1.88299e-283
MTRF1	88.6077	0.554274	0.0153786	36.0418	1.85153e-284	3.8033e-283
PPP3CC	1447.21	-0.895462	0.0248514	-36.0327	2.57241e-284	5.27746e-283
SAMD1	282.78	1.23063	0.0341595	36.0259	3.29274e-284	6.74683e-283
ADAM17	2998.25	-1.0497	0.0291428	-36.0192	4.1819e-284	8.55802e-283
TICAM1	1068.74	-1.02456	0.0284527	-36.0094	5.95572e-284	1.21728e-282
OXA1L	1215.75	0.914076	0.0254001	35.987	1.33427e-283	2.72031e-282
MORC3	2547.63	-0.681799	0.0189799	-35.9221	1.37845e-282	2.80343e-281
TIPARP	4018.27	-1.51528	0.042183	-35.9215	1.4128e-282	2.86971e-281
MIOS	454.14	1.14486	0.0319406	35.8435	2.31925e-281	4.7051e-280
CASP3	2610.84	-1.04539	0.0291957	-35.8063	8.82782e-281	1.78649e-279
PCMTD1	1521.6	-0.894917	0.0249988	-35.7984	1.17113e-280	2.3671e-279
DEFB1	116.898	-7.77074	0.217501	-35.7274	1.48396e-279	2.98833e-278
GRK5	156.563	-2.57092	0.0719968	-35.7088	2.88199e-279	5.79651e-278
APC	1974.38	-0.745771	0.0208892	-35.7012	3.78829e-279	7.61e-278
UBAP1	909.645	0.669828	0.0187723	35.6817	7.58765e-279	1.52236e-277
IGF2BP3	644.208	-3.6752	0.103024	-35.6733	1.02465e-278	2.0533e-277
DDX42	2279.48	0.687643	0.019287	35.6532	2.0997e-278	4.20247e-277
SAMD4A	1215.01	-2.14222	0.0601465	-35.6167	7.72363e-278	1.54397e-276
EPS15L1	319.523	0.750124	0.0210889	35.5697	4.12863e-277	8.24318e-276
BPNT1	193.662	1.28	0.0360207	35.5352	1.40706e-276	2.8059e-275
SIRT2	706.822	0.695085	0.0195924	35.4773	1.10117e-275	2.19325e-274
GOT1	253.241	1.44257	0.0406622	35.4769	1.11592e-275	2.21992e-274
ZNF252P	228.384	0.969949	0.0273578	35.4543	2.49444e-275	4.95022e-274
RRP36	521.288	0.606057	0.0170987	35.4447	3.50281e-275	6.94293e-274
GPBAR1	197.041	-4.11766	0.116304	-35.4042	1.47096e-274	2.91208e-273
SGPL1	5747.59	1.47978	0.0418051	35.3972	1.88344e-274	3.72417e-273
RBBP6	3470.18	-0.952959	0.0269278	-35.3894	2.48178e-274	4.90136e-273
TCAIM	485.212	0.760766	0.0215112	35.3661	5.67649e-274	1.11704e-272
CHD4	3324.07	0.766995	0.0216992	35.3467	1.12785e-273	2.21676e-272
ELF1	7961.7	-0.903685	0.0255769	-35.3321	1.88968e-273	3.70523e-272
WSB1	2908.67	-0.772406	0.0218643	-35.3273	2.23857e-273	4.38407e-272
TNKS2	3712.43	-0.553231	0.0156743	-35.2955	6.87985e-273	1.34415e-271
ADHFE1	311.674	1.94551	0.0551369	35.2851	9.95429e-273	1.94251e-271
TMEM123	21386.9	-0.878375	0.0248957	-35.2822	1.10282e-272	2.14952e-271
EIF2B5	739.193	0.724153	0.0205411	35.2539	2.98844e-272	5.81788e-271
CNOT6	743.934	0.691126	0.0196048	35.2529	3.0919e-272	6.01216e-271
HDAC6	1197.85	-0.61596	0.0174778	-35.2424	4.49097e-272	8.71195e-271
UBE2H	1158.36	0.693872	0.0197075	35.2085	1.48235e-271	2.87218e-270
CHMP5	2811.52	-0.647445	0.0184038	-35.18	4.04292e-271	7.81505e-270
C1GALT1	1323.64	-1.04201	0.0296516	-35.1419	1.54528e-270	2.97652e-269
MRPL3	650.099	1.37864	0.0392363	35.137	1.83927e-270	3.53866e-269
MAP1LC3C	40.0158	3.46761	0.0987823	35.1036	5.94359e-270	1.14217e-268
CD164	10551.7	-0.75341	0.0214674	-35.0955	7.88396e-270	1.51328e-268
TM9SF4	1009.89	0.570507	0.0162683	35.0686	2.02816e-269	3.88838e-268
CYC1	771.428	0.817196	0.0233074	35.0617	2.58901e-269	4.95783e-268
OTUD4	3666.3	-0.894235	0.0255052	-35.0609	2.66041e-269	5.08862e-268
USP47	1016.47	0.593741	0.0169363	35.0573	3.02218e-269	5.76712e-268
C21orf33	645.683	1.07773	0.0307635	35.0328	7.12373e-269	1.35624e-267
CHCHD1	282.401	0.621499	0.017742	35.0299	7.89404e-269	1.50115e-267
PRKCD	5092.8	-0.801075	0.0228835	-35.0066	1.78433e-268	3.38919e-267
SOCS1	1629.14	-0.983737	0.0281099	-34.9961	2.57572e-268	4.88672e-267
NAT9	179.393	0.853989	0.0244189	34.9724	5.9157e-268	1.12104e-266
ARHGEF17	1248.6	-1.55561	0.0444892	-34.966	7.40979e-268	1.40256e-266
BC067244	293.751	1.55486	0.0444739	34.9612	8.76121e-268	1.65644e-266
EXOSC9	1370.51	-1.77205	0.0507374	-34.926	2.99554e-267	5.65701e-266
EIF4A2	2908.75	0.92245	0.0264196	34.9154	4.34843e-267	8.20248e-266
SLC25A24	2935.19	-1.02537	0.0293759	-34.9053	6.18427e-267	1.16386e-265
TBC1D22B	701.429	-0.664422	0.0190529	-34.8725	1.9417e-266	3.65004e-265
SSR1	5087.27	-0.677143	0.0194331	-34.8448	5.10804e-266	9.59119e-265
TP53	654.313	1.23162	0.0353616	34.8294	8.74237e-266	1.63964e-264
RNF7	504.992	0.53337	0.0153364	34.7782	5.20317e-265	9.71416e-264
AMBRA1	1190.09	-0.630743	0.0181405	-34.7698	6.95508e-265	1.29701e-263
KAT8	529.499	0.779152	0.0224098	34.7684	7.31249e-265	1.36212e-263
GOLGA1	440.188	0.582338	0.0167515	34.7634	8.70935e-265	1.62047e-263
NLK	1020.54	-0.911266	0.0262271	-34.7452	1.63955e-264	3.04711e-263
PDGFC	600.96	2.48176	0.0714546	34.732	2.58761e-264	4.80364e-263
PLSCR1	5171.93	-2.45238	0.0706128	-34.73	2.78079e-264	5.15641e-263
BTN3A1	1047.35	-1.47787	0.0426129	-34.6813	1.50633e-263	2.78688e-262
H3F3B	15801.4	-0.786012	0.0226696	-34.6724	2.05053e-263	3.78944e-262
TNFSF18	2854.11	-3.2506	0.0937704	-34.6655	2.60679e-263	4.812e-262
CIAPIN1	422.653	0.813008	0.0234932	34.6061	2.04538e-262	3.76294e-261
ZNF280D	367.642	1.2072	0.034887	34.6031	2.26542e-262	4.16309e-261
KHSRP	1872.77	0.836986	0.0241883	34.6029	2.28638e-262	4.19691e-261
DMXL1	3682.11	-1.21292	0.035075	-34.5806	4.94678e-262	9.06006e-261
AP2A1	1769.23	0.752589	0.0218105	34.5058	6.57542e-261	1.20161e-259
TGIF2	442.14	-1.09035	0.0316018	-34.5027	7.3159e-261	1.33544e-259
TMEM217	176.144	-2.36709	0.0686111	-34.5001	8.00468e-261	1.45954e-259
ZFP91	1621.76	0.530134	0.0154311	34.3549	1.19099e-258	2.15245e-257
NCBP1	922.116	0.622911	0.0181392	34.3406	1.94602e-258	3.51312e-257
HIST2H4A	640.737	-1.56812	0.0457768	-34.2558	3.57581e-257	6.43411e-256
TMEM167A	1449.78	0.547713	0.0160353	34.1567	1.06264e-255	1.90578e-254
MAF1	822.28	0.67212	0.0196805	34.1516	1.26518e-255	2.26654e-254
NREP	253.117	-1.91556	0.0561307	-34.1268	2.95008e-255	5.27923e-254
SUB1	5752.13	-0.952399	0.027917	-34.1154	4.35659e-255	7.78771e-254
MMS19	620.951	0.964679	0.0282916	34.0977	7.96895e-255	1.42295e-253
CAMKK2	1644.93	-0.949428	0.0278671	-34.0699	2.05986e-254	3.67412e-253
KLHDC2	402.233	0.747018	0.0219302	34.0635	2.56047e-254	4.56209e-253
MVP	7401.36	-0.691004	0.0202859	-34.0633	2.58093e-254	4.59354e-253
TRADD	919.735	-1.12656	0.0330771	-34.0585	3.03749e-254	5.40028e-253
MSL3	1411.53	-0.822677	0.0241683	-34.0395	5.80807e-254	1.03037e-252
SF3A3	936.682	0.958265	0.0281534	34.0373	6.25424e-254	1.10832e-252
NEK9	1130.29	0.89849	0.0263998	34.034	6.99202e-254	1.23772e-252
THOC6	297.74	0.76781	0.022564	34.0281	8.54748e-254	1.51144e-252
LRRC8A	281.909	1.10679	0.0325258	34.0281	8.57141e-254	1.51404e-252
SLC25A40	341.785	1.64882	0.0484612	34.0234	1.00441e-253	1.77225e-252
UBE2V2	657.11	0.677315	0.0199251	33.9931	2.81732e-253	4.9551e-252
BSDC1	754.699	0.509091	0.0149775	33.9903	3.09739e-253	5.44185e-252
MLLT1	438.751	1.0034	0.0295387	33.9689	6.41866e-253	1.12649e-251
RAB9A	1314.83	-0.979368	0.0288439	-33.9541	1.06129e-252	1.85863e-251
AGTPBP1	492.32	0.730601	0.0215266	33.9395	1.74542e-252	3.05345e-251
DAP3	1042.19	0.553218	0.0163026	33.9343	2.08074e-252	3.63619e-251
METAP2	909.056	0.853133	0.0251533	33.9174	3.69454e-252	6.44264e-251
NRIP1	1662.69	-1.34072	0.0395305	-33.9161	3.85166e-252	6.7095e-251
PABPC4	1948.95	1.15108	0.0339473	33.9078	5.11041e-252	8.89276e-251
RRBP1	5156.85	-1.06142	0.0313045	-33.9064	5.36825e-252	9.33153e-251
SDF2	445.843	0.48359	0.0142633	33.9044	5.73891e-252	9.96527e-251
TNFAIP8L2-SCNM1	943.576	0.682479	0.0201303	33.9031	5.99978e-252	1.04072e-250
MTMR14	1329.15	0.940183	0.0277645	33.8627	2.35732e-251	4.08469e-250
CRKL	1242.93	0.496123	0.0146564	33.8503	3.58775e-251	6.19709e-250
SLC6A12	1083.88	-2.52668	0.0746909	-33.8285	7.51228e-251	1.29622e-249
HDLBP	5809.34	0.4918	0.0145661	33.7634	6.78662e-250	1.16978e-248
SLC25A48	718.363	2.94057	0.0871245	33.7513	1.02164e-249	1.75911e-248
CAPRIN1	4568.7	0.436474	0.0129356	33.7421	1.39736e-249	2.40352e-248
TIMM21	132.802	1.72723	0.0511972	33.7367	1.67447e-249	2.87713e-248
SEC23B	2312.5	0.636451	0.0188701	33.7279	2.2546e-249	3.86988e-248
FAM50A	755.912	0.607606	0.0180196	33.7192	3.02241e-249	5.17153e-248
MBD1	875.916	0.597641	0.0177353	33.6978	6.22655e-249	1.06429e-247
GNA12	1030.54	1.16649	0.0346213	33.693	7.32886e-249	1.2514e-247
RNF216	829.202	0.543301	0.0161287	33.6853	9.49924e-249	1.62031e-247
HAGH	668.788	1.00223	0.0297782	33.6566	2.49651e-248	4.24951e-247
MOSPD1	113.242	1.53804	0.0457101	33.6476	3.37574e-248	5.74015e-247
HNRNPA0	1310.95	0.771957	0.0229426	33.6473	3.41416e-248	5.79947e-247
DPH3	530.276	0.727218	0.0216155	33.6433	3.90421e-248	6.62503e-247
TLE4	1947.33	-1.04455	0.0310675	-33.6219	8.02275e-248	1.35997e-246
SEL1L	2846.02	0.657941	0.0195755	33.6105	1.18006e-247	1.99624e-246
RAB12	1795.46	-1.00656	0.0299856	-33.5681	4.89939e-247	8.25393e-246
DAGLB	1579.25	0.682233	0.0203453	33.5328	1.6039e-246	2.69929e-245
CSNK1E	268.934	1.41116	0.042088	33.5289	1.82641e-246	3.07062e-245
PMM2	245.692	1.16428	0.0347386	33.5154	2.87306e-246	4.82533e-245
PREB	533.896	0.762084	0.0227391	33.5143	2.98507e-246	5.00832e-245
UBR2	1840.93	-0.603224	0.0180007	-33.5112	3.30714e-246	5.54301e-245
KLHL22	229.508	1.25802	0.0375674	33.487	7.44731e-246	1.24695e-244
ARFGAP2	1221.34	0.478019	0.0142967	33.4355	4.18468e-245	6.99239e-244
CIR1	996.218	-0.71658	0.0214996	-33.3299	1.42418e-243	2.36048e-242
FBXO18	664.86	0.502362	0.0150734	33.3276	1.53644e-243	2.54396e-242
LTV1	541.489	1.10033	0.033035	33.3079	2.9633e-243	4.89168e-242
ABAT	229.919	2.13628	0.0642142	33.268	1.12012e-242	1.84718e-241
COQ9	472.239	1.1991	0.0360436	33.268	1.12294e-242	1.84997e-241
OSBPL1A	2267.01	-1.21201	0.0364417	-33.2588	1.52409e-242	2.50832e-241
TAPBP	6957.89	-0.979952	0.0294756	-33.2462	2.31944e-242	3.80965e-241
UHRF1BP1L	1374.28	0.831844	0.025024	33.2418	2.68416e-242	4.40428e-241
BAIAP2-AS1	223.209	1.97761	0.059541	33.2144	6.68085e-242	1.09512e-240
TTLL13	609.195	0.528153	0.015905	33.2069	8.57219e-242	1.40375e-240
NAA50	1529.87	0.694052	0.0209201	33.1763	2.36275e-241	3.86144e-240
MAOA	5025.69	1.45909	0.0440156	33.1493	5.78751e-241	9.43031e-240
MAP4	4142.79	-0.483338	0.0145828	-33.1443	6.8375e-241	1.11301e-239
ULK1	309.709	1.16406	0.0351347	33.1315	1.04665e-240	1.70206e-239
KCTD6	103.827	0.964796	0.0291323	33.1177	1.65336e-240	2.68601e-239
CYB561	444.543	-1.627	0.0491682	-33.0905	4.06847e-240	6.60301e-239
SERPINB9	4623.21	-1.7872	0.0540145	-33.0874	4.51112e-240	7.31417e-239
HSPH1	4316.36	0.977986	0.0295586	33.0863	4.67157e-240	7.56684e-239
PREX1	3725.68	0.703776	0.0212998	33.0415	2.06313e-239	3.33848e-238
ACAP3	270.427	1.1621	0.0351736	33.039	2.23987e-239	3.6209e-238
PPP1R7	1110.21	1.18353	0.0358241	33.0373	2.36706e-239	3.82275e-238
ADNP	1228.01	0.701497	0.0212514	33.0095	5.93749e-239	9.55125e-238
SPG20	2786.27	-0.74714	0.0226756	-32.9491	4.36368e-238	7.00581e-237
RPS6KC1	1381.16	-1.23639	0.0375259	-32.9477	4.56863e-238	7.32768e-237
HDGF	2087.7	0.935597	0.0284197	32.9207	1.11205e-237	1.78015e-236
TMEM63A	1199.55	-1.08008	0.0328092	-32.9201	1.13186e-237	1.8101e-236
SLAMF7	32022.8	-2.88835	0.0877493	-32.9159	1.30221e-237	2.07846e-236
CYB5R1	697.441	1.45043	0.0441306	32.8666	6.59058e-237	1.04886e-235
KIF23	353.456	-2.19776	0.0668791	-32.8617	7.74213e-237	1.23093e-235
GIT1	599.436	1.01638	0.0309292	32.8616	7.78331e-237	1.23628e-235
TMEM218	106.517	1.18567	0.0360852	32.8574	8.91988e-237	1.41544e-235
RGS3	231.454	-2.05233	0.062465	-32.8556	9.47146e-237	1.50151e-235
TMEM55A	244.176	1.14131	0.0347386	32.8543	9.87538e-237	1.56403e-235
CAMLG	288.489	0.707376	0.0215642	32.8032	5.30023e-236	8.38623e-235
TMEM236	1068.39	1.43578	0.0437912	32.787	9.01922e-236	1.42568e-234
FAM200B	126.815	0.869954	0.0265534	32.7624	2.02173e-235	3.1927e-234
MTG2	342.634	0.503064	0.0153635	32.744	3.6924e-235	5.82539e-234
KIAA1522	761.449	-2.02796	0.0619537	-32.7335	5.21641e-235	8.21397e-234
CNTROB	320.007	1.05489	0.032232	32.728	6.23587e-235	9.80982e-234
PLCB2	2446.16	1.69355	0.0517793	32.7071	1.23694e-234	1.94213e-233
UBA6	2441.83	-0.879639	0.0269005	-32.6997	1.57741e-234	2.47198e-233
CD44	16463.9	1.55511	0.0475727	32.6891	2.23019e-234	3.49162e-233
RSL1D1	1700.32	0.966037	0.0295686	32.6711	4.02366e-234	6.2935e-233
EIF2B4	361.395	0.612775	0.0187648	32.6556	6.68334e-234	1.04336e-232
HYAL2	349.573	0.973078	0.0298174	32.6346	1.32477e-233	2.06423e-232
SLC25A11	755.156	0.70133	0.0214935	32.6299	1.5447e-233	2.40463e-232
ZFYVE16	2500.11	1.4179	0.0434573	32.6275	1.66936e-233	2.59622e-232
SIGLEC1	23435.6	-1.41662	0.0434428	-32.6088	3.07691e-233	4.78073e-232
ARRB1	2406.03	1.04395	0.0320204	32.6027	3.75538e-233	5.82938e-232
GID8	751.501	0.758811	0.0232994	32.5678	1.17201e-232	1.81242e-231
FAM160B1	886.4	-0.735876	0.0226154	-32.5388	3.01996e-232	4.66132e-231
SUGP2	968.898	0.902209	0.0277323	32.5328	3.67188e-232	5.66222e-231
PITHD1	548.628	1.11319	0.0342208	32.5298	4.04378e-232	6.22985e-231
ZMAT3	578.005	1.48048	0.0455547	32.499	1.10264e-231	1.69554e-230
FASTKD1	334.142	1.04805	0.0322926	32.4549	4.62632e-231	7.10062e-230
WIPF1	13969.7	-0.932899	0.0287579	-32.4398	7.54156e-231	1.15642e-229
VAMP2	375.478	0.860975	0.0265443	32.4354	8.69466e-231	1.33199e-229
COQ10B	1143.4	-0.753086	0.0232557	-32.3829	4.77217e-230	7.27677e-229
TMEM60	288.303	-1.32015	0.0408241	-32.3376	2.07047e-229	3.15127e-228
DHX30	667.94	0.764792	0.0236623	32.3211	3.53831e-229	5.38033e-228
CLTC	10670.6	0.630885	0.0195283	32.3062	5.71964e-229	8.68115e-228
USP22	1909.8	0.51656	0.0159903	32.3045	6.04768e-229	9.17054e-228
CD80	6664.71	-1.79738	0.0556591	-32.2927	8.84887e-229	1.34058e-227
VHL	1043.58	0.616681	0.0191025	32.2827	1.22246e-228	1.85028e-227
OGFOD1	538.284	0.696224	0.0215954	32.2394	4.95422e-228	7.49166e-227
SPR	313.787	1.48935	0.0461968	32.2393	4.96257e-228	7.49737e-227
TCEAL1	100.648	0.810489	0.0251444	32.2334	6.00997e-228	9.0714e-227
OSTC	906.041	0.721487	0.0224145	32.1884	2.5637e-227	3.85543e-226
PARG	646.065	0.615057	0.019116	32.1749	3.95871e-227	5.94786e-226
ZCCHC17	322.049	0.668123	0.020787	32.1413	1.1669e-226	1.75164e-225
FAM8A1	693.465	-1.2495	0.0389113	-32.1116	3.04091e-226	4.55221e-225
CDK5RAP1	222.39	0.757831	0.0236067	32.1024	4.08601e-226	6.11112e-225
SMURF1	1062.72	-0.737175	0.0229888	-32.0666	1.28669e-225	1.91915e-224
SPIRE1	415.594	1.03515	0.032288	32.06	1.59228e-225	2.37063e-224
CRLF3	937.56	-0.758135	0.02365	-32.0564	1.78643e-225	2.65727e-224
COPS7A	709.618	0.497067	0.015515	32.0378	3.24843e-225	4.82321e-224
GBP3	3047.7	-2.65588	0.0829292	-32.0259	4.755e-225	7.04737e-224
NARS	2224.93	0.806847	0.0252027	32.0143	6.89447e-225	1.0209e-223
ELK4	1549.72	-0.658478	0.0205784	-31.9985	1.14311e-224	1.68962e-223
SP1	2712	-0.54216	0.016945	-31.9952	1.27219e-224	1.87703e-223
TUSC2	263.562	0.58718	0.0183521	31.9952	1.27188e-224	1.87703e-223
ABI2	190.254	1.3724	0.0428966	31.9933	1.35266e-224	1.99395e-223
ABCC5	379.19	2.26849	0.070932	31.9812	1.98812e-224	2.92543e-223
C1orf43	2836.37	0.387326	0.0121321	31.9259	1.16912e-223	1.71568e-222
HIST1H2AC	519.592	-1.59318	0.0499357	-31.9047	2.30061e-223	3.37313e-222
SMARCC2	1468.24	0.628501	0.019723	31.8665	7.78925e-223	1.13798e-221
METTL22	37.7525	1.25904	0.0395165	31.8611	9.22929e-223	1.34716e-221
FCF1	636.856	0.467524	0.0146771	31.8539	1.16251e-222	1.69536e-221
LARP4	1404.02	0.567721	0.0178257	31.8485	1.38215e-222	2.01389e-221
CIZ1	725.111	0.829089	0.0260599	31.8147	4.05117e-222	5.88712e-221
C1GALT1C1	893.307	-1.0949	0.03442	-31.81	4.70319e-222	6.82859e-221
SAMSN1	7138.55	-1.14499	0.036033	-31.7762	1.37831e-221	1.99941e-220
UBXN1	1037.35	0.522877	0.0164646	31.7576	2.49144e-221	3.60775e-220
FAM76B	593.692	-0.785831	0.0247467	-31.755	2.70817e-221	3.91812e-220
DCAF5	1581.06	-0.379899	0.0119687	-31.7411	4.21973e-221	6.09426e-220
NPIPL1	9426.35	-1.95589	0.0616283	-31.7369	4.81955e-221	6.9544e-220
MED13	4797.37	-0.630146	0.0198611	-31.7276	6.46836e-221	9.32537e-220
PRADC1	96.6737	1.63563	0.0516003	31.6982	1.64696e-220	2.37024e-219
GNB4	10733.9	-1.24231	0.0392086	-31.6846	2.53616e-220	3.64672e-219
SPRYD3	570.353	0.528235	0.0167049	31.6215	1.86901e-219	2.67804e-218
STK24	2915.77	-0.740177	0.0234484	-31.5662	1.07376e-218	1.53452e-217
SCYL1	793.166	0.496095	0.0157242	31.5498	1.80498e-218	2.57504e-217
EIF4E3	1568.73	-1.11305	0.0352954	-31.5352	2.86564e-218	4.08466e-217
CUL1	1900.01	-0.726486	0.0230528	-31.5141	5.57619e-218	7.92757e-217
TMEM179B	531.949	-0.655596	0.0208174	-31.4927	1.09293e-217	1.55245e-216
FRRS1	276.851	-1.41788	0.0450769	-31.4547	3.62568e-217	5.14564e-216
SETD7	1065.08	1.04566	0.0332436	31.4545	3.64242e-217	5.16492e-216
UBE2I	1138.54	0.601655	0.0191439	31.4281	8.37151e-217	1.18605e-215
ZW10	297.904	0.725265	0.0230804	31.4234	9.7032e-217	1.37353e-215
XLOC_006057	26.525	-4.34304	0.138287	-31.406	1.67474e-216	2.36863e-215
ARHGAP25	5180.67	-0.753956	0.0240226	-31.3853	3.21437e-216	4.53833e-215
XLOC_005034	1219.48	1.41332	0.0450334	31.3839	3.35801e-216	4.73705e-215
UBE2J2	379.815	0.587752	0.0187283	31.3831	3.44327e-216	4.85315e-215
SEC62	1842.9	0.469898	0.014978	31.3725	4.80636e-216	6.76273e-215
HSPA9	3798.37	0.69203	0.0220639	31.3648	6.12078e-216	8.60479e-215
STARD4	1849.44	-1.50295	0.0479614	-31.3366	1.48021e-215	2.07737e-214
ATPAF2	183.82	1.3368	0.0426626	31.3342	1.59531e-215	2.23698e-214
TRAK2	1129.82	0.575197	0.0183613	31.3266	2.02411e-215	2.83583e-214
PDE6D	289.213	0.624809	0.0199552	31.3106	3.3461e-215	4.67998e-214
B2M	122807	-0.65134	0.0208165	-31.2896	6.45644e-215	9.01482e-214
DDX56	528.513	0.692481	0.0221353	31.284	7.69341e-215	1.07328e-213
THAP4	261.646	0.843732	0.0270185	31.228	4.44196e-214	6.18103e-213
TXLNA	1650.62	0.543301	0.0174023	31.2201	5.6828e-214	7.89428e-213
PROSC	1000.87	0.494307	0.0158505	31.1855	1.67712e-213	2.32387e-212
BC043356	3303.86	-1.49005	0.0477981	-31.1738	2.41289e-213	3.33773e-212
GALE	175.556	1.44105	0.0462502	31.1577	3.98579e-213	5.50887e-212
MRPS27	422.342	1.18722	0.0381079	31.1542	4.44247e-213	6.13487e-212
IPO8	950.255	0.630305	0.0202814	31.0779	4.78534e-212	6.58065e-211
NOL6	535.417	1.11115	0.0357668	31.0665	6.83014e-212	9.38472e-211
IL4I1	23147.7	-1.65115	0.0531533	-31.0639	7.41278e-212	1.01767e-210
SMAD4	1499.82	-0.609876	0.0196357	-31.0596	8.46145e-212	1.16067e-210
PYGL	1334.17	1.33376	0.0429519	31.0524	1.05797e-211	1.45001e-210
PTGFRN	455.383	1.60362	0.0517022	31.0164	3.24357e-211	4.43072e-210
PCBD1	729.511	0.713721	0.0230158	31.0101	3.93942e-211	5.37677e-210
PHF20L1	918.336	1.24261	0.0400805	31.0027	4.9511e-211	6.75195e-210
PHF3	1814.28	-0.580241	0.0187214	-30.9935	6.5875e-211	8.97609e-210
FARSA	586.183	1.0359	0.0334306	30.9867	8.14041e-211	1.10829e-209
LOC100093631	696.818	-3.92481	0.12667	-30.9846	8.69327e-211	1.18257e-209
ALDH9A1	1745.81	1.00582	0.0324952	30.9529	2.32207e-210	3.15355e-209
INO80D	1102.62	-0.809037	0.0261443	-30.945	2.96232e-210	4.01974e-209
SLC20A1	1026.53	1.41214	0.0456422	30.9394	3.52988e-210	4.78197e-209
C18orf8	792.772	-0.753719	0.0243672	-30.9316	4.48674e-210	6.07322e-209
KLF6	29562.3	-1.27081	0.041087	-30.9297	4.76187e-210	6.435e-209
C18orf25	757.458	-0.528953	0.0171067	-30.9208	6.28203e-210	8.4823e-209
C2CD2L	969.099	-0.829877	0.0268716	-30.8831	2.01334e-209	2.71181e-208
UBE2G2	825.648	0.959789	0.0310884	30.8729	2.76129e-209	3.71618e-208
PLEKHH1	108.693	-2.51672	0.0815406	-30.8647	3.56109e-209	4.78863e-208
CANT1	886.462	0.538274	0.0174409	30.8627	3.78544e-209	5.08614e-208
FAM98A	471.553	0.912445	0.0295651	30.8622	3.84353e-209	5.15996e-208
INPPL1	1699.74	0.771093	0.024994	30.8512	5.39792e-209	7.24082e-208
MTFP1	191.903	1.48706	0.0482128	30.8435	6.83787e-209	9.16487e-208
BET1	753.854	-1.31742	0.0427477	-30.8184	1.48345e-208	1.98181e-207
SLC39A7	1375.74	0.481583	0.01565	30.772	6.21053e-208	8.2834e-207
CHMP7	632.325	0.374575	0.0121778	30.7588	9.33588e-208	1.24418e-206
GNG5	1734.94	-0.541587	0.0176122	-30.7506	1.19882e-207	1.59635e-206
ABCE1	1204.56	1.36088	0.0442587	30.7482	1.29191e-207	1.71752e-206
MRPL34	260.162	1.0345	0.0336463	30.7462	1.37251e-207	1.82172e-206
FOXN2	2163.5	-1.23475	0.0401787	-30.7314	2.16532e-207	2.86936e-206
TKT	4003.03	0.925173	0.0301062	30.7303	2.24177e-207	2.96826e-206
FAM156A	310.125	1.01265	0.0329606	30.7229	2.81338e-207	3.7191e-206
RNF44	524.669	1.1392	0.0371899	30.6319	4.60948e-206	6.05437e-205
ZNF768	305.012	1.05687	0.0345319	30.6057	1.02664e-205	1.34629e-204
SRSF9	1234.08	0.685195	0.0223967	30.5935	1.49229e-205	1.95536e-204
PIH1D1	351.889	0.675651	0.0220885	30.5884	1.74858e-205	2.28753e-204
MINA	427.461	1.42527	0.0466259	30.5683	3.22956e-205	4.22161e-204
DCAF8	1782.62	0.554779	0.0181505	30.5655	3.52211e-205	4.60035e-204
XXYLT1	265.332	1.38672	0.0453735	30.5624	3.86949e-205	5.05005e-204
VPS29	1698.1	-0.466671	0.015272	-30.5572	4.53845e-205	5.9184e-204
MATK	422.26	1.76442	0.0577899	30.5316	9.93882e-205	1.29299e-203
ENKD1	41.6366	0.649392	0.0212751	30.5235	1.26981e-204	1.65065e-203
KLHL36	700.402	0.924104	0.030309	30.4894	3.60272e-204	4.67954e-203
DRG2	281.931	0.678938	0.0222681	30.4892	3.62271e-204	4.70178e-203
GBA2	530.365	0.599411	0.0196606	30.488	3.76229e-204	4.87907e-203
CTSO	1079.37	-0.895473	0.029378	-30.4811	4.64577e-204	6.02004e-203
HBP1	3961.94	-1.03645	0.0340841	-30.4086	4.23194e-203	5.45361e-202
PLA2G16	408.647	-2.54259	0.083623	-30.4054	4.65963e-203	6.00005e-202
MSX1	142.275	-3.8435	0.126441	-30.3976	5.91748e-203	7.61376e-202
LNPEP	3428.31	-0.673242	0.0221513	-30.3929	6.82251e-203	8.77134e-202
KIAA0196	1205.27	0.578561	0.0190413	30.3845	8.78957e-203	1.12914e-201
ASPSCR1	171.926	0.792958	0.0261102	30.3696	1.3839e-202	1.77642e-201
TEP1	2399.39	-0.783276	0.0257986	-30.3613	1.78483e-202	2.28749e-201
CUTC	139.6	0.925281	0.0304825	30.3545	2.1944e-202	2.81021e-201
KBTBD2	1250.97	-0.725299	0.0239396	-30.2971	1.25211e-201	1.60098e-200
HMG20A	634.238	0.558277	0.0184408	30.274	2.5214e-201	3.2189e-200
LYSMD2	761.792	-1.65549	0.0547225	-30.2524	4.8543e-201	6.19235e-200
DNTTIP2	1064.47	0.517636	0.0171162	30.2425	6.54056e-201	8.33693e-200
DDX27	1338.21	0.598073	0.01978	30.2363	7.90854e-201	1.00728e-199
HIF1AN	993.904	0.509183	0.0168449	30.2278	1.022e-200	1.29966e-199
FEM1A	355.49	0.728233	0.024099	30.2183	1.36022e-200	1.72843e-199
SMIM12	555.489	0.495774	0.0164188	30.1955	2.71481e-200	3.44703e-199
ELP2	936.521	1.60311	0.0531026	30.189	3.30545e-200	4.19048e-199
UBE2D3	8169.51	-0.476283	0.0157809	-30.181	4.2057e-200	5.32765e-199
RBL2	1327.52	0.816445	0.02707	30.1605	7.82092e-200	9.88438e-199
MVB12B	1839.38	-0.840781	0.0278841	-30.1527	9.90056e-200	1.24935e-198
GCC2	2082.97	-1.03003	0.0341863	-30.13	1.96291e-199	2.47508e-198
ACBD5	1374.37	-0.616259	0.0204592	-30.1214	2.54576e-199	3.20754e-198
KEAP1	1306.17	-0.442446	0.0147109	-30.076	9.97114e-199	1.25247e-197
PRCC	599.308	0.498547	0.0165842	30.0615	1.54415e-198	1.93662e-197
SCIMP	4550.51	-2.19973	0.0731867	-30.0564	1.79982e-198	2.25555e-197
ANAPC7	490.042	1.11793	0.0371948	30.0561	1.8177e-198	2.27622e-197
RING1	425.494	0.566982	0.0188789	30.0326	3.68416e-198	4.59945e-197
SEC16A	1913.65	0.589613	0.0196342	30.0298	4.00275e-198	4.98958e-197
NADK	3697.57	-1.30922	0.0436143	-30.018	5.71095e-198	7.11351e-197
PSMD10	525.608	0.548493	0.0182756	30.0123	6.77871e-198	8.43711e-197
NAA25	1232.94	-1.16886	0.0389471	-30.0116	6.93119e-198	8.62034e-197
TOLLIP	818.183	0.646606	0.0215623	29.9878	1.41509e-197	1.75729e-196
FUBP1	1882.06	-0.785771	0.0262067	-29.9836	1.60483e-197	1.98989e-196
PCM1	1690.03	0.859219	0.0286619	29.9778	1.91373e-197	2.37111e-196
TMEM214	794.391	0.683109	0.0227959	29.9663	2.695e-197	3.33407e-196
HP1BP3	1714.78	0.71245	0.0238035	29.9305	7.89999e-197	9.7586e-196
GIMAP4	1071.42	-2.46966	0.0825179	-29.9288	8.31181e-197	1.02596e-195
TTC38	907.568	-1.34012	0.0447832	-29.9245	9.43452e-197	1.16366e-195
CNIH	707.042	0.705225	0.0235849	29.9016	1.87607e-196	2.30875e-195
LOC100505876	438.09	0.720381	0.0241038	29.8867	2.93218e-196	3.60572e-195
IWS1	955.805	0.506859	0.0169717	29.8649	5.62088e-196	6.90685e-195
ZMYND15	297.593	-1.99817	0.0669072	-29.8649	5.62803e-196	6.91047e-195
ARHGAP12	803.353	-1.42209	0.0476323	-29.8555	7.45618e-196	9.14148e-195
PARP8	2092.15	-0.821471	0.0275246	-29.845	1.02049e-195	1.25022e-194
KIAA0141	584.023	0.824424	0.0276297	29.8383	1.24629e-195	1.5257e-194
TBX19	7461.24	-0.940952	0.0315392	-29.8343	1.40154e-195	1.71448e-194
SUN1	541.088	0.766912	0.0257071	29.8327	1.47092e-195	1.79801e-194
ZCCHC7	451.158	0.841819	0.0282327	29.8171	2.34473e-195	2.85974e-194
WRB	131.896	1.00273	0.0336383	29.8091	2.97642e-195	3.62478e-194
SLC41A2	3518.31	-1.42063	0.0476657	-29.8041	3.45212e-195	4.19787e-194
NELFE	458.452	0.586629	0.0196922	29.7899	5.28298e-195	6.41472e-194
GLOD4	548.674	0.739281	0.0248185	29.7875	5.66882e-195	6.87302e-194
CC2D1A	353.465	0.79332	0.026634	29.786	5.9368e-195	7.19261e-194
PSMD3	971.183	0.760876	0.025555	29.7741	8.46731e-195	1.02433e-193
CENPT	470.735	0.720426	0.0242099	29.7575	1.38734e-194	1.67585e-193
ARL3	131.157	1.07085	0.0359931	29.7515	1.65724e-194	2.00041e-193
TTC37	2586.54	-0.691505	0.0232433	-29.7507	1.69682e-194	2.04667e-193
SREK1	710.515	0.549663	0.0184777	29.7474	1.87253e-194	2.25529e-193
SCRIB	425.664	0.986698	0.0331702	29.7465	1.92321e-194	2.31464e-193
XLOC_001708	956.944	-2.84916	0.095871	-29.7187	4.40215e-194	5.2942e-193
HPSE	571.504	-3.28143	0.110481	-29.7014	7.35781e-194	8.83584e-193
IMP4	324.278	0.974425	0.0328114	29.6978	8.2043e-194	9.84516e-193
COASY	1413.38	-0.747394	0.0251737	-29.6895	1.04867e-193	1.25748e-192
SGPP1	2153.22	-0.88474	0.0298042	-29.6851	1.196e-193	1.43311e-192
BAIAP2	351.23	1.55375	0.0523596	29.6746	1.63258e-193	1.95337e-192
ADCY7	12341.8	-0.798999	0.0269311	-29.6683	1.97116e-193	2.35504e-192
CDC23	427.328	0.658775	0.0222162	29.6529	3.11145e-193	3.71201e-192
ZNF589	398.182	1.27409	0.0429725	29.6489	3.50886e-193	4.177e-192
PANK3	1972.47	0.637937	0.0215198	29.6441	4.03848e-193	4.80049e-192
GLRX5	247.289	0.951963	0.0321386	29.6205	8.13262e-193	9.63221e-192
FEM1C	2196.14	-1.07331	0.0362538	-29.6053	1.27552e-192	1.50853e-191
FUBP3	684.811	0.451929	0.0152697	29.5964	1.66272e-192	1.96364e-191
FAM69A	708.854	-1.29756	0.0438521	-29.5895	2.03703e-192	2.40396e-191
C8orf33	405.045	0.750736	0.0253834	29.5759	3.0553e-192	3.60046e-191
ADM	775.002	-1.948	0.0659041	-29.5581	5.16866e-192	6.08217e-191
IGBP1	575.62	0.578563	0.0195756	29.5553	5.6163e-192	6.60419e-191
AIMP1	468.697	0.636339	0.0215435	29.5374	9.54197e-192	1.12043e-190
SLC30A5	796.536	0.786289	0.0266403	29.5151	1.84501e-191	2.16334e-190
METTL16	287.017	0.830253	0.028135	29.5096	2.16763e-191	2.5398e-190
ZNF862	177.925	0.90727	0.030745	29.5095	2.17382e-191	2.54523e-190
RANBP2	3136.63	0.633247	0.0214638	29.503	2.6357e-191	3.08162e-190
KCTD2	421.437	0.855401	0.0289965	29.5002	2.86505e-191	3.3474e-190
SUFU	742.182	0.97443	0.0330423	29.4904	3.82399e-191	4.46459e-190
PLAGL1	927.801	-1.1001	0.0373087	-29.4865	4.28621e-191	5.00068e-190
HIST2H2BF	354.009	-1.93783	0.0658055	-29.4478	1.3433e-190	1.55945e-189
YIF1A	229.177	0.844121	0.0286719	29.4407	1.65547e-190	1.92049e-189
PTMS	2124.04	-1.21165	0.0411755	-29.4264	2.5245e-190	2.92243e-189
MMD	310.102	1.79546	0.0610191	29.4246	2.66138e-190	3.07871e-189
RABGGTB	595.611	0.814564	0.0277265	29.3786	1.03195e-189	1.19125e-188
CYLD	5694.05	-0.678106	0.0230973	-29.3587	1.85089e-189	2.1351e-188
ANKRD52	1220.46	0.730454	0.0248927	29.3441	2.84192e-189	3.2737e-188
PIK3AP1	12298.7	-1.24792	0.0425461	-29.3309	4.18155e-189	4.81011e-188
DAGLA	854.855	1.28684	0.0439105	29.306	8.69296e-189	9.98563e-188
ZNF259	541.045	0.669009	0.0228448	29.285	1.61e-188	1.84296e-187
MRPL15	449.329	1.00127	0.0342371	29.2451	5.18472e-188	5.91426e-187
RRP1B	2651.66	0.943941	0.0322974	29.2266	8.91804e-188	1.01517e-186
NUPL2	270.586	0.736519	0.0252502	29.1688	4.82349e-187	5.4604e-186
TAOK2	890.158	0.579313	0.0198784	29.1428	1.03197e-186	1.16582e-185
MRPL35	364.131	0.95054	0.0326354	29.1261	1.68004e-186	1.89665e-185
ABCF3	863.647	0.763668	0.0262211	29.1242	1.77515e-186	2.00264e-185
XPNPEP1	1982.69	-0.593636	0.0203892	-29.1152	2.30382e-186	2.59548e-185
ZNF438	935.576	-0.976232	0.033531	-29.1143	2.36559e-186	2.66324e-185
NDUFA8	334.523	0.741756	0.0254793	29.1121	2.52459e-186	2.84029e-185
ST6GALNAC4	86.6453	1.66277	0.0571787	29.0803	6.37176e-186	7.15873e-185
EFCAB14	3453.01	0.331209	0.0113898	29.0793	6.55395e-186	7.35838e-185
CNPPD1	2902.65	-0.740794	0.0254767	-29.0774	6.93919e-186	7.78557e-185
PRKD2	520.127	-1.19865	0.041233	-29.0701	8.57622e-186	9.61569e-185
MELK	239.934	-1.4901	0.0512596	-29.0697	8.67024e-186	9.71447e-185
ABHD4	431.712	1.36772	0.0470558	29.066	9.66722e-186	1.08241e-184
NOP58	596.424	1.18623	0.0408371	29.0479	1.63805e-185	1.83032e-184
MPV17L2	124.419	0.916271	0.0315574	29.0351	2.37454e-185	2.65146e-184
BLVRA	4013.64	-0.966948	0.0333064	-29.0319	2.60825e-185	2.91045e-184
ZFYVE21	296.217	0.70195	0.024179	29.0314	2.63922e-185	2.94299e-184
C12orf44	283.012	0.62048	0.0213762	29.0266	3.03834e-185	3.38575e-184
RCSD1	1980.6	-1.31744	0.0454098	-29.0123	4.6032e-185	5.12259e-184
MBTPS1	1202.54	0.609748	0.0210219	29.0053	5.63832e-185	6.26598e-184
SLC16A6	198.544	1.84979	0.0638015	28.9929	8.07571e-185	8.96256e-184
SSFA2	2398.77	-0.441855	0.015241	-28.9912	8.48285e-185	9.40804e-184
C20orf112	359.693	1.36501	0.0471351	28.9595	2.13358e-184	2.36468e-183
NFE2L3	1137.13	-2.12306	0.0733399	-28.9482	2.95737e-184	3.27328e-183
RIN1	401.4	-1.89271	0.0654291	-28.9277	5.36157e-184	5.92628e-183
RAB43	312.89	-2.51611	0.0870059	-28.9189	6.91387e-184	7.63694e-183
PPP6R3	1292.04	0.509776	0.0176284	28.9179	7.10813e-184	7.84623e-183
TPRG1L	463.64	1.06447	0.0368108	28.9172	7.24862e-184	7.99592e-183
UBR5	2857.66	0.528589	0.0182823	28.9127	8.27262e-184	9.11935e-183
PUF60	1294.25	0.564598	0.0195343	28.9028	1.09972e-183	1.20984e-182
DEDD2	299.272	1.07607	0.0372399	28.8957	1.35019e-183	1.48439e-182
LAMTOR1	1291.87	0.72142	0.0249705	28.8909	1.55476e-183	1.70816e-182
TFG	2107.1	-0.525041	0.0181798	-28.8804	2.10382e-183	2.30983e-182
ZNF473	122.434	0.812145	0.0281244	28.8768	2.33417e-183	2.56102e-182
ADIPOR1	2498.45	0.454206	0.0157666	28.8081	1.69832e-182	1.85592e-181
SEC13	752.823	0.623391	0.0216671	28.7713	4.90507e-182	5.34956e-181
TGFB1	2549.59	-1.15748	0.0402496	-28.7575	7.30874e-182	7.96575e-181
RBM7	1003.85	-0.464292	0.0161539	-28.7417	1.15055e-181	1.25231e-180
FNBP1	6001.79	-0.8018	0.0279004	-28.7379	1.28371e-181	1.39633e-180
HDAC2	1202.2	0.916604	0.0318995	28.7341	1.43073e-181	1.55521e-180
BOC	305.924	-3.76722	0.13111	-28.7332	1.46857e-181	1.59529e-180
COQ2	294.691	-0.936711	0.0326139	-28.7212	2.07456e-181	2.25207e-180
PPP6C	1175.74	0.421407	0.0146787	28.7088	2.96526e-181	3.21315e-180
SMARCB1	554.593	0.660002	0.0230263	28.663	1.10467e-180	1.19365e-179
SUCLG1	643.253	0.774674	0.0270382	28.6511	1.55347e-180	1.6775e-179
BIRC6	2952.58	0.553526	0.0193203	28.6499	1.60672e-180	1.73387e-179
NUDT16	929.654	1.09144	0.038116	28.6348	2.47943e-180	2.67211e-179
CCAR1	1215.33	0.610036	0.021313	28.6228	3.49979e-180	3.76682e-179
GTF2A2	794.787	0.964749	0.0337162	28.6138	4.52331e-180	4.86203e-179
SNRPD3	881.377	0.80127	0.0280218	28.5946	7.85113e-180	8.42801e-179
DOCK7	2386.29	-0.847834	0.0296555	-28.5895	9.07832e-180	9.73899e-179
PRRC1	861.009	0.646583	0.0226362	28.5641	1.87707e-179	2.01105e-178
SLC18B1	365.853	-2.8142	0.0985398	-28.5591	2.16692e-179	2.32006e-178
COG8	212.887	0.713279	0.0249769	28.5576	2.26179e-179	2.42005e-178
PIP4K2B	564.695	0.921989	0.0322863	28.5567	2.32019e-179	2.48092e-178
PPIP5K2	1055.82	0.910877	0.0319262	28.5307	4.8743e-179	5.20518e-178
SNX10	6537.56	-2.23034	0.0781899	-28.5247	5.7898e-179	6.17881e-178
VPS8	898.045	0.819434	0.0287456	28.5064	9.75483e-179	1.03967e-177
RAB24	677.25	-0.92903	0.0326002	-28.4976	1.253e-178	1.33371e-177
CSRNP2	521.904	-1.37246	0.0481875	-28.4816	1.98195e-178	2.10688e-177
XLOC_007623	131.885	3.31742	0.116481	28.4803	2.05192e-178	2.17985e-177
MGAT5	2934.94	1.22471	0.0430153	28.4714	2.65043e-178	2.81203e-177
WDTC1	734.863	0.970425	0.0340884	28.4679	2.92695e-178	3.1034e-177
XRCC1	349.892	0.726737	0.0255306	28.4653	3.15296e-178	3.34088e-177
PPIG	1411.09	0.405394	0.0142455	28.4576	3.9266e-178	4.15525e-177
SERPINB1	3661.22	-0.914746	0.0321444	-28.4574	3.94705e-178	4.1742e-177
PSMB2	1572.76	-0.467801	0.0164414	-28.4526	4.52567e-178	4.78303e-177
STK11IP	390.065	0.575305	0.0202271	28.4423	6.06299e-178	6.40365e-177
SELT	3397.51	0.492613	0.0173199	28.442	6.12046e-178	6.46018e-177
DNAJC11	594.927	0.703138	0.0247241	28.4394	6.59454e-178	6.95609e-177
UBLCP1	857.294	0.449364	0.0158041	28.4334	7.82571e-178	8.24946e-177
PSMG3	182.758	0.88097	0.0309998	28.4185	1.19312e-177	1.25611e-176
PSMD1	1849.75	0.503035	0.017701	28.4184	1.19675e-177	1.25913e-176
ILVBL	218.485	1.10487	0.0389047	28.3995	2.05143e-177	2.15696e-176
SCAPER	347.193	-1.00316	0.0353286	-28.3951	2.32415e-177	2.44214e-176
CAST	10102.3	-0.710648	0.0250279	-28.3942	2.38364e-177	2.50305e-176
RQCD1	832.25	0.715509	0.0252342	28.3547	7.31682e-177	7.64419e-176
SBF2	1623.43	-0.735452	0.0259735	-28.3155	2.22586e-176	2.31954e-175
TRAPPC12	429.678	0.777523	0.0274923	28.2815	5.8337e-176	6.07149e-175
BRMS1	416.982	0.484647	0.0171371	28.2806	5.9933e-176	6.23364e-175
KIAA1143	432.38	0.889527	0.0314614	28.2736	7.30048e-176	7.58843e-175
RPAIN	241.995	0.738722	0.0261352	28.2654	9.21225e-176	9.56347e-175
UFM1	1175.17	0.616289	0.0218237	28.2395	1.91702e-175	1.98507e-174
UCKL1	214.158	0.796834	0.0282383	28.2182	3.50006e-175	3.61746e-174
UBE2Z	9680.73	-1.09104	0.0386671	-28.2161	3.71042e-175	3.83246e-174
SRP72	1697.62	0.739524	0.0262103	28.215	3.83103e-175	3.95455e-174
PRMT5	316.722	1.27135	0.0450793	28.2024	5.45834e-175	5.6237e-174
SLC7A6	427.85	1.51223	0.0536216	28.2019	5.54109e-175	5.70538e-174
USF1	1361.03	-0.580078	0.0205805	-28.1858	8.73623e-175	8.9896e-174
ACP1	569.43	0.563745	0.0200012	28.1855	8.80025e-175	9.04979e-174
PDCD11	545.87	1.23379	0.0438047	28.1656	1.54303e-174	1.58579e-173
CCDC106	120.832	1.21211	0.0430357	28.1653	1.55801e-174	1.60018e-173
LOC100128993	41.6614	-3.20421	0.113774	-28.1628	1.67077e-174	1.71492e-173
ACER3	1086.73	0.679593	0.0241316	28.1619	1.71398e-174	1.75817e-173
UBE2K	1152.79	0.370656	0.0131617	28.1617	1.72419e-174	1.76753e-173
PPIL1	243.584	1.19823	0.0425682	28.1485	2.49859e-174	2.55821e-173
ITPR1	1682.2	-1.08739	0.0386658	-28.1228	5.1506e-174	5.26691e-173
NOP2	428.75	1.09746	0.0390326	28.1166	6.14648e-174	6.28136e-173
C4orf33	448.708	-0.864116	0.030734	-28.116	6.2452e-174	6.37828e-173
DLST	1603.6	0.466428	0.0165914	28.1126	6.86945e-174	7.01146e-173
DDX59	545.463	-0.839912	0.029879	-28.1105	7.29519e-174	7.44137e-173
SNX12	777.604	0.727005	0.025875	28.0969	1.06998e-173	1.09006e-172
SLC37A4	291.527	0.914969	0.0325711	28.0914	1.24671e-173	1.26853e-172
ZNF23	108.622	0.402693	0.0143363	28.089	1.3362e-173	1.35874e-172
LIMD1	1291.18	-0.899838	0.0320427	-28.0825	1.60383e-173	1.62988e-172
KHDRBS1	2918.78	-0.418261	0.014896	-28.0787	1.78371e-173	1.81156e-172
SYS1-DBNDD2	578.146	1.11924	0.0398697	28.0724	2.13168e-173	2.16362e-172
PRPF8	5213.04	0.73578	0.0262104	28.072	2.1512e-173	2.18208e-172
MRFAP1L1	465.675	0.802455	0.0286094	28.0487	4.1479e-173	4.19447e-172
HNRNPH3	1431.01	0.5734	0.0204458	28.0449	4.61488e-173	4.66381e-172
RTEL1-TNFRSF6B	597.562	1.06254	0.0378898	28.0428	4.88513e-173	4.93389e-172
DNM1L	1375.22	0.470545	0.0167797	28.0425	4.92599e-173	4.97209e-172
SGK223	1125.89	1.41345	0.0504258	28.0303	6.94729e-173	7.008e-172
PLEKHA2	2541.43	-0.821205	0.0293051	-28.0226	8.61097e-173	8.68087e-172
NOC3L	524.616	-0.864702	0.0308656	-28.0151	1.06386e-172	1.07184e-171
TNFRSF21	172.463	2.48461	0.0887152	28.0066	1.34976e-172	1.35821e-171
MRPL55	71.2343	1.04783	0.0374247	27.9984	1.70084e-172	1.70939e-171
MBOAT1	223.599	-1.76383	0.0630212	-27.9878	2.28778e-172	2.29787e-171
APOBEC3B	537.842	-4.07422	0.145581	-27.986	2.40702e-172	2.41616e-171
LRPPRC	1596.06	1.08507	0.0387849	27.9766	3.13107e-172	3.14104e-171
GNA15	1412.09	0.944278	0.0337721	27.9602	4.94875e-172	4.9554e-171
TMEM71	212.564	2.5943	0.0928014	27.9554	5.66607e-172	5.67022e-171
RER1	1346.99	0.331524	0.0118682	27.9339	1.03546e-171	1.03558e-170
TTC3	1397.57	1.20612	0.0432246	27.9036	2.41374e-171	2.41109e-170
GOLIM4	680.609	0.676917	0.0242593	27.9034	2.42696e-171	2.42283e-170
CCNL1	2739.86	-0.78254	0.0280642	-27.8839	4.17773e-171	4.16806e-170
DDX5	12169.9	0.625001	0.0224177	27.8798	4.68415e-171	4.67047e-170
REXO2	156.554	1.00269	0.0359654	27.8792	4.76495e-171	4.74815e-170
TMEM241	39.756	1.3943	0.0500123	27.8792	4.77005e-171	4.75035e-170
COMMD2	496.604	0.697172	0.0250089	27.8769	5.08317e-171	5.05909e-170
CCT3	1839.15	1.01129	0.0362946	27.8634	7.41132e-171	7.36281e-170
NONO	3598.39	0.531392	0.0190721	27.8623	7.65354e-171	7.59884e-170
ANKHD1-EIF4EBP3	2938.45	0.320771	0.0115152	27.8563	9.03584e-171	8.96041e-170
CXXC1	460.205	0.733334	0.0263302	27.8514	1.03482e-170	1.02556e-169
SLC30A1	1634.28	-1.78551	0.0641412	-27.8371	1.5426e-170	1.52787e-169
SNHG16	371.941	1.69158	0.0607698	27.8358	1.59812e-170	1.58191e-169
SLC44A2	442.115	-2.36027	0.0848147	-27.8286	1.95552e-170	1.93335e-169
TRIM28	2927.1	0.998331	0.0358976	27.8105	3.235e-170	3.19639e-169
SRPRB	424.32	0.948276	0.0341453	27.7718	9.49909e-170	9.37441e-169
GSPT1	1826.76	0.54886	0.0197648	27.7695	1.01228e-169	9.98396e-169
EFHD2	2939.75	0.943759	0.033988	27.7675	1.07277e-169	1.05742e-168
MRPS16	57.3687	0.521631	0.0187959	27.7523	1.63304e-169	1.60677e-168
UQCRC2	2476.41	0.702607	0.0253189	27.7503	1.72649e-169	1.6977e-168
IP6K2	408.593	0.53253	0.0191927	27.7465	1.92256e-169	1.88936e-168
CDC34	257.352	0.680548	0.0245281	27.7457	1.96477e-169	1.92969e-168
ARF4	2246.56	0.536021	0.0193199	27.7446	2.02651e-169	1.98913e-168
RNF19A	4509.92	-0.948715	0.0342085	-27.7333	2.77072e-169	2.718e-168
C5	437.201	-1.72368	0.062176	-27.7226	3.72723e-169	3.65193e-168
GRAMD4	514.661	1.61495	0.0583147	27.6937	8.31608e-169	8.13349e-168
MPV17	867.681	0.524195	0.0189307	27.6903	9.14399e-169	8.92723e-168
TMBIM1	5627.22	-0.863737	0.0312042	-27.6802	1.20922e-168	1.17985e-167
TOMM40	344.204	1.56341	0.0565252	27.6586	2.19793e-168	2.13946e-167
MRPL33	260.406	0.571811	0.0206972	27.6274	5.21374e-168	5.07203e-167
AATF	835.952	0.461049	0.0166888	27.6263	5.38432e-168	5.23486e-167
METTL2B	254.079	0.736321	0.0266721	27.6064	9.3253e-168	9.0557e-167
ACTR8	439.199	0.529253	0.0191802	27.5938	1.32193e-167	1.28295e-166
CALU	2290.68	1.11495	0.040415	27.5876	1.56827e-167	1.52113e-166
ART3	1021	-6.50314	0.235786	-27.5806	1.90037e-167	1.84106e-166
TIMM44	166.497	0.993509	0.0360463	27.562	3.17405e-167	3.07318e-166
PTPN11	1651.85	0.547325	0.0198701	27.5452	5.05194e-167	4.88852e-166
EIF3J	865.854	0.709051	0.0257428	27.5437	5.26662e-167	5.09023e-166
COPS3	637.838	0.851288	0.0309098	27.541	5.66755e-167	5.47129e-166
DAB2	2560.27	1.7561	0.063774	27.5363	6.46536e-167	6.2378e-166
NR4A3	31490.2	-2.50148	0.0909099	-27.516	1.12992e-166	1.08951e-165
LIN37	101.566	0.704103	0.0256038	27.5	1.75719e-166	1.69335e-165
EIF4B	3373.71	1.03297	0.0375676	27.4962	1.94842e-166	1.87652e-165
COPZ1	1198.93	0.544545	0.0198075	27.4919	2.1955e-166	2.11325e-165
TRA2A	1240.67	-0.76131	0.0276946	-27.4894	2.34898e-166	2.25966e-165
VSIG10L	285.322	-0.938319	0.0341467	-27.4791	3.12097e-166	3.00053e-165
PSMD4	1380.21	0.43817	0.0159477	27.4754	3.45807e-166	3.32267e-165
AL831948	42.1432	-1.50313	0.0547225	-27.4682	4.21653e-166	4.04905e-165
COPS5	583.14	0.419884	0.0152867	27.4672	4.33061e-166	4.15617e-165
ESRRA	219.769	0.879032	0.0320095	27.4616	5.05084e-166	4.84172e-165
GLT8D1	293.01	0.659897	0.0240316	27.4596	5.33517e-166	5.11129e-165
RNF220	572.458	0.652389	0.0237666	27.4499	6.97215e-166	6.67177e-165
LOC284023	97.3787	0.956357	0.0348467	27.4447	8.03621e-166	7.68551e-165
IKZF4	212.219	1.65931	0.0604685	27.4409	8.91138e-166	8.51751e-165
SKIV2L2	1010.63	0.780312	0.0284478	27.4296	1.21537e-165	1.1603e-164
POP5	126.471	1.03719	0.0378188	27.4252	1.37345e-165	1.30893e-164
CNOT3	458.928	0.534675	0.0194986	27.4211	1.5352e-165	1.46223e-164
GALNT11	526.646	0.782008	0.0285336	27.4065	2.29244e-165	2.17968e-164
TRAF3	1182.27	0.89135	0.0325604	27.3753	5.40251e-165	5.12785e-164
UPF3A	232.984	0.872408	0.0318704	27.3736	5.64958e-165	5.35925e-164
ICMT	745.382	1.11319	0.0407263	27.3334	1.70114e-164	1.61279e-163
TADA3	1082.13	0.645723	0.0236297	27.3267	2.04324e-164	1.93488e-163
OLA1	744.629	0.833059	0.0304904	27.322	2.32411e-164	2.19958e-163
ACSL1	5042.81	-1.34824	0.049356	-27.3167	2.68936e-164	2.54379e-163
DDX18	977.198	0.816204	0.0298823	27.314	2.89333e-164	2.73515e-163
PSMD9	419.93	0.5511	0.020182	27.3064	3.55631e-164	3.35801e-163
BRCA2	1517.21	-1.28214	0.0469596	-27.3031	3.89274e-164	3.67356e-163
SF1	2392.58	0.525189	0.0192432	27.2921	5.25855e-164	4.95392e-163
ATXN7	1740.78	-0.732939	0.0268709	-27.2764	8.09295e-164	7.61537e-163
RANBP3	679.784	0.418947	0.0153666	27.2634	1.15329e-163	1.08398e-162
GLTP	349.894	1.11992	0.0410847	27.2588	1.30817e-163	1.22815e-162
CSAG3	75.3192	-6.53259	0.239652	-27.2586	1.31356e-163	1.2325e-162
BLCAP	722.79	0.559382	0.0205279	27.2498	1.67119e-163	1.56538e-162
ZC3H15	1103.89	0.56017	0.0205649	27.2392	2.2343e-163	2.09165e-162
KDELC2	1012.48	-1.18121	0.0434187	-27.2052	5.64393e-163	5.28055e-162
MAEA	591.279	0.709654	0.026089	27.2013	6.27374e-163	5.86646e-162
CERS2	2279.42	0.49145	0.0180897	27.1673	1.58114e-162	1.47429e-161
LINC00869	77.9467	-1.71606	0.0631836	-27.16	1.9311e-162	1.79958e-161
CNOT4	753.403	-0.489238	0.0180159	-27.1558	2.15994e-162	2.01169e-161
CABIN1	1188.35	0.954941	0.0351862	27.1396	3.35738e-162	3.12339e-161
FAM91A1	3365.19	-0.708209	0.0260986	-27.1359	3.71133e-162	3.45072e-161
GSTO1	3126.05	-0.758594	0.0279568	-27.1345	3.85697e-162	3.58207e-161
DMPK	425.404	2.00589	0.073945	27.1268	4.75707e-162	4.41301e-161
GNL3	812.01	0.795679	0.0293323	27.1264	4.81465e-162	4.4639e-161
SLA	6623.44	0.748553	0.0276091	27.1126	7.00159e-162	6.48052e-161
ACSM5	506.346	-1.67538	0.0618015	-27.1091	7.6922e-162	7.11572e-161
RCOR3	333.747	0.744054	0.0274748	27.0813	1.63329e-161	1.50833e-160
EDC4	851.614	0.526663	0.0194705	27.0493	3.89764e-161	3.59337e-160
SHC1	1527.89	-0.322623	0.0119284	-27.0468	4.17065e-161	3.84291e-160
LONRF1	994.028	1.49604	0.055318	27.0444	4.43948e-161	4.08602e-160
POLDIP2	975.208	0.544471	0.020148	27.0236	7.79658e-161	7.16778e-160
CERK	803.653	1.35398	0.050124	27.0126	1.05237e-160	9.66416e-160
HEXDC	881.864	-0.935361	0.0346433	-26.9997	1.48851e-160	1.3654e-159
OIP5-AS1	1618.96	1.0662	0.0394963	26.9949	1.69608e-160	1.55493e-159
KIAA1551	2241.49	-1.25636	0.0465433	-26.9933	1.77145e-160	1.62312e-159
DESI2	623.901	0.509522	0.0188974	26.9625	4.07311e-160	3.72581e-159
PVRL1	322.523	2.10574	0.078142	26.9476	6.08722e-160	5.56196e-159
PTOV1	343.058	0.725116	0.0269177	26.9383	7.83095e-160	7.13535e-159
PSMD6	703.099	0.539892	0.0200459	26.9328	9.07933e-160	8.26365e-159
REV3L	1125.37	1.81686	0.0674682	26.9292	9.9948e-160	9.08679e-159
OTOF	589.028	-3.78395	0.140534	-26.9256	1.10255e-159	1.00183e-158
XLOC_004279	21.2126	-3.22482	0.119801	-26.9181	1.34712e-159	1.22338e-158
ZNF780B	159.721	0.949722	0.035284	26.9165	1.40667e-159	1.27675e-158
MORF4L1	3635.35	0.427043	0.0158658	26.916	1.42775e-159	1.29517e-158
TMEM62	531.3	-1.24023	0.0461046	-26.9003	2.1806e-159	1.97592e-158
CENPB	756.453	0.627572	0.0233579	26.8676	5.24747e-159	4.75229e-158
EIF2S3	2152.77	0.592792	0.0220647	26.866	5.48165e-159	4.96164e-158
ETV6	506.036	-2.25112	0.083803	-26.862	6.10597e-159	5.52368e-158
MKRN1	2457.45	-0.572248	0.0213125	-26.8504	8.34734e-159	7.53052e-158
MRPS5	432.147	0.752714	0.0280659	26.8196	1.91154e-158	1.7207e-157
TYK2	1498.52	0.73962	0.0275948	26.8029	2.9916e-158	2.68998e-157
CR627148	344.261	-1.5643	0.0583914	-26.79	4.22884e-158	3.79831e-157
XLOC_007838	705.04	2.32457	0.0868677	26.76	9.45777e-158	8.47631e-157
DISC1	358.884	-1.81266	0.0677794	-26.7435	1.46821e-157	1.31513e-156
GLE1	920.892	0.327135	0.0122342	26.7395	1.63672e-157	1.46527e-156
DDB1	2847.79	0.789167	0.0295427	26.7128	3.343e-157	2.98629e-156
TAX1BP1	5060.1	-0.414704	0.0155285	-26.706	4.00585e-157	3.57647e-156
CD86	8643.01	-1.11933	0.0419325	-26.6936	5.59172e-157	4.98691e-156
P2RX7	3509.54	-1.59348	0.0597092	-26.6874	6.59984e-157	5.88279e-156
PTDSS1	1403.26	0.759825	0.0284892	26.6706	1.0328e-156	9.19593e-156
PCMTD2	278.779	1.14667	0.0429945	26.6701	1.04698e-156	9.31707e-156
SEH1L	533.036	0.733045	0.0275011	26.6551	1.56006e-156	1.38755e-155
CAPN10	44.7233	0.872753	0.0327787	26.6256	3.42667e-156	3.04115e-155
DARS	1525.06	0.722146	0.0271401	26.6081	5.47217e-156	4.84863e-155
SRD5A1	663.544	-0.831896	0.0312717	-26.6022	6.39474e-156	5.66303e-155
ST13	3342.95	0.64982	0.0244305	26.5987	7.02374e-156	6.2167e-155
SDHAF2	418.332	0.419706	0.0157814	26.595	7.76173e-156	6.86618e-155
MOAP1	280.867	0.68315	0.0257029	26.5787	1.19653e-155	1.05619e-154
YWHAG	4639.28	0.526723	0.0198229	26.5714	1.45351e-155	1.27822e-154
KLHDC3	849.843	0.838389	0.0315546	26.5695	1.52932e-155	1.34416e-154
C12orf4	414.75	0.959467	0.0361162	26.5661	1.6737e-155	1.46948e-154
THOC2	2348.91	-0.611592	0.0230232	-26.5641	1.7642e-155	1.54811e-154
CSDE1	14200.7	-0.373898	0.0140794	-26.5563	2.17021e-155	1.90338e-154
ALDH1A1	1436.81	-2.6094	0.098276	-26.5518	2.45133e-155	2.14878e-154
CHMP2B	965.138	0.487315	0.0183622	26.539	3.44099e-155	3.01468e-154
KPNA1	2347.93	-0.560168	0.0211265	-26.5149	6.52234e-155	5.70818e-154
ALKBH5	794.672	0.620679	0.0234265	26.4948	1.11397e-154	9.73878e-154
CCDC137	375.111	0.577167	0.0217864	26.492	1.19748e-154	1.04633e-153
XLOC_008273	237.535	3.11478	0.117672	26.4699	2.15126e-154	1.87672e-153
ZNF32	149.854	0.854607	0.0322869	26.4691	2.19747e-154	1.916e-153
NBN	7017.49	-1.32918	0.0502226	-26.4658	2.4027e-154	2.09272e-153
IGFBP4	4791.24	-2.16937	0.0819785	-26.4627	2.60784e-154	2.2702e-153
SSU72	699.054	0.776572	0.0293469	26.4619	2.66452e-154	2.3183e-153
EPT1	1313.74	-0.893878	0.0337926	-26.4519	3.46789e-154	3.01568e-153
SAV1	1380.1	-0.962087	0.036383	-26.4433	4.35674e-154	3.78462e-153
PLAU	3991.83	2.28912	0.0866249	26.4256	6.95944e-154	6.03912e-153
ACVR2B	116.706	0.863489	0.0326798	26.4227	7.51305e-154	6.51608e-153
CCNY	1283.58	0.713176	0.0269923	26.4214	7.77414e-154	6.73896e-153
SDCCAG3	209.194	1.02605	0.0388391	26.418	8.52304e-154	7.38423e-153
RAB13	2639.54	-0.571149	0.0216247	-26.4118	1.00279e-153	8.68341e-153
RAB3IL1	137.552	2.96661	0.112377	26.3986	1.4216e-153	1.2297e-152
TMEM167B	1228.14	0.482735	0.0182961	26.3846	2.05602e-153	1.77661e-152
UNC50	439.52	0.52538	0.0199185	26.3765	2.54833e-153	2.1997e-152
POGK	1390.38	0.360795	0.0136792	26.3755	2.61519e-153	2.25622e-152
ARMC1	415.348	0.688876	0.0261273	26.3662	3.35007e-153	2.88568e-152
GTF3C6	686.51	0.701627	0.0266191	26.358	4.15601e-153	3.57613e-152
XPO4	507.593	0.615903	0.0233701	26.3543	4.57887e-153	3.93792e-152
RPAP3	836.845	-0.673415	0.0255561	-26.3504	5.07527e-153	4.36026e-152
XYLT1	735.983	1.17981	0.0447925	26.3395	6.77107e-153	5.81411e-152
SPTAN1	3935.27	1.00735	0.0382728	26.3203	1.12317e-152	9.62915e-152
PARP4	9752.06	-0.768251	0.0291914	-26.3177	1.20241e-152	1.03031e-151
MRPL52	164.224	0.734693	0.027932	26.3029	1.77653e-152	1.52067e-151
CUL9	74.288	1.16145	0.0441666	26.2971	2.07052e-152	1.7714e-151
INO80	820.806	0.450509	0.0171355	26.2909	2.43721e-152	2.08077e-151
TRIM27	696.902	0.505425	0.01925	26.2558	6.14013e-152	5.21768e-151
BFAR	715.854	0.331127	0.0126117	26.2556	6.17185e-152	5.24191e-151
EIF4G2	18620	0.310566	0.0118372	26.2365	1.02031e-151	8.65682e-151
SDS	55.8459	-3.83628	0.146273	-26.2269	1.31302e-151	1.11288e-150
TCF3	511.577	1.01053	0.038538	26.2217	1.50417e-151	1.27423e-150
DDO	201.125	-2.0687	0.0789092	-26.2162	1.73883e-151	1.4715e-150
SIGLEC9	380.756	1.94867	0.0743357	26.2144	1.82102e-151	1.54025e-150
LILRA5	574.272	-2.40669	0.0918096	-26.2139	1.84301e-151	1.55805e-150
ARHGEF11	6376.65	-0.940623	0.0359001	-26.2011	2.583e-151	2.18026e-150
ATXN1	3101.74	1.43152	0.054671	26.1842	4.02104e-151	3.39058e-150
ALDH1L2	629.061	-1.53863	0.0587752	-26.1783	4.70025e-151	3.96126e-150
TMEM129	326.108	0.726391	0.0277525	26.1739	5.2754e-151	4.44141e-150
KIAA1429	848.622	0.421211	0.0160973	26.1665	6.39722e-151	5.3776e-150
CRLF2	2736.62	0.933325	0.0356796	26.1585	7.88897e-151	6.6248e-150
NUDT16L1	139.497	1.05507	0.0403347	26.1579	8.00324e-151	6.71731e-150
ANO6	5309.45	-0.644284	0.0246415	-26.1463	1.08714e-150	9.11995e-150
ARID5A	4170.34	-0.890343	0.0340524	-26.1462	1.08779e-150	9.12075e-150
TANC1	107.949	0.826152	0.0316034	26.1412	1.24005e-150	1.03868e-149
EIF3A	5275.68	0.430054	0.0164566	26.1327	1.55001e-150	1.29632e-149
NSDHL	243.255	0.646199	0.0247317	26.1284	1.73658e-150	1.45161e-149
PPM1G	1377.7	0.69554	0.0266248	26.1237	1.9592e-150	1.63603e-149
PDCD1	171.437	-2.85761	0.109403	-26.12	2.15865e-150	1.80166e-149
TOMM70A	940.207	0.519522	0.0199	26.1066	3.06511e-150	2.55691e-149
TSN	776.392	0.589733	0.0225969	26.098	3.84473e-150	3.20401e-149
BZW2	659.936	1.15639	0.0443125	26.0962	4.02551e-150	3.35296e-149
NEDD1	1731.63	-1.02106	0.0391275	-26.0957	4.07608e-150	3.39335e-149
DUSP12	139.587	0.593348	0.0227393	26.0935	4.32562e-150	3.59927e-149
CTDNEP1	1577.47	0.487289	0.0186754	26.0925	4.43575e-150	3.68903e-149
ATP5SL	298.251	0.70747	0.0271243	26.0825	5.75825e-150	4.78647e-149
CHSY1	1527.27	-0.716673	0.0274965	-26.0641	9.30063e-150	7.71929e-149
TRIAP1	202.433	1.07118	0.0411007	26.0622	9.77535e-150	8.10509e-149
TGIF2-C20orf24	2307.58	-0.827966	0.0317781	-26.0546	1.19314e-149	9.88777e-149
CCNA1	1598.96	-1.3203	0.0506817	-26.0508	1.31737e-149	1.09118e-148
COIL	221.497	0.547553	0.0210257	26.0421	1.65318e-149	1.36794e-148
GRPEL1	402.496	0.605749	0.0232604	26.0421	1.65444e-149	1.36829e-148
IFNAR1	1777.44	0.935736	0.035932	26.0419	1.66226e-149	1.37407e-148
TPP2	1829.72	0.428682	0.0164688	26.0299	2.27051e-149	1.87592e-148
SDHAP1	188.854	1.13076	0.0434417	26.0295	2.29887e-149	1.89839e-148
TAF1	805.574	0.598038	0.0229755	26.0294	2.30389e-149	1.90158e-148
PMPCA	327.41	0.870479	0.0334438	26.0281	2.37952e-149	1.96302e-148
ERI3	163.19	0.891891	0.0342688	26.0263	2.49295e-149	2.05555e-148
ASNSD1	450.277	0.851189	0.0327094	26.0228	2.73682e-149	2.25437e-148
PIP5K1C	1324.17	1.00312	0.0385521	26.0199	2.94766e-149	2.42682e-148
ILKAP	253.168	0.636445	0.0244645	26.0151	3.34429e-149	2.75199e-148
BMS1	595.871	0.758615	0.0292078	25.9731	9.98274e-149	8.18595e-148
MBNL1	14162.8	-0.679765	0.0261883	-25.9568	1.52435e-148	1.24936e-147
MAD2L1BP	569.439	-0.414909	0.0159913	-25.9459	2.02484e-148	1.6579e-147
LARS	1395.99	0.774481	0.0298546	25.9418	2.25117e-148	1.84137e-147
INTS12	457.245	-0.541705	0.0208865	-25.9356	2.64258e-148	2.16046e-147
CTNS	769.8	1.2928	0.0498652	25.9258	3.4067e-148	2.78378e-147
SNX6	5508.61	-0.739264	0.0285152	-25.9252	3.46153e-148	2.82718e-147
TULP3	437.477	1.08352	0.041796	25.924	3.57085e-148	2.91501e-147
UBASH3B	697.709	1.41685	0.0546815	25.911	5.00705e-148	4.08336e-147
SRPR	1643.62	0.57289	0.0221223	25.8965	7.29521e-148	5.94349e-147
ENGASE	345.217	1.1109	0.0429051	25.8921	8.18076e-148	6.66165e-147
RGS14	258.673	2.1028	0.0812635	25.8764	1.22906e-147	1.00033e-146
FLJ45340	629.15	-0.954711	0.0368955	-25.8761	1.2379e-147	1.00703e-146
MRPL21	174.119	0.76444	0.0295518	25.8678	1.53272e-147	1.24625e-146
GABPA	749.188	0.496915	0.019214	25.8621	1.77887e-147	1.44496e-146
LSM14B	461.019	0.49813	0.0192649	25.8569	2.03492e-147	1.65213e-146
CSNK2A2	922.284	0.316874	0.0122553	25.856	2.08267e-147	1.69006e-146
PAX3	44.1822	-4.88	0.188753	-25.8539	2.19668e-147	1.78169e-146
DCUN1D5	229.883	0.647377	0.025042	25.8516	2.33363e-147	1.89183e-146
RAB32	972.541	1.05045	0.0406423	25.8463	2.67865e-147	2.16939e-146
NSFL1C	504.093	0.605039	0.0234149	25.8399	3.15632e-147	2.55372e-146
CLCN3	1045.06	0.638779	0.0247322	25.8278	4.3167e-147	3.49084e-146
ARHGEF3	1877.43	-1.58651	0.0614287	-25.8269	4.41994e-147	3.57256e-146
PTPLAD2	1139.16	-1.16725	0.0452415	-25.8004	8.77599e-147	7.08301e-146
CPSF3L	468.934	0.583943	0.0226366	25.7964	9.72294e-147	7.83957e-146
PATL1	10437.9	-1.13729	0.0440895	-25.795	1.0079e-146	8.12269e-146
NRP1	8545.05	1.13059	0.0438377	25.7905	1.13416e-146	9.1357e-146
COPS7B	304.867	0.815818	0.0316425	25.7823	1.39935e-146	1.12663e-145
DEDD	79.5935	-2.54829	0.09887	-25.7742	1.72707e-146	1.38843e-145
KXD1	759.818	0.430729	0.016719	25.7628	2.31739e-146	1.86027e-145
NUS1	1352.96	0.635983	0.024707	25.7411	4.05852e-146	3.25476e-145
DUOXA1	364.122	1.57062	0.0610207	25.7392	4.25849e-146	3.41345e-145
CAPN2	7484.99	-0.772769	0.0300236	-25.7388	4.30766e-146	3.45118e-145
IKBKB	1034.64	0.46196	0.0179518	25.7334	4.94744e-146	3.95795e-145
EIF4EBP2	1446.86	0.578345	0.0224754	25.7323	5.08141e-146	4.06314e-145
ZFAND6	1069.69	0.315796	0.0122791	25.7181	7.3312e-146	5.85638e-145
C12orf23	370.316	-1.04834	0.0408026	-25.6929	1.40388e-145	1.12037e-144
RGL2	1040.8	1.04152	0.0405425	25.6896	1.52913e-145	1.21973e-144
ARFGAP1	664.902	0.469745	0.0182948	25.6765	2.14043e-145	1.70569e-144
UTP14A	303.694	0.707707	0.0275648	25.6743	2.26369e-145	1.80216e-144
HSPA4	2782.04	0.391243	0.0152448	25.6641	2.94639e-145	2.34453e-144
DVL3	932.633	0.382551	0.0149076	25.6615	3.14515e-145	2.50147e-144
ABI1	4785.69	-0.887056	0.0345723	-25.658	3.43876e-145	2.73366e-144
MFF	458.623	0.575817	0.0224491	25.6499	4.24036e-145	3.36438e-144
MRPL20	628.905	0.436504	0.0170248	25.6393	5.55881e-145	4.40406e-144
SLC25A29	196.054	1.72801	0.0673982	25.6388	5.6354e-145	4.46258e-144
AGO1	493.467	0.645917	0.0251961	25.6356	6.12482e-145	4.84547e-144
CHP1	1871.12	0.74247	0.0289695	25.6293	7.18515e-145	5.67883e-144
SNX27	1477.84	-0.695135	0.0271316	-25.6208	8.94026e-145	7.05918e-144
WDR37	825.478	0.586749	0.0229018	25.6202	9.08378e-145	7.16906e-144
BRI3BP	449.995	1.30759	0.051075	25.6014	1.47211e-144	1.16125e-143
NT5C2	3685.46	-0.681337	0.0266184	-25.5965	1.66938e-144	1.3156e-143
MTDH	3469.29	0.560563	0.0219107	25.5839	2.30354e-144	1.81449e-143
DYRK2	502.725	0.995239	0.0389497	25.5519	5.23002e-144	4.11375e-143
MRPL47	288.512	0.674519	0.0264024	25.5476	5.83328e-144	4.58605e-143
HSF1	649.008	0.478342	0.0187273	25.5425	6.64623e-144	5.22267e-143
POM121	817.057	0.678566	0.0265663	25.5424	6.67568e-144	5.2433e-143
C10orf76	1269.43	-0.348965	0.0136732	-25.5219	1.12791e-143	8.85471e-143
GIT2	1984	0.441824	0.0173181	25.5123	1.44104e-143	1.13022e-142
VPS26B	502.525	0.96392	0.0377884	25.5083	1.59402e-143	1.24841e-142
ARID4B	2813.7	-0.667057	0.0261516	-25.5073	1.63501e-143	1.2799e-142
GUCY1A3	257.144	-2.18036	0.0855582	-25.4839	2.97169e-143	2.32294e-142
TRMT10C	298.49	0.577628	0.0226722	25.4773	3.51525e-143	2.74391e-142
EFTUD2	2169.7	0.48996	0.0192345	25.4729	3.93366e-143	3.06904e-142
ASXL1	501.457	1.0553	0.0414344	25.4692	4.32719e-143	3.37447e-142
WDR43	476.834	0.789686	0.0310675	25.4184	1.58061e-142	1.22968e-141
TMEM9	168.548	1.28285	0.0504736	25.4163	1.66617e-142	1.29563e-141
PET112	230.055	0.892039	0.0350977	25.4159	1.68242e-142	1.30765e-141
ELP5	263.698	0.682298	0.0268528	25.4088	2.01518e-142	1.5648e-141
PTGS1	1806.58	1.18831	0.0467708	25.4071	2.10548e-142	1.63414e-141
BCAT2	213.085	0.862642	0.0339832	25.3844	3.75122e-142	2.9087e-141
RSPRY1	593.05	0.568079	0.0224226	25.3352	1.30992e-141	1.01379e-140
GRB2	8340.68	-0.488944	0.0193001	-25.3338	1.35569e-141	1.04823e-140
MAPKAPK5	368.796	0.714267	0.0281955	25.3327	1.3947e-141	1.07738e-140
AGRN	3716.68	-0.975702	0.0385278	-25.3246	1.71238e-141	1.32216e-140
FAM213B	234.878	1.2442	0.0491411	25.319	1.97548e-141	1.52386e-140
RALGPS2	221.416	2.12268	0.0838557	25.3135	2.26619e-141	1.74647e-140
FGD2	7896.68	-0.814846	0.0321939	-25.3106	2.44436e-141	1.88289e-140
UBL4A	380.393	0.972083	0.0384114	25.3071	2.66607e-141	2.05271e-140
COG4	683.629	0.560994	0.0222085	25.2603	8.72493e-141	6.68938e-140
RPS6KA1	2263.85	1.12213	0.0444265	25.2581	9.23457e-141	7.07681e-140
EIF3B	1313.37	0.811218	0.032123	25.2535	1.03709e-140	7.94388e-140
PSMD7	1627.16	0.320404	0.0126946	25.2393	1.48285e-140	1.1353e-139
TMEM150B	1375.64	-1.07377	0.0425654	-25.2263	2.06312e-140	1.57736e-139
PICK1	176.557	0.984434	0.0390431	25.214	2.81132e-140	2.1474e-139
ZNF672	581.23	0.531608	0.0210883	25.2087	3.21755e-140	2.45541e-139
TFEC	10745.4	-0.866304	0.0343833	-25.1955	4.49035e-140	3.42194e-139
TMEM184B	405.611	0.948539	0.0376578	25.1884	5.36688e-140	4.08801e-139
SNX8	3372.5	0.946206	0.0375912	25.1709	8.33745e-140	6.34777e-139
CTNNAL1	1099.56	1.38729	0.0551266	25.1655	9.55776e-140	7.27011e-139
TRIM38	2320.07	-0.893646	0.0355239	-25.1562	1.2089e-139	9.19119e-139
BLOC1S6	4301.66	1.35167	0.0537471	25.1488	1.45835e-139	1.10724e-138
TANK	3990.61	-0.958938	0.0381388	-25.1434	1.66924e-139	1.26677e-138
BCKDK	811.818	0.72133	0.0286972	25.1359	2.0169e-139	1.52989e-138
IER2	5353.62	-1.44381	0.0574553	-25.1292	2.38577e-139	1.80719e-138
HNRPDL	2018.46	0.669524	0.0266455	25.1271	2.51303e-139	1.90271e-138
IKBIP	100.771	1.03978	0.0414048	25.1125	3.63341e-139	2.74465e-138
OXSR1	1508.31	-0.403657	0.0160784	-25.1055	4.33071e-139	3.26686e-138
GNPDA1	1171.77	1.22566	0.0488217	25.1049	4.39723e-139	3.31552e-138
MXD4	299.38	1.43398	0.0571242	25.1029	4.62511e-139	3.48574e-138
TOR1A	884.442	-0.371945	0.0148215	-25.095	5.64228e-139	4.25038e-138
ECSIT	130.576	1.05793	0.0421712	25.0865	6.98165e-139	5.25692e-138
LARP7	1089.13	-0.423283	0.0168745	-25.0841	7.41176e-139	5.57822e-138
MOB1B	3758.31	-0.782498	0.0312019	-25.0786	8.5238e-139	6.41221e-138
ZMYM4	1575.88	-0.387577	0.0154558	-25.0765	8.96654e-139	6.74218e-138
VCL	3757.19	1.40548	0.0560859	25.0594	1.37905e-138	1.03552e-137
AKNA	1890.51	-1.10514	0.0441069	-25.0559	1.50646e-138	1.13068e-137
SNX5	1545.67	0.738636	0.0295011	25.0376	2.38286e-138	1.78518e-137
POMP	2178.71	-0.469002	0.0187342	-25.0346	2.5706e-138	1.92495e-137
MYO10	598.11	-1.95059	0.0779177	-25.0339	2.61201e-138	1.95507e-137
TTC9C	697.144	1.0454	0.041771	25.0268	3.1222e-138	2.33588e-137
HES6	79.9077	1.65172	0.0660048	25.0243	3.32771e-138	2.4885e-137
TOP1MT	174.522	1.25663	0.0502552	25.005	5.39731e-138	4.03065e-137
LOC728875	86.5297	-1.79406	0.0717845	-24.9923	7.40905e-138	5.52795e-137
ARRDC4	4213.44	1.23218	0.0493438	24.9714	1.25159e-137	9.32969e-137
BOLA2	821.773	0.698275	0.0279798	24.9564	1.82013e-137	1.35554e-136
MLST8	190.086	0.658364	0.0263829	24.9542	1.92238e-137	1.43104e-136
SIAH1	473.791	1.22535	0.0491403	24.9356	3.05743e-137	2.27496e-136
PPM1F	1013.8	1.26673	0.0508166	24.9274	3.75133e-137	2.78874e-136
FECH	885.331	-0.949996	0.0381128	-24.9259	3.8984e-137	2.89676e-136
HAGHL	42.3133	1.62275	0.0651168	24.9206	4.44511e-137	3.30151e-136
ZSWIM8	1087.12	0.651634	0.0261765	24.8939	8.67074e-137	6.43126e-136
GOPC	1353.06	-0.683755	0.0274694	-24.8916	9.18208e-137	6.80745e-136
SIRT6	201.812	0.601311	0.0241665	24.8821	1.16338e-136	8.62123e-136
ARPC1A	589.088	0.348105	0.0139925	24.8781	1.2856e-136	9.52263e-136
XPO6	4263.26	-0.55792	0.0224271	-24.8771	1.31789e-136	9.75741e-136
RABEPK	282.638	1.46212	0.0587797	24.8745	1.40379e-136	1.03887e-135
TMEM203	206.908	0.783012	0.0314865	24.8681	1.64595e-136	1.21698e-135
BTAF1	2839.2	-0.510918	0.0205481	-24.8645	1.80212e-136	1.33185e-135
LINC00667	235.221	1.10376	0.0443922	24.8639	1.8287e-136	1.35088e-135
TIMM17A	743.508	0.688024	0.0276783	24.8579	2.12415e-136	1.56843e-135
CDR2L	209.491	2.47702	0.099649	24.8574	2.14903e-136	1.58609e-135
ARL6IP1	4369.99	0.458595	0.0184502	24.8559	2.2336e-136	1.64776e-135
WDR59	282.466	1.1066	0.0445324	24.8492	2.63749e-136	1.94222e-135
FAM195A	120.279	1.41244	0.0568662	24.8379	3.4952e-136	2.57267e-135
FLI1	1599.17	-0.951417	0.0383166	-24.8304	4.20992e-136	3.09458e-135
XPC	696.508	1.00225	0.0403797	24.8207	5.35725e-136	3.93441e-135
CPT1A	2425.22	-0.893256	0.0359998	-24.8128	6.52855e-136	4.79033e-135
FYB	3170.47	-1.25491	0.0505804	-24.8103	6.94849e-136	5.09618e-135
KIAA1432	3188.38	-0.820929	0.0330997	-24.8017	8.59888e-136	6.30379e-135
CCDC101	205.74	-0.859864	0.034671	-24.8007	8.81641e-136	6.46037e-135
MRPS2	197.144	0.824748	0.033265	24.7933	1.05931e-135	7.75884e-135
AP2A2	3986.42	1.42141	0.0573347	24.7915	1.10739e-135	8.10732e-135
CBX5	967.912	1.10239	0.0444753	24.7867	1.24872e-135	9.13796e-135
PVR	685.53	1.56268	0.0631063	24.7626	2.26618e-135	1.65688e-134
C6orf203	101.409	0.778245	0.0314294	24.7617	2.32091e-135	1.69613e-134
NDUFA5	630.823	0.620483	0.0250671	24.7529	2.88572e-135	2.10609e-134
MKI67IP	396.301	0.748744	0.0302614	24.7426	3.72864e-135	2.72007e-134
DYSF	4128.74	-1.48582	0.0601219	-24.7135	7.66377e-135	5.57836e-134
POLRMT	271.684	0.865964	0.0350468	24.7088	8.60398e-135	6.25716e-134
B3GAT3	257.458	0.743149	0.0300884	24.6988	1.10115e-134	8.00088e-134
TRIM65	336.023	1.03223	0.0418044	24.6919	1.30596e-134	9.48483e-134
SMPD2	135.58	1.08012	0.0437455	24.6909	1.33843e-134	9.71637e-134
ENOPH1	553.347	0.596979	0.0241803	24.6887	1.41446e-134	1.02638e-133
TECPR2	281.034	0.467457	0.0189368	24.6851	1.54764e-134	1.12252e-133
SNX13	699.243	0.593002	0.024023	24.6848	1.55907e-134	1.13031e-133
PPP5C	240.725	1.30005	0.0526673	24.6841	1.58383e-134	1.14775e-133
TXNL1	916.471	0.466621	0.0189065	24.6805	1.73424e-134	1.25619e-133
XLOC_009295	430.946	-2.01601	0.0817087	-24.6732	2.07732e-134	1.50337e-133
2018-09-08	260.19	0.889179	0.0360809	24.644	4.26601e-134	3.08598e-133
PES1	443.283	0.887336	0.0360149	24.638	4.95062e-134	3.57964e-133
MAP1S	861.411	0.884297	0.0359066	24.6277	6.38114e-134	4.60995e-133
TOR2A	235.8	0.597353	0.0242557	24.6273	6.43676e-134	4.64807e-133
RUSC1-AS1	21.3985	-1.61526	0.0655898	-24.6266	6.54929e-134	4.72725e-133
RIPK2	5492.27	-1.24888	0.050763	-24.6022	1.19748e-133	8.63577e-133
DEAF1	211.093	0.9607	0.0390653	24.5921	1.533e-133	1.10505e-132
CREBL2	6061.17	1.33007	0.0540898	24.5901	1.61217e-133	1.1611e-132
MGRN1	1212.07	0.556807	0.0226609	24.5713	2.56119e-133	1.84217e-132
TMOD3	3712.86	-0.434003	0.017673	-24.5574	3.60903e-133	2.59243e-132
LMF2	857.457	-0.581178	0.0236677	-24.5558	3.75204e-133	2.69397e-132
CABLES2	85.1359	1.21948	0.0496743	24.5495	4.37342e-133	3.13875e-132
PIK3R6	228.127	1.45767	0.0593798	24.5482	4.51533e-133	3.23918e-132
UBE2G1	715.727	0.56436	0.0229919	24.5461	4.76348e-133	3.4157e-132
SMARCA4	1055.49	0.737907	0.0300862	24.5264	7.72129e-133	5.53179e-132
PLEKHM1	932.349	0.624726	0.0254796	24.5187	9.33297e-133	6.67769e-132
HERC2P9	140.099	0.982537	0.0400827	24.5128	1.07963e-132	7.71126e-132
PABPC1	23773.6	0.537031	0.0219082	24.5128	1.08014e-132	7.71151e-132
MIR5095	278.82	0.537371	0.0219275	24.5067	1.25333e-132	8.94021e-132
ALKBH6	54.309	0.906875	0.0370149	24.5003	1.46727e-132	1.04526e-131
WIPI2	967.267	0.487261	0.0198949	24.4917	1.81073e-132	1.28938e-131
SREBF1	1070.22	0.990372	0.0404587	24.4786	2.49647e-132	1.77613e-131
PLCL1	1105.77	-1.54706	0.0632551	-24.4575	4.18612e-132	2.97438e-131
LSM14A	1445.14	0.37306	0.0152556	24.454	4.56422e-132	3.24163e-131
SREK1IP1	366.632	0.610236	0.0249574	24.4511	4.89359e-132	3.47254e-131
HSP90AB1	14862.9	0.651849	0.0266634	24.4474	5.36663e-132	3.80657e-131
DEF8	929.054	0.861911	0.0352662	24.4402	6.4045e-132	4.54077e-131
FOXC1	674.572	-2.18556	0.0894348	-24.4375	6.83465e-132	4.84155e-131
AP3D1	2298.18	0.483175	0.0197751	24.4335	7.53595e-132	5.33604e-131
UVRAG	2456.55	-0.923866	0.0378166	-24.4302	8.17499e-132	5.78603e-131
PVRL2	4575.09	-0.674483	0.0276109	-24.4281	8.60072e-132	6.0821e-131
UBXN2B	424	0.769825	0.0315154	24.427	8.84103e-132	6.24934e-131
ARFGEF2	1886.59	0.538293	0.0220405	24.4228	9.78166e-132	6.91125e-131
DDX10	256.671	1.06528	0.0436196	24.4221	9.96179e-132	7.03549e-131
CXCL10	117303	-4.66489	0.191174	-24.4012	1.66068e-131	1.17234e-130
CCDC115	722.521	0.631149	0.0258677	24.3991	1.74982e-131	1.23474e-130
UFC1	914.848	0.496766	0.0203601	24.399	1.75154e-131	1.23543e-130
RAB11FIP3	173.694	0.977915	0.040092	24.3918	2.09168e-131	1.47407e-130
GIMAP8	926.113	-2.01627	0.0827036	-24.3795	2.8203e-131	1.98584e-130
RPS6KA3	1535	0.682435	0.0279966	24.3757	3.09863e-131	2.18088e-130
XLOC_001374	831.017	1.19957	0.0492227	24.3702	3.53767e-131	2.48882e-130
GAS2L3	615.921	1.37501	0.0564337	24.3651	4.00729e-131	2.81679e-130
INTS9	383.703	0.490543	0.0201381	24.3589	4.66543e-131	3.278e-130
UTP11L	242.143	0.787908	0.0323872	24.3278	9.97106e-131	6.99682e-130
MGAT4A	5204.2	-1.1235	0.0461899	-24.3234	1.10772e-130	7.76971e-130
TREML2	193.723	2.11801	0.0870829	24.3217	1.15432e-130	8.0931e-130
NOP14	730.077	0.744634	0.0306438	24.2997	1.97681e-130	1.38419e-129
CDK10	176.711	1.03177	0.0424627	24.2982	2.04672e-130	1.43253e-129
NUDCD3	506.19	0.651932	0.0268366	24.2927	2.34266e-130	1.63896e-129
SH3BP5	458.664	1.86775	0.0768938	24.29	2.49863e-130	1.74733e-129
HLA-G	35002.2	-0.798827	0.0329373	-24.253	6.15336e-130	4.29399e-129
TLR7	268.229	-2.80662	0.115799	-24.2371	9.04811e-130	6.30598e-129
LYST	3684.35	-1.0923	0.0450816	-24.2295	1.08813e-129	7.57073e-129
CERS6	5813.42	-0.933964	0.0385487	-24.2281	1.12413e-129	7.81789e-129
SAFB2	628.045	0.58275	0.0240622	24.2185	1.42127e-129	9.88017e-129
PINK1	298.532	1.02197	0.0422005	24.2169	1.47587e-129	1.02554e-128
ARMC8	1046.57	-0.531955	0.0219673	-24.2158	1.51684e-129	1.05356e-128
KLF11	1351.37	-0.645728	0.0266723	-24.2096	1.76101e-129	1.22212e-128
CECR1	14679.9	-0.897092	0.0370702	-24.1998	2.23421e-129	1.54921e-128
SDC2	4156.4	1.21991	0.0504144	24.1977	2.35475e-129	1.63209e-128
ARMCX1	736.991	-1.71923	0.0710792	-24.1876	3.00752e-129	2.08189e-128
JOSD1	1586.72	0.624758	0.0258303	24.187	3.04819e-129	2.10916e-128
RIN2	7241.91	-1.88874	0.0781083	-24.1811	3.51637e-129	2.43003e-128
SH2B1	329.329	0.71539	0.0295922	24.175	4.07971e-129	2.81696e-128
SRBD1	801.719	-0.774467	0.0320391	-24.1725	4.32798e-129	2.98712e-128
IFT46	76.893	1.01306	0.0419146	24.1696	4.64519e-129	3.20202e-128
TRIM36	961.055	-1.02226	0.0423082	-24.1621	5.56888e-129	3.83712e-128
RNF34	589.79	-0.459843	0.0190376	-24.1544	6.70517e-129	4.61618e-128
ADAP2	2949.92	-0.737191	0.0305243	-24.151	7.29545e-129	5.02045e-128
ELAVL1	817.791	0.59396	0.0246109	24.134	1.09892e-128	7.55916e-128
DNAJA3	276.785	0.901507	0.0373587	24.1311	1.17938e-128	8.10923e-128
ACTN2	601.951	-2.79662	0.116045	-24.0996	2.52646e-128	1.73424e-127
XPO7	1206.99	0.557276	0.0231289	24.0944	2.8643e-128	1.9645e-127
EEF2K	1339.02	0.803032	0.0333619	24.0703	5.1117e-128	3.50004e-127
FTSJ3	975.289	0.590952	0.0245585	24.063	6.10154e-128	4.17431e-127
PTPRC	17992.1	-0.557394	0.0231685	-24.0583	6.83919e-128	4.67701e-127
CSTF3	757.008	-0.560003	0.0232794	-24.0557	7.27355e-128	4.96991e-127
AIMP2	292.644	0.699669	0.0290978	24.0455	9.31273e-128	6.36059e-127
ODF3B	437.394	-1.53256	0.0637485	-24.0408	1.04193e-127	7.11339e-127
SIPA1L2	930.923	-1.41404	0.0588252	-24.0379	1.11671e-127	7.61759e-127
GFER	116.37	0.602041	0.0250465	24.0369	1.1447e-127	7.80526e-127
MRPL2	109.415	0.841915	0.0350261	24.0367	1.14863e-127	7.82881e-127
GALNT2	1783.49	-0.562134	0.0233925	-24.0305	1.3351e-127	9.09224e-127
USP38	665.596	0.46959	0.0195472	24.0233	1.58592e-127	1.07906e-126
FASTK	361.314	0.698988	0.0291106	24.0114	2.11204e-127	1.43594e-126
TMEM126A	236.288	0.517816	0.0215678	24.0087	2.25408e-127	1.53188e-126
TRIM44	2204.64	-0.409812	0.017072	-24.0049	2.47267e-127	1.67973e-126
RNF185	732.743	0.576371	0.024011	24.0045	2.49576e-127	1.69472e-126
SRD5A3-AS1	50.7062	-3.2692	0.13626	-23.9924	3.3387e-127	2.26523e-126
RNFT1	477.923	0.609756	0.0254259	23.9817	4.31478e-127	2.92506e-126
POLR2G	599.394	0.491277	0.0204881	23.9786	4.64715e-127	3.14907e-126
MFNG	1067.92	1.50913	0.0629539	23.972	5.44357e-127	3.68571e-126
UBA2	1008.17	0.647257	0.0270027	23.9701	5.69996e-127	3.85771e-126
ZFYVE26	4275.88	-0.547936	0.0228613	-23.9678	6.03128e-127	4.08026e-126
LTA4H	650.94	0.918871	0.0383412	23.9656	6.34985e-127	4.29401e-126
SMARCAD1	476.231	0.755042	0.0315074	23.964	6.60963e-127	4.46784e-126
PQBP1	559.333	0.401874	0.0167715	23.9618	6.96421e-127	4.70558e-126
DAPP1	4110.17	-1.15081	0.0480387	-23.9558	8.03884e-127	5.42945e-126
TCERG1	595.117	0.718137	0.029997	23.9403	1.16497e-126	7.86499e-126
NOC2L	475.365	0.939548	0.039291	23.9125	2.26805e-126	1.52807e-125
FOXQ1	443.143	2.21012	0.0924312	23.9109	2.358e-126	1.58737e-125
SERPINE1	924.254	2.91911	0.122086	23.9102	2.39799e-126	1.61362e-125
GTF3C1	959.894	0.423962	0.0177356	23.9046	2.74147e-126	1.84399e-125
STARD3	993.306	0.663612	0.0277668	23.8995	3.10169e-126	2.08458e-125
SLC2A3	1893.23	1.80214	0.0754125	23.8971	3.28631e-126	2.20776e-125
VPS13C	5131.5	-0.494289	0.020688	-23.8926	3.65965e-126	2.45755e-125
MESDC2	1730.97	-0.637159	0.0266897	-23.8729	5.85973e-126	3.93014e-125
NUMA1	2332.52	0.595682	0.024956	23.8693	6.38368e-126	4.27806e-125
LINC00493	230.755	0.448774	0.0188028	23.8674	6.67978e-126	4.47466e-125
C1orf35	76.1406	0.94131	0.0394412	23.8662	6.88311e-126	4.60898e-125
INPP5D	5691.96	-0.665393	0.0278902	-23.8576	8.45453e-126	5.65429e-125
PFDN6	268.794	0.643331	0.0269828	23.8422	1.21895e-125	8.14556e-125
QRICH1	1292.46	0.340998	0.0143151	23.8209	2.02895e-125	1.35472e-124
VPS11	1166.31	0.419574	0.0176165	23.8171	2.22215e-125	1.48191e-124
TADA2B	539.255	0.37013	0.0155457	23.8091	2.6883e-125	1.79205e-124
KAT7	1184.44	-0.630845	0.0265037	-23.8021	3.17531e-125	2.11498e-124
JAK1	5866.25	-0.402412	0.0169108	-23.7962	3.66035e-125	2.43706e-124
TSR3	166.883	0.695151	0.0292199	23.7904	4.20323e-125	2.79737e-124
PDCD6	836.378	0.606071	0.0254808	23.7854	4.73179e-125	3.14659e-124
DCTPP1	336.652	1.19204	0.0501426	23.773	6.3515e-125	4.21855e-124
PRKAG1	830.619	0.294703	0.0124008	23.7649	7.71528e-125	5.1202e-124
IFNGR1	2936.3	0.81328	0.0342406	23.7519	1.05005e-124	6.96574e-124
FAM168A	440.51	-1.29714	0.0546135	-23.7512	1.06769e-124	7.07991e-124
NBPF3	52.1653	1.09916	0.0462967	23.7417	1.33923e-124	8.87692e-124
TSPYL1	770.789	0.684171	0.028828	23.7328	1.65221e-124	1.09426e-123
ATF6	1883.03	0.351078	0.0147946	23.7302	1.76118e-124	1.16596e-123
CLEC4A	5952.36	1.13388	0.0477834	23.7296	1.78586e-124	1.18087e-123
SLAIN2	1046.13	0.329519	0.0138906	23.7224	2.11897e-124	1.4e-123
NPIP	571.052	0.965866	0.0407496	23.7024	3.40248e-124	2.24441e-123
COPB2	3177.8	0.185555	0.00782929	23.7001	3.59998e-124	2.37373e-123
PLXNA1	793.287	1.37788	0.0582088	23.6714	7.11384e-124	4.6775e-123
ZNF789	161.406	0.852816	0.0360296	23.6699	7.37131e-124	4.84485e-123
ZDHHC7	1347.02	0.654025	0.0276385	23.6636	8.56124e-124	5.62243e-123
CCRN4L	2060.64	1.35883	0.0574274	23.6618	8.92297e-124	5.85765e-123
FFAR2	146.409	-2.31251	0.097773	-23.6518	1.13062e-123	7.41921e-123
CECR5	297.094	0.791809	0.0334826	23.6484	1.22709e-123	8.04902e-123
WDR33	1118.62	0.405581	0.0171526	23.6455	1.31259e-123	8.6064e-123
PPIL4	464.694	0.510956	0.0216164	23.6374	1.59145e-123	1.04306e-122
POLR3H	96.4635	1.35155	0.0572086	23.625	2.13219e-123	1.39692e-122
GEMIN7	117.045	0.610127	0.0258302	23.6206	2.36495e-123	1.54879e-122
IFRD2	192.554	1.19179	0.0504939	23.6026	3.6233e-123	2.37193e-122
PELP1	665.29	1.01728	0.0431166	23.5938	4.46735e-123	2.9233e-122
GPD1L	597.651	2.02807	0.0859692	23.5907	4.80213e-123	3.13987e-122
MGST2	296.029	0.89025	0.0377382	23.5902	4.86316e-123	3.17851e-122
EIF4EBP1	167.433	1.27208	0.0539418	23.5824	5.83582e-123	3.81119e-122
LRFN4	164.784	1.13925	0.0483327	23.571	7.64127e-123	4.98035e-122
PSMD14	889.12	0.58637	0.0248785	23.5693	7.95324e-123	5.18162e-122
HECTD1	1755.73	0.425029	0.0180376	23.5635	9.13578e-123	5.94969e-122
ATP5H	1317.16	0.457929	0.0194353	23.5618	9.50521e-123	6.18783e-122
PPM1D	843.525	-0.870968	0.0369704	-23.5585	1.02674e-122	6.68135e-122
SCAF8	1061.87	0.348557	0.0148002	23.5509	1.22968e-122	7.99877e-122
TEX264	485.398	0.722714	0.0306896	23.5491	1.28106e-122	8.32968e-122
CBY1	44.9879	0.874836	0.0371694	23.5365	1.72739e-122	1.12229e-121
HSPE1	787.284	0.790111	0.0335731	23.534	1.8298e-122	1.18836e-121
MED1	1429.43	0.441437	0.0187599	23.5309	1.97175e-122	1.27903e-121
RAD23A	1215.66	0.491173	0.020876	23.5282	2.10142e-122	1.3626e-121
PSME4	1554.95	0.364447	0.0154969	23.5174	2.71041e-122	1.75609e-121
RPL17	192.88	1.08894	0.0463054	23.5164	2.76917e-122	1.79345e-121
PRPSAP1	251.028	0.655979	0.0279013	23.5107	3.17226e-122	2.0537e-121
ZNF518B	345.05	0.538868	0.0229217	23.5091	3.2956e-122	2.1327e-121
TMEM57	297.547	0.558801	0.023775	23.5037	3.73526e-122	2.41627e-121
NADSYN1	807.582	0.538299	0.0229036	23.5028	3.81521e-122	2.46702e-121
DHTKD1	769.147	0.681398	0.0290012	23.4955	4.53363e-122	2.92926e-121
RRP15	91.1536	1.28475	0.0546858	23.4933	4.78021e-122	3.08736e-121
HUS1	355.054	-0.472707	0.0201251	-23.4885	5.35e-122	3.45129e-121
RBM33	694.32	0.462605	0.0196957	23.4876	5.46029e-122	3.52105e-121
AGPS	1677.39	0.388715	0.0165528	23.4834	6.02721e-122	3.8851e-121
DPF2	634.231	0.355086	0.0151218	23.4817	6.26819e-122	4.03884e-121
TSC2	684.228	0.639509	0.0272417	23.4754	7.28227e-122	4.68673e-121
FTSJ2	402.358	0.741741	0.0316007	23.4723	7.82508e-122	5.03409e-121
TRMT1L	1321.48	-0.51814	0.0220793	-23.4673	8.81281e-122	5.6673e-121
MTM1	1023.45	-0.595865	0.0253957	-23.4632	9.69589e-122	6.2303e-121
HIATL1	3237.09	-0.406214	0.0173228	-23.4497	1.33184e-121	8.54799e-121
CCRL2	747.109	-1.5881	0.0677366	-23.4452	1.47887e-121	9.48794e-121
TXN2	802.71	0.621312	0.0265226	23.4258	2.33329e-121	1.49462e-120
PRPF4B	2032.19	-0.395698	0.0168963	-23.4192	2.72338e-121	1.74314e-120
GIGYF1	304.297	0.760917	0.0325104	23.4054	3.76746e-121	2.41047e-120
UFL1	674.013	0.44872	0.0191889	23.3843	6.17274e-121	3.94632e-120
YIPF3	854.214	0.318234	0.0136091	23.3839	6.23766e-121	3.98627e-120
GGCT	331.577	0.974134	0.0416771	23.3734	7.97335e-121	5.09151e-120
GGA3	866.172	0.394172	0.0168668	23.3698	8.67771e-121	5.53914e-120
POGZ	1570.94	-0.342769	0.0146679	-23.3688	8.88486e-121	5.66915e-120
BPTF	1437.22	0.46275	0.0198081	23.3617	1.04862e-120	6.68831e-120
ASPHD2	744.687	-1.30963	0.0560597	-23.3613	1.05756e-120	6.74272e-120
EMC1	773.063	0.642688	0.027515	23.3577	1.14978e-120	7.32784e-120
TIMM17B	227.249	0.566939	0.0242909	23.3395	1.76062e-120	1.12165e-119
KIFC3	570.223	1.12806	0.0483441	23.334	2.00262e-120	1.27483e-119
PCYOX1L	145.92	1.52317	0.0652847	23.3312	2.14041e-120	1.36202e-119
PSMB5	685.729	0.589402	0.0252672	23.3268	2.37271e-120	1.50925e-119
ANTXR2	4802.05	-0.876183	0.0375664	-23.3236	2.55682e-120	1.62573e-119
NDRG1	3867.18	-0.99896	0.0428341	-23.3216	2.67816e-120	1.70223e-119
FBXO33	514.703	0.428679	0.0183907	23.3096	3.54614e-120	2.25216e-119
SRGN	27759.8	-0.816208	0.035018	-23.3082	3.65921e-120	2.32307e-119
NUDC	680.477	0.602564	0.0258527	23.3076	3.7105e-120	2.35473e-119
DPAGT1	406.387	0.557608	0.0239282	23.3033	4.10002e-120	2.5989e-119
SMCO4	498.209	-0.963269	0.0413399	-23.3012	4.31349e-120	2.73316e-119
BC009467	45.1288	1.05545	0.0453072	23.2954	4.93101e-120	3.12323e-119
DDX21	1609.33	0.979773	0.0420666	23.291	5.47253e-120	3.46488e-119
RTF1	1786.95	-0.767366	0.0329504	-23.2885	5.80025e-120	3.67095e-119
NABP1	7336.62	-1.02881	0.0441869	-23.2831	6.57778e-120	4.15984e-119
TP53INP1	446.195	1.09871	0.0472237	23.2661	9.77496e-120	6.17461e-119
LMBR1L	1031.77	-0.921805	0.0396324	-23.2589	1.15653e-119	7.3027e-119
CNTLN	832.361	-0.809922	0.0348258	-23.2564	1.22667e-119	7.74263e-119
E2F4	876.811	0.438404	0.0188531	23.2537	1.30621e-119	8.24148e-119
HSBP1L1	32.0923	1.19302	0.051318	23.2476	1.5033e-119	9.4741e-119
FAM162A	441.527	0.880898	0.0378978	23.2441	1.63324e-119	1.0289e-118
TTC1	634.25	0.327633	0.0141044	23.2291	2.31205e-119	1.45598e-118
COMMD3-BMI1	823.663	0.414892	0.017861	23.2289	2.32743e-119	1.4651e-118
GRHPR	364.116	0.812072	0.0349601	23.2285	2.34472e-119	1.47542e-118
RCN2	208.873	1.09079	0.0469616	23.2272	2.42013e-119	1.52229e-118
RCE1	135.754	0.492048	0.0212014	23.2083	3.75824e-119	2.36125e-118
PPP2R5C	2503.82	-0.577617	0.0248922	-23.2047	4.08084e-119	2.56295e-118
NAF1	142.617	0.790854	0.0340826	23.204	4.14682e-119	2.60339e-118
SRP68	965.136	0.381133	0.0164317	23.195	5.11835e-119	3.2121e-118
PNISR	983.035	0.622886	0.0268709	23.1807	7.1297e-119	4.47264e-118
NUBP1	477.34	0.406368	0.0175349	23.1747	8.18691e-119	5.13192e-118
CCDC43	342.106	0.487695	0.0210768	23.1389	1.87847e-118	1.17482e-117
ARID4A	1157.84	0.561357	0.0242737	23.1261	2.52926e-118	1.58002e-117
MEA1	601.082	0.607203	0.0262641	23.1192	2.97173e-118	1.85501e-117
DHX29	826.892	0.450282	0.0194789	23.1164	3.16375e-118	1.97412e-117
NOA1	192.771	0.681846	0.029499	23.1142	3.33156e-118	2.07804e-117
PHRF1	636.946	0.629788	0.0272711	23.0936	5.37361e-118	3.34921e-117
HN1L	540.869	0.792942	0.0343421	23.0895	5.90542e-118	3.67927e-117
TAF13	499.106	0.523807	0.0226863	23.0891	5.95645e-118	3.70965e-117
C5orf24	557.701	0.587591	0.0254585	23.0804	7.2897e-118	4.53483e-117
SRCAP	2433.54	0.423098	0.0183353	23.0756	8.14639e-118	5.06584e-117
BUD31	611.124	0.367094	0.0159185	23.0609	1.14445e-117	7.10597e-117
KPNA6	1103.94	0.49454	0.0214484	23.0572	1.24422e-117	7.71961e-117
CCT7	1943.97	0.617056	0.0267785	23.043	1.73005e-117	1.07298e-116
COG2	369.308	0.581327	0.0252797	22.9958	5.1379e-117	3.17334e-116
HMOX1	14140	-1.48973	0.0647893	-22.9935	5.41302e-117	3.34201e-116
AGPAT1	1184.71	1.10438	0.048045	22.9863	6.39196e-117	3.94344e-116
DNAJB5	527.024	1.4053	0.0611386	22.9856	6.50069e-117	4.00901e-116
TRIM16	163.733	1.48971	0.0648407	22.9749	8.30766e-117	5.11567e-116
EBAG9	372.58	-0.488141	0.021249	-22.9724	8.79706e-117	5.415e-116
PRDM2	1197.92	0.440153	0.0191638	22.968	9.75013e-117	5.9994e-116
ATP6V1G1	2665.57	-0.421116	0.0183428	-22.9581	1.22228e-116	7.51804e-116
FAM208B	3891.87	-0.961894	0.041903	-22.9552	1.3062e-116	8.03124e-116
TTLL12	376.868	1.25431	0.0546683	22.944	1.68983e-116	1.03861e-115
MYSM1	647.44	0.563204	0.024547	22.9439	1.69384e-116	1.04069e-115
NHP2L1	664.73	0.839401	0.0365886	22.9416	1.78727e-116	1.09767e-115
C3orf58	614.317	-1.05535	0.0460022	-22.9413	1.80121e-116	1.10582e-115
TOR1AIP2	1255.68	0.516949	0.0225362	22.9387	1.91231e-116	1.17359e-115
TCF12	1738.02	0.388037	0.0169188	22.9352	2.07026e-116	1.26957e-115
RELA	2592.03	-0.514789	0.0224565	-22.9238	2.69123e-116	1.64915e-115
PDXK	4739.13	0.667056	0.0291262	22.9023	4.40803e-116	2.69815e-115
AIFM1	1163.45	0.893781	0.0390309	22.8993	4.72262e-116	2.88963e-115
SMIM14	841.25	-1.09852	0.0479908	-22.8902	5.81558e-116	3.5544e-115
ARL5B	4219.31	-1.48275	0.0648684	-22.8578	1.22274e-115	7.46486e-115
UBXN6	902.404	0.477749	0.0209169	22.8403	1.82454e-115	1.11182e-114
LEPROTL1	1236.3	-0.430154	0.0188441	-22.827	2.47208e-115	1.50529e-114
KDM4B	541.661	0.599593	0.026268	22.826	2.53019e-115	1.5401e-114
GOSR1	1100.94	0.360036	0.015774	22.8246	2.6112e-115	1.58882e-114
VASH1	1853.44	1.36009	0.0595891	22.8245	2.61895e-115	1.59294e-114
TCEAL8	415.861	0.524846	0.0229954	22.824	2.64893e-115	1.61058e-114
HSD17B4	2033.26	0.55268	0.0242182	22.8208	2.84761e-115	1.7301e-114
TTC39B	2102.19	-1.53112	0.0670969	-22.8196	2.93256e-115	1.78105e-114
TOR1AIP1	2255.92	-0.375714	0.016465	-22.8189	2.97856e-115	1.80832e-114
FAM131A	172.909	1.10829	0.0485751	22.8161	3.17438e-115	1.92649e-114
POP7	116.453	0.715047	0.0313411	22.815	3.25744e-115	1.97616e-114
MPHOSPH10	457.626	0.527833	0.0231371	22.8132	3.39053e-115	2.05614e-114
STIP1	1753.78	0.648935	0.0284498	22.8098	3.66473e-115	2.2216e-114
CD27-AS1	109.282	0.890274	0.0390489	22.7989	4.69832e-115	2.84397e-114
CDKN2D	99.7888	-1.30588	0.0573008	-22.7899	5.77377e-115	3.48981e-114
APIP	454.187	0.765949	0.0336118	22.7881	6.01342e-115	3.63332e-114
RSBN1	427.267	0.461107	0.0202383	22.7839	6.61688e-115	3.99646e-114
SENP3	232.52	0.68458	0.0300543	22.7781	7.55735e-115	4.5628e-114
CLNS1A	886.271	0.592981	0.0260365	22.7749	8.12383e-115	4.8994e-114
CFLAR	18461	-1.06377	0.0467081	-22.7749	8.14187e-115	4.90848e-114
PAIP2	1490.68	0.324665	0.0142592	22.7687	9.3688e-115	5.64401e-114
YBX3	1124.47	0.652364	0.0286542	22.7668	9.78636e-115	5.89339e-114
NOB1	236.792	0.908457	0.039941	22.745	1.6099e-114	9.68777e-114
OLFML3	362.374	-1.66632	0.0732643	-22.7439	1.64859e-114	9.91696e-114
XLOC_009269	34.3526	3.23639	0.142351	22.7353	2.0067e-114	1.20623e-113
RNF144B	4999.77	-0.794481	0.034945	-22.7352	2.01265e-114	1.20936e-113
KIF3B	300.317	0.913984	0.0402036	22.7339	2.07269e-114	1.24498e-113
MAGEF1	104.56	1.4615	0.0642877	22.7338	2.07565e-114	1.2463e-113
GPATCH4	124.844	1.23826	0.0545006	22.7202	2.83106e-114	1.69802e-113
MRPL24	214.324	0.806512	0.0355167	22.708	3.73511e-114	2.23861e-113
DCP2	3229.75	-0.547372	0.0241068	-22.7061	3.89705e-114	2.33481e-113
CD69	435.399	-2.08535	0.091888	-22.6945	5.07687e-114	3.03944e-113
ZC3H13	1463.4	0.378551	0.0166806	22.6941	5.11975e-114	3.064e-113
SUZ12P1	22.1661	1.23828	0.0545643	22.694	5.13389e-114	3.07134e-113
SYNJ2BP-COX16	826.784	0.362845	0.0159891	22.6933	5.21697e-114	3.11991e-113
EIF4G1	6477.82	0.389422	0.0171634	22.689	5.74919e-114	3.43693e-113
TCEB3	1130.39	0.35251	0.0155366	22.689	5.75905e-114	3.44157e-113
CDKL5	303.409	-0.723071	0.0318913	-22.673	8.27703e-114	4.9427e-113
MAPK1	3702.06	0.44893	0.0198029	22.6699	8.88577e-114	5.30428e-113
LETMD1	211.684	0.746004	0.0329126	22.6663	9.64633e-114	5.7541e-113
CD40	17319.6	-1.27434	0.056234	-22.6614	1.07742e-113	6.41519e-113
SRRM2	5827.89	0.57243	0.0252605	22.6611	1.08539e-113	6.46034e-113
PARVB	632.375	1.00198	0.0442273	22.6552	1.24088e-113	7.38046e-113
MFSD5	416.601	0.630884	0.027862	22.6432	1.62953e-113	9.68149e-113
DENND1C	482.101	0.910508	0.0402195	22.6384	1.81321e-113	1.07689e-112
EIF2A	1201.9	0.491526	0.0217121	22.6384	1.81513e-113	1.07764e-112
HGSNAT	1906.15	0.587247	0.0259703	22.6123	3.28341e-113	1.94583e-112
POLR1D	727.889	0.428654	0.0189608	22.6074	3.66622e-113	2.17112e-112
DPP9	2349.94	0.751304	0.0332356	22.6054	3.83533e-113	2.27045e-112
API5	1745.91	0.516181	0.0228352	22.6046	3.90179e-113	2.30896e-112
LUC7L2	1350.39	0.401317	0.0177566	22.601	4.23956e-113	2.50703e-112
MED13L	3090.58	-0.582347	0.0257667	-22.6007	4.26092e-113	2.51875e-112
ZNF786	68.3512	0.794678	0.035174	22.5928	5.10481e-113	3.01543e-112
UBB	9471.21	0.57337	0.025407	22.5674	9.06918e-113	5.34948e-112
KLHDC7B	218.477	-2.89529	0.128463	-22.5379	1.76516e-112	1.04006e-111
SLC22A16	96.2771	-2.04226	0.0906204	-22.5364	1.82593e-112	1.07548e-111
TUBB2A	888.552	-1.37628	0.0610895	-22.5289	2.16391e-112	1.27273e-111
CSE1L	1087.01	0.641067	0.0284583	22.5265	2.28195e-112	1.34167e-111
ABCC1	6131.39	-0.833634	0.0370118	-22.5235	2.44523e-112	1.43715e-111
ZHX1-C8ORF76	1089.37	-0.484321	0.0215044	-22.5219	2.53219e-112	1.48773e-111
GIMAP7	496.386	-1.8896	0.0839032	-22.5211	2.57747e-112	1.51379e-111
PTPLB	1342.95	1.27311	0.0565331	22.5198	2.65691e-112	1.55989e-111
FAF2	1005.79	0.344881	0.0153197	22.5123	3.14496e-112	1.84511e-111
2018-09-11	1446.05	0.682328	0.0303119	22.5102	3.29558e-112	1.93208e-111
BTF3	2856.39	0.514165	0.0228416	22.51	3.31414e-112	1.94227e-111
EMR1	304.466	-2.44847	0.108816	-22.501	4.05597e-112	2.37618e-111
EIF5B	1967.55	0.512848	0.0227939	22.4994	4.20838e-112	2.46459e-111
C11orf48	373.687	0.626998	0.0278726	22.4952	4.62759e-112	2.70912e-111
SLC25A5	3058.22	0.719147	0.0319727	22.4925	4.91242e-112	2.87484e-111
SURF4	2600.45	0.426923	0.0189911	22.4801	6.49296e-112	3.7971e-111
NCF2	10432.4	0.779061	0.0346632	22.4752	7.26046e-112	4.24442e-111
RAB7L1	1573.21	-1.0411	0.046361	-22.4563	1.11063e-111	6.48339e-111
M6PR	7662.13	0.480235	0.0213882	22.4532	1.18983e-111	6.94331e-111
PARL	656.518	0.54387	0.0242237	22.452	1.22227e-111	7.13006e-111
C12orf63	92.7705	-5.42659	0.241738	-22.4482	1.33256e-111	7.76791e-111
UQCC	312.936	0.729948	0.0325279	22.4407	1.57785e-111	9.18472e-111
STAT5A	6396.35	-0.654729	0.0291844	-22.4342	1.82553e-111	1.06227e-110
GTF2F1	1968.03	-0.389513	0.0173696	-22.4249	2.24981e-111	1.30823e-110
AAR2	572.388	0.293257	0.0130778	22.4242	2.28807e-111	1.33e-110
RBPJ	5215.52	1.06073	0.0473226	22.4149	2.81669e-111	1.6367e-110
ZFPL1	180.19	0.494301	0.0220526	22.4146	2.8347e-111	1.64657e-110
FAM118B	508.585	0.679042	0.030297	22.4129	2.94854e-111	1.7121e-110
DUSP22	922.17	0.621426	0.0277442	22.3984	4.08086e-111	2.36791e-110
CBWD3	745.951	-1.03235	0.0461077	-22.39	4.9291e-111	2.85909e-110
MRPL18	429.984	0.545406	0.0243604	22.389	5.03312e-111	2.91839e-110
ELOVL7	942.057	-1.32418	0.0591606	-22.3828	5.79133e-111	3.35684e-110
AK057188	643.171	1.46174	0.065317	22.3792	6.2797e-111	3.63735e-110
AKIP1	338.613	-0.596962	0.026677	-22.3774	6.5305e-111	3.78128e-110
WAS	740.699	0.678878	0.0303459	22.3713	7.48771e-111	4.33093e-110
MLH1	996.807	0.453336	0.02029	22.3428	1.41715e-110	8.18818e-110
ENY2	987.971	-0.326016	0.0145998	-22.3301	1.88542e-110	1.08823e-109
AAED1	984.938	-0.585235	0.0262431	-22.3005	3.65239e-110	2.10513e-109
B4GALT3	258.301	0.585727	0.0262688	22.2975	3.91111e-110	2.25346e-109
TAL1	405.361	1.93743	0.0869456	22.2832	5.37188e-110	3.09185e-109
DNAJC8	1402.46	0.417594	0.0187431	22.2798	5.79763e-110	3.33572e-109
STAG1	796.194	0.3853	0.0172984	22.2737	6.64516e-110	3.82067e-109
MCCC1	356.938	0.908447	0.0407889	22.2719	6.91349e-110	3.97217e-109
ATXN2L	2047.07	0.397462	0.0178502	22.2666	7.79674e-110	4.4765e-109
NOLC1	907.909	0.979812	0.0440159	22.2604	8.94389e-110	5.13334e-109
NSD1	1305.26	0.716214	0.0321908	22.249	1.15258e-109	6.60828e-109
ZNF664-FAM101A	646.726	0.871598	0.0391848	22.2432	1.31142e-109	7.51636e-109
STK25	685.103	0.422333	0.0189903	22.2394	1.42968e-109	8.19132e-109
MGC39372	112.37	-2.77836	0.124946	-22.2365	1.52428e-109	8.73028e-109
EHD1	567.433	1.64788	0.0741117	22.2351	1.57375e-109	9.01043e-109
SLC35C1	323.758	0.606446	0.0272761	22.2336	1.6246e-109	9.29509e-109
YWHAE	4017.74	0.280373	0.0126104	22.2334	1.63111e-109	9.32907e-109
FLAD1	285.646	0.389468	0.0175178	22.2327	1.65738e-109	9.47605e-109
PKD1P1	1116.91	0.867384	0.0390212	22.2286	1.81907e-109	1.03932e-108
EXOC3	587.761	0.517042	0.0232619	22.227	1.88309e-109	1.07553e-108
OSBP	1206.27	0.355816	0.0160103	22.2242	2.00602e-109	1.14494e-108
PRPF31	418.832	0.561233	0.0252609	22.2174	2.33033e-109	1.32911e-108
VAV1	434.027	1.44018	0.0648277	22.2155	2.43497e-109	1.38831e-108
POLR1E	112.745	1.28776	0.0579747	22.2124	2.60366e-109	1.48398e-108
TPM3	16294.2	-0.389822	0.0175539	-22.2071	2.93096e-109	1.66936e-108
ACTR6	468.96	-0.611489	0.027558	-22.1892	4.36912e-109	2.48762e-108
MYC	414.793	1.51065	0.0681077	22.1803	5.32065e-109	3.02623e-108
RPS19BP1	548.829	0.584404	0.026352	22.1769	5.74357e-109	3.26565e-108
MTG1	322.576	-0.727427	0.0328131	-22.1688	6.87542e-109	3.90648e-108
PSMG2	875.151	-0.286881	0.0129476	-22.1572	8.89431e-109	5.05007e-108
ALG2	856.232	0.650983	0.0293849	22.1537	9.61005e-109	5.45457e-108
HMBS	164.388	1.31985	0.0595791	22.1529	9.7907e-109	5.55326e-108
TFPT	192.557	0.556513	0.0251295	22.1458	1.14528e-108	6.49149e-108
PPP3CA	541.729	0.85397	0.0385669	22.1426	1.23063e-108	6.97289e-108
SRRT	1006.59	0.557875	0.0252069	22.1318	1.56228e-108	8.84288e-108
NOP16	146.102	1.03894	0.0469474	22.1298	1.63202e-108	9.2344e-108
SKAP2	1796.78	0.517253	0.0233737	22.1297	1.63587e-108	9.25301e-108
RCC1	334.342	1.40201	0.0633778	22.1216	1.96057e-108	1.10858e-107
DSE	5268.86	0.663876	0.0300312	22.1062	2.75391e-108	1.55555e-107
NCAPH2	822.948	-0.874913	0.0395861	-22.1015	3.05436e-108	1.72467e-107
MAPK14	1372.42	0.378918	0.017151	22.0931	3.6864e-108	2.08012e-107
BCCIP	354.271	0.694172	0.0314231	22.0911	3.84712e-108	2.17006e-107
ANKRD17	2324.63	0.297047	0.0134506	22.0843	4.4745e-108	2.52135e-107
UBE2E1	4802.93	-0.706559	0.0319959	-22.0828	4.62755e-108	2.60669e-107
H2AFY	3736.85	0.536737	0.0243061	22.0824	4.66351e-108	2.62605e-107
SAFB	1254.76	0.454135	0.0205658	22.082	4.706e-108	2.64907e-107
DENND2C	324.395	0.469953	0.0212859	22.0781	5.13135e-108	2.88751e-107
PFDN5	1323.38	0.37586	0.0170265	22.075	5.4933e-108	3.09012e-107
ZSWIM7	66.842	1.1692	0.0529779	22.0697	6.18565e-108	3.4772e-107
UBE2V1	1420.86	0.354293	0.0160566	22.0652	6.82166e-108	3.83341e-107
SCAP	500.436	0.755467	0.0342466	22.0596	7.72425e-108	4.33616e-107
HGS	1297.46	0.432012	0.0195976	22.0441	1.08703e-107	6.09806e-107
ETF1	2536.86	0.286976	0.0130211	22.0393	1.21032e-107	6.78507e-107
WBP5	87.0683	1.88745	0.085643	22.0386	1.22824e-107	6.8832e-107
ABCB10	756.227	-0.575485	0.0261187	-22.0335	1.37665e-107	7.70962e-107
SRSF11	2267.46	0.414221	0.0187998	22.0333	1.38278e-107	7.74131e-107
PLD2	510.049	0.867435	0.0393834	22.0254	1.64528e-107	9.20457e-107
ZNF770	632.3	0.50255	0.0228176	22.0247	1.6714e-107	9.3475e-107
CD93	1194.05	1.81546	0.0824359	22.0227	1.74485e-107	9.75164e-107
MRPL36	100.7	0.702417	0.0318968	22.0215	1.7911e-107	1.00067e-106
C12orf10	1003.67	0.418643	0.0190118	22.0202	1.84505e-107	1.03046e-106
HIPK1	2632.03	0.314516	0.0142862	22.0153	2.05531e-107	1.14672e-106
TIMMDC1	3144	-0.871992	0.0396131	-22.0127	2.17594e-107	1.21361e-106
TMEM55B	716.717	0.412504	0.0187444	22.0068	2.47845e-107	1.38186e-106
ZNF702P	396.486	-2.7053	0.122999	-21.9944	3.2546e-107	1.81276e-106
CUEDC1	916.912	-0.674099	0.030667	-21.9813	4.35087e-107	2.42089e-106
TNFRSF12A	43.8125	1.87975	0.0855357	21.9763	4.85978e-107	2.70314e-106
MRPL4	281.356	0.993583	0.0452178	21.9733	5.19006e-107	2.88587e-106
SUMF1	517.795	0.811965	0.0369613	21.968	5.82918e-107	3.24015e-106
ITCH	1662.4	0.301988	0.0137475	21.9668	5.98345e-107	3.32477e-106
UAP1L1	566.537	1.18562	0.0539811	21.9637	6.40993e-107	3.55933e-106
ZNF207	3977.84	-0.30213	0.0137566	-21.9626	6.56744e-107	3.64556e-106
PDHA1	843.761	0.725855	0.0330548	21.9592	7.07897e-107	3.92818e-106
TMEM43	1177.25	0.497747	0.0226676	21.9585	7.17569e-107	3.9805e-106
NDUFB9	473.361	0.68103	0.0310257	21.9505	8.56606e-107	4.74856e-106
SMG6	633.953	0.533299	0.024303	21.9437	9.94602e-107	5.5098e-106
STK4	6751.17	-0.90682	0.0413415	-21.9349	1.20783e-106	6.68652e-106
PMAIP1	16595.3	-1.72909	0.07886	-21.9261	1.46562e-106	8.10816e-106
PPHLN1	758.929	0.600616	0.0273931	21.9258	1.47279e-106	8.14505e-106
INO80E	165.07	0.801167	0.0365494	21.9201	1.67108e-106	9.23234e-106
UBXN4	2744.99	0.260165	0.0118708	21.9164	1.81374e-106	1.00171e-105
XLOC_004196	1453.03	2.30939	0.105381	21.9147	1.88243e-106	1.0393e-105
IMPDH2	471.029	1.43045	0.0652788	21.913	1.95264e-106	1.07733e-105
PRKAR2B	702.948	1.23237	0.056253	21.9077	2.19606e-106	1.21083e-105
RAB34	365.581	0.773906	0.0353317	21.904	2.38002e-106	1.31181e-105
RPL4	12352.3	0.651648	0.0297623	21.895	2.89588e-106	1.59561e-105
PSME3	1782.34	0.322615	0.0147369	21.8916	3.12582e-106	1.72172e-105
XLOC_010366	262.851	-1.49598	0.0683384	-21.8908	3.18161e-106	1.75186e-105
EIF3M	1305.36	0.495358	0.0226292	21.8902	3.22392e-106	1.77456e-105
STYXL1	395.941	0.64096	0.0292915	21.8821	3.84802e-106	2.11667e-105
ARHGAP9	817.296	1.23635	0.0565008	21.882	3.85697e-106	2.12088e-105
IDH3B	718.235	0.509158	0.0232686	21.8817	3.87705e-106	2.13121e-105
PSMC4	721.408	0.472643	0.0216028	21.8788	4.13476e-106	2.27211e-105
AK097472	417.386	0.815208	0.0372666	21.875	4.49501e-106	2.46924e-105
ERLIN1	367.5	0.974559	0.0445893	21.8563	6.7689e-106	3.71214e-105
SMG1	4907.5	-0.391308	0.0179063	-21.8531	7.25988e-106	3.98007e-105
SNX30	782.96	1.01482	0.0464542	21.8455	8.57464e-106	4.69771e-105
COPS6	449.498	0.473975	0.0217051	21.8371	1.03179e-105	5.65088e-105
MORF4L2	1562.56	0.49973	0.0228854	21.8362	1.05034e-105	5.75054e-105
UCHL5	476.432	0.608548	0.0278814	21.8263	1.30605e-105	7.14815e-105
NSMCE2	237.159	0.392458	0.0179823	21.8246	1.35417e-105	7.40904e-105
EMD	320.557	0.558661	0.0256041	21.8192	1.52438e-105	8.33755e-105
ZBTB7B	1065.69	0.73743	0.033804	21.8149	1.67612e-105	9.16441e-105
STK16	329.389	1.00313	0.0459865	21.8136	1.7236e-105	9.41772e-105
LMNB1	1113.31	-1.33097	0.0610256	-21.8101	1.86126e-105	1.01631e-104
USP16	967.591	0.402083	0.0184426	21.8019	2.22782e-105	1.21566e-104
C12orf29	80.6384	1.09643	0.0503122	21.7926	2.72582e-105	1.48641e-104
NOTCH2	6795.3	-0.928013	0.0425996	-21.7845	3.25252e-105	1.77304e-104
P4HA1	1937.58	0.607786	0.0279059	21.7798	3.60495e-105	1.9632e-104
COA3	227.967	0.482708	0.0221704	21.7726	4.21814e-105	2.29561e-104
C11orf73	249.699	0.551427	0.0253372	21.7635	5.14656e-105	2.79809e-104
[truncated: 6,195 more rows]

## Sheet: Flu vs IFNB1
#gene	baseMean	log2FoldChange	lfcSE	stat	pvalue	padj
AAED1	984.938	-0.956511	0.0197729	-48.3749	0	0
ABCE1	1204.56	-1.45523	0.0338059	-43.0465	0	0
ABCF1	1639.09	-0.784866	0.0151724	-51.7299	0	0
ABL1	834.782	1.04107	0.0253924	40.9994	0	0
ABL2	8462.83	-1.51247	0.0308783	-48.9816	0	0
ACO1	3717.52	-2.0307	0.0406437	-49.9636	0	0
ACOX3	1393.97	-3.13517	0.046824	-66.9563	0	0
ACSL3	5560.71	-1.75893	0.0327696	-53.6758	0	0
ACTN2	601.951	-5.84637	0.0718007	-81.4249	0	0
ADAD2	585.708	-5.01102	0.0826393	-60.6373	0	0
ADD1	3091.49	0.619816	0.0143141	43.3012	0	0
ADORA2B	142.983	-4.51985	0.0736003	-61.4108	0	0
ADORA3	548.439	3.41716	0.0776461	44.0093	0	0
ADPRM	194.233	-1.11061	0.0286194	-38.8062	0	0
AEBP2	940.067	-2.14992	0.0314183	-68.4287	0	0
AFAP1	3057.93	-6.29737	0.103255	-60.9887	0	0
AFF4	5204.57	-1.88307	0.0282177	-66.7335	0	0
AGGF1	760.437	0.541577	0.0137592	39.3612	0	0
AGO3	906.138	-2.15262	0.0356462	-60.3886	0	0
AGO4	830.463	0.987449	0.0168958	58.4433	0	0
AGPAT3	4068.7	0.501662	0.013089	38.3271	0	0
AHCYL2	1174.94	-1.5887	0.0357499	-44.4394	0	0
AHSA1	1928.15	-0.61398	0.0145772	-42.1192	0	0
AIM1	4703.7	-1.03063	0.0232532	-44.322	0	0
AK126539	98.9656	-3.96607	0.0582821	-68.0496	0	0
AK4	1021.36	-2.34422	0.0514802	-45.5364	0	0
AKAP11	2779.57	1.28465	0.0284212	45.2004	0	0
ALX1	62.2363	-3.88396	0.0873094	-44.4851	0	0
ANAPC10	206.461	-1.39402	0.0258432	-53.9413	0	0
ANGPT2	112.019	-4.94808	0.0998205	-49.5698	0	0
ANGPTL4	259.615	-4.11178	0.071787	-57.2775	0	0
ANKLE2	1563.36	-1.08052	0.0262049	-41.2336	0	0
ANKRD1	198.156	-6.99737	0.127864	-54.7252	0	0
ANKRD28	689.373	-4.10461	0.0657164	-62.4594	0	0
ANKRD33B	1772.14	-2.96261	0.0682387	-43.4154	0	0
ANKRD44	1892.97	0.829234	0.0209048	39.6671	0	0
AP2A2	3986.42	1.71718	0.0437776	39.225	0	0
APMAP	2625.08	1.14585	0.0242295	47.2914	0	0
APPL1	2580.05	0.787689	0.0159829	49.2832	0	0
ARAP2	7574.77	-2.37212	0.0362191	-65.4936	0	0
ARC	84.5838	-7.62601	0.119444	-63.8456	0	0
ARF4	2246.56	-0.848094	0.0147619	-57.4514	0	0
ARHGAP30	3829.9	0.667296	0.0170092	39.2316	0	0
ARID4B	2813.7	-1.33687	0.0198048	-67.5021	0	0
ARID5A	4170.34	-2.03988	0.0258147	-79.0202	0	0
ARID5B	2124.74	-3.90882	0.0678821	-57.5826	0	0
ARIH1	1704.72	-0.712295	0.0170517	-41.7726	0	0
ARL4A	903.303	-4.13955	0.0600997	-68.878	0	0
ARL5B	4219.31	-2.73344	0.0492623	-55.4875	0	0
ARL8B	5440.61	-0.902709	0.0218955	-41.2282	0	0
ARRDC3	2994.41	-2.70974	0.0382918	-70.7654	0	0
ARRDC4	4213.44	-1.45149	0.0376186	-38.5844	0	0
ASPHD2	744.687	-1.87709	0.0421303	-44.5543	0	0
ASTL	143.451	-7.73882	0.0970568	-79.735	0	0
ATF2	1571.94	-0.617532	0.0136728	-45.165	0	0
ATF3	20002.1	-3.91433	0.0393924	-99.3675	0	0
ATF4	4015.47	-0.888867	0.02299	-38.6632	0	0
ATG4C	389.457	1.64432	0.0329849	49.8508	0	0
ATXN7L1	1559.01	-1.5766	0.0296043	-53.2558	0	0
AX747750	588.632	-4.53507	0.0874074	-51.8842	0	0
AZIN1	5770.39	-1.5242	0.0233218	-65.355	0	0
B4GALT5	4283.8	-2.18526	0.0324331	-67.3776	0	0
BAG3	305.425	-1.24832	0.0325936	-38.2994	0	0
BAIAP2-AS1	223.209	1.81701	0.0473798	38.35	0	0
BAMBI	715.29	-6.48759	0.0808811	-80.2115	0	0
BANK1	687.801	-3.00909	0.0541127	-55.6078	0	0
BBC3	2028.2	-5.23951	0.049044	-106.833	0	0
BC017818	463.594	-2.05379	0.0499408	-41.1245	0	0
BC058012	299.084	-10.5454	0.154326	-68.3317	0	0
BCAR3	709.599	-1.57867	0.0398002	-39.6649	0	0
BCL10	1157.17	-1.50513	0.0248796	-60.4965	0	0
BCL2A1	2839.32	-6.71922	0.0928878	-72.3369	0	0
BCL7B	509.908	-0.61749	0.0151575	-40.7382	0	0
BHLHE40	3336.79	-1.88482	0.0443101	-42.5371	0	0
BIVM-ERCC5	877.732	0.677062	0.0157674	42.9405	0	0
BLCAP	722.79	0.725141	0.0161348	44.9426	0	0
BLZF1	4595.67	-1.3912	0.0260102	-53.4866	0	0
BMP2	353.894	-6.7758	0.108065	-62.7014	0	0
BNIP3	528.138	-2.06876	0.0435841	-47.4659	0	0
BOC	305.924	-5.09975	0.060854	-83.803	0	0
BRD2	6861.03	-1.0314	0.0160793	-64.1445	0	0
BRD4	1354.62	-0.930793	0.015766	-59.0379	0	0
BTG1	4358.43	-2.80261	0.0581751	-48.1754	0	0
BTG2	4420.11	-3.03549	0.0442985	-68.5235	0	0
BTG3	552.239	-1.58394	0.0361847	-43.7738	0	0
BTN2A1	1193.1	-0.868961	0.0180082	-48.2536	0	0
BUD31	611.124	-0.490281	0.0123393	-39.7332	0	0
C10orf54	1230.38	2.06798	0.0510479	40.5107	0	0
C11orf68	451.298	0.779702	0.0181722	42.9062	0	0
C12orf57	410.012	-3.64954	0.0510011	-71.5581	0	0
C12orf63	92.7705	-3.92632	0.0690528	-56.8596	0	0
C16orf87	193.935	-1.07184	0.0255142	-42.0096	0	0
C17orf58	1411.49	-3.32503	0.0777059	-42.7899	0	0
C18orf25	757.458	-0.504592	0.0127992	-39.4238	0	0
C21orf91	2914.28	-2.00508	0.0341118	-58.7796	0	0
C3orf38	2177.22	-1.04262	0.0180705	-57.6975	0	0
C6orf141	103.451	-4.43059	0.0659815	-67.149	0	0
C6orf89	1653.33	0.564477	0.0129172	43.6995	0	0
C7orf60	707.787	-1.29969	0.0285953	-45.4513	0	0
C8orf44-SGK3	2378.34	-1.04213	0.0275188	-37.8697	0	0
CA8	42.0759	-4.22448	0.0908165	-46.5167	0	0
CAHM	1646.13	-4.20375	0.0515234	-81.5892	0	0
CBWD2	805.991	-1.37804	0.0286563	-48.0885	0	0
CBWD3	745.951	-1.68375	0.0346426	-48.6036	0	0
CBWD6	260.864	-1.49453	0.0356977	-41.8662	0	0
CCBL2	1654.42	-0.855317	0.0217167	-39.3853	0	0
CCDC117	2226.56	-2.40498	0.0303491	-79.2437	0	0
CCDC140	99.094	-6.33222	0.112778	-56.1476	0	0
CCDC28A	410.498	0.928703	0.0232687	39.9121	0	0
CCDC59	226.923	-0.804915	0.0181212	-44.4185	0	0
CCDC6	3707.1	-1.29665	0.0265417	-48.8534	0	0
CCDC83	273.633	-5.23307	0.0642618	-81.4336	0	0
CCL20	2972.28	-9.35138	0.151203	-61.8464	0	0
CCL3	14126.5	-4.88306	0.0791543	-61.6904	0	0
CCL4	30706.1	-5.43722	0.0955669	-56.8944	0	0
CCL4L2	16503.2	-5.99957	0.114512	-52.3927	0	0
CCL5	33280.2	-4.75951	0.0962455	-49.4518	0	0
CCNK	1496.04	-0.908586	0.0162196	-56.0177	0	0
CCNT2	1207.24	-1.0499	0.0196425	-53.4502	0	0
CCRL2	747.109	-2.20363	0.0508695	-43.3192	0	0
CCRN4L	2060.64	-6.04243	0.0437277	-138.183	0	0
CCT6P1	569.137	-4.29872	0.0435752	-98.6507	0	0
CCT6P3	179.13	-2.88882	0.0453574	-63.6901	0	0
CD274	33154.3	-1.96941	0.0324252	-60.7371	0	0
CD40	17319.6	-1.81931	0.0428198	-42.4877	0	0
CD58	1674.56	-1.3968	0.032301	-43.2434	0	0
CDC16	759.097	0.621958	0.015973	38.938	0	0
CDC42EP3	3145.77	-4.94508	0.0483583	-102.259	0	0
CDK16	651.613	-0.73895	0.0195495	-37.7989	0	0
CDK7	313.705	-0.874508	0.0207942	-42.0554	0	0
CDKN2C	219.243	-2.78652	0.0554756	-50.2296	0	0
CENPB	756.453	0.703744	0.0182273	38.6094	0	0
CFLAR	18461	-1.62765	0.0355627	-45.7684	0	0
CH25H	1473.53	-4.18832	0.101046	-41.4496	0	0
CHD1	1371.77	-0.70918	0.0185982	-38.1317	0	0
CHD2	3289.63	-1.76363	0.0238834	-73.8434	0	0
CHEK2	692.841	-3.31293	0.0502257	-65.9609	0	0
CHMP4B	3282.04	-0.728824	0.0185284	-39.3356	0	0
CHORDC1	990.888	-1.05755	0.0210083	-50.3397	0	0
CHPF2	784.087	0.670685	0.0169531	39.5611	0	0
CITED2	13949.8	-2.57805	0.0422706	-60.9891	0	0
CLCF1	329.655	-6.94225	0.0936699	-74.1139	0	0
CLINT1	1919.83	-0.76986	0.0184914	-41.6333	0	0
CLK3	555.239	-0.648822	0.0160693	-40.3765	0	0
CNBP	5487.26	1.21419	0.0247692	49.0204	0	0
CNOT4	753.403	-0.679562	0.0134644	-50.471	0	0
CNPPD1	2902.65	0.729831	0.0194294	37.5632	0	0
COG8	212.887	0.780218	0.0205382	37.9886	0	0
COQ10B	1143.4	-1.10277	0.0174087	-63.3456	0	0
CORO7-PAM16	1934.65	0.822926	0.0206182	39.9127	0	0
CPEB2	3149.36	-1.64108	0.0318026	-51.6021	0	0
CPEB4	3171.71	-1.73223	0.0294039	-58.9116	0	0
CPT2	935.354	0.634351	0.0161517	39.2746	0	0
CREB3	909.125	-0.68482	0.0171615	-39.9045	0	0
CREBBP	2500.22	-0.662503	0.0158152	-41.8903	0	0
CSAG3	75.3192	-2.41367	0.0574654	-42.0022	0	0
CSNK1A1	3547.67	-0.411158	0.00977191	-42.0754	0	0
CSRNP1	7386.79	-3.09587	0.0329324	-94.0068	0	0
CSRNP2	521.904	-1.42176	0.0359291	-39.5713	0	0
CXCL1	8504.14	-5.70384	0.0886329	-64.3536	0	0
CXCL11	39262.8	-3.53515	0.0864711	-40.8825	0	0
CXCL2	3686.34	-6.44337	0.0858412	-75.0615	0	0
CXCL3	5312.89	-7.00502	0.0980058	-71.4756	0	0
CYB561	444.543	1.7115	0.0375467	45.5833	0	0
CYLD	5694.05	-0.972632	0.0175468	-55.4306	0	0
CYR61	81.5114	-8.71626	0.171739	-50.7528	0	0
DAPP1	4110.17	-1.40052	0.0365255	-38.3436	0	0
DBP	77.9662	3.82948	0.075755	50.5508	0	0
DCP1A	2549.26	-1.11829	0.0164538	-67.9651	0	0
DDIT3	203.683	-1.80384	0.0338857	-53.233	0	0
DDX10	256.671	-1.2718	0.0335224	-37.9389	0	0
DENND4A	1947.04	-2.46214	0.0373933	-65.8446	0	0
DENND5A	8498.43	-1.07201	0.0265131	-40.4332	0	0
DEPDC7	999.888	-6.98173	0.0693313	-100.701	0	0
DERA	572.526	0.813153	0.0150954	53.8676	0	0
DGCR2	604.387	0.889442	0.0224295	39.6551	0	0
DICER1	4678.79	-2.1666	0.0376541	-57.5397	0	0
DIRC2	1648.84	1.31716	0.0316102	41.6687	0	0
DL490867	134.92	-4.83966	0.0756727	-63.9552	0	0
DLC1	260.77	-3.44863	0.0690712	-49.9287	0	0
DMRTA2	270.559	-10.8316	0.167669	-64.6011	0	0
DNAJA2	2169.47	-1.43776	0.0298524	-48.1622	0	0
DNAJB1	2263.02	-1.62846	0.0308538	-52.7799	0	0
DNAJB4	7007.8	-4.78355	0.0390551	-122.482	0	0
DNAJB5	527.024	-3.93272	0.0466551	-84.2934	0	0
DNAJB6	4251.74	-0.86367	0.0202713	-42.6056	0	0
DNAJC2	567.955	-0.741437	0.0186906	-39.6691	0	0
DNAJC5	4139.8	0.540569	0.0134126	40.3031	0	0
DOK3	460.612	2.26232	0.0544548	41.5449	0	0
DUSP1	2393.54	-3.47329	0.0474597	-73.184	0	0
DUSP10	430.45	-4.01373	0.0696002	-57.6684	0	0
DUSP16	1142.76	-2.25287	0.040031	-56.278	0	0
DUSP2	4735.6	-6.49686	0.0579595	-112.093	0	0
DUSP5	9086.45	-1.69207	0.0411938	-41.0758	0	0
DUSP6	2010.02	-4.2008	0.0805278	-52.1658	0	0
EAF1	1055.19	-1.42279	0.0293895	-48.4113	0	0
EAF2	167.013	-2.34807	0.0488553	-48.0617	0	0
EDARADD	184.665	-2.78561	0.0711085	-39.1741	0	0
EDN1	241.354	-7.08582	0.11098	-63.848	0	0
EED	770.445	-0.985612	0.0232833	-42.3313	0	0
EGR1	7597.62	-8.6194	0.0701787	-122.821	0	0
EGR3	1752.24	-7.04857	0.0832809	-84.636	0	0
EGR4	461.913	-7.42336	0.0778358	-95.3721	0	0
EHD1	567.433	-2.22007	0.0566176	-39.2116	0	0
EIF1	6828.59	-0.781412	0.0184247	-42.4111	0	0
EIF2AK3	495.479	-1.79893	0.0346791	-51.8735	0	0
EIF2AK4	1063.33	1.12318	0.028451	39.4776	0	0
EIF2S2	2121.24	-0.597396	0.0153952	-38.804	0	0
EIF3J	865.854	-0.758123	0.0197409	-38.4037	0	0
EIF5	4595.8	-0.977862	0.0164191	-59.5563	0	0
ELF1	7961.7	-0.931194	0.0194433	-47.8928	0	0
ELL2	1833.68	-1.64015	0.0357315	-45.9021	0	0
ELOVL5	2899.32	-1.49417	0.0237578	-62.8919	0	0
ELOVL7	942.057	-2.0171	0.0445991	-45.2274	0	0
EPB41L4A-AS1	71.6882	-1.56033	0.0370209	-42.1474	0	0
EPC1	847.349	-0.946566	0.0190977	-49.5644	0	0
EPC2	837.194	-1.07336	0.0211575	-50.7318	0	0
EREG	2101.75	-2.23828	0.0543662	-41.1705	0	0
ERICH1	1841.43	-2.65523	0.0332521	-79.8517	0	0
ERN1	1483.97	-2.03903	0.0313619	-65.0164	0	0
ERRFI1	431.919	-2.95819	0.0582819	-50.7565	0	0
ESF1	458.964	-1.53897	0.0308979	-49.8081	0	0
ESYT2	2463.51	-1.4677	0.0303527	-48.3551	0	0
ETS2	4711.03	-4.23456	0.0699185	-60.5642	0	0
ETV6	506.036	-2.65272	0.0618363	-42.8991	0	0
EWSR1	4506.13	-0.455766	0.0105021	-43.3976	0	0
EXOSC8	270.629	-1.27158	0.0314133	-40.479	0	0
EXT1	1805.79	-3.46588	0.0418427	-82.8312	0	0
EXTL3	1087.68	0.642808	0.0170756	37.6448	0	0
EZH2	2934.81	-3.71588	0.0452914	-82.0438	0	0
F3	550.472	-3.27878	0.0573076	-57.2136	0	0
FAM107B	1392.04	-2.11055	0.054252	-38.9027	0	0
FAM133B	364.896	-0.846763	0.020479	-41.3479	0	0
FAM134A	1765.1	1.09747	0.0158072	69.4288	0	0
FAM208A	1837.5	0.689946	0.0176134	39.1717	0	0
FAM208B	3891.87	-1.94274	0.0318147	-61.0644	0	0
FAM43A	1038.85	-5.66692	0.0682911	-82.9819	0	0
FAM53C	1779.65	-1.50162	0.0237364	-63.2622	0	0
FAM57A	197.703	-3.79819	0.0569021	-66.7496	0	0
FAM65B	2308.58	-3.18111	0.051789	-61.4244	0	0
FAM76B	593.692	-0.712795	0.0184356	-38.664	0	0
FAM78A	1004.48	1.63389	0.0332032	49.209	0	0
FBXO34	1005.57	-0.72263	0.0180257	-40.0889	0	0
FBXO42	664.472	-0.60308	0.0137834	-43.7539	0	0
FDX1	490.506	-1.65625	0.0320787	-51.631	0	0
FECH	885.331	1.16494	0.0291187	40.0064	0	0
FEM1C	2196.14	-1.56995	0.0274188	-57.2582	0	0
FES	1136.8	2.49759	0.0495317	50.4242	0	0
FGD3	717.776	1.55416	0.034107	45.5672	0	0
FILIP1L	1283.63	-3.45035	0.0555578	-62.1037	0	0
FLI1	1599.17	1.70967	0.0292982	58.3541	0	0
FLOT1	5213.31	-1.47895	0.0393684	-37.5669	0	0
FNBP4	2585.31	-2.72308	0.0296813	-91.7441	0	0
FNDC3A	4845.71	-1.79214	0.0296086	-60.5276	0	0
FNDC3B	5626.68	-1.82723	0.0372514	-49.0513	0	0
FOS	1445.1	-6.32673	0.0988296	-64.0165	0	0
FOSB	233.203	-7.92156	0.0854538	-92.6999	0	0
FOSL1	471.444	-3.03887	0.070819	-42.9104	0	0
FOXC1	674.572	-5.30661	0.0599119	-88.5735	0	0
FZD2	940.411	1.70907	0.0367092	46.5569	0	0
FZD4	1255.99	-7.87117	0.065885	-119.468	0	0
G6PC3	496.289	0.787807	0.019673	40.0451	0	0
GABPB1	619.466	-1.05584	0.0200314	-52.7092	0	0
GADD45A	3453.91	-3.86585	0.0627975	-61.5606	0	0
GADD45B	3741.91	-2.79106	0.0435576	-64.0775	0	0
GALNT3	477.172	-1.7596	0.0435495	-40.4047	0	0
GBP2	4902.76	-1.32487	0.0296599	-44.6689	0	0
GBP5	14615.2	-2.10936	0.0414925	-50.8372	0	0
GCLC	3647.01	-1.94101	0.0388228	-49.9965	0	0
GDE1	1273.17	0.85177	0.0225197	37.8233	0	0
GEM	220.985	-5.78824	0.100572	-57.5532	0	0
GGA2	1475.94	1.3029	0.0319745	40.7482	0	0
GIMAP2	1372.46	1.09297	0.0284805	38.3762	0	0
GLCCI1	455.272	-3.77731	0.0481197	-78.4982	0	0
GLT8D1	293.01	0.956875	0.019559	48.9225	0	0
GNA13	11729.2	-1.76312	0.0261409	-67.4466	0	0
GOLPH3	2774.87	-0.923776	0.0197423	-46.7917	0	0
GOSR1	1100.94	-0.533393	0.0121276	-43.9818	0	0
GPBP1	4622.87	-1.01952	0.0186176	-54.7611	0	0
GPD2	5187.8	-0.890336	0.0224681	-39.6267	0	0
GPR132	1299.03	-2.16643	0.0447608	-48.4001	0	0
GRAMD1A	2335.99	-2.44829	0.0554328	-44.1668	0	0
GRASP	143.417	-3.53003	0.0827982	-42.6341	0	0
GRB10	958.632	-2.48251	0.0493276	-50.327	0	0
GREB1L	135.891	-6.19005	0.0801806	-77.2014	0	0
GTF2A1	1469.58	-1.13962	0.0281973	-40.4159	0	0
GTF3C2	795.03	0.641653	0.016884	38.0036	0	0
GZF1	797.465	1.05148	0.0266721	39.4225	0	0
HARS	1842.61	-2.25272	0.0375697	-59.9612	0	0
HBEGF	689.027	-4.42034	0.0896096	-49.3289	0	0
HDAC3	858.291	0.743348	0.0188469	39.4413	0	0
HECTD1	1755.73	0.536273	0.0139319	38.4923	0	0
HERPUD2	1573.27	0.617688	0.0142933	43.2153	0	0
HES4	691.957	-3.15016	0.0592702	-53.1492	0	0
HIAT1	8533.66	-2.89788	0.0313382	-92.4714	0	0
HIPK3	5367.73	-1.19702	0.0226455	-52.8591	0	0
HIST2H4A	640.737	-1.9564	0.03375	-57.9675	0	0
HIVEP1	1103.18	-1.56073	0.0386121	-40.4208	0	0
HIVEP2	2056.93	-2.19239	0.0358494	-61.1555	0	0
HLA-DMB	7445.32	0.982287	0.0253149	38.8027	0	0
HLA-DOB	244.031	-3.13011	0.0714894	-43.7842	0	0
HMGCL	545.572	0.739198	0.017812	41.5001	0	0
HMOX1	14140	2.49114	0.0493692	50.4594	0	0
HNRNPA2B1	17119.7	-0.738179	0.0147091	-50.1851	0	0
HNRNPC	9485.11	-1.16015	0.0187318	-61.935	0	0
HNRNPU	8665.45	-0.657006	0.0154003	-42.6619	0	0
HNRPLL	1751.77	-1.60857	0.0269979	-59.5813	0	0
HRH2	2318.34	-1.95726	0.0410504	-47.6795	0	0
HS3ST3B1	1822.56	-5.63769	0.0587524	-95.9566	0	0
HSCB	212.038	-2.00717	0.0300992	-66.685	0	0
HYAL2	349.573	1.05161	0.023769	44.2429	0	0
ICAM1	18856.3	-2.77066	0.0630242	-43.9618	0	0
IDO2	89.1143	-4.76862	0.0955661	-49.8987	0	0
IER2	5353.62	-4.19321	0.0433808	-96.6605	0	0
IER5	221.471	-3.23042	0.0573886	-56.2903	0	0
IFFO1	597.474	1.22359	0.0256645	47.6764	0	0
IFFO2	868.94	-2.35451	0.0426118	-55.255	0	0
IFIH1	37663.6	-1.68928	0.0330237	-51.1534	0	0
IFIT5	4234.76	-1.31453	0.0320096	-41.0667	0	0
IFNA13	4625.75	-10.9308	0.199485	-54.7954	0	0
IFNA14	1573.28	-10.7879	0.173191	-62.289	0	0
IFNA2	9430.5	-10.7183	0.192065	-55.8055	0	0
IFNA21	609.773	-10.6834	0.157138	-67.9872	0	0
IFNA22P	1053.02	-11.0267	0.140086	-78.7137	0	0
IFNA5	514.061	-10.7968	0.161516	-66.8468	0	0
IFNB1	21126.9	-10.8859	0.169032	-64.4011	0	0
IFNL1	20263.7	-10.8637	0.172192	-63.0907	0	0
IFNL2	2241.11	-10.9395	0.160198	-68.287	0	0
IFNL3	980.073	-10.6093	0.160861	-65.9535	0	0
IFNL4	2664.57	-9.61744	0.0815997	-117.861	0	0
IFNW1	5413.13	-10.643	0.147791	-72.0141	0	0
IFRD1	907.703	-2.69721	0.0328084	-82.2111	0	0
IGF2	800.581	-9.09599	0.0962348	-94.5188	0	0
IKZF1	3859.12	-1.28906	0.0261196	-49.3523	0	0
IL10RA	36381.6	-2.33168	0.0277319	-84.0794	0	0
IL12A	652.036	-8.59773	0.103727	-82.8879	0	0
IL15	849.24	-1.38522	0.0314893	-43.99	0	0
IL1A	1493.36	-7.4599	0.116622	-63.9663	0	0
IL1B	2468.46	-4.75261	0.120121	-39.5652	0	0
IL1RAP	3543.7	-2.60401	0.0623164	-41.787	0	0
IL6	4585.32	-5.49413	0.0977483	-56.2069	0	0
IL8	28486.2	-4.45605	0.118662	-37.5526	0	0
ING3	383.051	-1.28895	0.0207866	-62.0087	0	0
ING4	207.048	1.00207	0.0256465	39.0725	0	0
INHBA	7697.75	-5.45458	0.114618	-47.589	0	0
INO80	820.806	-0.502175	0.0132259	-37.969	0	0
INTS6	1576.7	-2.23134	0.0268508	-83.1014	0	0
IP6K2	408.593	-0.604023	0.0149322	-40.451	0	0
IQCG	802.206	-1.97878	0.0502308	-39.3938	0	0
IRAK2	2352.02	-5.40681	0.069289	-78.0327	0	0
IRF1	7442.14	-1.6123	0.0259813	-62.0562	0	0
IRF8	2949.66	-1.73798	0.040093	-43.3487	0	0
IRG1	739.378	-6.15215	0.118674	-51.8409	0	0
IRS2	312.529	-3.81954	0.0632824	-60.3571	0	0
ITGAV	5130.39	-1.84592	0.0484135	-38.1282	0	0
ITGB8	1112.06	-4.36327	0.105207	-41.4733	0	0
ITPRIP	1181.49	-1.70673	0.028532	-59.8183	0	0
IVNS1ABP	3621.76	-1.0664	0.0273976	-38.9232	0	0
JAG1	5177.04	-2.95728	0.0398032	-74.2975	0	0
JOSD1	1586.72	-0.978179	0.0197273	-49.585	0	0
JUN	8443.05	-3.518	0.0581727	-60.4752	0	0
KCNA3	552.591	-3.44568	0.08469	-40.6857	0	0
KCNJ2	3603.39	-3.41126	0.0610557	-55.8712	0	0
KDM3B	2092.89	0.616798	0.011472	53.7654	0	0
KDM5B	1692.87	-2.16861	0.0383683	-56.5209	0	0
KDM6A	3086.07	-2.24059	0.0461873	-48.5109	0	0
KDM6B	1817.35	-3.20897	0.042747	-75.0689	0	0
KIAA1191	851.238	-0.95177	0.020628	-46.1397	0	0
KIAA1551	2241.49	1.59811	0.0354972	45.0206	0	0
KIAA1737	573.696	1.18563	0.0268342	44.1836	0	0
KIAA2013	865.177	0.701651	0.0175046	40.0837	0	0
KLF13	5303.52	1.39048	0.0178752	77.7882	0	0
KLF4	4785.57	-3.83408	0.055749	-68.7739	0	0
KLF6	29562.3	-2.06744	0.0312755	-66.1041	0	0
KLF9	894.845	-2.75991	0.0440383	-62.6706	0	0
KLHDC3	849.843	1.10421	0.0244488	45.164	0	0
KLHL6	1867.38	-0.970378	0.0258482	-37.5414	0	0
KMO	2027.52	-2.83558	0.0511643	-55.4211	0	0
KPNA4	2856.73	-0.58095	0.0129896	-44.7242	0	0
KYNU	6462.94	-1.94529	0.0356359	-54.5879	0	0
LAMA2	357.636	-6.08606	0.0773715	-78.6603	0	0
LAMA3	461.551	-6.98983	0.0929142	-75.2289	0	0
LAMTOR3	1181.44	-0.586485	0.015492	-37.8572	0	0
LASP1	4602.21	0.783522	0.0179208	43.7213	0	0
LATS2	2224.06	-1.78774	0.0292669	-61.0841	0	0
LCP2	10729.9	-1.3768	0.0347026	-39.6741	0	0
LDHAL6B	134.579	-4.22165	0.0653305	-64.6198	0	0
LEPREL1	646.723	-3.86506	0.08363	-46.2162	0	0
LIG1	163.639	-4.26353	0.0592046	-72.0136	0	0
LINC00158	149	-3.32902	0.0530643	-62.7356	0	0
LITAF	12859.5	-1.16838	0.0289823	-40.3136	0	0
LMBRD1	1028.77	0.90166	0.0209983	42.9396	0	0
LOC100288255	288.384	-7.36618	0.140531	-52.4167	0	0
LOC100505876	438.09	0.719592	0.0191204	37.6347	0	0
LOC100506499	214.887	-2.32785	0.0537328	-43.3227	0	0
LOC100507217	628.14	-1.78163	0.0286154	-62.2613	0	0
LOC401074	408.349	-2.84999	0.0579284	-49.1985	0	0
LOC440896	598.802	-6.19081	0.0970442	-63.7937	0	0
LOC541471	537.193	-4.86057	0.0790367	-61.4976	0	0
LONRF1	994.028	-2.15512	0.0422343	-51.0277	0	0
LPIN2	3043.72	-1.30709	0.0308119	-42.4217	0	0
LRCH1	1359.88	-1.69038	0.024988	-67.6479	0	0
LRRC1	118.468	-3.8271	0.0703024	-54.4377	0	0
LSM14B	461.019	0.60323	0.0154067	39.1537	0	0
LTA	148.141	-4.80392	0.125338	-38.3276	0	0
MAEA	591.279	0.810426	0.0204249	39.6784	0	0
MAFF	697.69	-4.11278	0.0886239	-46.4071	0	0
MAP2K3	2225.15	-2.65067	0.0339518	-78.0716	0	0
MAP3K2	1979.71	0.676429	0.015549	43.5031	0	0
MAP3K3	839.355	1.59294	0.0295772	53.8573	0	0
MAP3K4	1328.34	-2.079	0.0410497	-50.6458	0	0
MAP3K5	930.421	1.42608	0.0310481	45.9312	0	0
MAP3K8	4813.18	-3.96113	0.0429447	-92.2378	0	0
MAP4K4	4207.76	-2.21969	0.0360032	-61.6525	0	0
MAPK14	1372.42	0.514243	0.0133085	38.6403	0	0
MAPK1IP1L	1843.67	-0.540914	0.012725	-42.5081	0	0
2018-03-08	844.491	1.51456	0.0289567	52.3044	0	0
MAVS	1443.75	0.720007	0.0167427	43.0042	0	0
MB	39.3555	-3.30759	0.0649783	-50.903	0	0
MBNL1	14162.8	-0.767425	0.0199348	-38.4967	0	0
MDM2	6112.88	-2.81761	0.0502719	-56.0474	0	0
MED13	4797.37	-0.752852	0.0150795	-49.9257	0	0
MEMO1	989.964	0.584506	0.0135915	43.0052	0	0
METTL7A	1692.51	1.78538	0.0455442	39.201	0	0
MEX3C	1130.52	-1.30357	0.0271984	-47.9284	0	0
MFHAS1	2055.04	-1.48464	0.0390978	-37.9725	0	0
MFSD2A	234.309	-4.51556	0.0710963	-63.5133	0	0
MIA3	4598.61	-0.807909	0.0161652	-49.9781	0	0
MICA	1257.08	-1.28229	0.0283208	-45.2773	0	0
MIER1	1709.34	-0.582252	0.0120354	-48.3781	0	0
MIF4GD	420.1	1.34047	0.0352553	38.0218	0	0
MIR155HG	3185.87	-6.36328	0.0688838	-92.377	0	0
MIR31HG	327.373	-5.87845	0.0660204	-89.04	0	0
MIR5696	190.442	-4.15679	0.0554356	-74.9842	0	0
MITF	1900.07	-2.77976	0.0443511	-62.6761	0	0
MLXIP	1269.1	1.48389	0.0273882	54.1801	0	0
MOB4	788.301	-0.646537	0.0134809	-47.9595	0	0
MORF4L2	1562.56	-0.925414	0.0174773	-52.9495	0	0
MRPL39	967.963	-3.38664	0.0361294	-93.7366	0	0
MSANTD3	781.159	-1.93211	0.049404	-39.1084	0	0
MSANTD3-TMEFF1	213.075	-2.58048	0.0552729	-46.6862	0	0
MSANTD4	937.539	-1.36977	0.0243809	-56.1821	0	0
MSC	2212.55	-2.5887	0.0547825	-47.2541	0	0
MSX1	142.275	-3.46321	0.0666912	-51.929	0	0
MTM1	1023.45	0.798387	0.0194481	41.0521	0	0
MXD1	9630.41	-3.33205	0.03511	-94.9032	0	0
MYLIP	1027.16	-1.92575	0.0355122	-54.2278	0	0
MYLK3	328.439	-5.01099	0.0772465	-64.8701	0	0
MYO18A	3369.15	1.26537	0.0294009	43.0384	0	0
MYO1A	321.768	-4.34057	0.0563856	-76.9801	0	0
NAB1	1225.83	-1.07498	0.024512	-43.8554	0	0
NAMPT	23597.7	-1.41637	0.0346102	-40.9234	0	0
NANOGP1	91.3249	-4.83553	0.083592	-57.8469	0	0
NAT1	466.454	-2.24871	0.0360025	-62.4598	0	0
NAV2	308.33	-5.83879	0.0709432	-82.3024	0	0
NBN	7017.49	-2.26264	0.0381777	-59.266	0	0
NCOA7	5621.21	-2.25304	0.0335599	-67.1351	0	0
NDEL1	885.379	-0.795373	0.0183125	-43.4334	0	0
NDUFAF5	121.792	-1.30547	0.029365	-44.4565	0	0
NEDD1	1731.63	-1.78467	0.0295511	-60.3929	0	0
NEDD9	2591.7	-7.93678	0.092066	-86.2075	0	0
NETO2	2032.74	-3.54659	0.047378	-74.8573	0	0
NEU4	120.772	-6.95747	0.143613	-48.446	0	0
NEURL3	804.062	-3.49701	0.0915543	-38.196	0	0
NFAT5	1600.57	-1.6375	0.0366356	-44.697	0	0
NFE2L2	7390.85	-1.25123	0.021217	-58.973	0	0
NFIL3	3396.27	-2.08541	0.0455354	-45.7975	0	0
NFKB1	9620.4	-2.4697	0.0438009	-56.3846	0	0
NFKB2	3355.08	-2.11763	0.0406149	-52.1392	0	0
NFKBIA	22597	-3.85738	0.0542079	-71.159	0	0
NFKBIB	452.793	-1.14527	0.0254133	-45.0656	0	0
NFKBID	556.108	-1.57518	0.0394837	-39.8944	0	0
NFKBIE	2375.45	-1.47909	0.0309744	-47.7519	0	0
NFKBIZ	4036.2	-4.98379	0.0602804	-82.6768	0	0
NIPAL4	412.205	-6.03038	0.125302	-48.1266	0	0
NISCH	1392.14	1.64765	0.040084	41.1049	0	0
NKX3-1	84.2748	-4.61254	0.0897265	-51.4067	0	0
NLK	1020.54	0.962465	0.0200444	48.0167	0	0
NMI	4371.88	-0.881141	0.022946	-38.4006	0	0
NPHP1	22.5554	-5.63657	0.135271	-41.6688	0	0
NR3C1	3940.33	-0.825076	0.0205318	-40.1853	0	0
NR4A1	618.544	-5.55631	0.0939972	-59.1114	0	0
NR4A2	1371.91	-5.91276	0.0603072	-98.0439	0	0
NRG2	55.0659	-5.75548	0.0911866	-63.1175	0	0
NSRP1	651.353	-0.728729	0.0142846	-51.0152	0	0
NUP98	3626.07	-0.730232	0.0155101	-47.0812	0	0
NUPL1	1266.64	-0.719959	0.017667	-40.7517	0	0
NXF1	3572.49	-1.16675	0.0307182	-37.9823	0	0
NXT2	869.353	-1.60379	0.0355138	-45.1595	0	0
OASL	29101.2	-3.00883	0.0460905	-65.281	0	0
OSBP	1206.27	-0.511649	0.0122991	-41.6006	0	0
OSBPL5	778.474	1.07666	0.0272559	39.5021	0	0
OSER1	1734.84	-1.70836	0.0277804	-61.4952	0	0
OSM	1049.93	-3.49418	0.0654144	-53.416	0	0
OSR2	693.505	-8.52979	0.0765617	-111.411	0	0
OTUD1	16125.7	-5.57119	0.0446087	-124.89	0	0
OTUD4	3666.3	-1.10147	0.0193285	-56.9865	0	0
P2RX4	1682.09	-1.79901	0.0441445	-40.7527	0	0
P2RX7	3509.54	-2.59977	0.0452697	-57.4285	0	0
P4HA1	1937.58	-0.940318	0.0212983	-44.1498	0	0
PAF1	8872.03	-2.45848	0.0337772	-72.7851	0	0
PAG1	1464.74	-2.00982	0.0420879	-47.753	0	0
PALM2-AKAP2	7080.46	-2.12305	0.0413394	-51.3566	0	0
PAPOLA	3626.13	-0.477773	0.00900847	-53.036	0	0
PAQR8	1374.45	1.62961	0.0347217	46.9334	0	0
PATL1	10437.9	-2.65785	0.033517	-79.2985	0	0
PBDC1	880.671	-0.655178	0.015554	-42.1227	0	0
PDE4B	1709.05	-3.08536	0.0654303	-47.1549	0	0
PDPK1	2312.8	0.686376	0.0126799	54.1312	0	0
PDZD2	176.794	-2.61275	0.0512426	-50.9878	0	0
PELI1	6338.85	-4.82348	0.0359903	-134.021	0	0
PFKFB3	4586.47	-2.9535	0.0644563	-45.8217	0	0
PHACTR2	2883.85	-0.786094	0.0185011	-42.489	0	0
PHLPP1	435.531	-1.8529	0.0442082	-41.9132	0	0
PI4KB	1501.36	-0.74891	0.016447	-45.5349	0	0
PIGS	1031.96	0.698014	0.0160301	43.5439	0	0
PIK3R5	5372.17	-1.37144	0.0336725	-40.7286	0	0
PIP5K1A	1308.51	-0.783627	0.0166552	-47.0499	0	0
PIWIL4	2672.29	-1.93634	0.0303392	-63.823	0	0
PKMYT1	297.786	1.68705	0.0330327	51.0721	0	0
PLA1A	155.237	-3.23736	0.0782436	-41.3754	0	0
PLA2G4A	910.743	-1.986	0.0504494	-39.3662	0	0
PLA2G4C	2887.7	-2.94562	0.0515871	-57.1	0	0
PLAA	1141.76	-0.563388	0.0144744	-38.9232	0	0
PLAUR	5484.6	-2.40927	0.0471104	-51.1409	0	0
PLCB3	873.497	1.01322	0.0217233	46.642	0	0
PLEK	16432.3	-1.32902	0.0255751	-51.9655	0	0
PLEKHA4	2074.16	-6.80756	0.0597749	-113.887	0	0
PLEKHF2	3639.33	-2.13768	0.0337799	-63.2826	0	0
PLK2	337.231	-5.61924	0.0620974	-90.4907	0	0
PLK3	412.54	-3.40893	0.0564942	-60.3413	0	0
PLS3	373.811	-5.73715	0.0887837	-64.6194	0	0
PLXNB2	5691.53	1.14601	0.0269672	42.4966	0	0
PMAIP1	16595.3	-7.39448	0.0590495	-125.225	0	0
PNO1	400.452	-1.3222	0.0236973	-55.7956	0	0
PNPLA6	2864.35	1.01373	0.0240344	42.1782	0	0
PNRC1	12832.8	-3.27313	0.0469944	-69.6495	0	0
PNRC2	4723.14	-1.31549	0.0203913	-64.5121	0	0
POGK	1390.38	0.426649	0.010696	39.8888	0	0
POGLUT1	1804.08	-2.21317	0.054431	-40.66	0	0
POLR3C	882.88	-0.870093	0.0174729	-49.7966	0	0
PPCS	645.502	0.479729	0.012503	38.3693	0	0
PPP1R10	2319.59	-1.59043	0.0215641	-73.7534	0	0
PPP1R15A	66986.2	-6.4473	0.0386873	-166.652	0	0
PPP1R15B	3404.81	-1.85619	0.035423	-52.4009	0	0
PPP1R18	8513.59	-0.901497	0.0223602	-40.317	0	0
PPP1R2	1339.76	-0.728067	0.0176839	-41.1713	0	0
PPP1R9B	2795.5	0.883389	0.0178925	49.372	0	0
PPP2R2A	2255.38	-0.781654	0.0169103	-46.2236	0	0
PPP3CC	1447.21	-0.912011	0.0187001	-48.7703	0	0
PPP4R2	2519.04	-2.19773	0.0296095	-74.2239	0	0
PRAME	180.467	-5.16776	0.088819	-58.183	0	0
PRDM1	3416.75	-2.36307	0.0403557	-58.5559	0	0
PRDM10	203.878	-1.76555	0.0464021	-38.049	0	0
PRPF3	1012.56	-0.951056	0.0204703	-46.4604	0	0
PRRC2C	7028.12	-0.660083	0.0145793	-45.2753	0	0
PRRG4	3297.61	-3.5563	0.0434781	-81.7951	0	0
PRSS23	239.529	-3.31744	0.0791173	-41.9306	0	0
PSPC1	798.247	-0.776498	0.016088	-48.2657	0	0
PTEN	2071.98	-1.0005	0.0221065	-45.2581	0	0
PTGER4	7578.43	-3.78946	0.0490673	-77.2299	0	0
PTGS2	11179.9	-8.18989	0.0634983	-128.978	0	0
PTP4A1	6034.81	-2.02678	0.0342133	-59.2396	0	0
PTPN1	3784.46	-1.4627	0.0260215	-56.2112	0	0
PTPN18	1349.27	1.10698	0.0218055	50.7662	0	0
PTX3	655.752	-4.90702	0.079843	-61.4584	0	0
PVR	685.53	-1.91029	0.0482088	-39.6253	0	0
PXDC1	1828.15	-1.40611	0.0361026	-38.9475	0	0
QTRTD1	974.023	-1.76275	0.0301692	-58.4286	0	0
RAB12	1795.46	-1.13761	0.0226364	-50.256	0	0
RAB21	2008.49	-1.27898	0.0198173	-64.5387	0	0
RAB5A	6493.86	-2.10041	0.0380054	-55.2661	0	0
RAB8B	6486.55	-0.7693	0.0188624	-40.7849	0	0
RAF1	2203.12	-0.992584	0.0224444	-44.2242	0	0
RANBP3L	3061.26	-8.85083	0.0670486	-132.006	0	0
RAP1B	6210.16	-0.846883	0.0195836	-43.2446	0	0
RAP2A	1672.9	1.15612	0.0285573	40.4842	0	0
RAPGEF2	9085.42	-2.64169	0.0330336	-79.9698	0	0
RASL11A	268.232	-5.35402	0.0682641	-78.431	0	0
RASSF5	2615.57	-1.55667	0.0357204	-43.5793	0	0
RBAK-RBAKDN	973.519	-2.42712	0.0450867	-53.8324	0	0
RBBP5	605.759	-0.869138	0.0199726	-43.5166	0	0
RBBP6	3470.18	-1.47156	0.0203717	-72.2354	0	0
RBM38	640.412	-1.48703	0.0395181	-37.629	0	0
RBM43	987.187	0.891635	0.0229652	38.8255	0	0
RBM7	1003.85	-0.634947	0.0121125	-52.4209	0	0
RC3H1	867.605	-0.719197	0.0142119	-50.6052	0	0
RCAN1	6766.39	-3.2784	0.0533603	-61.4389	0	0
RCN1	1211.8	-1.47973	0.0358086	-41.3233	0	0
RELA	2592.03	-1.04492	0.017014	-61.4153	0	0
RERG	40.1202	-6.09445	0.104764	-58.1734	0	0
REV3L	1125.37	-3.85635	0.051519	-74.8531	0	0
RFC2	491.203	-0.941642	0.0231742	-40.6332	0	0
RGS19	812.696	0.931256	0.0229751	40.5333	0	0
RGS2	759.669	-2.86878	0.0550848	-52.0794	0	0
RHCG	565.346	-9.14445	0.111681	-81.8798	0	0
RHEBL1	222.586	-2.76535	0.0542929	-50.9339	0	0
RICTOR	1855.53	-0.762991	0.0179271	-42.5609	0	0
RILPL2	482.054	-2.35555	0.0545936	-43.147	0	0
RIPK1	2973.52	-0.730329	0.0180355	-40.4939	0	0
RIPK2	5492.27	-3.43229	0.0384539	-89.2572	0	0
RLF	1068.09	-1.09519	0.0165709	-66.091	0	0
RLIM	2095.92	-0.896619	0.0174505	-51.3806	0	0
RND1	1304.57	-9.00318	0.0834469	-107.891	0	0
RNF10	2471.79	-0.389604	0.00931625	-41.8198	0	0
RNF11	1199.59	-0.776948	0.0137636	-56.4494	0	0
RNF111	1275.22	-0.586496	0.0118623	-49.4422	0	0
RNF122	233.367	-3.0195	0.0527646	-57.2258	0	0
RNF14	733.638	0.657385	0.0172237	38.1674	0	0
RNF144B	4999.77	-1.13421	0.0265743	-42.6808	0	0
RNF145	2407.78	-1.34852	0.0290349	-46.445	0	0
RNF149	3484.67	-1.06589	0.0243379	-43.7956	0	0
RNF19A	4509.92	-1.2811	0.0259878	-49.2962	0	0
RP2	2614.69	-1.15389	0.0230112	-50.1448	0	0
RPS10-NUDT3	1870.9	0.763421	0.0173614	43.9724	0	0
RPS6KA4	601.695	1.21237	0.0296067	40.9491	0	0
RRN3	983.029	-1.0979	0.0250115	-43.8958	0	0
RSL1D1	1700.32	-1.17573	0.0225889	-52.0492	0	0
RSPRY1	593.05	-0.671504	0.0172662	-38.8913	0	0
RSRC2	1397.06	-1.34241	0.0216714	-61.9439	0	0
RUNX3	2848.02	-1.15293	0.0294423	-39.1591	0	0
RYBP	2326.32	-2.10169	0.0274139	-76.6652	0	0
S1PR2	886.887	1.75856	0.0337476	52.1092	0	0
SAMHD1	13790.3	0.733444	0.0175314	41.8359	0	0
SAP30BP	642.553	-0.485545	0.0128202	-37.8733	0	0
SAR1A	2435.93	-2.11205	0.0299958	-70.4114	0	0
SAV1	1380.1	-1.74066	0.0273959	-63.5371	0	0
SCAMP2	2326.03	0.669649	0.0153345	43.6696	0	0
SCYL2	2430.44	-0.4463	0.0111098	-40.1718	0	0
SDC4	5574.21	-4.95319	0.0599246	-82.6571	0	0
SDHA	1831.27	0.811807	0.0192963	42.0706	0	0
SEC23IP	2088.94	-0.822898	0.0217035	-37.9154	0	0
SEC24B	1249.13	-0.402421	0.0101481	-39.6547	0	0
SELK	1151.96	-1.7372	0.0305573	-56.8505	0	0
SEMA3D	551.853	-8.36882	0.0865064	-96.7422	0	0
SERPINB9	4623.21	-2.16203	0.0409837	-52.7533	0	0
SERTAD1	860.872	-1.46801	0.0255427	-57.4727	0	0
SESN2	456.921	-1.61984	0.0320435	-50.5513	0	0
SETD5	1294.84	-0.593558	0.0153716	-38.6139	0	0
SETD7	1065.08	0.973134	0.0256428	37.9496	0	0
SFPQ	2760.19	-1.08161	0.0167538	-64.5589	0	0
SGPP2	581.803	-5.01473	0.0910604	-55.0704	0	0
SIAH2	1459.46	-1.97748	0.0314864	-62.8041	0	0
SLAMF7	32022.8	-2.71658	0.0668367	-40.6451	0	0
SLC1A3	1925.34	-2.55573	0.0538932	-47.4222	0	0
SLC23A2	1135.39	1.65426	0.0422586	39.1461	0	0
SLC24A6	1145.12	1.20562	0.0230476	52.3101	0	0
SLC25A20	379.634	0.959729	0.025258	37.9971	0	0
SLC25A25	1787.42	-2.38587	0.0439743	-54.256	0	0
SLC2A6	1132.16	-2.25358	0.0560257	-40.2241	0	0
SLC35C1	323.758	0.835187	0.0216916	38.5028	0	0
SLC46A3	1142.65	3.02258	0.0517165	58.4452	0	0
SLC6A12	1083.88	-2.53078	0.0557095	-45.4283	0	0
SLC6A8	927.142	-2.572	0.0379278	-67.8132	0	0
SLC7A5	1695.43	-3.13032	0.0653676	-47.888	0	0
SLCO3A1	1464.58	-0.792907	0.0210727	-37.6271	0	0
SLTM	1518.3	-0.59672	0.0151597	-39.3622	0	0
SMARCA5	6836.88	-0.478645	0.0118288	-40.4645	0	0
SMC4	1685.12	-1.61047	0.0397953	-40.4689	0	0
SMURF1	1062.72	-0.679246	0.0172889	-39.2879	0	0
SNAPC2	222.108	1.05638	0.0247722	42.6437	0	0
SNHG1	488.824	-1.8595	0.0365895	-50.8206	0	0
SNHG12	242.111	-1.87846	0.0394302	-47.64	0	0
SNHG15	336.412	-2.96594	0.0416054	-71.2873	0	0
SNHG16	371.941	-2.9247	0.046525	-62.8631	0	0
SNHG8	339.412	-2.69379	0.041344	-65.1556	0	0
SNX18	674.91	1.43792	0.035558	40.4387	0	0
SNX30	782.96	1.41255	0.0357927	39.4648	0	0
SOCS3	655.743	-3.84733	0.0844304	-45.5681	0	0
SOD2	68517.3	-3.03913	0.0725884	-41.868	0	0
SOGA1	1921.92	1.28952	0.0260754	49.4536	0	0
SORBS3	1221.85	2.34532	0.0583691	40.1809	0	0
SOS2	1014.73	0.801613	0.01877	42.707	0	0
SP1	2712	0.712327	0.0129628	54.9517	0	0
SPAG9	3934.39	-1.48029	0.0311094	-47.5834	0	0
SPEN	4060.77	-0.984252	0.0241884	-40.6911	0	0
SPOP	1397.36	1.01992	0.0248603	41.0262	0	0
SPRY1	387.74	-7.62549	0.0961532	-79.3057	0	0
SPRY2	410.077	-4.29444	0.0810972	-52.9543	0	0
SQRDL	8799.5	-0.552474	0.0144911	-38.125	0	0
SRC	4706.9	-1.37638	0.0295953	-46.5066	0	0
SRFBP1	689.147	-0.836539	0.0213186	-39.2399	0	0
SRGAP2B	1455.78	-0.794042	0.0192667	-41.2132	0	0
SRPK2	2005.94	-1.96146	0.0320932	-61.1177	0	0
SRSF3	3373.17	-0.690652	0.018353	-37.6315	0	0
SSH3	285.159	1.0601	0.0268281	39.5146	0	0
ST7-AS1	198.568	-5.04385	0.0561748	-89.7885	0	0
STK17A	1217.26	-1.70236	0.0261695	-65.0513	0	0
STK17B	2721.9	-1.57716	0.0339911	-46.3994	0	0
STX11	6352.22	-2.71691	0.0306178	-88.7365	0	0
STX12	3496.78	-0.981131	0.0214545	-45.7307	0	0
SUFU	742.182	0.984079	0.0256147	38.4185	0	0
SWT1	614.964	-1.86028	0.0361679	-51.4347	0	0
SYNJ2BP-COX16	826.784	0.496481	0.0125949	39.4191	0	0
SZRD1	3086.02	-0.436821	0.00896229	-48.7399	0	0
TAB2	3207.02	-1.48081	0.0223224	-66.3372	0	0
TAF13	499.106	-0.719925	0.0174698	-41.2096	0	0
TAF1C	665.159	-2.56408	0.0452416	-56.6754	0	0
TAF1D	527.089	-1.86897	0.0292763	-63.8388	0	0
TAF9	911.804	-1.0122	0.023928	-42.3021	0	0
TANGO2	526.939	0.75795	0.0188519	40.2054	0	0
TATDN3	425.403	1.03825	0.0240591	43.1541	0	0
TBC1D14	1944.92	1.52029	0.0266671	57.0099	0	0
TBC1D3G	7623.86	-6.80223	0.120564	-56.4203	0	0
TDG	988.722	-0.673414	0.0169134	-39.8154	0	0
TECPR2	281.034	0.640684	0.0156279	40.9962	0	0
TES	1238.6	-1.63888	0.0338076	-48.4768	0	0
TEX14	260.495	-4.37063	0.0572667	-76.3207	0	0
TEX264	485.398	0.909747	0.0239954	37.9133	0	0
TGIF1	2696.69	-2.7932	0.0372745	-74.9361	0	0
THAP2	121.006	-3.1359	0.0745841	-42.0452	0	0
TIPARP	4018.27	-1.46055	0.032006	-45.6336	0	0
TK2	980.45	1.48748	0.0381865	38.953	0	0
TLL2	165.979	-5.39932	0.064391	-83.8521	0	0
TM9SF2	7053.58	0.85065	0.0186294	45.6618	0	0
TMEM129	326.108	0.941797	0.0221609	42.4981	0	0
TMEM165	1877.5	-1.20911	0.0242218	-49.9181	0	0
TMEM184C	752.888	0.406981	0.0106083	38.3643	0	0
TMEM194A	5423.37	-3.71732	0.0413562	-89.8854	0	0
TMEM217	176.144	-1.92981	0.0470178	-41.0443	0	0
TMEM37	222.142	4.14655	0.104642	39.6262	0	0
TMEM63B	748.059	-1.48321	0.0304524	-48.7059	0	0
TNF	33394.3	-7.17194	0.0650584	-110.238	0	0
TNFAIP2	14903.1	-1.95172	0.0472115	-41.34	0	0
TNFAIP3	42291.6	-5.94538	0.0733997	-81.0001	0	0
TNFAIP6	3656.87	-4.54287	0.0997017	-45.5646	0	0
TNFAIP8	12703.9	-2.68404	0.0354619	-75.6879	0	0
TNFRSF10B	2766.51	-2.12915	0.0309427	-68.8094	0	0
TNFRSF9	1991.81	-5.24775	0.0758518	-69.1842	0	0
TNFSF15	2097.64	-5.91438	0.0991387	-59.6576	0	0
TNFSF18	2854.11	-2.89084	0.0707243	-40.8748	0	0
TNFSF9	529.524	-5.58703	0.0511501	-109.228	0	0
TNIP1	7256.1	-1.61447	0.0358538	-45.0294	0	0
TNIP2	780.219	-1.37134	0.0294579	-46.5525	0	0
TNIP3	1157.74	-5.22361	0.123009	-42.4654	0	0
TOE1	314.813	-2.22534	0.0405622	-54.8624	0	0
TOMM34	1626.54	-2.26192	0.0498564	-45.3686	0	0
TOP1	3740.73	-0.628819	0.0150323	-41.8311	0	0
TOR2A	235.8	0.986815	0.0199897	49.3662	0	0
TP53BP2	2746.28	-1.6313	0.0340257	-47.9431	0	0
TPRG1L	463.64	1.09407	0.0287447	38.0617	0	0
TRAF1	16222.9	-3.80165	0.0774454	-49.0881	0	0
TRAF3	1182.27	-1.07017	0.0248848	-43.0052	0	0
TRAF3IP2	221.117	-3.39761	0.0692944	-49.0316	0	0
TRAF3IP2-AS1	43.3878	-2.274	0.0533896	-42.5926	0	0
TRIM26	3988.89	-1.24047	0.018915	-65.5812	0	0
TRIM27	696.902	0.700253	0.0151868	46.1094	0	0
TRIM33	1497.29	-0.712413	0.0170152	-41.8691	0	0
TRIM6-TRIM34	1149.6	0.824552	0.021168	38.9528	0	0
TRMT44	227.75	-1.78044	0.032733	-54.393	0	0
TRPM3	60.6336	-6.40299	0.108852	-58.8228	0	0
TRPS1	1248.56	-1.50691	0.036234	-41.5884	0	0
TSC22D2	1356.33	-2.51242	0.0296524	-84.729	0	0
TSLP	87.9089	-6.35729	0.106397	-59.7507	0	0
TTC7A	3751.93	1.43556	0.025248	56.8583	0	0
TUBGCP3	659.741	0.466567	0.0120276	38.7913	0	0
TVP23B	560.842	-0.598001	0.0149779	-39.9254	0	0
TWIST1	124.615	-4.76654	0.0943514	-50.519	0	0
UBAC1	621.418	1.00443	0.024329	41.2853	0	0
UBC	59795.6	-0.791696	0.0163785	-48.3374	0	0
UBE2B	1364.73	-0.956078	0.0169403	-56.438	0	0
UBE2D3	8169.51	-0.460475	0.012004	-38.3602	0	0
UBE2E1	4802.93	-1.27958	0.0243202	-52.6137	0	0
UBE2Z	9680.73	-1.40036	0.0294189	-47.6006	0	0
UBN2	648.077	-1.99135	0.0348493	-57.1418	0	0
UBQLN1	2756.62	-0.640415	0.0161972	-39.5386	0	0
UFL1	674.013	0.696571	0.0151402	46.008	0	0
URGCP-MRPS24	718.51	-1.7711	0.0374621	-47.2771	0	0
USP12	2975.46	-2.19374	0.0355168	-61.7662	0	0
USP19	1119.08	0.452363	0.0108569	41.6661	0	0
USP6NL	1142.8	-1.18153	0.0313117	-37.7345	0	0
VANGL2	65.4898	-3.48846	0.0677244	-51.5096	0	0
VCPIP1	5704.09	-1.53113	0.0274205	-55.8389	0	0
VEGFA	353.06	-2.62355	0.053745	-48.8148	0	0
VEZF1	2707.79	-0.776491	0.0190165	-40.8325	0	0
VIPAS39	498.45	0.544234	0.0126776	42.9288	0	0
VPS37A	882.764	-1.17795	0.018443	-63.8696	0	0
VPS37B	352.434	-1.01548	0.0253652	-40.0342	0	0
WAC	3191.29	-0.495173	0.0114967	-43.071	0	0
WASF2	5930.42	0.626742	0.0108611	57.7053	0	0
WASL	1285.62	-1.81538	0.0334766	-54.2285	0	0
WBP11	2530.78	-0.864466	0.0159051	-54.3515	0	0
WBP4	589.237	-0.854601	0.0161051	-53.064	0	0
WDR37	825.478	0.96709	0.0179144	53.9839	0	0
WDR55	256.978	-4.32671	0.06145	-70.4103	0	0
WDR74	300.008	-1.43822	0.0367373	-39.1487	0	0
WDR81	1774.61	1.47451	0.0203859	72.33	0	0
WHAMM	615.16	-1.43927	0.0240568	-59.8281	0	0
WIPI2	967.267	0.668963	0.0155131	43.1224	0	0
WTAP	6283.02	-2.93303	0.0333616	-87.9163	0	0
XBP1	9052.52	-3.54338	0.0382767	-92.5727	0	0
XLOC_000507	54.9173	-5.06884	0.0941413	-53.8429	0	0
XLOC_000917	4186.29	-2.9037	0.0418154	-69.4408	0	0
XLOC_000922	74.4087	-3.96575	0.0793753	-49.962	0	0
XLOC_001094	208.837	-7.0632	0.0845072	-83.581	0	0
XLOC_001229	218.044	-6.79598	0.0766461	-88.667	0	0
XLOC_001310	649.873	-7.31616	0.076269	-95.9258	0	0
XLOC_001334	24.2909	-7.53329	0.177806	-42.3681	0	0
XLOC_001457	261.057	-4.64666	0.0545439	-85.1913	0	0
XLOC_001708	956.944	-4.16184	0.0691259	-60.2067	0	0
XLOC_002066	823.519	-5.13205	0.0631115	-81.3173	0	0
XLOC_002380	3398	-2.34348	0.060539	-38.7103	0	0
XLOC_003348	38.4248	-4.88077	0.09309	-52.4307	0	0
XLOC_003449	879.652	-1.82291	0.0353708	-51.5371	0	0
XLOC_003550	114.842	-8.51119	0.138207	-61.583	0	0
XLOC_003833	112.476	-5.83538	0.0969086	-60.2153	0	0
XLOC_004047	1887.92	-6.77204	0.0546812	-123.846	0	0
XLOC_004138	452.446	-6.79149	0.0727341	-93.3742	0	0
XLOC_004139	454.025	-7.29195	0.0785226	-92.8644	0	0
XLOC_004195	258.891	-5.11065	0.0618581	-82.6189	0	0
XLOC_004199	330.864	-5.92256	0.116406	-50.8785	0	0
XLOC_004622	150.927	-3.39741	0.0834379	-40.7178	0	0
XLOC_004831	175.953	-4.94881	0.0988874	-50.0449	0	0
XLOC_005813	64.3117	-4.15469	0.0785208	-52.912	0	0
XLOC_005931	27.0882	-7.33349	0.165764	-44.2405	0	0
XLOC_006140	184.64	-5.09146	0.0765377	-66.5223	0	0
XLOC_006415	505.741	-5.14806	0.0509657	-101.01	0	0
XLOC_006587	364.122	-4.62653	0.0569185	-81.2835	0	0
XLOC_006850	27.1876	-5.78047	0.11235	-51.4505	0	0
XLOC_007210	75.6989	-2.38973	0.0552732	-43.2348	0	0
XLOC_007339	151.346	-5.82958	0.12151	-47.9761	0	0
XLOC_007355	35.3194	-6.3491	0.124393	-51.0408	0	0
XLOC_007542	526.049	-6.18142	0.0978188	-63.1925	0	0
XLOC_007552	24.1657	-4.57521	0.0945717	-48.3782	0	0
XLOC_007737	29.4733	-4.77456	0.0972806	-49.0803	0	0
XLOC_007878	240.793	-8.60102	0.200366	-42.9266	0	0
XLOC_008558	57.5362	-5.86436	0.103691	-56.5562	0	0
XLOC_008621	23.6082	-7.60003	0.1842	-41.2596	0	0
XLOC_008665	163.328	-8.5603	0.130646	-65.5229	0	0
XLOC_008759	713.427	-3.34721	0.0773498	-43.2737	0	0
XLOC_008806	99.3088	-3.99144	0.0873925	-45.6726	0	0
XLOC_008811	34.8925	-3.23733	0.0632364	-51.1941	0	0
XLOC_008870	48.2666	-4.31019	0.0727299	-59.2629	0	0
XLOC_009353	52.6774	-8.91401	0.198426	-44.9236	0	0
XLOC_009614	312.95	-5.68011	0.0788724	-72.0165	0	0
XLOC_009627	249.048	-5.20126	0.0755136	-68.8785	0	0
XLOC_009670	427.908	-10.1946	0.128757	-79.1766	0	0
XLOC_009742	32.6858	-6.37191	0.126925	-50.2022	0	0
XLOC_009769	210.988	-3.99514	0.0611178	-65.3679	0	0
XLOC_009902	6259.14	-10.8164	0.180947	-59.7765	0	0
XLOC_009905	235.932	-10.5834	0.170052	-62.236	0	0
XLOC_009907	23.9042	-7.00598	0.169158	-41.4167	0	0
XLOC_009945	140.293	-6.824	0.111207	-61.363	0	0
XLOC_010171	72.6248	-9.31894	0.200183	-46.5521	0	0
XLOC_010363	189.933	-6.05548	0.116226	-52.1007	0	0
XLOC_010364	229.756	-7.9572	0.142525	-55.8301	0	0
XLOC_010457	283.66	-4.86922	0.0612495	-79.4981	0	0
XLOC_010626	124.175	-3.62582	0.0779909	-46.4903	0	0
XRN2	2431.47	0.47937	0.0119608	40.0784	0	0
XXYLT1-AS2	91.7662	-6.12734	0.0963287	-63.6086	0	0
YTHDC1	1113.29	-0.542863	0.0135739	-39.9931	0	0
ZBTB10	2788.54	-3.68586	0.0454601	-81.0789	0	0
ZBTB2	599.613	-1.44268	0.030667	-47.0433	0	0
ZBTB38	3590.03	-1.25741	0.0327313	-38.416	0	0
ZBTB43	1003.11	-1.19303	0.0225455	-52.9165	0	0
ZC3H12A	1274.37	-1.74781	0.0352597	-49.5697	0	0
ZC3H12C	4069.83	-3.92889	0.0603996	-65.0483	0	0
ZC3H15	1103.89	-0.604429	0.0157827	-38.2969	0	0
ZC3H4	1205.52	-0.727927	0.0175221	-41.5433	0	0
ZC3HAV1	12008.7	-2.93551	0.028106	-104.444	0	0
ZCCHC6	4403.16	-1.44344	0.0248251	-58.1443	0	0
ZEB2-AS1	173.046	-2.61498	0.0466848	-56.0135	0	0
ZFAS1	1265.89	-2.04177	0.0273259	-74.7189	0	0
ZFP36L2	6094.02	-2.46041	0.0502533	-48.9601	0	0
ZFX	2096.28	-2.49474	0.047213	-52.8401	0	0
ZFYVE21	296.217	0.975073	0.0196884	49.5253	0	0
ZHX2	443.564	-2.44493	0.041767	-58.5374	0	0
ZMYM3	681.955	1.27485	0.0303466	42.0097	0	0
ZNF124	981.181	-1.33797	0.0352922	-37.9111	0	0
ZNF131	475.007	-1.14492	0.0270961	-42.2542	0	0
ZNF136	637.725	-1.45507	0.0249091	-58.415	0	0
ZNF140	381.622	-1.02692	0.0222154	-46.2257	0	0
ZNF181	108.61	0.628675	0.0143215	43.8973	0	0
ZNF259	541.045	-0.719163	0.0176277	-40.7974	0	0
ZNF267	4902.52	-1.74006	0.0271685	-64.0468	0	0
ZNF274	857.793	-0.978097	0.025347	-38.5883	0	0
ZNF410	734.47	-0.712658	0.0158058	-45.0884	0	0
ZNF503	556.431	-5.70322	0.053892	-105.827	0	0
ZNF622	736.771	-1.22031	0.024326	-50.1646	0	0
ZNF697	559.038	-4.92774	0.0890215	-55.3545	0	0
ZNF768	305.012	1.13916	0.0274492	41.5006	0	0
ZNF79	495.634	-3.88845	0.0483087	-80.4917	0	0
ZNFX1	22306.7	-0.871197	0.0190896	-45.6372	0	0
ZSWIM6	1685.58	-0.901861	0.0227061	-39.7188	0	0
CACNA1A	166.912	-1.97585	0.0527015	-37.4914	1.2737e-307	1.78297e-306
HLX	1830.25	-1.20498	0.0321541	-37.4751	2.34788e-307	3.28103e-306
RAB2B	537.657	-0.728504	0.0194585	-37.4388	9.14723e-307	1.27718e-305
FXYD6-FXYD2	826.293	-2.01259	0.0537712	-37.4288	1.32813e-306	1.85283e-305
DYRK1A	1255.18	-0.420593	0.0112449	-37.4031	3.48292e-306	4.85064e-305
CD83	25600.5	-2.43374	0.0651035	-37.3827	7.46755e-306	1.03912e-304
SHOC2	2495.7	-0.676078	0.018087	-37.3793	8.4843e-306	1.1796e-304
STARD5	510.667	-1.18993	0.0318572	-37.3519	2.36352e-305	3.28329e-304
KDELC2	1012.48	-1.22152	0.0327587	-37.2885	2.5206e-304	3.49558e-303
TRIM65	336.023	1.22104	0.0327509	37.2825	3.15552e-304	4.37238e-303
RELB	1757.29	-1.39505	0.0374541	-37.2471	1.18113e-303	1.63384e-302
KIAA0040	5898.62	-0.655921	0.0176142	-37.2382	1.64485e-303	2.27339e-302
SYK	3472.96	0.991159	0.0266222	37.2306	2.18337e-303	3.01514e-302
ENTPD4	937.095	0.704221	0.0189248	37.2115	4.44977e-303	6.13979e-302
HNRNPK	12199.4	-0.385435	0.0103643	-37.1887	1.03819e-302	1.43009e-301
WNK1	7466.15	-0.641003	0.0172677	-37.1214	1.26768e-301	1.74327e-300
DHX58	5714.87	-0.831101	0.0224186	-37.0719	7.95836e-301	1.09075e-299
TOB1	670.133	-1.28156	0.0345697	-37.0718	7.99228e-301	1.09448e-299
ATG3	3656.69	-0.734357	0.0198129	-37.0646	1.04354e-300	1.42667e-299
XLOC_007942	55.5948	-9.95108	0.268682	-37.0367	2.94549e-300	4.02018e-299
BC061919	137.417	-1.9702	0.0532282	-37.0143	6.75449e-300	9.21128e-299
TAC3	40.6933	-9.51995	0.257222	-37.0106	7.7407e-300	1.05474e-298
CTNNB1	6016.98	-0.918867	0.0248488	-36.9783	2.55456e-299	3.47793e-298
REEP4	408.322	1.02674	0.0277718	36.9707	3.39269e-299	4.61518e-298
MTF1	722.505	-1.37246	0.037156	-36.9377	1.14641e-298	1.55692e-297
RRAS2	72.8296	-3.01458	0.0816451	-36.923	1.97291e-298	2.67272e-297
HPS3	723.604	0.988782	0.0267823	36.9192	2.2701e-298	3.07279e-297
PMS2P3	60.03	-2.14081	0.0580274	-36.893	5.98092e-298	8.08905e-297
IFIT2	14198.7	-1.43317	0.0388495	-36.8903	6.61451e-298	8.93859e-297
DDIT4	313.891	-3.31898	0.0900827	-36.8437	3.69293e-297	4.98637e-296
2018-03-01	4431.47	1.14229	0.03101	36.8362	4.85764e-297	6.55361e-296
SLC4A7	579.736	-1.17434	0.0318916	-36.8231	7.89473e-297	1.06336e-295
HPS6	712.623	0.59603	0.016197	36.7987	1.93697e-296	2.60466e-295
TAGAP	1813.19	-1.5395	0.0418559	-36.781	3.71615e-296	4.99304e-295
SLC48A1	438.501	1.72247	0.0468368	36.776	4.46453e-296	5.99366e-295
GCNT1	5033.44	1.56479	0.0425515	36.7742	4.7779e-296	6.40911e-295
GLG1	2902.01	0.596824	0.0162361	36.759	8.33537e-296	1.11629e-294
WDR60	184.768	-1.47797	0.0402118	-36.7547	9.77322e-296	1.30778e-294
IMPACT	564.423	0.776507	0.0211812	36.6603	3.14033e-294	4.18506e-293
GADD45G	329.266	-2.22507	0.060698	-36.658	3.41297e-294	4.54472e-293
EGR2	4487.01	-2.34896	0.0640854	-36.6535	4.01929e-294	5.34774e-293
NSL1	741.266	0.581775	0.0158766	36.6435	5.80174e-294	7.70682e-293
ZBTB4	1179.22	1.01909	0.0278161	36.6368	7.42917e-294	9.86065e-293
STAG2	2345.74	-0.900292	0.0245792	-36.6283	1.01564e-293	1.34695e-292
ZCCHC10	611.597	-0.638212	0.0174391	-36.5965	3.24598e-293	4.30138e-292
C5orf15	3724.65	-0.916168	0.0250367	-36.5931	3.68904e-293	4.88456e-292
NUAK2	260.985	-2.00412	0.0547868	-36.5803	5.8909e-293	7.78738e-292
STRN3	371.576	-0.635691	0.0173851	-36.5652	1.02244e-292	1.35051e-291
RQCD1	832.25	-0.707537	0.0193684	-36.5305	3.63873e-292	4.7947e-291
RAET1L	26.9025	-8.4071	0.230303	-36.5045	9.40032e-292	1.23569e-290
LEPROTL1	1236.3	0.527179	0.0144482	36.4876	1.74488e-291	2.29e-290
PAPD5	1059.77	-0.612012	0.0167747	-36.4843	1.97094e-291	2.58462e-290
JMJD1C	2446.53	-1.153	0.0316127	-36.4727	3.00977e-291	3.94374e-290
SAFB2	628.045	-0.674288	0.0184982	-36.4515	6.5116e-291	8.51861e-290
UBALD2	417.401	-1.11516	0.030604	-36.4383	1.05314e-290	1.37445e-289
PPM1K	4368.27	-0.781308	0.0214486	-36.427	1.59017e-290	2.07367e-289
DAP	2839.8	-0.752079	0.0206788	-36.3695	1.29113e-289	1.6797e-288
ARHGEF2	2897.22	-0.713949	0.0196348	-36.3615	1.72936e-289	2.24803e-288
CCSER2	2011.15	-0.872624	0.0240038	-36.3536	2.30762e-289	2.99735e-288
TDRD7	5688.93	-0.659841	0.0181544	-36.346	3.04244e-289	3.94555e-288
SEC24A	1965.68	-0.610167	0.016793	-36.3346	4.59658e-289	5.9563e-288
CEBPG	788.003	-0.681742	0.0187707	-36.3196	7.94431e-289	1.02619e-287
ELK1	806.236	-0.818804	0.0225515	-36.3082	1.20314e-288	1.55168e-287
PPP2R4	3302.59	0.596543	0.0164383	36.2898	2.34127e-288	3.01478e-287
MYO1F	2943.06	0.609815	0.0168198	36.2558	8.06056e-288	1.03468e-286
EIF2A	1201.9	-0.602451	0.0166311	-36.2244	2.5107e-287	3.21527e-286
ZFP36L1	8908.44	-1.32427	0.0365593	-36.2225	2.69395e-287	3.44724e-286
ABCD2	209.902	-3.0911	0.0853497	-36.2169	3.30138e-287	4.21794e-286
PDSS1	673.238	-2.108	0.0582404	-36.1948	7.35188e-287	9.38567e-286
MAP2K1	1734	-0.644767	0.0178323	-36.1572	2.86538e-286	3.6552e-285
ZC3H11A	3074.35	-0.421896	0.0116836	-36.1101	1.57453e-285	2.00542e-284
SPAST	728.012	0.547659	0.0151674	36.1077	1.71525e-285	2.18295e-284
TADA2B	539.255	0.45024	0.0124715	36.1014	2.15395e-285	2.73915e-284
ZUFSP	373.711	-0.656668	0.0182077	-36.0653	7.93441e-285	1.00666e-283
PPTC7	1618.16	-0.609454	0.0169032	-36.0555	1.13043e-284	1.43199e-283
MLEC	3889.26	0.897256	0.0248927	36.0449	1.6553e-284	2.09527e-283
CD44	16463.9	-1.30627	0.036249	-36.0361	2.27926e-284	2.88285e-283
PPP2R2D	416.807	-0.577107	0.0160156	-36.0339	2.46137e-284	3.11078e-283
HSPH1	4316.36	-0.812433	0.0225512	-36.0262	3.2538e-284	4.10911e-283
PHIP	2288.54	-0.567113	0.0157755	-35.9491	5.23067e-283	6.58534e-282
TMUB2	1089.51	0.651068	0.0181209	35.9292	1.07018e-282	1.34527e-281
PSMB8	1147.86	1.16824	0.0325257	35.9175	1.63071e-282	2.04832e-281
MYSM1	647.44	-0.676938	0.0188546	-35.9031	2.73213e-282	3.42656e-281
NSD1	1305.26	0.888313	0.0247427	35.902	2.84476e-282	3.56509e-281
SNIP1	588.388	-0.46856	0.0130552	-35.8907	4.26569e-282	5.34173e-281
CGGBP1	2830.38	-0.716996	0.0199903	-35.8673	9.88825e-282	1.23637e-280
C19orf26	22.3574	-4.00402	0.111641	-35.8651	1.06936e-281	1.33605e-280
TET3	1959.61	0.612614	0.0170861	35.8546	1.55958e-281	1.94556e-280
LOC100506746	192.776	-1.17481	0.0327703	-35.8498	1.85343e-281	2.31037e-280
ST7	674.418	-0.965865	0.0269488	-35.8407	2.56538e-281	3.19542e-280
H3F3B	15801.4	-0.618341	0.0172534	-35.8387	2.75485e-281	3.42882e-280
FTSJ2	402.358	0.888099	0.0247871	35.8291	3.89786e-281	4.84778e-280
SMAD4	1499.82	-0.531037	0.0148338	-35.7992	1.13507e-280	1.40848e-279
GALNT1	3848.65	-0.75032	0.0209619	-35.7945	1.34437e-280	1.66694e-279
MASTL	2219.59	-0.803864	0.0224648	-35.7832	2.0152e-280	2.49496e-279
NUP153	2579.35	-0.711381	0.0198814	-35.7812	2.16553e-280	2.67904e-279
RNF44	524.669	1.0354	0.028947	35.7686	3.39429e-280	4.19602e-279
SLC39A8	5004.9	-2.55254	0.0713659	-35.767	3.602e-280	4.44943e-279
CNOT8	1211.4	0.569872	0.0159437	35.7427	8.57737e-280	1.05874e-278
CHTF8	2698.42	0.327817	0.00917403	35.7332	1.20742e-279	1.48924e-278
NIF3L1	246.947	0.910128	0.0254708	35.7322	1.24995e-279	1.54054e-278
KAT5	856.269	-0.419366	0.0117385	-35.7256	1.58441e-279	1.95129e-278
GAS2L3	615.921	-1.54081	0.0431316	-35.7236	1.70244e-279	2.09508e-278
DKK1	19.0586	-7.32854	0.20522	-35.7106	2.70403e-279	3.32516e-278
PIM3	4367.04	-1.21272	0.0339717	-35.698	4.2491e-279	5.20952e-278
LRRC25	152.882	3.19658	0.0895653	35.69	5.66046e-279	6.9347e-278
MECP2	778.067	-1.07791	0.0302301	-35.657	1.83757e-278	2.24787e-277
DNMT1	4552.93	1.0723	0.0300732	35.6564	1.87246e-278	2.28884e-277
KMT2C	3028.43	-0.965859	0.0270997	-35.641	3.24841e-278	3.96781e-277
CISH	3948.62	0.624636	0.0175365	35.6193	7.04572e-278	8.59966e-277
RMND5A	821.028	-1.26661	0.035567	-35.6119	9.1601e-278	1.11721e-276
ETF1	2536.86	-0.355474	0.00998538	-35.5994	1.42944e-277	1.74211e-276
SEMA7A	1770.18	-1.87342	0.0526346	-35.593	1.80087e-277	2.19153e-276
TRIM13	415.676	-0.97755	0.0274656	-35.5918	1.87804e-277	2.28374e-276
DNAJC6	488.144	-2.14661	0.0603497	-35.5695	4.14411e-277	5.03187e-276
TGS1	627.971	-0.553414	0.0155624	-35.5609	5.63668e-277	6.83406e-276
SLC2A3	1893.23	-2.04349	0.0575346	-35.5175	2.63682e-276	3.18987e-275
RPE	862.56	0.594804	0.0167523	35.5059	3.98867e-276	4.81814e-275
PHF20L1	918.336	-1.08849	0.0306591	-35.5031	4.40146e-276	5.31287e-275
CDC23	427.328	0.627407	0.017687	35.4728	1.29193e-275	1.55487e-274
IGF2-AS	57.0038	-10.7232	0.302595	-35.4374	4.52814e-275	5.44573e-274
SLC39A10	638.517	1.20552	0.0340329	35.4221	7.79271e-275	9.36497e-274
HDAC5	343.41	1.21608	0.0343318	35.4213	8.01992e-275	9.63095e-274
AKIP1	338.613	0.727855	0.0205661	35.3911	2.34187e-274	2.81024e-273
C14orf159	1169.04	0.940126	0.0265688	35.3846	2.9478e-274	3.53477e-273
hCG_2003567	298.362	-2.64822	0.0748746	-35.3688	5.16101e-274	6.18416e-273
RAB42	229.132	2.50256	0.0707902	35.3518	9.4187e-274	1.12694e-272
CCNL1	2739.86	-0.752597	0.0213005	-35.3323	1.87475e-273	2.2415e-272
RSF1	1198.75	-0.398223	0.0112744	-35.3209	2.80112e-273	3.34664e-272
KANK1	611.393	-2.92405	0.0828137	-35.3087	4.31083e-273	5.14662e-272
APPL2	511.005	1.47273	0.0417199	35.3005	5.762e-273	6.87414e-272
C11orf21	297.877	1.92369	0.054514	35.288	8.98451e-273	1.07108e-271
INSIG1	4012.35	-1.72783	0.0489661	-35.2863	9.52326e-273	1.13366e-271
ARID4A	1157.84	-0.655358	0.0185826	-35.2673	1.86102e-272	2.21217e-271
PTPN12	3255.55	-0.936986	0.0265963	-35.23	6.95681e-272	8.25152e-271
UBE2H	1158.36	-0.53381	0.0151619	-35.2073	1.54368e-271	1.82965e-270
NAIP	3912.19	1.67583	0.0476138	35.1963	2.27758e-271	2.69755e-270
PABPC4	1948.95	-0.912117	0.0259318	-35.1736	5.06131e-271	5.99025e-270
RBBP8	487.306	-1.06459	0.0302797	-35.1587	8.56303e-271	1.01274e-269
PIM2	401.282	-1.27986	0.0364113	-35.1501	1.15949e-270	1.37033e-269
ASB8	514.233	0.451469	0.0128485	35.1379	1.77813e-270	2.09842e-269
XLOC_004557	477.302	-1.55362	0.044233	-35.1236	2.94571e-270	3.47382e-269
ARFGAP2	1221.34	0.393554	0.0112092	35.1101	4.73141e-270	5.57565e-269
DNAJB9	821.621	-0.9674	0.0275586	-35.1034	5.98448e-270	7.04724e-269
CDKN2B-AS1	91.9979	-1.25594	0.0358118	-35.0707	1.88645e-269	2.21986e-268
MAPKAPK2	1104.12	-1.05777	0.0301848	-35.043	4.98366e-269	5.84768e-268
MYO1E	7681.95	-0.946387	0.0270094	-35.0392	5.69425e-269	6.67669e-268
KLHL12	816.393	0.448563	0.0128075	35.0235	9.85978e-269	1.15526e-267
CCNC	745	-0.434192	0.0124005	-35.0141	1.37452e-268	1.60936e-267
ERI2	1517.46	-1.31274	0.0375207	-34.9871	3.53401e-268	4.13487e-267
MCMBP	2453.79	-0.610704	0.0174631	-34.9711	6.19067e-268	7.23804e-267
SUPT20H	948.994	-0.552808	0.0158198	-34.9441	1.59194e-267	1.8573e-266
PSTPIP2	2766.08	-1.94838	0.0557867	-34.9255	3.046e-267	3.54616e-266
PRKAR2A	738.906	0.58617	0.0168027	34.8856	1.22995e-266	1.4309e-265
TMEM107	84.0171	1.0338	0.0296647	34.8494	4.34096e-266	5.0466e-265
ABTB2	1376.24	-1.30899	0.0375752	-34.8365	6.8158e-266	7.91811e-265
AP3M1	1082.52	0.467626	0.0134263	34.8292	8.79073e-266	1.01908e-264
FAM160B2	435.625	0.724982	0.0208178	34.8251	1.01369e-265	1.17431e-264
UBB	9471.21	-0.673725	0.0193663	-34.7885	3.63423e-265	4.19819e-264
GRB2	8340.68	0.510432	0.0147141	34.69	1.11418e-263	1.28527e-262
KAT7	1184.44	0.702522	0.0202543	34.6851	1.32176e-263	1.52364e-262
MORC3	2547.63	-0.498014	0.0143756	-34.643	5.6908e-263	6.55082e-262
WARS	31673.6	-1.22013	0.0352515	-34.6121	1.66101e-262	1.90934e-261
CKB	480.234	-2.12408	0.0613684	-34.612	1.66876e-262	1.91692e-261
MB21D1	2174.13	-0.724341	0.0209304	-34.6072	1.97204e-262	2.2637e-261
HVCN1	270.778	1.1932	0.034502	34.5836	4.46395e-262	5.117e-261
IDO1	13139.7	-2.61287	0.075594	-34.5645	8.62777e-262	9.88305e-261
ARHGAP4	1196.5	0.91157	0.0263736	34.5637	8.86337e-262	1.01458e-260
CDK12	1556.38	-0.399966	0.0115835	-34.529	2.94239e-261	3.35408e-260
ADORA2A-AS1	117.014	-3.1188	0.0903298	-34.5268	3.1835e-261	3.6264e-260
DNAJA4	492.213	-0.876601	0.0253996	-34.5124	5.23331e-261	5.95312e-260
IDH1	4367.55	1.0137	0.029378	34.5055	6.62284e-261	7.52854e-260
FXR1	1535.82	-0.358827	0.0104007	-34.5002	7.95455e-261	9.03611e-260
OPN3	563.455	-1.12472	0.0326055	-34.4948	9.59553e-261	1.08927e-259
MYCL1	256.92	1.90538	0.0552551	34.4834	1.42516e-260	1.61669e-259
TMCC2	235.417	-2.49519	0.0724169	-34.4559	3.66992e-260	4.16026e-259
GBP4	14038	-1.41633	0.0411186	-34.4449	5.36964e-260	6.08287e-259
BACH1	2191.7	-0.928051	0.0269461	-34.441	6.13096e-260	6.94052e-259
KIAA0195	697.989	0.629661	0.0182857	34.4346	7.66583e-260	8.66609e-259
SRGAP2	7274.58	-0.530408	0.015406	-34.4287	9.39644e-260	1.06152e-258
VPS26B	502.525	1.0109	0.0293659	34.4241	1.09809e-259	1.23966e-258
UBAP1	909.645	-0.498888	0.0144974	-34.4123	1.65117e-259	1.8603e-258
SUOX	601.687	0.868382	0.0252557	34.3836	4.42726e-259	4.98432e-258
ZNF277	1266.15	-0.826491	0.0240397	-34.3802	4.98171e-259	5.60469e-258
ACBD3	881.258	-0.444898	0.0129423	-34.3755	5.86293e-259	6.59157e-258
LOC344887	510.298	-2.02019	0.0588074	-34.3527	1.28318e-258	1.44167e-257
ADAP2	2949.92	0.799444	0.0232761	34.3462	1.60591e-258	1.80302e-257
SLC7A8	4700.84	1.76283	0.0513524	34.3281	2.98988e-258	3.35226e-257
FIG4	1410.01	1.03572	0.0302073	34.2872	1.21949e-257	1.36543e-256
TMEM19	1772.04	0.778623	0.0227131	34.2808	1.51606e-257	1.69633e-256
HERC5	26562	-1.58189	0.0461487	-34.2781	1.66388e-257	1.86046e-256
REL	5052.84	-1.76704	0.0515925	-34.25	4.36384e-257	4.87275e-256
IL15RA	1817.55	-1.5095	0.0440799	-34.2445	5.26454e-257	5.87449e-256
ZNF799	274.093	-2.15401	0.0629313	-34.228	9.26298e-257	1.03292e-255
GIT2	1984	0.456761	0.013361	34.1862	3.88378e-256	4.32493e-255
STRADB	377.576	0.709675	0.020764	34.1781	5.11024e-256	5.68683e-255
HECTD3	668.817	0.656201	0.0192149	34.1506	1.31108e-255	1.45703e-254
VSIG10L	285.322	0.892077	0.0261292	34.1411	1.81379e-255	2.01434e-254
RERE	3115.87	0.735468	0.0215507	34.1273	2.90772e-255	3.22703e-254
GBP1P1	927.501	-1.48086	0.0434036	-34.1183	3.9446e-255	4.37482e-254
UGP2	7149.72	-0.962878	0.0282287	-34.1099	5.26177e-255	5.82776e-254
ADORA2A	246.879	-2.88306	0.084536	-34.1046	6.31277e-255	6.9871e-254
CLIC4	11257.9	-0.669043	0.0196223	-34.096	8.44495e-255	9.34073e-254
ZNF589	398.182	1.1423	0.0335286	34.0696	2.08145e-254	2.30068e-253
IFNGR1	2936.3	0.891949	0.0261831	34.0659	2.36244e-254	2.60951e-253
C2CD4B	31.6414	-9.44299	0.277279	-34.0559	3.31477e-254	3.65651e-253
SERPINE1	924.254	-3.17593	0.0933215	-34.0321	7.45723e-254	8.22051e-253
TMPRSS13	1375.69	-1.9946	0.0586703	-33.9968	2.48625e-253	2.73889e-252
SASH3	1829.5	1.14464	0.0336739	33.992	2.92896e-253	3.22441e-252
KIAA0319L	951.851	0.469637	0.0138168	33.9904	3.09207e-253	3.40169e-252
PARP1	2480.83	0.907212	0.0267023	33.9751	5.19432e-253	5.71062e-252
PQLC3	1107.53	0.716807	0.0211228	33.9353	2.01157e-252	2.20855e-251
TAF7	1652.5	-0.497591	0.0146648	-33.9309	2.32979e-252	2.55622e-251
LRP12	1535.05	-1.67335	0.0493285	-33.9225	3.10652e-252	3.40616e-251
CHMP5	2811.52	-0.473072	0.0139497	-33.9127	4.32338e-252	4.73406e-251
JAK2	5782.96	-0.670538	0.0197794	-33.9008	6.49032e-252	7.10209e-251
RXRA	1936.33	1.3045	0.0385081	33.8759	1.50937e-251	1.64944e-250
EIF5B	1967.55	-0.589789	0.0174218	-33.8536	3.21709e-251	3.50862e-250
CBWD5	187.366	-1.69327	0.05003	-33.845	4.29712e-251	4.6803e-250
NCKAP1L	9965.59	0.639021	0.0188866	33.8345	6.12752e-251	6.66948e-250
ATF6B	1914.14	0.585061	0.0172968	33.8248	8.51715e-251	9.26431e-250
SLK	1683.23	-0.509701	0.0150697	-33.8229	9.07505e-251	9.8646e-250
AP1S3	136.483	-1.47909	0.0437511	-33.807	1.55744e-250	1.68958e-249
ADCK2	447.739	1.12573	0.0333012	33.8044	1.70049e-250	1.84355e-249
ANO8	195.105	1.01191	0.0299397	33.7983	2.08641e-250	2.25894e-249
ZDHHC5	3320.7	-0.472867	0.0139988	-33.7791	4.00487e-250	4.33033e-249
PEX11B	448.91	0.600416	0.0177986	33.734	1.83606e-249	1.97744e-248
PCF11	1902.34	-0.558487	0.0165699	-33.7049	4.90577e-249	5.28006e-248
ARL3	131.157	1.00182	0.0297237	33.7043	5.00723e-249	5.38573e-248
NUP188	1571.12	-0.933826	0.0277163	-33.6923	7.50418e-249	8.06613e-248
CLTC	10670.6	0.502174	0.0149093	33.6819	1.06406e-248	1.143e-247
RBM17	868.013	-0.606358	0.0180027	-33.6816	1.07614e-248	1.15521e-247
NAB2	582.264	-1.53516	0.045585	-33.677	1.25736e-248	1.34887e-247
PSMA1	2086.04	-0.352045	0.010455	-33.6725	1.46112e-248	1.56642e-247
PNP	695.312	-1.62612	0.0482943	-33.6711	1.53074e-248	1.63999e-247
GBP1	27390.9	-1.35358	0.0402024	-33.6692	1.63377e-248	1.74923e-247
DDX58	36139.8	-1.12058	0.0333445	-33.6061	1.36531e-247	1.45799e-246
ORMDL1	1004.75	-0.919792	0.0274005	-33.5684	4.85583e-247	5.17871e-246
2018-03-06	1680.16	0.40519	0.012095	33.5007	4.71057e-246	5.014e-245
TRAPPC8	1294.95	0.318417	0.00950533	33.4988	5.0203e-246	5.34022e-245
CBWD1	724.543	-1.0162	0.0303481	-33.4846	8.06534e-246	8.57374e-245
GORASP1	878.995	0.600491	0.0179338	33.4838	8.3041e-246	8.81689e-245
DARS	1525.06	-0.694693	0.0207532	-33.4741	1.14826e-245	1.21827e-244
WHSC1L1	1123.22	-0.479671	0.0143365	-33.458	1.96661e-245	2.08247e-244
PKD1L1	10.5989	-4.24903	0.127001	-33.4567	2.05703e-245	2.17681e-244
TARS	1851.81	-0.747813	0.022365	-33.4367	4.01573e-245	4.24409e-244
C8orf76	436.316	-0.483092	0.0144608	-33.407	1.08482e-244	1.14578e-243
LRRFIP2	1701.5	-0.94344	0.0282464	-33.4004	1.35259e-244	1.42767e-243
RNF166	288.024	1.35395	0.0405747	33.3693	3.81999e-244	4.02943e-243
TMEM164	1062.87	0.624022	0.018704	33.3631	4.70701e-244	4.96188e-243
YBX3	1124.47	-0.730543	0.021916	-33.3337	1.25301e-243	1.32001e-242
PLIN2	757.742	-1.37768	0.0413345	-33.3299	1.42272e-243	1.49783e-242
VPS52	818.456	0.414216	0.0124301	33.3236	1.75916e-243	1.85085e-242
CRTAP	1427.81	0.799302	0.0239871	33.3221	1.84537e-243	1.9403e-242
BIRC2	2322.7	-0.550523	0.0165225	-33.3196	2.00927e-243	2.11128e-242
CHP1	1871.12	-0.736959	0.0221294	-33.3022	3.5851e-243	3.76229e-242
ETV3	6217.89	-1.89455	0.056907	-33.292	5.03607e-243	5.28159e-242
HIF1A	13388.1	-0.947254	0.028463	-33.2802	7.4592e-243	7.81786e-242
VDAC2	1778.81	-0.645294	0.0194071	-33.2503	2.01903e-242	2.10937e-241
2018-03-02	493.998	0.757546	0.0227875	33.2439	2.50206e-242	2.61235e-241
C15orf26	86.5194	-3.31949	0.0998614	-33.2409	2.75934e-242	2.87913e-241
AAMP	1214.35	0.610438	0.0183646	33.2399	2.85759e-242	2.97975e-241
LUZP6	6879.26	-0.490285	0.0147515	-33.2363	3.223e-242	3.35864e-241
ECD	497.935	-0.525152	0.0158023	-33.2325	3.64839e-242	3.79952e-241
TIPRL	1031.57	-0.571586	0.0172098	-33.2129	7.01987e-242	7.29674e-241
PLD6	794.752	-0.790465	0.0238299	-33.1712	2.80268e-241	2.90953e-240
PSMD5	742.057	-0.884879	0.0266773	-33.1697	2.94133e-241	3.05154e-240
OSBPL11	967.405	0.747141	0.0225458	33.1387	8.22804e-241	8.53093e-240
KMT2E	2809.16	-0.598	0.0180458	-33.1379	8.45497e-241	8.76068e-240
ID2	3516.63	-1.76212	0.0531911	-33.1281	1.17107e-240	1.21188e-239
ABHD10	366.779	1.05044	0.0317202	33.1159	1.75241e-240	1.81233e-239
TRIM14	2570.22	1.14892	0.0347115	33.0991	3.05898e-240	3.1596e-239
USP16	967.591	-0.469156	0.0141797	-33.0864	4.65983e-240	4.80705e-239
NR4A3	31490.2	-2.28719	0.0692715	-33.0177	4.52552e-239	4.65385e-238
NBL1	153.649	-2.34779	0.0711929	-32.9779	1.68352e-238	1.72692e-237
ZNF200	441.822	-0.893171	0.027108	-32.9486	4.43052e-238	4.53623e-237
LRRC8C	2507.47	0.965153	0.0292929	32.9484	4.46216e-238	4.56578e-237
TRGC2	135.616	-3.08317	0.0935826	-32.946	4.8239e-238	4.93283e-237
PSEN2	740.762	0.722134	0.021933	32.9245	9.79316e-238	1.00081e-236
CD200R1	1787.29	1.57888	0.0479598	32.921	1.1005e-237	1.12395e-236
XLOC_002712	213.562	-1.65929	0.0504198	-32.9094	1.61084e-237	1.64414e-236
TIAM2	370.765	-0.96419	0.0293097	-32.8967	2.45323e-237	2.50083e-236
SDHC	1399.13	0.548528	0.0166762	32.8929	2.7769e-237	2.82902e-236
C15orf38-AP3S2	3554.86	1.10593	0.0336291	32.8862	3.46549e-237	3.52615e-236
TXNL1	916.471	-0.478519	0.0145516	-32.8842	3.69884e-237	3.76126e-236
CXCR4	1974.86	-2.14597	0.065322	-32.8521	1.06246e-236	1.07838e-235
SIK3	855.431	-0.835046	0.0254193	-32.8509	1.10736e-236	1.12326e-235
HS3ST3A1	32.5349	-6.10776	0.185948	-32.8467	1.27134e-236	1.288e-235
GLB1	2960.16	0.728194	0.0221834	32.826	2.50386e-236	2.5351e-235
ZNF385A	1742.13	1.4439	0.0439865	32.8259	2.5148e-236	2.54461e-235
JMJD6	409.905	-0.618336	0.0188462	-32.8097	4.28538e-236	4.33082e-235
LRIF1	856.558	-0.85354	0.0260233	-32.799	6.08329e-236	6.14401e-235
PAFAH1B2	1592.89	0.374393	0.0114192	32.7863	9.2398e-236	9.32628e-235
EPT1	1313.74	-0.838294	0.0255701	-32.7841	9.92564e-236	1.00124e-234
ZBTB33	1065.92	0.456758	0.0139346	32.7787	1.18416e-235	1.19377e-234
COA3	227.967	0.594011	0.0181225	32.7776	1.22827e-235	1.23748e-234
GMPR2	1450.94	0.444699	0.0135693	32.7724	1.45803e-235	1.46806e-234
MCL1	15355.7	-0.508404	0.0155139	-32.7709	1.53195e-235	1.54154e-234
SKIV2L	909.254	-0.636337	0.0194336	-32.7442	3.67478e-235	3.69552e-234
SLC9A6	961.577	0.466025	0.0142333	32.7419	3.96319e-235	3.98311e-234
XLOC_005608	29.0374	-5.72188	0.174859	-32.7228	7.40492e-235	7.43759e-234
TMEM230	1105.27	0.508442	0.0155481	32.7012	1.50174e-234	1.50652e-233
AGPAT2	546.336	0.667114	0.0204079	32.689	2.23694e-234	2.24268e-233
INO80C	166.02	-0.711169	0.021775	-32.6599	5.8074e-234	5.81876e-233
SLCO2B1	10054.3	1.72965	0.0529999	32.635	1.30807e-233	1.30823e-232
RBM25	2195.07	-0.466127	0.0142876	-32.6246	1.8389e-233	1.838e-232
RASA3	682.936	1.46701	0.0449916	32.6064	3.32541e-233	3.31974e-232
CCL1	143.201	-3.13606	0.0961978	-32.6001	4.08482e-233	4.07537e-232
LOC100505474	28.4152	-2.87696	0.08826	-32.5964	4.60774e-233	4.59428e-232
BLVRB	1093.46	1.27328	0.0390818	32.5798	7.91476e-233	7.88206e-232
FAM49A	3679.44	-1.4089	0.0432478	-32.5773	8.59518e-233	8.55448e-232
AMDHD2	288.566	1.42759	0.043825	32.5749	9.31415e-233	9.26441e-232
SRRM1	1465.15	-0.493297	0.0151589	-32.5417	2.74172e-232	2.72378e-231
CLP1	354.102	0.468208	0.0143891	32.539	2.99822e-232	2.97679e-231
ATG16L1	445.891	-0.810943	0.0249223	-32.5389	3.00822e-232	2.98491e-231
PPP2R5C	2503.82	0.617798	0.0189938	32.5263	4.53645e-232	4.49586e-231
SRSF11	2267.46	-0.467694	0.0143793	-32.5256	4.63818e-232	4.5939e-231
MED1	1429.43	-0.467077	0.0143859	-32.4677	3.04421e-231	3.00788e-230
USP7	2248.19	0.377368	0.0116273	32.4555	4.53573e-231	4.4789e-230
GNPDA1	1171.77	1.21496	0.0374468	32.4451	6.35844e-231	6.27121e-230
LOC100271836	656.816	-0.990687	0.0305452	-32.4335	9.26501e-231	9.13241e-230
TMEM203	206.908	0.821075	0.0253187	32.4296	1.0511e-230	1.03544e-229
USP4	1683.67	0.358848	0.0110684	32.421	1.38658e-230	1.36509e-229
SLC36A1	1151.91	1.57847	0.0486892	32.4192	1.47252e-230	1.44883e-229
DOCK11	2707.55	0.596874	0.0184189	32.4056	2.2903e-230	2.24941e-229
ARHGAP17	1913.72	0.843897	0.026048	32.3978	2.94739e-230	2.89303e-229
SCARB1	3603.48	1.47688	0.0456041	32.3848	4.49159e-230	4.40611e-229
VANGL1	468.882	1.17311	0.0362579	32.3547	1.19169e-229	1.16622e-228
MYO5A	4327.29	0.771922	0.023884	32.3196	3.71449e-229	3.63293e-228
TOM1	949.29	-1.34848	0.0417328	-32.3123	4.69738e-229	4.5915e-228
MXD4	299.38	1.43892	0.0445342	32.3105	4.98041e-229	4.86525e-228
MGAT2	1824.58	-0.456912	0.0141526	-32.2848	1.14512e-228	1.11798e-227
SDCCAG8	536.376	-0.649274	0.0201292	-32.2553	2.96253e-228	2.89058e-227
C14orf119	1360.64	0.646916	0.0200633	32.2437	4.30957e-228	4.2024e-227
DCTN2	1217.03	0.428996	0.0133113	32.228	7.15224e-228	6.97025e-227
SLC7A1	715.633	-1.37582	0.0427024	-32.2189	9.60023e-228	9.35038e-227
CCL3L1	3307.9	-6.86631	0.213359	-32.1819	3.1647e-227	3.08051e-226
MATK	422.26	-1.42506	0.044286	-32.1785	3.52326e-227	3.4275e-226
UBE2Q1	1627.35	-0.261886	0.00813957	-32.1744	4.02334e-227	3.91166e-226
LOC100130476	123.826	-1.41511	0.0440047	-32.1582	6.79093e-227	6.59461e-226
COG2	369.308	0.643078	0.0200102	32.1376	1.31651e-226	1.27694e-225
PPM1B	2102.15	-0.651779	0.0202861	-32.1293	1.72112e-226	1.6684e-225
IL18RAP	105.656	-3.74775	0.116676	-32.1211	2.23945e-226	2.16957e-225
SH2B3	4172.87	-0.710132	0.0221316	-32.0868	6.74121e-226	6.51929e-225
PYGO2	340.867	0.814727	0.0253974	32.0791	8.62698e-226	8.33315e-225
WAS	740.699	0.753149	0.0234817	32.0738	1.02247e-225	9.87064e-225
WWP1	920.508	1.33738	0.041704	32.0683	1.22175e-225	1.17875e-224
KCNK6	1918.04	0.976396	0.0304886	32.0249	4.90868e-225	4.72478e-224
ABTB1	168.495	1.16156	0.0362733	32.0225	5.29966e-225	5.09812e-224
CUL3	1136.06	0.38033	0.0118867	31.9962	1.2309e-224	1.18271e-223
GPBAR1	197.041	2.7965	0.0874224	31.9883	1.58456e-224	1.52162e-223
ATRIP	1462.9	0.826113	0.0258287	31.9843	1.80172e-224	1.72914e-223
CELF2	4055.23	-0.991289	0.0309939	-31.9833	1.85845e-224	1.78255e-223
HIST2H2BF	354.009	-1.55533	0.0486422	-31.9748	2.43997e-224	2.33758e-223
HHEX	251.259	1.49399	0.0467292	31.9713	2.73448e-224	2.6182e-223
SF3A1	2633.24	-0.520656	0.0162856	-31.9704	2.81311e-224	2.69191e-223
VPS45	707.173	0.76014	0.0237799	31.9657	3.27083e-224	3.12809e-223
CBX4	698.162	-1.00374	0.031413	-31.9529	4.91792e-224	4.69235e-223
ATXN7	1740.78	-0.650474	0.02036	-31.9486	5.64822e-224	5.38601e-223
METTL23	213.732	0.506636	0.0158645	31.9351	8.68742e-224	8.27931e-223
CSF1	4087.26	-2.10155	0.0658197	-31.9289	1.06057e-223	1.01016e-222
GARS	2081.64	-0.594443	0.0186296	-31.9085	2.03598e-223	1.93583e-222
GRHL1	187.777	-2.23633	0.0700911	-31.9061	2.19834e-223	2.08899e-222
AK001351	318.037	-2.78702	0.0873652	-31.9008	2.60126e-223	2.46902e-222
LARP1	3121.23	0.701898	0.0220177	31.8788	5.25897e-223	4.98583e-222
MTHFD2	6071.57	-0.721095	0.0226299	-31.8647	8.23973e-223	7.80275e-222
ADAM10	2304.11	0.453014	0.0142203	31.8568	1.0593e-222	1.00254e-221
OFD1	321.174	-0.828382	0.0260097	-31.849	1.35866e-222	1.28438e-221
TPCN1	804.543	1.65692	0.05203	31.8454	1.52372e-222	1.43959e-221
CYCS	2852.95	-0.867219	0.0272495	-31.8251	2.91365e-222	2.75119e-221
FXR2	621.648	-0.463118	0.0145529	-31.8231	3.10534e-222	2.9305e-221
UBP1	3047.69	0.442227	0.0138998	31.8153	3.9806e-222	3.75431e-221
IL6ST	4897.25	-1.11988	0.0352024	-31.8125	4.35175e-222	4.102e-221
PYGB	1450.75	0.645764	0.0202994	31.8119	4.43457e-222	4.17767e-221
TLR3	1098.97	1.31295	0.041279	31.8067	5.22846e-222	4.92274e-221
RFXAP	153.352	1.53045	0.0481422	31.7902	8.83529e-222	8.31389e-221
KPNA2	2280.05	-0.949851	0.0299031	-31.7643	2.01726e-221	1.89278e-220
MED15	1301.9	-0.517798	0.0163013	-31.7642	2.02254e-221	1.89665e-220
FLYWCH1	275.382	1.03037	0.0324539	31.7489	3.29015e-221	3.08007e-220
CLK4	282.321	-0.95551	0.0300966	-31.7481	3.36915e-221	3.15223e-220
CALM1	15156.2	-0.756277	0.0238216	-31.7475	3.43285e-221	3.21e-220
GGA3	866.172	0.41936	0.0132133	31.7378	4.67963e-221	4.37335e-220
PYROXD1	190.926	-0.738221	0.023267	-31.7283	6.32843e-221	5.91087e-220
FAM134C	732.144	0.551913	0.0174057	31.7088	1.17438e-220	1.09565e-219
SRD5A3-AS1	50.7062	-2.45779	0.0775274	-31.7022	1.45088e-220	1.35284e-219
ECI2	345.451	1.00299	0.0316393	31.7007	1.5189e-220	1.41545e-219
SNX11	1696.06	-1.12789	0.0355975	-31.6845	2.54016e-220	2.36581e-219
LAMTOR4	580.972	0.528639	0.0167011	31.6528	6.92997e-220	6.44334e-219
TNFAIP8L2-SCNM1	943.576	0.496766	0.0156965	31.6482	8.0276e-220	7.45966e-219
C10orf105	137.701	3.1798	0.100497	31.6406	1.02028e-219	9.47563e-219
HIPK1	2632.03	0.348395	0.0110111	31.6403	1.02978e-219	9.55839e-219
TBL1X	999.659	0.759852	0.024031	31.6196	1.98695e-219	1.84324e-218
MGST2	296.029	0.936841	0.0296472	31.5996	3.7383e-219	3.46596e-218
PRMT2	1524.79	0.546436	0.0172928	31.599	3.81271e-219	3.53295e-218
RNF138	1604.96	-0.563901	0.0178801	-31.5379	2.62393e-218	2.42454e-217
NRAS	2140.02	-0.598836	0.0189886	-31.5366	2.73723e-218	2.52782e-217
LYRM1	494.484	-1.066	0.0338244	-31.5158	5.28351e-218	4.87105e-217
LRFN4	164.784	1.212	0.038458	31.5149	5.42227e-218	4.99617e-217
PAPD7	2482.09	-0.728885	0.0231427	-31.4952	1.01094e-217	9.30974e-217
ATG9A	697.987	0.709836	0.0225579	31.4673	2.43068e-217	2.2359e-216
C2orf47	207.511	-0.560468	0.0178253	-31.4423	5.34717e-217	4.91041e-216
PSME4	1554.95	-0.37423	0.0119073	-31.4286	8.23782e-217	7.56071e-216
SUMO3	1744.81	0.370034	0.0117761	31.4224	1.0013e-216	9.17971e-216
METTL21D	91.9584	-1.19771	0.0381441	-31.3997	2.04567e-216	1.87124e-215
LIMD1	1291.18	0.766967	0.0244305	31.3938	2.4605e-216	2.24819e-215
TAF2	689.621	-0.523923	0.0166982	-31.3759	4.31021e-216	3.9339e-215
MYO9A	481.701	0.596304	0.0190123	31.3642	6.23843e-216	5.68745e-215
TANK	3990.61	-0.909361	0.0289994	-31.3579	7.59588e-216	6.92116e-215
FLVCR2	1461.78	1.10919	0.0354551	31.2843	7.64124e-215	6.9509e-214
UPP1	757.525	-1.04164	0.0333166	-31.265	1.39767e-214	1.26999e-213
PPARD	747.701	-1.54249	0.0493473	-31.2579	1.74116e-214	1.58123e-213
KIAA1432	3188.38	0.788608	0.0252299	31.2569	1.80163e-214	1.63523e-213
BPGM	867.672	-1.01672	0.0325544	-31.2315	3.97915e-214	3.60964e-213
SIRT1	803.818	-0.646818	0.0207133	-31.2271	4.56435e-214	4.13821e-213
TNFRSF1A	3618.12	0.854994	0.0273828	31.2238	5.072e-214	4.59592e-213
HSPA13	797.439	-0.94952	0.0304355	-31.1977	1.14327e-213	1.03481e-212
C17orf96	2177.22	-1.73501	0.0556295	-31.1886	1.51892e-213	1.37407e-212
ATRAID	823.84	0.50868	0.0163099	31.1883	1.53342e-213	1.38642e-212
ISG20	5962.57	-0.923989	0.0296359	-31.1781	2.11282e-213	1.90923e-212
PTGER3	1239.35	-2.58326	0.0828742	-31.1709	2.64588e-213	2.38829e-212
KAT8	529.499	0.551653	0.0176988	31.169	2.80427e-213	2.52986e-212
RIN2	7241.91	-1.85337	0.0594674	-31.1662	3.06303e-213	2.76178e-212
MAN1B1	847.134	0.742542	0.0238299	31.1601	3.70295e-213	3.33693e-212
TLK2	1459.92	-0.338314	0.0108577	-31.1589	3.8415e-213	3.45988e-212
PGAP2	181.243	-1.14905	0.0369002	-31.1393	7.08137e-213	6.3709e-212
AMZ2P1	167.097	-1.74006	0.0558875	-31.1351	8.07093e-213	7.25719e-212
IFNGR2	4224.13	-1.04463	0.03357	-31.118	1.37495e-212	1.23497e-211
KCNE3	442.623	1.63163	0.0524513	31.1075	1.90867e-212	1.71342e-211
KIAA1468	640.736	0.378267	0.0121601	31.1072	1.9275e-212	1.72937e-211
SLC29A3	337.82	1.61349	0.0518825	31.099	2.48779e-212	2.23085e-211
NINJ1	6774.32	-1.49802	0.0481876	-31.0873	3.57429e-212	3.20162e-211
PTGER2	1924.87	-1.78455	0.0574233	-31.0771	4.91481e-212	4.39998e-211
SCAMP4	615.211	0.699145	0.0225091	31.0605	8.23091e-212	7.36067e-211
MAPKAPK3	2859.56	0.734946	0.0236648	31.0565	9.32486e-212	8.33441e-211
RHOB	232.53	-2.21808	0.0714383	-31.0488	1.18333e-211	1.05649e-210
RXRB	497.325	0.502323	0.0161819	31.0423	1.45125e-211	1.29498e-210
CD80	6664.71	-1.31386	0.0423381	-31.0327	1.95577e-211	1.74329e-210
MRPS23	333.923	0.665872	0.0214695	31.0149	3.39725e-211	3.02651e-210
ALDH3A2	966.308	1.15068	0.0371082	31.0087	4.11497e-211	3.66391e-210
CALCOCO1	781.635	0.793498	0.025599	30.9972	5.88878e-211	5.24044e-210
NPEPL1	272.427	0.905134	0.0292138	30.9831	9.10587e-211	8.09894e-210
DOT1L	545.945	-1.45604	0.0469948	-30.983	9.13306e-211	8.11872e-210
PAX3	44.1822	-2.28381	0.0737207	-30.9792	1.0281e-210	9.13423e-210
XLOC_008681	222.643	1.73495	0.0560253	30.9673	1.48767e-210	1.32101e-209
RCAN3	543.724	0.756997	0.0244487	30.9626	1.7168e-210	1.52365e-209
NRBP1	4061.97	-0.614591	0.019852	-30.9586	1.94649e-210	1.72656e-209
DCTD	883.655	0.384172	0.0124353	30.8938	1.44873e-209	1.28089e-208
IFNA4	26.0698	-9.54018	0.308854	-30.8889	1.68123e-209	1.48565e-208
PDK2	139.305	1.47398	0.0477277	30.8832	2.00804e-209	1.77253e-208
YY1AP1	1485.68	-0.56565	0.0183179	-30.8796	2.24281e-209	1.97869e-208
DBF4	229.997	-1.32662	0.0429914	-30.8579	4.39444e-209	3.8707e-208
FBXL5	2221.91	-0.706162	0.0228931	-30.8461	6.31811e-209	5.55912e-208
SLC30A7	1309.21	-0.658978	0.0213747	-30.8297	1.04677e-208	9.20037e-208
SNX17	1802.48	0.646902	0.0209871	30.8238	1.2577e-208	1.10484e-207
LRRC47	349.393	0.515988	0.0167401	30.8235	1.26873e-208	1.11393e-207
GPR34	132.845	2.65883	0.0862945	30.8112	1.85656e-208	1.62829e-207
CDK17	1096.69	-0.38496	0.0125026	-30.7904	3.52178e-208	3.08711e-207
THAP1	279.204	-0.505402	0.0164166	-30.7861	4.02561e-208	3.52311e-207
TAP1	17788.4	-0.526348	0.0170978	-30.7846	4.21154e-208	3.68386e-207
PAPD4	9001.52	-0.763371	0.0248027	-30.7778	5.19759e-208	4.54152e-207
ALG2	856.232	-0.692447	0.0224999	-30.7756	5.56072e-208	4.85622e-207
PPA1	2748.35	-0.950573	0.03089	-30.7728	6.06106e-208	5.29035e-207
UBR2	1840.93	0.422616	0.0137355	30.7681	7.01314e-208	6.11812e-207
ZDHHC3	832.24	0.395143	0.012844	30.7648	7.75677e-208	6.76324e-207
RIC8A	1142.53	0.422047	0.0137208	30.7597	9.07255e-208	7.90629e-207
LYN	14167.4	-0.694824	0.0225984	-30.7466	1.35821e-207	1.18299e-206
TMCO3	864.349	0.680722	0.022151	30.731	2.19649e-207	1.9121e-206
BAZ1A	10059.7	-0.535483	0.0174302	-30.7216	2.93266e-207	2.5516e-206
ACTR1A	2059.64	0.281842	0.00917538	30.7171	3.36044e-207	2.9207e-206
C9orf123	242.247	0.880241	0.0286602	30.713	3.81717e-207	3.31414e-206
CHID1	1141.98	1.01748	0.0331371	30.7052	4.85535e-207	4.21105e-206
SLC2A8	149.465	1.37669	0.0448456	30.6984	5.97245e-207	5.17717e-206
DAXX	1565.07	-0.428019	0.0139448	-30.6939	6.87522e-207	5.95344e-206
HSP90AA1	27360.5	-0.421696	0.0137649	-30.6356	4.11359e-206	3.55643e-205
USP22	1909.8	0.378544	0.0123689	30.6044	1.06912e-205	9.22373e-205
HNRNPUL2-BSCL2	4893.06	0.467741	0.015284	30.6034	1.10269e-205	9.50834e-205
GAS2L1	280.128	0.811782	0.0265369	30.5907	1.62907e-205	1.40324e-204
GLS	5970.05	-0.586856	0.0191909	-30.58	2.2591e-205	1.94389e-204
ADM	775.002	-1.51544	0.0495617	-30.5767	2.49661e-205	2.14714e-204
UBE2S	1222.37	-0.790314	0.0258578	-30.5638	3.70338e-205	3.18165e-204
GIPC1	452.605	0.739521	0.0242125	30.543	7.00915e-205	6.01539e-204
IQSEC2	643.834	0.749975	0.0245582	30.5387	7.99911e-205	6.85781e-204
CAPRIN2	263.198	1.14587	0.0375266	30.5348	8.99083e-205	7.70401e-204
TBC1D22A	992.048	0.613998	0.0201093	30.533	9.49504e-205	8.12331e-204
QSER1	2290.1	0.515761	0.0169054	30.5087	2.00044e-204	1.71054e-203
PSME2	5724.56	-0.575663	0.018879	-30.4923	3.29659e-204	2.81447e-203
RBM47	3991.47	-0.814845	0.0267392	-30.4738	5.80554e-204	4.94875e-203
CDC27	2303.35	-0.476256	0.0156383	-30.4545	1.04431e-203	8.89265e-203
EHMT2	504.58	0.964033	0.0316572	30.4522	1.11884e-203	9.52232e-203
AP2M1	10057.6	0.589534	0.0193613	30.4492	1.22805e-203	1.04464e-202
CBR1	3137.9	0.902667	0.0296612	30.4326	2.03441e-203	1.72877e-202
CAMK1G	154.565	-2.68736	0.0883065	-30.4322	2.06174e-203	1.75109e-202
SCAF11	3864.92	0.35749	0.0117511	30.4218	2.82989e-203	2.40226e-202
FAM115A	741.561	0.613648	0.0201723	30.4203	2.96e-203	2.5114e-202
RNF220	572.458	0.566207	0.0186215	30.4061	4.56189e-203	3.86852e-202
ATP1B3	3422.66	-0.759904	0.0249987	-30.3977	5.88408e-203	4.98717e-202
ZFP69	185.325	1.22555	0.040319	30.3964	6.12963e-203	5.19261e-202
ZNF780B	159.721	0.868766	0.0285851	30.3923	6.95203e-203	5.8832e-202
SESTD1	741.771	-0.715945	0.023559	-30.3894	7.58225e-203	6.41322e-202
MOGS	687.454	0.569475	0.0187395	30.389	7.68157e-203	6.49388e-202
TAZ	231.295	0.771648	0.0254146	30.3624	1.72505e-202	1.45682e-201
OCEL1	68.8084	1.10805	0.0365001	30.3574	2.00436e-202	1.69097e-201
SDCBP	19933.6	-0.78886	0.0260258	-30.3107	8.29605e-202	6.99172e-201
RAB4A	418.585	0.575265	0.0189926	30.2889	1.60545e-201	1.35234e-200
FAM177A1	2357.88	-0.800457	0.0264484	-30.2649	3.32087e-201	2.79587e-200
ARHGEF17	1248.6	1.0245	0.0338531	30.263	3.51517e-201	2.95794e-200
TNPO3	1359.32	0.369826	0.0122241	30.2539	4.63103e-201	3.89092e-200
SLC37A4	291.527	0.779858	0.0257774	30.2535	4.68938e-201	3.93792e-200
GPR157	554.941	-2.24087	0.0740726	-30.2524	4.8545e-201	4.0745e-200
KIAA0196	1205.27	0.446595	0.0147777	30.2209	1.2579e-200	1.05363e-199
XLOC_005960	51.9298	1.23794	0.0409886	30.2021	2.22612e-200	1.86272e-199
UBASH3B	697.709	-1.26234	0.0418	-30.1995	2.4063e-200	2.01245e-199
PHF3	1814.28	0.431477	0.0142894	30.1957	2.70012e-200	2.25703e-199
RBM10	691.172	-0.418611	0.0138647	-30.1927	2.95513e-200	2.46893e-199
TOX4	1987.4	-0.577309	0.0191273	-30.1825	4.02146e-200	3.35641e-199
APC	1974.38	0.480431	0.0159188	30.1802	4.31308e-200	3.59797e-199
SFXN3	1678.41	0.764973	0.0253754	30.1463	1.19932e-199	9.98946e-199
MRFAP1L1	465.675	0.675466	0.0224109	30.1401	1.44746e-199	1.20502e-198
DKK2	76.824	-4.44493	0.147531	-30.1289	2.02766e-199	1.68632e-198
ABCA7	632.317	1.18456	0.0393256	30.1219	2.50629e-199	2.08332e-198
PGAM1	6115.72	-0.467476	0.0155241	-30.113	3.27678e-199	2.7224e-198
SKIL	1228.92	-1.03989	0.0345407	-30.1062	4.02412e-199	3.33992e-198
FBRS	1509.75	-0.578748	0.0192268	-30.1011	4.69397e-199	3.89391e-198
MED13L	3090.58	-0.58942	0.0195843	-30.0966	5.36912e-199	4.44723e-198
RIPK3	638.498	0.537286	0.0178566	30.0888	6.7851e-199	5.6144e-198
CIITA	6028.8	0.840792	0.0279586	30.0728	1.10089e-198	9.10483e-198
MRPL43	226.7	0.621984	0.020699	30.0489	2.25534e-198	1.86057e-197
DDX26B	717.467	-0.608644	0.0202554	-30.0485	2.28212e-198	1.88172e-197
IL1R1	2748.85	-1.25001	0.0416204	-30.0337	3.56842e-198	2.94085e-197
CHSY1	1527.27	-0.625497	0.0208306	-30.0278	4.25958e-198	3.50869e-197
NUDCD3	506.19	0.629761	0.0209866	30.0077	7.77751e-198	6.40004e-197
MOAP1	280.867	0.617646	0.0205858	30.0035	8.83181e-198	7.26397e-197
NDUFC2-KCTD14	983.178	0.502668	0.0167557	29.9999	9.85146e-198	8.09856e-197
C2CD2L	969.099	0.614343	0.0204852	29.9896	1.34059e-197	1.1015e-196
SLA	6623.44	-0.631142	0.0210528	-29.9789	1.84681e-197	1.51592e-196
GPAA1	673.472	0.616994	0.020592	29.9627	3.00242e-197	2.46324e-196
XLOC_003497	15.6846	-9.43929	0.315104	-29.9561	3.66339e-197	3.00402e-196
ZNF516	1693.41	0.98964	0.0330387	29.954	3.90336e-197	3.19759e-196
GABARAP	4376.87	0.380882	0.0127175	29.9495	4.46168e-197	3.65314e-196
R3HCC1L	681.893	-0.369726	0.0123531	-29.9298	8.05513e-197	6.58881e-196
LRRC8D	715.609	0.595899	0.0199111	29.928	8.51627e-197	6.96253e-196
FAM13B	2193.58	-0.600402	0.020064	-29.9244	9.48059e-197	7.74705e-196
SPSB3	260.759	0.672731	0.0224874	29.9159	1.22113e-196	9.96855e-196
CDCP1	341.266	1.62273	0.0542868	29.8918	2.51333e-196	2.04663e-195
SMG9	687.055	-0.583757	0.0195426	-29.871	4.68004e-196	3.80721e-195
ATP6V1C1	2627.86	-0.869547	0.0291157	-29.8653	5.56289e-196	4.52092e-195
PTPRD	23.2456	-3.3437	0.111963	-29.8643	5.73215e-196	4.65616e-195
CEP170	3737.96	-0.647101	0.0216716	-29.8594	6.62191e-196	5.37358e-195
CCNY	1283.58	0.620206	0.0207858	29.838	1.25659e-195	1.0192e-194
GANC	822.454	0.59392	0.0199051	29.8376	1.27241e-195	1.03152e-194
CTDSP1	917.96	0.705522	0.0236563	29.8239	1.91589e-195	1.55241e-194
MEGF9	1024.74	-1.03357	0.0346867	-29.7971	4.25686e-195	3.44585e-194
TET2	3448.07	-0.682187	0.0228951	-29.7962	4.38013e-195	3.54389e-194
TIMMDC1	3144	-0.897055	0.0301187	-29.784	6.29406e-195	5.0899e-194
MAP4K5	593.298	-0.759792	0.0255224	-29.7696	9.68156e-195	7.82545e-194
MARVELD1	270.442	1.27642	0.0428771	29.7693	9.76087e-195	7.88567e-194
CCNB1	351.912	-1.57422	0.0529014	-29.7576	1.3836e-194	1.11724e-193
TRAPPC10	1983.35	-0.266252	0.00894824	-29.7547	1.50742e-194	1.21663e-193
ELOVL1	1722.76	0.460264	0.0154724	29.7474	1.87473e-194	1.51233e-193
PLXND1	4006.81	0.810194	0.0272443	29.7381	2.47296e-194	1.99394e-193
2018-03-05	758.959	-0.508364	0.0170989	-29.7309	3.06612e-194	2.47098e-193
TEP1	2399.39	0.58458	0.0196628	29.7302	3.12302e-194	2.51561e-193
GUSBP3	2085.8	1.62815	0.0547718	29.726	3.54074e-194	2.84928e-193
NELFB	631.129	0.493682	0.0166107	29.7207	4.15286e-194	3.34022e-193
SPRED2	1955.97	-2.39994	0.0807636	-29.7156	4.82924e-194	3.88234e-193
AFTPH	2330.74	-0.509839	0.017161	-29.7092	5.84877e-194	4.69966e-193
TTC39B	2102.19	-1.51436	0.0509735	-29.7087	5.92454e-194	4.75821e-193
CALCRL	1683.55	-2.30481	0.077654	-29.6805	1.36919e-193	1.09749e-192
TNFRSF1B	1564.01	1.05647	0.0356108	29.6672	2.03658e-193	1.63165e-192
RNF213	87733.4	0.66727	0.0224929	29.6659	2.11654e-193	1.69489e-192
VAMP8	2803.58	0.697586	0.0235183	29.6614	2.41594e-193	1.93276e-192
PLEKHO2	6519.99	0.694279	0.0234227	29.6413	4.39102e-193	3.50939e-192
PPP6R3	1292.04	-0.401919	0.0135609	-29.638	4.83534e-193	3.86074e-192
CAMSAP2	2138.46	-0.842251	0.0284213	-29.6345	5.36928e-193	4.28497e-192
SUN1	541.088	0.596617	0.0201329	29.634	5.45212e-193	4.34896e-192
EXOC3	587.761	0.538755	0.0181868	29.6233	7.48425e-193	5.96701e-192
PREPL	356.098	0.974286	0.032911	29.6036	1.34177e-192	1.06665e-191
ABHD6	262.452	0.825816	0.0279032	29.5957	1.69588e-192	1.3475e-191
HCLS1	5066.07	0.407285	0.0137632	29.5923	1.87745e-192	1.49104e-191
SGK223	1125.89	-1.1396	0.0385168	-29.5872	2.18557e-192	1.73491e-191
PDLIM5	1753.72	-0.540481	0.0182719	-29.5799	2.71012e-192	2.14818e-191
TOB2	1081.54	-0.597253	0.0201924	-29.5781	2.85502e-192	2.26084e-191
LARP4B	2497.99	-0.368574	0.0124643	-29.5705	3.58151e-192	2.83477e-191
TBC1D22B	701.429	-0.420948	0.0142456	-29.5494	6.68746e-192	5.29058e-191
EOGT	766.31	0.712027	0.0240967	29.5487	6.83096e-192	5.4015e-191
CDS2	3030.75	0.548166	0.0185555	29.5419	8.33415e-192	6.58377e-191
EME1	1264.86	-0.487101	0.0164969	-29.5268	1.30388e-191	1.02904e-190
ZNF32	149.854	0.778884	0.0263819	29.5235	1.43825e-191	1.13345e-190
SMOX	250.351	-1.81281	0.06141	-29.5197	1.6076e-191	1.26631e-190
RNPEPL1	1312.38	0.679693	0.0230386	29.5023	2.69001e-191	2.1179e-190
IL2RA	992.718	-2.58542	0.0876407	-29.5003	2.85716e-191	2.24842e-190
ADPRH	1768.1	-0.725864	0.0246096	-29.4952	3.32036e-191	2.61042e-190
NEIL2	74.446	0.980531	0.0332689	29.4729	6.41008e-191	5.02987e-190
ZNF101	565.735	-0.882596	0.0299574	-29.4617	8.92144e-191	6.99714e-190
SLC35A1	335.683	0.616945	0.0209527	29.4447	1.47229e-190	1.15417e-189
TSPAN15	1088.9	1.58507	0.0538684	29.4249	2.6393e-190	2.06804e-189
HMGCS1	2779.41	-1.32191	0.0449355	-29.4179	3.23859e-190	2.53641e-189
ATG16L2	449.182	1.30648	0.0444225	29.4102	4.06657e-190	3.18182e-189
ZNF189	642.112	-0.680132	0.0231298	-29.405	4.74335e-190	3.70959e-189
DPP8	1048.03	0.324218	0.0110296	29.3954	6.29457e-190	4.91804e-189
KDM1A	1112.82	0.660789	0.0224915	29.3795	1.00523e-189	7.8503e-189
DIRC3	22.4148	-2.34495	0.0798267	-29.3755	1.12782e-189	8.79922e-189
TDRKH	1323.51	0.767274	0.0261297	29.364	1.58131e-189	1.23315e-188
SRGAP2D	2446.04	-0.604147	0.0205824	-29.3526	2.2132e-189	1.7251e-188
BANP	401.15	-1.6024	0.0545967	-29.3497	2.41108e-189	1.87844e-188
CARM1	1817.92	0.646654	0.0220367	29.3445	2.81102e-189	2.18795e-188
ANP32A	1536.56	0.921872	0.031423	29.3374	3.45592e-189	2.68863e-188
ARNTL2	1326.66	-0.663786	0.0226339	-29.327	4.6966e-189	3.65039e-188
FNIP2	5055.99	-1.09408	0.0373179	-29.3177	6.16313e-189	4.78116e-188
DRAM1	5146.31	-1.79084	0.0611245	-29.2983	1.09105e-188	8.45599e-188
FAM168A	440.51	1.21935	0.0416513	29.2752	2.14493e-188	1.66161e-187
PDCD6	836.378	0.577744	0.019739	29.2691	2.56326e-188	1.9838e-187
ATM	1957.72	0.671335	0.0229519	29.2496	4.54322e-188	3.50954e-187
RREB1	1548.86	0.470278	0.0160805	29.2452	5.16675e-188	3.98933e-187
MKRN1	2457.45	0.475473	0.0162594	29.243	5.5112e-188	4.25328e-187
CLEC4E	652.749	-2.92035	0.0998833	-29.2376	6.45976e-188	4.98299e-187
RAPGEF6	1320.43	-0.526562	0.0180116	-29.2346	7.03945e-188	5.4276e-187
MPHOSPH6	288.08	-0.832214	0.02848	-29.2211	1.04755e-187	8.05796e-187
UBAP2L	4597.77	-0.49611	0.0169795	-29.2181	1.14111e-187	8.77349e-187
POLR3GL	376.014	0.631265	0.0216111	29.2103	1.43614e-187	1.10367e-186
FURIN	7526.64	1.28435	0.0440128	29.1812	3.35972e-187	2.57951e-186
XLOC_008999	12.2863	-8.81283	0.302283	-29.1542	7.38817e-187	5.6698e-186
ZDHHC7	1347.02	0.619535	0.0212562	29.1461	9.37247e-187	7.18585e-186
NAA20	865.804	0.510743	0.0175298	29.1357	1.26705e-186	9.70988e-186
CRYL1	478.063	0.966453	0.0332139	29.0979	3.81897e-186	2.92389e-185
PARP4	9752.06	0.646956	0.0222395	29.0904	4.74235e-186	3.62747e-185
SPAG1	51.1753	-1.12238	0.0385864	-29.0873	5.19762e-186	3.972e-185
GRIPAP1	2090.67	-0.439367	0.0151067	-29.0843	5.67605e-186	4.33559e-185
DAGLA	854.855	-0.976691	0.0335875	-29.079	6.61284e-186	5.0488e-185
ZBTB44	600.744	0.825905	0.0284217	29.0589	1.18635e-185	9.04917e-185
NFIX	472.208	-1.14863	0.0395293	-29.0578	1.22614e-185	9.34829e-185
SMIM14	841.25	1.06269	0.0365978	29.0371	2.23918e-185	1.70482e-184
STX7	1676.02	0.704508	0.0242787	29.0175	3.95282e-185	3.0081e-184
PDLIM2	230.794	1.39249	0.048001	29.0097	4.96234e-185	3.7746e-184
RAP2C	1553.83	-0.532535	0.0183632	-29.0001	6.5671e-185	4.99063e-184
GOLIM4	680.609	0.548294	0.0189092	28.9961	7.35961e-185	5.58771e-184
NDP	101.124	-3.308	0.114129	-28.9848	1.02296e-184	7.75953e-184
CLDN1	5229.02	-3.00362	0.103689	-28.9675	1.68892e-184	1.27934e-183
MTIF3	326.584	0.453304	0.0156503	28.9645	1.84136e-184	1.39416e-183
SLC35F6	849.054	0.760048	0.026242	28.9631	1.92188e-184	1.45311e-183
HLA-G	35002.2	-0.726377	0.0250803	-28.962	1.98023e-184	1.49654e-183
MAF	3210.73	2.1071	0.0727559	28.9612	2.02541e-184	1.52998e-183
CALML4	167.736	0.743823	0.0256866	28.9576	2.25125e-184	1.69979e-183
ANKFY1	4813	0.428045	0.0147874	28.9465	3.10274e-184	2.34163e-183
SMA	1207	1.7495	0.0604503	28.9411	3.629e-184	2.73627e-183
CREB5	1665.27	-1.45349	0.0502374	-28.9324	4.67451e-184	3.52297e-183
BLNK	942.355	0.928166	0.0320826	28.9305	4.94102e-184	3.72211e-183
ZNF252P	228.384	0.642396	0.022214	28.9186	6.97836e-184	5.25445e-183
MLLT10	737.344	-0.675141	0.023354	-28.909	9.20302e-184	6.92317e-183
TMEM140	1889.76	-1.12039	0.0387579	-28.9075	9.61796e-184	7.232e-183
HCAR1	3270.48	-2.0692	0.0716037	-28.8979	1.26758e-183	9.5225e-183
KEAP1	1306.17	0.325419	0.0112671	28.8823	1.99195e-183	1.49574e-182
KIAA0391	3251.28	-0.411338	0.0142457	-28.8744	2.5001e-183	1.87559e-182
SHISA5	1076.88	0.846452	0.0293176	28.8718	2.69962e-183	2.02434e-182
MBOAT1	223.599	1.38256	0.0478952	28.8663	3.16642e-183	2.3733e-182
ARHGAP18	6501.38	0.734929	0.0254602	28.8659	3.2043e-183	2.40059e-182
ORAI3	350.217	1.15092	0.0398737	28.8642	3.36059e-183	2.51653e-182
TRAPPC1	832.285	0.566274	0.0196238	28.8564	4.20938e-183	3.15069e-182
TBC1D9	1129.09	-1.37229	0.0476239	-28.8152	1.38383e-182	1.0339e-181
THOC2	2348.91	-0.503295	0.0174751	-28.8008	2.09746e-182	1.56564e-181
TRIOBP	635.503	0.521599	0.0181113	28.7997	2.16423e-182	1.61475e-181
BCL2	348.361	-2.12451	0.0737801	-28.7951	2.47084e-182	1.84268e-181
EPN1	703.043	0.631021	0.0219171	28.7913	2.75595e-182	2.05436e-181
GPR180	1285.62	-0.541563	0.0188129	-28.7868	3.13459e-182	2.33555e-181
SH3GL1	641.92	0.8204	0.0284999	28.786	3.20873e-182	2.38971e-181
SARNP	876.351	-0.489966	0.0170321	-28.7672	5.52216e-182	4.11077e-181
INTS10	597.778	0.868783	0.0302051	28.7627	6.27771e-182	4.66897e-181
XLOC_002196	98.5877	-3.63891	0.126519	-28.7618	6.44166e-182	4.78874e-181
TLR2	4528.53	-1.90517	0.0662849	-28.7421	1.13783e-181	8.45097e-181
UTP18	840.578	0.437871	0.0152357	28.7398	1.21358e-181	9.00951e-181
ASB3	362.87	-0.904487	0.0314769	-28.735	1.3951e-181	1.03524e-180
LOC100506710	782.278	0.439175	0.0152871	28.7284	1.68538e-181	1.25008e-180
INO80D	1102.62	-0.566679	0.0197283	-28.7242	1.90051e-181	1.40901e-180
PRCC	599.308	-0.371412	0.012933	-28.7183	2.25572e-181	1.6716e-180
AATF	835.952	-0.370789	0.0129175	-28.7045	3.35304e-181	2.4814e-180
PDCD4	914.955	1.03909	0.0362234	28.6857	5.75714e-181	4.2567e-180
SCAP	500.436	0.762613	0.026589	28.6815	6.48366e-181	4.79171e-180
SRRT	1006.59	-0.55386	0.0193139	-28.6768	7.42786e-181	5.48704e-180
IMPA1	616.811	-0.531779	0.0185449	-28.6752	7.78378e-181	5.74738e-180
TRAF4	186.103	-1.57301	0.0548665	-28.6698	9.085e-181	6.70515e-180
ANKMY2	462.116	0.616161	0.0215052	28.6517	1.52804e-180	1.12675e-179
DNPEP	1374.14	0.3195	0.011153	28.6471	1.74253e-180	1.28433e-179
ZHX1-C8ORF76	1089.37	0.471036	0.0164515	28.6318	2.69867e-180	1.98727e-179
G0S2	253.164	-3.21126	0.112223	-28.6149	4.38886e-180	3.229e-179
LRMP	412.029	1.65531	0.0578499	28.6138	4.52255e-180	3.32587e-179
TBC1D23	1121.77	-0.458849	0.0160371	-28.6118	4.79744e-180	3.52644e-179
FFAR2	146.409	-2.00867	0.0702054	-28.6113	4.86521e-180	3.57465e-179
DNAJA1	11771.4	-0.320738	0.0112122	-28.6062	5.62289e-180	4.1295e-179
CD300E	1125.24	-3.56111	0.124492	-28.6052	5.79165e-180	4.25153e-179
LRRC4	236.078	-2.72649	0.095321	-28.6033	6.11874e-180	4.48963e-179
RASGEF1B	1840.85	-1.53809	0.0537841	-28.5975	7.21409e-180	5.29098e-179
IL18	148.888	-1.96052	0.0686001	-28.579	1.22719e-179	8.99243e-179
KCTD6	103.827	0.714288	0.0250097	28.5605	2.08319e-179	1.52581e-178
UNC45A	780.203	0.496865	0.0173982	28.5584	2.21137e-179	1.61897e-178
KLF2	37.8918	-2.6926	0.0943574	-28.5361	4.17463e-179	3.05085e-178
DDI2	1156.89	0.794545	0.0278522	28.5272	5.39331e-179	3.93796e-178
ACAP2	2409.11	0.356454	0.0125235	28.4627	3.39675e-178	2.47355e-177
BRE-AS1	26.0586	-10.3984	0.365335	-28.4626	3.40686e-178	2.4798e-177
SYNPO2	1140.3	-2.51932	0.0885174	-28.4613	3.52693e-178	2.56607e-177
MAP3K6	654.969	1.12484	0.039524	28.4597	3.69261e-178	2.68542e-177
NSUN2	1172.02	-0.427701	0.0150453	-28.4275	9.25958e-178	6.71904e-177
TMEM245	1008.4	0.616684	0.0217048	28.4123	1.42423e-177	1.03255e-176
SLC38A7	745.006	1.01388	0.035698	28.4016	1.93399e-177	1.40088e-176
TNK2	1361.27	0.557483	0.019637	28.3894	2.73288e-177	1.97781e-176
RNASE6	3629.86	1.13928	0.040141	28.3819	3.38649e-177	2.44867e-176
DCAF7	892.296	0.396842	0.0139846	28.3771	3.87468e-177	2.80043e-176
DNAJC14	800.626	-0.478072	0.0168496	-28.3729	4.36693e-177	3.15481e-176
SECISBP2L	2089.17	-0.480116	0.0169236	-28.3696	4.79273e-177	3.4609e-176
GUCY1B3	260.935	-1.68752	0.0594925	-28.3652	5.43335e-177	3.92177e-176
PRAMEF9	13.4911	-8.83317	0.31142	-28.3642	5.59898e-177	4.03955e-176
TFPI2	89.924	-3.05674	0.107792	-28.3577	6.72223e-177	4.84781e-176
PLA2G15	442.788	1.41304	0.0498384	28.3525	7.80201e-177	5.62403e-176
REEP5	5068.07	0.543106	0.019166	28.3369	1.21437e-176	8.7422e-176
SLC46A1	377.478	1.79288	0.0632825	28.3315	1.41667e-176	1.01941e-175
HBP1	3961.94	-0.733742	0.0259046	-28.3248	1.71141e-176	1.22987e-175
DAB2	2560.27	1.37991	0.0487217	28.3223	1.83418e-176	1.31752e-175
STX5	2602	-0.679715	0.0240075	-28.3126	2.41673e-176	1.73522e-175
UTP14A	303.694	-0.605003	0.0213815	-28.2956	3.91497e-176	2.80973e-175
PQLC1	1358.13	0.457266	0.0161609	28.2946	4.02599e-176	2.88814e-175
ULK1	309.709	0.783914	0.0277188	28.281	5.92524e-176	4.24875e-175
BRAT1	347.582	0.778818	0.0275415	28.2779	6.45787e-176	4.62663e-175
PHLDA2	288.028	-1.51282	0.0535232	-28.2648	9.36221e-176	6.70447e-175
MAT2B	5632.12	-0.512784	0.0181464	-28.2582	1.12913e-175	8.08238e-175
MPLKIP	261.412	-0.679659	0.0240747	-28.2313	2.41765e-175	1.72906e-174
SLC38A10	1508.31	0.462292	0.0163761	28.2298	2.52222e-175	1.80306e-174
COPS7A	709.618	0.347464	0.01231	28.2262	2.79135e-175	1.99459e-174
TERF2IP	998.398	-0.437571	0.0155025	-28.2258	2.81972e-175	2.01398e-174
SUZ12	1452.75	-0.524004	0.0185851	-28.1949	6.75748e-175	4.82232e-174
FRMD4B	863.279	1.05357	0.0373688	28.1937	6.97953e-175	4.97861e-174
TNFSF8	743.819	-2.16045	0.0766482	-28.1865	8.55568e-175	6.10025e-174
GYPC	263.744	-2.14189	0.076029	-28.172	1.28788e-174	9.17465e-174
MSL3	1411.53	0.518494	0.0184097	28.1641	1.60986e-174	1.14585e-173
PTPLAD1	587.993	0.916957	0.0325744	28.1497	2.41984e-174	1.72087e-173
IL17RC	275.62	0.717058	0.0254812	28.1406	3.12206e-174	2.21833e-173
HEATR5B	637.713	0.506639	0.0180071	28.1355	3.60791e-174	2.56132e-173
ARMCX3	862.175	-0.580937	0.020671	-28.104	8.7468e-174	6.20413e-173
HEMK1	186.029	0.737843	0.0262565	28.1013	9.43933e-174	6.69245e-173
ISOC1	419.963	-0.901056	0.0320683	-28.0981	1.03425e-173	7.32965e-173
CORO1B	1967.65	0.666321	0.0237254	28.0847	1.50765e-173	1.06708e-172
FGR	3577.71	-0.970593	0.0345644	-28.0807	1.68429e-173	1.19158e-172
HGSNAT	1906.15	0.558922	0.0199253	28.0509	3.8925e-173	2.74907e-172
ZBTB48	225.906	0.614359	0.0219056	28.0457	4.50628e-173	3.18118e-172
MAFG	1176.76	-0.668066	0.0238291	-28.0357	5.96051e-173	4.20416e-172
ARHGEF7	894.799	-0.645999	0.0230455	-28.0314	6.73065e-173	4.74329e-172
CD200	135.659	-2.18732	0.0780324	-28.0309	6.83564e-173	4.81521e-172
CD276	3991.47	-1.06773	0.0381162	-28.0125	1.14422e-172	8.05671e-172
MGEA5	2400.37	-0.573386	0.0204754	-28.0037	1.46655e-172	1.03219e-171
C7orf50	242.276	1.18045	0.0422448	27.9431	7.99165e-172	5.60784e-171
NKTR	1021.1	0.443966	0.0158943	27.9324	1.07818e-171	7.55924e-171
C9orf69	278.54	0.803508	0.0287894	27.9099	2.02536e-171	1.41818e-170
IRF2BPL	505.518	1.64079	0.0587985	27.9054	2.296e-171	1.60701e-170
GIMAP1	264.448	1.97881	0.0709288	27.8986	2.77499e-171	1.94142e-170
MICB	1318.4	-0.570469	0.020448	-27.8985	2.77844e-171	1.94301e-170
MGAT4A	5204.2	0.980897	0.035191	27.8735	5.58608e-171	3.90311e-170
SBDSP1	168.431	-0.888146	0.0318656	-27.8717	5.88504e-171	4.11025e-170
KDM2A	3951.19	-0.350864	0.0125887	-27.8714	5.92568e-171	4.13687e-170
COLGALT1	3112.43	1.00023	0.0358928	27.8671	6.69377e-171	4.67111e-170
TMEM115	485.884	0.554198	0.0198931	27.8587	8.44094e-171	5.88532e-170
BICD2	1141.34	0.590326	0.0212003	27.8452	1.23289e-170	8.58516e-170
G3BP1	4772.52	-0.58488	0.0210134	-27.8336	1.7005e-170	1.18363e-169
SUCO	878.179	-0.627585	0.0225643	-27.8132	3.0016e-170	2.08661e-169
CPPED1	1618.58	0.767492	0.0276174	27.7901	5.70628e-170	3.96345e-169
TCEAL8	415.861	0.504824	0.0181658	27.7898	5.76729e-170	4.00412e-169
PKIG	75.3185	-2.5482	0.0917333	-27.7784	7.92052e-170	5.4921e-169
CDC40	573.594	0.634306	0.022838	27.7742	8.90375e-170	6.17126e-169
PIM1	661.145	-1.62582	0.058552	-27.7671	1.08233e-169	7.49855e-169
PSMD14	889.12	-0.529898	0.0190877	-27.7612	1.27514e-169	8.83063e-169
SC5D	879.685	-0.937456	0.033795	-27.7395	2.33304e-169	1.61432e-168
CTSO	1079.37	0.620667	0.0223814	27.7314	2.92136e-169	2.01969e-168
SMAP2	4931.99	-0.431503	0.0155611	-27.7296	3.06938e-169	2.12113e-168
VPS9D1	499.429	-0.926129	0.0334174	-27.714	4.73904e-169	3.27221e-168
NUP43	561.926	0.493478	0.0178163	27.6982	7.34604e-169	5.06803e-168
XLOC_000561	14.4154	-8.90879	0.321761	-27.6876	9.84219e-169	6.7844e-168
KCNN1	118.355	-3.0603	0.110581	-27.6748	1.40408e-168	9.67048e-168
AGTPBP1	492.32	0.471443	0.0170439	27.6605	2.08674e-168	1.43662e-167
MIR548O2	5924.06	0.462314	0.0167159	27.6571	2.28981e-168	1.57576e-167
NT5C3A	9467.99	-0.630921	0.0228277	-27.6384	3.84465e-168	2.64463e-167
MB21D2	636.475	-1.2907	0.0467243	-27.6238	5.75934e-168	3.95671e-167
C1orf43	2836.37	-0.257578	0.00932718	-27.6159	7.1701e-168	4.92179e-167
CBX6	4188.02	0.589655	0.0213536	27.6138	7.60184e-168	5.21596e-167
SPPL3	559.369	0.453813	0.0164371	27.609	8.6666e-168	5.94406e-167
AMFR	1458.91	0.561561	0.0203451	27.6018	1.05757e-167	7.25037e-167
SEPHS2	1460.49	0.717825	0.02601	27.5981	1.17386e-167	8.04426e-167
RHOG	2562.04	-0.459405	0.0166498	-27.5922	1.38206e-167	9.4671e-167
RTN3	2835.5	0.466919	0.0169238	27.5895	1.48836e-167	1.01909e-166
ITFG3	865.091	0.605148	0.0219455	27.575	2.21787e-167	1.51607e-166
BC016366	296.124	-2.71913	0.0986933	-27.5513	4.2685e-167	2.91174e-166
C21orf33	645.683	0.658605	0.0239083	27.5471	4.79201e-167	3.2675e-166
SERINC3	2996.66	0.298894	0.0108583	27.5269	8.37798e-167	5.70789e-166
LIPA	367910	-0.91507	0.0332484	-27.5223	9.51101e-167	6.47713e-166
TSPAN17	566.089	0.794536	0.028896	27.4964	1.93771e-166	1.31687e-165
PCGF5	5266.33	-0.517111	0.0188117	-27.4887	2.39491e-166	1.62624e-165
DOCK2	5248.51	0.371849	0.0135372	27.4688	4.14881e-166	2.81487e-165
ARFGAP3	1148.65	-0.808439	0.0294353	-27.465	4.60442e-166	3.1227e-165
CDK6	1422.24	-1.27489	0.0464542	-27.444	8.18859e-166	5.54888e-165
FAM105A	1763.76	0.997766	0.036362	27.4398	9.20561e-166	6.23547e-165
PPP1R21	525.06	0.577907	0.0210619	27.4385	9.52766e-166	6.44828e-165
COQ2	294.691	0.68137	0.024845	27.4249	1.38594e-165	9.36063e-165
DYNC1LI2	2906.52	0.424151	0.0154667	27.4234	1.44113e-165	9.72944e-165
MKL1	2558.33	-0.991707	0.0361657	-27.4212	1.53224e-165	1.03402e-164
SAFB	1254.76	-0.432489	0.0157722	-27.4211	1.5389e-165	1.03809e-164
MORF4L1	3635.35	0.333912	0.0121778	27.4196	1.60008e-165	1.07892e-164
XLOC_008326	167.857	-2.12588	0.0775332	-27.419	1.62872e-165	1.09778e-164
KANSL1	759.914	-0.446407	0.0162816	-27.4179	1.67648e-165	1.1295e-164
MPST	176.999	0.997147	0.0363686	27.4178	1.68406e-165	1.13414e-164
MTFP1	191.903	-1.0229	0.0373138	-27.4134	1.89982e-165	1.27893e-164
AP3B1	1930.87	0.440317	0.0160712	27.3979	2.90527e-165	1.95337e-164
APBB1IP	1370.93	1.25341	0.0457879	27.3743	5.55289e-165	3.73198e-164
B3GNT2	3003.5	-0.768753	0.0281034	-27.3544	9.56622e-165	6.41872e-164
CDKN1C	201.304	2.72076	0.0994668	27.3535	9.82365e-165	6.58876e-164
CSF1R	16947.2	1.00095	0.0366023	27.3466	1.18507e-164	7.94506e-164
PPP2CA	2840.14	-0.250435	0.00916095	-27.3372	1.53376e-164	1.02786e-163
2018-09-09	3337.45	0.855003	0.0312778	27.3358	1.59487e-164	1.06837e-163
TARBP2	196.818	0.595109	0.0217719	27.3338	1.6806e-164	1.12534e-163
YPEL5	4901.38	-1.17236	0.0429009	-27.3271	2.02202e-164	1.35341e-163
FUBP1	1882.06	-0.542515	0.0198625	-27.3135	2.92986e-164	1.96025e-163
STK11IP	390.065	0.441794	0.0161751	27.3132	2.95686e-164	1.97751e-163
CD164	10551.7	0.446114	0.0163532	27.28	7.33373e-164	4.89274e-163
ELAC2	756.233	0.472772	0.0173351	27.2725	8.98406e-164	5.99132e-163
RGS1	1607.25	-2.54653	0.0934059	-27.263	1.16417e-163	7.75421e-163
UFM1	1175.17	-0.456666	0.0167548	-27.2558	1.41885e-163	9.44669e-163
FXYD2	59.3772	-2.1824	0.0800785	-27.2532	1.52147e-163	1.01258e-162
WDR70	420.869	0.420258	0.0154385	27.2214	3.62248e-163	2.40989e-162
GJB2	275.825	-2.38312	0.0876017	-27.204	5.82565e-163	3.87243e-162
CUL5	1003.07	0.42625	0.0156837	27.1779	1.1862e-162	7.87535e-162
ENKD1	41.6366	0.636619	0.0234249	27.177	1.21515e-162	8.06429e-162
PVRL2	4575.09	-0.570286	0.0210014	-27.1546	2.23252e-162	1.4804e-161
LOC285074	29.0561	-1.28938	0.0475285	-27.1287	4.52311e-162	2.99325e-161
GMFG	1037.55	0.659718	0.0243267	27.1191	5.85912e-162	3.87581e-161
B3GAT3	257.458	0.648238	0.0239155	27.1053	8.51573e-162	5.63089e-161
EXOC3L1	124.168	1.11953	0.041304	27.1046	8.70012e-162	5.7505e-161
NDRG3	461.97	0.592129	0.0218483	27.1018	9.38664e-162	6.20176e-161
PPM1F	1013.8	1.05551	0.0389759	27.081	1.64688e-161	1.08678e-160
PICALM	18891.6	-0.691709	0.025545	-27.0781	1.78382e-161	1.17668e-160
FRMD8	644.702	0.616536	0.0227714	27.075	1.93986e-161	1.27909e-160
CUEDC1	916.912	0.633309	0.0234133	27.0491	3.91077e-161	2.57658e-160
C2orf68	163.186	0.507414	0.0187651	27.0403	4.96614e-161	3.27059e-160
GGCX	288.833	0.42923	0.0158761	27.0363	5.53735e-161	3.64531e-160
SLCO5A1	241.219	-2.01608	0.0745775	-27.0334	5.99504e-161	3.94503e-160
CAB39	3351.83	0.422069	0.0156157	27.0285	6.84067e-161	4.49969e-160
POLR2A	6672.5	-0.490882	0.0181673	-27.0201	8.58753e-161	5.64196e-160
CPD	1389.96	0.449343	0.016631	27.0184	8.9737e-161	5.8933e-160
CXorf49B	8.8764	-8.3997	0.310918	-27.0158	9.63619e-161	6.32585e-160
TGOLN2	8415.18	0.425427	0.0157475	27.0155	9.71084e-161	6.3723e-160
CUL2	1059.1	0.541637	0.0200503	27.014	1.01323e-160	6.64619e-160
PHF1	300.506	-0.751729	0.0278496	-26.9924	1.81329e-160	1.18799e-159
ZFAND2B	223.217	0.536363	0.0198844	26.9741	2.97492e-160	1.94515e-159
PUM1	1871.22	-0.286084	0.0106099	-26.9639	3.92155e-160	2.56308e-159
PARP6	619.225	-0.615946	0.0228456	-26.9613	4.20337e-160	2.74618e-159
CAMK1D	1968.82	0.595655	0.0220971	26.9563	4.81389e-160	3.14254e-159
ATP6V0D1	2415.25	0.547326	0.0203047	26.9557	4.89594e-160	3.19484e-159
C11orf84	210.344	-0.832342	0.0308908	-26.9447	6.5807e-160	4.29081e-159
XPO7	1206.99	0.480822	0.0178477	26.9402	7.42472e-160	4.8392e-159
PHF19	358.565	-1.33418	0.049526	-26.939	7.68399e-160	5.0062e-159
SAT1	18074.7	-0.724153	0.0268816	-26.9386	7.76304e-160	5.05569e-159
SH2B1	329.329	0.628041	0.0233194	26.9322	9.22338e-160	6.00436e-159
CTDSPL2	1119.58	-0.397304	0.0147545	-26.9277	1.04143e-159	6.77428e-159
FBXW2	1148.64	0.439126	0.0163168	26.9125	1.57024e-159	1.021e-158
CCDC132	795.69	0.314273	0.0116848	26.896	2.44903e-159	1.59177e-158
COPS4	391.306	0.550027	0.0204507	26.8952	2.49785e-159	1.62286e-158
RCBTB1	1100.05	1.05511	0.0392354	26.8919	2.73207e-159	1.77293e-158
CARD14	476.501	1.12637	0.0419	26.8823	3.54032e-159	2.29561e-158
MED27	201.949	-0.521024	0.0193915	-26.8687	5.09898e-159	3.30496e-158
VPS36	952.097	0.386974	0.0144119	26.8509	8.22762e-159	5.32861e-158
MMD	310.102	-1.25743	0.0468364	-26.8474	9.05637e-159	5.86303e-158
NUDT16	929.654	0.787401	0.0293307	26.8456	9.48353e-159	6.13715e-158
CRAT	414.716	0.6994	0.0260553	26.8429	1.01971e-158	6.59631e-158
CEP63	387.418	0.621021	0.0231513	26.8244	1.67704e-158	1.08314e-157
SNHG5	616.533	-1.60876	0.0600098	-26.8083	2.58392e-158	1.6682e-157
ACVR2B	116.706	0.727583	0.0271406	26.8079	2.6134e-158	1.68657e-157
FZD1	691.55	-1.04211	0.0388777	-26.8049	2.83449e-158	1.82853e-157
ADH5	979.617	0.620339	0.0231463	26.8008	3.16429e-158	2.04048e-157
PARP11	885.69	0.401169	0.0149693	26.7995	3.27514e-158	2.11113e-157
SLC5A6	432.106	-0.968816	0.0361511	-26.7991	3.30998e-158	2.13275e-157
LPGAT1	1458.83	0.393981	0.0147029	26.7962	3.58038e-158	2.30426e-157
CPT1A	2425.22	0.734693	0.0274348	26.7796	5.58854e-158	3.59527e-157
BIRC3	14205.3	-2.02284	0.0755522	-26.774	6.48767e-158	4.17206e-157
MAP3K10	94.3629	-1.0564	0.0394685	-26.7657	8.1122e-158	5.21471e-157
CORO1C	8325.94	0.701046	0.0261974	26.7602	9.40067e-158	6.0406e-157
FBXO11	1789.39	-0.476474	0.017811	-26.7517	1.18089e-157	7.58509e-157
GTF2E1	777.902	0.514373	0.0192295	26.7491	1.26417e-157	8.11685e-157
ANXA5	15285.2	-0.636015	0.0237779	-26.7482	1.29715e-157	8.3253e-157
PSMD11	1067.27	-0.454808	0.017012	-26.7346	1.86442e-157	1.19568e-156
ALAS1	2752.68	-0.888598	0.033238	-26.7344	1.8755e-157	1.20231e-156
NOC3L	524.616	-0.617761	0.0231286	-26.7099	3.61211e-157	2.31198e-156
EDEM1	9967.65	-0.988855	0.0370366	-26.6994	4.78281e-157	3.0601e-156
RHEB	1865.72	-0.475855	0.0178326	-26.6846	7.10166e-157	4.54019e-156
KIAA0232	873.958	0.493472	0.0185058	26.6658	1.17297e-156	7.49313e-156
MIR548N	1893.8	0.355642	0.0133373	26.6653	1.18808e-156	7.58669e-156
PHF2	877.51	0.300402	0.0112665	26.6634	1.25016e-156	7.97999e-156
ENSA	1762.02	-0.417298	0.0156594	-26.6485	1.86501e-156	1.19001e-155
TFEB	195.487	0.845848	0.0318022	26.5971	7.32556e-156	4.66333e-155
TNFRSF4	399.404	-3.52249	0.13245	-26.5948	7.79952e-156	4.96311e-155
FAM91A1	3365.19	0.528968	0.0198908	26.5936	8.05938e-156	5.12648e-155
RFTN1	3341.86	-0.977365	0.0367577	-26.5894	9.0125e-156	5.72386e-155
MRPS18B	455.553	0.572568	0.021546	26.5742	1.34928e-155	8.56597e-155
LRCH4	1593.62	-0.574411	0.0216209	-26.5674	1.61813e-155	1.02648e-154
ZFAND2A	142.373	-1.01632	0.0382694	-26.5571	2.12695e-155	1.3477e-154
PCMTD2	278.779	0.893963	0.0336727	26.5486	2.66566e-155	1.68773e-154
ANAPC4	399.815	0.407701	0.0153632	26.5375	3.57993e-155	2.26572e-154
HSP90AB1	14862.9	-0.539061	0.0203195	-26.5292	4.46012e-155	2.8217e-154
FN3KRP	384.602	0.678736	0.0256016	26.5114	7.15432e-155	4.51922e-154
NDUFS2	1234.18	0.45077	0.0170069	26.5051	8.46353e-155	5.34415e-154
FMNL2	3116.59	-0.961234	0.0362845	-26.4916	1.21262e-154	7.65396e-154
AP1B1	7064.3	0.665855	0.0251415	26.4843	1.46931e-154	9.27056e-154
EIF2B4	361.395	0.401898	0.0151766	26.4814	1.58941e-154	1.00245e-153
NUP54	496.625	-0.414943	0.01567	-26.4801	1.64342e-154	1.03611e-153
SHC4	1942.64	0.432986	0.0163543	26.4753	1.86382e-154	1.17461e-153
NAGA	5764.99	0.582764	0.0220135	26.473	1.98575e-154	1.25098e-153
RPL22L1	245.896	-0.875351	0.0330884	-26.4549	3.20386e-154	2.01759e-153
XRN1	8785.8	-0.40761	0.0154142	-26.4439	4.29298e-154	2.70137e-153
ARHGEF18	831.954	0.523244	0.0197936	26.4349	5.43617e-154	3.41809e-153
TLE1	274.314	-1.58433	0.0599407	-26.4316	5.93318e-154	3.72917e-153
CUL4B	1513.2	0.389336	0.0147375	26.418	8.50679e-154	5.34266e-153
DHX8	1342.47	0.260313	0.00985504	26.4142	9.40496e-154	5.90448e-153
UBE2E3	472.874	0.474	0.0179524	26.4032	1.26066e-153	7.90841e-153
SKI	830.521	0.767261	0.0290661	26.3971	1.47869e-153	9.26909e-153
FLJ16341	9.65528	-2.09053	0.0792102	-26.3922	1.68208e-153	1.054e-152
OCRL	454.141	0.396711	0.0150328	26.3897	1.79835e-153	1.12642e-152
HEBP1	1233.19	0.935278	0.0354531	26.3807	2.28243e-153	1.42909e-152
SPIN1	736.118	0.719089	0.0272645	26.3745	2.68663e-153	1.68024e-152
DCUN1D1	1479.76	-0.37026	0.0140452	-26.362	3.73602e-153	2.33566e-152
IPO7	2758.58	-0.436752	0.0165742	-26.3513	4.95415e-153	3.09601e-152
EXOSC9	1370.51	-1.01034	0.0383481	-26.3465	5.62505e-153	3.5126e-152
XLOC_000182	230.509	-1.20526	0.0457482	-26.3454	5.7925e-153	3.61441e-152
HERC3	1292.87	0.501556	0.0190378	26.3452	5.82137e-153	3.63105e-152
KIAA0430	1393.12	0.425213	0.0161466	26.3345	7.7185e-153	4.81071e-152
TRERF1	465.918	1.45006	0.0550668	26.3327	8.09584e-153	5.04398e-152
DOK2	1520.9	1.12908	0.0428968	26.3208	1.10921e-152	6.90815e-152
BET1L	741.77	0.461977	0.017562	26.3055	1.66065e-152	1.03385e-151
TUBB3	411.958	-1.35612	0.0515609	-26.3013	1.851e-152	1.15192e-151
RBL2	1327.52	0.547734	0.0208395	26.2834	2.96693e-152	1.84569e-151
NCF4	1082.45	0.951483	0.0362021	26.2825	3.03819e-152	1.8893e-151
SLMO2	861.855	-0.481391	0.0183227	-26.2729	3.91489e-152	2.43356e-151
PTK2B	3707.7	-1.08162	0.041169	-26.2726	3.94856e-152	2.45355e-151
XLOC_008620	588.318	2.1134	0.0804618	26.2659	4.71125e-152	2.92526e-151
SERINC5	1291.26	-1.13467	0.0432121	-26.2582	5.76558e-152	3.57855e-151
SDE2	532.135	-0.427872	0.016301	-26.2482	7.4846e-152	4.64374e-151
LDB1	848.564	0.826164	0.0314798	26.2443	8.31366e-152	5.15617e-151
SERTAD2	702.935	-0.74143	0.0282565	-26.2393	9.47217e-152	5.87024e-151
DAP3	1042.19	-0.331016	0.0126175	-26.2347	1.06797e-151	6.61606e-151
PYCARD	606.532	0.991276	0.037799	26.2249	1.38126e-151	8.54722e-151
PSENEN	589.842	0.36857	0.0140579	26.218	1.65767e-151	1.02499e-150
JAKMIP2	190.817	-2.45389	0.0936184	-26.2116	1.95828e-151	1.2095e-150
ZWILCH	451.94	-0.942263	0.0359541	-26.2074	2.18859e-151	1.35073e-150
XLOC_006531	24.0515	-6.93269	0.264603	-26.2003	2.63526e-151	1.62457e-150
EIF4E2	1713.01	0.325283	0.0124225	26.1849	3.94562e-151	2.42963e-150
WDR82	2621.07	0.32263	0.012339	26.1472	1.06146e-150	6.52885e-150
BID	1437.05	-0.871165	0.0333521	-26.1202	2.14763e-150	1.31998e-149
APOL2	3786.91	-0.517729	0.0198224	-26.1184	2.25639e-150	1.38631e-149
SEC11A	1439.88	0.323825	0.0124058	26.1028	3.38842e-150	2.07948e-149
PRPF40A	2469.64	-0.226568	0.00868229	-26.0954	4.11357e-150	2.52357e-149
BRD8	568.451	0.858423	0.0328961	26.095	4.15577e-150	2.5485e-149
AMD1	4172.19	-0.718304	0.0275418	-26.0805	6.07309e-150	3.7215e-149
TNFSF13B	10223.5	-0.624866	0.0239658	-26.0732	7.34486e-150	4.49914e-149
FBXL3	1406.16	-0.390428	0.0149775	-26.0676	8.49114e-150	5.19936e-149
KDM1B	2013.01	0.51677	0.019831	26.0586	1.07358e-149	6.56893e-149
MDFIC	1191.57	0.507166	0.0194654	26.0547	1.18968e-149	7.27656e-149
GIMAP6	980.949	2.00414	0.0769958	26.0292	2.31392e-149	1.41371e-148
INTS4	464.799	0.666006	0.0255901	26.0259	2.52148e-149	1.53994e-148
TFB1M	124.556	0.798417	0.0306867	26.0183	3.07386e-149	1.8759e-148
TFG	2107.1	-0.358436	0.0137906	-25.9913	6.21857e-149	3.7894e-148
MAST3	190.913	0.93922	0.0361383	25.9896	6.49629e-149	3.95716e-148
PPID	832.615	-0.415977	0.0160167	-25.9715	1.03989e-148	6.32971e-148
B2M	122807	-0.411626	0.0158501	-25.97	1.08171e-148	6.58181e-148
HES6	79.9077	-1.33088	0.0513337	-25.9261	3.38459e-148	2.05787e-147
USF1	1361.03	0.407228	0.0157074	25.9259	3.39637e-148	2.06427e-147
TMEM179B	531.949	0.411652	0.0158904	25.9058	5.73232e-148	3.48015e-147
CHD4	3324.07	-0.429653	0.0165879	-25.9016	6.38719e-148	3.87486e-147
KIAA0141	584.023	0.557047	0.0215296	25.8736	1.32113e-147	8.00588e-147
GANAB	4939.92	0.435643	0.0168436	25.864	1.69179e-147	1.02482e-146
C16orf70	663.253	0.545717	0.0211002	25.8632	1.7295e-147	1.04728e-146
ZBTB7B	1065.69	0.671537	0.025979	25.8492	2.48592e-147	1.50422e-146
SMC6	561.545	0.667981	0.0258432	25.8475	2.59848e-147	1.57174e-146
MRPL14	363.732	-0.562057	0.0217468	-25.8455	2.73409e-147	1.65316e-146
ACTR3	14437.3	-0.434206	0.0168092	-25.8315	3.9286e-147	2.37279e-146
CNPY3	794.673	0.781071	0.0302399	25.8291	4.1754e-147	2.52093e-146
ATP13A3	5093.91	-0.974163	0.0377223	-25.8246	4.69494e-147	2.83356e-146
RASGRP4	294.33	1.26258	0.0488983	25.8204	5.2294e-147	3.1538e-146
ADNP	1228.01	-0.421687	0.0163338	-25.8168	5.74248e-147	3.46196e-146
RASSF3	1926.49	0.396774	0.0153697	25.8154	5.95845e-147	3.59084e-146
PML	5652.82	-0.424853	0.0164604	-25.8105	6.75568e-147	4.0698e-146
TECR	604.591	0.699132	0.0270914	25.8064	7.50802e-147	4.52136e-146
IRF5	3633.98	0.581186	0.022522	25.8053	7.74178e-147	4.65871e-146
ESRRA	219.769	0.659431	0.0255625	25.7968	9.62217e-147	5.78601e-146
INTS12	457.245	-0.403351	0.0156371	-25.7945	1.0228e-146	6.14579e-146
COPG1	2748.52	-0.252609	0.00979657	-25.7855	1.28956e-146	7.74018e-146
JKAMP	1502.28	0.532518	0.0206579	25.7779	1.56815e-146	9.40543e-146
FRMD3	1136.78	-1.22253	0.0474309	-25.775	1.69197e-146	1.01444e-145
LENG8	1392.77	0.743187	0.0288388	25.7704	1.90484e-146	1.14165e-145
RAB32	972.541	0.80467	0.0312247	25.7703	1.90868e-146	1.14353e-145
FTSJD2	3390.22	0.336523	0.013061	25.7655	2.15937e-146	1.29326e-145
TTC9	235.491	1.6093	0.0624699	25.7612	2.41399e-146	1.44416e-145
MED8	502.891	0.311323	0.0120964	25.7369	4.5198e-146	2.69904e-145
FRG2B	13.701	-3.65644	0.142124	-25.7271	5.82327e-146	3.47362e-145
IRF7	4222.55	-0.718536	0.0279401	-25.717	7.5425e-146	4.49588e-145
ATP8B4	1179.81	1.08365	0.0421636	25.7011	1.13767e-145	6.77395e-145
MRPL16	463.354	0.5507	0.0214411	25.6844	1.74761e-145	1.03981e-144
SMIM4	71.3246	0.877735	0.0341789	25.6806	1.92447e-145	1.14463e-144
MAPKAP1	1089.16	0.552595	0.021524	25.6734	2.3188e-145	1.37866e-144
ZMYM6	696.724	0.637632	0.0248525	25.6567	3.55974e-145	2.11494e-144
ALDH3B1	522.443	0.809832	0.0315649	25.6561	3.61453e-145	2.14671e-144
CCSAP	1277.72	0.732883	0.0285721	25.6503	4.1997e-145	2.49245e-144
WDTC1	734.863	0.67478	0.0263324	25.6255	7.93536e-145	4.70269e-144
VAMP3	2790.13	0.387602	0.0151377	25.605	1.34283e-144	7.94929e-144
GP1BA	754.098	-3.27827	0.128045	-25.6026	1.4288e-144	8.45522e-144
LAMTOR1	1291.87	0.492275	0.0192434	25.5816	2.44654e-144	1.44622e-143
TNFRSF12A	43.8125	-1.70811	0.0667752	-25.58	2.54782e-144	1.50554e-143
TWSG1	1848.72	-0.932119	0.0364549	-25.5691	3.36873e-144	1.98992e-143
XLOC_003003	199.832	1.77704	0.0695102	25.5651	3.72698e-144	2.20075e-143
LOC155060	176.542	0.564397	0.0220778	25.564	3.83235e-144	2.26215e-143
ZNF91	48.6637	-0.847051	0.0331412	-25.5588	4.38149e-144	2.58536e-143
RNASE4	258.464	1.45163	0.0568014	25.5563	4.67234e-144	2.75599e-143
DUSP23	140.377	0.882513	0.0345409	25.5498	5.52212e-144	3.25607e-143
MBP	2120.06	0.746802	0.0292363	25.5437	6.45575e-144	3.8052e-143
PINK1	298.532	0.841612	0.0329561	25.5373	7.5911e-144	4.4728e-143
HINT3	1258.39	-0.535715	0.0209796	-25.535	8.06205e-144	4.74518e-143
YWHAQ	4005.97	-0.378815	0.0148368	-25.5322	8.66419e-144	5.09775e-143
CCDC107	175.733	0.631946	0.0247717	25.5108	1.49649e-143	8.79226e-143
VPS25	515.055	0.400579	0.0157056	25.5055	1.71229e-143	1.00565e-142
RGS12	184.056	0.883308	0.034649	25.493	2.35536e-143	1.38136e-142
DENND2C	324.395	-0.42307	0.0166057	-25.4774	3.51259e-143	2.05931e-142
NDST1	979.155	0.866824	0.0340389	25.4657	4.73492e-143	2.77394e-142
CASS4	1758.27	-1.79573	0.0705221	-25.4634	5.01229e-143	2.93526e-142
RPL12	6062.95	-0.443514	0.0174301	-25.4453	7.95673e-143	4.65311e-142
SLC25A19	478.448	0.738253	0.0290409	25.4211	1.47262e-142	8.59964e-142
PPP2R5D	505.793	0.592814	0.0233276	25.4126	1.82915e-142	1.0674e-141
ACSL4	5573.52	-0.543947	0.0214055	-25.4116	1.87635e-142	1.09456e-141
CTBP1	993.569	0.586367	0.0230779	25.4082	2.04569e-142	1.19292e-141
SNRNP200	4895.28	0.555425	0.0218614	25.4066	2.12984e-142	1.24155e-141
FUBP3	684.811	0.307722	0.0121141	25.402	2.39783e-142	1.39677e-141
TRIP10	663.774	-1.3338	0.0525082	-25.4018	2.40926e-142	1.40294e-141
KLHL22	229.508	0.757492	0.0298524	25.3746	4.80979e-142	2.79483e-141
CARS2	317.67	0.692951	0.0273194	25.3648	6.164e-142	3.57918e-141
PDE6D	289.213	0.412083	0.0162473	25.3632	6.42446e-142	3.7291e-141
TRABD	716.687	0.788305	0.0311005	25.347	9.68577e-142	5.61617e-141
STAU2	398.48	0.577773	0.0227974	25.3438	1.05162e-141	6.09551e-141
STAB1	9683.29	1.56108	0.0616069	25.3394	1.17752e-141	6.82285e-141
DYNC1H1	13612	0.409249	0.0161512	25.3386	1.20046e-141	6.95335e-141
POLR2E	1516.8	0.341119	0.0134722	25.3202	1.91345e-141	1.10714e-140
AIFM1	1163.45	0.758098	0.0299422	25.3187	1.98786e-141	1.14979e-140
POLR2H	328.397	-0.507412	0.0200425	-25.3169	2.08341e-141	1.20463e-140
HMHA1	2127.64	0.758299	0.0299805	25.2931	3.80694e-141	2.19885e-140
YDJC	131.666	-0.851636	0.0336742	-25.2905	4.06612e-141	2.34772e-140
MATR3	4508.37	-0.318892	0.0126142	-25.2805	5.23846e-141	3.02249e-140
CD86	8643.01	-0.806449	0.0319177	-25.2665	7.45278e-141	4.29708e-140
HMGN4	1286.67	0.551061	0.0218108	25.2655	7.65417e-141	4.41164e-140
DTX3L	11631.9	-0.400685	0.0158609	-25.2624	8.28126e-141	4.7714e-140
ADRBK1	2204.91	0.74812	0.0296196	25.2576	9.3476e-141	5.3839e-140
KLF16	275.276	0.764387	0.0302672	25.2546	1.00838e-140	5.80588e-140
ST6GAL1	3057.49	1.24709	0.049397	25.2462	1.24679e-140	7.17355e-140
FAM219B	395.868	0.535352	0.0212054	25.2461	1.25106e-140	7.19559e-140
ARHGDIB	8603.2	0.666611	0.0264061	25.2446	1.29879e-140	7.4675e-140
SLAMF1	1665.46	-1.57058	0.0622225	-25.2413	1.4103e-140	8.10579e-140
CHST12	593.167	0.702822	0.0278464	25.2392	1.48859e-140	8.55272e-140
C1orf216	450.738	0.543135	0.0215228	25.2353	1.64219e-140	9.43196e-140
ANKRD13D	393.621	0.568523	0.0225332	25.2304	1.85762e-140	1.06656e-139
C17orf62	2968.73	0.439961	0.0174474	25.2164	2.64909e-140	1.52044e-139
TUBGCP2	1035.09	0.480094	0.0190449	25.2086	3.22697e-140	1.85082e-139
HSPBAP1	220.041	0.785626	0.0311714	25.2034	3.67593e-140	2.10685e-139
GCOM1	785.303	-0.379769	0.0150727	-25.1958	4.44851e-140	2.54787e-139
GFM1	831.286	0.512367	0.0203517	25.1756	7.40418e-140	4.23775e-139
ILKAP	253.168	-0.482256	0.0191558	-25.1754	7.44653e-140	4.26051e-139
C12orf76	155.898	0.94358	0.0374884	25.1699	8.56022e-140	4.89599e-139
SNAPIN	490.169	0.37925	0.0150754	25.1568	1.1912e-139	6.81063e-139
BC067244	293.751	-0.863752	0.0343417	-25.1517	1.35385e-139	7.73521e-139
ID3	967.107	1.71861	0.0683487	25.1447	1.6131e-139	9.21322e-139
NCOA5	877.879	0.407401	0.0162044	25.1415	1.75181e-139	1.0002e-138
STX2	405.408	0.810233	0.0322409	25.1306	2.30334e-139	1.31418e-138
EMC10	1473.69	0.407985	0.0162349	25.1302	2.32822e-139	1.32791e-138
SLC3A2	5696.82	-0.719438	0.0286291	-25.1296	2.36328e-139	1.34744e-138
DDX27	1338.21	-0.381922	0.0151994	-25.1274	2.49373e-139	1.42132e-138
DSC2	366.543	1.15951	0.0461463	25.1268	2.53562e-139	1.44469e-138
CHD6	1292.84	-0.687309	0.0273582	-25.1226	2.82049e-139	1.60644e-138
POLR2L	396.622	0.576951	0.022972	25.1154	3.37998e-139	1.92377e-138
BNIP2	2445.67	0.292601	0.0116532	25.109	3.96276e-139	2.2539e-138
ITLN1	4.36281	-3.69139	0.14708	-25.0977	5.26281e-139	2.99126e-138
RMI2	871.807	0.69321	0.0276258	25.0929	5.95047e-139	3.38094e-138
THG1L	141.463	-0.481072	0.0191797	-25.0824	7.74429e-139	4.39863e-138
ASPSCR1	171.926	0.539128	0.0214947	25.0819	7.84349e-139	4.45343e-138
RASSF1	419.633	0.528445	0.0210705	25.0799	8.24099e-139	4.6775e-138
CNTLN	832.361	-0.659831	0.0263288	-25.0611	1.31991e-138	7.48133e-138
ACSL1	5042.81	-0.940814	0.0375498	-25.0551	1.53462e-138	8.69531e-138
PATL2	192.459	-0.894206	0.0356977	-25.0494	1.77161e-138	1.00347e-137
GOPC	1353.06	-0.521167	0.020816	-25.0369	2.42788e-138	1.37471e-137
SRSF6	1331.53	-0.638791	0.0255149	-25.036	2.47904e-138	1.40319e-137
ACADS	276.361	0.671169	0.0268297	25.0159	4.10341e-138	2.32182e-137
AP5Z1	1053.76	-0.51937	0.0207685	-25.0076	5.05303e-138	2.85717e-137
OLFML3	362.374	1.39581	0.055817	25.0069	5.14896e-138	2.9104e-137
HIF1AN	993.904	0.328892	0.0131568	24.9978	6.45583e-138	3.64533e-137
AGO1	493.467	0.493267	0.0197341	24.9956	6.81826e-138	3.84865e-137
RBMX	1937.84	-0.59453	0.0237904	-24.9904	7.77927e-138	4.3896e-137
TBC1D10A	317.129	-0.66381	0.0265727	-24.9809	9.8565e-138	5.55789e-137
GREM1	85.2416	-3.26856	0.130867	-24.9763	1.1069e-137	6.23945e-137
NIPA1	764.337	-0.652168	0.0261137	-24.9742	1.16589e-137	6.56969e-137
ARL6IP1	4369.99	-0.351951	0.0140934	-24.9728	1.20688e-137	6.79832e-137
TMEM175	411.71	0.493795	0.0197792	24.9653	1.45526e-137	8.19467e-137
XLOC_005595	75.4834	-2.14818	0.0860781	-24.9561	1.83152e-137	1.03098e-136
DLAT	1057.02	-0.590654	0.0236761	-24.9472	2.28784e-137	1.28741e-136
RNH1	5965.73	0.536849	0.0215209	24.9455	2.39129e-137	1.34516e-136
RYK	491.71	0.773605	0.0310246	24.9352	3.08982e-137	1.7375e-136
SKIV2L2	1010.63	0.546987	0.0219373	24.9341	3.17529e-137	1.78496e-136
MGAT4B	1096.64	0.505909	0.020297	24.9253	3.95777e-137	2.22406e-136
ZDHHC12	511.596	0.65438	0.0262651	24.9145	5.18344e-137	2.91082e-136
TCEB1	712.29	-0.422908	0.0169768	-24.9109	5.66641e-137	3.18095e-136
CAPN1	2732.83	0.354261	0.0142301	24.8951	8.41228e-137	4.71917e-136
TPI1	6095.69	-0.441026	0.0177186	-24.8905	9.41966e-137	5.28068e-136
ZMYND11	665.327	0.50548	0.0203101	24.8881	9.99901e-137	5.60355e-136
DAG1	679.35	0.700304	0.0281419	24.8847	1.08988e-136	6.1057e-136
NEMF	2028.45	-0.37215	0.0149571	-24.8811	1.19187e-136	6.67252e-136
CUTA	620.506	0.430973	0.0173282	24.8712	1.52434e-136	8.53088e-136
DDB2	956.333	0.6503	0.0261522	24.866	1.73498e-136	9.70312e-136
CNOT3	458.928	-0.377988	0.0152012	-24.8657	1.74899e-136	9.77814e-136
ARAP1	3605.9	0.500126	0.0201162	24.8619	1.92431e-136	1.07509e-135
RAB43	312.89	1.64131	0.066042	24.8525	2.4282e-136	1.35569e-135
[truncated: 6,195 more rows]
