# Supplementary material for: Genetic analysis of isoform usage in the human anti-viral response reveals influenza-specific regulation of ERAP2 transcripts under balancing selection
Source: Genome Res. 2018 Dec;28(12):1812–25. doi: 10.1101/gr.240390.118 (PMC6280757; doi:10.1101/gr.240390.118)
Supplement: Supplemental Material [file supp_gr.240390.118_SupplementalTable5.xlsx]

## Sheet: Cluster I - Flu Down
GO Term	Description	P-value	FDR q-value	Enrichment	N	B	n	b	Genes
GO:0016616	oxidoreductase activity, acting on the CH-OH group of donors, NAD or NADP as acceptor	1.12e-05	0.0247	2.22	2307	21	890	18	[AKR1C3 - aldo-keto reductase family 1, member c3, ME3 - malic enzyme 3, nadp(+)-dependent, mitochondrial, DHRS4 - dehydrogenase/reductase (sdr family) member 4, HSD3B7 - hydroxy-delta-5-steroid dehydrogenase, 3 beta- and steroid delta-isomerase 7, PTGR1 - prostaglandin reductase 1, AKR1A1 - aldo-keto reductase family 1, member a1 (aldehyde reductase), CBR4 - carbonyl reductase 4, ABCC4 - atp-bin…
GO:0016614	oxidoreductase activity, acting on CH-OH group of donors	3.95e-05	0.0434	2.12	2307	22	890	18	[AKR1C3 - aldo-keto reductase family 1, member c3, ME3 - malic enzyme 3, nadp(+)-dependent, mitochondrial, DHRS4 - dehydrogenase/reductase (sdr family) member 4, HSD3B7 - hydroxy-delta-5-steroid dehydrogenase, 3 beta- and steroid delta-isomerase 7, PTGR1 - prostaglandin reductase 1, AKR1A1 - aldo-keto reductase family 1, member a1 (aldehyde reductase), CBR4 - carbonyl reductase 4, ABCC4 - atp-bin…

## Sheet: Cluster II - Flu and IFN Up
GO Term	Description	P-value	FDR q-value	Enrichment	N	B	n	b	Genes
GO:0002376	immune system process	7.1e-10	6.41e-06	1.56	2307	373	514	130	[MICB - mhc class i polypeptide-related sequence b, ERAP1 - endoplasmic reticulum aminopeptidase 1, DHX58 - dexh (asp-glu-x-his) box polypeptide 58, EXOSC9 - exosome component 9, APOBEC3B - apolipoprotein b mrna editing enzyme, catalytic polypeptide-like 3b, IL15 - interleukin 15, TSPAN14 - tetraspanin 14, HVCN1 - hydrogen voltage-gated channel 1, DDX60 - dead (asp-glu-ala-asp) box polypeptide 60…
GO:0051607	defense response to virus	2.12e-09	9.56e-06	2.64	2307	56	514	33	[IFIT2 - interferon-induced protein with tetratricopeptide repeats 2, IFIT1 - interferon-induced protein with tetratricopeptide repeats 1, DHX58 - dexh (asp-glu-x-his) box polypeptide 58, IFIT3 - interferon-induced protein with tetratricopeptide repeats 3, APOBEC3B - apolipoprotein b mrna editing enzyme, catalytic polypeptide-like 3b, OASL - 2'-5'-oligoadenylate synthetase-like, CD207 - cd207 mol…
GO:0006955	immune response	1.31e-07	0.000394	1.73	2307	184	514	71	[MICB - mhc class i polypeptide-related sequence b, ERAP1 - endoplasmic reticulum aminopeptidase 1, EXOSC9 - exosome component 9, DHX58 - dexh (asp-glu-x-his) box polypeptide 58, IL15 - interleukin 15, APOBEC3B - apolipoprotein b mrna editing enzyme, catalytic polypeptide-like 3b, DDX60 - dead (asp-glu-ala-asp) box polypeptide 60, NLRC5 - nlr family, card domain containing 5, PAX5 - paired box 5,…
GO:0098542	defense response to other organism	1.53e-07	0.000346	2.12	2307	87	514	41	[IFIT2 - interferon-induced protein with tetratricopeptide repeats 2, IFIT1 - interferon-induced protein with tetratricopeptide repeats 1, DHX58 - dexh (asp-glu-x-his) box polypeptide 58, IFIT3 - interferon-induced protein with tetratricopeptide repeats 3, APOBEC3B - apolipoprotein b mrna editing enzyme, catalytic polypeptide-like 3b, OASL - 2'-5'-oligoadenylate synthetase-like, CD207 - cd207 mol…
GO:0006952	defense response	2.81e-07	0.000508	1.66	2307	208	514	77	[MICB - mhc class i polypeptide-related sequence b, IFIT2 - interferon-induced protein with tetratricopeptide repeats 2, IFIT1 - interferon-induced protein with tetratricopeptide repeats 1, IFIT3 - interferon-induced protein with tetratricopeptide repeats 3, DHX58 - dexh (asp-glu-x-his) box polypeptide 58, APOBEC3B - apolipoprotein b mrna editing enzyme, catalytic polypeptide-like 3b, IL15 - inte…
GO:0009615	response to virus	7.81e-07	0.00118	2.15	2307	73	514	35	[IFIT2 - interferon-induced protein with tetratricopeptide repeats 2, IFIT1 - interferon-induced protein with tetratricopeptide repeats 1, IFIT3 - interferon-induced protein with tetratricopeptide repeats 3, DHX58 - dexh (asp-glu-x-his) box polypeptide 58, APOBEC3B - apolipoprotein b mrna editing enzyme, catalytic polypeptide-like 3b, OASL - 2'-5'-oligoadenylate synthetase-like, CD207 - cd207 mol…
GO:0060337	type I interferon signaling pathway	9.7e-07	0.00125	2.81	2307	32	514	20	[IFIT2 - interferon-induced protein with tetratricopeptide repeats 2, HLA-C - major histocompatibility complex, class i, c, IFIT1 - interferon-induced protein with tetratricopeptide repeats 1, IFIT3 - interferon-induced protein with tetratricopeptide repeats 3, HLA-G - major histocompatibility complex, class i, g, OASL - 2'-5'-oligoadenylate synthetase-like, IFI27 - interferon, alpha-inducible pr…
GO:0051707	response to other organism	1.36e-06	0.00153	1.88	2307	112	514	47	[IFIT2 - interferon-induced protein with tetratricopeptide repeats 2, IFIT1 - interferon-induced protein with tetratricopeptide repeats 1, ERAP1 - endoplasmic reticulum aminopeptidase 1, IFIT3 - interferon-induced protein with tetratricopeptide repeats 3, DHX58 - dexh (asp-glu-x-his) box polypeptide 58, APOBEC3B - apolipoprotein b mrna editing enzyme, catalytic polypeptide-like 3b, CD207 - cd207 …
GO:0060333	interferon-gamma-mediated signaling pathway	1.52e-06	0.00152	3.12	2307	23	514	16	[HLA-C - major histocompatibility complex, class i, c, HLA-G - major histocompatibility complex, class i, g, OASL - 2'-5'-oligoadenylate synthetase-like, STAT1 - signal transducer and activator of transcription 1, 91kda, GBP2 - guanylate binding protein 2, interferon-inducible, TRIM38 - tripartite motif containing 38, IRF2 - interferon regulatory factor 2, TRIM26 - tripartite motif containing 26,…
GO:0002252	immune effector process	1.64e-06	0.00148	1.71	2307	163	514	62	[MICB - mhc class i polypeptide-related sequence b, TMEM30A - transmembrane protein 30a, TMEM63A - transmembrane protein 63a, IFIT2 - interferon-induced protein with tetratricopeptide repeats 2, IFIT1 - interferon-induced protein with tetratricopeptide repeats 1, DHX58 - dexh (asp-glu-x-his) box polypeptide 58, IFIT3 - interferon-induced protein with tetratricopeptide repeats 3, APOBEC3B - apolip…
GO:0045087	innate immune response	5.39e-06	0.00443	1.9	2307	97	514	41	[MICB - mhc class i polypeptide-related sequence b, MCOLN2 - mucolipin 2, DHX58 - dexh (asp-glu-x-his) box polypeptide 58, APOBEC3B - apolipoprotein b mrna editing enzyme, catalytic polypeptide-like 3b, DDX60 - dead (asp-glu-ala-asp) box polypeptide 60, NLRC5 - nlr family, card domain containing 5, CLEC7A - c-type lectin domain family 7, member a, SIGLEC14 - sialic acid binding ig-like lectin 14,…
GO:0043207	response to external biotic stimulus	1.51e-05	0.0113	1.63	2307	162	514	59	[IFIT2 - interferon-induced protein with tetratricopeptide repeats 2, ERAP1 - endoplasmic reticulum aminopeptidase 1, IFIT1 - interferon-induced protein with tetratricopeptide repeats 1, DHX58 - dexh (asp-glu-x-his) box polypeptide 58, IFIT3 - interferon-induced protein with tetratricopeptide repeats 3, APOBEC3B - apolipoprotein b mrna editing enzyme, catalytic polypeptide-like 3b, OASL - 2'-5'-o…
GO:0051704	multi-organism process	2.12e-05	0.0147	1.51	2307	229	514	77	[MICB - mhc class i polypeptide-related sequence b, IFIT2 - interferon-induced protein with tetratricopeptide repeats 2, IFIT1 - interferon-induced protein with tetratricopeptide repeats 1, ERAP1 - endoplasmic reticulum aminopeptidase 1, IFIT3 - interferon-induced protein with tetratricopeptide repeats 3, DHX58 - dexh (asp-glu-x-his) box polypeptide 58, ABI1 - abl-interactor 1, APOBEC3B - apolipo…
GO:0009607	response to biotic stimulus	2.33e-05	0.015	1.61	2307	164	514	59	[IFIT2 - interferon-induced protein with tetratricopeptide repeats 2, ERAP1 - endoplasmic reticulum aminopeptidase 1, IFIT1 - interferon-induced protein with tetratricopeptide repeats 1, DHX58 - dexh (asp-glu-x-his) box polypeptide 58, IFIT3 - interferon-induced protein with tetratricopeptide repeats 3, APOBEC3B - apolipoprotein b mrna editing enzyme, catalytic polypeptide-like 3b, OASL - 2'-5'-o…
GO:0019221	cytokine-mediated signaling pathway	4.26e-05	0.0256	1.66	2307	135	514	50	[IFIT2 - interferon-induced protein with tetratricopeptide repeats 2, IFIT1 - interferon-induced protein with tetratricopeptide repeats 1, IFIT3 - interferon-induced protein with tetratricopeptide repeats 3, IL15 - interleukin 15, HLA-G - major histocompatibility complex, class i, g, IFI27 - interferon, alpha-inducible protein 27, OASL - 2'-5'-oligoadenylate synthetase-like, IL15RA - interleukin …
GO:0002684	positive regulation of immune system process	5.19e-05	0.0293	1.54	2307	186	514	64	[MICB - mhc class i polypeptide-related sequence b, DHX58 - dexh (asp-glu-x-his) box polypeptide 58, IL15 - interleukin 15, ABI1 - abl-interactor 1, HLA-G - major histocompatibility complex, class i, g, DDX60 - dead (asp-glu-ala-asp) box polypeptide 60, NLRC5 - nlr family, card domain containing 5, CXCL12 - chemokine (c-x-c motif) ligand 12, RBCK1 - ranbp-type and c3hc4-type zinc finger containin…
GO:0050776	regulation of immune response	8.93e-05	0.0474	1.5	2307	200	514	67	[MICB - mhc class i polypeptide-related sequence b, ERAP1 - endoplasmic reticulum aminopeptidase 1, DHX58 - dexh (asp-glu-x-his) box polypeptide 58, ABI1 - abl-interactor 1, IL15 - interleukin 15, HLA-G - major histocompatibility complex, class i, g, USP18 - ubiquitin specific peptidase 18, XIAP - x-linked inhibitor of apoptosis, NLRC5 - nlr family, card domain containing 5, DDX60 - dead (asp-glu…

## Sheet: Cluster III - Flu Up
GO Term	Description	P-value	FDR q-value	Enrichment	N	B	n	b	Genes
GO:0010468	regulation of gene expression	2.9e-06	0.00623	1.24	4045	1234	709	268	[CCNK - cyclin k, CREB5 - camp responsive element binding protein 5, TOB1 - transducer of erbb2, 1, PCGF5 - polycomb group ring finger 5, WTAP - wilms tumor 1 associated protein, CASZ1 - castor zinc finger 1, RBM39 - rna binding motif protein 39, TAF1D - tata box binding protein (tbp)-associated factor, rna polymerase i, d, 41kda, BRCA2 - breast cancer 2, early onset, ELK1 - elk1, member of ets o…
GO:0080090	regulation of primary metabolic process	2.66e-06	0.00715	1.19	4045	1616	709	338	[TOB1 - transducer of erbb2, 1, CREB5 - camp responsive element binding protein 5, CCNK - cyclin k, PCGF5 - polycomb group ring finger 5, WTAP - wilms tumor 1 associated protein, RFC2 - replication factor c (activator 1) 2, 40kda, CASZ1 - castor zinc finger 1, RBM39 - rna binding motif protein 39, TAF1D - tata box binding protein (tbp)-associated factor, rna polymerase i, d, 41kda, MAP3K8 - mitog…
GO:0019219	regulation of nucleobase-containing compound metabolic process	2.31e-06	0.00827	1.26	4045	1140	709	251	[CCNK - cyclin k, CREB5 - camp responsive element binding protein 5, TOB1 - transducer of erbb2, 1, PCGF5 - polycomb group ring finger 5, WTAP - wilms tumor 1 associated protein, RFC2 - replication factor c (activator 1) 2, 40kda, CASZ1 - castor zinc finger 1, RBM39 - rna binding motif protein 39, TAF1D - tata box binding protein (tbp)-associated factor, rna polymerase i, d, 41kda, BRCA2 - breast…
GO:0060255	regulation of macromolecule metabolic process	9.82e-07	0.0106	1.2	4045	1619	709	341	[TOB1 - transducer of erbb2, 1, CREB5 - camp responsive element binding protein 5, CCNK - cyclin k, PCGF5 - polycomb group ring finger 5, WTAP - wilms tumor 1 associated protein, RFC2 - replication factor c (activator 1) 2, 40kda, CASZ1 - castor zinc finger 1, RBM39 - rna binding motif protein 39, TAF1D - tata box binding protein (tbp)-associated factor, rna polymerase i, d, 41kda, MAP3K8 - mitog…
GO:0043408	regulation of MAPK cascade	7.37e-06	0.0113	1.7	4045	201	709	60	[MAP3K8 - mitogen-activated protein kinase kinase kinase 8, FLT1 - fms-related tyrosine kinase 1, TNFRSF10A - tumor necrosis factor receptor superfamily, member 10a, VANGL2 - vangl planar cell polarity protein 2, INHBA - inhibin, beta a, STK39 - serine threonine kinase 39, ATF3 - activating transcription factor 3, BANK1 - b-cell scaffold protein with ankyrin repeats 1, MAP3K11 - mitogen-activated…
GO:0051171	regulation of nitrogen compound metabolic process	2.12e-06	0.0114	1.2	4045	1574	709	331	[TOB1 - transducer of erbb2, 1, CREB5 - camp responsive element binding protein 5, CCNK - cyclin k, PCGF5 - polycomb group ring finger 5, WTAP - wilms tumor 1 associated protein, RFC2 - replication factor c (activator 1) 2, 40kda, CASZ1 - castor zinc finger 1, RBM39 - rna binding motif protein 39, TAF1D - tata box binding protein (tbp)-associated factor, rna polymerase i, d, 41kda, MAP3K8 - mitog…
GO:0051252	regulation of RNA metabolic process	7.2e-06	0.0129	1.25	4045	1064	709	234	[CCNK - cyclin k, CREB5 - camp responsive element binding protein 5, TOB1 - transducer of erbb2, 1, PCGF5 - polycomb group ring finger 5, WTAP - wilms tumor 1 associated protein, CASZ1 - castor zinc finger 1, RBM39 - rna binding motif protein 39, TAF1D - tata box binding protein (tbp)-associated factor, rna polymerase i, d, 41kda, BRCA2 - breast cancer 2, early onset, ELK1 - elk1, member of ets o…
GO:0019222	regulation of metabolic process	1.03e-05	0.0139	1.17	4045	1742	709	357	[TOB1 - transducer of erbb2, 1, CREB5 - camp responsive element binding protein 5, CCNK - cyclin k, PCGF5 - polycomb group ring finger 5, WTAP - wilms tumor 1 associated protein, RFC2 - replication factor c (activator 1) 2, 40kda, CASZ1 - castor zinc finger 1, RBM39 - rna binding motif protein 39, TAF1D - tata box binding protein (tbp)-associated factor, rna polymerase i, d, 41kda, MAP3K8 - mitog…
GO:0031323	regulation of cellular metabolic process	1.84e-05	0.018	1.17	4045	1650	709	339	[TOB1 - transducer of erbb2, 1, CREB5 - camp responsive element binding protein 5, CCNK - cyclin k, PCGF5 - polycomb group ring finger 5, WTAP - wilms tumor 1 associated protein, RFC2 - replication factor c (activator 1) 2, 40kda, CASZ1 - castor zinc finger 1, RBM39 - rna binding motif protein 39, TAF1D - tata box binding protein (tbp)-associated factor, rna polymerase i, d, 41kda, MAP3K8 - mitog…
GO:0016070	RNA metabolic process	1.55e-05	0.0185	1.27	4045	926	709	206	[CREB5 - camp responsive element binding protein 5, CCNK - cyclin k, PCGF5 - polycomb group ring finger 5, WTAP - wilms tumor 1 associated protein, ZCCHC8 - zinc finger, cchc domain containing 8, CASZ1 - castor zinc finger 1, RBM39 - rna binding motif protein 39, TAF1D - tata box binding protein (tbp)-associated factor, rna polymerase i, d, 41kda, ELK1 - elk1, member of ets oncogene family, WHSC1…
GO:0006954	inflammatory response	1.75e-05	0.0188	1.83	4045	137	709	44	[DHX9 - deah (asp-glu-ala-his) box helicase 9, TNFRSF9 - tumor necrosis factor receptor superfamily, member 9, IL18 - interleukin 18 (interferon-gamma-inducing factor), PTX3 - pentraxin 3, long, IFNA2 - interferon, alpha 2, SPP1 - secreted phosphoprotein 1, TNFRSF10A - tumor necrosis factor receptor superfamily, member 10a, ACVR1 - activin a receptor, type i, PTGER3 - prostaglandin e receptor 3 (…
GO:2001141	regulation of RNA biosynthetic process	2.34e-05	0.0209	1.25	4045	984	709	216	[CCNK - cyclin k, CREB5 - camp responsive element binding protein 5, TOB1 - transducer of erbb2, 1, PCGF5 - polycomb group ring finger 5, CASZ1 - castor zinc finger 1, RBM39 - rna binding motif protein 39, TAF1D - tata box binding protein (tbp)-associated factor, rna polymerase i, d, 41kda, BRCA2 - breast cancer 2, early onset, ELK1 - elk1, member of ets oncogene family, WHSC1L1 - wolf-hirschhorn…
GO:0010556	regulation of macromolecule biosynthetic process	2.59e-05	0.0214	1.23	4045	1140	709	245	[CCNK - cyclin k, CREB5 - camp responsive element binding protein 5, TOB1 - transducer of erbb2, 1, PCGF5 - polycomb group ring finger 5, RFC2 - replication factor c (activator 1) 2, 40kda, CASZ1 - castor zinc finger 1, RBM39 - rna binding motif protein 39, TAF1D - tata box binding protein (tbp)-associated factor, rna polymerase i, d, 41kda, BRCA2 - breast cancer 2, early onset, ELK1 - elk1, memb…
GO:0009889	regulation of biosynthetic process	2.81e-05	0.0216	1.22	4045	1195	709	255	[CCNK - cyclin k, CREB5 - camp responsive element binding protein 5, TOB1 - transducer of erbb2, 1, PCGF5 - polycomb group ring finger 5, RFC2 - replication factor c (activator 1) 2, 40kda, CASZ1 - castor zinc finger 1, RBM39 - rna binding motif protein 39, TAF1D - tata box binding protein (tbp)-associated factor, rna polymerase i, d, 41kda, BRCA2 - breast cancer 2, early onset, ELK1 - elk1, memb…
GO:0032496	response to lipopolysaccharide	3.44e-05	0.0231	1.96	4045	99	709	34	[TNFRSF9 - tumor necrosis factor receptor superfamily, member 9, SBNO2 - strawberry notch homolog 2 (drosophila), LTA - lymphotoxin alpha, LITAF - lipopolysaccharide-induced tnf factor, TNFRSF10A - tumor necrosis factor receptor superfamily, member 10a, CD274 - cd274 molecule, PTGER4 - prostaglandin e receptor 4 (subtype ep4), PTGIR - prostaglandin i2 (prostacyclin) receptor (ip), PTGS2 - prostag…
GO:0002237	response to molecule of bacterial origin	3.37e-05	0.0242	1.92	4045	107	709	36	[TNFRSF9 - tumor necrosis factor receptor superfamily, member 9, SBNO2 - strawberry notch homolog 2 (drosophila), LTA - lymphotoxin alpha, LITAF - lipopolysaccharide-induced tnf factor, TNFRSF10A - tumor necrosis factor receptor superfamily, member 10a, CD274 - cd274 molecule, PTGER4 - prostaglandin e receptor 4 (subtype ep4), PTGIR - prostaglandin i2 (prostacyclin) receptor (ip), TLR2 - toll-lik…
GO:1903506	regulation of nucleic acid-templated transcription	4.11e-05	0.026	1.24	4045	981	709	214	[CCNK - cyclin k, CREB5 - camp responsive element binding protein 5, TOB1 - transducer of erbb2, 1, PCGF5 - polycomb group ring finger 5, CASZ1 - castor zinc finger 1, RBM39 - rna binding motif protein 39, TAF1D - tata box binding protein (tbp)-associated factor, rna polymerase i, d, 41kda, BRCA2 - breast cancer 2, early onset, ELK1 - elk1, member of ets oncogene family, WHSC1L1 - wolf-hirschhorn…
GO:2000112	regulation of cellular macromolecule biosynthetic process	5.07e-05	0.026	1.22	4045	1112	709	238	[CCNK - cyclin k, CREB5 - camp responsive element binding protein 5, TOB1 - transducer of erbb2, 1, PCGF5 - polycomb group ring finger 5, RFC2 - replication factor c (activator 1) 2, 40kda, CASZ1 - castor zinc finger 1, RBM39 - rna binding motif protein 39, TAF1D - tata box binding protein (tbp)-associated factor, rna polymerase i, d, 41kda, BRCA2 - breast cancer 2, early onset, ELK1 - elk1, memb…
GO:0006355	regulation of transcription, DNA-templated	5.34e-05	0.0261	1.24	4045	974	709	212	[CCNK - cyclin k, CREB5 - camp responsive element binding protein 5, TOB1 - transducer of erbb2, 1, PCGF5 - polycomb group ring finger 5, CASZ1 - castor zinc finger 1, RBM39 - rna binding motif protein 39, TAF1D - tata box binding protein (tbp)-associated factor, rna polymerase i, d, 41kda, BRCA2 - breast cancer 2, early onset, ELK1 - elk1, member of ets oncogene family, WHSC1L1 - wolf-hirschhorn…
GO:0071900	regulation of protein serine/threonine kinase activity	4.47e-05	0.0267	1.69	4045	172	709	51	[CCNK - cyclin k, WNK1 - wnk lysine deficient protein kinase 1, MAP3K8 - mitogen-activated protein kinase kinase kinase 8, FLT1 - fms-related tyrosine kinase 1, TNFRSF10A - tumor necrosis factor receptor superfamily, member 10a, VANGL2 - vangl planar cell polarity protein 2, STK39 - serine threonine kinase 39, LATS1 - large tumor suppressor kinase 1, MAP3K11 - mitogen-activated protein kinase kin…
GO:0031326	regulation of cellular biosynthetic process	5.07e-05	0.0273	1.21	4045	1182	709	251	[CCNK - cyclin k, CREB5 - camp responsive element binding protein 5, TOB1 - transducer of erbb2, 1, PCGF5 - polycomb group ring finger 5, RFC2 - replication factor c (activator 1) 2, 40kda, CASZ1 - castor zinc finger 1, RBM39 - rna binding motif protein 39, TAF1D - tata box binding protein (tbp)-associated factor, rna polymerase i, d, 41kda, BRCA2 - breast cancer 2, early onset, ELK1 - elk1, memb…
GO:1902531	regulation of intracellular signal transduction	4.92e-05	0.0278	1.35	4045	554	709	131	[ARAP2 - arfgap with rhogap domain, ankyrin repeat and ph domain 2, IL18 - interleukin 18 (interferon-gamma-inducing factor), RFC2 - replication factor c (activator 1) 2, 40kda, MAP3K8 - mitogen-activated protein kinase kinase kinase 8, FLT1 - fms-related tyrosine kinase 1, TNFRSF10A - tumor necrosis factor receptor superfamily, member 10a, VANGL2 - vangl planar cell polarity protein 2, ARHGAP10 …
GO:0043405	regulation of MAP kinase activity	6.95e-05	0.0325	1.8	4045	127	709	40	[MAP3K8 - mitogen-activated protein kinase kinase kinase 8, FLT1 - fms-related tyrosine kinase 1, ERN1 - endoplasmic reticulum to nucleus signaling 1, RAF1 - v-raf-1 murine leukemia viral oncogene homolog 1, PDGFB - platelet-derived growth factor beta polypeptide, VANGL2 - vangl planar cell polarity protein 2, SPRED1 - sprouty-related, evh1 domain containing 1, SPAG9 - sperm associated antigen 9,…
GO:0031401	positive regulation of protein modification process	7.97e-05	0.0357	1.46	4045	328	709	84	[CCNK - cyclin k, FMR1 - fragile x mental retardation 1, IL18 - interleukin 18 (interferon-gamma-inducing factor), WNK1 - wnk lysine deficient protein kinase 1, PHF19 - phd finger protein 19, MAP3K8 - mitogen-activated protein kinase kinase kinase 8, FLT1 - fms-related tyrosine kinase 1, IFNA2 - interferon, alpha 2, TNFRSF10A - tumor necrosis factor receptor superfamily, member 10a, VANGL2 - vang…
GO:0032774	RNA biosynthetic process	9.65e-05	0.0415	1.29	4045	689	709	156	[DHX9 - deah (asp-glu-ala-his) box helicase 9, CREB5 - camp responsive element binding protein 5, CCNK - cyclin k, PCGF5 - polycomb group ring finger 5, ZNF189 - zinc finger protein 189, SRSF11 - serine/arginine-rich splicing factor 11, CASZ1 - castor zinc finger 1, RBM39 - rna binding motif protein 39, ARID4B - at rich interactive domain 4b (rbp1-like), TAF1D - tata box binding protein (tbp)-ass…

## Sheet: Cluster IV - Flu and IFN down
None
