# Supplementary material for: Genetic analysis of isoform usage in the human anti-viral response reveals influenza-specific regulation of ERAP2 transcripts under balancing selection
Source: Genome Res. 2018 Dec;28(12):1812–25. doi: 10.1101/gr.240390.118 (PMC6280757; doi:10.1101/gr.240390.118)
Supplement: Supplemental Material [file supp_gr.240390.118_SupplementalTable6.xlsx]

## Sheet: baseline 4PCs
SNP	gene	beta	t-stat	p-value	FDR	gene.p.min.p	emp.p	emp.q
chr4:39455378_rs2249563	TCONS_00024757_RPL9	26.9371	51.7312	7.5372e-60	1.08098e-53	7.5372e-60	0.001	0.0114827
chr1:39509034_rs4661004	TCONS_00000397_NDUFS5	25.7492	49.3564	2.21546e-58	3.19746e-52	2.21546e-58	0.001	0.0114827
chr1:39509034_rs4661004	TCONS_00000398_NDUFS5	-25.7492	-49.3564	2.21546e-58	3.19746e-52	2.21546e-58	0.001	0.0114827
chr1:179863922_rs514421	TCONS_00001440_TOR1AIP1	42.6707	41.0564	1.1374e-52	3.16714e-47	1.1374e-52	0.001	0.0114827
chr19:35507073_rs59344976	TCONS_00015644_GRAMD1A	-31.1624	-38.3363	1.44956e-50	3.17434e-44	1.44956e-50	0.001	0.0114827
chr12:113357193_rs10774671	TCONS_00007433_OAS1	-31.9038	-35.6129	2.56581e-48	1.76648e-41	2.56581e-48	0.001	0.0114827
chr3:39449137_rs1803893	TCONS_00022346_RPSA	-44.4396	-33.7699	1.04536e-46	1.21543e-40	1.04536e-46	0.001	0.0114827
chr3:39449137_rs1803893	TCONS_00022345_RPSA	44.4396	33.7699	1.04536e-46	1.21543e-40	1.04536e-46	0.001	0.0114827
chr14:100827508_rs2146106	TCONS_00010022_WARS	24.0019	31.6005	1.03865e-44	8.58207e-39	1.03865e-44	0.001	0.0114827
chr19:57006415_rs17207481	TCONS_00016310_ZNF667-AS1	38.767	31.5636	1.12582e-44	8.49921e-39	1.12582e-44	0.001	0.0114827
chr19:57006415_rs17207481	TCONS_00016311_ZNF667-AS1	-38.767	-31.5636	1.12582e-44	8.49921e-39	1.12582e-44	0.001	0.0114827
chr17:7145981_rs222843	TCONS_00012735_ELP5	-16.7505	-30.4874	1.22382e-43	5.70654e-37	1.22382e-43	0.001	0.0114827
chr16:2014283_rs2286466	TCONS_00012019_TCRBV20S1	27.354	28.4845	1.26556e-41	6.72941e-35	1.26556e-41	0.001	0.0114827
chr12:113357193_rs10774671	TCONS_00007435_OAS1	45.5075	28.1495	2.82386e-41	9.72069e-35	2.82386e-41	0.001	0.0114827
chr16:2014283_rs2286466	TCONS_00012017_TCRBV20S1	-17.8094	-27.9585	4.47756e-41	7.93625e-35	4.47756e-41	0.001	0.0114827
chr7:128597804_rs17166351	TCONS_00029311_IRF5	31.1782	26.8364	7.09221e-40	5.21965e-34	7.09221e-40	0.001	0.0114827
chr11:77659512_rs12284929	TCONS_00006459_INTS4	5.16123	26.4615	1.82324e-39	9.40854e-34	1.82324e-39	0.001	0.0114827
chr7:128597804_rs17166351	TCONS_00029309_IRF5	-23.2471	-26.2673	2.98608e-39	9.07356e-34	2.98608e-39	0.001	0.0114827
chr7:128597804_rs17166351	TCONS_00029319_IRF5	-23.4917	-25.3644	3.07801e-38	4.51715e-33	3.07801e-38	0.001	0.0114827
chr6:31555392_rs2256974	TCONS_00027044_LST1	-10.7751	-25.3164	3.49117e-38	2.64682e-31	3.49117e-38	0.001	0.0114827
chr10:33213251_rs2488328	TCONS_00004361_ITGB1	-9.71782	-24.8474	1.20627e-37	7.15685e-32	1.20627e-37	0.001	0.0114827
chr10:33213251_rs2488328	TCONS_00004360_ITGB1	9.71782	24.8474	1.20627e-37	7.15685e-32	1.20627e-37	0.001	0.0114827
chr12:131315610_rs4759524	TCONS_00008403_STX2	-8.85698	-24.7502	1.56365e-37	7.93389e-33	1.56365e-37	0.001	0.0114827
chr5:96076487_rs7724759	TCONS_00025624_CAST	11.3554	24.69	1.83645e-37	4.46774e-32	1.83645e-37	0.001	0.0114827
chr5:96076487_rs7724759	TCONS_00025642_CAST	-11.3554	-24.69	1.83645e-37	4.46774e-32	1.83645e-37	0.001	0.0114827
chr9:107505262_rs7034016	TCONS_00031819_NIPSNAP3A	16.9676	24.453	3.47218e-37	8.87871e-31	3.47218e-37	0.001	0.0114827
chr9:107505262_rs7034016	TCONS_00031818_NIPSNAP3A	-16.9676	-24.453	3.47218e-37	8.87871e-31	3.47218e-37	0.001	0.0114827
chr1:207943158_rs2724360	TCONS_00001665_CD46	24.9226	24.2748	5.62351e-37	4.42771e-32	5.62351e-37	0.001	0.0114827
chr11:60152584_rs950802	TCONS_00005120_MS4A7	-27.0185	-23.1002	1.44716e-35	2.24141e-30	1.44716e-35	0.001	0.0114827
chr11:60152584_rs950802	TCONS_00005121_MS4A7	29.0543	22.6911	4.61994e-35	6.99287e-30	4.61994e-35	0.001	0.0114827
chr1:53432786_rs56222568	TCONS_00000519_SCP2	16.4093	22.5089	7.78558e-35	5.55534e-30	7.78558e-35	0.001	0.0114827
chr1:53432786_rs56222568	TCONS_00000520_SCP2	-16.4093	-22.5089	7.78558e-35	5.55534e-30	7.78558e-35	0.001	0.0114827
chr8:86106269_rs2896453	TCONS_00031122_C8orf59	-19.8875	-22.3634	1.18421e-34	2.64693e-28	1.18421e-34	0.001	0.0114827
chr8:86106269_rs2896453	TCONS_00031123_C8orf59	19.8875	22.3634	1.18421e-34	2.64693e-28	1.18421e-34	0.001	0.0114827
chr7:128597804_rs17166351	TCONS_00029310_IRF5	15.5606	22.2465	1.66094e-34	1.45618e-29	1.66094e-34	0.001	0.0114827
chr14:96846092_rs2053588	TCONS_00009536_GSKIP	45.2079	22.0829	2.67195e-34	7.6101e-29	2.67195e-34	0.001	0.0114827
chr14:96846092_rs2053588	TCONS_00009537_GSKIP	-45.2079	-22.0829	2.67195e-34	7.6101e-29	2.67195e-34	0.001	0.0114827
chr17:7525548_rs1017163	TCONS_00013776_SAT2	-14.8843	-21.2447	3.18591e-33	1.85132e-27	3.18591e-33	0.001	0.0114827
chr19:9533805_rs6512121	TCONS_00016515_ZNF266	21.0754	19.9273	1.81279e-31	4.66892e-26	1.81279e-31	0.001	0.0114827
chr19:41939297_rs1043413	TCONS_00016890_ATP5SL	-19.6769	-19.6419	4.45884e-31	6.0834e-26	4.45884e-31	0.001	0.0114827
chr19:41939297_rs1043413	TCONS_00016889_ATP5SL	19.6769	19.6419	4.45884e-31	6.0834e-26	4.45884e-31	0.001	0.0114827
chr6:32630225_rs9274126	TCONS_00028024_HLA-DQB2	-28.3578	-19.0098	3.37916e-30	1.28095e-23	3.37916e-30	0.001	0.0114827
chr3:53208782_rs6778964	TCONS_00022565_PRKCD	17.051	18.966	3.89547e-30	2.44779e-24	3.89547e-30	0.001	0.0114827
chr14:91622583_rs28548905	TCONS_00009497_C14orf159	-39.182	-18.7596	7.62967e-30	1.73793e-24	7.62967e-30	0.001	0.0114827
chr19:51736383_rs33978622	TCONS_00015988_CD33	-10.8315	-18.7479	7.92521e-30	8.38743e-25	7.92521e-30	0.001	0.0114827
chr6:32614360_rs115443066	TCONS_00027144_HLA-DQA1	-36.3977	-18.7411	8.10536e-30	1.68636e-23	8.10536e-30	0.001	0.0114827
chr4:119131353_rs17626497	TCONS_00024464_SNHG8	14.8656	18.6158	1.22207e-29	2.38756e-24	1.22207e-29	0.001	0.0114827
chr4:119131353_rs17626497	TCONS_00024463_SNHG8	-14.8656	-18.6158	1.22207e-29	2.38756e-24	1.22207e-29	0.001	0.0114827
chr12:58112189_rs799265	TCONS_00007188_OS9	5.22643	18.3397	3.03988e-29	7.24173e-25	3.03988e-29	0.001	0.0114827
chr1:173820331_rs143782258	TCONS_00003035_GAS5	18.9959	18.136	5.98897e-29	3.54271e-24	5.98897e-29	0.001	0.0114827
chr8:124157948_rs7006208	TCONS_00030734_WDR67	-48.2662	-18.1008	6.73668e-29	1.34088e-23	6.73668e-29	0.001	0.0114827
chr8:124157948_rs7006208	TCONS_00030733_WDR67	48.2662	18.1008	6.73668e-29	1.34088e-23	6.73668e-29	0.001	0.0114827
chr11:58376276_rs7927966	TCONS_00005083_ZFP91	17.1732	17.1294	1.83661e-27	1.51009e-22	1.83661e-27	0.001	0.0114827
chr11:58376276_rs7927966	TCONS_00005085_ZFP91	-17.1732	-17.1294	1.83661e-27	1.51009e-22	1.83661e-27	0.001	0.0114827
chr6:32629110_rs9273608	TCONS_00027137_HLA-DQA1	47.2837	16.87	4.52533e-27	2.45063e-22	4.52533e-27	0.001	0.0114827
chr9:139357273_rs55824202	TCONS_00032758_SEC16A	-13.2173	-16.7568	6.72523e-27	1.81022e-21	6.72523e-27	0.001	0.0114827
chr10:16863161_rs780633	TCONS_00004290_RSU1	3.41205	16.5555	1.3662e-26	2.46054e-21	1.3662e-26	0.001	0.0114827
chr10:99439673_rs3818780	TCONS_00004581_AVPI1	53.0262	16.5159	1.57131e-26	2.46054e-21	1.57131e-26	0.001	0.0114827
chr10:99439673_rs3818780	TCONS_00004580_AVPI1	-53.0262	-16.5159	1.57131e-26	2.46054e-21	1.57131e-26	0.001	0.0114827
chr7:92769662_rs6974267	TCONS_00029941_SAMD9L	-27.2002	-16.4487	1.99307e-26	1.11196e-21	1.99307e-26	0.001	0.0114827
chr11:60152584_rs950802	TCONS_00005123_MS4A14	30.3141	16.2473	4.08114e-26	2.58859e-21	4.08114e-26	0.001	0.0114827
chr11:60152584_rs950802	TCONS_00005128_MS4A14	-30.3141	-16.2473	4.08114e-26	2.58859e-21	4.08114e-26	0.001	0.0114827
chr1:158324425_rs1065457	TCONS_00001185_CD1E	6.54701	16.0558	8.10504e-26	3.90433e-21	8.10504e-26	0.001	0.0114827
chr11:502217_rs7944548	TCONS_00005791_RNH1	-7.32561	-16.007	9.66002e-26	6.06937e-21	9.66002e-26	0.001	0.0114827
chr12:102121093_rs4764650	TCONS_00008092_GNPTAB	12.9533	15.7698	2.27768e-25	5.15826e-21	2.27768e-25	0.001	0.0114827
chr12:102121093_rs4764650	TCONS_00008091_GNPTAB	-12.9533	-15.7698	2.27768e-25	5.15826e-21	2.27768e-25	0.001	0.0114827
chr9:32455320_rs7029002	TCONS_00032205_DDX58	-11.9649	-15.453	7.23841e-25	1.08878e-19	7.23841e-25	0.001	0.0114827
chr11:502217_rs7944548	TCONS_00005796_RNH1	-4.54451	-15.4526	7.24865e-25	4.26814e-20	7.24865e-25	0.001	0.0114827
chr22:45797954_rs4605479	TCONS_00021637_FAM118A	43.7291	15.0879	2.78884e-24	5.66036e-19	2.78884e-24	0.001	0.0114827
chr22:45797954_rs4605479	TCONS_00021636_FAM118A	-43.7291	-15.0879	2.78884e-24	5.66036e-19	2.78884e-24	0.001	0.0114827
chr16:2011126_rs758335	TCONS_00012016_TCRBV20S1	-9.43714	-15.0755	2.91982e-24	1.03505e-18	2.91982e-24	0.001	0.0114827
chr4:76832856_rs2135232	TCONS_00024834_NAAA	-9.20814	-14.8927	5.77471e-24	3.36001e-19	5.77471e-24	0.001	0.0114827
chr20:34251982_rs73905926	TCONS_00020670_CPNE1	-15.0722	-14.8413	7.00184e-24	1.77177e-18	7.00184e-24	0.001	0.0114827
chr10:28800170_rs2993987	TCONS_00004327_WAC-AS1	-15.2062	-14.7636	9.37013e-24	7.25489e-19	9.37013e-24	0.001	0.0114827
chr20:1895835_rs17855612	TCONS_00019809_SIRPA	-20.434	-14.5689	1.95316e-23	2.52295e-18	1.95316e-23	0.001	0.0114827
chr20:1895835_rs17855612	TCONS_00019803_SIRPA	20.434	14.5689	1.95316e-23	2.52295e-18	1.95316e-23	0.001	0.0114827
chr4:83903895_rs2868708	TCONS_00024889_SEC31A	-1.74755	-14.5098	2.44308e-23	1.3261e-18	2.44308e-23	0.001	0.0114827
chr4:83903895_rs2868708	TCONS_00024903_SEC31A	1.74755	14.5098	2.44308e-23	1.3261e-18	2.44308e-23	0.001	0.0114827
chr6:32559520_rs11751601	TCONS_00027142_HLA-DQA1	-36.36	-14.2327	7.01787e-23	1.36776e-18	7.01787e-23	0.001	0.0114827
chr1:218475441_rs11118073	TCONS_00001707_RRP15	24.9219	14.1555	9.43454e-23	3.63889e-18	9.43454e-23	0.001	0.0114827
chr1:218475441_rs11118073	TCONS_00001708_RRP15	-24.9219	-14.1555	9.43454e-23	3.63889e-18	9.43454e-23	0.001	0.0114827
chr2:218939511_rs4672869	TCONS_00018504_RUFY4	16.72	14.076	1.28002e-22	4.63072e-16	1.28002e-22	0.001	0.0114827
chr14:20881527_rs1713434	TCONS_00009624_TEP1	28.1551	13.8188	3.45745e-22	1.77963e-17	3.45745e-22	0.001	0.0114827
chr14:20881527_rs1713434	TCONS_00009625_TEP1	-28.1551	-13.8188	3.45745e-22	1.77963e-17	3.45745e-22	0.001	0.0114827
chr5:35874575_rs6897932	TCONS_00025356_IL7R	-17.5662	-13.792	3.83636e-22	3.8024e-17	3.83636e-22	0.001	0.0114827
chr5:35874575_rs6897932	TCONS_00025357_IL7R	17.5662	13.792	3.83636e-22	3.8024e-17	3.83636e-22	0.001	0.0114827
chr14:91622583_rs28548905	TCONS_00009496_C14orf159	33.8317	13.7279	4.92108e-22	2.50285e-17	4.92108e-22	0.001	0.0114827
chr11:504636_rs79095790	TCONS_00005797_RNH1	13.5364	13.6629	6.34031e-22	2.58268e-17	6.34031e-22	0.001	0.0114827
chr2:223766279_rs6719075	TCONS_00018585_ACSL3	-11.1169	-13.5873	8.51526e-22	8.06353e-16	8.51526e-22	0.001	0.0114827
chr6:86223316_rs12203963	TCONS_00028312_SNHG5	15.633	13.5644	9.3143e-22	1.26553e-17	9.3143e-22	0.001	0.0114827
chr2:170463547_rs72623200	TCONS_00018195_PPIG	-33.2428	-13.5042	1.17869e-21	8.06353e-16	1.17869e-21	0.001	0.0114827
chr9:32455320_rs7029002	TCONS_00032198_DDX58	13.2692	13.3664	2.02539e-21	1.61847e-16	2.02539e-21	0.001	0.0114827
chr14:100832282_rs2146105	TCONS_00010037_WARS	-15.4216	-13.3578	2.09472e-21	9.83417e-17	2.09472e-21	0.001	0.0114827
chr2:170463547_rs72623200	TCONS_00018194_PPIG	30.7772	13.3043	2.58669e-21	1.24911e-15	2.58669e-21	0.001	0.0114827
chr10:16861400_rs780632	TCONS_00004287_RSU1	-2.67991	-13.2665	3.00288e-21	1.55752e-16	3.00288e-21	0.001	0.0114827
chr15:75130093_rs12898397	TCONS_00010981_ULK3	-26.7501	-13.1855	4.13566e-21	1.6833e-14	4.13566e-21	0.001	0.0114827
chr19:55824586_rs4806659	TCONS_00017410_TMEM150B	8.87604	13.1825	4.18553e-21	1.5761e-16	4.18553e-21	0.001	0.0114827
chr12:9866349_rs7977720	TCONS_00007662_CLECL1	-11.172	-12.9913	8.94217e-21	1.7391e-16	8.94217e-21	0.001	0.0114827
chr10:45479872_rs914703	TCONS_00003695_RASSF4	8.17809	12.9861	9.12929e-21	3.72306e-16	9.12929e-21	0.001	0.0114827
chr10:45479872_rs914703	TCONS_00003696_RASSF4	-8.17809	-12.9861	9.12929e-21	3.72306e-16	9.12929e-21	0.001	0.0114827
chr2:218936037_rs4074802	TCONS_00018527_RUFY4	-9.13025	-12.9394	1.09987e-20	3.75414e-15	1.09987e-20	0.001	0.0114827
chr18:5239939_rs16947934	TCONS_00014785_LINC00667	-16.697	-12.8276	1.71891e-20	1.86591e-15	1.71891e-20	0.001	0.0114827
chr7:150026339_rs11765644	TCONS_00029433_LRRC61	11.8639	12.79	1.99856e-20	7.5373e-16	1.99856e-20	0.001	0.0114827
chr6:32626696_rs34865969	TCONS_00028023_HLA-DQB2	97.2897	12.726	2.58368e-20	2.64705e-16	2.58368e-20	0.001	0.0114827
chr12:113357193_rs10774671	TCONS_00007432_OAS1	-13.6038	-12.7174	2.67449e-20	5.07245e-16	2.67449e-20	0.001	0.0114827
chr11:77840301_rs585486	TCONS_00006462_ALG8	13.7862	12.6204	3.95006e-20	1.00181e-15	3.95006e-20	0.001	0.0114827
chr11:77840301_rs585486	TCONS_00006463_ALG8	-13.7862	-12.6204	3.95006e-20	1.00181e-15	3.95006e-20	0.001	0.0114827
chr14:65400069_rs11158569	TCONS_00009347_CHURC1-FNTB	3.67256	12.5179	5.97341e-20	2.40752e-15	5.97341e-20	0.001	0.0114827
chr6:46657057_rs3799277	TCONS_00028233_PLA2G7	-7.34388	-12.512	6.11611e-20	5.96241e-16	6.11611e-20	0.001	0.0114827
chr4:169317279_rs3857035	TCONS_00025115_DDX60L	-15.0612	-12.4663	7.35789e-20	1.45339e-15	7.35789e-20	0.001	0.0114827
chr19:51727962_rs3865444	TCONS_00015985_CD33	18.1369	12.4564	7.65719e-20	2.5654e-15	7.65719e-20	0.001	0.0114827
chr15:75130093_rs12898397	TCONS_00010982_ULK3	27.1974	12.3139	1.3653e-19	2.77853e-13	1.3653e-19	0.001	0.0114827
chr3:48190914_rs6442107	TCONS_00022427_ZNF589	7.81265	12.2711	1.62436e-19	4.6782e-14	1.62436e-19	0.001	0.0114827
chr19:55831088_rs2384688	TCONS_00017409_TMEM150B	-7.49218	-12.2435	1.81778e-19	5.89817e-15	1.81778e-19	0.001	0.0114827
chr19:55142930_rs3843752	TCONS_00016051_LILRA2	-19.0125	-12.0626	3.80403e-19	1.17849e-14	3.80403e-19	0.001	0.0114827
chr19:55142930_rs3843752	TCONS_00016050_LILRA2	19.0125	12.0626	3.80403e-19	1.17849e-14	3.80403e-19	0.001	0.0114827
chr12:109013319_rs73191241	TCONS_00008136_CORO1C	-29.5802	-12.0574	3.88654e-19	7.13535e-15	3.88654e-19	0.001	0.0114827
chr11:66216815_rs1700184	TCONS_00005346_DPP3	-13.4123	-11.9996	4.92489e-19	6.38124e-15	4.92489e-19	0.001	0.0114827
chr1:179863922_rs514421	TCONS_00001439_TOR1AIP1	-31.7736	-11.8362	9.64117e-19	2.88142e-14	9.64117e-19	0.001	0.0114827
chr19:9533805_rs6512121	TCONS_00016512_ZNF266	-11.645	-11.8204	1.02886e-18	2.92002e-14	1.02886e-18	0.001	0.0114827
chr11:34872901_rs17711539	TCONS_00006051_APIP	-9.19705	-11.6766	1.86259e-18	2.22707e-14	1.86259e-18	0.001	0.0114827
chr11:34872901_rs17711539	TCONS_00006052_APIP	9.19705	11.6766	1.86259e-18	2.22707e-14	1.86259e-18	0.001	0.0114827
chr2:218936546_rs7355423	TCONS_00019635_CXCR2P1	-4.26427	-11.6495	2.08395e-18	3.97444e-13	2.08395e-18	0.001	0.0114827
chr5:179264731_rs10277	TCONS_00141537_add_C5orf45	-10.3666	-11.5001	3.87339e-18	2.80151e-13	3.87339e-18	0.001	0.0114827
chr5:179264731_rs10277	TCONS_00141538_add_C5orf45	10.3666	11.5001	3.87339e-18	2.80151e-13	3.87339e-18	0.001	0.0114827
chr15:50760171_rs112743474	TCONS_00010305_USP8	-14.3402	-11.4945	3.9635e-18	2.9504e-12	3.9635e-18	0.001	0.0114827
chr15:50760171_rs112743474	TCONS_00010308_USP8	14.3402	11.4945	3.9635e-18	2.9504e-12	3.9635e-18	0.001	0.0114827
chr17:7498191_rs858527	TCONS_00013774_SAT2	11.8482	11.2315	1.18719e-17	2.04926e-12	1.18719e-17	0.001	0.0114827
chr8:145596535_rs75674422	TCONS_00031422_CPSF1	-9.85263	-11.221	1.24036e-17	5.04081e-13	1.24036e-17	0.001	0.0114827
chr8:145596535_rs75674422	TCONS_00031423_CPSF1	9.85263	11.221	1.24036e-17	5.04081e-13	1.24036e-17	0.001	0.0114827
chr2:202012068_rs13387186	TCONS_00018382_CFLAR	2.6624	11.1362	1.76967e-17	2.3816e-12	1.76967e-17	0.001	0.0114827
chr22:36597556_rs132725	TCONS_00021864_APOL4	-22.6673	-11.0957	2.09752e-17	6.54958e-13	2.09752e-17	0.001	0.0114827
chr3:188066953_rs6787621	TCONS_00023111_LPP	16.4654	11.0714	2.32314e-17	4.58791e-12	2.32314e-17	0.001	0.0114827
chr19:35507568_rs77340619	TCONS_00015648_GRAMD1A	25.256	11.0283	2.78403e-17	5.88182e-13	2.78403e-17	0.001	0.0114827
chr11:60050125_rs10792260	TCONS_00005113_MS4A4A	7.05446	10.9404	4.03004e-17	3.64178e-13	4.03004e-17	0.001	0.0114827
chr11:60050125_rs10792260	TCONS_00005116_MS4A4A	-7.05446	-10.9404	4.03004e-17	3.64178e-13	4.03004e-17	0.001	0.0114827
chr9:134449234_rs13292149	TCONS_00032685_RAPGEF1	-14.2885	-10.8856	5.07711e-17	3.46205e-12	5.07711e-17	0.001	0.0114827
chr17:46125978_rs2285863	TCONS_00013254_SNX11	9.4973	10.8459	6.005e-17	8.27011e-12	6.005e-17	0.001	0.0114827
chr2:99224998_rs17034241	TCONS_00017852_UNC50	-10.7457	-10.7475	9.09963e-17	8.58639e-12	9.09963e-17	0.001	0.0114827
chr2:99224998_rs17034241	TCONS_00017851_UNC50	10.7457	10.7475	9.09963e-17	8.58639e-12	9.09963e-17	0.001	0.0114827
chr3:188066953_rs6787621	TCONS_00023113_LPP	-17.516	-10.5841	1.81941e-16	3.26492e-11	1.81941e-16	0.001	0.0114827
chr7:92977414_rs17711548	TCONS_00029945_SAMD9L	-14.2051	-10.2523	7.47855e-16	1.66072e-11	7.47855e-16	0.001	0.0114827
chr14:74030518_rs2336136	TCONS_00009903_HEATR4	-18.7864	-10.2409	7.85194e-16	1.18534e-11	7.85194e-16	0.001	0.0114827
chr17:35897332_rs4545872	TCONS_00014042_SYNRG	22.4269	10.1881	9.83997e-16	6.68172e-11	9.83997e-16	0.001	0.0114827
chr1:236711618_rs1041939	TCONS_00001816_LGALS8	21.5985	10.0977	1.44961e-15	3.35015e-11	1.44961e-15	0.001	0.0114827
chr1:236711618_rs1041939	TCONS_00001817_LGALS8	-21.5985	-10.0977	1.44961e-15	3.35015e-11	1.44961e-15	0.001	0.0114827
chr10:43661836_rs2435337	TCONS_00003687_CSGALNACT2	6.67178	10.0249	1.98036e-15	4.38998e-11	1.98036e-15	0.001	0.0114827
chr10:43661836_rs2435337	TCONS_00003688_CSGALNACT2	-6.67178	-10.0249	1.98036e-15	4.38998e-11	1.98036e-15	0.001	0.0114827
chr7:38203783_rs60458730	TCONS_00028815_STARD3NL	8.74777	9.9724	2.48156e-15	4.83437e-11	2.48156e-15	0.001	0.0114827
chr1:158324425_rs1065457	TCONS_00001197_CD1E	-3.71385	-9.96261	2.58822e-15	5.88622e-11	2.58822e-15	0.001	0.0114827
chr1:89475135_rs10493821	TCONS_00002496_GBP3	-18.8657	-9.94323	2.81298e-15	6.35938e-11	2.81298e-15	0.001	0.0114827
chr1:89475135_rs10493821	TCONS_00002502_GBP3	18.8657	9.94323	2.81298e-15	6.35938e-11	2.81298e-15	0.001	0.0114827
chr10:127738918_rs1710278	TCONS_00004725_ADAM12	-10.6044	-9.91357	3.19542e-15	6.74748e-11	3.19542e-15	0.001	0.0114827
chr11:62623019_rs2071034	TCONS_00006286_SNHG1	-8.91202	-9.87746	3.73226e-15	2.58654e-11	3.73226e-15	0.001	0.0114827
chr11:62623019_rs2071034	TCONS_00006287_SNHG1	8.91202	9.87746	3.73226e-15	2.58654e-11	3.73226e-15	0.001	0.0114827
chr20:25314439_rs6050541	TCONS_00020611_ABHD12	4.81625	9.86758	3.89437e-15	4.7086e-11	3.89437e-15	0.001	0.0114827
chr20:25314439_rs6050541	TCONS_00020617_ABHD12	-4.81625	-9.86758	3.89437e-15	4.7086e-11	3.89437e-15	0.001	0.0114827
chr1:151746524_rs1623480	TCONS_00002755_TDRKH	3.02353	9.85508	4.10965e-15	8.82595e-11	4.10965e-15	0.001	0.0114827
chr10:31282422_rs2887738	TCONS_00004346_ZNF438	-8.58588	-9.77469	5.80969e-15	1.18013e-10	5.80969e-15	0.001	0.0114827
chr4:76832856_rs2135232	TCONS_00024847_NAAA	7.73699	9.76764	5.98872e-15	6.04862e-11	5.98872e-15	0.001	0.0114827
chr20:43516156_rs2239535	TCONS_00020062_YWHAB	-2.52484	-9.76082	6.16742e-15	7.24231e-11	6.16742e-15	0.001	0.0114827
chr20:43516156_rs2239535	TCONS_00020063_YWHAB	2.52484	9.76082	6.16742e-15	7.24231e-11	6.16742e-15	0.001	0.0114827
chr12:109014241_rs59367899	TCONS_00008133_CORO1C	27.9312	9.71056	7.65976e-15	9.89401e-11	7.65976e-15	0.001	0.0114827
chr2:97000396_rs772173	TCONS_00017830_ITPRIPL1	11.1349	9.66318	9.39702e-15	3.55498e-10	9.39702e-15	0.001	0.0114827
chr11:66206169_rs11110	TCONS_00006355_MRPL11	10.6772	9.66229	9.43327e-15	6.25126e-11	9.43327e-15	0.001	0.0114827
chr11:66206169_rs11110	TCONS_00006354_MRPL11	-10.6772	-9.66229	9.43327e-15	6.25126e-11	9.43327e-15	0.001	0.0114827
chr12:104348430_rs2576975	TCONS_00042125_add_C12orf73	8.94582	9.64147	1.03203e-14	1.30635e-10	1.03203e-14	0.001	0.0114827
chr3:140953898_rs2292400	TCONS_00022846_ACPL2	-23.4055	-9.60057	1.23139e-14	1.16595e-09	1.23139e-14	0.001	0.0114827
chr3:140953898_rs2292400	TCONS_00022845_ACPL2	23.4055	9.60057	1.23139e-14	1.16595e-09	1.23139e-14	0.001	0.0114827
chr6:32573471_rs9270965	TCONS_00027994_HLA-DRB5	10.9951	9.58877	1.29582e-14	5.39201e-11	1.29582e-14	0.001	0.0114827
chr17:25962423_rs8079018	TCONS_00012909_LGALS9	-9.5711	-9.58264	1.33059e-14	6.53407e-10	1.33059e-14	0.001	0.0114827
chr17:25962423_rs8079018	TCONS_00012910_LGALS9	9.5711	9.58264	1.33059e-14	6.53407e-10	1.33059e-14	0.001	0.0114827
chr3:138076975_rs4678411	TCONS_00022841_MRAS	-10.2795	-9.53304	1.64871e-14	1.4245e-09	1.64871e-14	0.001	0.0114827
chr7:2278183_rs34418140	TCONS_00029578_FTSJ2	-7.4883	-9.49242	1.96534e-14	3.39323e-10	1.96534e-14	0.001	0.0114827
chr14:74030518_rs2336136	TCONS_00009421_ACOT2	-11.5	-9.43816	2.48538e-14	2.93316e-10	2.48538e-14	0.001	0.0114827
chr14:74030518_rs2336136	TCONS_00009422_ACOT2	11.5	9.43816	2.48538e-14	2.93316e-10	2.48538e-14	0.001	0.0114827
chr2:191520845_rs2293765	TCONS_00018278_NAB1	11.4967	9.42657	2.61331e-14	6.09473e-10	2.61331e-14	0.001	0.0114827
chr22:29717326_rs2519486	TCONS_00021792_AP1B1	6.56038	9.39557	2.98876e-14	4.73455e-10	2.98876e-14	0.001	0.0114827
chr22:29717326_rs2519486	TCONS_00021790_AP1B1	-6.56038	-9.39557	2.98876e-14	4.73455e-10	2.98876e-14	0.001	0.0114827
chr1:207943158_rs2724360	TCONS_00001664_CD46	-18.6742	-9.37454	3.27379e-14	6.03415e-10	3.27379e-14	0.001	0.0114827
chr20:34271574_rs11699793	TCONS_00020673_CPNE1	12.4373	9.37199	3.31003e-14	3.64173e-10	3.31003e-14	0.001	0.0114827
chr9:134452370_rs6879	TCONS_00032687_RAPGEF1	14.786	9.343	3.75308e-14	2.31253e-09	3.75308e-14	0.001	0.0114827
chr19:9531425_rs28711703	TCONS_00016514_ZNF266	-9.6864	-9.30373	4.44954e-14	4.73116e-10	4.44954e-14	0.001	0.0114827
chr13:114519894_rs12860172	TCONS_00045922_add_GAS6-AS1	-8.68315	-9.28507	4.82451e-14	4.25668e-09	4.82451e-14	0.001	0.0114827
chr16:25157759_rs277912	TCONS_00011437_LCMT1	-8.1452	-9.25403	5.51971e-14	1.3341e-08	5.51971e-14	0.001	0.0114827
chr2:53921270_rs3731970	TCONS_00017650_ERLEC1	5.01108	9.24648	5.70348e-14	1.19139e-09	5.70348e-14	0.001	0.0114827
chr2:53921270_rs3731970	TCONS_00017649_ERLEC1	-5.01108	-9.24648	5.70348e-14	1.19139e-09	5.70348e-14	0.001	0.0114827
chr3:196014366_rs6809764	TCONS_00024027_PCYT1A	5.15091	9.22247	6.32959e-14	3.67651e-09	6.32959e-14	0.001	0.0114827
chr3:196014366_rs6809764	TCONS_00024026_PCYT1A	-5.15091	-9.22247	6.32959e-14	3.67651e-09	6.32959e-14	0.001	0.0114827
chr11:66216815_rs1700184	TCONS_00005348_DPP3	13.6731	9.18832	7.34046e-14	3.63473e-10	7.34046e-14	0.001	0.0114827
chr7:38209015_rs12670582	TCONS_00028813_STARD3NL	-10.7255	-9.15794	8.37528e-14	1.30576e-09	8.37528e-14	0.001	0.0114827
chr4:169314327_rs4692656	TCONS_00025157_DDX60L	7.83308	8.97238	1.87571e-13	1.32706e-09	1.87571e-13	0.001	0.0114827
chr8:144643603_rs2290414	TCONS_00030793_GSDMD	8.14387	8.97047	1.89128e-13	3.53755e-09	1.89128e-13	0.001	0.0114827
chr14:100810717_rs12896648	TCONS_00010031_WARS	-8.43167	-8.95571	2.0167e-13	2.1379e-09	2.0167e-13	0.001	0.0114827
chr17:75183461_rs73378313	TCONS_00013493_SEC14L1	-24.814	-8.94201	2.14048e-13	9.38738e-09	2.14048e-13	0.001	0.0114827
chr3:48508585_rs11797	TCONS_00022432_ATRIP	-5.88266	-8.93166	2.23905e-13	9.67279e-09	2.23905e-13	0.001	0.0114827
chr17:16351816_rs11871963	TCONS_00012858_C17orf76-AS1	-11.8141	-8.89959	2.57422e-13	1.11027e-08	2.57422e-13	0.001	0.0114827
chr4:185655171_rs902174	TCONS_00025229_MLF1IP	34.7958	8.89511	2.62491e-13	1.77414e-09	2.62491e-13	0.001	0.0114827
chr4:185655171_rs902174	TCONS_00025230_MLF1IP	-34.7958	-8.89511	2.62491e-13	1.77414e-09	2.62491e-13	0.001	0.0114827
chr17:75183461_rs73378313	TCONS_00013480_SEC14L1	24.6587	8.87392	2.87845e-13	1.20915e-08	2.87845e-13	0.001	0.0114827
chr17:36017679_rs4497744	TCONS_00014041_SYNRG	-16.1793	-8.8364	3.38895e-13	1.39833e-08	3.38895e-13	0.001	0.0114827
chr12:9869271_rs2268146	TCONS_00007665_CLECL1	7.05033	8.82069	3.62873e-13	3.54294e-09	3.62873e-13	0.001	0.0114827
chr17:16351816_rs11871963	TCONS_00012856_C17orf76-AS1	10.6736	8.81466	3.72513e-13	1.52799e-08	3.72513e-13	0.001	0.0114827
chr3:16307935_rs2672562	TCONS_00023222_DPH3	-7.45605	-8.81309	3.75078e-13	1.48864e-08	3.75078e-13	0.001	0.0114827
chr3:16307935_rs2672562	TCONS_00023221_DPH3	7.45605	8.81309	3.75078e-13	1.48864e-08	3.75078e-13	0.001	0.0114827
chr9:114432002_rs116908136	TCONS_00031853_DNAJC25-GNG10	-4.56624	-8.77667	4.39502e-13	2.34135e-08	4.39502e-13	0.001	0.0114827
chr9:114432002_rs116908136	TCONS_00031854_DNAJC25-GNG10	4.56624	8.77667	4.39502e-13	2.34135e-08	4.39502e-13	0.001	0.0114827
chr18:61622086_rs8090046	TCONS_00080276_add_HMSD	-22.3501	-8.74257	5.09855e-13	1.47914e-08	5.09855e-13	0.001	0.0114827
chr10:76970613_rs11543	TCONS_00003881_VDAC2	2.13595	8.69067	6.39146e-13	9.15431e-09	6.39146e-13	0.001	0.0114827
chr10:76970613_rs11543	TCONS_00003878_VDAC2	-2.13595	-8.69067	6.39146e-13	9.15431e-09	6.39146e-13	0.001	0.0114827
chr1:79094081_rs1333973	TCONS_00000601_IFI44L	-10.4784	-8.67539	6.83139e-13	1.06256e-08	6.83139e-13	0.001	0.0114827
chr15:22922576_rs7171787	TCONS_00010159_CYFIP1	5.93836	8.67059	6.97542e-13	7.27986e-08	6.97542e-13	0.001	0.0114827
chr3:138061398_rs6782449	TCONS_00022842_MRAS	8.68195	8.6481	7.69356e-13	2.00564e-08	7.69356e-13	0.001	0.0114827
chr20:391025_rs6139109	TCONS_00019788_RBCK1	3.26256	8.63737	8.06167e-13	3.07532e-09	8.06167e-13	0.001	0.0114827
chr1:28209362_rs3766399	TCONS_00000291_THEMIS2	2.98585	8.59585	9.65976e-13	1.48829e-08	9.65976e-13	0.001	0.0114827
chr1:28209362_rs3766399	TCONS_00000290_THEMIS2	-2.98585	-8.59585	9.65976e-13	1.48829e-08	9.65976e-13	0.001	0.0114827
chr16:1292941_rs62012908	TCONS_00011182_TPSAB1	-13.8503	-8.5942	9.72938e-13	1.39823e-07	9.72938e-13	0.001	0.0114827
chr16:1292941_rs62012908	TCONS_00011180_TPSAB1	13.8503	8.5942	9.72938e-13	1.39823e-07	9.72938e-13	0.001	0.0114827
chr5:340047_rs2672749	TCONS_00025293_AHRR	6.0182	8.54958	1.18174e-12	3.49443e-08	1.18174e-12	0.001	0.0114827
chr12:123171089_rs635400	TCONS_00008281_HCAR1	-28.1249	-8.53713	1.24759e-12	1.09418e-08	1.24759e-12	0.001	0.0114827
chr22:50945799_rs41281543	TCONS_00022031_LMF2	-8.472	-8.52632	1.30778e-12	1.56138e-08	1.30778e-12	0.001	0.0114827
chr22:50945799_rs41281543	TCONS_00022032_LMF2	8.472	8.52632	1.30778e-12	1.56138e-08	1.30778e-12	0.001	0.0114827
chr10:127738918_rs1710278	TCONS_00004722_ADAM12	8.93002	8.50646	1.426e-12	2.01541e-08	1.426e-12	0.001	0.0114827
chr12:48296486_rs4760658	TCONS_00007775_VDR	6.86775	8.49117	1.52421e-12	1.31997e-08	1.52421e-12	0.001	0.0114827
chr12:48296486_rs4760658	TCONS_00007776_VDR	-6.86775	-8.49117	1.52421e-12	1.31997e-08	1.52421e-12	0.001	0.0114827
chr6:32626696_rs34865969	TCONS_00028019_HLA-DQB2	-66.1129	-8.45373	1.79435e-12	5.29746e-09	1.79435e-12	0.001	0.0114827
chr15:75130093_rs12898397	TCONS_00010984_ULK3	16.45	8.44271	1.88264e-12	1.91568e-07	1.88264e-12	0.001	0.0114827
chr11:833138_rs74194353	TCONS_00004796_CD151	4.9289	8.43295	1.96438e-12	8.1158e-09	1.96438e-12	0.001	0.0114827
chr11:833138_rs74194353	TCONS_00004797_CD151	-4.9289	-8.43295	1.96438e-12	8.1158e-09	1.96438e-12	0.001	0.0114827
chr15:75130093_rs12898397	TCONS_00010983_ULK3	-16.8972	-8.43236	1.96948e-12	1.95517e-07	1.96948e-12	0.001	0.0114827
chr6:46657057_rs3799277	TCONS_00028236_PLA2G7	4.52255	8.4208	2.0712e-12	5.98159e-09	2.0712e-12	0.001	0.0114827
chr10:129881701_rs7085589	TCONS_00004156_PTPRE	2.73402	8.40912	2.17938e-12	2.93276e-08	2.17938e-12	0.001	0.0114827
chr3:49035885_rs6414613	TCONS_00022444_ARIH2	-5.0953	-8.34391	2.89561e-12	5.39477e-08	2.89561e-12	0.001	0.0114827
chr5:131723289_rs2073644	TCONS_00026326_P4HA2	-14.1504	-8.33805	2.9705e-12	8.15481e-08	2.9705e-12	0.001	0.0114827
chr11:59930888_rs620368	TCONS_00006176_MS4A6A	-10.395	-8.3203	3.20943e-12	1.29701e-08	3.20943e-12	0.001	0.0114827
chr20:257733_rs2277781	TCONS_00020243_C20orf96	-12.5566	-8.32007	3.21262e-12	1.03428e-08	3.21262e-12	0.001	0.0114827
chr20:257733_rs2277781	TCONS_00020244_C20orf96	12.5566	8.32007	3.21262e-12	1.03428e-08	3.21262e-12	0.001	0.0114827
chr15:89436485_rs8024934	TCONS_00011070_HAPLN3	7.00701	8.31118	3.33955e-12	3.17651e-07	3.33955e-12	0.001	0.0114827
chr6:46662577_rs2216464	TCONS_00028235_PLA2G7	2.87683	8.30006	3.50538e-12	9.66753e-09	3.50538e-12	0.001	0.0114827
chr19:54793721_rs61703366	TCONS_00017371_LILRA6	10.8071	8.275	3.90974e-12	2.96346e-08	3.90974e-12	0.001	0.0114827
chr12:10276136_rs10845050	TCONS_00007679_CLEC7A	-7.95648	-8.25404	4.28372e-12	3.53622e-08	4.28372e-12	0.001	0.0114827
chr5:96233450_rs2113189	TCONS_00025657_ERAP2	-8.42467	-8.19306	5.58738e-12	1.36223e-07	5.58738e-12	0.001	0.0114827
chr14:74310394_rs2041183	TCONS_00009427_ZNF410	9.49111	8.18605	5.7606e-12	4.22137e-08	5.7606e-12	0.001	0.0114827
chr14:74310394_rs2041183	TCONS_00009426_ZNF410	-9.49111	-8.18605	5.7606e-12	4.22137e-08	5.7606e-12	0.001	0.0114827
chr6:86350394_rs4348284	TCONS_00028313_SNHG5	14.5285	8.15099	6.71118e-12	1.79094e-08	6.71118e-12	0.001	0.0114827
chr7:43804695_rs1181574	TCONS_00029724_COA1	-12.03	-8.12113	7.64367e-12	9.73595e-08	7.64367e-12	0.001	0.0114827
chr1:15480493_rs7530300	TCONS_00000141_TMEM51	-6.96931	-8.10752	8.11026e-12	1.16176e-07	8.11026e-12	0.001	0.0114827
chr1:225969205_rs12033739	TCONS_00001732_SRP9	-2.80394	-8.08376	8.99468e-12	1.27564e-07	8.99468e-12	0.001	0.0114827
chr1:225969205_rs12033739	TCONS_00001733_SRP9	2.80394	8.08376	8.99468e-12	1.27564e-07	8.99468e-12	0.001	0.0114827
chr17:16355494_rs118184588	TCONS_00012853_TRPV2	-9.17194	-8.083	9.02432e-12	2.3927e-07	9.02432e-12	0.001	0.0114827
chr17:78181132_rs6565646	TCONS_00014600_SGSH	-9.42211	-8.0119	1.22991e-11	3.0904e-07	1.22991e-11	0.001	0.0114827
chr17:78181132_rs6565646	TCONS_00014597_SGSH	9.42211	8.0119	1.22991e-11	3.0904e-07	1.22991e-11	0.001	0.0114827
chr1:150298750_rs698914	TCONS_00000908_MRPS21	-5.44063	-8.00815	1.25015e-11	1.71339e-07	1.25015e-11	0.001	0.0114827
chr1:150298750_rs698914	TCONS_00000907_MRPS21	5.44063	8.00815	1.25015e-11	1.71339e-07	1.25015e-11	0.001	0.0114827
chr1:158343145_rs858568	TCONS_00001180_CD1E	5.10053	7.96611	1.5012e-11	2.00453e-07	1.5012e-11	0.001	0.0114827
chr6:33075666_rs114778875	TCONS_00028074_HLA-DPA1	-34.3541	-7.93364	1.72907e-11	4.35946e-08	1.72907e-11	0.001	0.0114827
chr6:33075666_rs114778875	TCONS_00028070_HLA-DPA1	34.3541	7.93364	1.72907e-11	4.35946e-08	1.72907e-11	0.001	0.0114827
chr15:22922576_rs7171787	TCONS_00010160_CYFIP1	-6.05089	-7.92182	1.82033e-11	1.25579e-06	1.82033e-11	0.001	0.0114827
chr4:78101186_rs10022252	TCONS_00024306_CCNG2	4.28923	7.88862	2.10316e-11	1.17764e-07	2.10316e-11	0.001	0.0114827
chr4:78101186_rs10022252	TCONS_00024310_CCNG2	-4.28923	-7.88862	2.10316e-11	1.17764e-07	2.10316e-11	0.001	0.0114827
chr17:39942919_rs4796702	TCONS_00014087_JUP	13.4669	7.88775	2.11121e-11	4.36967e-07	2.11121e-11	0.001	0.0114827
chr11:35277088_rs10742338	TCONS_00004980_CD44	-2.68028	-7.8866	2.12176e-11	7.64242e-08	2.12176e-11	0.001	0.0114827
chr19:3545850_rs10424296	TCONS_00016412_MFSD12	5.89959	7.88192	2.16544e-11	1.47369e-07	2.16544e-11	0.001	0.0114827
chr4:169314327_rs4692656	TCONS_00025161_DDX60L	6.77092	7.82694	2.75034e-11	1.45193e-07	2.75034e-11	0.001	0.0114827
chr17:78075228_rs2304850	TCONS_00013525_GAA	-12.975	-7.81817	2.85719e-11	5.82562e-07	2.85719e-11	0.001	0.0114827
chr17:78075228_rs2304850	TCONS_00013526_GAA	12.975	7.81817	2.85719e-11	5.82562e-07	2.85719e-11	0.001	0.0114827
chr2:119989596_rs838096	TCONS_00018019_STEAP3	-12.2041	-7.80761	2.99145e-11	3.17492e-07	2.99145e-11	0.001	0.0114827
chr2:119989596_rs838096	TCONS_00018018_STEAP3	12.2041	7.80761	2.99145e-11	3.17492e-07	2.99145e-11	0.001	0.0114827
chr19:14877857_rs10418770	TCONS_00016657_EMR2	-25.1591	-7.78804	3.25717e-11	2.16077e-07	3.25717e-11	0.001	0.0114827
chr9:139358425_rs12551527	TCONS_00032757_SEC16A	19.8531	7.76978	3.52621e-11	1.56815e-06	3.52621e-11	0.001	0.0114827
chr19:54771451_rs587709	TCONS_00017362_LILRA6	-16.8585	-7.76217	3.64475e-11	2.40661e-07	3.64475e-11	0.001	0.0114827
chr1:197704717_rs17641524	TCONS_00003126_DENND1B	0.542758	7.73707	4.0647e-11	5.02223e-07	4.0647e-11	0.001	0.0114827
chr1:9319556_rs3765959	TCONS_00000072_H6PD	27.557	7.72951	4.20034e-11	5.15949e-07	4.20034e-11	0.001	0.0114827
chr14:24903245_rs7143804	TCONS_00009199_KHNYN	4.18801	7.72752	4.2368e-11	2.14095e-07	4.2368e-11	0.001	0.0114827
chr14:24903245_rs7143804	TCONS_00009197_KHNYN	-4.18801	-7.72752	4.2368e-11	2.14095e-07	4.2368e-11	0.001	0.0114827
chr2:218928710_rs3181210	TCONS_00019629_CXCR2P1	6.34348	7.71896	4.39747e-11	4.49249e-07	4.39747e-11	0.001	0.0114827
chr11:35277088_rs10742338	TCONS_00004979_CD44	3.37017	7.70546	4.66302e-11	1.5877e-07	4.66302e-11	0.001	0.0114827
chr7:48765738_rs13225169	TCONS_00158800_add_PKD1L1	-16.059	-7.6863	5.06757e-11	5.92538e-07	5.06757e-11	0.001	0.0114827
chr3:53204845_rs3773729	TCONS_00022557_PRKCD	-15.4609	-7.68337	5.13248e-11	6.13771e-07	5.13248e-11	0.001	0.0114827
chr2:175347650_rs12614738	TCONS_00019468_GPR155	8.64457	7.68245	5.15307e-11	5.19694e-07	5.15307e-11	0.001	0.0114827
chr13:113534382_rs1278766	TCONS_00008717_ATP11A	-8.19641	-7.66686	5.51389e-11	1.70272e-06	5.51389e-11	0.001	0.0114827
chr17:77077452_rs73398101	TCONS_00013521_ENGASE	-19.6431	-7.64156	6.15386e-11	1.20878e-06	6.15386e-11	0.001	0.0114827
chr17:77077452_rs73398101	TCONS_00013522_ENGASE	19.6431	7.64156	6.15386e-11	1.20878e-06	6.15386e-11	0.001	0.0114827
chr6:32587409_rs9271385	TCONS_00027996_HLA-DRB5	-4.96522	-7.6371	6.27414e-11	1.32944e-07	6.27414e-11	0.001	0.0114827
chr22:30182616_rs12628234	TCONS_00021405_UQCR10	3.68966	7.63678	6.2829e-11	5.96588e-07	6.2829e-11	0.001	0.0114827
chr22:30182616_rs12628234	TCONS_00021404_UQCR10	-3.68966	-7.63678	6.2829e-11	5.96588e-07	6.2829e-11	0.001	0.0114827
chr10:127738918_rs1710278	TCONS_00004723_ADAM12	8.15008	7.62165	6.70918e-11	7.35995e-07	6.70918e-11	0.001	0.0114827
chr12:123200527_rs118091133	TCONS_00008307_HCAR1	18.8683	7.60126	7.32994e-11	4.60441e-07	7.32994e-11	0.001	0.0114827
chr1:154259650_rs1760801	TCONS_00005071_add_HAX1	-7.62502	-7.53179	9.9068e-11	1.09915e-06	9.9068e-11	0.001	0.0114827
chr1:154259650_rs1760801	TCONS_00005070_add_HAX1	7.62502	7.53179	9.9068e-11	1.09915e-06	9.9068e-11	0.001	0.0114827
chr3:53270689_rs3821691	TCONS_00023567_TKT	-1.49523	-7.49788	1.14749e-10	1.31317e-06	1.14749e-10	0.001	0.0114827
chr3:53270689_rs3821691	TCONS_00023568_TKT	1.49523	7.49788	1.14749e-10	1.31317e-06	1.14749e-10	0.001	0.0114827
chr1:197342380_rs72740550	TCONS_00003112_DENND1B	-7.66782	-7.49538	1.15998e-10	1.2529e-06	1.15998e-10	0.001	0.0114827
chr6:31033863_rs115608555	TCONS_00027001_HLA-L	-29.0177	-7.48209	1.22871e-10	2.37923e-07	1.22871e-10	0.001	0.0114827
chr17:74555106_rs4647885	TCONS_00013461_SNHG16	-10.7105	-7.45558	1.37822e-10	2.56967e-06	1.37822e-10	0.001	0.0114827
chr17:74555106_rs4647885	TCONS_00013460_SNHG16	10.7105	7.45558	1.37822e-10	2.56967e-06	1.37822e-10	0.001	0.0114827
chr11:130023840_rs7950808	TCONS_00005754_APLP2	-4.51634	-7.44993	1.4123e-10	4.47898e-07	1.4123e-10	0.001	0.0114827
chr3:48385718_rs7640221	TCONS_00022423_ZNF589	3.75723	7.42841	1.55023e-10	1.52639e-06	1.55023e-10	0.001	0.0114827
chr16:4594671_rs1684600	TCONS_00012066_NMRAL1	-11.9445	-7.40626	1.70617e-10	5.63498e-06	1.70617e-10	0.001	0.0114827
chr16:4594671_rs1684600	TCONS_00012065_NMRAL1	11.9445	7.40626	1.70617e-10	5.63498e-06	1.70617e-10	0.001	0.0114827
chr5:180232480_rs58072284	TCONS_00026700_MGAT1	0.421658	7.40366	1.72545e-10	1.99029e-06	1.72545e-10	0.001	0.0114827
chr7:43804695_rs1181574	TCONS_00029725_COA1	10.7303	7.39347	1.80321e-10	1.94768e-06	1.80321e-10	0.001	0.0114827
chr3:41281388_rs2953	TCONS_00022354_CTNNB1	3.27006	7.38892	1.83906e-10	1.77043e-06	1.83906e-10	0.001	0.0114827
chr3:41281388_rs2953	TCONS_00022357_CTNNB1	-3.27006	-7.38892	1.83906e-10	1.77043e-06	1.83906e-10	0.001	0.0114827
chr6:36995222_rs2274587	TCONS_00027270_FGD2	-3.51024	-7.38371	1.88098e-10	3.40267e-07	1.88098e-10	0.001	0.0114827
chr12:58112189_rs799265	TCONS_00007182_OS9	-4.60927	-7.38341	1.8834e-10	1.12362e-06	1.8834e-10	0.001	0.0114827
chr17:7145981_rs222843	TCONS_00012736_ELP5	13.5088	7.38322	1.88495e-10	3.3964e-06	1.88495e-10	0.001	0.0114827
chr11:2316720_rs2651836	TCONS_00005880_C11orf21	-9.95318	-7.36187	2.0673e-10	6.45482e-07	2.0673e-10	0.001	0.0114827
chr10:85871218_rs4933965	TCONS_00003943_GHITM	3.00669	7.34104	2.26207e-10	2.39304e-06	2.26207e-10	0.001	0.0114827
chr10:85871218_rs4933965	TCONS_00003942_GHITM	-3.00669	-7.34104	2.26207e-10	2.39304e-06	2.26207e-10	0.001	0.0114827
chr2:71037580_rs78024150	TCONS_00019092_CLEC4F	-31.8114	-7.31724	2.50706e-10	2.34945e-06	2.50706e-10	0.001	0.0114827
chr10:46136306_rs4949013	TCONS_00003710_FAM21C	23.1186	7.29204	2.79531e-10	2.93968e-06	2.79531e-10	0.001	0.0114827
chr15:90406884_rs12594774	TCONS_00011089_C15orf38-AP3S2	2.97149	7.291	2.80789e-10	1.0287e-05	2.80789e-10	0.001	0.0114827
chr15:90406884_rs12594774	TCONS_00011090_C15orf38-AP3S2	-2.97149	-7.291	2.80789e-10	1.0287e-05	2.80789e-10	0.001	0.0114827
chr5:131578265_rs2136186	TCONS_00026327_P4HA2	9.67548	7.28886	2.83393e-10	2.86184e-06	2.83393e-10	0.001	0.0114827
chr5:430217_rs957791	TCONS_00025298_EXOC3	20.7344	7.27214	3.0461e-10	3.01528e-06	3.0461e-10	0.001	0.0114827
chr5:430217_rs957791	TCONS_00025294_EXOC3	-20.7344	-7.27214	3.0461e-10	3.01528e-06	3.0461e-10	0.001	0.0114827
chr1:85399781_rs12124212	TCONS_00002467_MCOLN2	6.8803	7.2695	3.08105e-10	2.92397e-06	3.08105e-10	0.001	0.0114827
chr3:48297611_rs11130162	TCONS_00022426_ZNF589	4.2451	7.26364	3.15994e-10	2.94759e-06	3.15994e-10	0.001	0.0114827
chr3:48845481_rs9882584	TCONS_00022450_WDR6	-4.27778	-7.25931	3.21954e-10	2.9951e-06	3.21954e-10	0.001	0.0114827
chr6:31555392_rs2256974	TCONS_00027046_LST1	4.82621	7.24908	3.36484e-10	5.75338e-07	3.36484e-10	0.001	0.0114827
chr1:114449662_rs3761936	TCONS_00000764_DCLRE1B	-9.35401	-7.23019	3.6506e-10	3.42182e-06	3.6506e-10	0.001	0.0114827
chr1:114449662_rs3761936	TCONS_00000765_DCLRE1B	9.35401	7.23019	3.6506e-10	3.42182e-06	3.6506e-10	0.001	0.0114827
chr19:49459104_rs1805419	TCONS_00015899_BAX	2.84549	7.21917	3.82825e-10	2.34712e-06	3.82825e-10	0.001	0.0114827
chr19:49459104_rs1805419	TCONS_00015902_BAX	-2.84549	-7.21917	3.82825e-10	2.34712e-06	3.82825e-10	0.001	0.0114827
chr4:1327952_rs11247993	TCONS_00128827_add_UVSSA	-1.60762	-7.21344	3.92409e-10	1.6872e-06	3.92409e-10	0.001	0.0114827
chr13:113534382_rs1278766	TCONS_00008712_ATP11A	7.80701	7.19928	4.17111e-10	1.06232e-05	4.17111e-10	0.001	0.0114827
chr8:130899961_rs298617	TCONS_00031292_FAM49B	-3.99509	-7.19191	4.30573e-10	2.87817e-06	4.30573e-10	0.001	0.0114827
chr22:50873546_rs2273254	TCONS_00022020_PLXNB2	11.9661	7.18565	4.42353e-10	3.11547e-06	4.42353e-10	0.001	0.0114827
chr1:151746524_rs1623480	TCONS_00002749_TDRKH	-4.224	-7.18513	4.43336e-10	4.07851e-06	4.43336e-10	0.001	0.0114827
chr7:150025734_rs55881542	TCONS_00029435_LRRC61	-7.70521	-7.1851	4.43395e-10	4.6479e-06	4.43395e-10	0.001	0.0114827
chr3:113682744_rs6809347	TCONS_00022701_QTRTD1	-6.76514	-7.17704	4.59074e-10	4.16423e-06	4.59074e-10	0.001	0.0114827
chr7:92769662_rs6974267	TCONS_00029948_SAMD9L	11.1067	7.14926	5.17415e-10	5.3655e-06	5.17415e-10	0.001	0.0114827
chr3:37121092_rs6806487	TCONS_00023279_LRRFIP2	-6.44145	-7.14391	5.2949e-10	4.73462e-06	5.2949e-10	0.001	0.0114827
chr1:111642031_rs11102212	TCONS_00002592_DRAM2	-9.77092	-7.12973	5.62806e-10	5.012e-06	5.62806e-10	0.001	0.0114827
chr2:101911385_rs3828194	TCONS_00019261_RNF149	-2.33881	-7.12641	5.70922e-10	4.89235e-06	5.70922e-10	0.001	0.0114827
chr16:21822469_rs4783352	TCONS_00012164_RRN3P1	-11.5086	-7.10487	6.26367e-10	1.58601e-05	6.26367e-10	0.001	0.0114827
chr3:113809350_rs7620955	TCONS_00022702_QTRTD1	-7.01397	-7.09615	6.50317e-10	5.63993e-06	6.50317e-10	0.001	0.0114827
chr11:71207347_rs7130479	TCONS_00005471_NADSYN1	6.41991	7.08821	6.7291e-10	1.99357e-06	6.7291e-10	0.001	0.0114827
chr11:71207347_rs7130479	TCONS_00005470_NADSYN1	-6.41991	-7.08821	6.7291e-10	1.99357e-06	6.7291e-10	0.001	0.0114827
chr8:144643169_rs1545536	TCONS_00030787_GSDMD	-13.1078	-7.08529	6.81403e-10	4.23074e-06	6.81403e-10	0.001	0.0114827
chr2:161407503_rs56132009	TCONS_00019416_RBMS1	-11.216	-7.08224	6.90401e-10	5.80114e-06	6.90401e-10	0.001	0.0114827
chr9:134450735_rs66509550	TCONS_00032686_RAPGEF1	-9.43912	-7.07858	7.01352e-10	2.25588e-05	7.01352e-10	0.001	0.0114827
chr6:160133633_rs76993980	TCONS_00028546_SOD2	-6.23512	-7.0344	8.4799e-10	1.37578e-06	8.4799e-10	0.001	0.0114827
chr6:160133633_rs76993980	TCONS_00028547_SOD2	6.23512	7.0344	8.4799e-10	1.37578e-06	8.4799e-10	0.001	0.0114827
chr17:38808941_rs1029792	TCONS_00014070_SMARCE1	2.87087	7.01938	9.04514e-10	1.29514e-05	9.04514e-10	0.001	0.0114827
chr17:38808941_rs1029792	TCONS_00014072_SMARCE1	-2.87087	-7.01938	9.04514e-10	1.29514e-05	9.04514e-10	0.001	0.0114827
chr10:46136306_rs4949013	TCONS_00003708_FAM21C	-15.455	-7.00081	9.79575e-10	8.97616e-06	9.79575e-10	0.001	0.0114827
chr6:28207363_rs1150709	TCONS_00026904_ZSCAN26	-13.4591	-6.98637	1.04219e-09	1.67829e-06	1.04219e-09	0.001	0.0114827
chr6:28207363_rs1150709	TCONS_00026905_ZSCAN26	13.4591	6.98637	1.04219e-09	1.67829e-06	1.04219e-09	0.001	0.0114827
chr18:67601636_rs1823778	TCONS_00015076_CD226	6.49827	6.97232	1.10696e-09	2.03854e-05	1.10696e-09	0.001	0.0114827
chr20:3979180_rs6052226	TCONS_00019849_PANK2	-2.3595	-6.94992	1.21854e-09	3.24201e-06	1.21854e-09	0.001	0.0114827
chr22:50639636_rs6010201	TCONS_00021668_SELO	6.00021	6.93966	1.27331e-09	8.04473e-06	1.27331e-09	0.001	0.0114827
chr11:20379963_rs11025525	TCONS_00004928_HTATIP2	8.27589	6.93867	1.27877e-09	3.6287e-06	1.27877e-09	0.001	0.0114827
chr22:42905495_rs6002775	TCONS_00021978_RRP7B	-24.8356	-6.93233	1.31395e-09	8.26933e-06	1.31395e-09	0.001	0.0114827
chr3:52864860_rs2071040	TCONS_00023504_TMEM110-MUSTN1	-9.27275	-6.92136	1.37722e-09	1.10051e-05	1.37722e-09	0.001	0.0114827
chr3:52864860_rs2071040	TCONS_00023563_TMEM110-MUSTN1	9.27275	6.92136	1.37722e-09	1.10051e-05	1.37722e-09	0.001	0.0114827
chr12:9866349_rs7977720	TCONS_00007664_CLECL1	4.05006	6.91921	1.38992e-09	7.7798e-06	1.38992e-09	0.001	0.0114827
chr2:223777527_rs11674416	TCONS_00018587_ACSL3	6.74775	6.91634	1.40712e-09	1.12368e-05	1.40712e-09	0.001	0.0114827
chr19:54770827_rs4090914	TCONS_00017364_LILRA6	17.7723	6.91004	1.44561e-09	8.10003e-06	1.44561e-09	0.001	0.0114827
chr22:36626724_rs6000209	TCONS_00021865_APOL4	-19.967	-6.90937	1.44978e-09	9.07139e-06	1.44978e-09	0.001	0.0114827
chr1:9319556_rs3765959	TCONS_00000071_H6PD	-16.3762	-6.90116	1.50167e-09	1.23162e-05	1.50167e-09	0.001	0.0114827
chr19:54748760_rs635711	TCONS_00017325_LILRB3	3.93958	6.85434	1.83477e-09	1.01848e-05	1.83477e-09	0.001	0.0114827
chr6:3738062_rs2296260	TCONS_00027750_PXDC1	4.693	6.82105	2.11525e-09	3.29364e-06	2.11525e-09	0.001	0.0114827
chr6:3738062_rs2296260	TCONS_00027749_PXDC1	-4.693	-6.82105	2.11525e-09	3.29364e-06	2.11525e-09	0.001	0.0114827
chr1:112033519_rs2252197	TCONS_00002605_ADORA3	5.43452	6.81006	2.21699e-09	1.76996e-05	2.21699e-09	0.001	0.0114827
chr1:8022197_rs3766606	TCONS_00000063_PARK7	-6.66866	-6.80974	2.21996e-09	1.76996e-05	2.21996e-09	0.001	0.0114827
chr2:97000396_rs772173	TCONS_00017832_ITPRIPL1	-9.82442	-6.80483	2.26704e-09	1.69652e-05	2.26704e-09	0.001	0.0114827
chr11:882406_rs61869681	TCONS_00005859_CHID1	8.14832	6.77842	2.53753e-09	6.82271e-06	2.53753e-09	0.001	0.0114827
chr10:127738918_rs1710278	TCONS_00004724_ADAM12	-6.47566	-6.76875	2.64451e-09	2.26773e-05	2.64451e-09	0.001	0.0114827
chr2:202006860_rs56160734	TCONS_00018379_CFLAR	-2.89973	-6.76584	2.67745e-09	1.98128e-05	2.67745e-09	0.001	0.0114827
chr10:129845903_rs7912703	TCONS_00004152_PTPRE	-3.98209	-6.75172	2.84367e-09	2.42683e-05	2.84367e-09	0.001	0.0114827
chr16:4735631_rs1684588	TCONS_00011305_MGRN1	8.26045	6.74039	2.98442e-09	5.85579e-05	2.98442e-09	0.001	0.0114827
chr16:4735631_rs1684588	TCONS_00011304_MGRN1	-8.26045	-6.74039	2.98442e-09	5.85579e-05	2.98442e-09	0.001	0.0114827
chr17:17127471_rs1736219	TCONS_00013844_COPS3	3.08037	6.73354	3.0728e-09	3.16017e-05	3.0728e-09	0.001	0.0114827
chr17:17127471_rs1736219	TCONS_00013843_COPS3	-3.08037	-6.73354	3.0728e-09	3.16017e-05	3.0728e-09	0.001	0.0114827
chr19:7792466_rs61217964	TCONS_00016494_CLEC4G	4.38011	6.73218	3.09067e-09	1.68507e-05	3.09067e-09	0.001	0.0114827
chr11:33723211_rs831617	TCONS_00006006_CD59	3.85344	6.72274	3.21756e-09	8.47993e-06	3.21756e-09	0.001	0.0114827
chr17:75395206_rs76135648	TCONS_00014545_MXRA7	-69.3893	-6.72168	3.23208e-09	3.20594e-05	3.23208e-09	0.001	0.0114827
chr12:4714557_rs758532	TCONS_00006749_DYRK4	-13.9319	-6.72026	3.25165e-09	1.75719e-05	3.25165e-09	0.001	0.0114827
chr12:4714557_rs758532	TCONS_00006750_DYRK4	13.9319	6.72026	3.25165e-09	1.75719e-05	3.25165e-09	0.001	0.0114827
chr22:50873546_rs2273254	TCONS_00022021_PLXNB2	-5.63581	-6.71905	3.2685e-09	1.94005e-05	3.2685e-09	0.001	0.0114827
chr3:160939141_rs28384382	TCONS_00022968_NMD3	-6.9311	-6.69355	3.64342e-09	2.50583e-05	3.64342e-09	0.001	0.0114827
chr3:160939141_rs28384382	TCONS_00022971_NMD3	6.9311	6.69355	3.64342e-09	2.50583e-05	3.64342e-09	0.001	0.0114827
chr11:68025559_rs2512617	TCONS_00006382_C11orf24	1.40393	6.69132	3.67811e-09	9.51672e-06	3.67811e-09	0.001	0.0114827
chr11:68025559_rs2512617	TCONS_00006381_C11orf24	-1.40393	-6.69132	3.67811e-09	9.51672e-06	3.67811e-09	0.001	0.0114827
chr9:150524_rs62530924	TCONS_00032098_CBWD1	11.9977	6.67143	4.00303e-09	0.000100354	4.00303e-09	0.001	0.0114827
chr1:47158266_rs61782563	TCONS_00002350_EFCAB14	6.73892	6.64409	4.49649e-09	3.26143e-05	4.49649e-09	0.001	0.0114827
chr7:2278183_rs34418140	TCONS_00029577_FTSJ2	9.862	6.63891	4.59645e-09	3.99865e-05	4.59645e-09	0.001	0.0114827
chr9:130220698_rs7874743	TCONS_00031934_ZNF79	15.1435	6.6385	4.60457e-09	0.000112136	4.60457e-09	0.001	0.0114827
chr9:130220698_rs7874743	TCONS_00031935_ZNF79	-15.1435	-6.6385	4.60457e-09	0.000112136	4.60457e-09	0.001	0.0114827
chr22:24185384_rs7286912	TCONS_00021738_CHCHD10	-11.2093	-6.61828	5.01746e-09	2.72473e-05	5.01746e-09	0.001	0.0114827
chr22:24185384_rs7286912	TCONS_00021737_CHCHD10	11.2093	6.61828	5.01746e-09	2.72473e-05	5.01746e-09	0.001	0.0114827
chr11:33724780_rs704697	TCONS_00006000_CD59	-3.54941	-6.61776	5.02847e-09	1.21119e-05	5.02847e-09	0.001	0.0114827
chr22:24250795_rs2330634	TCONS_00021335_GSTT2	15.2281	6.6161	5.06416e-09	2.73907e-05	5.06416e-09	0.001	0.0114827
chr22:24250795_rs2330634	TCONS_00021740_GSTT2	-15.2281	-6.6161	5.06416e-09	2.73907e-05	5.06416e-09	0.001	0.0114827
chr1:9319556_rs3765959	TCONS_00000069_H6PD	-20.7613	-6.60529	5.30184e-09	3.72948e-05	5.30184e-09	0.001	0.0114827
chr15:40598294_rs3784399	TCONS_00010722_PLCB2	4.7788	6.57378	6.06012e-09	9.00218e-05	6.06012e-09	0.001	0.0114827
chr20:44388247_rs2090363	TCONS_00020093_DNTTIP1	6.49722	6.56731	6.22862e-09	1.59228e-05	6.22862e-09	0.001	0.0114827
chr20:44388247_rs2090363	TCONS_00020092_DNTTIP1	-6.49722	-6.56731	6.22862e-09	1.59228e-05	6.22862e-09	0.001	0.0114827
chr3:98330640_rs4857409	TCONS_00124617_add_ST3GAL6-AS1	-14.973	-6.55853	6.46476e-09	4.15686e-05	6.46476e-09	0.001	0.0114827
chr10:104201598_rs11191288	TCONS_00004643_CUEDC2	13.8102	6.55187	6.64993e-09	5.48247e-05	6.64993e-09	0.001	0.0114827
chr10:104201598_rs11191288	TCONS_00004642_CUEDC2	-13.8102	-6.55187	6.64993e-09	5.48247e-05	6.64993e-09	0.001	0.0114827
chr7:30588091_rs38468	TCONS_00158245_add_LOC401320	4.44461	6.52714	7.384e-09	6.10129e-05	7.384e-09	0.001	0.0114827
chr11:20379963_rs11025525	TCONS_00004927_HTATIP2	-8.10223	-6.52625	7.41215e-09	1.71584e-05	7.41215e-09	0.001	0.0114827
chr4:17630242_rs4698635	TCONS_00024178_MED28	-5.03623	-6.52452	7.46653e-09	2.62777e-05	7.46653e-09	0.001	0.0114827
chr4:17630242_rs4698635	TCONS_00024179_MED28	5.03623	6.52452	7.46653e-09	2.62777e-05	7.46653e-09	0.001	0.0114827
chr22:36597616_rs132727	TCONS_00021868_APOL4	15.1625	6.52374	7.49121e-09	3.76582e-05	7.49121e-09	0.001	0.0114827
chr3:49016056_rs7621015	TCONS_00022447_ARIH2	4.7801	6.51883	7.64855e-09	4.63341e-05	7.64855e-09	0.001	0.0114827
chr1:112042149_rs3393	TCONS_00002607_ADORA3	-5.49658	-6.51532	7.76298e-09	5.22876e-05	7.76298e-09	0.001	0.0114827
chr7:75636240_rs6978677	TCONS_00029880_STYXL1	-2.52407	-6.5071	8.03757e-09	6.51376e-05	8.03757e-09	0.001	0.0114827
chr11:2316720_rs2651836	TCONS_00005878_C11orf21	8.02216	6.50306	8.17608e-09	1.87702e-05	8.17608e-09	0.001	0.0114827
chr3:48519905_rs76134549	TCONS_00022440_ATRIP	7.57009	6.47328	9.27308e-09	5.47829e-05	9.27308e-09	0.001	0.0114827
chr3:44738629_rs4682750	TCONS_00022389_TCAIM	-4.88677	-6.46977	9.41155e-09	5.53445e-05	9.41155e-09	0.001	0.0114827
chr5:96235038_rs251339	TCONS_00025647_ERAP2	17.9309	6.46146	9.748e-09	4.47839e-05	9.748e-09	0.001	0.0114827
chr1:120143753_rs12057263	TCONS_00002632_ZNF697	28.2797	6.45843	9.87327e-09	6.48071e-05	9.87327e-09	0.001	0.0114827
chr1:120143753_rs12057263	TCONS_00002631_ZNF697	-28.2797	-6.45843	9.87327e-09	6.48071e-05	9.87327e-09	0.001	0.0114827
chr1:207798238_rs10863418	TCONS_00001661_CR1	-11.1522	-6.45654	9.95257e-09	6.50715e-05	9.95257e-09	0.001	0.0114827
chr19:3540769_rs150908739	TCONS_00016410_MFSD12	-3.10551	-6.45375	1.00704e-08	5.05713e-05	1.00704e-08	0.001	0.0114827
chr4:122764725_rs7686084	TCONS_00024475_EXOSC9	9.27113	6.42361	1.14363e-08	3.8648e-05	1.14363e-08	0.001	0.0114827
chr4:122764725_rs7686084	TCONS_00024474_EXOSC9	-9.27113	-6.42361	1.14363e-08	3.8648e-05	1.14363e-08	0.001	0.0114827
chr8:144660257_rs2015562	TCONS_00031342_NAPRT1	-9.10425	-6.40745	1.22426e-08	5.65966e-05	1.22426e-08	0.001	0.0114827
chr8:144660257_rs2015562	TCONS_00031341_NAPRT1	9.10425	6.40745	1.22426e-08	5.65966e-05	1.22426e-08	0.001	0.0114827
chr6:31472956_rs2507967	TCONS_00027033_MICB	7.31689	6.39597	1.28496e-08	1.83567e-05	1.28496e-08	0.001	0.0114827
chr2:223756961_rs17176871	TCONS_00018584_ACSL3	4.328	6.39101	1.31208e-08	8.60323e-05	1.31208e-08	0.001	0.0114827
chr12:57870648_rs512490	TCONS_00007986_ARHGAP9	-10.932	-6.38582	1.34107e-08	6.97872e-05	1.34107e-08	0.001	0.0114827
chr4:76847205_rs3733234	TCONS_00024833_NAAA	1.69958	6.35347	1.53668e-08	5.06831e-05	1.53668e-08	0.001	0.0114827
chr7:30583370_rs38460	TCONS_00158251_add_LOC401320	-3.99923	-6.34919	1.56455e-08	0.000111885	1.56455e-08	0.001	0.0114827
chr19:51920613_rs1010425	TCONS_00017251_SIGLEC10	-5.44782	-6.32752	1.71378e-08	8.17068e-05	1.71378e-08	0.001	0.0114827
chr6:31555392_rs2256974	TCONS_00027058_LST1	3.46753	6.32227	1.75201e-08	2.448e-05	1.75201e-08	0.001	0.0114827
chr10:30731491_rs303435	TCONS_00003658_MAP3K8	6.95821	6.3102	1.84311e-08	0.000144166	1.84311e-08	0.001	0.0114827
chr3:75869150_rs9865151	TCONS_00120194_add_LOC401074	20.2754	6.30568	1.87843e-08	9.70388e-05	1.87843e-08	0.001	0.0114827
chr19:46308716_rs2879934	TCONS_00016959_DMPK	7.3678	6.29539	1.96134e-08	9.11754e-05	1.96134e-08	0.001	0.0114827
chr5:180232480_rs58072284	TCONS_00026696_MGAT1	-6.65396	-6.27392	2.14615e-08	8.35998e-05	2.14615e-08	0.001	0.0114827
chr19:52130925_rs8108074	TCONS_00017256_SIGLEC5	19.5501	6.26275	2.24903e-08	0.000101507	2.24903e-08	0.001	0.0114827
chr6:31540141_rs2239704	TCONS_00027051_LST1	2.27168	6.24528	2.4197e-08	3.29886e-05	2.4197e-08	0.001	0.0114827
chr20:34431377_rs141841650	TCONS_00020694_SCAND1	-12.263	-6.24367	2.43612e-08	5.83902e-05	2.43612e-08	0.001	0.0114827
chr20:34431377_rs141841650	TCONS_00020693_SCAND1	12.263	6.24367	2.43612e-08	5.83902e-05	2.43612e-08	0.001	0.0114827
chr19:48609140_rs12981851	TCONS_00017030_PLA2G4C	16.2053	6.24339	2.43896e-08	0.000109123	2.43896e-08	0.001	0.0114827
chr7:99355975_rs3735451	TCONS_00029109_ARPC1B	-2.99387	-6.23731	2.50185e-08	0.000164017	2.50185e-08	0.001	0.0114827
chr1:111642031_rs11102212	TCONS_00002596_DRAM2	5.5349	6.23098	2.56897e-08	0.00014293	2.56897e-08	0.001	0.0114827
chr7:23727960_rs13237857	TCONS_00153517_add_FAM221A	-7.91351	-6.22121	2.6762e-08	0.000170598	2.6762e-08	0.001	0.0114827
chr19:14880806_rs3829680	TCONS_00016659_EMR2	8.39627	6.21167	2.7852e-08	0.000123154	2.7852e-08	0.001	0.0114827
chr10:100192903_rs11593280	TCONS_00004605_HPS1	3.51469	6.21097	2.79333e-08	0.000207264	2.79333e-08	0.001	0.0114827
chr17:33578415_rs11654843	TCONS_00012989_SLFN5	12.8817	6.19732	2.95726e-08	0.000205188	2.95726e-08	0.001	0.0114827
chr17:33578415_rs11654843	TCONS_00012993_SLFN5	-12.8817	-6.19732	2.95726e-08	0.000205188	2.95726e-08	0.001	0.0114827
chr13:44503677_rs1596760	TCONS_00008560_LACC1	-12.2288	-6.18505	3.11292e-08	0.00046327	3.11292e-08	0.001	0.0114827
chr1:89440804_rs12065833	TCONS_00002489_CCBL2	-3.44423	-6.17347	3.26711e-08	0.000176943	3.26711e-08	0.001	0.0114827
chr16:31002720_rs8060857	TCONS_00011591_HSD3B7	-12.1216	-6.17126	3.29729e-08	0.000332062	3.29729e-08	0.001	0.0114827
chr13:113536627_rs1278769	TCONS_00008713_ATP11A	9.4766	6.16917	3.32628e-08	0.00048913	3.32628e-08	0.001	0.0114827
chr5:68856679_rs2243524	TCONS_00026171_GUSBP3	-1.3712	-6.16546	3.3782e-08	0.000120619	3.3782e-08	0.001	0.0114827
chr2:75103322_rs3771763	TCONS_00017777_HK2	3.68711	6.14142	3.73445e-08	0.000224138	3.73445e-08	0.001	0.0114827
chr2:75103322_rs3771763	TCONS_00017778_HK2	-3.68711	-6.14142	3.73445e-08	0.000224138	3.73445e-08	0.001	0.0114827
chr3:156862041_rs6809307	TCONS_00023913_CCNL1	-3.40993	-6.13683	3.80648e-08	0.000174473	3.80648e-08	0.001	0.0114827
chr19:36234489_rs28656784	TCONS_00016779_IGFLR1	-3.38949	-6.12882	3.93577e-08	0.000168503	3.93577e-08	0.001	0.0114827
chr7:99932049_rs7384878	TCONS_00029145_PILRB	-3.52751	-6.11779	4.12071e-08	0.000244016	4.12071e-08	0.001	0.0114827
chr4:8355472_rs13102851	TCONS_00024676_ACOX3	-2.05411	-6.11294	4.20485e-08	0.000122788	4.20485e-08	0.001	0.0114827
chr9:88714489_rs191559811	TCONS_00032360_GOLM1	12.7242	6.103	4.38238e-08	0.000629561	4.38238e-08	0.001	0.0114827
chr9:88714489_rs191559811	TCONS_00032357_GOLM1	-12.7242	-6.103	4.38238e-08	0.000629561	4.38238e-08	0.001	0.0114827
chr3:98323751_rs2315826	TCONS_00124612_add_ST3GAL6-AS1	-15.6429	-6.09647	4.50311e-08	0.000202378	4.50311e-08	0.001	0.0114827
chr17:46142680_rs11079806	TCONS_00013252_SNX11	-7.84018	-6.09289	4.5707e-08	0.000286878	4.5707e-08	0.001	0.0114827
chr9:79327732_rs537903	TCONS_00175027_add_PRUNE2	9.16553	6.08868	4.6514e-08	0.000666336	4.6514e-08	0.001	0.0114827
chr5:79717928_rs3096111	TCONS_00025591_ZFYVE16	5.76518	6.07775	4.86758e-08	0.000167646	4.86758e-08	0.001	0.0114827
chr15:78598931_rs12593776	TCONS_00011027_WDR61	-12.8836	-6.07594	4.90426e-08	0.000473018	4.90426e-08	0.001	0.0114827
chr15:78598931_rs12593776	TCONS_00011029_WDR61	12.8836	6.07594	4.90426e-08	0.000473018	4.90426e-08	0.001	0.0114827
chr2:10548826_rs3771130	TCONS_00017472_HPCAL1	4.76795	6.06403	5.1532e-08	0.000304347	5.1532e-08	0.001	0.0114827
chr2:218939630_rs10932744	TCONS_00018503_RUFY4	4.49455	6.04479	5.58152e-08	0.000329169	5.58152e-08	0.001	0.0114827
chr5:93915009_rs7707464	TCONS_00026247_MCTP1	-6.61073	-6.0349	5.81525e-08	0.000195628	5.81525e-08	0.001	0.0114827
chr5:94255391_rs6877335	TCONS_00026248_MCTP1	-13.5492	-6.03004	5.93373e-08	0.000199363	5.93373e-08	0.001	0.0114827
chr19:3503942_rs8113204	TCONS_00016404_MFSD12	-3.48249	-6.03	5.93468e-08	0.000244826	5.93468e-08	0.001	0.0114827
chr1:40810783_rs12094918	TCONS_00000437_SMAP2	-5.1613	-6.02285	6.11321e-08	0.000311296	6.11321e-08	0.001	0.0114827
chr6:31885930_rs116477171	TCONS_00027079_HSPA1B	-28.873	-6.01539	6.30513e-08	7.88427e-05	6.30513e-08	0.001	0.0114827
chr6:31885930_rs116477171	TCONS_00027084_HSPA1B	28.873	6.01539	6.30513e-08	7.88427e-05	6.30513e-08	0.001	0.0114827
chr1:47158266_rs61782563	TCONS_00002351_EFCAB14	-6.86046	-6.00854	6.48663e-08	0.000328845	6.48663e-08	0.001	0.0114827
chr6:24721040_rs3813685	TCONS_00027815_C6orf62	-2.0522	-6.00596	6.55654e-08	8.16632e-05	6.55654e-08	0.001	0.0114827
chr6:24721040_rs3813685	TCONS_00027813_C6orf62	2.0522	6.00596	6.55654e-08	8.16632e-05	6.55654e-08	0.001	0.0114827
chr1:79094081_rs1333973	TCONS_00000592_IFI44L	9.09214	6.0015	6.67874e-08	0.000337834	6.67874e-08	0.001	0.0114827
chr13:113534382_rs1278766	TCONS_00008715_ATP11A	-6.9059	-6.00057	6.70437e-08	0.000890472	6.70437e-08	0.001	0.0114827
chr5:94252861_rs159349	TCONS_00026250_MCTP1	10.0968	5.98666	7.10191e-08	0.000231491	7.10191e-08	0.001	0.0114827
chr22:21216695_rs165598	TCONS_00021724_PI4KA	-5.13285	-5.98391	7.18291e-08	0.00029452	7.18291e-08	0.001	0.0114827
chr7:102380546_rs6943840	TCONS_00030026_RASA4	7.08029	5.97713	7.38742e-08	0.000380112	7.38742e-08	0.001	0.0114827
chr5:102310166_rs3733939	TCONS_00025671_PAM	-4.03536	-5.97434	7.47293e-08	0.000242698	7.47293e-08	0.001	0.0114827
chr22:29654004_rs909798	TCONS_00021399_GAS2L1	5.39342	5.97204	7.54434e-08	0.0003074	7.54434e-08	0.001	0.0114827
chr7:150498836_rs2075079	TCONS_00030295_TMEM176B	-3.48638	-5.96757	7.68529e-08	0.00039334	7.68529e-08	0.001	0.0114827
chr7:150498836_rs2075079	TCONS_00030294_TMEM176B	3.48638	5.96757	7.68529e-08	0.00039334	7.68529e-08	0.001	0.0114827
chr10:29834259_rs4590758	TCONS_00004331_SVIL	9.77369	5.96722	7.69648e-08	0.000486022	7.69648e-08	0.001	0.0114827
chr10:50367977_rs2804935	TCONS_00004412_C10orf128	-2.61373	-5.96563	7.74717e-08	0.000487114	7.74717e-08	0.001	0.0114827
chr11:63927810_rs11603212	TCONS_00006295_TRPT1	-10.5683	-5.95471	8.10465e-08	0.000151876	8.10465e-08	0.001	0.0114827
chr12:133499481_rs1278601	TCONS_00043313_add_ZNF605	-5.36302	-5.95291	8.16528e-08	0.000379321	8.16528e-08	0.001	0.0114827
chr17:2275017_rs58713812	TCONS_00012580_SGSM2	7.88127	5.9522	8.18915e-08	0.000469607	8.18915e-08	0.001	0.0114827
chr3:49151001_rs4364202	TCONS_00022451_WDR6	9.84787	5.92899	9.01261e-08	0.000369927	9.01261e-08	0.001	0.0114827
chr8:30019582_rs7844678	TCONS_00030504_LEPROTL1	1.62354	5.92478	9.17044e-08	0.000395708	9.17044e-08	0.001	0.0114827
chr8:30019582_rs7844678	TCONS_00030503_LEPROTL1	-1.62354	-5.92478	9.17044e-08	0.000395708	9.17044e-08	0.001	0.0114827
chr12:69048936_rs12316768	TCONS_00007231_RAP1B	-2.0852	-5.91659	9.48546e-08	0.000434783	9.48546e-08	0.001	0.0114827
chr16:30916430_rs8052245	TCONS_00011589_HSD3B7	6.7107	5.90889	9.79124e-08	0.00073862	9.79124e-08	0.001	0.0114827
chr2:102764609_rs10153578	TCONS_00017920_IL1R1	-3.72555	-5.90026	1.01456e-07	0.000576789	1.01456e-07	0.001	0.0114827
chr15:38546982_rs7175472	TCONS_00010196_SPRED1	-1.15859	-5.89964	1.01717e-07	0.00085012	1.01717e-07	0.001	0.0114827
chr7:29034840_rs1012090	TCONS_00029658_CPVL	1.54284	5.89096	1.05418e-07	0.000519451	1.05418e-07	0.001	0.0114827
chr7:29034840_rs1012090	TCONS_00029659_CPVL	-1.54284	-5.89096	1.05418e-07	0.000519451	1.05418e-07	0.001	0.0114827
chr14:65389250_rs10131002	TCONS_00009345_CHURC1-FNTB	-4.01209	-5.87851	1.10963e-07	0.000248068	1.10963e-07	0.001	0.0114827
chr11:626220_rs12280580	TCONS_00005831_IRF7	7.66235	5.87764	1.11362e-07	0.000204711	1.11362e-07	0.001	0.0114827
chr7:128419011_rs339037	TCONS_00029303_CALU	1.41519	5.87763	1.11363e-07	0.000543196	1.11363e-07	0.001	0.0114827
chr7:128419011_rs339037	TCONS_00029299_CALU	-1.41519	-5.87763	1.11363e-07	0.000543196	1.11363e-07	0.001	0.0114827
chr7:35673799_rs2305333	TCONS_00029683_HERPUD2	-3.79271	-5.87481	1.12667e-07	0.000548706	1.12667e-07	0.001	0.0114827
chr12:133499481_rs1278601	TCONS_00043296_add_ZNF605	5.51049	5.84499	1.27357e-07	0.000572558	1.27357e-07	0.001	0.0114827
chr15:63224506_rs6494371	TCONS_00010333_TPM1	-13.5959	-5.84201	1.28927e-07	0.00104326	1.28927e-07	0.001	0.0114827
chr15:63224506_rs6494371	TCONS_00010334_TPM1	13.5959	5.84201	1.28927e-07	0.00104326	1.28927e-07	0.001	0.0114827
chr11:941941_rs10751667	TCONS_00004811_AP2A2	4.71518	5.83103	1.34871e-07	0.00024495	1.34871e-07	0.001	0.0114827
chr4:1327952_rs11247993	TCONS_00128821_add_UVSSA	1.25849	5.80066	1.52756e-07	0.000387042	1.52756e-07	0.001	0.0114827
chr17:4690038_rs8078118	TCONS_00013713_VMO1	28.0683	5.80063	1.52778e-07	0.000769657	1.52778e-07	0.001	0.0114827
chr17:4690038_rs8078118	TCONS_00013714_VMO1	-28.0683	-5.80063	1.52778e-07	0.000769657	1.52778e-07	0.001	0.0114827
chr6:26343057_rs9379850	TCONS_00026878_BTN3A2	12.1641	5.7955	1.5602e-07	0.000178369	1.5602e-07	0.001	0.0114827
chr17:18263571_rs8067462	TCONS_00012868_SMCR8	-5.65424	-5.78162	1.65146e-07	0.000823741	1.65146e-07	0.001	0.0114827
chr17:18263571_rs8067462	TCONS_00012869_SMCR8	5.65424	5.78162	1.65146e-07	0.000823741	1.65146e-07	0.001	0.0114827
chr12:10276314_rs57078967	TCONS_00007677_CLEC7A	8.64521	5.78032	1.66023e-07	0.000725263	1.66023e-07	0.001	0.0114827
chr7:33017440_rs12536511	TCONS_00028779_AVL9	4.36323	5.7773	1.68087e-07	0.000744563	1.68087e-07	0.001	0.0114827
chr7:33017440_rs12536511	TCONS_00028777_AVL9	-4.36323	-5.7773	1.68087e-07	0.000744563	1.68087e-07	0.001	0.0114827
chr22:50638953_rs1009610	TCONS_00021669_SELO	-6.58797	-5.75986	1.80513e-07	0.000673797	1.80513e-07	0.001	0.0114827
chr1:213039379_rs12119818	TCONS_00014206_add_FLVCR1-AS1	-33.9273	-5.7551	1.84063e-07	0.000841227	1.84063e-07	0.001	0.0114827
chr15:83522745_rs12442119	TCONS_00011057_HOMER2	-2.05598	-5.75147	1.86815e-07	0.00143467	1.86815e-07	0.001	0.0114827
chr6:160084405_rs12195452	TCONS_00027674_MRPL18	-9.18446	-5.7413	1.94735e-07	0.000218206	1.94735e-07	0.001	0.0114827
chr12:47600432_rs2408718	TCONS_00007767_PCED1B-AS1	-8.25507	-5.74073	1.95188e-07	0.000836742	1.95188e-07	0.001	0.0114827
chr7:30538090_rs38408	TCONS_00029668_GGCT	-2.93097	-5.73692	1.98251e-07	0.000802846	1.98251e-07	0.001	0.0114827
chr7:30538090_rs38408	TCONS_00029667_GGCT	2.93097	5.73692	1.98251e-07	0.000802846	1.98251e-07	0.001	0.0114827
chr1:207798238_rs10863418	TCONS_00001659_CR1	12.1169	5.72339	2.09501e-07	0.000946876	2.09501e-07	0.001	0.0114827
chr13:44503677_rs1596760	TCONS_00008563_LACC1	7.37439	5.71976	2.12632e-07	0.00189788	2.12632e-07	0.001	0.0114827
chr5:79726341_rs140502218	TCONS_00025592_ZFYVE16	-7.32754	-5.71138	2.20017e-07	0.000617177	2.20017e-07	0.001	0.0114827
chr7:76274286_rs147693721	TCONS_00029068_DTX2	16.0421	5.70463	2.26154e-07	0.00089457	2.26154e-07	0.001	0.0114827
chr7:76274286_rs147693721	TCONS_00029069_DTX2	-16.0421	-5.70463	2.26154e-07	0.00089457	2.26154e-07	0.001	0.0114827
chr7:35734243_rs62454607	TCONS_00029680_HERPUD2	3.193	5.69504	2.35165e-07	0.000921915	2.35165e-07	0.001	0.0114827
chr11:60173360_rs4938941	TCONS_00005126_MS4A7	-2.10971	-5.69503	2.35179e-07	0.000412072	2.35179e-07	0.001	0.0114827
chr5:52062052_rs11950861	TCONS_00025423_ITGA1	5.60409	5.68844	2.41576e-07	0.000671669	2.41576e-07	0.001	0.0114827
chr5:52062052_rs11950861	TCONS_00025424_ITGA1	-5.60409	-5.68844	2.41576e-07	0.000671669	2.41576e-07	0.001	0.0114827
chr12:110353820_rs16940683	TCONS_00008150_GIT2	3.14261	5.67482	2.55342e-07	0.00107192	2.55342e-07	0.001	0.0114827
chr17:34869155_rs8882	TCONS_00013059_GGNBP2	-10.3761	-5.67261	2.57642e-07	0.00119453	2.57642e-07	0.001	0.0114827
chr6:31497399_rs115924833	TCONS_00148348_add_ATP6V1G2-DDX39B	15.4779	5.66245	2.68508e-07	0.000290362	2.68508e-07	0.001	0.0114827
chr6:31497399_rs115924833	TCONS_00148349_add_ATP6V1G2-DDX39B	-15.4779	-5.66245	2.68508e-07	0.000290362	2.68508e-07	0.001	0.0114827
chr1:113107826_rs7540251	TCONS_00002611_RHOC	5.75706	5.66085	2.70266e-07	0.00119734	2.70266e-07	0.001	0.0114827
chr1:113107826_rs7540251	TCONS_00002610_RHOC	-5.75706	-5.66085	2.70266e-07	0.00119734	2.70266e-07	0.001	0.0114827
chr20:16710791_rs2073055	TCONS_00019871_SNRPB2	-8.47949	-5.65951	2.71734e-07	0.000485825	2.71734e-07	0.001	0.0114827
chr20:16710791_rs2073055	TCONS_00019870_SNRPB2	8.47949	5.65951	2.71734e-07	0.000485825	2.71734e-07	0.001	0.0114827
chr12:124431519_rs34180676	TCONS_00008333_CCDC92	7.23393	5.64944	2.83086e-07	0.00117336	2.83086e-07	0.001	0.0114827
chr12:124431519_rs34180676	TCONS_00008330_CCDC92	-7.23393	-5.64944	2.83086e-07	0.00117336	2.83086e-07	0.001	0.0114827
chr9:128901785_rs58962955	TCONS_00031916_RABEPK	5.01709	5.6478	2.84973e-07	0.00247018	2.84973e-07	0.001	0.0114827
chr9:128901785_rs58962955	TCONS_00031915_RABEPK	-5.01709	-5.6478	2.84973e-07	0.00247018	2.84973e-07	0.001	0.0114827
chr17:38112774_rs67480438	TCONS_00013092_GSDMA	30.4271	5.64525	2.87941e-07	0.00131613	2.87941e-07	0.001	0.0114827
chr17:38112774_rs67480438	TCONS_00013093_GSDMA	-30.4271	-5.64525	2.87941e-07	0.00131613	2.87941e-07	0.001	0.0114827
chr22:51021599_rs131756	TCONS_00022157_CHKB-CPT1B	-4.82605	-5.63492	3.00277e-07	0.00104142	3.00277e-07	0.001	0.0114827
chr17:76992511_rs4789904	TCONS_00014587_CANT1	3.79293	5.62108	3.17614e-07	0.00141519	3.17614e-07	0.001	0.0114827
chr16:21951415_rs4783432	TCONS_00012166_RRN3P1	11.6053	5.61545	3.24935e-07	0.0020044	3.24935e-07	0.001	0.0114827
chr9:71392257_rs61453631	TCONS_00032308_AK057188	-4.34902	-5.61065	3.3132e-07	0.00281468	3.3132e-07	0.001	0.0114827
chr9:34324168_rs10814098	TCONS_00031595_NUDT2	11.5398	5.60663	3.36763e-07	0.00285144	3.36763e-07	0.001	0.0114827
chr2:44748060_rs35609435	TCONS_00018954_PREPL	7.2553	5.60621	3.37332e-07	0.00178317	3.37332e-07	0.001	0.0114827
chr15:89427821_rs4932440	TCONS_00011074_HAPLN3	-9.48682	-5.5995	3.46635e-07	0.00233203	3.46635e-07	0.001	0.0114827
chr19:51920613_rs1010425	TCONS_00017242_SIGLEC10	7.77998	5.59206	3.5722e-07	0.00132629	3.5722e-07	0.001	0.0114827
chr19:21503804_rs632221	TCONS_00083849_add_ZNF738	15.299	5.58993	3.60321e-07	0.00133491	3.60321e-07	0.001	0.0114827
chr10:27074012_rs10741118	TCONS_00004309_ABI1	4.83668	5.58787	3.6334e-07	0.00165622	3.6334e-07	0.001	0.0114827
chr3:99936137_rs62281663	TCONS_00022633_TBC1D23	-6.88804	-5.58429	3.68642e-07	0.00125151	3.68642e-07	0.001	0.0114827
chr3:99936137_rs62281663	TCONS_00022637_TBC1D23	6.88804	5.58429	3.68642e-07	0.00125151	3.68642e-07	0.001	0.0114827
chr6:31229279_rs115431833	TCONS_00027878_HLA-C	-0.844251	-5.58324	3.70204e-07	0.000383481	3.70204e-07	0.001	0.0114827
chr6:31229279_rs115431833	TCONS_00027879_HLA-C	0.844251	5.58324	3.70204e-07	0.000383481	3.70204e-07	0.001	0.0114827
chr11:502217_rs7944548	TCONS_00005790_RNH1	2.42336	5.58016	3.74849e-07	0.000604035	3.74849e-07	0.001	0.0114827
chr20:1882954_rs6035018	TCONS_00020282_SIRPB1	-18.7897	-5.57833	3.77623e-07	0.000658067	3.77623e-07	0.001	0.0114827
chr20:1882954_rs6035018	TCONS_00020272_SIRPB1	18.7897	5.57833	3.77623e-07	0.000658067	3.77623e-07	0.001	0.0114827
chr19:55966971_rs12462602	TCONS_00017415_ISOC2	11.292	5.57771	3.78569e-07	0.00140005	3.78569e-07	0.001	0.0114827
chr19:55966971_rs12462602	TCONS_00017416_ISOC2	-11.292	-5.57771	3.78569e-07	0.00140005	3.78569e-07	0.001	0.0114827
chr22:21178464_rs165699	TCONS_00021723_PI4KA	5.56227	5.56064	4.05617e-07	0.00132383	4.05617e-07	0.001	0.0114827
chr13:60968283_rs61970117	TCONS_00008659_TDRD3	16.3841	5.5579	4.10128e-07	0.00315638	4.10128e-07	0.001	0.0114827
chr15:50717205_rs55982633	TCONS_00010812_SPPL2A	4.99437	5.55328	4.17842e-07	0.00271245	4.17842e-07	0.001	0.0114827
chr15:50717205_rs55982633	TCONS_00010818_SPPL2A	-4.99437	-5.55328	4.17842e-07	0.00271245	4.17842e-07	0.001	0.0114827
chr7:38392144_rs58534760	TCONS_00029696_Y00482	-35.1257	-5.55309	4.1817e-07	0.00143955	4.1817e-07	0.001	0.0114827
chr2:10548826_rs3771130	TCONS_00017479_HPCAL1	-4.79161	-5.54656	4.29335e-07	0.00224493	4.29335e-07	0.001	0.0114827
chr14:74749769_rs2884499	TCONS_00009911_ABCD4	5.629	5.54069	4.39632e-07	0.000852953	4.39632e-07	0.001	0.0114827
chr3:17780853_rs62238360	TCONS_00023238_TBC1D5	5.57336	5.52142	4.75138e-07	0.00154332	4.75138e-07	0.001	0.0114827
chr19:50168927_rs2304205	TCONS_00017057_IRF3	-3.10364	-5.51685	4.83957e-07	0.00174478	4.83957e-07	0.001	0.0114827
chr17:78191030_rs9900502	TCONS_00072814_add_CARD14	-10.6055	-5.51413	4.89298e-07	0.00200585	4.89298e-07	0.001	0.0114827
chr4:26178155_rs6831164	TCONS_00024202_RBPJ	-6.70249	-5.51159	4.94319e-07	0.00106956	4.94319e-07	0.001	0.0114827
chr14:24855515_rs12888176	TCONS_00009744_RIPK3	3.01909	5.50752	5.0249e-07	0.000962666	5.0249e-07	0.001	0.0114827
chr14:24855515_rs12888176	TCONS_00009745_RIPK3	-3.01909	-5.50752	5.0249e-07	0.000962666	5.0249e-07	0.001	0.0114827
chr12:109013319_rs73191241	TCONS_00008121_SELPLG	16.5427	5.49831	5.21455e-07	0.00195218	5.21455e-07	0.001	0.0114827
chr18:61620766_rs9945924	TCONS_00014903_SERPINB8	-7.45471	-5.49642	5.25429e-07	0.00736925	5.25429e-07	0.001	0.0114827
chr7:6617247_rs11559147	TCONS_00028683_ZDHHC4	9.80804	5.44588	6.43642e-07	0.00201627	6.43642e-07	0.001	0.0114827
chr17:34869155_rs8882	TCONS_00013058_GGNBP2	9.96006	5.44151	6.55017e-07	0.00258345	6.55017e-07	0.001	0.0114827
chr7:102339500_rs55867734	TCONS_00030022_RASA4	-7.0939	-5.43827	6.63589e-07	0.00204321	6.63589e-07	0.001	0.0114827
chr2:73436361_rs7600966	TCONS_00019113_PRADC1	-3.05933	-5.43693	6.67155e-07	0.00341209	6.67155e-07	0.001	0.0114827
chr2:73436361_rs7600966	TCONS_00019112_PRADC1	3.05933	5.43693	6.67155e-07	0.00341209	6.67155e-07	0.001	0.0114827
chr10:74755520_rs12261579	TCONS_00004482_DNAJC9	4.03486	5.43343	6.76575e-07	0.0025241	6.76575e-07	0.001	0.0114827
chr19:51727962_rs3865444	TCONS_00015987_CD33	-7.49932	-5.42778	6.92067e-07	0.00242782	6.92067e-07	0.001	0.0114827
chr11:82872530_rs11233498	TCONS_00006473_RAB30	-4.51227	-5.41882	7.17329e-07	0.00107236	7.17329e-07	0.001	0.0114827
chr11:82872530_rs11233498	TCONS_00006472_RAB30	4.51227	5.41882	7.17329e-07	0.00107236	7.17329e-07	0.001	0.0114827
chr1:222718718_rs17011628	TCONS_00001718_MIA3	4.82744	5.40767	7.50027e-07	0.00302573	7.50027e-07	0.001	0.0114827
chr7:141362693_rs2269984	TCONS_00030224_KIAA1147	-8.34678	-5.39861	7.77693e-07	0.00221146	7.77693e-07	0.001	0.0114827
chr13:114527772_rs7399637	TCONS_00045920_add_GAS6-AS1	5.90365	5.37663	8.49021e-07	0.00542141	8.49021e-07	0.001	0.0114827
chr2:145271250_rs116497883	TCONS_00019360_ZEB2	1.45256	5.37245	8.63295e-07	0.00430824	8.63295e-07	0.001	0.0114827
chr17:27907313_rs3115097	TCONS_00012934_TP53I13	3.5651	5.36434	8.91643e-07	0.00340502	8.91643e-07	0.001	0.0114827
chr10:1491339_rs1533484	TCONS_00003468_WDR37	6.82426	5.35238	9.35189e-07	0.00320265	9.35189e-07	0.001	0.0114827
chr2:74729481_rs11676323	TCONS_00019130_CCDC142	5.14894	5.33629	9.97017e-07	0.00488354	9.97017e-07	0.001	0.0114827
chr4:185568113_rs2720378	TCONS_00025225_CASP3	-7.76535	-5.33078	1.01912e-06	0.00202953	1.01912e-06	0.001	0.0114827
chr14:91632771_rs10873405	TCONS_00009494_C14orf159	5.75421	5.31547	1.08302e-06	0.0018778	1.08302e-06	0.001	0.0114827
chr10:100191876_rs11599112	TCONS_00004583_HPS1	-3.24586	-5.31489	1.08552e-06	0.00364274	1.08552e-06	0.001	0.0114827
chr2:175347650_rs12614738	TCONS_00019467_GPR155	-4.6926	-5.31074	1.10358e-06	0.00534809	1.10358e-06	0.001	0.0114827
chr7:131944273_rs10954368	TCONS_00030177_CHCHD3	-5.18761	-5.3026	1.13978e-06	0.00294669	1.13978e-06	0.001	0.0114827
chr7:131944273_rs10954368	TCONS_00030178_CHCHD3	5.18761	5.3026	1.13978e-06	0.00294669	1.13978e-06	0.001	0.0114827
chr19:10311354_rs876040	TCONS_00016527_DNMT1	3.86446	5.29962	1.15338e-06	0.00391163	1.15338e-06	0.001	0.0114827
chr19:53119765_rs4801924	TCONS_00017276_ZNF83	-3.97825	-5.29041	1.19627e-06	0.00403895	1.19627e-06	0.001	0.0114827
chr7:65465940_rs1631091	TCONS_00029821_GUSB	2.7628	5.28572	1.2187e-06	0.00312463	1.2187e-06	0.001	0.0114827
chr7:65465940_rs1631091	TCONS_00029822_GUSB	-2.7628	-5.28572	1.2187e-06	0.00312463	1.2187e-06	0.001	0.0114827
chr12:109014756_rs8179151	TCONS_00008119_SELPLG	-30.5101	-5.28198	1.23692e-06	0.00387435	1.23692e-06	0.001	0.0114827
chr6:29722160_rs141264379	TCONS_00026933_HLA-G	-9.93055	-5.28166	1.23847e-06	0.00111448	1.23847e-06	0.001	0.0114827
chr6:13797934_rs138710450	TCONS_00027776_MCUR1	5.17747	5.26307	1.33309e-06	0.00119001	1.33309e-06	0.001	0.0114827
chr6:13797934_rs138710450	TCONS_00027777_MCUR1	-5.17747	-5.26307	1.33309e-06	0.00119001	1.33309e-06	0.001	0.0114827
chr6:29690228_rs145589747	TCONS_00026908_HLA-F	-10.4622	-5.26045	1.34697e-06	0.00120015	1.34697e-06	0.001	0.0114827
chr4:76650443_rs7662940	TCONS_00024300_USO1	0.467891	5.24627	1.4246e-06	0.00259472	1.4246e-06	0.001	0.0114827
chr4:76650443_rs7662940	TCONS_00024301_USO1	-0.467891	-5.24627	1.4246e-06	0.00259472	1.4246e-06	0.001	0.0114827
chr1:67280515_rs7550905	TCONS_00000555_PDE4B	-11.0905	-5.23631	1.4818e-06	0.00548822	1.4818e-06	0.001	0.0114827
chr1:67280515_rs7550905	TCONS_00000554_PDE4B	11.0905	5.23631	1.4818e-06	0.00548822	1.4818e-06	0.001	0.0114827
chr2:190536283_rs893784	TCONS_00019524_ORMDL1	2.93201	5.23455	1.49209e-06	0.007064	1.49209e-06	0.001	0.0114827
chr16:88854507_rs474632	TCONS_00012508_PIEZO1	4.16268	5.2188	1.58775e-06	0.00741922	1.58775e-06	0.001	0.0114827
chr7:38320789_rs56400937	TCONS_00029692_TRGC2	10.0361	5.21536	1.60948e-06	0.0038177	1.60948e-06	0.001	0.0114827
chr7:38320789_rs56400937	TCONS_00029693_TRGC2	-10.0361	-5.21536	1.60948e-06	0.0038177	1.60948e-06	0.001	0.0114827
chr12:57870648_rs512490	TCONS_00007985_ARHGAP9	7.43758	5.2147	1.61362e-06	0.0048491	1.61362e-06	0.001	0.0114827
chr7:80301936_rs1405747	TCONS_00029082_CD36	-2.72296	-5.19979	1.7113e-06	0.00398227	1.7113e-06	0.001	0.0114827
chr17:39944655_rs2353022	TCONS_00014089_JUP	-10.0654	-5.19709	1.72954e-06	0.00607268	1.72954e-06	0.001	0.0114827
chr3:14981262_rs6442490	TCONS_00023208_FGD5-AS1	2.56078	5.19255	1.76074e-06	0.0042688	1.76074e-06	0.001	0.0114827
chr17:33783654_rs12453005	TCONS_00074982_add_TBC1D3C	4.91929	5.18931	1.78332e-06	0.00623325	1.78332e-06	0.001	0.0114827
chr2:174857558_rs6749263	TCONS_00019483_WIPF1	2.81829	5.175	1.88656e-06	0.00862804	1.88656e-06	0.001	0.0114827
chr7:139749346_rs7781964	TCONS_00030207_PARP12	-2.3825	-5.1699	1.92471e-06	0.00435868	1.92471e-06	0.001	0.0114827
chr6:29642194_rs2747419	TCONS_00026910_HLA-G	-6.49926	-5.16083	1.99449e-06	0.00169939	1.99449e-06	0.001	0.0114827
chr22:50881443_rs111249398	TCONS_00022017_PLXNB2	-9.5743	-5.1323	2.23059e-06	0.00568132	2.23059e-06	0.001	0.0114827
chr2:191595538_rs1263137	TCONS_00018268_NAB1	6.3852	5.12675	2.27958e-06	0.0102485	2.27958e-06	0.001	0.0114827
chr17:44848314_rs3809857	TCONS_00075819_add_ARL17A	7.94804	5.12102	2.33125e-06	0.00781004	2.33125e-06	0.001	0.0114827
chr1:46020632_rs2991973	TCONS_00000483_AKR1A1	2.25422	5.10076	2.52345e-06	0.00871956	2.52345e-06	0.001	0.0114827
chr1:47497472_rs55694114	TCONS_00002352_TAL1	-8.14832	-5.08686	2.66419e-06	0.00915231	2.66419e-06	0.001	0.0114827
chr11:57367222_rs1005510	TCONS_00005078_TMX2-CTNND1	0.786854	5.04904	3.08714e-06	0.0039776	3.08714e-06	0.001	0.0114827
chr16:21330488_rs34878175	TCONS_00012168_LOC23117	-10.9938	-5.04868	3.09143e-06	0.0129964	3.09143e-06	0.001	0.0114827
chr17:44662558_rs117692492	TCONS_00075808_add_ARL17A	4.36044	5.03899	3.21014e-06	0.0100245	3.21014e-06	0.001	0.0114827
chr2:190553957_rs920427	TCONS_00019523_ORMDL1	-4.4347	-5.02478	3.39225e-06	0.0143917	3.39225e-06	0.001	0.0114827
chr11:66228951_rs4930376	TCONS_00027757_add_PELI3	-8.96866	-5.00487	3.66466e-06	0.00461545	3.66466e-06	0.001	0.0114827
chr7:99297011_rs2948344	TCONS_00029115_ARPC1B	-1.96652	-4.9745	4.12171e-06	0.00744201	4.12171e-06	0.001	0.0114827
chr14:74756539_rs3213499	TCONS_00009910_ABCD4	-7.49786	-4.89561	5.58528e-06	0.00840786	5.58528e-06	0.001	0.0114827
chr6:29700519_rs115007785	TCONS_00026978_HLA-G	9.85715	4.85365	6.5593e-06	0.00482527	6.5593e-06	0.001	0.0114827
chr6:116130955_rs9384960	TCONS_00027498_FAM26F	3.46914	4.80425	7.91935e-06	0.00566099	7.91935e-06	0.001	0.0114827
chr16:90141355_rs12925933	TCONS_00064256_add_AK302511	7.97301	4.75311	9.61647e-06	0.0260572	9.61647e-06	0.001	0.0114827
chr3:52686716_rs2878632	TCONS_00022529_NISCH	3.41422	4.73087	1.04608e-05	0.0181036	1.04608e-05	0.001	0.0114827
chr11:63937011_rs6591837	TCONS_00006294_TRPT1	10.7668	5.90947	9.76805e-08	0.000180959	9.76805e-08	0.002	0.0211282
chr3:12614380_rs4684107	TCONS_00023194_RAF1	-8.83028	-5.64519	2.88018e-07	0.00101158	2.88018e-07	0.002	0.0211282
chr19:8231843_rs73491607	TCONS_00015299_TRAPPC5	-56.2183	-5.53305	4.53387e-07	0.00164552	4.53387e-07	0.002	0.0211282
chr19:8231843_rs73491607	TCONS_00015300_TRAPPC5	56.2183	5.53305	4.53387e-07	0.00164552	4.53387e-07	0.002	0.0211282
chr7:7607261_rs79680893	TCONS_00028695_MIOS	17.3749	5.50396	5.09728e-07	0.00167122	5.09728e-07	0.002	0.0211282
chr7:139734697_rs757833	TCONS_00030210_PARP12	1.71874	5.49534	5.27726e-07	0.00172104	5.27726e-07	0.002	0.0211282
chr16:84233536_rs7185137	TCONS_00011910_ADAD2	-17.2402	-5.42542	6.98638e-07	0.00375622	6.98638e-07	0.002	0.0211282
chr16:84233536_rs7185137	TCONS_00011917_ADAD2	17.2402	5.42542	6.98638e-07	0.00375622	6.98638e-07	0.002	0.0211282
chr1:112042149_rs3393	TCONS_00002606_ADORA3	2.11594	5.40153	7.68674e-07	0.00308895	7.68674e-07	0.002	0.0211282
chr15:91425232_rs6227	TCONS_00010574_FES	4.23904	5.40153	7.68681e-07	0.00453434	7.68681e-07	0.002	0.0211282
chr20:35945174_rs1806940	TCONS_00020019_MANBAL	7.79494	5.34989	9.44486e-07	0.00142283	9.44486e-07	0.002	0.0211282
chr1:233819750_rs779890	TCONS_00014672_add_U4	43.9491	5.31116	1.10173e-06	0.00426089	1.10173e-06	0.002	0.0211282
chr6:3009944_rs2518581	TCONS_00026776_NQO2	-4.2237	-5.28707	1.2122e-06	0.00109395	1.2122e-06	0.002	0.0211282
chr21:34761663_rs60702473	TCONS_00021172_GART	1.62335	5.27702	1.26145e-06	0.00790715	1.26145e-06	0.002	0.0211282
chr1:227125997_rs7513120	TCONS_00001768_ADCK3	-4.26032	-5.27394	1.27694e-06	0.00485786	1.27694e-06	0.002	0.0211282
chr9:189255_rs145630169	TCONS_00032093_CBWD1	-7.17219	-5.25359	1.38402e-06	0.00832721	1.38402e-06	0.002	0.0211282
chr11:74705696_rs544115	TCONS_00005543_NEU3	-3.99956	-5.24039	1.4581e-06	0.00202099	1.4581e-06	0.002	0.0211282
chr3:53212574_rs2306571	TCONS_00022554_PRKCD	-3.47633	-5.19627	1.73514e-06	0.00421175	1.73514e-06	0.002	0.0211282
chr20:57571763_rs9760	TCONS_00020173_NELFCD	3.55225	5.1957	1.73905e-06	0.00255843	1.73905e-06	0.002	0.0211282
chr15:92728136_rs4778023	TCONS_00010591_SLCO3A1	2.47034	5.18787	1.79346e-06	0.00841959	1.79346e-06	0.002	0.0211282
chr15:92728136_rs4778023	TCONS_00010592_SLCO3A1	-2.47034	-5.18787	1.79346e-06	0.00841959	1.79346e-06	0.002	0.0211282
chr14:39670792_rs189811705	TCONS_00009221_CTAGE5	-4.36581	-5.17938	1.85434e-06	0.00310306	1.85434e-06	0.002	0.0211282
chr14:39670792_rs189811705	TCONS_00009218_CTAGE5	4.36581	5.17938	1.85434e-06	0.00310306	1.85434e-06	0.002	0.0211282
chr19:45384105_rs11083749	TCONS_00015813_PVRL2	2.04457	5.17714	1.87071e-06	0.00608617	1.87071e-06	0.002	0.0211282
chr19:45384105_rs11083749	TCONS_00015815_PVRL2	-2.04457	-5.17714	1.87071e-06	0.00608617	1.87071e-06	0.002	0.0211282
chr2:86471424_rs6730604	TCONS_00017813_MRPL35	4.49329	5.16309	1.97688e-06	0.00899599	1.97688e-06	0.002	0.0211282
chr2:86471424_rs6730604	TCONS_00017814_MRPL35	-4.49329	-5.16309	1.97688e-06	0.00899599	1.97688e-06	0.002	0.0211282
chr3:183443869_rs1812718	TCONS_00023016_KLHL24	4.28162	5.16114	1.99206e-06	0.00476113	1.99206e-06	0.002	0.0211282
chr12:131280130_rs1007246	TCONS_00008401_STX2	9.81444	5.15418	2.04725e-06	0.00577176	2.04725e-06	0.002	0.0211282
chr7:75682306_rs3779421	TCONS_00029876_STYXL1	-7.72354	-5.12677	2.27938e-06	0.00498786	2.27938e-06	0.002	0.0211282
chr10:29834259_rs4590758	TCONS_00004338_SVIL	-8.00033	-5.10009	2.53009e-06	0.00728662	2.53009e-06	0.002	0.0211282
chr17:27434393_rs2279956	TCONS_00013949_MYO18A	-2.63708	-5.0918	2.61326e-06	0.00856732	2.61326e-06	0.002	0.0211282
chr19:46301479_rs8108474	TCONS_00016961_DMPK	-7.55788	-5.08458	2.68799e-06	0.00846469	2.68799e-06	0.002	0.0211282
chr8:74941814_rs6994774	TCONS_00030629_TMEM70	2.90223	5.08193	2.71591e-06	0.00914931	2.71591e-06	0.002	0.0211282
chr8:74941814_rs6994774	TCONS_00030628_TMEM70	-2.90223	-5.08193	2.71591e-06	0.00914931	2.71591e-06	0.002	0.0211282
chr11:865257_rs7482414	TCONS_00005852_CHID1	3.85601	5.06989	2.84647e-06	0.00370045	2.84647e-06	0.002	0.0211282
chr7:44169572_rs17769566	TCONS_00029741_POLD2	8.76638	5.05265	3.04407e-06	0.00588818	3.04407e-06	0.002	0.0211282
chr7:44169572_rs17769566	TCONS_00029742_POLD2	-8.76638	-5.05265	3.04407e-06	0.00588818	3.04407e-06	0.002	0.0211282
chr12:55718919_rs58316942	TCONS_00007908_WIBG	-3.73651	-5.04267	3.16453e-06	0.00841189	3.16453e-06	0.002	0.0211282
chr17:16356432_rs78580958	TCONS_00012851_TRPV2	6.47452	5.04045	3.19194e-06	0.00999111	3.19194e-06	0.002	0.0211282
chr17:26992367_rs9916465	TCONS_00012921_SUPT6H	-3.51763	-5.04043	3.19227e-06	0.00999111	3.19227e-06	0.002	0.0211282
chr17:26992367_rs9916465	TCONS_00012919_SUPT6H	3.51763	5.04043	3.19227e-06	0.00999111	3.19227e-06	0.002	0.0211282
chr17:79205736_rs11655759	TCONS_00014607_SLC38A10	2.20869	5.02356	3.40835e-06	0.010535	3.40835e-06	0.002	0.0211282
chr5:42995994_rs1902101	TCONS_00026111_AK056817	6.15607	5.01874	3.47275e-06	0.00648982	3.47275e-06	0.002	0.0211282
chr22:22169199_rs4821339	TCONS_00021731_MAPK1	-0.477973	-5.00504	3.66217e-06	0.00881592	3.66217e-06	0.002	0.0211282
chr22:22169199_rs4821339	TCONS_00021730_MAPK1	0.477973	5.00504	3.66217e-06	0.00881592	3.66217e-06	0.002	0.0211282
chr10:75042136_rs61058483	TCONS_00004472_P4HA1	-3.67925	-4.99797	3.76396e-06	0.0098282	3.76396e-06	0.002	0.0211282
chr10:75042136_rs61058483	TCONS_00004473_P4HA1	3.67925	4.99797	3.76396e-06	0.0098282	3.76396e-06	0.002	0.0211282
chr16:21333870_rs35367858	TCONS_00011405_LOC23117	11.0059	4.9531	4.47672e-06	0.0171377	4.47672e-06	0.002	0.0211282
chr9:103056267_rs2806701	TCONS_00031803_STX17	3.78349	4.92852	4.92157e-06	0.0210099	4.92157e-06	0.002	0.0211282
chr9:103056267_rs2806701	TCONS_00031802_STX17	-3.78349	-4.92852	4.92157e-06	0.0210099	4.92157e-06	0.002	0.0211282
chr2:161403316_rs72972022	TCONS_00019423_RBMS1	6.91585	4.89495	5.59949e-06	0.0222067	5.59949e-06	0.002	0.0211282
chr22:50991033_rs131777	TCONS_00022162_CHKB-CPT1B	3.99323	4.87895	5.95376e-06	0.013549	5.95376e-06	0.002	0.0211282
chr15:75766672_rs11634863	TCONS_00011000_SIN3A	5.80931	4.78911	8.38876e-06	0.0299097	8.38876e-06	0.002	0.0211282
chr15:75766672_rs11634863	TCONS_00010995_SIN3A	-5.80931	-4.78911	8.38876e-06	0.0299097	8.38876e-06	0.002	0.0211282
chr5:68856679_rs2243524	TCONS_00025490_SMA4	-9.88324	-4.2346	6.50208e-05	0.076096	6.50208e-05	0.002	0.0211282
chr6:32021662_rs2066989	TCONS_00028004_HLA-DRB5	26.8326	5.72185	2.10827e-07	0.000234746	2.10827e-07	0.003	0.0301831
chr1:79108884_rs6693207	TCONS_00000600_IFI44L	-9.83614	-5.70846	2.22652e-07	0.000999978	2.22652e-07	0.003	0.0301831
chr12:26555558_rs3782291	TCONS_00006902_ARNTL2	-12.0519	-5.46801	5.88979e-07	0.00212612	5.88979e-07	0.003	0.0301831
chr7:148728755_rs12667507	TCONS_00030283_PDIA4	2.22893	5.30507	1.12871e-06	0.00292724	1.12871e-06	0.003	0.0301831
chr7:148728755_rs12667507	TCONS_00030282_PDIA4	-2.22893	-5.30507	1.12871e-06	0.00292724	1.12871e-06	0.003	0.0301831
chr5:112230052_rs462692	TCONS_00026283_REEP5	3.65944	5.27976	1.24784e-06	0.00279327	1.24784e-06	0.003	0.0301831
chr5:112230052_rs462692	TCONS_00026282_REEP5	-3.65944	-5.27976	1.24784e-06	0.00279327	1.24784e-06	0.003	0.0301831
chr19:18533642_rs7258465	TCONS_00015526_AK311380	-4.72223	-5.24886	1.4101e-06	0.0047173	1.4101e-06	0.003	0.0301831
chr2:36860062_rs34385621	TCONS_00018901_PRKD3	5.32653	5.2216	1.57035e-06	0.00740463	1.57035e-06	0.003	0.0301831
chr15:75790127_rs8041160	TCONS_00011003_SNUPN	-10.5088	-5.21668	1.60108e-06	0.0078047	1.60108e-06	0.003	0.0301831
chr7:134002828_rs1646738	TCONS_00030186_C7orf49	4.53498	5.16722	1.94512e-06	0.0043887	1.94512e-06	0.003	0.0301831
chr11:62380119_rs12798970	TCONS_00006254_C11orf48	-3.94256	-5.16515	1.96098e-06	0.00265393	1.96098e-06	0.003	0.0301831
chr11:62380119_rs12798970	TCONS_00006255_C11orf48	3.94256	5.16515	1.96098e-06	0.00265393	1.96098e-06	0.003	0.0301831
chr5:35947253_rs3860790	TCONS_00025364_SLC1A3	11.8608	5.14097	2.15607e-06	0.00438272	2.15607e-06	0.003	0.0301831
chr7:150044317_rs143409818	TCONS_00029434_LRRC61	-6.53357	-5.11394	2.39678e-06	0.00515947	2.39678e-06	0.003	0.0301831
chr7:38392144_rs58534760	TCONS_00029697_Y00482	35.8819	5.10223	2.50896e-06	0.00526659	2.50896e-06	0.003	0.0301831
chr11:8899528_rs2742540	TCONS_00005940_DENND5A	1.7502	5.07303	2.81178e-06	0.00365891	2.81178e-06	0.003	0.0301831
chr11:124703462_rs997990	TCONS_00029507_add_ROBO3	22.5249	5.04242	3.16763e-06	0.00406244	3.16763e-06	0.003	0.0301831
chr11:124703462_rs997990	TCONS_00029515_add_ROBO3	-22.5249	-5.04242	3.16763e-06	0.00406244	3.16763e-06	0.003	0.0301831
chr17:48915879_rs7225019	TCONS_00014283_TOB1	7.37781	5.03727	3.23172e-06	0.0100559	3.23172e-06	0.003	0.0301831
chr17:48915879_rs7225019	TCONS_00014282_TOB1	-7.37781	-5.03727	3.23172e-06	0.0100559	3.23172e-06	0.003	0.0301831
chr17:79205736_rs11655759	TCONS_00014606_SLC38A10	-2.20869	-5.02356	3.40835e-06	0.010535	3.40835e-06	0.003	0.0301831
chr11:65740468_rs10896070	TCONS_00005325_BANF1	2.80148	5.01661	3.50152e-06	0.00442253	3.50152e-06	0.003	0.0301831
chr11:65740468_rs10896070	TCONS_00005327_BANF1	-2.80148	-5.01661	3.50152e-06	0.00442253	3.50152e-06	0.003	0.0301831
chr10:18231002_rs722381	TCONS_00003598_MRC1	14.5425	5.00001	3.73422e-06	0.00978401	3.73422e-06	0.003	0.0301831
chr8:42350875_rs62509285	TCONS_00030565_SMIM19	6.68155	4.97339	4.13944e-06	0.012815	4.13944e-06	0.003	0.0301831
chr5:135336561_rs13157444	TCONS_00025766_SLC25A48	3.10753	4.94666	4.58937e-06	0.00834916	4.58937e-06	0.003	0.0301831
chr1:88514369_rs12023184	TCONS_00002486_CCBL2	3.85064	4.91402	5.20397e-06	0.016376	5.20397e-06	0.003	0.0301831
chr15:83507768_rs34541883	TCONS_00011059_HOMER2	-8.1033	-4.89848	5.52408e-06	0.0215779	5.52408e-06	0.003	0.0301831
chr3:105603237_rs74900441	TCONS_00023685_CBLB	-12.2366	-4.88344	5.85225e-06	0.0116372	5.85225e-06	0.003	0.0301831
chr11:64354795_rs11231824	TCONS_00005231_CCDC88B	-6.28798	-4.83358	7.08183e-06	0.00824269	7.08183e-06	0.003	0.0301831
chr1:160470767_rs2025517	TCONS_00002975_USF1	1.92077	4.79514	8.19858e-06	0.0236425	8.19858e-06	0.003	0.0301831
chr1:160470767_rs2025517	TCONS_00002973_USF1	-1.92077	-4.79514	8.19858e-06	0.0236425	8.19858e-06	0.003	0.0301831
chr16:15821246_rs12596141	TCONS_00011365_NDE1	2.55007	4.75788	9.4445e-06	0.0256878	9.4445e-06	0.003	0.0301831
chr3:50024038_rs111439884	TCONS_00022472_RBM6	-3.44429	-4.63587	1.4954e-05	0.0241219	1.4954e-05	0.003	0.0301831
chr6:26401438_rs6912853	TCONS_00026877_BTN3A2	-16.1688	-5.51108	4.95329e-07	0.000497725	4.95329e-07	0.004	0.0388182
chr2:61393175_rs1615070	TCONS_00017671_C2orf74	-6.42401	-5.31024	1.10577e-06	0.00534919	1.10577e-06	0.004	0.0388182
chr2:61393175_rs1615070	TCONS_00017672_C2orf74	6.42401	5.31024	1.10577e-06	0.00534919	1.10577e-06	0.004	0.0388182
chr7:155679981_rs28608959	TCONS_00030334_LMBR1	5.06017	5.2111	1.63669e-06	0.00387097	1.63669e-06	0.004	0.0388182
chr7:155679981_rs28608959	TCONS_00030333_LMBR1	-5.06017	-5.2111	1.63669e-06	0.00387097	1.63669e-06	0.004	0.0388182
chr1:7134852_rs55980487	TCONS_00001981_TNFRSF9	28.9114	5.13696	2.19022e-06	0.00774869	2.19022e-06	0.004	0.0388182
chr14:56224580_rs72622469	TCONS_00009254_FBXO34	3.87061	5.12102	2.33128e-06	0.00380141	2.33128e-06	0.004	0.0388182
chr12:28218371_rs7303740	TCONS_00006917_CCDC91	9.57876	5.09012	2.63048e-06	0.00717798	2.63048e-06	0.004	0.0388182
chr17:61805607_rs2137144	TCONS_00013384_DDX42	-2.54213	-5.07221	2.82083e-06	0.0090981	2.82083e-06	0.004	0.0388182
chr19:18527257_rs7257932	TCONS_00015524_AK311380	4.96327	5.07042	2.84052e-06	0.0088906	2.84052e-06	0.004	0.0388182
chr4:15711933_rs4257653	TCONS_00024162_FAM200B	-4.20385	-5.06054	2.95194e-06	0.00486359	2.95194e-06	0.004	0.0388182
chr4:15711933_rs4257653	TCONS_00024163_FAM200B	4.20385	5.06054	2.95194e-06	0.00486359	2.95194e-06	0.004	0.0388182
chr6:42890251_rs11758978	TCONS_00027315_RPL7L1	-3.57679	-5.05114	3.06204e-06	0.00247203	3.06204e-06	0.004	0.0388182
chr15:59427807_rs4775116	TCONS_00010869_MYO1E	0.298429	5.02766	3.35455e-06	0.0137777	3.35455e-06	0.004	0.0388182
chr15:59427807_rs4775116	TCONS_00010863_MYO1E	-0.298429	-5.02766	3.35455e-06	0.0137777	3.35455e-06	0.004	0.0388182
chr17:8752666_rs12940048	TCONS_00073873_add_LOC284023	31.4426	5.01551	3.51659e-06	0.0108073	3.51659e-06	0.004	0.0388182
chr16:1923216_rs168254	TCONS_00012009_HAGH	5.23683	5.00948	3.5998e-06	0.0144245	3.5998e-06	0.004	0.0388182
chr16:1923216_rs168254	TCONS_00012008_HAGH	-5.23683	-5.00948	3.5998e-06	0.0144245	3.5998e-06	0.004	0.0388182
chr7:35741794_rs2058791	TCONS_00029681_HERPUD2	4.12213	5.00512	3.66111e-06	0.00672157	3.66111e-06	0.004	0.0388182
chr5:139051015_rs10040658	TCONS_00025831_ANKHD1-EIF4EBP3	-2.84059	-4.98828	3.90783e-06	0.00722426	3.90783e-06	0.004	0.0388182
chr5:38855567_rs550248	TCONS_00026091_FYB	13.3567	4.95614	4.42463e-06	0.00805768	4.42463e-06	0.004	0.0388182
chr12:105155923_rs12307007	TCONS_00007354_CHST11	-6.1876	-4.94861	4.55493e-06	0.0116017	4.55493e-06	0.004	0.0388182
chr11:1004276_rs6597949	TCONS_00004809_AP2A2	-4.65241	-4.93066	4.88113e-06	0.00595932	4.88113e-06	0.004	0.0388182
chr19:18916840_rs140933077	TCONS_00015604_GATAD2A	-7.93154	-4.89303	5.64086e-06	0.0162745	5.64086e-06	0.004	0.0388182
chr7:71956314_rs6970120	TCONS_00028976_SBDSP1	-9.36619	-4.89109	5.68292e-06	0.00979923	5.68292e-06	0.004	0.0388182
chr10:50367977_rs2804935	TCONS_00004410_C10orf128	2.66046	4.82793	7.23627e-06	0.0165421	7.23627e-06	0.004	0.0388182
chr6:29704400_rs113333772	TCONS_00026925_HLA-F	-6.05558	-4.52268	2.2787e-05	0.0141236	2.2787e-05	0.004	0.0388182
chr17:27434490_rs7217365	TCONS_00013943_MYO18A	4.64286	5.43672	6.6771e-07	0.00262905	6.6771e-07	0.005	0.0463338
chr19:44072880_rs3213282	TCONS_00016908_XRCC1	8.06443	5.35602	9.21715e-07	0.00317251	9.21715e-07	0.005	0.0463338
chr19:44072880_rs3213282	TCONS_00016907_XRCC1	-8.06443	-5.35602	9.21715e-07	0.00317251	9.21715e-07	0.005	0.0463338
chr10:11897065_rs12357926	TCONS_00003524_CELF2	6.70797	5.30452	1.13115e-06	0.00371879	1.13115e-06	0.005	0.0463338
chr14:49894750_rs10873028	TCONS_00009811_MAP4K5	-13.0043	-5.28839	1.2059e-06	0.00207401	1.2059e-06	0.005	0.0463338
chr12:10249129_rs11053577	TCONS_00007670_CLEC1A	5.74981	5.20178	1.6979e-06	0.00506699	1.6979e-06	0.005	0.0463338
chr12:10249129_rs11053577	TCONS_00007671_CLEC1A	-5.74981	-5.20178	1.6979e-06	0.00506699	1.6979e-06	0.005	0.0463338
chr4:57596159_rs4865145	TCONS_00024270_PAICS	18.9183	5.175	1.88655e-06	0.00327561	1.88655e-06	0.005	0.0463338
chr4:57596159_rs4865145	TCONS_00024271_PAICS	-18.9183	-5.175	1.88655e-06	0.00327561	1.88655e-06	0.005	0.0463338
chr1:7134852_rs55980487	TCONS_00001980_TNFRSF9	-28.9114	-5.13696	2.19022e-06	0.00774869	2.19022e-06	0.005	0.0463338
chr17:75191592_rs117324897	TCONS_00013491_SEC14L1	-3.82486	-5.11283	2.40721e-06	0.00801617	2.40721e-06	0.005	0.0463338
chr17:1003611_rs2277686	TCONS_00013620_PITPNA	-3.58224	-5.10945	2.4392e-06	0.00808623	2.4392e-06	0.005	0.0463338
chr17:1003611_rs2277686	TCONS_00013624_PITPNA	3.58224	5.10945	2.4392e-06	0.00808623	2.4392e-06	0.005	0.0463338
chr13:28177227_rs833087	TCONS_00008501_POLR1D	-2.04143	-5.02475	3.39266e-06	0.0114656	3.39266e-06	0.005	0.0463338
chr13:26795510_rs17436547	TCONS_00008775_RNF6	2.92445	5.00865	3.61131e-06	0.0119145	3.61131e-06	0.005	0.0463338
chr10:18231002_rs722381	TCONS_00003586_MRC1	-14.5425	-5.00001	3.73422e-06	0.00978401	3.73422e-06	0.005	0.0463338
chr2:127969812_rs7591760	TCONS_00019314_MAP3K2	-8.87046	-4.97989	4.0367e-06	0.0166108	4.0367e-06	0.005	0.0463338
chr12:119986082_rs804447	TCONS_00008212_PXN	-2.44214	-4.97344	4.13855e-06	0.0106128	4.13855e-06	0.005	0.0463338
chr7:75682306_rs3779421	TCONS_00029879_STYXL1	5.08829	4.96884	4.21285e-06	0.00758398	4.21285e-06	0.005	0.0463338
chr3:141408035_rs6440030	TCONS_00125851_add_ATR	9.42814	4.92973	4.89866e-06	0.00994122	4.89866e-06	0.005	0.0463338
chr2:70133410_rs34766235	TCONS_00017708_GMCL1	2.38268	4.91684	5.14774e-06	0.0206546	5.14774e-06	0.005	0.0463338
chr3:112271496_rs2638027	TCONS_00023696_ATG3	-2.98721	-4.91004	5.28419e-06	0.0106362	5.28419e-06	0.005	0.0463338
chr3:112271496_rs2638027	TCONS_00023697_ATG3	2.98721	4.91004	5.28419e-06	0.0106362	5.28419e-06	0.005	0.0463338
chr7:128291286_rs71548754	TCONS_00029291_FLJ45340	-14.4057	-4.85881	6.43105e-06	0.0108184	6.43105e-06	0.005	0.0463338
chr7:128291286_rs71548754	TCONS_00029293_FLJ45340	14.4057	4.85881	6.43105e-06	0.0108184	6.43105e-06	0.005	0.0463338
chr10:70337459_rs10998296	TCONS_00003775_SIRT1	-4.12667	-4.84299	6.832e-06	0.0159535	6.832e-06	0.005	0.0463338
chr10:70337459_rs10998296	TCONS_00003773_SIRT1	4.12667	4.84299	6.832e-06	0.0159535	6.832e-06	0.005	0.0463338
chr15:65008034_rs62024012	TCONS_00010915_DPP8	12.9901	4.84279	6.83709e-06	0.0258869	6.83709e-06	0.005	0.0463338
chr15:65008034_rs62024012	TCONS_00010916_DPP8	-12.9901	-4.84279	6.83709e-06	0.0258869	6.83709e-06	0.005	0.0463338
chr11:35277088_rs10742338	TCONS_00004983_CD44	-0.689892	-4.78633	8.47802e-06	0.00964524	8.47802e-06	0.005	0.0463338
chr11:84477797_rs1943709	TCONS_00032531_add_CREBZF	4.10102	4.77661	8.79674e-06	0.00993153	8.79674e-06	0.005	0.0463338
chr2:160148610_rs10169221	TCONS_00019417_RBMS1	5.32565	4.74265	1.00051e-05	0.0346708	1.00051e-05	0.005	0.0463338
chr8:144716155_rs2384929	TCONS_00030835_KIFC2	-5.9952	-4.74115	1.00618e-05	0.0259551	1.00618e-05	0.005	0.0463338
chr8:144716155_rs2384929	TCONS_00030828_KIFC2	5.9952	4.74115	1.00618e-05	0.0259551	1.00618e-05	0.005	0.0463338
chr11:47268550_rs7129661	TCONS_00006090_CELF1	-4.29805	-4.43058	3.19818e-05	0.0293062	3.19818e-05	0.005	0.0463338
chr1:145430065_rs10910815	TCONS_00000826_NBPF10	3.23565	4.18257	7.82773e-05	0.132062	7.82773e-05	0.005	0.0463338

## Sheet: flu 16PCs
SNP	gene	beta	t-stat	p-value	FDR	gene.p.min.p	emp.p	emp.q
chr12:113357193_rs10774671	TCONS_00007433_OAS1	-27.9732	-112.112	5.18861e-190	3.56563e-183	5.18861e-190	0.001	0.00399507
chr4:39457430_rs2687956	TCONS_00024757_RPL9	26.0002	87.2782	1.49281e-167	2.3587e-161	1.49281e-167	0.001	0.00399507
chr1:179863237_rs486906	TCONS_00001440_TOR1AIP1	42.7481	70.3934	1.66021e-148	1.89179e-141	1.66021e-148	0.001	0.00399507
chr3:39449137_rs1803893	TCONS_00022345_RPSA	44.794	69.9268	6.37826e-148	1.10539e-141	6.37826e-148	0.001	0.00399507
chr3:39449137_rs1803893	TCONS_00022346_RPSA	-44.794	-69.9268	6.37826e-148	1.10539e-141	6.37826e-148	0.001	0.00399507
chr19:35506729_rs2290647	TCONS_00015644_GRAMD1A	-32.045	-66.45	1.88794e-143	2.13091e-136	1.88794e-143	0.001	0.00399507
chr14:100840596_rs941928	TCONS_00010022_WARS	33.7799	63.0727	6.72482e-139	2.86911e-132	6.72482e-139	0.001	0.00399507
chr14:100820536_rs3783345	TCONS_00010031_WARS	-26.8388	-57.837	2.16898e-131	9.25384e-126	2.16898e-131	0.001	0.00399507
chr16:2011126_rs758335	TCONS_00012019_TCRBV20S1	27.0765	55.1915	2.29995e-127	1.22164e-120	2.29995e-127	0.001	0.00399507
chr12:113357193_rs10774671	TCONS_00007435_OAS1	43.1852	52.3312	8.08631e-123	2.77847e-116	8.08631e-123	0.001	0.00399507
chr16:2011126_rs758335	TCONS_00012017_TCRBV20S1	-17.8592	-51.0504	1.03044e-120	1.82442e-114	1.03044e-120	0.001	0.00399507
chr19:35506729_rs2290647	TCONS_00015648_GRAMD1A	30.8576	50.7567	3.17704e-120	2.56136e-114	3.17704e-120	0.001	0.00399507
chr7:128614613_rs1874332	TCONS_00029311_IRF5	32.9545	49.2498	1.12145e-117	6.46311e-112	1.12145e-117	0.001	0.00399507
chr1:39507444_rs7519707	TCONS_00000397_NDUFS5	25.536	48.9308	3.95932e-117	3.22258e-111	3.95932e-117	0.001	0.00399507
chr1:39507444_rs7519707	TCONS_00000398_NDUFS5	-25.536	-48.9308	3.95932e-117	3.22258e-111	3.95932e-117	0.001	0.00399507
chr3:53207745_rs3773723	TCONS_00022565_PRKCD	18.9147	47.5825	8.83545e-115	5.53844e-109	8.83545e-115	0.001	0.00399507
chr9:32455320_rs7029002	TCONS_00032205_DDX58	-10.6727	-46.5492	6.08085e-113	3.10435e-106	6.08085e-113	0.001	0.00399507
chr1:79094081_rs1333973	TCONS_00000600_IFI44L	-22.442	-46.2494	2.106e-112	3.03768e-107	2.106e-112	0.001	0.00399507
chr17:7525548_rs1017163	TCONS_00013776_SAT2	-15.2173	-45.3678	8.44655e-111	2.2522e-104	8.44655e-111	0.001	0.00399507
chr1:207941191_rs2724374	TCONS_00001665_CD46	21.6865	45.0791	2.86608e-110	3.71122e-105	2.86608e-110	0.001	0.00399507
chr9:107505262_rs7034016	TCONS_00031818_NIPSNAP3A	-20.8332	-43.1316	1.2876e-106	2.19112e-100	1.2876e-106	0.001	0.00399507
chr9:107505262_rs7034016	TCONS_00031819_NIPSNAP3A	20.8332	43.1316	1.2876e-106	2.19112e-100	1.2876e-106	0.001	0.00399507
chr6:24811680_rs6933295	TCONS_00027823_FAM65B	8.60971	42.9745	2.57176e-106	7.64264e-100	2.57176e-106	0.001	0.00399507
chr9:32455320_rs7029002	TCONS_00032198_DDX58	14.5532	41.1234	1.03849e-102	1.3254e-96	1.03849e-102	0.001	0.00399507
chr7:128597804_rs17166351	TCONS_00029309_IRF5	-23.9891	-40.2384	6.10439e-101	1.51703e-95	6.10439e-101	0.001	0.00399507
chr17:7145981_rs222843	TCONS_00012735_ELP5	-16.7013	-39.5009	1.91821e-99	2.22923e-93	1.91821e-99	0.001	0.00399507
chr5:96249634_rs2549800	TCONS_00025647_ERAP2	33.0111	39.2041	7.79313e-99	1.82311e-93	7.79313e-99	0.001	0.00399507
chr7:128602158_rs6948875	TCONS_00029319_IRF5	-23.3403	-38.9881	2.17194e-98	2.85755e-93	2.17194e-98	0.001	0.00399507
chr12:58112189_rs799265	TCONS_00007188_OS9	5.71579	37.4037	4.572e-95	1.0473e-88	4.572e-95	0.001	0.00399507
chr5:96076487_rs7724759	TCONS_00025642_CAST	-9.64514	-36.373	7.55959e-93	6.31812e-88	7.55959e-93	0.001	0.00399507
chr5:96076487_rs7724759	TCONS_00025624_CAST	9.64514	36.373	7.55959e-93	6.31812e-88	7.55959e-93	0.001	0.00399507
chr7:92769662_rs6974267	TCONS_00029945_SAMD9L	17.9828	35.7657	1.61112e-91	1.38596e-86	1.61112e-91	0.001	0.00399507
chr11:60152584_rs950802	TCONS_00005120_MS4A7	-19.9335	-35.39	1.08947e-90	7.22923e-84	1.08947e-90	0.001	0.00399507
chr5:35874575_rs6897932	TCONS_00025356_IL7R	-10.182	-35.3614	1.26064e-90	9.77267e-86	1.26064e-90	0.001	0.00399507
chr5:35874575_rs6897932	TCONS_00025357_IL7R	10.182	35.3614	1.26064e-90	9.77267e-86	1.26064e-90	0.001	0.00399507
chr1:79094081_rs1333973	TCONS_00000604_IFI44L	10.8873	35.2381	2.36866e-90	1.6358e-85	2.36866e-90	0.001	0.00399507
chr14:96846092_rs2053588	TCONS_00009536_GSKIP	46.3658	35.0057	7.80945e-90	1.04121e-84	7.80945e-90	0.001	0.00399507
chr14:96846092_rs2053588	TCONS_00009537_GSKIP	-46.3658	-35.0057	7.80945e-90	1.04121e-84	7.80945e-90	0.001	0.00399507
chr6:31555392_rs2256974	TCONS_00027044_LST1	-9.58734	-34.4688	1.25661e-88	3.79426e-83	1.25661e-88	0.001	0.00399507
chr11:60152584_rs950802	TCONS_00005121_MS4A7	22.68	34.4654	1.2793e-88	2.12222e-82	1.2793e-88	0.001	0.00399507
chr15:80263406_rs1138357	TCONS_00011036_BCL2A1	13.3831	34.0365	1.20309e-87	2.44658e-81	1.20309e-87	0.001	0.00399507
chr15:80263406_rs1138357	TCONS_00011037_BCL2A1	-13.3831	-34.0365	1.20309e-87	2.44658e-81	1.20309e-87	0.001	0.00399507
chr4:169317279_rs3857035	TCONS_00025115_DDX60L	-18.0952	-33.3993	3.48592e-86	1.42986e-80	3.48592e-86	0.001	0.00399507
chr14:91636532_rs4900072	TCONS_00009497_C14orf159	-33.9139	-32.9281	4.32107e-85	5.22606e-80	4.32107e-85	0.001	0.00399507
chr7:92769662_rs6974267	TCONS_00029941_SAMD9L	-22.5204	-32.7942	8.87852e-85	7.17761e-80	8.87852e-85	0.001	0.00399507
chr8:124154184_rs7004974	TCONS_00030734_WDR67	-42.2555	-32.7815	9.50379e-85	6.81306e-79	9.50379e-85	0.001	0.00399507
chr8:124154184_rs7004974	TCONS_00030733_WDR67	42.2555	32.7815	9.50379e-85	6.81306e-79	9.50379e-85	0.001	0.00399507
chr11:60152584_rs950802	TCONS_00005123_MS4A14	27.2535	32.6878	1.57525e-84	7.46618e-79	1.57525e-84	0.001	0.00399507
chr11:60152584_rs950802	TCONS_00005128_MS4A14	-27.2535	-32.6878	1.57525e-84	7.46618e-79	1.57525e-84	0.001	0.00399507
chr6:32614706_rs17612475	TCONS_00027144_HLA-DQA1	-19.8455	-32.4152	6.88468e-84	1.99883e-78	6.88468e-84	0.001	0.00399507
chr2:202012068_rs13387186	TCONS_00018382_CFLAR	3.82111	31.9372	9.32734e-83	1.65361e-76	9.32734e-83	0.001	0.00399507
chr12:9869271_rs2268146	TCONS_00007662_CLECL1	-13.4504	-31.7726	2.30219e-82	2.63679e-76	2.30219e-82	0.001	0.00399507
chr8:86131463_rs67573812	TCONS_00031122_C8orf59	-19.4992	-31.5454	8.0528e-82	2.56063e-76	8.0528e-82	0.001	0.00399507
chr8:86131463_rs67573812	TCONS_00031123_C8orf59	19.4992	31.5454	8.0528e-82	2.56063e-76	8.0528e-82	0.001	0.00399507
chr6:32630225_rs9274126	TCONS_00028024_HLA-DQB2	-31.2049	-31.196	5.58875e-81	4.68747e-76	5.58875e-81	0.001	0.00399507
chr7:128661132_rs28711211	TCONS_00029310_IRF5	14.2793	31.0981	9.63905e-81	7.34969e-76	9.63905e-81	0.001	0.00399507
chr6:32629110_rs9273608	TCONS_00027137_HLA-DQA1	53.5657	30.8048	4.97074e-80	3.6079e-75	4.97074e-80	0.001	0.00399507
chr20:56180563_rs6025653	TCONS_00020831_ZBP1	16.7195	30.2894	9.09593e-79	2.96185e-72	9.09593e-79	0.001	0.00399507
chr2:223778673_rs10195273	TCONS_00018585_ACSL3	-12.5404	-30.0613	3.32561e-78	2.16116e-72	3.32561e-78	0.001	0.00399507
chr4:119141229_rs78347803	TCONS_00024463_SNHG8	-8.16259	-29.395	1.51922e-76	3.79764e-71	1.51922e-76	0.001	0.00399507
chr4:119141229_rs78347803	TCONS_00024464_SNHG8	8.16259	29.395	1.51922e-76	3.79764e-71	1.51922e-76	0.001	0.00399507
chr1:158319787_rs11264960	TCONS_00001185_CD1E	6.02394	29.1464	6.40926e-76	3.47776e-71	6.40926e-76	0.001	0.00399507
chr10:33188092_rs1342547	TCONS_00004360_ITGB1	8.2071	29.0774	9.57186e-76	6.45588e-70	9.57186e-76	0.001	0.00399507
chr10:33188092_rs1342547	TCONS_00004361_ITGB1	-8.2071	-29.0774	9.57186e-76	6.45588e-70	9.57186e-76	0.001	0.00399507
chr12:131315610_rs4759524	TCONS_00008403_STX2	-8.81435	-29.0735	9.78982e-76	4.21488e-70	9.78982e-76	0.001	0.00399507
chr1:53432786_rs56222568	TCONS_00000520_SCP2	-15.7141	-29.0305	1.25737e-75	6.69513e-71	1.25737e-75	0.001	0.00399507
chr1:53432786_rs56222568	TCONS_00000519_SCP2	15.7141	29.0305	1.25737e-75	6.69513e-71	1.25737e-75	0.001	0.00399507
chr11:77645174_rs147810611	TCONS_00006459_INTS4	4.68609	28.8708	3.18858e-75	1.16735e-69	3.18858e-75	0.001	0.00399507
chr1:197704717_rs17641524	TCONS_00003112_DENND1B	-11.4979	-28.8012	4.78877e-75	2.48034e-70	4.78877e-75	0.001	0.00399507
chr19:51727962_rs3865444	TCONS_00015988_CD33	-13.0318	-28.6253	1.34211e-74	1.71496e-69	1.34211e-74	0.001	0.00399507
chr7:134856623_rs12112778	TCONS_00029369_TMEM140	-29.6244	-27.8197	1.57934e-72	8.21493e-68	1.57934e-72	0.001	0.00399507
chr5:96245910_rs2549799	TCONS_00025657_ERAP2	-19.7996	-27.687	3.48941e-72	8.40755e-68	3.48941e-72	0.001	0.00399507
chr9:130191186_rs13292096	TCONS_00031934_ZNF79	12.4057	27.6772	3.70075e-72	3.91793e-67	3.70075e-72	0.001	0.00399507
chr9:130191186_rs13292096	TCONS_00031935_ZNF79	-12.4057	-27.6772	3.70075e-72	3.91793e-67	3.70075e-72	0.001	0.00399507
chr12:123192848_rs2454705	TCONS_00008283_HCAR1	42.5283	27.1104	1.1221e-70	2.75397e-65	1.1221e-70	0.001	0.00399507
chr4:169314327_rs4692656	TCONS_00025161_DDX60L	8.54171	26.8944	4.1629e-70	2.95975e-65	4.1629e-70	0.001	0.00399507
chr4:169317279_rs3857035	TCONS_00025157_DDX60L	9.68018	26.8202	6.53931e-70	4.52694e-65	6.53931e-70	0.001	0.00399507
chr19:55129476_rs4806791	TCONS_00016050_LILRA2	23.0073	26.4601	5.91188e-69	6.35497e-64	5.91188e-69	0.001	0.00399507
chr19:55129476_rs4806791	TCONS_00016051_LILRA2	-23.0073	-26.4601	5.91188e-69	6.35497e-64	5.91188e-69	0.001	0.00399507
chr22:41608526_rs139446	TCONS_00021597_L3MBTL2	-27.6433	-26.4428	6.57103e-69	2.17798e-63	6.57103e-69	0.001	0.00399507
chr19:48575216_rs62129319	TCONS_00017013_PLA2G4C	-8.90801	-26.2603	2.01918e-68	1.93139e-63	2.01918e-68	0.001	0.00399507
chr6:32559520_rs11751601	TCONS_00027142_HLA-DQA1	-34.7807	-25.6786	7.42828e-67	1.44892e-62	7.42828e-67	0.001	0.00399507
chr10:45479872_rs914703	TCONS_00003696_RASSF4	-8.66284	-25.6777	7.46955e-67	1.81804e-61	7.46955e-67	0.001	0.00399507
chr10:45479872_rs914703	TCONS_00003695_RASSF4	8.66284	25.6777	7.46955e-67	1.81804e-61	7.46955e-67	0.001	0.00399507
chr14:100840596_rs941928	TCONS_00010025_WARS	-4.43074	-25.286	8.67204e-66	2.07858e-61	8.67204e-66	0.001	0.00399507
chr6:129812585_rs2784907	TCONS_00027539_LAMA2	32.4892	25.1299	2.31655e-65	4.11451e-61	2.31655e-65	0.001	0.00399507
chr4:122729685_rs56311153	TCONS_00024474_EXOSC9	-12.5806	-24.7657	2.31973e-64	1.37441e-59	2.31973e-64	0.001	0.00399507
chr4:122729685_rs56311153	TCONS_00024475_EXOSC9	12.5806	24.7657	2.31973e-64	1.37441e-59	2.31973e-64	0.001	0.00399507
chr16:2011126_rs758335	TCONS_00012016_TCRBV20S1	-9.21729	-24.6848	3.87887e-64	1.37353e-58	3.87887e-64	0.001	0.00399507
chr19:9531393_rs1978438	TCONS_00016515_ZNF266	21.842	24.4365	1.88804e-63	1.40199e-58	1.88804e-63	0.001	0.00399507
chr17:7530271_rs858520	TCONS_00013774_SAT2	12.6314	24.4203	2.09449e-63	5.03605e-58	2.09449e-63	0.001	0.00399507
chr19:55824586_rs4806659	TCONS_00017410_TMEM150B	4.81052	23.9956	3.19985e-62	2.0998e-57	3.19985e-62	0.001	0.00399507
chr2:191520845_rs2293765	TCONS_00018278_NAB1	11.0016	23.8753	6.95444e-62	1.39026e-56	6.95444e-62	0.001	0.00399507
chr3:113801965_rs13071100	TCONS_00022702_QTRTD1	15.8341	23.8749	6.9711e-62	1.92726e-56	6.9711e-62	0.001	0.00399507
chr19:57006415_rs17207481	TCONS_00016311_ZNF667-AS1	-37.1914	-23.8603	7.66464e-62	4.8876e-57	7.66464e-62	0.001	0.00399507
chr19:57006415_rs17207481	TCONS_00016310_ZNF667-AS1	37.1914	23.8603	7.66464e-62	4.8876e-57	7.66464e-62	0.001	0.00399507
chr12:113357193_rs10774671	TCONS_00007432_OAS1	-15.2121	-23.7911	1.19854e-61	4.55049e-57	1.19854e-61	0.001	0.00399507
chr9:139371342_rs11999525	TCONS_00032758_SEC16A	-21.0027	-23.7202	1.89778e-61	7.23015e-57	1.89778e-61	0.001	0.00399507
chr2:218931055_rs10932740	TCONS_00018504_RUFY4	17.9422	23.6314	3.37511e-61	6.58653e-56	3.37511e-61	0.001	0.00399507
chr1:79094081_rs1333973	TCONS_00000592_IFI44L	12.7493	23.5726	4.94358e-61	2.1666e-56	4.94358e-61	0.001	0.00399507
chr10:99435006_rs11189321	TCONS_00004581_AVPI1	52.1707	23.3807	1.72452e-60	2.71594e-55	1.72452e-60	0.001	0.00399507
chr10:99435006_rs11189321	TCONS_00004580_AVPI1	-52.1707	-23.3807	1.72452e-60	2.71594e-55	1.72452e-60	0.001	0.00399507
chr6:53377834_rs574389	TCONS_00028251_GCLC	10.1867	23.3687	1.86527e-60	2.44023e-56	1.86527e-60	0.001	0.00399507
chr6:53377834_rs574389	TCONS_00028252_GCLC	-10.1867	-23.3687	1.86527e-60	2.44023e-56	1.86527e-60	0.001	0.00399507
chr12:9869271_rs2268146	TCONS_00007665_CLECL1	8.94684	23.2761	3.41565e-60	1.12848e-55	3.41565e-60	0.001	0.00399507
chr15:89434403_rs7166481	TCONS_00011070_HAPLN3	8.58752	23.0151	1.88919e-59	4.5198e-54	1.88919e-59	0.001	0.00399507
chr13:43469157_rs1359185	TCONS_00008850_EPSTI1	3.75481	22.7507	1.07744e-58	2.65381e-52	1.07744e-58	0.001	0.00399507
chr22:45797954_rs4605479	TCONS_00021637_FAM118A	37.3859	22.7374	1.17578e-58	7.48178e-54	1.17578e-58	0.001	0.00399507
chr22:45797954_rs4605479	TCONS_00021636_FAM118A	-37.3859	-22.7374	1.17578e-58	7.48178e-54	1.17578e-58	0.001	0.00399507
chr17:39942919_rs4796702	TCONS_00014087_JUP	10.7348	22.4349	8.71326e-58	1.21513e-52	8.71326e-58	0.001	0.00399507
chr11:58376276_rs7927966	TCONS_00005083_ZFP91	15.091	22.4118	1.01617e-57	9.49701e-53	1.01617e-57	0.001	0.00399507
chr11:58376276_rs7927966	TCONS_00005085_ZFP91	-15.091	-22.4118	1.01617e-57	9.49701e-53	1.01617e-57	0.001	0.00399507
chr22:41610024_rs139451	TCONS_00021598_L3MBTL2	18.4322	21.9093	2.90569e-56	1.07156e-51	2.90569e-56	0.001	0.00399507
chr22:39355110_rs1977068	TCONS_00021562_APOBEC3G	-35.953	-21.8436	4.51533e-56	1.33276e-51	4.51533e-56	0.001	0.00399507
chr22:39355110_rs1977068	TCONS_00021581_APOBEC3G	35.953	21.8436	4.51533e-56	1.33276e-51	4.51533e-56	0.001	0.00399507
chr6:32626702_rs35779483	TCONS_00028023_HLA-DQB2	77.9868	21.5022	4.49622e-55	4.44826e-51	4.49622e-55	0.001	0.00399507
chr2:202007013_rs56230518	TCONS_00018379_CFLAR	-4.6421	-21.4853	5.03738e-55	8.78467e-50	5.03738e-55	0.001	0.00399507
chr14:20881527_rs1713434	TCONS_00009624_TEP1	27.6678	21.4133	8.19508e-55	1.73088e-50	8.19508e-55	0.001	0.00399507
chr14:20881527_rs1713434	TCONS_00009625_TEP1	-27.6678	-21.4133	8.19508e-55	1.73088e-50	8.19508e-55	0.001	0.00399507
chr7:134856623_rs12112778	TCONS_00029374_TMEM140	19.7421	21.3358	1.38479e-54	2.87673e-50	1.38479e-54	0.001	0.00399507
chr4:76832856_rs2135232	TCONS_00024834_NAAA	-9.41836	-21.1019	6.77414e-54	2.36093e-49	6.77414e-54	0.001	0.00399507
chr19:55830940_rs7508682	TCONS_00017409_TMEM150B	-6.44598	-21.0394	1.03607e-53	3.58716e-49	1.03607e-53	0.001	0.00399507
chr17:25962423_rs8079018	TCONS_00012909_LGALS9	-10.8226	-20.9553	1.83749e-53	1.68587e-48	1.83749e-53	0.001	0.00399507
chr17:25962423_rs8079018	TCONS_00012910_LGALS9	10.8226	20.9553	1.83749e-53	1.68587e-48	1.83749e-53	0.001	0.00399507
chr2:102764609_rs10153578	TCONS_00017920_IL1R1	-15.0134	-20.9377	2.07176e-53	3.08742e-48	2.07176e-53	0.001	0.00399507
chr3:188058716_rs9877579	TCONS_00023111_LPP	-19.9503	-20.8733	3.21512e-53	6.46341e-48	3.21512e-53	0.001	0.00399507
chr14:65375444_rs10142016	TCONS_00009347_CHURC1-FNTB	4.7432	20.8668	3.35983e-53	6.6403e-49	3.35983e-53	0.001	0.00399507
chr14:91631360_rs4904755	TCONS_00009496_C14orf159	24.4714	20.7428	7.8421e-53	1.37687e-48	7.8421e-53	0.001	0.00399507
chr11:500248_rs7113204	TCONS_00005791_RNH1	-7.93518	-20.7131	9.60902e-53	6.13088e-48	9.60902e-53	0.001	0.00399507
chr1:179863922_rs514421	TCONS_00001439_TOR1AIP1	-29.2431	-20.7038	1.02377e-52	3.50323e-48	1.02377e-52	0.001	0.00399507
chr20:56181949_rs4811887	TCONS_00020828_ZBP1	-7.6834	-20.6829	1.18123e-52	6.99533e-47	1.18123e-52	0.001	0.00399507
chr2:202012068_rs13387186	TCONS_00018386_CFLAR	2.30418	20.4687	5.13635e-52	6.19104e-47	5.13635e-52	0.001	0.00399507
chr11:612182_rs1055382	TCONS_00005831_IRF7	5.20813	20.3804	9.42679e-52	5.39241e-47	9.42679e-52	0.001	0.00399507
chr8:27237206_rs1429938	TCONS_00030489_PTK2B	10.9146	20.3523	1.14376e-51	6.69585e-47	1.14376e-51	0.001	0.00399507
chr8:27237206_rs1429938	TCONS_00030486_PTK2B	-10.9146	-20.3523	1.14376e-51	6.69585e-47	1.14376e-51	0.001	0.00399507
chr3:119242930_rs11916272	TCONS_00022719_TIMMDC1	17.7186	20.2651	2.0847e-51	2.66196e-46	2.0847e-51	0.001	0.00399507
chr3:119242930_rs11916272	TCONS_00022716_TIMMDC1	-17.7186	-20.2651	2.0847e-51	2.66196e-46	2.0847e-51	0.001	0.00399507
chr1:173832647_rs16846478	TCONS_00003035_GAS5	16.0532	20.0762	7.68447e-51	2.47355e-46	7.68447e-51	0.001	0.00399507
chr9:102589745_rs1526267	TCONS_00031801_NR4A3	-4.91627	-19.9656	1.65293e-50	4.39502e-46	1.65293e-50	0.001	0.00399507
chr1:197704717_rs17641524	TCONS_00003126_DENND1B	1.04396	19.9455	1.89881e-50	5.91167e-46	1.89881e-50	0.001	0.00399507
chr3:53207745_rs3773723	TCONS_00022557_PRKCD	-13.2151	-19.7078	9.88927e-50	1.17568e-44	9.88927e-50	0.001	0.00399507
chr20:1894315_rs6075339	TCONS_00019803_SIRPA	14.9151	19.3404	1.28244e-48	3.37756e-43	1.28244e-48	0.001	0.00399507
chr20:1894315_rs6075339	TCONS_00019809_SIRPA	-14.9151	-19.3404	1.28244e-48	3.37756e-43	1.28244e-48	0.001	0.00399507
chr6:24807686_rs4504470	TCONS_00027822_FAM65B	-10.8946	-19.3209	1.47028e-48	9.2181e-45	1.47028e-48	0.001	0.00399507
chr10:28812066_rs2998283	TCONS_00004327_WAC-AS1	-16.5999	-19.3012	1.68781e-48	6.23288e-44	1.68781e-48	0.001	0.00399507
chr16:1295818_rs8051930	TCONS_00011180_TPSAB1	13.5777	19.2267	2.84358e-48	6.56693e-43	2.84358e-48	0.001	0.00399507
chr16:1295818_rs8051930	TCONS_00011182_TPSAB1	-13.5777	-19.2267	2.84358e-48	6.56693e-43	2.84358e-48	0.001	0.00399507
chr5:96234212_rs3096168	TCONS_00025658_ERAP2	-17.5223	-19.1703	4.22177e-48	3.73876e-44	4.22177e-48	0.001	0.00399507
chr18:61620766_rs9945924	TCONS_00080276_add_HMSD	-21.3069	-19.1533	4.75615e-48	5.0294e-42	4.75615e-48	0.001	0.00399507
chr11:2152893_rs7129583	TCONS_00005872_IGF2	-15.6402	-19.038	1.06826e-47	2.70554e-43	1.06826e-47	0.001	0.00399507
chr1:85405894_rs12125761	TCONS_00002467_MCOLN2	4.47923	18.9402	2.12394e-47	6.1271e-43	2.12394e-47	0.001	0.00399507
chr9:32436014_rs7022554	TCONS_00032204_DDX58	-4.14904	-18.9291	2.29604e-47	5.71784e-43	2.29604e-47	0.001	0.00399507
chr3:122426474_rs6793057	TCONS_00022747_PARP14	-6.34108	-18.8426	4.2227e-47	4.35797e-42	4.2227e-47	0.001	0.00399507
chr6:129812585_rs2784907	TCONS_00027538_LAMA2	-11.5024	-18.8425	4.22584e-47	2.3629e-43	4.22584e-47	0.001	0.00399507
chr6:160133633_rs76993980	TCONS_00028546_SOD2	-5.7612	-18.7863	6.27922e-47	3.47502e-43	6.27922e-47	0.001	0.00399507
chr6:160133633_rs76993980	TCONS_00028547_SOD2	5.7612	18.7863	6.27922e-47	3.47502e-43	6.27922e-47	0.001	0.00399507
chr20:56180563_rs6025653	TCONS_00020833_ZBP1	-14.6701	-18.7549	7.83268e-47	4.90482e-42	7.83268e-47	0.001	0.00399507
chr14:100840596_rs941928	TCONS_00010037_WARS	-2.35928	-18.6564	1.5701e-46	2.08684e-42	1.5701e-46	0.001	0.00399507
chr6:46657057_rs3799277	TCONS_00028233_PLA2G7	-5.13766	-18.6347	1.82941e-46	9.787e-43	1.82941e-46	0.001	0.00399507
chr20:34284689_rs6060564	TCONS_00020670_CPNE1	-13.1103	-18.6112	2.16068e-46	1.27922e-41	2.16068e-46	0.001	0.00399507
chr2:218928644_rs3181211	TCONS_00019635_CXCR2P1	-3.89362	-18.5963	2.3999e-46	2.00717e-41	2.3999e-46	0.001	0.00399507
chr1:85402242_rs11161489	TCONS_00002471_MCOLN2	3.56354	18.5887	2.53146e-46	7.07004e-42	2.53146e-46	0.001	0.00399507
chr15:89442432_rs2280215	TCONS_00011074_HAPLN3	-10.4496	-18.2288	3.24137e-45	4.25266e-40	3.24137e-45	0.001	0.00399507
chr18:5245861_rs66482644	TCONS_00014785_LINC00667	-19.017	-18.1804	4.57031e-45	9.92351e-40	4.57031e-45	0.001	0.00399507
chr9:134451843_rs7030401	TCONS_00032685_RAPGEF1	-15.376	-18.0374	1.26423e-44	3.0019e-40	1.26423e-44	0.001	0.00399507
chr17:39942919_rs4796702	TCONS_00014089_JUP	-9.64794	-17.9705	2.03459e-44	9.39531e-40	2.03459e-44	0.001	0.00399507
chr3:73102842_rs7628909	TCONS_00022616_PPP4R2	-6.85078	-17.7498	9.82276e-44	8.46633e-39	9.82276e-44	0.001	0.00399507
chr3:73102842_rs7628909	TCONS_00022618_PPP4R2	6.85078	17.7498	9.82276e-44	8.46633e-39	9.82276e-44	0.001	0.00399507
chr5:179264731_rs10277	TCONS_00141538_add_C5orf45	11.5286	17.6513	1.98505e-43	1.44266e-39	1.98505e-43	0.001	0.00399507
chr5:179264731_rs10277	TCONS_00141537_add_C5orf45	-11.5286	-17.6513	1.98505e-43	1.44266e-39	1.98505e-43	0.001	0.00399507
chr19:41929915_rs284657	TCONS_00016889_ATP5SL	-17.1675	-17.5276	4.81204e-43	1.02866e-38	4.81204e-43	0.001	0.00399507
chr19:41929915_rs284657	TCONS_00016890_ATP5SL	17.1675	17.5276	4.81204e-43	1.02866e-38	4.81204e-43	0.001	0.00399507
chr1:89475135_rs10493821	TCONS_00002496_GBP3	-8.73455	-17.366	1.53214e-42	3.49523e-38	1.53214e-42	0.001	0.00399507
chr1:89475135_rs10493821	TCONS_00002502_GBP3	8.73455	17.366	1.53214e-42	3.49523e-38	1.53214e-42	0.001	0.00399507
chr19:51736383_rs33978622	TCONS_00015985_CD33	21.8219	17.3203	2.12622e-42	4.45242e-38	2.12622e-42	0.001	0.00399507
chr1:89652078_rs608339	TCONS_00002526_GBP4	2.414	17.2692	3.06811e-42	6.72324e-38	3.06811e-42	0.001	0.00399507
chr13:43469157_rs1359185	TCONS_00008847_EPSTI1	-3.17593	-17.2367	3.87419e-42	4.77122e-37	3.87419e-42	0.001	0.00399507
chr10:16863161_rs780633	TCONS_00004290_RSU1	3.05486	17.2186	4.41323e-42	1.05028e-37	4.41323e-42	0.001	0.00399507
chr12:10277113_rs11053613	TCONS_00007679_CLEC7A	-8.38939	-17.0929	1.08896e-41	9.0379e-38	1.08896e-41	0.001	0.00399507
chr16:25157759_rs277912	TCONS_00011437_LCMT1	-11.4351	-17.0194	1.84819e-41	1.69255e-36	1.84819e-41	0.001	0.00399507
chr1:79110518_rs4650590	TCONS_00000602_IFI44L	0.726918	16.9988	2.14294e-41	4.43169e-37	2.14294e-41	0.001	0.00399507
chr4:185655171_rs902174	TCONS_00025229_MLF1IP	42.0759	16.9653	2.72773e-41	6.35163e-37	2.72773e-41	0.001	0.00399507
chr4:185655171_rs902174	TCONS_00025230_MLF1IP	-42.0759	-16.9653	2.72773e-41	6.35163e-37	2.72773e-41	0.001	0.00399507
chr15:75130093_rs12898397	TCONS_00010982_ULK3	33.5151	16.9647	2.73976e-41	2.65311e-36	2.73976e-41	0.001	0.00399507
chr12:10277113_rs11053613	TCONS_00007677_CLEC7A	8.3971	16.9347	3.40002e-41	2.79153e-37	3.40002e-41	0.001	0.00399507
chr15:75130093_rs12898397	TCONS_00010981_ULK3	-32.916	-16.924	3.67292e-41	3.47404e-36	3.67292e-41	0.001	0.00399507
chr12:123190700_rs9668547	TCONS_00008284_HCAR1	-11.0803	-16.8644	5.64082e-41	4.59834e-37	5.64082e-41	0.001	0.00399507
chr7:134850725_rs6585	TCONS_00029373_TMEM140	-10.2781	-16.7657	1.14996e-40	1.17267e-36	1.14996e-40	0.001	0.00399507
chr3:113801826_rs13086657	TCONS_00022701_QTRTD1	-12.9599	-16.7291	1.49668e-40	3.9446e-36	1.49668e-40	0.001	0.00399507
chr2:170441001_rs2276611	TCONS_00018195_PPIG	-30.7736	-16.669	2.31105e-40	1.67629e-35	2.31105e-40	0.001	0.00399507
chr2:223756961_rs17176871	TCONS_00018584_ACSL3	6.15528	16.6021	3.74526e-40	2.41711e-35	3.74526e-40	0.001	0.00399507
chr2:170441001_rs2276611	TCONS_00018194_PPIG	29.575	16.589	4.11812e-40	2.61654e-35	4.11812e-40	0.001	0.00399507
chr4:7856527_rs28728216	TCONS_00024664_AFAP1	17.7214	16.5328	6.18086e-40	1.40849e-35	6.18086e-40	0.001	0.00399507
chr7:92775019_rs28662	TCONS_00029948_SAMD9L	3.39693	16.4195	1.40257e-39	1.39218e-35	1.40257e-39	0.001	0.00399507
chr12:123180061_rs1798219	TCONS_00008281_HCAR1	-13.4427	-16.3533	2.26367e-39	1.72653e-35	2.26367e-39	0.001	0.00399507
chr6:129812585_rs2784907	TCONS_00027541_LAMA2	-14.9359	-16.3145	2.99825e-39	1.12043e-35	2.99825e-39	0.001	0.00399507
chr4:7856527_rs28728216	TCONS_00024665_AFAP1	-13.9676	-16.2529	4.68406e-39	9.75668e-35	4.68406e-39	0.001	0.00399507
chr7:26150279_rs11971530	TCONS_00029641_HNRNPA2B1	-2.80072	-16.1356	1.09596e-38	9.67604e-35	1.09596e-38	0.001	0.00399507
chr1:158317878_rs12755572	TCONS_00001197_CD1E	-3.86948	-16.1356	1.0962e-38	1.98586e-34	1.0962e-38	0.001	0.00399507
chr12:102194591_rs12579766	TCONS_00008092_GNPTAB	15.2399	16.0058	2.80994e-38	2.01777e-34	2.80994e-38	0.001	0.00399507
chr12:102194591_rs12579766	TCONS_00008091_GNPTAB	-15.2399	-16.0058	2.80994e-38	2.01777e-34	2.80994e-38	0.001	0.00399507
chr11:502217_rs7944548	TCONS_00005796_RNH1	-3.54165	-16.0056	2.81519e-38	2.65345e-34	2.81519e-38	0.001	0.00399507
chr17:34125123_rs8073456	TCONS_00014012_CCL5	-5.39665	-15.9989	2.95432e-38	9.15557e-34	2.95432e-38	0.001	0.00399507
chr17:34125123_rs8073456	TCONS_00014011_CCL5	5.39665	15.9989	2.95432e-38	9.15557e-34	2.95432e-38	0.001	0.00399507
chr1:236700386_rs2093516	TCONS_00001816_LGALS8	23.0211	15.9494	4.23247e-38	7.35193e-34	4.23247e-38	0.001	0.00399507
chr1:236700386_rs2093516	TCONS_00001817_LGALS8	-23.0211	-15.9494	4.23247e-38	7.35193e-34	4.23247e-38	0.001	0.00399507
chr8:144643603_rs2290414	TCONS_00030793_GSDMD	5.95468	15.9279	4.94491e-38	1.25443e-33	4.94491e-38	0.001	0.00399507
chr12:58112189_rs799265	TCONS_00007182_OS9	-4.88847	-15.8217	1.06964e-37	7.48536e-34	1.06964e-37	0.001	0.00399507
chr5:94040908_rs845725	TCONS_00026247_MCTP1	-8.46114	-15.7997	1.25545e-37	7.57941e-34	1.25545e-37	0.001	0.00399507
chr22:41612541_rs139462	TCONS_00021599_L3MBTL2	8.90884	15.7305	2.07493e-37	2.01005e-33	2.07493e-37	0.001	0.00399507
chr20:391025_rs6139109	TCONS_00019788_RBCK1	3.78221	15.6953	2.6806e-37	3.43649e-33	2.6806e-37	0.001	0.00399507
chr14:74344674_rs7155548	TCONS_00009426_ZNF410	-9.51261	-15.5812	6.14547e-37	6.95727e-33	6.14547e-37	0.001	0.00399507
chr14:74344674_rs7155548	TCONS_00009427_ZNF410	9.51261	15.5812	6.14547e-37	6.95727e-33	6.14547e-37	0.001	0.00399507
chr11:66227184_rs1791687	TCONS_00005346_DPP3	-6.08125	-15.5304	8.89519e-37	7.80747e-33	8.89519e-37	0.001	0.00399507
chr10:43666016_rs2505557	TCONS_00003687_CSGALNACT2	5.56538	15.502	1.09356e-36	1.8768e-32	1.09356e-36	0.001	0.00399507
chr10:43666016_rs2505557	TCONS_00003688_CSGALNACT2	-5.56538	-15.502	1.09356e-36	1.8768e-32	1.09356e-36	0.001	0.00399507
chr17:19294824_rs4924990	TCONS_00013870_BC058012	19.7395	15.4801	1.28211e-36	3.42528e-32	1.28211e-36	0.001	0.00399507
chr17:19294824_rs4924990	TCONS_00013871_BC058012	-19.7395	-15.4801	1.28211e-36	3.42528e-32	1.28211e-36	0.001	0.00399507
chr6:32575544_rs9271061	TCONS_00027994_HLA-DRB5	11.9118	15.4144	2.06845e-36	6.61885e-33	2.06845e-36	0.001	0.00399507
chr10:31333480_rs57718262	TCONS_00004346_ZNF438	-7.99334	-15.3813	2.63328e-36	4.07524e-32	2.63328e-36	0.001	0.00399507
chr19:48600091_rs16981247	TCONS_00017009_PLA2G4C	-5.47716	-15.3739	2.77913e-36	5.01086e-32	2.77913e-36	0.001	0.00399507
chr7:139727135_rs2286196	TCONS_00030207_PARP12	-4.18064	-15.3486	3.33967e-36	2.23865e-32	3.33967e-36	0.001	0.00399507
chr6:29697898_rs116135523	TCONS_00026908_HLA-F	-10.545	-15.2633	6.21787e-36	1.95649e-32	6.21787e-36	0.001	0.00399507
chr10:127738918_rs1710278	TCONS_00004725_ADAM12	-16.5004	-15.2414	7.29104e-36	1.09666e-31	7.29104e-36	0.001	0.00399507
chr7:134856623_rs12112778	TCONS_00030187_C7orf49	-12.4355	-15.2209	8.46568e-36	5.57083e-32	8.46568e-36	0.001	0.00399507
chr4:2815632_rs433030	TCONS_00024108_SH3BP2	-14.5327	-15.0665	2.60841e-35	3.97399e-31	2.60841e-35	0.001	0.00399507
chr1:89652087_rs1142890	TCONS_00002523_GBP4	-3.02841	-15.0369	3.23694e-35	4.89961e-31	3.23694e-35	0.001	0.00399507
chr12:9846521_rs7968401	TCONS_00007664_CLECL1	4.45699	15.0356	3.26795e-35	2.06791e-31	3.26795e-35	0.001	0.00399507
chr2:10127774_rs7596288	TCONS_00017465_GRHL1	18.1079	15.0008	4.2126e-35	1.52105e-30	4.2126e-35	0.001	0.00399507
chr2:10127774_rs7596288	TCONS_00017466_GRHL1	-18.1079	-15.0008	4.2126e-35	1.52105e-30	4.2126e-35	0.001	0.00399507
chr1:15480493_rs7530300	TCONS_00000141_TMEM51	-9.06708	-14.9711	5.2304e-35	7.8318e-31	5.2304e-35	0.001	0.00399507
chr2:218936037_rs4074802	TCONS_00018527_RUFY4	-7.67853	-14.8868	9.67525e-35	3.22363e-30	9.67525e-35	0.001	0.00399507
chr3:188066953_rs6787621	TCONS_00023113_LPP	-18.3511	-14.8785	1.02751e-34	2.03592e-30	1.02751e-34	0.001	0.00399507
chr1:175160334_rs6677931	TCONS_00003045_KIAA0040	5.0283	14.8035	1.7763e-34	2.58173e-30	1.7763e-34	0.001	0.00399507
chr1:175160334_rs6677931	TCONS_00003047_KIAA0040	-5.0283	-14.8035	1.7763e-34	2.58173e-30	1.7763e-34	0.001	0.00399507
chr6:32587409_rs9271385	TCONS_00027996_HLA-DRB5	-5.76045	-14.6821	4.30421e-34	1.2439e-30	4.30421e-34	0.001	0.00399507
chr15:75766672_rs11634863	TCONS_00010995_SIN3A	-5.32891	-14.6195	6.79635e-34	2.82061e-29	6.79635e-34	0.001	0.00399507
chr15:75766672_rs11634863	TCONS_00011000_SIN3A	5.32891	14.6195	6.79635e-34	2.82061e-29	6.79635e-34	0.001	0.00399507
chr3:41281388_rs2953	TCONS_00022354_CTNNB1	3.34941	14.6136	7.09608e-34	1.37829e-29	7.09608e-34	0.001	0.00399507
chr3:41281388_rs2953	TCONS_00022357_CTNNB1	-3.34941	-14.6136	7.09608e-34	1.37829e-29	7.09608e-34	0.001	0.00399507
chr12:109013956_rs73191242	TCONS_00008136_CORO1C	-13.842	-14.5483	1.14278e-33	6.88274e-30	1.14278e-33	0.001	0.00399507
chr22:36601361_rs6000192	TCONS_00021865_APOL4	-26.4339	-14.477	1.92327e-33	1.46514e-29	1.92327e-33	0.001	0.00399507
chr6:3739193_rs4959871	TCONS_00027749_PXDC1	-5.72276	-14.4745	1.95797e-33	5.49644e-30	1.95797e-33	0.001	0.00399507
chr6:3739193_rs4959871	TCONS_00027750_PXDC1	5.72276	14.4745	1.95797e-33	5.49644e-30	1.95797e-33	0.001	0.00399507
chr11:18310449_rs10766467	TCONS_00005986_HPS5	3.54316	14.4625	2.13766e-33	1.65901e-29	2.13766e-33	0.001	0.00399507
chr7:150025734_rs55881542	TCONS_00029433_LRRC61	12.5598	14.3541	4.71376e-33	2.52627e-29	4.71376e-33	0.001	0.00399507
chr9:102589745_rs1526267	TCONS_00031797_NR4A3	4.32726	14.2817	7.99402e-33	1.01016e-28	7.99402e-33	0.001	0.00399507
chr11:491898_rs113813053	TCONS_00005797_RNH1	12.2996	14.1206	2.59042e-32	1.97346e-28	2.59042e-32	0.001	0.00399507
chr3:48478039_rs13069724	TCONS_00022432_ATRIP	-4.04962	-14.0612	3.99381e-32	7.30463e-28	3.99381e-32	0.001	0.00399507
chr3:122440501_rs16833463	TCONS_00022746_PARP14	4.45874	14.0195	5.41481e-32	9.85135e-28	5.41481e-32	0.001	0.00399507
chr10:16863161_rs780633	TCONS_00004287_RSU1	-2.48503	-14.0007	6.21292e-32	6.97445e-28	6.21292e-32	0.001	0.00399507
chr7:32994461_rs10252042	TCONS_00028777_AVL9	-3.45043	-13.9315	1.02873e-31	5.1245e-28	1.02873e-31	0.001	0.00399507
chr7:32994461_rs10252042	TCONS_00028779_AVL9	3.45043	13.9315	1.02873e-31	5.1245e-28	1.02873e-31	0.001	0.00399507
chr3:53208917_rs3821689	TCONS_00022554_PRKCD	-4.24641	-13.8921	1.37147e-31	2.35827e-27	1.37147e-31	0.001	0.00399507
chr19:9541406_rs58359623	TCONS_00016512_ZNF266	-11.4754	-13.876	1.54236e-31	2.49764e-27	1.54236e-31	0.001	0.00399507
chr6:116783619_rs117361304	TCONS_00027498_FAM26F	-10.7292	-13.8741	1.56387e-31	3.96275e-28	1.56387e-31	0.001	0.00399507
chr12:121829972_rs7976840	TCONS_00007480_RNF34	-7.88677	-13.8351	2.07853e-31	1.12559e-27	2.07853e-31	0.001	0.00399507
chr12:121829972_rs7976840	TCONS_00007478_RNF34	7.88677	13.8351	2.07853e-31	1.12559e-27	2.07853e-31	0.001	0.00399507
chr2:223778673_rs10195273	TCONS_00018587_ACSL3	6.31855	13.8048	2.59233e-31	6.32368e-27	2.59233e-31	0.001	0.00399507
chr4:76832856_rs2135232	TCONS_00024847_NAAA	7.94264	13.7495	3.87743e-31	5.012e-27	3.87743e-31	0.001	0.00399507
chr14:24900209_rs1956905	TCONS_00009197_KHNYN	-5.18198	-13.7355	4.29518e-31	3.12716e-27	4.29518e-31	0.001	0.00399507
chr14:24900209_rs1956905	TCONS_00009199_KHNYN	5.18198	13.7355	4.29518e-31	3.12716e-27	4.29518e-31	0.001	0.00399507
chr6:32626702_rs35779483	TCONS_00028019_HLA-DQB2	-50.3633	-13.6737	6.73794e-31	1.65351e-27	6.73794e-31	0.001	0.00399507
chr19:39735644_rs28416813	TCONS_00015716_IFNL2	4.01067	13.626	9.5386e-31	1.4241e-26	9.5386e-31	0.001	0.00399507
chr19:39735644_rs28416813	TCONS_00015721_IFNL2	-4.01067	-13.626	9.5386e-31	1.4241e-26	9.5386e-31	0.001	0.00399507
chr9:15302613_rs677622	TCONS_00032115_TTC39B	12.672	13.571	1.42391e-30	1.74322e-26	1.42391e-30	0.001	0.00399507
chr9:15302613_rs677622	TCONS_00032117_TTC39B	-12.672	-13.571	1.42391e-30	1.74322e-26	1.42391e-30	0.001	0.00399507
chr19:14879034_rs9305048	TCONS_00016657_EMR2	-18.9207	-13.5038	2.3232e-30	3.31503e-26	2.3232e-30	0.001	0.00399507
chr7:115541780_rs10242082	TCONS_00030117_TFEC	4.18034	13.4454	3.55473e-30	1.68446e-26	3.55473e-30	0.001	0.00399507
chr6:31480578_rs142982592	TCONS_00148348_add_ATP6V1G2-DDX39B	19.3981	13.3929	5.20832e-30	1.22976e-26	5.20832e-30	0.001	0.00399507
chr6:31480578_rs142982592	TCONS_00148349_add_ATP6V1G2-DDX39B	-19.3981	-13.3929	5.20832e-30	1.22976e-26	5.20832e-30	0.001	0.00399507
chr17:78076005_rs8077055	TCONS_00013525_GAA	-12.3552	-13.3858	5.48615e-30	6.65289e-26	5.48615e-30	0.001	0.00399507
chr17:78076005_rs8077055	TCONS_00013526_GAA	12.3552	13.3858	5.48615e-30	6.65289e-26	5.48615e-30	0.001	0.00399507
chr7:105917301_rs78411774	TCONS_00030059_NAMPT	3.32409	13.3797	5.73544e-30	2.70255e-26	5.73544e-30	0.001	0.00399507
chr7:105917301_rs78411774	TCONS_00030060_NAMPT	-3.32409	-13.3797	5.73544e-30	2.70255e-26	5.73544e-30	0.001	0.00399507
chr17:46183160_rs9910516	TCONS_00013254_SNX11	-8.21839	-13.3752	5.92669e-30	7.12516e-26	5.92669e-30	0.001	0.00399507
chr2:71036482_rs2287101	TCONS_00019092_CLEC4F	-19.5468	-13.3743	5.96685e-30	1.25723e-25	5.96685e-30	0.001	0.00399507
chr17:18237116_rs12451698	TCONS_00012868_SMCR8	10.1002	13.3324	8.09011e-30	9.41756e-26	8.09011e-30	0.001	0.00399507
chr17:18237116_rs12451698	TCONS_00012869_SMCR8	-10.1002	-13.3324	8.09011e-30	9.41756e-26	8.09011e-30	0.001	0.00399507
chr11:62580310_rs75266488	TCONS_00006286_SNHG1	-8.05981	-13.2648	1.32292e-29	8.14317e-26	1.32292e-29	0.001	0.00399507
chr11:62580310_rs75266488	TCONS_00006287_SNHG1	8.05981	13.2648	1.32292e-29	8.14317e-26	1.32292e-29	0.001	0.00399507
chr2:218936037_rs4074802	TCONS_00018503_RUFY4	-4.9544	-13.2589	1.38154e-29	2.87399e-25	1.38154e-29	0.001	0.00399507
chr6:116783619_rs117361304	TCONS_00027497_FAM26F	12.3331	13.2565	1.40581e-29	3.27326e-26	1.40581e-29	0.001	0.00399507
chr2:196984231_rs16845143	TCONS_00019549_STK17B	9.49533	13.2498	1.47586e-29	3.04701e-25	1.47586e-29	0.001	0.00399507
chr2:196984231_rs16845143	TCONS_00019551_STK17B	-9.49533	-13.2498	1.47586e-29	3.04701e-25	1.47586e-29	0.001	0.00399507
chr17:35958676_rs12601864	TCONS_00014042_SYNRG	23.1246	13.1805	2.44307e-29	2.34322e-25	2.44307e-29	0.001	0.00399507
chr9:114434070_rs7045665	TCONS_00031854_DNAJC25-GNG10	4.28857	13.1583	2.86993e-29	3.48013e-25	2.86993e-29	0.001	0.00399507
chr9:114434070_rs7045665	TCONS_00031853_DNAJC25-GNG10	-4.28857	-13.1583	2.86993e-29	3.48013e-25	2.86993e-29	0.001	0.00399507
chr14:74030518_rs2336136	TCONS_00009903_HEATR4	-18.2894	-13.1357	3.38345e-29	2.21062e-25	3.38345e-29	0.001	0.00399507
chr1:89883969_rs6673515	TCONS_00000640_GBP1P1	-9.06313	-13.1188	3.82509e-29	4.17096e-25	3.82509e-29	0.001	0.00399507
chr2:97161749_rs1585272	TCONS_00019228_NEURL3	5.62321	13.0311	7.23397e-29	1.39839e-24	7.23397e-29	0.001	0.00399507
chr3:119242930_rs11916272	TCONS_00023725_CD80	-4.38613	-13.0161	8.0655e-29	1.25823e-24	8.0655e-29	0.001	0.00399507
chr3:119242930_rs11916272	TCONS_00023721_CD80	4.38613	13.0161	8.0655e-29	1.25823e-24	8.0655e-29	0.001	0.00399507
chr19:9533805_rs6512121	TCONS_00016514_ZNF266	-9.88544	-12.9902	9.72968e-29	1.15235e-24	9.72968e-29	0.001	0.00399507
chr6:31540784_rs1041981	TCONS_00027039_LTA	9.48858	12.9652	1.16711e-28	2.6283e-25	1.16711e-28	0.001	0.00399507
chr5:100158868_rs2725117	TCONS_00026267_ST8SIA4	-1.71316	-12.932	1.48442e-28	7.73891e-25	1.48442e-28	0.001	0.00399507
chr8:622078_rs10103269	TCONS_00030869_ERICH1	-5.50258	-12.9011	1.85827e-28	1.82112e-24	1.85827e-28	0.001	0.00399507
chr8:622078_rs10103269	TCONS_00030867_ERICH1	5.50258	12.9011	1.85827e-28	1.82112e-24	1.85827e-28	0.001	0.00399507
chr9:79320640_rs512110	TCONS_00175027_add_PRUNE2	9.41537	12.8753	2.24115e-28	2.66078e-24	2.24115e-28	0.001	0.00399507
chr6:29700763_rs142739454	TCONS_00026925_HLA-F	9.80332	12.8284	3.14879e-28	6.96832e-25	3.14879e-28	0.001	0.00399507
chr5:180230235_rs3806862	TCONS_00026700_MGAT1	1.30408	12.8091	3.61964e-28	1.87684e-24	3.61964e-28	0.001	0.00399507
chr2:102771855_rs871659	TCONS_00017922_IL1R1	15.0352	12.7824	4.39449e-28	8.35697e-24	4.39449e-28	0.001	0.00399507
chr15:50776525_rs10220843	TCONS_00010305_USP8	-11.4663	-12.7489	5.60322e-28	6.60559e-24	5.60322e-28	0.001	0.00399507
chr15:50776525_rs10220843	TCONS_00010308_USP8	11.4663	12.7489	5.60322e-28	6.60559e-24	5.60322e-28	0.001	0.00399507
chr7:76127854_rs118024038	TCONS_00029068_DTX2	16.9623	12.727	6.56465e-28	2.77033e-24	6.56465e-28	0.001	0.00399507
chr7:76127854_rs118024038	TCONS_00029069_DTX2	-16.9623	-12.727	6.56465e-28	2.77033e-24	6.56465e-28	0.001	0.00399507
chr2:218931055_rs10932740	TCONS_00018533_RUFY4	-4.59877	-12.6524	1.12677e-27	2.06608e-23	1.12677e-27	0.001	0.00399507
chr20:62211185_rs6090461	TCONS_00020862_HELZ2	-9.48021	-12.6005	1.64009e-27	1.59896e-23	1.64009e-27	0.001	0.00399507
chr14:74030518_rs2336136	TCONS_00009421_ACOT2	-9.43736	-12.5873	1.80474e-27	1.09373e-23	1.80474e-27	0.001	0.00399507
chr14:74030518_rs2336136	TCONS_00009422_ACOT2	9.43736	12.5873	1.80474e-27	1.09373e-23	1.80474e-27	0.001	0.00399507
chr15:65198309_rs1684051	TCONS_00055095_add_ANKDD1A	2.84313	12.5785	1.92295e-27	2.16049e-23	1.92295e-27	0.001	0.00399507
chr12:104348430_rs2576975	TCONS_00042125_add_C12orf73	14.6891	12.5371	2.59362e-27	1.16875e-23	2.59362e-27	0.001	0.00399507
chr11:60046307_rs10897023	TCONS_00005116_MS4A4A	-6.57277	-12.5245	2.84212e-27	1.43415e-23	2.84212e-27	0.001	0.00399507
chr11:60046307_rs10897023	TCONS_00005113_MS4A4A	6.57277	12.5245	2.84212e-27	1.43415e-23	2.84212e-27	0.001	0.00399507
chr6:129812585_rs2784907	TCONS_00027540_LAMA2	-6.05097	-12.5136	3.0745e-27	6.41641e-24	3.0745e-27	0.001	0.00399507
chr6:33055355_rs115561363	TCONS_00028074_HLA-DPA1	-32.2992	-12.509	3.17863e-27	6.6264e-24	3.17863e-27	0.001	0.00399507
chr6:33055355_rs115561363	TCONS_00028070_HLA-DPA1	32.2992	12.509	3.17863e-27	6.6264e-24	3.17863e-27	0.001	0.00399507
chr1:207943158_rs2724360	TCONS_00001669_CD46	-9.25819	-12.4894	3.66108e-27	3.23644e-23	3.66108e-27	0.001	0.00399507
chr20:34467215_rs7271036	TCONS_00020673_CPNE1	8.52313	12.3845	7.81142e-27	7.52541e-23	7.81142e-27	0.001	0.00399507
chr11:60152584_rs950802	TCONS_00005126_MS4A7	-2.74656	-12.3231	1.21668e-26	5.97584e-23	1.21668e-26	0.001	0.00399507
chr9:21238127_rs10964930	TCONS_00032143_IFNA14	-3.49928	-12.3079	1.35783e-26	1.51231e-22	1.35783e-26	0.001	0.00399507
chr11:129993432_rs3886745	TCONS_00005754_APLP2	-7.99795	-12.2961	1.47788e-26	7.22665e-23	1.47788e-26	0.001	0.00399507
chr9:21203008_rs10811502	TCONS_00032135_IFNA14	8.93611	12.2827	1.62792e-26	1.8022e-22	1.62792e-26	0.001	0.00399507
chr19:54779455_rs444004	TCONS_00017364_LILRA6	-33.4257	-12.2684	1.80441e-26	1.88402e-22	1.80441e-26	0.001	0.00399507
chr17:16351745_rs35774281	TCONS_00012853_TRPV2	-6.87626	-12.2654	1.84435e-26	1.32445e-22	1.84435e-26	0.001	0.00399507
chr2:223406443_rs36105948	TCONS_00018581_SGPP2	4.04292	12.2573	1.95474e-26	3.28312e-22	1.95474e-26	0.001	0.00399507
chr20:16710791_rs2073055	TCONS_00019870_SNRPB2	11.3274	12.231	2.36319e-26	1.89069e-22	2.36319e-26	0.001	0.00399507
chr20:16710791_rs2073055	TCONS_00019871_SNRPB2	-11.3274	-12.231	2.36319e-26	1.89069e-22	2.36319e-26	0.001	0.00399507
chr2:202013956_rs12104442	TCONS_00018384_CFLAR	-2.6267	-12.1998	2.95831e-26	4.90902e-22	2.95831e-26	0.001	0.00399507
chr14:94578162_rs2239644	TCONS_00009518_IFI27	-3.90068	-12.163	3.8565e-26	2.18506e-22	3.8565e-26	0.001	0.00399507
chr2:175347650_rs12614738	TCONS_00019468_GPR155	9.75692	12.12	5.25476e-26	8.44502e-22	5.25476e-26	0.001	0.00399507
chr8:144643169_rs1545536	TCONS_00030787_GSDMD	-10.3112	-12.1144	5.46932e-26	4.0222e-22	5.46932e-26	0.001	0.00399507
chr17:34434892_rs12453700	TCONS_00013033_CCL4	4.86488	12.1144	5.46938e-26	3.74997e-22	5.46938e-26	0.001	0.00399507
chr10:127738918_rs1710278	TCONS_00004722_ADAM12	10.2053	12.1135	5.50592e-26	3.12976e-22	5.50592e-26	0.001	0.00399507
chr17:34434892_rs12453700	TCONS_00013032_CCL4	-4.85525	-12.0879	6.61897e-26	4.44957e-22	6.61897e-26	0.001	0.00399507
chr1:207941191_rs2724374	TCONS_00001664_CD46	-10.8208	-12.0778	7.11335e-26	5.61718e-22	7.11335e-26	0.001	0.00399507
chr20:3514481_rs151515	TCONS_00019840_ATRN	7.80666	12.0421	9.19847e-26	6.30577e-22	9.19847e-26	0.001	0.00399507
chr9:134456310_rs34466733	TCONS_00032687_RAPGEF1	15.3465	12.0178	1.0954e-25	1.10955e-21	1.0954e-25	0.001	0.00399507
chr2:99184019_rs3754877	TCONS_00017852_UNC50	-10.1053	-11.9962	1.27846e-25	2.00356e-21	1.27846e-25	0.001	0.00399507
chr2:99184019_rs3754877	TCONS_00017851_UNC50	10.1053	11.9962	1.27846e-25	2.00356e-21	1.27846e-25	0.001	0.00399507
chr16:84209498_rs4782899	TCONS_00067472_add_TAF1C	-9.70854	-11.9647	1.60345e-25	6.26241e-21	1.60345e-25	0.001	0.00399507
chr17:35932917_rs11870876	TCONS_00014041_SYNRG	-16.0054	-11.9412	1.89814e-25	1.2416e-21	1.89814e-25	0.001	0.00399507
chr10:100192903_rs11593280	TCONS_00004605_HPS1	2.54193	11.8628	3.33041e-25	1.83848e-21	3.33041e-25	0.001	0.00399507
chr19:54779455_rs444004	TCONS_00017362_LILRA6	31.9365	11.8278	4.27946e-25	4.01848e-21	4.27946e-25	0.001	0.00399507
chr12:121669611_rs1169718	TCONS_00008234_CAMKK2	-7.84388	-11.8251	4.36159e-25	1.7873e-21	4.36159e-25	0.001	0.00399507
chr6:116755382_rs488217	TCONS_00027492_DSE	1.42054	11.8035	5.09227e-25	9.02972e-22	5.09227e-25	0.001	0.00399507
chr3:37158798_rs9861967	TCONS_00023279_LRRFIP2	-4.98201	-11.7731	6.32835e-25	6.66194e-21	6.32835e-25	0.001	0.00399507
chr9:88714489_rs191559811	TCONS_00032360_GOLM1	20.4161	11.7655	6.68242e-25	5.97453e-21	6.68242e-25	0.001	0.00399507
chr9:88714489_rs191559811	TCONS_00032357_GOLM1	-20.4161	-11.7655	6.68242e-25	5.97453e-21	6.68242e-25	0.001	0.00399507
chr18:2979173_rs2276376	TCONS_00014934_LPIN2	6.55156	11.7364	8.23237e-25	1.69931e-20	8.23237e-25	0.001	0.00399507
chr7:38220597_rs9639788	TCONS_00028815_STARD3NL	6.81481	11.6213	1.87254e-24	6.6691e-21	1.87254e-24	0.001	0.00399507
chr8:90976405_rs6990969	TCONS_00031135_NBN	-2.22973	-11.6015	2.15706e-24	1.43132e-20	2.15706e-24	0.001	0.00399507
chr10:82214065_rs116857892	TCONS_00003940_TSPAN14	-7.91627	-11.5437	3.25758e-24	1.65653e-20	3.25758e-24	0.001	0.00399507
chr2:218928710_rs3181210	TCONS_00019629_CXCR2P1	4.79056	11.5313	3.55948e-24	4.79845e-20	3.55948e-24	0.001	0.00399507
chr17:76992511_rs4789904	TCONS_00014587_CANT1	12.0312	11.5295	3.60488e-24	2.12659e-20	3.60488e-24	0.001	0.00399507
chr3:160939141_rs28384382	TCONS_00022968_NMD3	-8.24374	-11.4137	8.2203e-24	7.90533e-20	8.2203e-24	0.001	0.00399507
chr3:160939141_rs28384382	TCONS_00022971_NMD3	8.24374	11.4137	8.2203e-24	7.90533e-20	8.2203e-24	0.001	0.00399507
chr2:97000396_rs772173	TCONS_00017830_ITPRIPL1	14.7228	11.3834	1.01894e-23	1.30902e-19	1.01894e-23	0.001	0.00399507
chr17:75183461_rs73378313	TCONS_00013480_SEC14L1	23.7043	11.3802	1.04307e-23	5.86548e-20	1.04307e-23	0.001	0.00399507
chr17:38119708_rs56396280	TCONS_00013092_GSDMA	35.2731	11.3617	1.1888e-23	6.67419e-20	1.1888e-23	0.001	0.00399507
chr17:38119708_rs56396280	TCONS_00013093_GSDMA	-35.2731	-11.3617	1.1888e-23	6.67419e-20	1.1888e-23	0.001	0.00399507
chr12:48289355_rs3890734	TCONS_00007775_VDR	7.51934	11.3429	1.35908e-23	5.40177e-20	1.35908e-23	0.001	0.00399507
chr12:48289355_rs3890734	TCONS_00007776_VDR	-7.51934	-11.3429	1.35908e-23	5.40177e-20	1.35908e-23	0.001	0.00399507
chr7:102349930_rs7809082	TCONS_00030026_RASA4	7.87531	11.3177	1.62518e-23	5.5467e-20	1.62518e-23	0.001	0.00399507
chr2:175347650_rs12614738	TCONS_00019467_GPR155	-7.90119	-11.3163	1.64103e-23	2.07757e-19	1.64103e-23	0.001	0.00399507
chr6:31471762_rs181230783	TCONS_00027033_MICB	4.29554	11.3131	1.67963e-23	2.53425e-20	1.67963e-23	0.001	0.00399507
chr7:30608652_rs38484	TCONS_00158245_add_LOC401320	7.96667	11.2968	1.88454e-23	6.40906e-20	1.88454e-23	0.001	0.00399507
chr11:2152893_rs7129583	TCONS_00005873_IGF2	14.2775	11.2893	1.98731e-23	8.34088e-20	1.98731e-23	0.001	0.00399507
chr1:213030534_rs2279692	TCONS_00014203_add_FLVCR1-AS1	29.7186	11.2396	2.82696e-23	1.94054e-19	2.82696e-23	0.001	0.00399507
chr6:163814557_rs4709715	TCONS_00151027_add_CAHM	3.0338	11.2383	2.854e-23	4.18649e-20	2.854e-23	0.001	0.00399507
chr17:16342833_rs11871958	TCONS_00012856_C17orf76-AS1	10.8107	11.2156	3.35215e-23	1.798e-19	3.35215e-23	0.001	0.00399507
chr1:85394498_rs11161488	TCONS_00002468_MCOLN2	-6.54157	-11.175	4.468e-23	3.0233e-19	4.468e-23	0.001	0.00399507
chr5:340047_rs2672749	TCONS_00025293_AHRR	9.3178	11.167	4.7262e-23	2.04203e-19	4.7262e-23	0.001	0.00399507
chr20:1895630_rs111980944	TCONS_00020282_SIRPB1	-24.182	-11.1328	6.02022e-23	3.50059e-19	6.02022e-23	0.001	0.00399507
chr20:1895630_rs111980944	TCONS_00020272_SIRPB1	24.182	11.1328	6.02022e-23	3.50059e-19	6.02022e-23	0.001	0.00399507
chr1:151746524_rs1623480	TCONS_00002755_TDRKH	2.19973	11.0961	7.80284e-23	5.20871e-19	7.80284e-23	0.001	0.00399507
chr5:180231245_rs34060154	TCONS_00026696_MGAT1	-9.70839	-11.0943	7.90309e-23	3.39545e-19	7.90309e-23	0.001	0.00399507
chr3:71829467_rs7634474	TCONS_00023636_EIF4E3	-6.37548	-11.0643	9.76495e-23	7.99668e-19	9.76495e-23	0.001	0.00399507
chr4:78089099_rs4150103	TCONS_00024306_CCNG2	4.42333	11.0507	1.07506e-22	6.15086e-19	1.07506e-22	0.001	0.00399507
chr4:78089099_rs4150103	TCONS_00024310_CCNG2	-4.42333	-11.0507	1.07506e-22	6.15086e-19	1.07506e-22	0.001	0.00399507
chr4:37953902_rs4832972	TCONS_00024213_TBC1D1	1.22158	10.9997	1.54047e-22	8.65579e-19	1.54047e-22	0.001	0.00399507
chr10:129845903_rs7912703	TCONS_00004152_PTPRE	-4.66879	-10.9804	1.76458e-22	8.19491e-19	1.76458e-22	0.001	0.00399507
chr17:75183461_rs73378313	TCONS_00013493_SEC14L1	-23.1135	-10.9507	2.17471e-22	1.07166e-18	2.17471e-22	0.001	0.00399507
chr4:169343044_rs61740705	TCONS_00025171_DDX60L	-2.4099	-10.927	2.57083e-22	1.4017e-18	2.57083e-22	0.001	0.00399507
chr13:114529383_rs12868549	TCONS_00045922_add_GAS6-AS1	-8.4441	-10.9158	2.78011e-22	3.24533e-18	2.78011e-22	0.001	0.00399507
chr4:7849554_rs28612887	TCONS_00024671_AFAP1	-3.46215	-10.9086	2.92558e-22	1.58218e-18	2.92558e-22	0.001	0.00399507
chr3:71829467_rs7634474	TCONS_00023643_EIF4E3	6.04112	10.877	3.6518e-22	2.85813e-18	3.6518e-22	0.001	0.00399507
chr1:213030534_rs2279692	TCONS_00014206_add_FLVCR1-AS1	-29.4317	-10.8706	3.82111e-22	2.42975e-18	3.82111e-22	0.001	0.00399507
chr3:52874288_rs6445538	TCONS_00023504_TMEM110-MUSTN1	-4.40815	-10.8599	4.11885e-22	3.20549e-18	4.11885e-22	0.001	0.00399507
chr3:52874288_rs6445538	TCONS_00023563_TMEM110-MUSTN1	4.40815	10.8599	4.11885e-22	3.20549e-18	4.11885e-22	0.001	0.00399507
chr17:4687041_rs11651939	TCONS_00013714_VMO1	-25.2804	-10.8349	4.91036e-22	2.37937e-18	4.91036e-22	0.001	0.00399507
chr17:4687041_rs11651939	TCONS_00013713_VMO1	25.2804	10.8349	4.91036e-22	2.37937e-18	4.91036e-22	0.001	0.00399507
chr9:139294637_rs191129675	TCONS_00032745_CARD9	-21.0112	-10.8148	5.65143e-22	3.63366e-18	5.65143e-22	0.001	0.00399507
chr10:76970613_rs11543	TCONS_00003881_VDAC2	2.31003	10.773	7.57858e-22	3.45662e-18	7.57858e-22	0.001	0.00399507
chr10:76970613_rs11543	TCONS_00003878_VDAC2	-2.31003	-10.773	7.57858e-22	3.45662e-18	7.57858e-22	0.001	0.00399507
chr1:158303505_rs1321645	TCONS_00001180_CD1E	-2.37871	-10.7384	9.65888e-22	5.93327e-18	9.65888e-22	0.001	0.00399507
chr8:130925116_rs837080	TCONS_00031292_FAM49B	-4.24431	-10.7325	1.00614e-21	4.45872e-18	1.00614e-21	0.001	0.00399507
chr6:46618289_rs2396690	TCONS_00028236_PLA2G7	3.61328	10.7239	1.06889e-21	1.38185e-18	1.06889e-21	0.001	0.00399507
chr16:15820863_rs16967494	TCONS_00011365_NDE1	3.82178	10.7108	1.17123e-21	2.47851e-17	1.17123e-21	0.001	0.00399507
chr17:16351816_rs11871963	TCONS_00012858_C17orf76-AS1	-11.1812	-10.7053	1.21706e-21	5.73019e-18	1.21706e-21	0.001	0.00399507
chr3:119228607_rs2030816	TCONS_00022712_POGLUT1	3.18242	10.6977	1.28357e-21	9.66217e-18	1.28357e-21	0.001	0.00399507
chr17:33584041_rs11080332	TCONS_00012993_SLFN5	-9.95062	-10.6787	1.46592e-21	6.83265e-18	1.46592e-21	0.001	0.00399507
chr17:33584041_rs11080332	TCONS_00012989_SLFN5	9.95062	10.6787	1.46592e-21	6.83265e-18	1.46592e-21	0.001	0.00399507
chr9:92037236_rs10908914	TCONS_00032388_SEMA4D	-4.43947	-10.6433	1.87827e-21	1.1525e-17	1.87827e-21	0.001	0.00399507
chr9:92037236_rs10908914	TCONS_00032386_SEMA4D	4.43947	10.6433	1.87827e-21	1.1525e-17	1.87827e-21	0.001	0.00399507
chr8:11708355_rs2272766	TCONS_00030893_CTSB	3.47754	10.5927	2.67427e-21	1.13535e-17	2.67427e-21	0.001	0.00399507
chr8:11708355_rs2272766	TCONS_00030892_CTSB	-3.47754	-10.5927	2.67427e-21	1.13535e-17	2.67427e-21	0.001	0.00399507
chr14:65400069_rs11158569	TCONS_00009345_CHURC1-FNTB	-4.62127	-10.5878	2.76585e-21	1.09669e-17	2.76585e-21	0.001	0.00399507
chr20:34555878_rs6060726	TCONS_00020694_SCAND1	-11.8517	-10.5818	2.88447e-21	1.49087e-17	2.88447e-21	0.001	0.00399507
chr20:34555878_rs6060726	TCONS_00020693_SCAND1	11.8517	10.5818	2.88447e-21	1.49087e-17	2.88447e-21	0.001	0.00399507
chr19:3545850_rs10424296	TCONS_00016412_MFSD12	4.15941	10.5788	2.94646e-21	1.9369e-17	2.94646e-21	0.001	0.00399507
chr11:77813941_rs640016	TCONS_00006462_ALG8	11.48	10.5701	3.12997e-21	1.03072e-17	3.12997e-21	0.001	0.00399507
chr11:77813941_rs640016	TCONS_00006463_ALG8	-11.48	-10.5701	3.12997e-21	1.03072e-17	3.12997e-21	0.001	0.00399507
chr17:7161628_rs2521989	TCONS_00012736_ELP5	-13.7114	-10.5661	3.21758e-21	1.46352e-17	3.21758e-21	0.001	0.00399507
chr1:46013208_rs2991972	TCONS_00000483_AKR1A1	3.13484	10.5489	3.62709e-21	2.15374e-17	3.62709e-21	0.001	0.00399507
chr10:46136306_rs4949013	TCONS_00003710_FAM21C	18.9176	10.3748	1.21628e-20	5.23533e-17	1.21628e-20	0.001	0.00399507
chr11:35246865_rs2421825	TCONS_00004980_CD44	-1.39297	-10.3686	1.27046e-20	3.91921e-17	1.27046e-20	0.001	0.00399507
chr6:31052632_rs115917409	TCONS_00027001_HLA-L	-16.2686	-10.3496	1.44844e-20	1.79007e-17	1.44844e-20	0.001	0.00399507
chr6:26410418_rs57275245	TCONS_00026881_BTN3A1	8.84454	10.3304	1.65514e-20	2.0415e-17	1.65514e-20	0.001	0.00399507
chr6:26410418_rs57275245	TCONS_00026886_BTN3A1	-8.84454	-10.3304	1.65514e-20	2.0415e-17	1.65514e-20	0.001	0.00399507
chr2:113877713_rs878972	TCONS_00017986_IL1RN	-2.46647	-10.3122	1.87639e-20	1.51671e-16	1.87639e-20	0.001	0.00399507
chr2:113877713_rs878972	TCONS_00017981_IL1RN	2.46647	10.3122	1.87639e-20	1.51671e-16	1.87639e-20	0.001	0.00399507
chr22:24341250_rs140291	TCONS_00021335_GSTT2	23.44	10.3032	1.99822e-20	8.8108e-17	1.99822e-20	0.001	0.00399507
chr22:24341250_rs140291	TCONS_00021740_GSTT2	-23.44	-10.3032	1.99822e-20	8.8108e-17	1.99822e-20	0.001	0.00399507
chr22:36599544_rs4820221	TCONS_00021868_APOL4	-14.6876	-10.295	2.11484e-20	9.31234e-17	2.11484e-20	0.001	0.00399507
chr8:145603114_rs6599528	TCONS_00031422_CPSF1	-6.7229	-10.2801	2.34378e-20	9.22836e-17	2.34378e-20	0.001	0.00399507
chr8:145603114_rs6599528	TCONS_00031423_CPSF1	6.7229	10.2801	2.34378e-20	9.22836e-17	2.34378e-20	0.001	0.00399507
chr5:180231245_rs34060154	TCONS_00026693_MGAT1	5.89897	10.1902	4.35883e-20	1.58391e-16	4.35883e-20	0.001	0.00399507
chr13:50539941_rs61961261	TCONS_00008634_TRIM13	-13.7811	-10.1813	4.63439e-20	3.80496e-16	4.63439e-20	0.001	0.00399507
chr13:50539941_rs61961261	TCONS_00008635_TRIM13	13.7811	10.1813	4.63439e-20	3.80496e-16	4.63439e-20	0.001	0.00399507
chr16:11444716_rs2032932	TCONS_00011344_RMI2	-4.91977	-10.1796	4.68995e-20	7.90828e-16	4.68995e-20	0.001	0.00399507
chr4:7939008_rs62290601	TCONS_00024668_AFAP1	-5.70275	-10.1645	5.20244e-20	2.1656e-16	5.20244e-20	0.001	0.00399507
chr11:108637788_rs2726888	TCONS_00005622_DDX10	-10.3552	-10.1451	5.94554e-20	1.72581e-16	5.94554e-20	0.001	0.00399507
chr11:108637788_rs2726888	TCONS_00005623_DDX10	10.3552	10.1451	5.94554e-20	1.72581e-16	5.94554e-20	0.001	0.00399507
chr8:95273837_rs2470724	TCONS_00031145_GEM	-12.6685	-10.1007	8.06914e-20	3.05806e-16	8.06914e-20	0.001	0.00399507
chr8:95273837_rs2470724	TCONS_00031146_GEM	12.6685	10.1007	8.06914e-20	3.05806e-16	8.06914e-20	0.001	0.00399507
chr18:2968752_rs625527	TCONS_00014936_LPIN2	3.54103	10.061	1.06025e-19	1.07323e-15	1.06025e-19	0.001	0.00399507
chr1:111209920_rs2840384	TCONS_00002586_KCNA3	6.06625	10.0521	1.12688e-19	5.77629e-16	1.12688e-19	0.001	0.00399507
chr7:43804695_rs1181574	TCONS_00029724_COA1	-10.4773	-10.0392	1.23102e-19	3.38664e-16	1.23102e-19	0.001	0.00399507
chr9:139294637_rs191129675	TCONS_00032746_CARD9	19.3042	10.019	1.41396e-19	7.11175e-16	1.41396e-19	0.001	0.00399507
chr22:50639636_rs6010201	TCONS_00021669_SELO	-4.72379	-10.0177	1.42709e-19	5.71059e-16	1.42709e-19	0.001	0.00399507
chr7:99971313_rs2405442	TCONS_00029145_PILRB	-3.36579	-9.95393	2.20797e-19	6.02982e-16	2.20797e-19	0.001	0.00399507
chr7:33071266_rs10270155	TCONS_00029673_NT5C3A	-1.43783	-9.95052	2.26005e-19	6.16954e-16	2.26005e-19	0.001	0.00399507
chr9:113801441_rs10980701	TCONS_00032470_LPAR1	17.7899	9.93365	2.53643e-19	1.23912e-15	2.53643e-19	0.001	0.00399507
chr1:169337853_rs1517748	TCONS_00001383_BLZF1	3.21267	9.92957	2.60808e-19	1.29494e-15	2.60808e-19	0.001	0.00399507
chr4:89183131_rs1129043	TCONS_00024920_PPM1K	2.51792	9.91785	2.8256e-19	1.1194e-15	2.8256e-19	0.001	0.00399507
chr4:89183131_rs1129043	TCONS_00024918_PPM1K	-2.51792	-9.91785	2.8256e-19	1.1194e-15	2.8256e-19	0.001	0.00399507
chr6:31555392_rs2256974	TCONS_00027058_LST1	4.79958	9.90401	3.10571e-19	3.43246e-16	3.10571e-19	0.001	0.00399507
chr15:89422286_rs3809574	TCONS_00011071_HAPLN3	3.77142	9.84812	4.54694e-19	2.68018e-15	4.54694e-19	0.001	0.00399507
chr1:156908986_rs3765788	TCONS_00002916_ARHGEF11	1.80697	9.84233	4.73016e-19	2.31827e-15	4.73016e-19	0.001	0.00399507
chr5:36256564_rs7716771	TCONS_00026073_RANBP3L	-5.53503	-9.84128	4.76384e-19	1.62303e-15	4.76384e-19	0.001	0.00399507
chr19:3535383_rs34325864	TCONS_00016404_MFSD12	3.24051	9.84097	4.7741e-19	2.9206e-15	4.7741e-19	0.001	0.00399507
chr17:61852186_rs3760252	TCONS_00013384_DDX42	-4.07672	-9.82903	5.17839e-19	2.0516e-15	5.17839e-19	0.001	0.00399507
chr12:58142854_rs2069506	TCONS_00007196_TSFM	-13.0295	-9.82789	5.21882e-19	1.82421e-15	5.21882e-19	0.001	0.00399507
chr5:131596419_rs10076701	TCONS_00026326_P4HA2	-12.0564	-9.81589	5.66307e-19	1.92205e-15	5.66307e-19	0.001	0.00399507
chr12:107341385_rs7974499	TCONS_00007365_C12orf23	15.7707	9.80406	6.13785e-19	2.13351e-15	6.13785e-19	0.001	0.00399507
chr20:62211185_rs6090461	TCONS_00020864_HELZ2	9.02726	9.79806	6.39381e-19	1.89443e-15	6.39381e-19	0.001	0.00399507
chr3:190273896_rs16865595	TCONS_00023123_IL1RAP	-10.9583	-9.79699	6.44041e-19	3.36173e-15	6.44041e-19	0.001	0.00399507
chr3:190273896_rs16865595	TCONS_00023122_IL1RAP	10.9583	9.79699	6.44041e-19	3.36173e-15	6.44041e-19	0.001	0.00399507
chr15:22922576_rs7171787	TCONS_00010159_CYFIP1	5.60462	9.77655	7.40038e-19	4.28755e-15	7.40038e-19	0.001	0.00399507
chr7:139724358_rs2269996	TCONS_00030205_PARP12	1.87496	9.75337	8.66291e-19	2.31953e-15	8.66291e-19	0.001	0.00399507
chr1:232669231_rs16857578	TCONS_00003294_SIPA1L2	23.7294	9.74861	8.94744e-19	4.28564e-15	8.94744e-19	0.001	0.00399507
chr19:48573779_rs2386973	TCONS_00017018_PLA2G4C	5.23898	9.73997	9.48814e-19	5.72686e-15	9.48814e-19	0.001	0.00399507
chr16:88009781_rs59619086	TCONS_00011946_BANP	9.41256	9.69663	1.27302e-18	1.83245e-14	1.27302e-18	0.001	0.00399507
chr10:5000917_rs76216796	TCONS_00003482_AKR1C3	-30.5391	-9.66905	1.53446e-18	5.39142e-15	1.53446e-18	0.001	0.00399507
chr10:5000917_rs76216796	TCONS_00003483_AKR1C3	30.5391	9.66905	1.53446e-18	5.39142e-15	1.53446e-18	0.001	0.00399507
chr11:35246865_rs2421825	TCONS_00004979_CD44	4.87427	9.65213	1.72063e-18	4.10106e-15	1.72063e-18	0.001	0.00399507
chr2:97148124_rs183888333	TCONS_00019229_NEURL3	-31.175	-9.64458	1.8108e-18	1.19596e-14	1.8108e-18	0.001	0.00399507
chr12:109014241_rs59367899	TCONS_00008119_SELPLG	-39.7776	-9.63548	1.92581e-18	6.44945e-15	1.92581e-18	0.001	0.00399507
chr10:30717561_rs303432	TCONS_00003658_MAP3K8	2.45379	9.63397	1.94556e-18	6.79129e-15	1.94556e-18	0.001	0.00399507
chr20:43503276_rs6017437	TCONS_00020063_YWHAB	2.541	9.63269	1.96238e-18	5.62992e-15	1.96238e-18	0.001	0.00399507
chr20:43503276_rs6017437	TCONS_00020062_YWHAB	-2.541	-9.63269	1.96238e-18	5.62992e-15	1.96238e-18	0.001	0.00399507
chr2:201999550_rs28636431	TCONS_00018385_CFLAR	2.38538	9.62393	2.08213e-18	1.36417e-14	2.08213e-18	0.001	0.00399507
chr17:38804561_rs3752026	TCONS_00014072_SMARCE1	-4.26787	-9.62012	2.13642e-18	7.95352e-15	2.13642e-18	0.001	0.00399507
chr17:38804561_rs3752026	TCONS_00014070_SMARCE1	4.26787	9.62012	2.13642e-18	7.95352e-15	2.13642e-18	0.001	0.00399507
chr6:32573910_rs2647071	TCONS_00028002_HLA-DRB5	-21.77	-9.6164	2.19079e-18	2.30261e-15	2.19079e-18	0.001	0.00399507
chr19:55966144_rs79639598	TCONS_00017415_ISOC2	13.8032	9.55125	3.40039e-18	2.02107e-14	3.40039e-18	0.001	0.00399507
chr19:55966144_rs79639598	TCONS_00017416_ISOC2	-13.8032	-9.55125	3.40039e-18	2.02107e-14	3.40039e-18	0.001	0.00399507
chr22:50639778_rs3747942	TCONS_00021668_SELO	3.91203	9.53677	3.74878e-18	1.24905e-14	3.74878e-18	0.001	0.00399507
chr7:80306271_rs7755	TCONS_00029082_CD36	-2.19527	-9.49277	5.04053e-18	1.30083e-14	5.04053e-18	0.001	0.00399507
chr3:16303647_rs842256	TCONS_00023221_DPH3	-4.86379	-9.48442	5.33159e-18	2.59807e-14	5.33159e-18	0.001	0.00399507
chr3:16303647_rs842256	TCONS_00023222_DPH3	4.86379	9.48442	5.33159e-18	2.59807e-14	5.33159e-18	0.001	0.00399507
chr17:46192282_rs8069889	TCONS_00013252_SNX11	8.70832	9.46923	5.90451e-18	2.06787e-14	5.90451e-18	0.001	0.00399507
chr10:48305258_rs7084135	TCONS_00018892_add_AGAP9	5.49273	9.46797	5.95472e-18	1.98788e-14	5.95472e-18	0.001	0.00399507
chr5:94241662_rs10039473	TCONS_00026251_MCTP1	2.73258	9.45055	6.69391e-18	2.16348e-14	6.69391e-18	0.001	0.00399507
chr1:89855441_rs7516996	TCONS_00000649_GBP1P1	5.46043	9.45011	6.71336e-18	2.99337e-14	6.71336e-18	0.001	0.00399507
chr15:22922576_rs7171787	TCONS_00010160_CYFIP1	-5.48225	-9.44475	6.9593e-18	3.69031e-14	6.9593e-18	0.001	0.00399507
chr6:139349921_rs2504376	TCONS_00027568_ABRACL	4.17149	9.43981	7.19399e-18	7.26482e-15	7.19399e-18	0.001	0.00399507
chr6:139349921_rs2504376	TCONS_00027570_ABRACL	-4.17149	-9.43981	7.19399e-18	7.26482e-15	7.19399e-18	0.001	0.00399507
chr17:78184393_rs7503034	TCONS_00014597_SGSH	-5.36606	-9.40416	9.1364e-18	3.11525e-14	9.1364e-18	0.001	0.00399507
chr17:78184393_rs7503034	TCONS_00014600_SGSH	5.36606	9.40416	9.1364e-18	3.11525e-14	9.1364e-18	0.001	0.00399507
chr15:34816683_rs144621670	TCONS_00010697_GOLGA8B	34.2005	9.40354	9.17407e-18	4.79596e-14	9.17407e-18	0.001	0.00399507
chr11:129993432_rs3886745	TCONS_00005753_APLP2	8.85939	9.38981	1.00578e-17	2.1214e-14	1.00578e-17	0.001	0.00399507
chr10:82214792_rs4934189	TCONS_00003931_TSPAN14	6.39596	9.36604	1.17922e-17	3.79241e-14	1.17922e-17	0.001	0.00399507
chr9:209359_rs473700	TCONS_00032098_CBWD1	-2.96271	-9.36525	1.18546e-17	5.15055e-14	1.18546e-17	0.001	0.00399507
chr1:161008803_rs3766382	TCONS_00002968_F11R	1.06265	9.32498	1.55154e-17	6.69685e-14	1.55154e-17	0.001	0.00399507
chr1:236016715_rs3768072	TCONS_00003329_LYST	-0.484794	-9.32419	1.55976e-17	6.72978e-14	1.55976e-17	0.001	0.00399507
chr7:98980659_rs11973460	TCONS_00029109_ARPC1B	-3.66182	-9.32346	1.56733e-17	3.96407e-14	1.56733e-17	0.001	0.00399507
chr1:89849201_rs928652	TCONS_00000648_GBP1P1	5.00518	9.3212	1.59114e-17	6.85218e-14	1.59114e-17	0.001	0.00399507
chr10:129881701_rs7085589	TCONS_00004156_PTPRE	1.97	9.31744	1.6316e-17	5.053e-14	1.6316e-17	0.001	0.00399507
chr7:38218683_rs10464362	TCONS_00028813_STARD3NL	-7.51568	-9.30832	1.73407e-17	4.38248e-14	1.73407e-17	0.001	0.00399507
chr5:467977_rs190811224	TCONS_00025294_EXOC3	-26.7029	-9.27339	2.1888e-17	6.94825e-14	2.1888e-17	0.001	0.00399507
chr5:467977_rs190811224	TCONS_00025298_EXOC3	26.7029	9.27339	2.1888e-17	6.94825e-14	2.1888e-17	0.001	0.00399507
chr20:3473515_rs6115923	TCONS_00019833_ATRN	-7.41234	-9.25501	2.47375e-17	6.581e-14	2.47375e-17	0.001	0.00399507
chr13:26783582_rs4100617	TCONS_00008775_RNF6	3.29613	9.23533	2.81992e-17	1.59671e-13	2.81992e-17	0.001	0.00399507
chr19:54800500_rs367070	TCONS_00017371_LILRA6	6.60878	9.23468	2.83217e-17	1.59196e-13	2.83217e-17	0.001	0.00399507
chr6:26406053_rs3857549	TCONS_00026877_BTN3A2	-18.4494	-9.21365	3.25719e-17	3.05621e-14	3.25719e-17	0.001	0.00399507
chr9:102807279_rs4743380	TCONS_00031803_STX17	-2.55231	-9.20447	3.46203e-17	1.44396e-13	3.46203e-17	0.001	0.00399507
chr9:102807279_rs4743380	TCONS_00031802_STX17	2.55231	9.20447	3.46203e-17	1.44396e-13	3.46203e-17	0.001	0.00399507
chr15:75130093_rs12898397	TCONS_00010983_ULK3	-11.6073	-9.20135	3.53451e-17	1.73408e-13	3.53451e-17	0.001	0.00399507
chr8:74870647_rs1559797	TCONS_00031104_TCEB1	-4.84633	-9.19712	3.63515e-17	1.08548e-13	3.63515e-17	0.001	0.00399507
chr6:29730848_rs114819893	TCONS_00026933_HLA-G	-8.31232	-9.19339	3.72633e-17	3.48385e-14	3.72633e-17	0.001	0.00399507
chr10:85915186_rs7096124	TCONS_00003943_GHITM	2.21133	9.18686	3.89143e-17	1.1557e-13	3.89143e-17	0.001	0.00399507
chr10:85915186_rs7096124	TCONS_00003942_GHITM	-2.21133	-9.18686	3.89143e-17	1.1557e-13	3.89143e-17	0.001	0.00399507
chr7:102351847_rs4729851	TCONS_00030022_RASA4	-7.01892	-9.1821	4.01625e-17	9.97362e-14	4.01625e-17	0.001	0.00399507
chr8:38855062_rs7831735	TCONS_00030974_TM2D2	3.30659	9.17081	4.32874e-17	1.28141e-13	4.32874e-17	0.001	0.00399507
chr8:38855062_rs7831735	TCONS_00030973_TM2D2	-3.30659	-9.17081	4.32874e-17	1.28141e-13	4.32874e-17	0.001	0.00399507
chr7:99905684_rs28401739	TCONS_00029138_PILRB	8.13932	9.16638	4.45784e-17	1.10498e-13	4.45784e-17	0.001	0.00399507
chr15:34874382_rs6495688	TCONS_00010701_GOLGA8B	-17.1006	-9.16344	4.54563e-17	2.20356e-13	4.54563e-17	0.001	0.00399507
chr2:10548826_rs3771130	TCONS_00017472_HPCAL1	4.81722	9.15314	4.8666e-17	2.82276e-13	4.8666e-17	0.001	0.00399507
chr6:29688501_rs2517910	TCONS_00026988_HLA-G	8.67982	9.15166	4.91466e-17	4.56938e-14	4.91466e-17	0.001	0.00399507
chr6:26383459_rs9467741	TCONS_00026882_BTN2A2	10.0864	9.14443	5.15581e-17	4.7871e-14	5.15581e-17	0.001	0.00399507
chr4:159838469_rs28530562	TCONS_00024569_FNIP2	1.40461	9.12385	5.9085e-17	1.9778e-13	5.9085e-17	0.001	0.00399507
chr22:39354742_rs7292690	TCONS_00021577_APOBEC3B	-28.7204	-9.08148	7.8189e-17	2.3626e-13	7.8189e-17	0.001	0.00399507
chr4:83944060_rs12643434	TCONS_00024889_SEC31A	-1.24007	-9.07852	7.97344e-17	2.63428e-13	7.97344e-17	0.001	0.00399507
chr4:83944060_rs12643434	TCONS_00024903_SEC31A	1.24007	9.07852	7.97344e-17	2.63428e-13	7.97344e-17	0.001	0.00399507
chr14:95554142_rs1057035	TCONS_00010002_DICER1	-2.69599	-9.07582	8.11722e-17	2.01464e-13	8.11722e-17	0.001	0.00399507
chr15:78596906_rs2090679	TCONS_00011027_WDR61	-15.291	-9.06409	8.77063e-17	3.98566e-13	8.77063e-17	0.001	0.00399507
chr15:78596906_rs2090679	TCONS_00011029_WDR61	15.291	9.06409	8.77063e-17	3.98566e-13	8.77063e-17	0.001	0.00399507
chr7:28724502_rs6965754	TCONS_00028756_CREB5	-7.95316	-9.05446	9.34615e-17	2.27217e-13	9.34615e-17	0.001	0.00399507
chr7:30608652_rs38484	TCONS_00158251_add_LOC401320	-6.52569	-9.04088	1.02219e-16	2.4788e-13	1.02219e-16	0.001	0.00399507
chr1:145428400_rs6424377	TCONS_00000823_NBPF10	4.42224	9.03044	1.09498e-16	4.22239e-13	1.09498e-16	0.001	0.00399507
chr2:71035335_rs59923790	TCONS_00019089_CLEC4F	10.8462	9.02958	1.10127e-16	6.21219e-13	1.10127e-16	0.001	0.00399507
chr6:149999222_rs4380763	TCONS_00028500_LATS1	-2.40339	-9.02849	1.10919e-16	1.00902e-13	1.10919e-16	0.001	0.00399507
chr16:30326571_rs8050176	TCONS_00012263_LOC595101	8.27917	8.99033	1.42596e-16	1.43994e-12	1.42596e-16	0.001	0.00399507
chr16:30326571_rs8050176	TCONS_00012264_LOC595101	-8.27917	-8.99033	1.42596e-16	1.43994e-12	1.42596e-16	0.001	0.00399507
chr3:196014366_rs6809764	TCONS_00024026_PCYT1A	-4.0766	-8.98396	1.487e-16	6.0349e-13	1.487e-16	0.001	0.00399507
chr3:196014366_rs6809764	TCONS_00024027_PCYT1A	4.0766	8.98396	1.487e-16	6.0349e-13	1.487e-16	0.001	0.00399507
chr4:142639645_rs2131412	TCONS_00024505_IL15	-4.54436	-8.97306	1.59747e-16	5.03444e-13	1.59747e-16	0.001	0.00399507
chr2:71056741_rs13414647	TCONS_00019106_CD207	-15.7569	-8.96841	1.64707e-16	9.12769e-13	1.64707e-16	0.001	0.00399507
chr2:71056741_rs13414647	TCONS_00019107_CD207	15.7569	8.96841	1.64707e-16	9.12769e-13	1.64707e-16	0.001	0.00399507
chr18:67601636_rs1823778	TCONS_00015076_CD226	7.89821	8.96305	1.70605e-16	9.07075e-13	1.70605e-16	0.001	0.00399507
chr16:31363977_rs11574631	TCONS_00011630_ITGAX	-2.10855	-8.95562	1.79142e-16	1.76536e-12	1.79142e-16	0.001	0.00399507
chr19:3540769_rs150908739	TCONS_00016410_MFSD12	-2.43307	-8.92657	2.1677e-16	1.13535e-12	2.1677e-16	0.001	0.00399507
chr10:50023350_rs11101512	TCONS_00003735_WDFY4	-7.35313	-8.91119	2.39768e-16	6.70431e-13	2.39768e-16	0.001	0.00399507
chr11:59939954_rs597982	TCONS_00006176_MS4A6A	13.8416	8.9109	2.40225e-16	4.3517e-13	2.40225e-16	0.001	0.00399507
chr3:75822036_rs6787680	TCONS_00120185_add_LOC401074	-11.8669	-8.88395	2.86586e-16	1.13699e-12	2.86586e-16	0.001	0.00399507
chr6:31204213_rs182809384	TCONS_00027878_HLA-C	-1.37449	-8.88126	2.91685e-16	2.58277e-13	2.91685e-16	0.001	0.00399507
chr6:31204213_rs182809384	TCONS_00027879_HLA-C	1.37449	8.88126	2.91685e-16	2.58277e-13	2.91685e-16	0.001	0.00399507
chr9:34378685_rs80317390	TCONS_00031595_NUDT2	29.6575	8.87281	3.0826e-16	1.12087e-12	3.0826e-16	0.001	0.00399507
chr11:833589_rs7947690	TCONS_00004797_CD151	-4.18001	-8.8497	3.58532e-16	6.33065e-13	3.58532e-16	0.001	0.00399507
chr11:833589_rs7947690	TCONS_00004796_CD151	4.18001	8.8497	3.58532e-16	6.33065e-13	3.58532e-16	0.001	0.00399507
chr19:36254702_rs10401156	TCONS_00016781_IGFLR1	-4.52168	-8.84172	3.7771e-16	1.9343e-12	3.7771e-16	0.001	0.00399507
chr1:156908986_rs3765788	TCONS_00002917_ARHGEF11	-2.28873	-8.83843	3.85925e-16	1.3202e-12	3.85925e-16	0.001	0.00399507
chr19:50034045_rs74255083	TCONS_00015927_RCN3	-16.6686	-8.83192	4.02674e-16	2.05748e-12	4.02674e-16	0.001	0.00399507
chr3:49035885_rs6414613	TCONS_00022444_ARIH2	-4.83202	-8.7956	5.10323e-16	1.96253e-12	5.10323e-16	0.001	0.00399507
chr10:91152593_rs303218	TCONS_00003975_IFIT1	-2.08192	-8.77688	5.76489e-16	1.54965e-12	5.76489e-16	0.001	0.00399507
chr10:91152593_rs303218	TCONS_00003974_IFIT1	2.08192	8.77688	5.76489e-16	1.54965e-12	5.76489e-16	0.001	0.00399507
chr4:185564746_rs2720377	TCONS_00025225_CASP3	-8.74444	-8.77165	5.96467e-16	1.70449e-12	5.96467e-16	0.001	0.00399507
chr11:66215423_rs11227485	TCONS_00006354_MRPL11	-8.84274	-8.77131	5.97757e-16	1.0359e-12	5.97757e-16	0.001	0.00399507
chr11:66215423_rs11227485	TCONS_00006355_MRPL11	8.84274	8.77131	5.97757e-16	1.0359e-12	5.97757e-16	0.001	0.00399507
chr10:48305258_rs7084135	TCONS_00018886_add_AGAP9	-5.66743	-8.7614	6.37571e-16	1.71041e-12	6.37571e-16	0.001	0.00399507
chr12:1190134_rs1362135	TCONS_00006732_ERC1	-7.64556	-8.73223	7.70711e-16	2.15825e-12	7.70711e-16	0.001	0.00399507
chr11:611503_rs7941547	TCONS_00005836_IRF7	-3.52409	-8.73101	7.76859e-16	1.3372e-12	7.76859e-16	0.001	0.00399507
chr1:79094081_rs1333973	TCONS_00000601_IFI44L	-1.87776	-8.72661	7.99378e-16	2.5826e-12	7.99378e-16	0.001	0.00399507
chr11:68024813_rs2458265	TCONS_00006381_C11orf24	-3.385	-8.69969	9.51946e-16	1.61952e-12	9.51946e-16	0.001	0.00399507
chr11:68024813_rs2458265	TCONS_00006382_C11orf24	3.385	8.69969	9.51946e-16	1.61952e-12	9.51946e-16	0.001	0.00399507
chr2:75103322_rs3771763	TCONS_00017778_HK2	-3.15674	-8.68966	1.01592e-15	5.19449e-12	1.01592e-15	0.001	0.00399507
chr2:75103322_rs3771763	TCONS_00017777_HK2	3.15674	8.68966	1.01592e-15	5.19449e-12	1.01592e-15	0.001	0.00399507
chr22:29664423_rs2301291	TCONS_00021399_GAS2L1	-7.60057	-8.68263	1.06322e-15	2.80295e-12	1.06322e-15	0.001	0.00399507
chr15:45924981_rs2733246	TCONS_00010287_SQRDL	-3.1931	-8.68234	1.06524e-15	4.23509e-12	1.06524e-15	0.001	0.00399507
chr15:45924981_rs2733246	TCONS_00010289_SQRDL	3.1931	8.68234	1.06524e-15	4.23509e-12	1.06524e-15	0.001	0.00399507
chr8:18705250_rs34270955	TCONS_00166470_add_PSD3	1.42813	8.68228	1.06567e-15	2.8206e-12	1.06567e-15	0.001	0.00399507
chr17:77077452_rs73398101	TCONS_00013522_ENGASE	20.9029	8.67211	1.13823e-15	3.30833e-12	1.13823e-15	0.001	0.00399507
chr17:77077452_rs73398101	TCONS_00013521_ENGASE	-20.9029	-8.67211	1.13823e-15	3.30833e-12	1.13823e-15	0.001	0.00399507
chr3:119347400_rs2280580	TCONS_00022730_PLA1A	8.50201	8.66572	1.18631e-15	4.35565e-12	1.18631e-15	0.001	0.00399507
chr3:119347400_rs2280580	TCONS_00022729_PLA1A	-8.50201	-8.66572	1.18631e-15	4.35565e-12	1.18631e-15	0.001	0.00399507
chr10:46136306_rs4949013	TCONS_00003708_FAM21C	-11.5146	-8.66298	1.20752e-15	3.11457e-12	1.20752e-15	0.001	0.00399507
chr8:74861484_rs7830335	TCONS_00031106_TCEB1	3.93014	8.6599	1.23186e-15	3.22593e-12	1.23186e-15	0.001	0.00399507
chr15:75130093_rs12898397	TCONS_00010984_ULK3	11.0082	8.65725	1.25316e-15	4.93876e-12	1.25316e-15	0.001	0.00399507
chr19:7792199_rs7409459	TCONS_00016494_CLEC4G	4.62555	8.65033	1.31053e-15	6.3512e-12	1.31053e-15	0.001	0.00399507
chr19:45377467_rs2075642	TCONS_00015813_PVRL2	2.64249	8.65013	1.31226e-15	6.35409e-12	1.31226e-15	0.001	0.00399507
chr19:45377467_rs2075642	TCONS_00015815_PVRL2	-2.64249	-8.65013	1.31226e-15	6.35409e-12	1.31226e-15	0.001	0.00399507
chr20:56183960_rs6070180	TCONS_00020830_ZBP1	6.31011	8.63735	1.42522e-15	3.25903e-12	1.42522e-15	0.001	0.00399507
chr7:43804695_rs1181574	TCONS_00029725_COA1	8.41555	8.61782	1.61689e-15	3.62122e-12	1.61689e-15	0.001	0.00399507
chr2:163128824_rs3747517	TCONS_00019432_IFIH1	1.15306	8.60924	1.70905e-15	8.52583e-12	1.70905e-15	0.001	0.00399507
chr2:163128824_rs3747517	TCONS_00019436_IFIH1	-1.15306	-8.60924	1.70905e-15	8.52583e-12	1.70905e-15	0.001	0.00399507
chr3:49189195_rs61583136	TCONS_00022451_WDR6	18.8959	8.60581	1.74731e-15	6.26532e-12	1.74731e-15	0.001	0.00399507
chr2:187522750_rs13006483	TCONS_00018254_ITGAV	-4.89653	-8.59698	1.84972e-15	9.16618e-12	1.84972e-15	0.001	0.00399507
chr19:14879034_rs9305048	TCONS_00016659_EMR2	8.988	8.58136	2.04574e-15	9.75916e-12	2.04574e-15	0.001	0.00399507
chr1:150406110_rs13374465	TCONS_00000908_MRPS21	4.3611	8.58092	2.05148e-15	6.354e-12	2.05148e-15	0.001	0.00399507
chr1:150406110_rs13374465	TCONS_00000907_MRPS21	-4.3611	-8.58092	2.05148e-15	6.354e-12	2.05148e-15	0.001	0.00399507
chr7:64150849_rs6460178	TCONS_00028932_ZNF107	-6.94638	-8.56578	2.26162e-15	5.00835e-12	2.26162e-15	0.001	0.00399507
chr3:48375434_rs11713476	TCONS_00022427_ZNF589	-9.01543	-8.54752	2.54372e-15	8.86736e-12	2.54372e-15	0.001	0.00399507
chr10:71905695_rs10999158	TCONS_00004456_SAR1A	2.35407	8.52073	3.02182e-15	7.50153e-12	3.02182e-15	0.001	0.00399507
chr10:127738918_rs1710278	TCONS_00004723_ADAM12	7.21397	8.51797	3.07572e-15	7.62475e-12	3.07572e-15	0.001	0.00399507
chr5:36256564_rs7716771	TCONS_00026078_RANBP3L	3.49756	8.51792	3.07671e-15	8.12302e-12	3.07671e-15	0.001	0.00399507
chr10:14574784_rs11259158	TCONS_00004278_FAM107B	-9.47751	-8.51546	3.12571e-15	7.7415e-12	3.12571e-15	0.001	0.00399507
chr10:14574784_rs11259158	TCONS_00004279_FAM107B	9.47751	8.51546	3.12571e-15	7.7415e-12	3.12571e-15	0.001	0.00399507
chr11:87908346_rs302647	TCONS_00006493_RAB38	4.94874	8.50906	3.25693e-15	5.35205e-12	3.25693e-15	0.001	0.00399507
chr6:3064249_rs12203636	TCONS_00026780_RIPK1	10.3378	8.49047	3.66941e-15	3.00748e-12	3.66941e-15	0.001	0.00399507
chr6:3064249_rs12203636	TCONS_00026783_RIPK1	-10.3378	-8.49047	3.66941e-15	3.00748e-12	3.66941e-15	0.001	0.00399507
chr6:163794814_rs2064223	TCONS_00151012_add_CAHM	-7.19988	-8.48955	3.69128e-15	3.02442e-12	3.69128e-15	0.001	0.00399507
chr2:187701561_rs13414172	TCONS_00018250_ITGAV	3.97525	8.4893	3.69704e-15	1.76483e-11	3.69704e-15	0.001	0.00399507
chr1:197704717_rs17641524	TCONS_00003113_DENND1B	6.91897	8.48505	3.79918e-15	1.13694e-11	3.79918e-15	0.001	0.00399507
chr1:247373628_rs4314914	TCONS_00003380_MIR3916	3.82107	8.48189	3.87704e-15	1.15651e-11	3.87704e-15	0.001	0.00399507
chr9:134451843_rs7030401	TCONS_00032686_RAPGEF1	-5.55236	-8.47993	3.9261e-15	1.26856e-11	3.9261e-15	0.001	0.00399507
chr1:9300747_rs2268172	TCONS_00000071_H6PD	-15.4399	-8.47895	3.95069e-15	1.17755e-11	3.95069e-15	0.001	0.00399507
chr1:28208327_rs34631302	TCONS_00000291_THEMIS2	1.50929	8.47766	3.98346e-15	1.18639e-11	3.98346e-15	0.001	0.00399507
chr1:28208327_rs34631302	TCONS_00000290_THEMIS2	-1.50929	-8.47766	3.98346e-15	1.18639e-11	3.98346e-15	0.001	0.00399507
chr6:32573910_rs2647071	TCONS_00028004_HLA-DRB5	20.5793	8.47162	4.14076e-15	3.38023e-12	4.14076e-15	0.001	0.00399507
chr1:247373628_rs4314914	TCONS_00003379_MIR3916	-3.87633	-8.46074	4.43957e-15	1.31878e-11	4.43957e-15	0.001	0.00399507
chr12:102298161_rs116956830	TCONS_00007322_DRAM1	1.34062	8.45132	4.71554e-15	1.24349e-11	4.71554e-15	0.001	0.00399507
chr12:102298161_rs116956830	TCONS_00007318_DRAM1	-1.34062	-8.45132	4.71554e-15	1.24349e-11	4.71554e-15	0.001	0.00399507
chr22:39354742_rs7292690	TCONS_00021568_APOBEC3B	17.9006	8.44118	5.03172e-15	1.25224e-11	5.03172e-15	0.001	0.00399507
chr7:33071266_rs10270155	TCONS_00029672_NT5C3A	1.29497	8.43441	5.25407e-15	1.12345e-11	5.25407e-15	0.001	0.00399507
chr4:76654668_rs2869174	TCONS_00024300_USO1	0.405677	8.41575	5.91943e-15	1.5299e-11	5.91943e-15	0.001	0.00399507
chr4:76654668_rs2869174	TCONS_00024301_USO1	-0.405677	-8.41575	5.91943e-15	1.5299e-11	5.91943e-15	0.001	0.00399507
chr7:64150849_rs6460178	TCONS_00028930_ZNF107	10.6411	8.41469	5.95971e-15	1.26869e-11	5.95971e-15	0.001	0.00399507
chr7:142424782_rs4726571	TCONS_00029409_TCRBV2S1	19.211	8.39901	6.58724e-15	1.39652e-11	6.58724e-15	0.001	0.00399507
chr19:47758145_rs7254371	TCONS_00015869_CCDC9	4.91772	8.39099	6.93311e-15	3.14778e-11	6.93311e-15	0.001	0.00399507
chr22:36597655_rs132729	TCONS_00021864_APOL4	-23.5704	-8.38843	7.0471e-15	1.7365e-11	7.0471e-15	0.001	0.00399507
chr14:94854873_rs60947266	TCONS_00009996_SERPINA1	-6.50032	-8.38778	7.07629e-15	1.35749e-11	7.07629e-15	0.001	0.00399507
chr14:94854873_rs60947266	TCONS_00009997_SERPINA1	6.50032	8.38778	7.07629e-15	1.35749e-11	7.07629e-15	0.001	0.00399507
chr3:53272067_rs3821692	TCONS_00023567_TKT	-1.44585	-8.38502	7.20214e-15	2.35471e-11	7.20214e-15	0.001	0.00399507
chr3:53272067_rs3821692	TCONS_00023568_TKT	1.44585	8.38502	7.20214e-15	2.35471e-11	7.20214e-15	0.001	0.00399507
chr17:16342833_rs11871958	TCONS_00012854_TRPV2	2.45667	8.38255	7.31617e-15	1.97808e-11	7.31617e-15	0.001	0.00399507
chr6:28268452_rs1936365	TCONS_00026904_ZSCAN26	-12.4484	-8.36045	8.4222e-15	6.72261e-12	8.4222e-15	0.001	0.00399507
chr6:28268452_rs1936365	TCONS_00026905_ZSCAN26	12.4484	8.36045	8.4222e-15	6.72261e-12	8.4222e-15	0.001	0.00399507
chr10:46215431_rs2442927	TCONS_00003712_FAM21C	-15.3465	-8.35258	8.8552e-15	2.12726e-11	8.8552e-15	0.001	0.00399507
chr20:391025_rs6139109	TCONS_00019789_RBCK1	4.3678	8.35031	8.98389e-15	1.92839e-11	8.98389e-15	0.001	0.00399507
chr4:103802165_rs78640361	TCONS_00024955_UBE2D3	3.55456	8.33865	9.67545e-15	2.40415e-11	9.67545e-15	0.001	0.00399507
chr4:103802165_rs78640361	TCONS_00024957_UBE2D3	-3.55456	-8.33865	9.67545e-15	2.40415e-11	9.67545e-15	0.001	0.00399507
chr7:99971313_rs2405442	TCONS_00029144_PILRB	-2.34964	-8.32637	1.04612e-14	2.16983e-11	1.04612e-14	0.001	0.00399507
chr19:35465897_rs1862274	TCONS_00015646_GRAMD1A	3.11211	8.32266	1.07103e-14	4.70377e-11	1.07103e-14	0.001	0.00399507
chr22:39354742_rs7292690	TCONS_00021573_APOBEC3B	10.8198	8.31919	1.0949e-14	2.65763e-11	1.0949e-14	0.001	0.00399507
chr2:187498107_rs9333289	TCONS_00018252_ITGAV	3.34071	8.30992	1.16132e-14	5.32952e-11	1.16132e-14	0.001	0.00399507
chr3:75803267_rs6778366	TCONS_00120194_add_LOC401074	2.09102	8.2966	1.26372e-14	4.03974e-11	1.26372e-14	0.001	0.00399507
chr19:50845704_rs60182980	TCONS_00017226_NAPSB	-4.09697	-8.27475	1.45152e-14	6.24363e-11	1.45152e-14	0.001	0.00399507
chr19:50845704_rs60182980	TCONS_00017225_NAPSB	4.09697	8.27475	1.45152e-14	6.24363e-11	1.45152e-14	0.001	0.00399507
chr1:151742001_rs7521817	TCONS_00002749_TDRKH	-3.78264	-8.27299	1.46774e-14	4.12854e-11	1.46774e-14	0.001	0.00399507
chr6:3003917_rs147145402	TCONS_00026776_NQO2	-5.50228	-8.27273	1.47019e-14	1.15231e-11	1.47019e-14	0.001	0.00399507
chr19:17516620_rs28413174	TCONS_00016694_BST2	-1.62985	-8.27149	1.48177e-14	6.35676e-11	1.48177e-14	0.001	0.00399507
chr19:17516620_rs28413174	TCONS_00016695_BST2	1.62985	8.27149	1.48177e-14	6.35676e-11	1.48177e-14	0.001	0.00399507
chr8:8837354_rs7015461	TCONS_00030392_ERI1	-7.08647	-8.25343	1.66128e-14	3.84971e-11	1.66128e-14	0.001	0.00399507
chr8:8837354_rs7015461	TCONS_00030393_ERI1	7.08647	8.25343	1.66128e-14	3.84971e-11	1.66128e-14	0.001	0.00399507
chr15:38618257_rs954832	TCONS_00010196_SPRED1	1.28141	8.24598	1.7414e-14	6.31808e-11	1.7414e-14	0.001	0.00399507
chr12:1161169_rs12304497	TCONS_00006729_ERC1	-12.0383	-8.2381	1.83045e-14	4.65713e-11	1.83045e-14	0.001	0.00399507
chr16:4590910_rs12917680	TCONS_00012065_NMRAL1	15.4763	8.23657	1.84825e-14	1.33931e-10	1.84825e-14	0.001	0.00399507
chr16:4590910_rs12917680	TCONS_00012066_NMRAL1	-15.4763	-8.23657	1.84825e-14	1.33931e-10	1.84825e-14	0.001	0.00399507
chr5:52074902_rs1363955	TCONS_00025423_ITGA1	-5.45103	-8.214	2.13141e-14	5.33497e-11	2.13141e-14	0.001	0.00399507
chr5:52074902_rs1363955	TCONS_00025424_ITGA1	5.45103	8.214	2.13141e-14	5.33497e-11	2.13141e-14	0.001	0.00399507
chr10:11228512_rs670303	TCONS_00003524_CELF2	3.24335	8.1981	2.3563e-14	5.34626e-11	2.3563e-14	0.001	0.00399507
chr11:125461787_rs503288	TCONS_00005728_STT3A	-4.92271	-8.17843	2.66739e-14	4.07075e-11	2.66739e-14	0.001	0.00399507
chr11:125461787_rs503288	TCONS_00005731_STT3A	4.92271	8.17843	2.66739e-14	4.07075e-11	2.66739e-14	0.001	0.00399507
chr7:139734697_rs757833	TCONS_00030210_PARP12	2.11949	8.17351	2.75125e-14	5.46011e-11	2.75125e-14	0.001	0.00399507
chr4:2804985_rs2004189	TCONS_00024107_SH3BP2	4.76611	8.17159	2.78487e-14	6.31912e-11	2.78487e-14	0.001	0.00399507
chr19:8387207_rs1057232	TCONS_00015309_RPS28	-18.7514	-8.16814	2.84588e-14	1.17877e-10	2.84588e-14	0.001	0.00399507
chr19:8387207_rs1057232	TCONS_00015310_RPS28	18.7514	8.16814	2.84588e-14	1.17877e-10	2.84588e-14	0.001	0.00399507
chr16:84213114_rs2230130	TCONS_00067506_add_TAF1C	7.10835	8.16274	2.94435e-14	2.0908e-10	2.94435e-14	0.001	0.00399507
chr4:185564746_rs2720377	TCONS_00025226_CASP3	8.85162	8.15815	3.03063e-14	6.83056e-11	3.03063e-14	0.001	0.00399507
chr1:225978947_rs12045518	TCONS_00001733_SRP9	1.95518	8.15756	3.04196e-14	8.01824e-11	3.04196e-14	0.001	0.00399507
chr1:225978947_rs12045518	TCONS_00001732_SRP9	-1.95518	-8.15756	3.04196e-14	8.01824e-11	3.04196e-14	0.001	0.00399507
chr20:19916144_rs16981333	TCONS_00019897_RIN2	-3.52532	-8.14316	3.33025e-14	6.88076e-11	3.33025e-14	0.001	0.00399507
chr2:97000396_rs772173	TCONS_00017832_ITPRIPL1	-12.7816	-8.13451	3.51627e-14	1.54616e-10	3.51627e-14	0.001	0.00399507
chr3:37054601_rs4647260	TCONS_00023294_LRRFIP2	4.59119	8.10548	4.21919e-14	1.14185e-10	4.21919e-14	0.001	0.00399507
chr7:2278183_rs34418140	TCONS_00029578_FTSJ2	-5.49441	-8.10442	4.24713e-14	8.25187e-11	4.24713e-14	0.001	0.00399507
chr3:57223519_rs4481123	TCONS_00023586_HESX1	-2.19013	-8.1038	4.26387e-14	1.14185e-10	4.26387e-14	0.001	0.00399507
chr3:57223519_rs4481123	TCONS_00023587_HESX1	2.47161	8.09379	4.53991e-14	1.18801e-10	4.53991e-14	0.001	0.00399507
chr1:169337853_rs1517748	TCONS_00001382_BLZF1	-3.46828	-8.02622	6.92729e-14	1.73562e-10	6.92729e-14	0.001	0.00399507
chr5:94250056_rs186095	TCONS_00026249_MCTP1	-15.3144	-8.02515	6.97362e-14	1.66674e-10	6.97362e-14	0.001	0.00399507
chr7:28724502_rs6965754	TCONS_00028750_CREB5	1.99404	8.02305	7.06584e-14	1.34119e-10	7.06584e-14	0.001	0.00399507
chr17:39946683_rs2883071	TCONS_00014078_JUP	-3.32701	-8.01472	7.44288e-14	1.93289e-10	7.44288e-14	0.001	0.00399507
chr20:391025_rs6139109	TCONS_00019790_RBCK1	-6.80075	-7.99766	8.27744e-14	1.61882e-10	8.27744e-14	0.001	0.00399507
chr6:24807686_rs4504470	TCONS_00027817_FAM65B	3.07445	7.98502	8.95562e-14	6.56972e-11	8.95562e-14	0.001	0.00399507
chr10:75305785_rs4745717	TCONS_00004479_ECD	4.22636	7.98306	9.06569e-14	1.92329e-10	9.06569e-14	0.001	0.00399507
chr10:75305785_rs4745717	TCONS_00004478_ECD	-4.22636	-7.98306	9.06569e-14	1.92329e-10	9.06569e-14	0.001	0.00399507
chr15:101714409_rs1975752	TCONS_00011104_CHSY1	-3.01729	-7.98278	9.08137e-14	3.09806e-10	9.08137e-14	0.001	0.00399507
chr15:101714409_rs1975752	TCONS_00011105_CHSY1	3.01729	7.98278	9.08137e-14	3.09806e-10	9.08137e-14	0.001	0.00399507
chr6:36995535_rs2274588	TCONS_00027270_FGD2	-1.83697	-7.97191	9.71666e-14	7.10522e-11	9.71666e-14	0.001	0.00399507
chr14:92588002_rs3818263	TCONS_00009505_CPSF2	7.89731	7.97032	9.8135e-14	1.71875e-10	9.8135e-14	0.001	0.00399507
chr2:113993344_rs7589901	TCONS_00101827_add_PAX8	-1.65932	-7.96834	9.9348e-14	4.18656e-10	9.9348e-14	0.001	0.00399507
chr7:80320633_rs7797401	TCONS_00029079_CD36	-8.05697	-7.96749	9.98737e-14	1.86826e-10	9.98737e-14	0.001	0.00399507
chr17:48930965_rs11079937	TCONS_00014283_TOB1	6.93084	7.96193	1.03386e-13	2.66604e-10	1.03386e-13	0.001	0.00399507
chr17:48930965_rs11079937	TCONS_00014282_TOB1	-6.93084	-7.96193	1.03386e-13	2.66604e-10	1.03386e-13	0.001	0.00399507
chr19:3062857_rs11539938	TCONS_00016400_AES	-3.88455	-7.94137	1.1747e-13	4.43291e-10	1.1747e-13	0.001	0.00399507
chr19:3062857_rs11539938	TCONS_00016401_AES	3.88455	7.94137	1.1747e-13	4.43291e-10	1.1747e-13	0.001	0.00399507
chr18:61620766_rs9945924	TCONS_00080272_add_HMSD	9.26432	7.93643	1.21124e-13	5.07002e-10	1.21124e-13	0.001	0.00399507
chr3:119132554_rs4687855	TCONS_00022714_POGLUT1	-2.59224	-7.93386	1.23075e-13	2.98081e-10	1.23075e-13	0.001	0.00399507
chr20:42839175_rs41307187	TCONS_00020720_OSER1	-2.68194	-7.93368	1.23208e-13	2.37957e-10	1.23208e-13	0.001	0.00399507
chr20:42839175_rs41307187	TCONS_00020719_OSER1	2.68194	7.93368	1.23208e-13	2.37957e-10	1.23208e-13	0.001	0.00399507
chr4:185766446_rs34265628	TCONS_00025239_BC016366	3.82053	7.88256	1.69113e-13	3.38122e-10	1.69113e-13	0.001	0.00399507
chr17:34312215_rs854684	TCONS_00014016_CCL15-CCL14	8.97012	7.84905	2.07992e-13	5.25091e-10	2.07992e-13	0.001	0.00399507
chr10:13150909_rs12415802	TCONS_00003558_OPTN	4.08539	7.84257	2.16478e-13	4.21822e-10	2.16478e-13	0.001	0.00399507
chr10:13150909_rs12415802	TCONS_00003565_OPTN	-4.08539	-7.84257	2.16478e-13	4.21822e-10	2.16478e-13	0.001	0.00399507
chr10:51805775_rs12217677	TCONS_00003757_FAM21A	28.6133	7.83959	2.20501e-13	4.28103e-10	2.20501e-13	0.001	0.00399507
chr10:51805775_rs12217677	TCONS_00003758_FAM21A	-28.6133	-7.83959	2.20501e-13	4.28103e-10	2.20501e-13	0.001	0.00399507
chr3:146260986_rs2738907	TCONS_00023885_PLSCR1	-1.56078	-7.82617	2.39511e-13	5.56246e-10	2.39511e-13	0.001	0.00399507
chr3:146260986_rs2738907	TCONS_00023888_PLSCR1	1.56078	7.82617	2.39511e-13	5.56246e-10	2.39511e-13	0.001	0.00399507
chr17:34310256_rs76190126	TCONS_00014013_CCL15-CCL14	-17.306	-7.81817	2.51607e-13	6.32222e-10	2.51607e-13	0.001	0.00399507
chr16:4737981_rs841223	TCONS_00011305_MGRN1	7.0681	7.81708	2.53306e-13	1.57917e-09	2.53306e-13	0.001	0.00399507
chr16:4737981_rs841223	TCONS_00011304_MGRN1	-7.0681	-7.81708	2.53306e-13	1.57917e-09	2.53306e-13	0.001	0.00399507
chr19:54749060_rs11668526	TCONS_00017325_LILRB3	-3.42553	-7.81212	2.61152e-13	9.42634e-10	2.61152e-13	0.001	0.00399507
chr12:133519141_rs115182167	TCONS_00043313_add_ZNF605	8.79708	7.80447	2.73738e-13	6.50012e-10	2.73738e-13	0.001	0.00399507
chr10:104169733_rs72845694	TCONS_00004643_CUEDC2	11.8215	7.78662	3.05495e-13	5.47464e-10	3.05495e-13	0.001	0.00399507
chr10:104169733_rs72845694	TCONS_00004642_CUEDC2	-11.8215	-7.78662	3.05495e-13	5.47464e-10	3.05495e-13	0.001	0.00399507
chr11:57078721_rs3935068	TCONS_00006113_TNKS1BP1	-7.31535	-7.78168	3.14909e-13	4.31824e-10	3.14909e-13	0.001	0.00399507
chr11:57078721_rs3935068	TCONS_00006112_TNKS1BP1	7.31535	7.78168	3.14909e-13	4.31824e-10	3.14909e-13	0.001	0.00399507
chr20:45027364_rs6065979	TCONS_00020740_ELMO2	-8.18653	-7.76901	3.40383e-13	6.41046e-10	3.40383e-13	0.001	0.00399507
chr1:9308249_rs9435152	TCONS_00000072_H6PD	16.556	7.71961	4.60698e-13	1.06397e-09	4.60698e-13	0.001	0.00399507
chr3:140953898_rs2292400	TCONS_00022845_ACPL2	19.357	7.71838	4.64163e-13	1.01993e-09	4.64163e-13	0.001	0.00399507
chr3:140953898_rs2292400	TCONS_00022846_ACPL2	-19.357	-7.71838	4.64163e-13	1.01993e-09	4.64163e-13	0.001	0.00399507
chr11:35314455_rs10836367	TCONS_00004983_CD44	-3.12839	-7.69973	5.20208e-13	6.97206e-10	5.20208e-13	0.001	0.00399507
chr8:29953256_rs56969689	TCONS_00030504_LEPROTL1	1.83996	7.69886	5.22977e-13	1.0486e-09	5.22977e-13	0.001	0.00399507
chr8:29953256_rs56969689	TCONS_00030503_LEPROTL1	-1.83996	-7.69886	5.22977e-13	1.0486e-09	5.22977e-13	0.001	0.00399507
chr6:29642950_rs143194951	TCONS_00026978_HLA-G	-6.46447	-7.68951	5.53713e-13	3.78979e-10	5.53713e-13	0.001	0.00399507
chr12:133519141_rs115182167	TCONS_00043296_add_ZNF605	-8.70085	-7.68831	5.57767e-13	1.3073e-09	5.57767e-13	0.001	0.00399507
chr22:29734696_rs174766	TCONS_00021790_AP1B1	-4.86229	-7.68092	5.83513e-13	1.25407e-09	5.83513e-13	0.001	0.00399507
chr22:29734696_rs174766	TCONS_00021792_AP1B1	4.86229	7.68092	5.83513e-13	1.25407e-09	5.83513e-13	0.001	0.00399507
chr7:38394588_rs78434912	TCONS_00029697_Y00482	27.0716	7.68052	5.84919e-13	9.94365e-10	5.84919e-13	0.001	0.00399507
chr1:8021740_rs17523802	TCONS_00000064_PARK7	4.42482	7.67361	6.10099e-13	1.39882e-09	6.10099e-13	0.001	0.00399507
chr12:109018395_rs8179141	TCONS_00008134_CORO1C	7.38777	7.67279	6.13188e-13	1.43231e-09	6.13188e-13	0.001	0.00399507
chr15:51019812_rs17646025	TCONS_00010818_SPPL2A	-2.9165	-7.66238	6.53345e-13	1.89534e-09	6.53345e-13	0.001	0.00399507
chr15:51019812_rs17646025	TCONS_00010812_SPPL2A	2.9165	7.66238	6.53345e-13	1.89534e-09	6.53345e-13	0.001	0.00399507
chr19:54730202_rs10853870	TCONS_00017311_LILRB3	-8.41347	-7.65501	6.83343e-13	2.35364e-09	6.83343e-13	0.001	0.00399507
chr17:16351745_rs35774281	TCONS_00012851_TRPV2	4.61151	7.65246	6.94003e-13	1.70154e-09	6.94003e-13	0.001	0.00399507
chr17:34819191_rs4796217	TCONS_00014037_TBC1D3G	-16.3357	-7.64946	7.06818e-13	1.73113e-09	7.06818e-13	0.001	0.00399507
chr16:1293343_rs11642324	TCONS_00011994_TPSB2	-35.0542	-7.64325	7.34054e-13	4.27521e-09	7.34054e-13	0.001	0.00399507
chr19:36240614_rs7260184	TCONS_00016770_IGFLR1	5.67171	7.64063	7.45821e-13	2.56335e-09	7.45821e-13	0.001	0.00399507
chr20:17913286_rs6045109	TCONS_00019873_MGME1	-6.46397	-7.62056	8.42618e-13	1.55366e-09	8.42618e-13	0.001	0.00399507
chr20:17913286_rs6045109	TCONS_00019874_MGME1	6.46397	7.62056	8.42618e-13	1.55366e-09	8.42618e-13	0.001	0.00399507
chr12:69048936_rs12316768	TCONS_00007231_RAP1B	-2.13847	-7.61837	8.53889e-13	1.97508e-09	8.53889e-13	0.001	0.00399507
chr7:115635061_rs10270884	TCONS_00030091_TFEC	-4.08051	-7.61793	8.5619e-13	1.43016e-09	8.5619e-13	0.001	0.00399507
chr6:33389214_rs115895428	TCONS_00028134_CUTA	-6.49604	-7.59474	9.85574e-13	6.53982e-10	9.85574e-13	0.001	0.00399507
chr9:139327143_rs35531907	TCONS_00032757_SEC16A	14.8773	7.58332	1.05616e-12	2.72315e-09	1.05616e-12	0.001	0.00399507
chr1:222896220_rs73126803	TCONS_00001723_MIA3	-3.22952	-7.57503	1.11054e-12	2.49942e-09	1.11054e-12	0.001	0.00399507
chr22:50836982_rs9616935	TCONS_00022020_PLXNB2	12.0668	7.57432	1.11533e-12	2.27644e-09	1.11533e-12	0.001	0.00399507
chr6:31555392_rs2256974	TCONS_00027046_LST1	3.34327	7.57273	1.12614e-12	7.40355e-10	1.12614e-12	0.001	0.00399507
chr12:123199676_rs28675952	TCONS_00008282_HCAR1	-3.40445	-7.57063	1.14054e-12	2.63015e-09	1.14054e-12	0.001	0.00399507
chr1:154251259_rs79269068	TCONS_00005070_add_HAX1	5.72877	7.56987	1.1458e-12	2.57673e-09	1.1458e-12	0.001	0.00399507
chr1:154251259_rs79269068	TCONS_00005071_add_HAX1	-5.72877	-7.56987	1.1458e-12	2.57673e-09	1.1458e-12	0.001	0.00399507
chr7:98984354_rs1045012	TCONS_00029115_ARPC1B	2.78867	7.56439	1.18446e-12	1.9614e-09	1.18446e-12	0.001	0.00399507
chr12:109014241_rs59367899	TCONS_00008118_SELPLG	29.8453	7.5642	1.18584e-12	2.73004e-09	1.18584e-12	0.001	0.00399507
chr1:207784968_rs3818361	TCONS_00001659_CR1	12.3593	7.5637	1.18938e-12	2.67157e-09	1.18938e-12	0.001	0.00399507
chr13:114515874_rs11616772	TCONS_00008739_TMEM255B	6.5365	7.54395	1.34022e-12	4.08547e-09	1.34022e-12	0.001	0.00399507
chr13:114515874_rs11616772	TCONS_00008738_TMEM255B	-6.5365	-7.54395	1.34022e-12	4.08547e-09	1.34022e-12	0.001	0.00399507
chr6:31347451_rs74995800	TCONS_00027024_MICA	18.8354	7.53659	1.40115e-12	9.11863e-10	1.40115e-12	0.001	0.00399507
chr2:85760991_rs6731700	TCONS_00017800_VAMP5	-2.74534	-7.50812	1.66368e-12	6.17295e-09	1.66368e-12	0.001	0.00399507
chr1:111211533_rs1319782	TCONS_00002588_KCNA3	2.09282	7.50667	1.6783e-12	3.66291e-09	1.6783e-12	0.001	0.00399507
chr20:25449854_rs444699	TCONS_00020617_ABHD12	1.90558	7.50349	1.7108e-12	3.08288e-09	1.7108e-12	0.001	0.00399507
chr20:25449854_rs444699	TCONS_00020611_ABHD12	-1.90558	-7.50349	1.7108e-12	3.08288e-09	1.7108e-12	0.001	0.00399507
chr16:81046101_rs2549879	TCONS_00012471_CMC2	2.64353	7.49268	1.82583e-12	9.8758e-09	1.82583e-12	0.001	0.00399507
chr1:179894001_rs2762858	TCONS_00001438_TOR1AIP1	-4.08718	-7.49154	1.83843e-12	3.99481e-09	1.83843e-12	0.001	0.00399507
chr19:49371241_rs607356	TCONS_00015891_PPP1R15A	-2.63134	-7.48828	1.87489e-12	6.10377e-09	1.87489e-12	0.001	0.00399507
chr19:49371241_rs607356	TCONS_00015888_PPP1R15A	2.63134	7.48828	1.87489e-12	6.10377e-09	1.87489e-12	0.001	0.00399507
chr11:71187294_rs4944062	TCONS_00005470_NADSYN1	3.41204	7.47364	2.04742e-12	2.61265e-09	2.04742e-12	0.001	0.00399507
chr11:71187294_rs4944062	TCONS_00005471_NADSYN1	-3.41204	-7.47364	2.04742e-12	2.61265e-09	2.04742e-12	0.001	0.00399507
chr4:185780056_rs13103917	TCONS_00025238_BC016366	-6.39306	-7.46221	2.19295e-12	3.82769e-09	2.19295e-12	0.001	0.00399507
chr15:63502378_rs2652818	TCONS_00010336_RAB8B	-3.47748	-7.46193	2.19655e-12	5.94001e-09	2.19655e-12	0.001	0.00399507
chr1:110186563_rs12745189	TCONS_00000700_GSTM2	6.72785	7.45268	2.32204e-12	4.97265e-09	2.32204e-12	0.001	0.00399507
chr19:46282890_rs2070737	TCONS_00016959_DMPK	11.1751	7.45152	2.33822e-12	7.56201e-09	2.33822e-12	0.001	0.00399507
chr20:33678078_rs6060216	TCONS_00020659_EDEM2	2.75015	7.42306	2.77317e-12	4.93564e-09	2.77317e-12	0.001	0.00399507
chr20:33678078_rs6060216	TCONS_00020663_EDEM2	-2.75015	-7.42306	2.77317e-12	4.93564e-09	2.77317e-12	0.001	0.00399507
chr7:38399411_rs62445014	TCONS_00029696_Y00482	-17.4414	-7.41002	2.9983e-12	4.70935e-09	2.9983e-12	0.001	0.00399507
chr1:114450964_rs11102702	TCONS_00000764_DCLRE1B	-9.32847	-7.40557	3.0793e-12	6.52442e-09	3.0793e-12	0.001	0.00399507
chr1:114450964_rs11102702	TCONS_00000765_DCLRE1B	9.32847	7.40557	3.0793e-12	6.52442e-09	3.0793e-12	0.001	0.00399507
chr15:63218570_rs11636666	TCONS_00010334_TPM1	-17.5012	-7.40152	3.15477e-12	8.34807e-09	3.15477e-12	0.001	0.00399507
chr15:63218570_rs11636666	TCONS_00010333_TPM1	17.5012	7.40152	3.15477e-12	8.34807e-09	3.15477e-12	0.001	0.00399507
chr17:76992511_rs4789904	TCONS_00014589_CANT1	-8.37432	-7.40021	3.17952e-12	7.51026e-09	3.17952e-12	0.001	0.00399507
chr7:38337589_rs13222240	TCONS_00029692_TRGC2	-6.06587	-7.39743	3.23277e-12	5.04221e-09	3.23277e-12	0.001	0.00399507
chr7:38337589_rs13222240	TCONS_00029693_TRGC2	6.06587	7.39743	3.23277e-12	5.04221e-09	3.23277e-12	0.001	0.00399507
chr20:45027364_rs6065979	TCONS_00020742_ELMO2	-3.9679	-7.39223	3.3348e-12	5.87921e-09	3.3348e-12	0.001	0.00399507
chr6:42851497_rs2894484	TCONS_00027315_RPL7L1	-4.52667	-7.38768	3.42672e-12	2.13193e-09	3.42672e-12	0.001	0.00399507
chr11:18310449_rs10766467	TCONS_00005980_HPS5	-3.00605	-7.38542	3.47321e-12	4.33208e-09	3.47321e-12	0.001	0.00399507
chr1:179842107_rs479094	TCONS_00001441_TOR1AIP1	9.69064	7.36204	3.99319e-12	8.37667e-09	3.99319e-12	0.001	0.00399507
chr16:85809290_rs76341119	TCONS_00011935_COX4I1	2.23818	7.34927	4.30895e-12	2.15918e-08	4.30895e-12	0.001	0.00399507
chr16:85809290_rs76341119	TCONS_00011933_COX4I1	-2.23818	-7.34927	4.30895e-12	2.15918e-08	4.30895e-12	0.001	0.00399507
chr7:75150312_rs1167821	TCONS_00029856_NCF1C	3.38579	7.3467	4.37528e-12	6.71802e-09	4.37528e-12	0.001	0.00399507
chr20:47926561_rs6067048	TCONS_00020130_DDX27	4.20048	7.33413	4.71513e-12	8.1236e-09	4.71513e-12	0.001	0.00399507
chr11:34893286_rs56061305	TCONS_00006051_APIP	-5.69054	-7.30785	5.51216e-12	6.72976e-09	5.51216e-12	0.001	0.00399507
chr11:34893286_rs56061305	TCONS_00006052_APIP	5.69054	7.30785	5.51216e-12	6.72976e-09	5.51216e-12	0.001	0.00399507
chr6:31603591_rs115366947	TCONS_00027084_HSPA1B	18.5094	7.29204	6.05435e-12	3.63347e-09	6.05435e-12	0.001	0.00399507
chr6:31603591_rs115366947	TCONS_00027079_HSPA1B	-18.5094	-7.29204	6.05435e-12	3.63347e-09	6.05435e-12	0.001	0.00399507
chr1:111731158_rs2297703	TCONS_00002596_DRAM2	6.21942	7.2915	6.07372e-12	1.2504e-08	6.07372e-12	0.001	0.00399507
chr19:54730202_rs10853870	TCONS_00017320_LILRB3	6.43865	7.28317	6.38108e-12	1.98029e-08	6.38108e-12	0.001	0.00399507
chr1:954777_rs61766299	TCONS_00001863_HES4	3.67127	7.27221	6.80894e-12	1.3942e-08	6.80894e-12	0.001	0.00399507
chr2:191520845_rs2293765	TCONS_00018268_NAB1	-5.75288	-7.27126	6.84732e-12	2.32971e-08	6.84732e-12	0.001	0.00399507
chr9:102589745_rs1526267	TCONS_00031793_NR4A3	1.97497	7.26989	6.90305e-12	1.61065e-08	6.90305e-12	0.001	0.00399507
chr7:26155514_rs2107348	TCONS_00029643_HNRNPA2B1	2.04284	7.26985	6.90469e-12	1.03809e-08	6.90469e-12	0.001	0.00399507
chr9:132568500_rs10116248	TCONS_00032655_TOR1A	4.50039	7.25882	7.37046e-12	1.71578e-08	7.37046e-12	0.001	0.00399507
chr9:132568500_rs10116248	TCONS_00032654_TOR1A	-4.50039	-7.25882	7.37046e-12	1.71578e-08	7.37046e-12	0.001	0.00399507
chr19:8556363_rs7408912	TCONS_00015322_HNRNPM	2.21032	7.24791	7.86152e-12	2.40925e-08	7.86152e-12	0.001	0.00399507
chr11:613742_rs60870990	TCONS_00005823_IRF7	-2.78152	-7.24667	7.91919e-12	9.53169e-09	7.91919e-12	0.001	0.00399507
chr6:101275792_rs705588	TCONS_00028340_ASCC3	-1.81262	-7.24201	8.1401e-12	4.75223e-09	8.1401e-12	0.001	0.00399507
chr1:181018799_rs10797666	TCONS_00001459_MR1	-2.85348	-7.23891	8.2904e-12	1.6723e-08	8.2904e-12	0.001	0.00399507
chr1:181018799_rs10797666	TCONS_00001457_MR1	2.85348	7.23891	8.2904e-12	1.6723e-08	8.2904e-12	0.001	0.00399507
chr19:51737121_rs34813869	TCONS_00015987_CD33	-8.53963	-7.23709	8.37987e-12	2.56254e-08	8.37987e-12	0.001	0.00399507
chr6:119684853_rs10457355	TCONS_00028411_MAN1A1	-5.23501	-7.22992	8.74252e-12	5.07957e-09	8.74252e-12	0.001	0.00399507
chr6:3145457_rs77860936	TCONS_00027747_TUBB2B	-13.9132	-7.2159	9.49564e-12	5.49052e-09	9.49564e-12	0.001	0.00399507
chr6:3145457_rs77860936	TCONS_00027748_TUBB2B	13.9132	7.2159	9.49564e-12	5.49052e-09	9.49564e-12	0.001	0.00399507
chr7:940298_rs13224354	TCONS_00029552_ADAP1	9.77199	7.2149	9.55214e-12	1.41083e-08	9.55214e-12	0.001	0.00399507
chr7:940298_rs13224354	TCONS_00029551_ADAP1	-9.77199	-7.2149	9.55214e-12	1.41083e-08	9.55214e-12	0.001	0.00399507
chr5:131584178_rs4705929	TCONS_00026327_P4HA2	8.71628	7.21221	9.70459e-12	1.95885e-08	9.70459e-12	0.001	0.00399507
chr17:3914513_rs57625058	TCONS_00013687_ZZEF1	-3.20459	-7.21075	9.78863e-12	2.23346e-08	9.78863e-12	0.001	0.00399507
chr17:3914513_rs57625058	TCONS_00013686_ZZEF1	3.20459	7.21075	9.78863e-12	2.23346e-08	9.78863e-12	0.001	0.00399507
chr4:119364791_rs188210692	TCONS_00024992_SEC24D	6.1459	7.20773	9.96399e-12	1.56916e-08	9.96399e-12	0.001	0.00399507
chr17:39917325_rs4606765	TCONS_00014088_JUP	-2.13296	-7.1947	1.07587e-11	2.44361e-08	1.07587e-11	0.001	0.00399507
chr10:91162182_rs41284944	TCONS_00003972_IFIT3	-4.49073	-7.19447	1.0773e-11	1.23103e-08	1.0773e-11	0.001	0.00399507
chr17:19319015_rs1295329	TCONS_00013869_DL490867	-9.12033	-7.19214	1.09216e-11	2.47658e-08	1.09216e-11	0.001	0.00399507
chr2:37485215_rs2251879	TCONS_00017595_LOC100505876	1.74175	7.18211	1.15855e-11	3.82587e-08	1.15855e-11	0.001	0.00399507
chr2:37485215_rs2251879	TCONS_00017596_LOC100505876	-1.74175	-7.18211	1.15855e-11	3.82587e-08	1.15855e-11	0.001	0.00399507
chr12:97253607_rs703694	TCONS_00007291_NEDD1	-2.38355	-7.17177	1.23113e-11	2.66974e-08	1.23113e-11	0.001	0.00399507
chr22:38104609_rs62236744	TCONS_00021502_TRIOBP	3.20692	7.15591	1.35119e-11	2.58395e-08	1.35119e-11	0.001	0.00399507
chr22:38104609_rs62236744	TCONS_00021501_TRIOBP	-3.20692	-7.15591	1.35119e-11	2.58395e-08	1.35119e-11	0.001	0.00399507
chr4:8390859_rs13136987	TCONS_00024681_ACOX3	1.90613	7.15108	1.39007e-11	2.13183e-08	1.39007e-11	0.001	0.00399507
chr12:15760843_rs1477107	TCONS_00006856_PTPRO	-3.73029	-7.14784	1.41674e-11	3.052e-08	1.41674e-11	0.001	0.00399507
chr11:20379276_rs11025524	TCONS_00004928_HTATIP2	4.7747	7.12351	1.63366e-11	1.90413e-08	1.63366e-11	0.001	0.00399507
chr5:36256564_rs7716771	TCONS_00026076_RANBP3L	2.25849	7.12122	1.65569e-11	3.22226e-08	1.65569e-11	0.001	0.00399507
chr12:105444796_rs4128817	TCONS_00007358_KIAA1033	-3.01309	-7.11831	1.68411e-11	3.61552e-08	1.68411e-11	0.001	0.00399507
chr12:105444796_rs4128817	TCONS_00007356_KIAA1033	3.01309	7.11831	1.68411e-11	3.61552e-08	1.68411e-11	0.001	0.00399507
chr17:35956391_rs12944821	TCONS_00014043_SYNRG	-12.3928	-7.11273	1.73995e-11	3.83573e-08	1.73995e-11	0.001	0.00399507
chr2:238860554_rs11887040	TCONS_00018687_UBE2F-SCLY	0.48137	7.10931	1.77511e-11	5.71656e-08	1.77511e-11	0.001	0.00399507
chr2:238860554_rs11887040	TCONS_00018692_UBE2F-SCLY	-0.48137	-7.10931	1.77511e-11	5.71656e-08	1.77511e-11	0.001	0.00399507
chr5:132202411_rs30177	TCONS_00025737_UQCRQ	-3.94254	-7.10408	1.83019e-11	3.52652e-08	1.83019e-11	0.001	0.00399507
chr5:132202411_rs30177	TCONS_00025744_UQCRQ	3.94254	7.10408	1.83019e-11	3.52652e-08	1.83019e-11	0.001	0.00399507
chr17:56028392_rs12600414	TCONS_00014314_CUEDC1	-2.63616	-7.09885	1.88693e-11	4.14141e-08	1.88693e-11	0.001	0.00399507
chr12:69912050_rs12321119	TCONS_00037705_add_FRS2	9.02463	7.09367	1.9449e-11	4.14817e-08	1.9449e-11	0.001	0.00399507
chr9:114361659_rs41279067	TCONS_00032486_PTGR1	-9.29288	-7.09266	1.95631e-11	4.36887e-08	1.95631e-11	0.001	0.00399507
chr1:36509956_rs812106	TCONS_00001748_add_AGO3	-3.12175	-7.0752	2.16601e-11	4.15584e-08	2.16601e-11	0.001	0.00399507
chr1:222896220_rs73126803	TCONS_00001722_MIA3	3.80641	7.06224	2.33586e-11	4.46667e-08	2.33586e-11	0.001	0.00399507
chr9:73308368_rs12348503	TCONS_00174938_add_TRPM3	-2.98601	-7.04739	2.54673e-11	5.63319e-08	2.54673e-11	0.001	0.00399507
chr4:2806727_rs421714	TCONS_00024106_SH3BP2	4.65891	7.0459	2.56885e-11	3.6267e-08	2.56885e-11	0.001	0.00399507
chr1:47066383_rs11211319	TCONS_00002339_MKNK1	-1.35815	-7.04225	2.62389e-11	5.00652e-08	2.62389e-11	0.001	0.00399507
chr10:30717561_rs303432	TCONS_00003659_MAP3K8	-1.82615	-7.03904	2.67327e-11	2.8431e-08	2.67327e-11	0.001	0.00399507
chr5:112009554_rs74838492	TCONS_00026283_REEP5	-2.61351	-7.03699	2.70542e-11	5.10448e-08	2.70542e-11	0.001	0.00399507
chr5:112009554_rs74838492	TCONS_00026282_REEP5	2.61351	7.03699	2.70542e-11	5.10448e-08	2.70542e-11	0.001	0.00399507
chr3:134205231_rs1863911	TCONS_00023850_ANAPC13	3.32805	7.02451	2.90861e-11	4.85844e-08	2.90861e-11	0.001	0.00399507
chr3:134205231_rs1863911	TCONS_00023849_ANAPC13	-3.32805	-7.02451	2.90861e-11	4.85844e-08	2.90861e-11	0.001	0.00399507
chr15:90455940_rs1256836	TCONS_00011089_C15orf38-AP3S2	4.01324	7.00921	3.17864e-11	7.06066e-08	3.17864e-11	0.001	0.00399507
chr15:90455940_rs1256836	TCONS_00011090_C15orf38-AP3S2	-4.01324	-7.00921	3.17864e-11	7.06066e-08	3.17864e-11	0.001	0.00399507
chr10:91011681_rs1332327	TCONS_00004537_LIPA	-1.56902	-6.99929	3.36667e-11	3.50728e-08	3.36667e-11	0.001	0.00399507
chr6:31192509_rs114687281	TCONS_00027027_MICA	-14.1109	-6.99591	3.4332e-11	1.78866e-08	3.4332e-11	0.001	0.00399507
chr19:39734220_rs4803217	TCONS_00016834_IFNL4	4.28401	6.99405	3.47037e-11	1.00333e-07	3.47037e-11	0.001	0.00399507
chr21:34896962_rs1804385	TCONS_00021172_GART	1.21163	6.99401	3.47108e-11	1.1675e-07	3.47108e-11	0.001	0.00399507
chr1:173876705_rs2759328	TCONS_00003034_GAS5	-15.506	-6.9778	3.81225e-11	7.14712e-08	3.81225e-11	0.001	0.00399507
chr3:17651757_rs9284837	TCONS_00023238_TBC1D5	-5.82016	-6.97532	3.86731e-11	6.39783e-08	3.86731e-11	0.001	0.00399507
chr10:50339287_rs35307207	TCONS_00004412_C10orf128	-3.26105	-6.97284	3.92324e-11	4.06023e-08	3.92324e-11	0.001	0.00399507
chr5:94255391_rs6877335	TCONS_00026248_MCTP1	-11.0123	-6.97052	3.97616e-11	7.35929e-08	3.97616e-11	0.001	0.00399507
chr2:53872803_rs10490465	TCONS_00017650_ERLEC1	2.86073	6.96764	4.04294e-11	1.23049e-07	4.04294e-11	0.001	0.00399507
chr2:53872803_rs10490465	TCONS_00017649_ERLEC1	-2.86073	-6.96764	4.04294e-11	1.23049e-07	4.04294e-11	0.001	0.00399507
chr16:70472713_rs62049031	TCONS_00011860_CLEC18C	-17.1292	-6.96055	4.21168e-11	1.66201e-07	4.21168e-11	0.001	0.00399507
chr1:159013044_rs3754459	TCONS_00001202_IFI16	3.98488	6.96042	4.21492e-11	7.8491e-08	4.21492e-11	0.001	0.00399507
chr1:159013044_rs3754459	TCONS_00001204_IFI16	-3.98488	-6.96042	4.21492e-11	7.8491e-08	4.21492e-11	0.001	0.00399507
chr2:47201099_rs6731862	TCONS_00017632_TTC7A	-3.8742	-6.96023	4.21954e-11	1.28281e-07	4.21954e-11	0.001	0.00399507
chr2:47201099_rs6731862	TCONS_00017633_TTC7A	3.8742	6.96023	4.21954e-11	1.28281e-07	4.21954e-11	0.001	0.00399507
chr3:119196334_rs3732419	TCONS_00022713_POGLUT1	-2.46963	-6.95551	4.3361e-11	7.14296e-08	4.3361e-11	0.001	0.00399507
chr12:9846521_rs7968401	TCONS_00006819_CLEC2D	-3.87437	-6.94372	4.64127e-11	9.52658e-08	4.64127e-11	0.001	0.00399507
chr1:47066383_rs11211319	TCONS_00002346_MKNK1	1.54601	6.94369	4.64199e-11	8.57712e-08	4.64199e-11	0.001	0.00399507
chr5:31514573_rs4291028	TCONS_00026060_DROSHA	5.78176	6.92865	5.06211e-11	9.29524e-08	5.06211e-11	0.001	0.00399507
chr5:150472094_rs7721683	TCONS_00026495_TNIP1	1.78337	6.91223	5.56336e-11	1.01947e-07	5.56336e-11	0.001	0.00399507
chr17:3619216_rs2567882	TCONS_00013673_P2RX5-TAX1BP3	8.50262	6.90686	5.73788e-11	1.19932e-07	5.73788e-11	0.001	0.00399507
chr5:68856679_rs2243524	TCONS_00025490_SMA4	-6.54708	-6.9067	5.74313e-11	1.05097e-07	5.74313e-11	0.001	0.00399507
chr6:32886487_rs114372586	TCONS_00028046_TAP2	-4.41338	-6.89348	6.19602e-11	3.09969e-08	6.19602e-11	0.001	0.00399507
chr6:32886487_rs114372586	TCONS_00028042_TAP2	4.41338	6.89348	6.19602e-11	3.09969e-08	6.19602e-11	0.001	0.00399507
chr6:31105147_rs149979052	TCONS_00026999_HLA-L	-12.1421	-6.88193	6.6205e-11	3.29501e-08	6.6205e-11	0.001	0.00399507
chr4:185396395_rs17075872	TCONS_00025218_IRF2	-1.70619	-6.87649	6.83006e-11	9.05079e-08	6.83006e-11	0.001	0.00399507
chr3:119280020_rs55916342	TCONS_00022722_ADPRH	5.35883	6.87416	6.92215e-11	1.09952e-07	6.92215e-11	0.001	0.00399507
chr5:150404311_rs8177433	TCONS_00026471_TNIP1	1.60993	6.86662	7.22764e-11	1.31319e-07	7.22764e-11	0.001	0.00399507
chr6:29688501_rs2517910	TCONS_00026910_HLA-G	-4.52099	-6.85144	7.88344e-11	3.88744e-08	7.88344e-11	0.001	0.00399507
chr12:69932544_rs11177708	TCONS_00037700_add_FRS2	-9.41156	-6.85008	7.94495e-11	1.58808e-07	7.94495e-11	0.001	0.00399507
chr1:207784968_rs3818361	TCONS_00001661_CR1	-8.86796	-6.84481	8.18782e-11	1.47114e-07	8.18782e-11	0.001	0.00399507
chr9:115941345_rs10817452	TCONS_00032503_FKBP15	2.53554	6.84463	8.19648e-11	1.70098e-07	8.19648e-11	0.001	0.00399507
chr9:116027892_rs10981710	TCONS_00032508_FKBP15	0.331712	6.84383	8.23407e-11	1.70809e-07	8.23407e-11	0.001	0.00399507
chr12:69958283_rs515533	TCONS_00037706_add_FRS2	-10.0389	-6.83256	8.78123e-11	1.74761e-07	8.78123e-11	0.001	0.00399507
chr16:89784992_rs57119673	TCONS_00064125_add_ZNF276	-4.43196	-6.81889	9.49346e-11	3.46566e-07	9.49346e-11	0.001	0.00399507
chr15:75903695_rs113859107	TCONS_00011003_SNUPN	-7.23967	-6.80722	1.01466e-10	2.08214e-07	1.01466e-10	0.001	0.00399507
chr7:106803963_rs257381	TCONS_00029232_HBP1	3.24596	6.79832	1.06743e-10	1.33676e-07	1.06743e-10	0.001	0.00399507
chr22:36545137_rs132642	TCONS_00021837_APOL3	1.37365	6.78834	1.12975e-10	1.90756e-07	1.12975e-10	0.001	0.00399507
chr7:6617247_rs11559147	TCONS_00028683_ZDHHC4	10.7306	6.7853	1.14947e-10	1.43229e-07	1.14947e-10	0.001	0.00399507
chr11:124016366_rs2282505	TCONS_00005714_VWA5A	2.85819	6.77815	1.19713e-10	1.26773e-07	1.19713e-10	0.001	0.00399507
chr11:124016366_rs2282505	TCONS_00005715_VWA5A	-2.85819	-6.77815	1.19713e-10	1.26773e-07	1.19713e-10	0.001	0.00399507
chr1:168251333_rs3767480	TCONS_00001375_TBX19	-0.85244	-6.77095	1.24711e-10	2.18862e-07	1.24711e-10	0.001	0.00399507
chr7:35668047_rs7810217	TCONS_00029683_HERPUD2	1.55627	6.76702	1.27526e-10	1.57963e-07	1.27526e-10	0.001	0.00399507
chr7:28724502_rs6965754	TCONS_00028753_CREB5	2.17199	6.75864	1.33736e-10	1.65138e-07	1.33736e-10	0.001	0.00399507
chr9:115941345_rs10817452	TCONS_00032506_FKBP15	-2.33181	-6.75182	1.39004e-10	2.82272e-07	1.39004e-10	0.001	0.00399507
chr7:80320633_rs7797401	TCONS_00029078_CD36	5.56365	6.74827	1.41832e-10	1.74428e-07	1.41832e-10	0.001	0.00399507
chr14:58723382_rs9323331	TCONS_00051723_add_C14orf37	8.89273	6.73359	1.54122e-10	2.19404e-07	1.54122e-10	0.001	0.00399507
chr17:2274989_rs61490447	TCONS_00012580_SGSM2	6.46823	6.7334	1.54295e-10	3.00357e-07	1.54295e-10	0.001	0.00399507
chr6:138218558_rs186278374	TCONS_00027558_TNFAIP3	-6.5359	-6.72608	1.60819e-10	7.57396e-08	1.60819e-10	0.001	0.00399507
chr16:25149206_rs9930827	TCONS_00011440_LCMT1	-6.51467	-6.71856	1.67795e-10	5.62307e-07	1.67795e-10	0.001	0.00399507
chr3:138057903_rs2054468	TCONS_00022841_MRAS	-6.00723	-6.70642	1.79704e-10	2.58741e-07	1.79704e-10	0.001	0.00399507
chr5:150472094_rs7721683	TCONS_00026498_TNIP1	-2.15154	-6.70354	1.82651e-10	3.21273e-07	1.82651e-10	0.001	0.00399507
chr11:88101618_rs7937947	TCONS_00006494_CTSC	1.35778	6.69842	1.8801e-10	1.96279e-07	1.8801e-10	0.001	0.00399507
chr11:88101618_rs7937947	TCONS_00006495_CTSC	-1.35778	-6.69842	1.8801e-10	1.96279e-07	1.8801e-10	0.001	0.00399507
chr7:115648914_rs12534795	TCONS_00030090_TFEC	-3.49409	-6.69787	1.88595e-10	2.26866e-07	1.88595e-10	0.001	0.00399507
chr16:30400725_rs8063632	TCONS_00012269_SEPT1	-13.5035	-6.69434	1.92386e-10	6.36285e-07	1.92386e-10	0.001	0.00399507
chr16:30400725_rs8063632	TCONS_00012271_SEPT1	13.5035	6.69434	1.92386e-10	6.36285e-07	1.92386e-10	0.001	0.00399507
chr6:31540784_rs1041981	TCONS_00027038_LTA	-7.09778	-6.69385	1.9292e-10	8.97769e-08	1.9292e-10	0.001	0.00399507
chr5:40718788_rs7726270	TCONS_00025403_PTGER4	1.37784	6.6925	1.94392e-10	3.40581e-07	1.94392e-10	0.001	0.00399507
chr12:10126249_rs7309256	TCONS_00006826_CLEC12A	-2.47637	-6.6892	1.98034e-10	3.78974e-07	1.98034e-10	0.001	0.00399507
chr1:110204650_rs11101981	TCONS_00000703_GSTM2	-7.36431	-6.68047	2.08023e-10	3.54161e-07	2.08023e-10	0.001	0.00399507
chr11:882406_rs61869681	TCONS_00005859_CHID1	5.57417	6.67478	2.14792e-10	2.22354e-07	2.14792e-10	0.001	0.00399507
chr11:85764875_rs497711	TCONS_00006482_PICALM	2.30199	6.65442	2.40852e-10	2.48513e-07	2.40852e-10	0.001	0.00399507
chr19:49459104_rs1805419	TCONS_00015899_BAX	2.04995	6.65291	2.429e-10	6.17339e-07	2.429e-10	0.001	0.00399507
chr19:49459104_rs1805419	TCONS_00015902_BAX	-2.04995	-6.65291	2.429e-10	6.17339e-07	2.429e-10	0.001	0.00399507
chr19:48611620_rs434371	TCONS_00017030_PLA2G4C	2.73414	6.64745	2.50465e-10	6.35849e-07	2.50465e-10	0.001	0.00399507
chr7:138741899_rs28526780	TCONS_00030197_ZC3HAV1	-2.1034	-6.64441	2.54784e-10	2.99611e-07	2.54784e-10	0.001	0.00399507
chr3:48487911_rs9881491	TCONS_00022440_ATRIP	6.63098	6.63184	2.73389e-10	3.77472e-07	2.73389e-10	0.001	0.00399507
chr1:206616101_rs11120291	TCONS_00001604_SRGAP2	-1.35098	-6.63111	2.74511e-10	4.57046e-07	2.74511e-10	0.001	0.00399507
chr14:94578162_rs2239644	TCONS_00009519_IFI27	2.15868	6.62708	2.80785e-10	3.90595e-07	2.80785e-10	0.001	0.00399507
chr12:109013956_rs73191242	TCONS_00008133_CORO1C	8.6518	6.62529	2.83618e-10	5.33397e-07	2.83618e-10	0.001	0.00399507
chr2:71618599_rs12478953	TCONS_00017726_ZNF638	3.28687	6.62495	2.84155e-10	7.50754e-07	2.84155e-10	0.001	0.00399507
chr6:86241894_rs4441928	TCONS_00028312_SNHG5	1.87942	6.61866	2.94343e-10	1.3276e-07	2.94343e-10	0.001	0.00399507
chr1:39940499_rs61779309	TCONS_00002284_PABPC4	-3.44553	-6.61857	2.94499e-10	4.88185e-07	2.94499e-10	0.001	0.00399507
chr10:129845903_rs7912703	TCONS_00004153_PTPRE	3.74991	6.61847	2.94657e-10	2.64109e-07	2.94657e-10	0.001	0.00399507
chr6:119684853_rs10457355	TCONS_00028413_MAN1A1	4.54336	6.61153	3.06326e-10	1.37869e-07	3.06326e-10	0.001	0.00399507
chr1:196674982_rs1048663	TCONS_00001540_CFH	4.87074	6.60665	3.14813e-10	5.19141e-07	3.14813e-10	0.001	0.00399507
chr1:196674982_rs1048663	TCONS_00001541_CFH	-4.87074	-6.60665	3.14813e-10	5.19141e-07	3.14813e-10	0.001	0.00399507
chr1:22970642_rs80083522	TCONS_00000202_C1QC	0.971379	6.59587	3.34358e-10	5.48752e-07	3.34358e-10	0.001	0.00399507
chr1:22970642_rs80083522	TCONS_00000203_C1QC	-0.971379	-6.59587	3.34358e-10	5.48752e-07	3.34358e-10	0.001	0.00399507
chr12:9810000_rs17805558	TCONS_00006816_CLEC2D	-5.18657	-6.5874	3.50567e-10	6.50407e-07	3.50567e-10	0.001	0.00399507
chr7:72282628_rs9768979	TCONS_00028976_SBDSP1	-12.2576	-6.57335	3.79164e-10	4.31214e-07	3.79164e-10	0.001	0.00399507
chr10:27151939_rs9645528	TCONS_00004305_ABI1	-3.46233	-6.56977	3.86804e-10	3.41558e-07	3.86804e-10	0.001	0.00399507
chr22:50945799_rs41281543	TCONS_00022032_LMF2	5.40968	6.56615	3.94672e-10	6.18452e-07	3.94672e-10	0.001	0.00399507
chr22:50945799_rs41281543	TCONS_00022031_LMF2	-5.40968	-6.56615	3.94672e-10	6.18452e-07	3.94672e-10	0.001	0.00399507
chr6:167363948_rs3798307	TCONS_00028560_RNASET2	-3.15986	-6.56434	3.98685e-10	1.76304e-07	3.98685e-10	0.001	0.00399507
chr6:167363948_rs3798307	TCONS_00028559_RNASET2	3.15986	6.56434	3.98685e-10	1.76304e-07	3.98685e-10	0.001	0.00399507
chr12:62720714_rs56309606	TCONS_00007205_USP15	-1.04845	-6.56276	4.02213e-10	7.40033e-07	4.02213e-10	0.001	0.00399507
chr22:29657604_rs2857466	TCONS_00021398_GAS2L1	-8.08298	-6.55457	4.2097e-10	6.55231e-07	4.2097e-10	0.001	0.00399507
chr1:111208867_rs2640483	TCONS_00002582_KCNA3	3.99171	6.55085	4.29772e-10	6.91599e-07	4.29772e-10	0.001	0.00399507
chr16:55600034_rs1502002	TCONS_00011726_LPCAT2	-5.56344	-6.54563	4.42438e-10	1.34059e-06	4.42438e-10	0.001	0.00399507
chr16:55600034_rs1502002	TCONS_00011728_LPCAT2	5.56344	6.54563	4.42438e-10	1.34059e-06	4.42438e-10	0.001	0.00399507
chr22:42933626_rs4822161	TCONS_00021978_RRP7B	17.3026	6.54281	4.49428e-10	6.96376e-07	4.49428e-10	0.001	0.00399507
chr17:78181132_rs6565646	TCONS_00072814_add_CARD14	-4.39973	-6.53716	4.63779e-10	8.41933e-07	4.63779e-10	0.001	0.00399507
chr16:28823755_rs4533290	TCONS_00061774_add_AK125489	11.0871	6.53179	4.7781e-10	1.43873e-06	4.7781e-10	0.001	0.00399507
chr16:28823755_rs4533290	TCONS_00061773_add_AK125489	-11.0871	-6.53179	4.7781e-10	1.43873e-06	4.7781e-10	0.001	0.00399507
chr19:47974578_rs830133	TCONS_00017006_NAPA	-1.82918	-6.52661	4.91755e-10	1.19905e-06	4.91755e-10	0.001	0.00399507
chr19:47974578_rs830133	TCONS_00017007_NAPA	1.82918	6.52661	4.91755e-10	1.19905e-06	4.91755e-10	0.001	0.00399507
chr11:20379276_rs11025524	TCONS_00004927_HTATIP2	-4.3988	-6.49838	5.75078e-10	5.62909e-07	5.75078e-10	0.001	0.00399507
chr1:47182483_rs3737729	TCONS_00002351_EFCAB14	2.60296	6.49724	5.78726e-10	9.12869e-07	5.78726e-10	0.001	0.00399507
chr13:44455005_rs41288329	TCONS_00008560_LACC1	-11.9895	-6.49212	5.95334e-10	1.30307e-06	5.95334e-10	0.001	0.00399507
chr12:10114814_rs1466086	TCONS_00006825_CLEC12A	-5.88398	-6.48616	6.15315e-10	1.09432e-06	6.15315e-10	0.001	0.00399507
chr12:58142854_rs2069506	TCONS_00007202_TSFM	6.99393	6.48051	6.34806e-10	1.12782e-06	6.34806e-10	0.001	0.00399507
chr11:33728614_rs831618	TCONS_00006000_CD59	-1.76739	-6.47492	6.54721e-10	6.36174e-07	6.54721e-10	0.001	0.00399507
chr5:53836031_rs2548645	TCONS_00025428_SNX18	7.49974	6.46792	6.80538e-10	1.12594e-06	6.80538e-10	0.001	0.00399507
chr5:53836031_rs2548645	TCONS_00025427_SNX18	-7.49974	-6.46792	6.80538e-10	1.12594e-06	6.80538e-10	0.001	0.00399507
chr6:138004667_rs586317	TCONS_00027556_TNFAIP3	-4.5155	-6.46602	6.87723e-10	2.94461e-07	6.87723e-10	0.001	0.00399507
chr9:34310357_rs10972047	TCONS_00031596_NUDT2	-21.1236	-6.46214	7.02608e-10	1.30528e-06	7.02608e-10	0.001	0.00399507
chr1:9319556_rs3765959	TCONS_00000070_H6PD	5.40576	6.45776	7.19795e-10	1.11912e-06	7.19795e-10	0.001	0.00399507
chr20:3508289_rs464425	TCONS_00019837_ATRN	6.22922	6.45593	7.2707e-10	7.55912e-07	7.2707e-10	0.001	0.00399507
chr4:2815256_rs422734	TCONS_00024105_SH3BP2	2.36076	6.45204	7.42839e-10	8.71527e-07	7.42839e-10	0.001	0.00399507
chr11:124095525_rs11219508	TCONS_00029451_add_OR8G1	3.74192	6.44712	7.63274e-10	7.37441e-07	7.63274e-10	0.001	0.00399507
chr2:24278841_rs7568163	TCONS_00018808_SF3B14	4.08472	6.44391	7.76863e-10	1.91386e-06	7.76863e-10	0.001	0.00399507
chr2:24278841_rs7568163	TCONS_00018806_SF3B14	-4.08472	-6.44391	7.76863e-10	1.91386e-06	7.76863e-10	0.001	0.00399507
chr12:15760843_rs1477107	TCONS_00006857_PTPRO	3.36661	6.44206	7.84833e-10	1.37411e-06	7.84833e-10	0.001	0.00399507
chr16:57146291_rs12597697	TCONS_00011748_CPNE2	5.10482	6.43358	8.22314e-10	2.38157e-06	8.22314e-10	0.001	0.00399507
chr2:191520845_rs2293765	TCONS_00018274_NAB1	-5.24873	-6.41403	9.15635e-10	2.23225e-06	9.15635e-10	0.001	0.00399507
chr7:115648914_rs12534795	TCONS_00030089_TFEC	3.07539	6.41377	9.16905e-10	9.45353e-07	9.16905e-10	0.001	0.00399507
chr7:55781309_rs2961493	TCONS_00028917_CO9	-8.37623	-6.41223	9.24716e-10	9.52966e-07	9.24716e-10	0.001	0.00399507
chr7:55781309_rs2961493	TCONS_00028918_CO9	8.37623	6.41223	9.24716e-10	9.52966e-07	9.24716e-10	0.001	0.00399507
chr13:26782243_rs4770958	TCONS_00008774_RNF6	-4.57556	-6.41201	9.25814e-10	1.97412e-06	9.25814e-10	0.001	0.00399507
chr15:92716979_rs6496900	TCONS_00010591_SLCO3A1	-1.50702	-6.40803	9.46248e-10	1.65818e-06	9.46248e-10	0.001	0.00399507
chr15:92716979_rs6496900	TCONS_00010592_SLCO3A1	1.50702	6.40803	9.46248e-10	1.65818e-06	9.46248e-10	0.001	0.00399507
chr6:31472757_rs4713469	TCONS_00027029_MICB	-7.92537	-6.40684	9.52473e-10	3.98748e-07	9.52473e-10	0.001	0.00399507
chr9:86617265_rs1982151	TCONS_00032350_HNRNPK	-1.11478	-6.40445	9.65021e-10	1.76314e-06	9.65021e-10	0.001	0.00399507
chr9:86617265_rs1982151	TCONS_00032349_HNRNPK	1.11478	6.40445	9.65021e-10	1.76314e-06	9.65021e-10	0.001	0.00399507
chr11:33728614_rs831618	TCONS_00006006_CD59	1.73704	6.40061	9.85612e-10	9.4319e-07	9.85612e-10	0.001	0.00399507
chr4:119364791_rs188210692	TCONS_00024993_SEC24D	-6.1289	-6.38492	1.0741e-09	1.23998e-06	1.0741e-09	0.001	0.00399507
chr4:185319002_rs3775549	TCONS_00025216_IRF2	4.98491	6.38318	1.08435e-09	1.2507e-06	1.08435e-09	0.001	0.00399507
chr22:42936675_rs136974	TCONS_00021975_RRP7B	18.9278	6.37227	1.15104e-09	1.66573e-06	1.15104e-09	0.001	0.00399507
chr3:87996021_rs6802936	TCONS_00023658_CGGBP1	-3.44152	-6.37223	1.15132e-09	1.4426e-06	1.15132e-09	0.001	0.00399507
chr2:74377420_rs7596510	TCONS_00019123_MOB1A	0.760001	6.37207	1.15234e-09	2.75685e-06	1.15234e-09	0.001	0.00399507
chr2:74377420_rs7596510	TCONS_00019124_MOB1A	-0.760001	-6.37207	1.15234e-09	2.75685e-06	1.15234e-09	0.001	0.00399507
chr1:218475441_rs11118073	TCONS_00001708_RRP15	-19.326	-6.3716	1.15527e-09	1.74291e-06	1.15527e-09	0.001	0.00399507
chr1:218475441_rs11118073	TCONS_00001707_RRP15	19.326	6.3716	1.15527e-09	1.74291e-06	1.15527e-09	0.001	0.00399507
chr1:171497451_rs7531888	TCONS_00001407_PRRC2C	-0.87516	-6.36834	1.17607e-09	1.7725e-06	1.17607e-09	0.001	0.00399507
chr8:120583185_rs2305126	TCONS_00031251_ENPP2	-2.41937	-6.36053	1.22731e-09	1.75638e-06	1.22731e-09	0.001	0.00399507
chr6:31081065_rs2233959	TCONS_00026998_HLA-L	7.11549	6.354	1.27185e-09	5.21663e-07	1.27185e-09	0.001	0.00399507
chr11:63862882_rs11231694	TCONS_00005220_FKBP2	-5.95526	-6.33617	1.40178e-09	1.31975e-06	1.40178e-09	0.001	0.00399507
chr5:149780496_rs61290354	TCONS_00026465_CD74	2.53011	6.33266	1.42884e-09	2.26454e-06	1.42884e-09	0.001	0.00399507
chr5:149780496_rs61290354	TCONS_00026466_CD74	-2.53011	-6.33266	1.42884e-09	2.26454e-06	1.42884e-09	0.001	0.00399507
chr16:57146701_rs11862500	TCONS_00011753_CPNE2	-3.42548	-6.32914	1.45648e-09	3.90719e-06	1.45648e-09	0.001	0.00399507
chr9:170391_rs2998958	TCONS_00032093_CBWD1	-4.22427	-6.32136	1.51951e-09	2.64755e-06	1.51951e-09	0.001	0.00399507
chr7:128415860_rs3807128	TCONS_00029303_CALU	1.55026	6.31331	1.58752e-09	1.55506e-06	1.58752e-09	0.001	0.00399507
chr7:128415860_rs3807128	TCONS_00029299_CALU	-1.55026	-6.31331	1.58752e-09	1.55506e-06	1.58752e-09	0.001	0.00399507
chr12:104695009_rs4523760	TCONS_00007344_TXNRD1	-2.30348	-6.31263	1.59336e-09	2.66608e-06	1.59336e-09	0.001	0.00399507
chr3:10073183_rs28674015	TCONS_00023171_CIDEC	-1.8714	-6.31041	1.61273e-09	1.97764e-06	1.61273e-09	0.001	0.00399507
chr3:10073183_rs28674015	TCONS_00023174_CIDEC	1.8714	6.31041	1.61273e-09	1.97764e-06	1.61273e-09	0.001	0.00399507
chr19:55830940_rs7508682	TCONS_00017406_TMEM150B	2.01167	6.31	1.6163e-09	3.71796e-06	1.6163e-09	0.001	0.00399507
chr5:43147657_rs13185155	TCONS_00026112_AK056817	4.04665	6.3031	1.67804e-09	2.60924e-06	1.67804e-09	0.001	0.00399507
chr19:2037846_rs1064543	TCONS_00016374_MKNK2	-3.74991	-6.30294	1.67952e-09	3.85847e-06	1.67952e-09	0.001	0.00399507
chr7:35735537_rs896173	TCONS_00029680_HERPUD2	2.12551	6.29805	1.7247e-09	1.67792e-06	1.7247e-09	0.001	0.00399507
chr3:49299375_rs7638154	TCONS_00022450_WDR6	-14.3453	-6.28708	1.83049e-09	2.22527e-06	1.83049e-09	0.001	0.00399507
chr4:76830353_rs7688400	TCONS_00024833_NAAA	2.94079	6.28185	1.88308e-09	2.11663e-06	1.88308e-09	0.001	0.00399507
chr6:160211441_rs16890798	TCONS_00027672_MRPL18	9.04608	6.28171	1.88454e-09	7.51326e-07	1.88454e-09	0.001	0.00399507
chr2:153396412_rs2577179	TCONS_00018134_FMNL2	-2.27794	-6.2814	1.88771e-09	4.31582e-06	1.88771e-09	0.001	0.00399507
chr2:153396412_rs2577179	TCONS_00018130_FMNL2	2.27794	6.2814	1.88771e-09	4.31582e-06	1.88771e-09	0.001	0.00399507
chr6:31555130_rs2256965	TCONS_00027051_LST1	1.54795	6.27722	1.93088e-09	7.68543e-07	1.93088e-09	0.001	0.00399507
chr9:134467456_rs2296951	TCONS_00032691_RAPGEF1	7.31357	6.27331	1.9722e-09	3.38659e-06	1.9722e-09	0.001	0.00399507
chr11:125439492_rs11220131	TCONS_00005724_EI24	4.20828	6.27173	1.98919e-09	1.83376e-06	1.98919e-09	0.001	0.00399507
chr7:75162278_rs62477737	TCONS_00029860_NCF1C	-4.48668	-6.26353	2.07946e-09	1.98478e-06	2.07946e-09	0.001	0.00399507
chr2:101867189_rs12991475	TCONS_00019261_RNF149	1.542	6.25358	2.19438e-09	4.96161e-06	2.19438e-09	0.001	0.00399507
chr5:118676921_rs250304	TCONS_00025709_TNFAIP8	-1.52196	-6.23956	2.36699e-09	3.62882e-06	2.36699e-09	0.001	0.00399507
chr17:34171590_rs4251785	TCONS_00013013_TAF15	-10.0299	-6.23167	2.46981e-09	3.76183e-06	2.46981e-09	0.001	0.00399507
chr17:34816489_rs11651338	TCONS_00014030_TBC1D3G	9.75815	6.22948	2.49909e-09	3.79979e-06	2.49909e-09	0.001	0.00399507
chr12:39119222_rs58353662	TCONS_00007746_CPNE8	3.06607	6.22884	2.50779e-09	4.07389e-06	2.50779e-09	0.001	0.00399507
chr22:51028255_rs140513	TCONS_00022157_CHKB-CPT1B	-3.32216	-6.22766	2.52378e-09	3.44856e-06	2.52378e-09	0.001	0.00399507
chr5:55296538_rs6891628	TCONS_00026137_IL6ST	-3.11786	-6.22576	2.54977e-09	3.9001e-06	2.54977e-09	0.001	0.00399507
chr5:55296538_rs6891628	TCONS_00026138_IL6ST	3.11786	6.22576	2.54977e-09	3.9001e-06	2.54977e-09	0.001	0.00399507
chr12:57879092_rs10876988	TCONS_00007986_ARHGAP9	-6.72742	-6.22142	2.61011e-09	4.22937e-06	2.61011e-09	0.001	0.00399507
chr16:31363977_rs11574631	TCONS_00011628_ITGAX	2.49647	6.20803	2.80511e-09	6.94619e-06	2.80511e-09	0.001	0.00399507
chr1:40876113_rs2935888	TCONS_00000433_SMAP2	3.04053	6.20788	2.80742e-09	4.01535e-06	2.80742e-09	0.001	0.00399507
chr11:122750193_rs57837163	TCONS_00005700_CRTAM	-12.4862	-6.19871	2.94916e-09	2.63773e-06	2.94916e-09	0.001	0.00399507
chr11:122750193_rs57837163	TCONS_00005702_CRTAM	12.4862	6.19871	2.94916e-09	2.63773e-06	2.94916e-09	0.001	0.00399507
chr3:138067626_rs11713141	TCONS_00022842_MRAS	5.0281	6.19367	3.03022e-09	3.56496e-06	3.03022e-09	0.001	0.00399507
chr4:2815256_rs422734	TCONS_00024104_SH3BP2	3.04338	6.19286	3.04335e-09	3.31527e-06	3.04335e-09	0.001	0.00399507
chr19:17426130_rs55971152	TCONS_00015516_BABAM1	8.65506	6.18996	3.09116e-09	6.86133e-06	3.09116e-09	0.001	0.00399507
chr19:17426130_rs55971152	TCONS_00015515_BABAM1	-8.65506	-6.18996	3.09116e-09	6.86133e-06	3.09116e-09	0.001	0.00399507
chr3:14981262_rs6442490	TCONS_00023208_FGD5-AS1	2.61561	6.18624	3.15351e-09	3.69802e-06	3.15351e-09	0.001	0.00399507
chr17:34171590_rs4251785	TCONS_00013007_TAF15	10.4364	6.1806	3.25031e-09	4.84479e-06	3.25031e-09	0.001	0.00399507
chr20:257733_rs2277781	TCONS_00020243_C20orf96	-7.26175	-6.17606	3.33036e-09	3.08081e-06	3.33036e-09	0.001	0.00399507
chr20:257733_rs2277781	TCONS_00020244_C20orf96	7.26175	6.17606	3.33036e-09	3.08081e-06	3.33036e-09	0.001	0.00399507
chr18:3450455_rs238132	TCONS_00014782_TGIF1	3.18734	6.17241	3.39611e-09	9.10877e-06	3.39611e-09	0.001	0.00399507
chr10:28922106_rs61848527	TCONS_00003644_WAC	2.34317	6.16836	3.47069e-09	2.65719e-06	3.47069e-09	0.001	0.00399507
chr11:85764875_rs497711	TCONS_00006484_PICALM	-1.9167	-6.16489	3.53568e-09	3.13736e-06	3.53568e-09	0.001	0.00399507
chr11:64041817_rs11606014	TCONS_00006295_TRPT1	-11.0546	-6.15993	3.63087e-09	3.22054e-06	3.63087e-09	0.001	0.00399507
chr18:67601636_rs1823778	TCONS_00015077_CD226	-5.40027	-6.15755	3.67739e-09	9.83813e-06	3.67739e-09	0.001	0.00399507
chr10:29856448_rs10763724	TCONS_00004331_SVIL	4.63139	6.15598	3.70849e-09	2.82833e-06	3.70849e-09	0.001	0.00399507
chr22:26896891_rs3788401	TCONS_00021362_ASPHD2	-3.61168	-6.14913	3.84676e-09	5.11628e-06	3.84676e-09	0.001	0.00399507
chr2:175357758_rs138570670	TCONS_00019469_GPR155	-3.58765	-6.13922	4.05584e-09	8.77353e-06	4.05584e-09	0.001	0.00399507
chr1:111728610_rs3818797	TCONS_00002592_DRAM2	-8.46861	-6.1362	4.12181e-09	5.75373e-06	4.12181e-09	0.001	0.00399507
chr12:12225207_rs10845469	TCONS_00006834_ETV6	-3.82661	-6.13454	4.15841e-09	6.29999e-06	4.15841e-09	0.001	0.00399507
chr12:10249129_rs11053577	TCONS_00007670_CLEC1A	4.78202	6.1296	4.26957e-09	6.4352e-06	4.26957e-09	0.001	0.00399507
chr12:10249129_rs11053577	TCONS_00007671_CLEC1A	-4.78202	-6.1296	4.26957e-09	6.4352e-06	4.26957e-09	0.001	0.00399507
chr16:582668_rs112427909	TCONS_00011161_SOLH	-32.6166	-6.12826	4.30019e-09	9.91356e-06	4.30019e-09	0.001	0.00399507
chr16:582668_rs112427909	TCONS_00011162_SOLH	32.6166	6.12826	4.30019e-09	9.91356e-06	4.30019e-09	0.001	0.00399507
chr10:35533707_rs34233967	TCONS_00003671_CREM	-2.35632	-6.12445	4.38846e-09	3.32325e-06	4.38846e-09	0.001	0.00399507
chr19:39734220_rs4803217	TCONS_00016842_IFNL4	-3.89311	-6.12155	4.45688e-09	9.77168e-06	4.45688e-09	0.001	0.00399507
chr1:113247713_rs35221527	TCONS_00002611_RHOC	4.57017	6.11043	4.72867e-09	6.53362e-06	4.72867e-09	0.001	0.00399507
chr1:113247713_rs35221527	TCONS_00002610_RHOC	-4.57017	-6.11043	4.72867e-09	6.53362e-06	4.72867e-09	0.001	0.00399507
chr19:2037846_rs1064543	TCONS_00016376_MKNK2	3.11684	6.10823	4.78457e-09	1.04657e-05	4.78457e-09	0.001	0.00399507
chr12:3971635_rs7967785	TCONS_00007604_PARP11	-7.07586	-6.10236	4.93631e-09	7.18545e-06	4.93631e-09	0.001	0.00399507
chr6:24721584_rs1923186	TCONS_00027815_C6orf62	-1.07181	-6.09807	5.05013e-09	1.87439e-06	5.05013e-09	0.001	0.00399507
chr6:24721584_rs1923186	TCONS_00027813_C6orf62	1.07181	6.09807	5.05013e-09	1.87439e-06	5.05013e-09	0.001	0.00399507
chr2:113117451_rs145713961	TCONS_00017966_TTL	2.67187	6.09748	5.06592e-09	1.07905e-05	5.06592e-09	0.001	0.00399507
chr17:7472733_rs12939472	TCONS_00013773_SAT2	2.66616	6.09405	5.1592e-09	7.38997e-06	5.1592e-09	0.001	0.00399507
chr6:42841231_rs1150797	TCONS_00027317_RPL7L1	5.25404	6.0812	5.5234e-09	2.03587e-06	5.5234e-09	0.001	0.00399507
chr5:79700485_rs259048	TCONS_00025591_ZFYVE16	-8.07205	-6.07041	5.84866e-09	8.61589e-06	5.84866e-09	0.001	0.00399507
chr19:53122002_rs35068187	TCONS_00017277_ZNF83	9.27504	6.06936	5.8814e-09	1.27537e-05	5.8814e-09	0.001	0.00399507
chr1:236384402_rs1405623	TCONS_00014873_add_ERO1LB	0.284263	6.0552	6.33953e-09	8.60697e-06	6.33953e-09	0.001	0.00399507
chr19:10239943_rs35374357	TCONS_00016543_DNMT1	0.979439	6.05053	6.49799e-09	1.40234e-05	6.49799e-09	0.001	0.00399507
chr4:114682566_rs8175	TCONS_00024987_CAMK2D	-4.01559	-6.03911	6.90228e-09	6.9523e-06	6.90228e-09	0.001	0.00399507
chr10:18239619_rs526713	TCONS_00003598_MRC1	10.8573	6.02183	7.5613e-09	5.57535e-06	7.5613e-09	0.001	0.00399507
chr10:18239619_rs526713	TCONS_00003586_MRC1	-10.8573	-6.02183	7.5613e-09	5.57535e-06	7.5613e-09	0.001	0.00399507
chr9:79322720_rs680729	TCONS_00175028_add_PRUNE2	-5.54781	-6.0158	7.80542e-09	1.19807e-05	7.80542e-09	0.001	0.00399507
chr7:106799997_rs257376	TCONS_00029230_HBP1	-1.32607	-6.0124	7.94661e-09	6.5121e-06	7.94661e-09	0.001	0.00399507
chr17:74555106_rs4647885	TCONS_00013460_SNHG16	4.16815	6.01013	8.04226e-09	1.10913e-05	8.04226e-09	0.001	0.00399507
chr17:74555106_rs4647885	TCONS_00013461_SNHG16	-4.16815	-6.01013	8.04226e-09	1.10913e-05	8.04226e-09	0.001	0.00399507
chr3:36916351_rs4591457	TCONS_00023273_TRANK1	-1.10779	-6.00886	8.09613e-09	8.78166e-06	8.09613e-09	0.001	0.00399507
chr3:105549067_rs12632595	TCONS_00023685_CBLB	-10.6281	-6.00728	8.16379e-09	8.84671e-06	8.16379e-09	0.001	0.00399507
chr17:48756937_rs3785912	TCONS_00013295_ABCC3	3.5225	6.00581	8.22707e-09	1.13282e-05	8.22707e-09	0.001	0.00399507
chr17:48756937_rs3785912	TCONS_00013292_ABCC3	-3.5225	-6.00581	8.22707e-09	1.13282e-05	8.22707e-09	0.001	0.00399507
chr15:86105045_rs67253156	TCONS_00010524_AKAP13	3.01505	6.00431	8.29237e-09	1.19513e-05	8.29237e-09	0.001	0.00399507
chr10:27034247_rs7923912	TCONS_00004304_ABI1	2.1474	5.99973	8.49464e-09	6.23779e-06	8.49464e-09	0.001	0.00399507
chr2:102783977_rs4558602	TCONS_00017918_IL1R1	3.16677	5.99253	8.82243e-09	1.79477e-05	8.82243e-09	0.001	0.00399507
chr2:113948915_rs10469812	TCONS_00017993_LOC654433	-14.3136	-5.9865	9.1063e-09	1.84976e-05	9.1063e-09	0.001	0.00399507
chr12:123180061_rs1798219	TCONS_00008307_HCAR1	0.72548	5.98103	9.37138e-09	1.2984e-05	9.37138e-09	0.001	0.00399507
chr5:132306035_rs11951542	TCONS_00026340_AFF4	4.4869	5.97657	9.59339e-09	1.37758e-05	9.59339e-09	0.001	0.00399507
chr10:26977723_rs2448126	TCONS_00003619_PDSS1	2.98383	5.97469	9.68876e-09	7.07885e-06	9.68876e-09	0.001	0.00399507
chr19:53122511_rs10405302	TCONS_00017279_ZNF83	-5.77512	-5.97358	9.74521e-09	2.05596e-05	9.74521e-09	0.001	0.00399507
chr5:180259563_rs79222378	TCONS_00026030_LINC00847	-11.371	-5.96972	9.94426e-09	1.41882e-05	9.94426e-09	0.001	0.00399507
chr22:45570105_rs132887	TCONS_00021634_NUP50	6.42543	5.96374	1.02607e-08	1.24407e-05	1.02607e-08	0.001	0.00399507
chr22:45570105_rs132887	TCONS_00021635_NUP50	-6.42543	-5.96374	1.02607e-08	1.24407e-05	1.02607e-08	0.001	0.00399507
chr19:54788660_rs4493177	TCONS_00016056_LILRB1	-3.14131	-5.96192	1.0359e-08	2.18016e-05	1.0359e-08	0.001	0.00399507
chr17:33734716_rs112588740	TCONS_00014005_SLFN12	-4.07844	-5.9618	1.03659e-08	1.40421e-05	1.03659e-08	0.001	0.00399507
chr18:32353415_rs899830	TCONS_00014840_DTNA	3.25076	5.95667	1.06481e-08	2.69137e-05	1.06481e-08	0.001	0.00399507
chr18:32353415_rs899830	TCONS_00014839_DTNA	-3.25076	-5.95667	1.06481e-08	2.69137e-05	1.06481e-08	0.001	0.00399507
chr1:85463208_rs7519134	TCONS_00002469_MCOLN2	2.24903	5.95598	1.06865e-08	1.39551e-05	1.06865e-08	0.001	0.00399507
chr6:32977420_rs381218	TCONS_00028069_HLA-DOA	-3.98324	-5.9549	1.07471e-08	3.77014e-06	1.07471e-08	0.001	0.00399507
chr6:32977420_rs381218	TCONS_00028064_HLA-DOA	3.98324	5.9549	1.07471e-08	3.77014e-06	1.07471e-08	0.001	0.00399507
chr8:74887093_rs10113791	TCONS_00030629_TMEM70	2.90386	5.95112	1.09617e-08	1.40026e-05	1.09617e-08	0.001	0.00399507
chr8:74887093_rs10113791	TCONS_00030628_TMEM70	-2.90386	-5.95112	1.09617e-08	1.40026e-05	1.09617e-08	0.001	0.00399507
chr5:118623391_rs1504980	TCONS_00025704_TNFAIP8	-1.08102	-5.93661	1.18254e-08	1.6589e-05	1.18254e-08	0.001	0.00399507
chr7:98980659_rs11973460	TCONS_00029105_ARPC1B	1.51405	5.93654	1.18299e-08	9.1291e-06	1.18299e-08	0.001	0.00399507
chr19:39745058_rs73050457	TCONS_00016841_IFNL4	-1.43418	-5.93344	1.20231e-08	2.51631e-05	1.20231e-08	0.001	0.00399507
chr7:6462013_rs55695740	TCONS_00029605_DAGLB	-2.40452	-5.92698	1.24351e-08	9.54677e-06	1.24351e-08	0.001	0.00399507
chr7:6462013_rs55695740	TCONS_00029606_DAGLB	2.40452	5.92698	1.24351e-08	9.54677e-06	1.24351e-08	0.001	0.00399507
chr2:223411564_rs1436787	TCONS_00018582_SGPP2	-3.83793	-5.92381	1.26424e-08	2.48135e-05	1.26424e-08	0.001	0.00399507
chr11:59454885_rs80044955	TCONS_00006149_PATL1	2.96004	5.92362	1.2655e-08	1.03174e-05	1.2655e-08	0.001	0.00399507
chr8:8637429_rs560544	TCONS_00030886_MFHAS1	3.24864	5.91515	1.3226e-08	1.66938e-05	1.3226e-08	0.001	0.00399507
chr8:8637429_rs560544	TCONS_00030885_MFHAS1	-3.24864	-5.91515	1.3226e-08	1.66938e-05	1.3226e-08	0.001	0.00399507
chr12:50515765_rs11169275	TCONS_00006962_COX14	-6.1901	-5.90601	1.38707e-08	1.87749e-05	1.38707e-08	0.001	0.00399507
chr12:50515765_rs11169275	TCONS_00006963_COX14	6.1901	5.90601	1.38707e-08	1.87749e-05	1.38707e-08	0.001	0.00399507
chr6:111549961_rs76198205	TCONS_00028380_REV3L	3.86162	5.90072	1.42579e-08	4.89057e-06	1.42579e-08	0.001	0.00399507
chr16:31096876_rs4468641	TCONS_00011589_HSD3B7	-6.73422	-5.89927	1.43659e-08	2.95758e-05	1.43659e-08	0.001	0.00399507
chr12:58224040_rs4760333	TCONS_00008002_CYP27B1	4.83048	5.8848	1.54879e-08	2.07513e-05	1.54879e-08	0.001	0.00399507
chr19:50510450_rs12461698	TCONS_00017224_VRK3	-6.8993	-5.88321	1.56164e-08	3.2413e-05	1.56164e-08	0.001	0.00399507
chr19:50510450_rs12461698	TCONS_00017223_VRK3	6.8993	5.88321	1.56164e-08	3.2413e-05	1.56164e-08	0.001	0.00399507
chr10:115441142_rs72641340	TCONS_00004108_CASP7	4.85623	5.88043	1.58433e-08	1.11964e-05	1.58433e-08	0.001	0.00399507
chr10:115441142_rs72641340	TCONS_00004107_CASP7	-4.85623	-5.88043	1.58433e-08	1.11964e-05	1.58433e-08	0.001	0.00399507
chr4:15822462_rs72616179	TCONS_00024173_CD38	1.68027	5.87178	1.65709e-08	1.56393e-05	1.65709e-08	0.001	0.00399507
chr6:29695466_rs2735060	TCONS_00026924_HLA-F	-1.26572	-5.87063	1.66694e-08	5.64945e-06	1.66694e-08	0.001	0.00399507
chr9:265437_rs543300	TCONS_00031484_DOCK8	-1.73141	-5.87059	1.6673e-08	2.42432e-05	1.6673e-08	0.001	0.00399507
chr15:77292819_rs56175244	TCONS_00011011_ETFA	9.39006	5.86707	1.69802e-08	2.30667e-05	1.69802e-08	0.001	0.00399507
chr15:77292819_rs56175244	TCONS_00011014_ETFA	-9.39006	-5.86707	1.69802e-08	2.30667e-05	1.69802e-08	0.001	0.00399507
chr7:6882902_rs4724872	TCONS_00029609_CCZ1B	-4.39769	-5.86544	1.71238e-08	1.27651e-05	1.71238e-08	0.001	0.00399507
chr7:6882902_rs4724872	TCONS_00029608_CCZ1B	4.39769	5.86544	1.71238e-08	1.27651e-05	1.71238e-08	0.001	0.00399507
chr10:100105378_rs112671552	TCONS_00004583_HPS1	-1.8304	-5.86261	1.73768e-08	1.21885e-05	1.73768e-08	0.001	0.00399507
chr12:56390636_rs705702	TCONS_00007097_RAB5B	3.29858	5.84747	1.87931e-08	2.48503e-05	1.87931e-08	0.001	0.00399507
chr17:6660612_rs4796549	TCONS_00012668_XAF1	-2.5173	-5.84483	1.90518e-08	2.48262e-05	1.90518e-08	0.001	0.00399507
chr2:160484368_rs4665097	TCONS_00019411_BAZ2B	3.37598	5.84451	1.90825e-08	3.59967e-05	1.90825e-08	0.001	0.00399507
chr2:160484368_rs4665097	TCONS_00019407_BAZ2B	-3.37598	-5.84451	1.90825e-08	3.59967e-05	1.90825e-08	0.001	0.00399507
chr13:28177227_rs833087	TCONS_00008501_POLR1D	-1.80368	-5.84363	1.91697e-08	3.44647e-05	1.91697e-08	0.001	0.00399507
chr12:124423275_rs4930722	TCONS_00008330_CCDC92	-7.22019	-5.84081	1.94512e-08	2.5676e-05	1.94512e-08	0.001	0.00399507
chr12:124423275_rs4930722	TCONS_00008333_CCDC92	7.22019	5.84081	1.94512e-08	2.5676e-05	1.94512e-08	0.001	0.00399507
chr2:69664976_rs13416004	TCONS_00019061_NFU1	17.9757	5.84048	1.94843e-08	3.67041e-05	1.94843e-08	0.001	0.00399507
chr6:26383386_rs9461249	TCONS_00026883_BTN2A2	-7.14758	-5.8353	2.00127e-08	6.67763e-06	2.00127e-08	0.001	0.00399507
chr17:66517469_rs10468444	TCONS_00013414_PRKAR1A	-3.46221	-5.83388	2.01599e-08	2.61822e-05	2.01599e-08	0.001	0.00399507
chr7:48194260_rs7802128	TCONS_00028898_UPP1	-1.76345	-5.83322	2.02291e-08	1.48345e-05	2.02291e-08	0.001	0.00399507
chr17:33754873_rs7223625	TCONS_00014007_SLFN12	6.23054	5.83321	2.02294e-08	2.62627e-05	2.02294e-08	0.001	0.00399507
chr4:15822462_rs72616179	TCONS_00024170_CD38	-1.66501	-5.82791	2.0791e-08	1.93922e-05	2.0791e-08	0.001	0.00399507
chr1:47182483_rs3737729	TCONS_00002350_EFCAB14	-2.3231	-5.82321	2.13012e-08	2.65821e-05	2.13012e-08	0.001	0.00399507
chr1:9319556_rs3765959	TCONS_00000068_H6PD	5.59977	5.82209	2.14246e-08	2.67219e-05	2.14246e-08	0.001	0.00399507
chr12:4742447_rs10444481	TCONS_00006749_DYRK4	-11.4952	-5.81769	2.19153e-08	2.86154e-05	2.19153e-08	0.001	0.00399507
chr12:4742447_rs10444481	TCONS_00006750_DYRK4	11.4952	5.81769	2.19153e-08	2.86154e-05	2.19153e-08	0.001	0.00399507
chr7:99736059_rs11771139	TCONS_00029146_PILRA	-1.45417	-5.81769	2.19157e-08	1.58873e-05	2.19157e-08	0.001	0.00399507
chr7:99736059_rs11771139	TCONS_00029148_PILRA	1.45417	5.81769	2.19157e-08	1.58873e-05	2.19157e-08	0.001	0.00399507
chr12:104695009_rs4523760	TCONS_00007349_TXNRD1	2.04602	5.8074	2.31079e-08	2.99085e-05	2.31079e-08	0.001	0.00399507
chr22:40915718_rs5757976	TCONS_00021593_SGSM3	4.8981	5.80707	2.31473e-08	2.61465e-05	2.31473e-08	0.001	0.00399507
chr22:40915718_rs5757976	TCONS_00021594_SGSM3	-4.8981	-5.80707	2.31473e-08	2.61465e-05	2.31473e-08	0.001	0.00399507
chr15:86100820_rs12438650	TCONS_00010526_AKAP13	-3.09562	-5.80448	2.34579e-08	3.12914e-05	2.34579e-08	0.001	0.00399507
chr1:154205556_rs9943093	TCONS_00002803_C1orf43	-1.61387	-5.80217	2.3739e-08	2.93707e-05	2.3739e-08	0.001	0.00399507
chr1:221056216_rs1317189	TCONS_00001715_HLX	-1.36952	-5.79881	2.41521e-08	2.98009e-05	2.41521e-08	0.001	0.00399507
chr1:221056216_rs1317189	TCONS_00001717_HLX	1.36952	5.79881	2.41521e-08	2.98009e-05	2.41521e-08	0.001	0.00399507
chr16:11681042_rs17552324	TCONS_00012088_LITAF	-1.85155	-5.79538	2.45825e-08	4.83256e-05	2.45825e-08	0.001	0.00399507
chr16:11681042_rs17552324	TCONS_00012087_LITAF	1.85155	5.79538	2.45825e-08	4.83256e-05	2.45825e-08	0.001	0.00399507
chr1:232657647_rs35186494	TCONS_00003301_SIPA1L2	-15.6294	-5.79245	2.49554e-08	3.06559e-05	2.49554e-08	0.001	0.00399507
chr9:132666628_rs7044285	TCONS_00032663_FNBP1	-1.14765	-5.78978	2.52999e-08	3.5031e-05	2.52999e-08	0.001	0.00399507
chr9:132666628_rs7044285	TCONS_00032662_FNBP1	1.14765	5.78978	2.52999e-08	3.5031e-05	2.52999e-08	0.001	0.00399507
chr5:94252861_rs159349	TCONS_00026250_MCTP1	5.89165	5.78651	2.57285e-08	3.43966e-05	2.57285e-08	0.001	0.00399507
chr3:105549067_rs12632595	TCONS_00023688_CBLB	11.051	5.78444	2.60024e-08	2.5164e-05	2.60024e-08	0.001	0.00399507
chr7:23815520_rs10263759	TCONS_00029632_TRA2A	3.84499	5.77765	2.69249e-08	1.91787e-05	2.69249e-08	0.001	0.00399507
chr7:23815520_rs10263759	TCONS_00029626_TRA2A	-3.84499	-5.77765	2.69249e-08	1.91787e-05	2.69249e-08	0.001	0.00399507
chr20:57557272_rs151363	TCONS_00020177_NELFCD	-3.02057	-5.77742	2.69559e-08	2.25411e-05	2.69559e-08	0.001	0.00399507
chr15:55782708_rs73411030	TCONS_00010855_CCPG1	-2.65293	-5.77542	2.72337e-08	3.60326e-05	2.72337e-08	0.001	0.00399507
chr3:195587099_rs7619906	TCONS_00023137_SDHAP2	-13.6277	-5.77506	2.7285e-08	2.63387e-05	2.7285e-08	0.001	0.00399507
chr7:150037660_rs1047207	TCONS_00029435_LRRC61	-7.47838	-5.7658	2.86101e-08	2.02288e-05	2.86101e-08	0.001	0.00399507
chr9:21482089_rs10125074	TCONS_00032161_MIR31HG	3.33078	5.76487	2.87475e-08	3.92196e-05	2.87475e-08	0.001	0.00399507
chr3:50011540_rs11130229	TCONS_00022472_RBM6	-1.92923	-5.76243	2.91087e-08	2.78884e-05	2.91087e-08	0.001	0.00399507
chr4:142639645_rs2131412	TCONS_00024507_IL15	3.27599	5.76208	2.91605e-08	2.62749e-05	2.91605e-08	0.001	0.00399507
chr6:29698821_rs114050064	TCONS_00027849_TRIM31	4.54959	5.74946	3.11054e-08	1.00519e-05	3.11054e-08	0.001	0.00399507
chr2:85752474_rs60012532	TCONS_00017804_VAMP5	2.13804	5.74549	3.17431e-08	5.63639e-05	3.17431e-08	0.001	0.00399507
chr9:32448036_rs112937253	TCONS_00031569_ACO1	-0.348481	-5.74496	3.18286e-08	4.29637e-05	3.18286e-08	0.001	0.00399507
chr7:156471964_rs1990256	TCONS_00030333_LMBR1	1.60729	5.73965	3.27044e-08	2.28802e-05	3.27044e-08	0.001	0.00399507
chr7:156471964_rs1990256	TCONS_00030334_LMBR1	-1.60729	-5.73965	3.27044e-08	2.28802e-05	3.27044e-08	0.001	0.00399507
chr2:69664976_rs13416004	TCONS_00019056_NFU1	-17.6535	-5.73819	3.29488e-08	5.82399e-05	3.29488e-08	0.001	0.00399507
chr7:37886129_rs79817387	TCONS_00153824_add_NME8	10.2193	5.7341	3.36442e-08	2.35033e-05	3.36442e-08	0.001	0.00399507
chr21:32484078_rs7275720	TCONS_00021149_TIAM1	1.29567	5.73341	3.37633e-08	8.33275e-05	3.37633e-08	0.001	0.00399507
chr13:113534382_rs1278766	TCONS_00008715_ATP11A	-7.97521	-5.73309	3.38175e-08	5.87414e-05	3.38175e-08	0.001	0.00399507
chr8:42442208_rs2923401	TCONS_00030565_SMIM19	-3.94148	-5.72389	3.5442e-08	4.21181e-05	3.5442e-08	0.001	0.00399507
chr4:190904527_rs193224791	TCONS_00025247_LOC100288255	-44.1477	-5.7189	3.63554e-08	3.18954e-05	3.63554e-08	0.001	0.00399507
chr4:190904527_rs193224791	TCONS_00025248_LOC100288255	44.1477	5.7189	3.63554e-08	3.18954e-05	3.63554e-08	0.001	0.00399507
chr11:63877163_rs11231698	TCONS_00006298_TRPT1	-9.89652	-5.71826	3.64738e-08	2.71327e-05	3.64738e-08	0.001	0.00399507
chr19:30205448_rs1001434	TCONS_00016762_C19orf12	2.10146	5.71467	3.71459e-08	7.25747e-05	3.71459e-08	0.001	0.00399507
chr6:29634012_rs115538733	TCONS_00027845_AK097625	21.4632	5.70109	3.9804e-08	1.26219e-05	3.9804e-08	0.001	0.00399507
chr2:9547363_rs10929580	TCONS_00018754_ITGB1BP1	2.90479	5.69927	4.01728e-08	6.92905e-05	4.01728e-08	0.001	0.00399507
chr1:174357645_rs61828654	TCONS_00001415_RABGAP1L	-1.72254	-5.69853	4.03249e-08	4.72104e-05	4.03249e-08	0.001	0.00399507
chr13:33039231_rs2022381	TCONS_00008812_N4BP2L2	-3.01983	-5.69592	4.08626e-08	7.00891e-05	4.08626e-08	0.001	0.00399507
chr10:31171626_rs3006593	TCONS_00004347_ZNF438	-0.32265	-5.69563	4.09224e-08	2.70059e-05	4.09224e-08	0.001	0.00399507
chr7:87933459_rs4545016	TCONS_00029906_STEAP4	32.4188	5.68632	4.29043e-08	2.9424e-05	4.29043e-08	0.001	0.00399507
chr3:124732842_rs6438871	TCONS_00023785_HEG1	2.14538	5.68239	4.37663e-08	4.05401e-05	4.37663e-08	0.001	0.00399507
chr3:124732842_rs6438871	TCONS_00023788_HEG1	-2.14538	-5.68239	4.37663e-08	4.05401e-05	4.37663e-08	0.001	0.00399507
chr1:1660043_rs1546881	TCONS_00001904_SLC35E2B	4.51397	5.67391	4.56903e-08	5.29115e-05	4.56903e-08	0.001	0.00399507
chr3:122441843_rs10934614	TCONS_00022748_PARP14	1.86543	5.66733	4.72369e-08	4.34978e-05	4.72369e-08	0.001	0.00399507
chr6:31087310_rs9263672	TCONS_00027013_TCF19	13.8415	5.66338	4.81914e-08	1.5092e-05	4.81914e-08	0.001	0.00399507
chr6:31104952_rs3132560	TCONS_00027000_HLA-L	-6.33839	-5.66316	4.82455e-08	1.5107e-05	4.82455e-08	0.001	0.00399507
chr6:137959044_rs638173	TCONS_00027555_TNFAIP3	-1.04451	-5.65742	4.9666e-08	1.55004e-05	4.9666e-08	0.001	0.00399507
chr6:13788252_rs3757254	TCONS_00027777_MCUR1	-2.28299	-5.65721	4.97204e-08	1.55161e-05	4.97204e-08	0.001	0.00399507
chr6:13788252_rs3757254	TCONS_00027776_MCUR1	2.28299	5.65721	4.97204e-08	1.55161e-05	4.97204e-08	0.001	0.00399507
chr4:8368433_rs7809	TCONS_00024675_ACOX3	-1.29701	-5.65357	5.06439e-08	4.37189e-05	5.06439e-08	0.001	0.00399507
chr2:71036482_rs2287101	TCONS_00019094_CLEC4F	10.4741	5.65254	5.09061e-08	8.55179e-05	5.09061e-08	0.001	0.00399507
chr3:75828828_rs9843871	TCONS_00120197_add_LOC401074	6.82135	5.65218	5.10003e-08	4.66518e-05	5.10003e-08	0.001	0.00399507
chr22:50836982_rs9616935	TCONS_00022021_PLXNB2	-6.09969	-5.6445	5.30157e-08	5.5806e-05	5.30157e-08	0.001	0.00399507
chr2:128001681_rs12692064	TCONS_00019314_MAP3K2	6.1704	5.64207	5.36723e-08	8.96322e-05	5.36723e-08	0.001	0.00399507
chr17:62468575_rs140290142	TCONS_00014437_DDX5	2.592	5.63776	5.48499e-08	6.76203e-05	5.48499e-08	0.001	0.00399507
chr10:135064636_rs12764665	TCONS_00004737_ADAM8	3.32404	5.63722	5.49995e-08	3.54867e-05	5.49995e-08	0.001	0.00399507
chr10:135064636_rs12764665	TCONS_00004736_ADAM8	-3.32404	-5.63722	5.49995e-08	3.54867e-05	5.49995e-08	0.001	0.00399507
chr7:102364101_rs142413565	TCONS_00030029_RASA4	-2.17669	-5.63286	5.62221e-08	3.77775e-05	5.62221e-08	0.001	0.00399507
chr11:18310449_rs10766467	TCONS_00005974_HPS5	1.40312	5.63049	5.6899e-08	4.0742e-05	5.6899e-08	0.001	0.00399507
chr2:145271250_rs116497883	TCONS_00019360_ZEB2	1.0253	5.62847	5.74822e-08	9.50458e-05	5.74822e-08	0.001	0.00399507
chr12:107300000_rs10861672	TCONS_00007364_C12orf23	-7.76203	-5.62546	5.83587e-08	6.89789e-05	5.83587e-08	0.001	0.00399507
chr15:93524867_rs11637185	TCONS_00010603_CHD2	-1.65777	-5.62241	5.92631e-08	7.11013e-05	5.92631e-08	0.001	0.00399507
chr14:71628063_rs8018758	TCONS_00009387_PCNX	0.801733	5.6206	5.98051e-08	6.42223e-05	5.98051e-08	0.001	0.00399507
chr1:156184747_rs2540175	TCONS_00005363_add_SLC25A44	-8.25495	-5.61741	6.07741e-08	6.87633e-05	6.07741e-08	0.001	0.00399507
chr7:55607189_rs11768022	TCONS_00029806_VOPP1	3.67954	5.61686	6.09402e-08	4.07193e-05	6.09402e-08	0.001	0.00399507
chr1:145428400_rs6424377	TCONS_00000826_NBPF10	-2.07046	-5.61507	6.14912e-08	6.95057e-05	6.14912e-08	0.001	0.00399507
chr2:86071864_rs2280314	TCONS_00019176_ST3GAL5	3.00728	5.61393	6.18455e-08	0.00010132	6.18455e-08	0.001	0.00399507
chr2:86071864_rs2280314	TCONS_00019170_ST3GAL5	-3.00728	-5.61393	6.18455e-08	0.00010132	6.18455e-08	0.001	0.00399507
chr16:57023938_rs289747	TCONS_00011746_NLRC5	2.59147	5.60921	6.33323e-08	0.000113303	6.33323e-08	0.001	0.00399507
chr1:145385300_rs2782588	TCONS_00000821_NBPF9	-2.37638	-5.6053	6.45874e-08	7.27528e-05	6.45874e-08	0.001	0.00399507
chr1:145385300_rs2782588	TCONS_00000817_NBPF9	2.37638	5.6053	6.45874e-08	7.27528e-05	6.45874e-08	0.001	0.00399507
chr10:71905695_rs10999158	TCONS_00004459_SAR1A	-2.91597	-5.60508	6.466e-08	4.10033e-05	6.466e-08	0.001	0.00399507
chr8:120584160_rs745383	TCONS_00031250_ENPP2	1.74133	5.60353	6.51666e-08	7.34402e-05	6.51666e-08	0.001	0.00399507
chr17:80402045_rs67228117	TCONS_00014678_C17orf62	-2.55941	-5.60316	6.52873e-08	7.99226e-05	6.52873e-08	0.001	0.00399507
chr1:112028577_rs2275796	TCONS_00002606_ADORA3	7.96939	5.60206	6.56494e-08	7.38177e-05	6.56494e-08	0.001	0.00399507
chr14:91621154_rs10148571	TCONS_00009494_C14orf159	5.21533	5.6	6.63303e-08	7.11041e-05	6.63303e-08	0.001	0.00399507
chr12:58254015_rs4760172	TCONS_00008001_CYP27B1	-4.68072	-5.58464	7.16428e-08	8.28841e-05	7.16428e-08	0.001	0.00399507
chr16:29675928_rs1050881	TCONS_00011512_SPN	-3.0227	-5.58452	7.16874e-08	0.000125917	7.16874e-08	0.001	0.00399507
chr16:29675928_rs1050881	TCONS_00011517_SPN	3.0227	5.58452	7.16874e-08	0.000125917	7.16874e-08	0.001	0.00399507
chr15:59923814_rs7178050	TCONS_00010875_BNIP2	1.7269	5.57695	7.44573e-08	8.73971e-05	7.44573e-08	0.001	0.00399507
chr15:59923814_rs7178050	TCONS_00010874_BNIP2	-1.7269	-5.57695	7.44573e-08	8.73971e-05	7.44573e-08	0.001	0.00399507
chr1:222862825_rs113632994	TCONS_00001718_MIA3	1.24153	5.57085	7.67669e-08	8.51175e-05	7.67669e-08	0.001	0.00399507
chr2:86447376_rs2367205	TCONS_00017813_MRPL35	4.99611	5.56504	7.90291e-08	0.000125654	7.90291e-08	0.001	0.00399507
chr2:86447376_rs2367205	TCONS_00017814_MRPL35	-4.99611	-5.56504	7.90291e-08	0.000125654	7.90291e-08	0.001	0.00399507
chr8:72941733_rs3824150	TCONS_00167259_add_TRPA1	9.82988	5.556	8.26821e-08	9.08328e-05	8.26821e-08	0.001	0.00399507
chr11:59946302_rs598862	TCONS_00006177_MS4A6A	-7.83457	-5.55262	8.40855e-08	5.79933e-05	8.40855e-08	0.001	0.00399507
chr2:113990261_rs7421852	TCONS_00017994_LOC654433	4.53182	5.55226	8.42365e-08	0.000132928	8.42365e-08	0.001	0.00399507
chr17:4811026_rs57416551	TCONS_00012625_GP1BA	-20.7615	-5.55145	8.45787e-08	0.000102548	8.45787e-08	0.001	0.00399507
chr17:4811026_rs57416551	TCONS_00012626_GP1BA	20.7615	5.55145	8.45787e-08	0.000102548	8.45787e-08	0.001	0.00399507
chr16:28546865_rs75932386	TCONS_00012229_NPIPL1	8.13622	5.54608	8.68765e-08	0.000149871	8.68765e-08	0.001	0.00399507
chr7:100202219_rs56328569	TCONS_00030001_LRCH4	2.35526	5.54163	8.88274e-08	5.73652e-05	8.88274e-08	0.001	0.00399507
chr6:160193853_rs7759086	TCONS_00027674_MRPL18	-7.09608	-5.5415	8.88813e-08	2.66644e-05	8.88813e-08	0.001	0.00399507
chr7:65374027_rs62470893	TCONS_00029822_GUSB	-2.23577	-5.53501	9.18029e-08	5.91331e-05	9.18029e-08	0.001	0.00399507
chr7:65374027_rs62470893	TCONS_00029821_GUSB	2.23577	5.53501	9.18029e-08	5.91331e-05	9.18029e-08	0.001	0.00399507
chr19:52160765_rs73052830	TCONS_00017261_SIGLEC5	21.0782	5.53109	9.36152e-08	0.000174046	9.36152e-08	0.001	0.00399507
chr4:122062341_rs13110041	TCONS_00025001_TNIP3	1.48547	5.52826	9.49409e-08	7.74215e-05	9.49409e-08	0.001	0.00399507
chr20:49170157_rs6512654	TCONS_00020143_PTPN1	2.50125	5.5203	9.8779e-08	7.32016e-05	9.8779e-08	0.001	0.00399507
chr20:49170157_rs6512654	TCONS_00020144_PTPN1	-2.50125	-5.5203	9.8779e-08	7.32016e-05	9.8779e-08	0.001	0.00399507
chr7:75670851_rs4470976	TCONS_00029877_STYXL1	6.09547	5.52002	9.89157e-08	6.34771e-05	9.89157e-08	0.001	0.00399507
chr17:53209774_rs2787486	TCONS_00071597_add_STXBP4	-6.39263	-5.51509	1.01368e-07	0.000121412	1.01368e-07	0.001	0.00399507
chr19:58420699_rs3745133	TCONS_00092349_add_ZNF814	3.05181	5.51261	1.02623e-07	0.000188433	1.02623e-07	0.001	0.00399507
chr17:41173638_rs12938971	TCONS_00013157_TMEM106A	7.92404	5.51098	1.03461e-07	0.000123806	1.03461e-07	0.001	0.00399507
chr13:114529383_rs12868549	TCONS_00045920_add_GAS6-AS1	6.21325	5.51032	1.038e-07	0.000167432	1.038e-07	0.001	0.00399507
chr6:46726441_rs9395212	TCONS_00028235_PLA2G7	2.1798	5.50996	1.03983e-07	3.0819e-05	1.03983e-07	0.001	0.00399507
chr16:57146701_rs11862500	TCONS_00011752_CPNE2	-2.70154	-5.50869	1.04642e-07	0.000176337	1.04642e-07	0.001	0.00399507
chr7:142424782_rs4726571	TCONS_00029408_TCRBV2S1	-13.3056	-5.50635	1.05866e-07	6.74533e-05	1.05866e-07	0.001	0.00399507
chr19:36254702_rs10401156	TCONS_00016769_IGFLR1	2.8663	5.50367	1.07282e-07	0.000196315	1.07282e-07	0.001	0.00399507
chr4:142654084_rs10519613	TCONS_00024504_IL15	2.4376	5.49818	1.10244e-07	8.86403e-05	1.10244e-07	0.001	0.00399507
chr6:26361430_rs4712981	TCONS_00026879_BTN3A2	7.91807	5.49548	1.11726e-07	3.29429e-05	1.11726e-07	0.001	0.00399507
chr3:113779363_rs140657739	TCONS_00022704_QTRTD1	-11.8824	-5.49541	1.11767e-07	9.61165e-05	1.11767e-07	0.001	0.00399507
chr7:100083078_rs67040465	TCONS_00029988_TSC22D4	4.6368	5.49536	1.11793e-07	7.10074e-05	1.11793e-07	0.001	0.00399507
chr7:24902762_rs2285690	TCONS_00029635_OSBPL3	-5.01726	-5.4945	1.12274e-07	7.12789e-05	1.12274e-07	0.001	0.00399507
chr7:24902762_rs2285690	TCONS_00029636_OSBPL3	5.01726	5.4945	1.12274e-07	7.12789e-05	1.12274e-07	0.001	0.00399507
chr8:22376627_rs2469771	TCONS_00030449_SORBS3	6.77652	5.49093	1.14274e-07	0.000122339	1.14274e-07	0.001	0.00399507
chr5:132306035_rs11951542	TCONS_00026339_AFF4	-4.51736	-5.49049	1.14526e-07	0.000136253	1.14526e-07	0.001	0.00399507
chr1:166836115_rs10800271	TCONS_00001353_POGK	-1.98806	-5.48623	1.16969e-07	0.000124091	1.16969e-07	0.001	0.00399507
chr1:155260350_rs1052177	TCONS_00002855_FAM189B	-1.63656	-5.48286	1.18932e-07	0.000125949	1.18932e-07	0.001	0.00399507
chr1:155260350_rs1052177	TCONS_00002854_FAM189B	1.63656	5.48286	1.18932e-07	0.000125949	1.18932e-07	0.001	0.00399507
chr4:17557397_rs28444994	TCONS_00024179_MED28	3.55983	5.48004	1.20604e-07	9.62154e-05	1.20604e-07	0.001	0.00399507
chr4:17557397_rs28444994	TCONS_00024178_MED28	-3.55983	-5.48004	1.20604e-07	9.62154e-05	1.20604e-07	0.001	0.00399507
chr13:26807186_rs9553770	TCONS_00008776_RNF6	2.5625	5.47228	1.25324e-07	0.000200314	1.25324e-07	0.001	0.00399507
chr1:234739101_rs6586405	TCONS_00003311_IRF2BP2	1.52607	5.47125	1.25963e-07	0.000132644	1.25963e-07	0.001	0.00399507
chr22:36602779_rs5995255	TCONS_00021858_APOL4	7.98484	5.46766	1.28212e-07	0.0001267	1.28212e-07	0.001	0.00399507
chr6:117869286_rs11153674	TCONS_00028408_GOPC	11.6409	5.46608	1.29221e-07	3.77075e-05	1.29221e-07	0.001	0.00399507
chr22:38921084_rs5750617	TCONS_00021913_JOSD1	-4.72763	-5.46125	1.3234e-07	0.000130184	1.3234e-07	0.001	0.00399507
chr22:38921084_rs5750617	TCONS_00021911_JOSD1	4.72763	5.46125	1.3234e-07	0.000130184	1.3234e-07	0.001	0.00399507
chr9:117087254_rs10982155	TCONS_00031874_ORM1	-34.5674	-5.44505	1.43341e-07	0.000161066	1.43341e-07	0.001	0.00399507
chr9:117087254_rs10982155	TCONS_00031875_ORM1	34.5674	5.44505	1.43341e-07	0.000161066	1.43341e-07	0.001	0.00399507
chr2:45839700_rs7596942	TCONS_00018955_SRBD1	-2.72553	-5.44095	1.46265e-07	0.000219246	1.46265e-07	0.001	0.00399507
chr2:45839700_rs7596942	TCONS_00018957_SRBD1	2.72553	5.44095	1.46265e-07	0.000219246	1.46265e-07	0.001	0.00399507
chr17:43460891_rs114934705	TCONS_00014234_KANSL1	-4.39352	-5.43931	1.47445e-07	0.000172214	1.47445e-07	0.001	0.00399507
chr17:43460891_rs114934705	TCONS_00014230_KANSL1	4.39352	5.43931	1.47445e-07	0.000172214	1.47445e-07	0.001	0.00399507
chr14:94578162_rs2239644	TCONS_00009520_IFI27	1.742	5.43703	1.49114e-07	0.000155092	1.49114e-07	0.001	0.00399507
chr19:55178920_rs2569715	TCONS_00016157_LILRB4	-2.53804	-5.43682	1.49266e-07	0.000266365	1.49266e-07	0.001	0.00399507
chr5:79700485_rs259048	TCONS_00025592_ZFYVE16	8.68027	5.43357	1.51673e-07	0.000175301	1.51673e-07	0.001	0.00399507
chr19:10327968_rs12984113	TCONS_00016527_DNMT1	-2.68729	-5.43232	1.52607e-07	0.000271984	1.52607e-07	0.001	0.00399507
chr1:36509956_rs812106	TCONS_00001727_add_AGO3	1.56364	5.42844	1.55541e-07	0.000159904	1.55541e-07	0.001	0.00399507
chr1:145433242_rs10910816	TCONS_00000827_NBPF10	-2.46449	-5.42783	1.5601e-07	0.000160256	1.5601e-07	0.001	0.00399507
chr1:943968_rs13303313	TCONS_00001864_HES4	-2.61936	-5.42115	1.61211e-07	0.000164782	1.61211e-07	0.001	0.00399507
chr2:192590106_rs35250979	TCONS_00018290_NABP1	-2.07931	-5.41684	1.64658e-07	0.000244136	1.64658e-07	0.001	0.00399507
chr19:20809933_rs7247107	TCONS_00089404_add_ZNF626	8.04364	5.41422	1.66794e-07	0.000295588	1.66794e-07	0.001	0.00399507
chr16:25157449_rs277911	TCONS_00011438_LCMT1	5.4094	5.41031	1.70021e-07	0.000267183	1.70021e-07	0.001	0.00399507
chr1:167599533_rs3738220	TCONS_00001357_RCSD1	4.00886	5.41028	1.70049e-07	0.000172962	1.70049e-07	0.001	0.00399507
chr1:167599533_rs3738220	TCONS_00001358_RCSD1	-4.00886	-5.41028	1.70049e-07	0.000172962	1.70049e-07	0.001	0.00399507
chr18:72170006_rs34676212	TCONS_00014908_CNDP2	2.00556	5.41024	1.70081e-07	0.000344943	1.70081e-07	0.001	0.00399507
chr1:16040129_rs9728923	TCONS_00000154_PLEKHM2	1.48441	5.40198	1.77105e-07	0.000179371	1.77105e-07	0.001	0.00399507
chr1:16040129_rs9728923	TCONS_00000158_PLEKHM2	-1.48441	-5.40198	1.77105e-07	0.000179371	1.77105e-07	0.001	0.00399507
chr1:196996366_rs10922154	TCONS_00003110_DENND1B	-2.81742	-5.39686	1.81596e-07	0.000183478	1.81596e-07	0.001	0.00399507
chr2:119989070_rs838099	TCONS_00018019_STEAP3	-8.57073	-5.3912	1.867e-07	0.000273796	1.867e-07	0.001	0.00399507
chr2:119989070_rs838099	TCONS_00018018_STEAP3	8.57073	5.3912	1.867e-07	0.000273796	1.867e-07	0.001	0.00399507
chr15:81411712_rs2663934	TCONS_00010499_IL16	6.84121	5.38733	1.90266e-07	0.000197712	1.90266e-07	0.001	0.00399507
chr10:27039126_rs7078396	TCONS_00004309_ABI1	2.82992	5.38479	1.92637e-07	0.000113615	1.92637e-07	0.001	0.00399507
chr4:48342682_rs56089943	TCONS_00024238_SLAIN2	-5.05256	-5.3773	1.99821e-07	0.000153688	1.99821e-07	0.001	0.00399507
chr4:48342682_rs56089943	TCONS_00024239_SLAIN2	5.05256	5.3773	1.99821e-07	0.000153688	1.99821e-07	0.001	0.00399507
chr8:120557774_rs28639530	TCONS_00031257_ENPP2	-1.70861	-5.37252	2.04533e-07	0.00020372	2.04533e-07	0.001	0.00399507
chr20:3595061_rs2251694	TCONS_00019836_ATRN	4.26333	5.36837	2.08716e-07	0.000148003	2.08716e-07	0.001	0.00399507
chr14:74756539_rs3213499	TCONS_00009911_ABCD4	4.46004	5.36704	2.10072e-07	0.000213752	2.10072e-07	0.001	0.00399507
chr1:36537640_rs558120	TCONS_00001744_add_AGO3	1.54499	5.3609	2.16451e-07	0.000214772	2.16451e-07	0.001	0.00399507
chr2:231257336_rs55964110	TCONS_00018612_SP140L	-4.10387	-5.35918	2.18278e-07	0.000314659	2.18278e-07	0.001	0.00399507
chr7:23737795_rs5029444	TCONS_00153517_add_FAM221A	-4.4367	-5.3554	2.22327e-07	0.000132169	2.22327e-07	0.001	0.00399507
chr15:41547938_rs11856169	TCONS_00010755_NDUFAF1	-3.51188	-5.35522	2.22531e-07	0.000226551	2.22531e-07	0.001	0.00399507
chr15:41547938_rs11856169	TCONS_00010757_NDUFAF1	3.51188	5.35522	2.22531e-07	0.000226551	2.22531e-07	0.001	0.00399507
chr8:134530568_rs721590	TCONS_00030763_PHF20L1	6.46403	5.35432	2.23503e-07	0.000219907	2.23503e-07	0.001	0.00399507
chr1:155667102_rs12035524	TCONS_00001136_DAP3	-3.41282	-5.34922	2.29123e-07	0.000226301	2.29123e-07	0.001	0.00399507
chr1:155667102_rs12035524	TCONS_00001140_DAP3	3.41282	5.34922	2.29123e-07	0.000226301	2.29123e-07	0.001	0.00399507
chr2:55513117_rs11884753	TCONS_00018990_CCDC88A	3.79478	5.34659	2.32062e-07	0.000333401	2.32062e-07	0.001	0.00399507
chr2:142245_rs11891259	TCONS_00017451_ACP1	-5.94619	-5.34531	2.33511e-07	0.000335131	2.33511e-07	0.001	0.00399507
chr2:142245_rs11891259	TCONS_00017452_ACP1	5.94619	5.34531	2.33511e-07	0.000335131	2.33511e-07	0.001	0.00399507
chr9:86836590_rs11140449	TCONS_00032342_FRMD3	-5.0197	-5.34014	2.39462e-07	0.000255056	2.39462e-07	0.001	0.00399507
chr11:18312953_rs4757638	TCONS_00005982_HPS5	-1.50936	-5.32688	2.55378e-07	0.000164522	2.55378e-07	0.001	0.00399507
chr16:28561982_rs13331170	TCONS_00012231_NPIPL1	-3.08305	-5.32468	2.58119e-07	0.000388171	2.58119e-07	0.001	0.00399507
chr9:21471499_rs1412395	TCONS_00032159_MIR31HG	-2.34057	-5.32399	2.58983e-07	0.000265395	2.58983e-07	0.001	0.00399507
chr10:50290518_rs68065270	TCONS_00004411_C10orf128	2.70436	5.32394	2.59042e-07	0.000150231	2.59042e-07	0.001	0.00399507
chr4:86123798_rs78536034	TCONS_00024910_WDFY3	-15.1122	-5.32319	2.59987e-07	0.000192041	2.59987e-07	0.001	0.00399507
chr5:70307464_rs4976210	TCONS_00026174_GUSBP3	-10.3077	-5.31753	2.67218e-07	0.000296914	2.67218e-07	0.001	0.00399507
chr10:105043289_rs1163087	TCONS_00004660_USMG5	-1.43298	-5.31617	2.68981e-07	0.00015566	2.68981e-07	0.001	0.00399507
chr10:105043289_rs1163087	TCONS_00004657_USMG5	1.43298	5.31617	2.68981e-07	0.00015566	2.68981e-07	0.001	0.00399507
chr3:119279928_rs112384456	TCONS_00022723_ADPRH	-5.72384	-5.31196	2.74524e-07	0.00022044	2.74524e-07	0.001	0.00399507
chr15:65194942_rs6494502	TCONS_00055103_add_ANKDD1A	1.58491	5.31006	2.77052e-07	0.000274566	2.77052e-07	0.001	0.00399507
chr6:31002301_rs115227920	TCONS_00027856_TRIM26	-15.6148	-5.30399	2.85308e-07	7.89296e-05	2.85308e-07	0.001	0.00399507
chr5:70307464_rs4976210	TCONS_00026175_GUSBP3	9.9961	5.27879	3.22214e-07	0.000353469	3.22214e-07	0.001	0.00399507
chr7:1478972_rs10253769	TCONS_00157561_add_MICALL2	-2.46498	-5.27711	3.24832e-07	0.000185877	3.24832e-07	0.001	0.00399507
chr7:1478972_rs10253769	TCONS_00157574_add_MICALL2	2.46498	5.27711	3.24832e-07	0.000185877	3.24832e-07	0.001	0.00399507
chr17:6660612_rs4796549	TCONS_00012674_XAF1	2.13835	5.27711	3.24834e-07	0.000355855	3.24834e-07	0.001	0.00399507
chr14:23284904_rs28364570	TCONS_00009686_SLC7A7	4.59767	5.26939	3.37139e-07	0.000333268	3.37139e-07	0.001	0.00399507
chr1:15480286_rs7530108	TCONS_00000144_TMEM51	3.46918	5.26593	3.42803e-07	0.00032484	3.42803e-07	0.001	0.00399507
chr1:2513055_rs4486391	TCONS_00000039_TNFRSF14	1.25962	5.24144	3.85574e-07	0.000361939	3.85574e-07	0.001	0.00399507
chr1:169367356_rs16862133	TCONS_00001386_BLZF1	1.77534	5.23388	3.99811e-07	0.000373887	3.99811e-07	0.001	0.00399507
chr13:43464131_rs9533291	TCONS_00008851_EPSTI1	-0.741809	-5.22489	4.17394e-07	0.000611586	4.17394e-07	0.001	0.00399507
chr19:55145481_rs2081658	TCONS_00016058_LILRB1	4.98256	5.22391	4.19353e-07	0.000700077	4.19353e-07	0.001	0.00399507
chr13:77522290_rs9530612	TCONS_00008670_IRG1	-2.77541	-5.22157	4.24058e-07	0.000620981	4.24058e-07	0.001	0.00399507
chr7:120656628_rs6973457	TCONS_00029280_ING3	1.45004	5.22137	4.24475e-07	0.000238143	4.24475e-07	0.001	0.00399507
chr7:120656628_rs6973457	TCONS_00029281_ING3	-1.45004	-5.22137	4.24475e-07	0.000238143	4.24475e-07	0.001	0.00399507
chr6:108355183_rs2187913	TCONS_00028347_OSTM1	-2.08521	-5.21777	4.31846e-07	0.00011563	4.31846e-07	0.001	0.00399507
chr6:108355183_rs2187913	TCONS_00028348_OSTM1	2.08521	5.21777	4.31846e-07	0.00011563	4.31846e-07	0.001	0.00399507
chr3:50371432_rs2236947	TCONS_00023441_HYAL3	4.97907	5.20978	4.48637e-07	0.000339569	4.48637e-07	0.001	0.00399507
chr3:50371432_rs2236947	TCONS_00023442_HYAL3	-4.97907	-5.20978	4.48637e-07	0.000339569	4.48637e-07	0.001	0.00399507
chr7:30540399_rs38410	TCONS_00029667_GGCT	3.12076	5.20923	4.49809e-07	0.000251538	4.49809e-07	0.001	0.00399507
chr7:30540399_rs38410	TCONS_00029668_GGCT	-3.12076	-5.20923	4.49809e-07	0.000251538	4.49809e-07	0.001	0.00399507
chr7:110737149_rs2301733	TCONS_00029247_LRRN3	-13.6257	-5.20606	4.56685e-07	0.000255209	4.56685e-07	0.001	0.00399507
chr22:50642793_rs4838814	TCONS_00021670_SELO	2.10407	5.20576	4.57337e-07	0.000393264	4.57337e-07	0.001	0.00399507
chr16:67001159_rs67483828	TCONS_00011794_CBFB	-7.15704	-5.20542	4.58066e-07	0.000650898	4.58066e-07	0.001	0.00399507
chr22:36058248_rs5755837	TCONS_00021439_APOL6	-1.9526	-5.2045	4.60087e-07	0.000395105	4.60087e-07	0.001	0.00399507
chr22:36058248_rs5755837	TCONS_00021438_APOL6	1.9526	5.2045	4.60087e-07	0.000395105	4.60087e-07	0.001	0.00399507
chr10:3202682_rs9423709	TCONS_00004182_PITRM1	-3.28579	-5.20017	4.6968e-07	0.000263293	4.6968e-07	0.001	0.00399507
chr10:3202682_rs9423709	TCONS_00004186_PITRM1	3.28579	5.20017	4.6968e-07	0.000263293	4.6968e-07	0.001	0.00399507
chr1:16129320_rs2013019	TCONS_00000162_SPEN	-3.27892	-5.19914	4.71994e-07	0.000434367	4.71994e-07	0.001	0.00399507
chr7:148699922_rs6464928	TCONS_00030283_PDIA4	-1.43276	-5.19514	4.8108e-07	0.000267707	4.8108e-07	0.001	0.00399507
chr7:148699922_rs6464928	TCONS_00030282_PDIA4	1.43276	5.19514	4.8108e-07	0.000267707	4.8108e-07	0.001	0.00399507
chr12:51433276_rs55679918	TCONS_00007837_TFCP2	3.43154	5.19365	4.84513e-07	0.000456108	4.84513e-07	0.001	0.00399507
chr17:5326162_rs2189336	TCONS_00012640_RABEP1	-5.99734	-5.19132	4.89907e-07	0.000517897	4.89907e-07	0.001	0.00399507
chr7:150499647_rs726647	TCONS_00030295_TMEM176B	-1.74299	-5.17731	5.23674e-07	0.000289202	5.23674e-07	0.001	0.00399507
chr7:150499647_rs726647	TCONS_00030294_TMEM176B	1.74299	5.17731	5.23674e-07	0.000289202	5.23674e-07	0.001	0.00399507
chr7:28724502_rs6965754	TCONS_00028752_CREB5	3.78713	5.17298	5.34565e-07	0.000294756	5.34565e-07	0.001	0.00399507
chr15:59466489_rs58124311	TCONS_00055003_add_LDHAL6B	8.52511	5.16761	5.4837e-07	0.00050255	5.4837e-07	0.001	0.00399507
chr1:179895764_rs474258	TCONS_00003063_TOR1AIP2	1.36735	5.16637	5.51601e-07	0.000500314	5.51601e-07	0.001	0.00399507
chr1:179895764_rs474258	TCONS_00003065_TOR1AIP2	-1.36735	-5.16637	5.51601e-07	0.000500314	5.51601e-07	0.001	0.00399507
chr14:104017793_rs12893668	TCONS_00009593_KLC1	0.728127	5.16566	5.5347e-07	0.00052945	5.5347e-07	0.001	0.00399507
chr11:59454885_rs80044955	TCONS_00006164_PATL1	-3.20712	-5.16079	5.66398e-07	0.000346521	5.66398e-07	0.001	0.00399507
chr17:38446564_rs2077464	TCONS_00013104_RARA	3.91917	5.1549	5.82455e-07	0.000607808	5.82455e-07	0.001	0.00399507
chr17:38446564_rs2077464	TCONS_00013105_RARA	-3.91917	-5.1549	5.82455e-07	0.000607808	5.82455e-07	0.001	0.00399507
chr6:31329506_rs9266301	TCONS_00027014_TCF19	-59.2181	-5.15221	5.89921e-07	0.00015243	5.89921e-07	0.001	0.00399507
chr18:77182877_rs61583665	TCONS_00014918_NFATC1	-2.86976	-5.15173	5.91261e-07	0.00104436	5.91261e-07	0.001	0.00399507
chr19:52130925_rs8108074	TCONS_00017256_SIGLEC5	14.1503	5.14691	6.04903e-07	0.000987492	6.04903e-07	0.001	0.00399507
chr5:154716424_rs183629	TCONS_00025896_LARP1	-4.39555	-5.14527	6.09615e-07	0.000639374	6.09615e-07	0.001	0.00399507
chr5:154716424_rs183629	TCONS_00025898_LARP1	4.39555	5.14527	6.09615e-07	0.000639374	6.09615e-07	0.001	0.00399507
chr13:20290126_rs7327482	TCONS_00008754_PSPC1	1.53524	5.12999	6.55294e-07	0.000905748	6.55294e-07	0.001	0.00399507
chr11:65351364_rs10160596	TCONS_00005288_EHBP1L1	1.00396	5.12895	6.58509e-07	0.000399011	6.58509e-07	0.001	0.00399507
chr8:17089788_rs77250415	TCONS_00030907_CNOT7	4.29124	5.1279	6.61795e-07	0.000588426	6.61795e-07	0.001	0.00399507
chr8:17089788_rs77250415	TCONS_00030906_CNOT7	-4.29124	-5.1279	6.61795e-07	0.000588426	6.61795e-07	0.001	0.00399507
chr10:35478115_rs12098283	TCONS_00003677_CREM	1.83197	5.1268	6.65232e-07	0.000365118	6.65232e-07	0.001	0.00399507
chr12:124128424_rs10773021	TCONS_00007545_GTF2H3	8.31465	5.12525	6.70122e-07	0.000607855	6.70122e-07	0.001	0.00399507
chr1:197595569_rs4316387	TCONS_00003106_DENND1B	-2.75617	-5.12382	6.74631e-07	0.000598797	6.74631e-07	0.001	0.00399507
chr11:104898513_rs530537	TCONS_00006554_CASP1	2.00143	5.12205	6.80308e-07	0.000411919	6.80308e-07	0.001	0.00399507
chr3:48204768_rs13099560	TCONS_00022423_ZNF589	-5.29323	-5.11726	6.9583e-07	0.0005051	6.9583e-07	0.001	0.00399507
chr17:8594532_rs7208581	TCONS_00012807_RANGRF	-6.27179	-5.11327	7.09059e-07	0.000726442	7.09059e-07	0.001	0.00399507
chr17:8594532_rs7208581	TCONS_00012808_RANGRF	6.27179	5.11327	7.09059e-07	0.000726442	7.09059e-07	0.001	0.00399507
chr6:29711334_rs116268068	TCONS_00027848_TRIM31	-3.53874	-5.11295	7.10122e-07	0.000180291	7.10122e-07	0.001	0.00399507
chr6:154590432_rs7766597	TCONS_00028521_IPCEF1	5.55736	5.10411	7.40283e-07	0.000187125	7.40283e-07	0.001	0.00399507
chr12:12694295_rs11054965	TCONS_00007695_DUSP16	-7.96927	-5.10247	7.46011e-07	0.000657853	7.46011e-07	0.001	0.00399507
chr12:12694295_rs11054965	TCONS_00007696_DUSP16	7.96927	5.10247	7.46011e-07	0.000657853	7.46011e-07	0.001	0.00399507
chr5:102325692_rs12656561	TCONS_00025671_PAM	-2.89787	-5.09994	7.54954e-07	0.000780333	7.54954e-07	0.001	0.00399507
chr1:220157017_rs2789793	TCONS_00003227_EPRS	3.51993	5.09972	7.55726e-07	0.00066518	7.55726e-07	0.001	0.00399507
chr1:220157017_rs2789793	TCONS_00003228_EPRS	-3.51993	-5.09972	7.55726e-07	0.00066518	7.55726e-07	0.001	0.00399507
chr18:2979489_rs635703	TCONS_00014941_LPIN2	2.91222	5.09444	7.74719e-07	0.00136042	7.74719e-07	0.001	0.00399507
chr3:170582888_rs13063927	TCONS_00023932_RPL22L1	-3.54266	-5.09442	7.74798e-07	0.000555002	7.74798e-07	0.001	0.00399507
chr8:144643169_rs1545536	TCONS_00030794_GSDMD	2.7285	5.09407	7.76061e-07	0.00068401	7.76061e-07	0.001	0.00399507
chr14:50065717_rs2281836	TCONS_00009224_LRR1	3.71571	5.0926	7.81445e-07	0.00072906	7.81445e-07	0.001	0.00399507
chr14:50065717_rs2281836	TCONS_00009225_LRR1	-3.71571	-5.0926	7.81445e-07	0.00072906	7.81445e-07	0.001	0.00399507
chr17:6907407_rs142757654	TCONS_00012704_RNASEK-C17orf49	-3.18982	-5.09247	7.81921e-07	0.000793146	7.81921e-07	0.001	0.00399507
chr15:40581164_rs3743138	TCONS_00010722_PLCB2	4.7316	5.09101	7.87313e-07	0.000683196	7.87313e-07	0.001	0.00399507
chr6:109654221_rs12524502	TCONS_00028352_CD164	8.03718	5.09027	7.90038e-07	0.000198399	7.90038e-07	0.001	0.00399507
chr6:109654221_rs12524502	TCONS_00028351_CD164	-8.03718	-5.09027	7.90038e-07	0.000198399	7.90038e-07	0.001	0.00399507
chr9:21319644_rs113092321	TCONS_00032139_IFNA14	0.655808	5.09016	7.90466e-07	0.000696845	7.90466e-07	0.001	0.00399507
chr2:31462373_rs3769631	TCONS_00018872_MEMO1	-1.61289	-5.08593	8.06313e-07	0.00102462	8.06313e-07	0.001	0.00399507
chr6:160212268_rs4709371	TCONS_00027671_MRPL18	-3.06207	-5.07944	8.31256e-07	0.00020801	8.31256e-07	0.001	0.00399507
chr9:127059114_rs80292333	TCONS_00031912_NEK6	5.92593	5.07833	8.35566e-07	0.000733311	8.35566e-07	0.001	0.00399507
chr9:127059114_rs80292333	TCONS_00031913_NEK6	-5.92593	-5.07833	8.35566e-07	0.000733311	8.35566e-07	0.001	0.00399507
chr12:56957985_rs7133264	TCONS_00007146_RBMS2	-1.26081	-5.07667	8.42118e-07	0.000731892	8.42118e-07	0.001	0.00399507
chr1:206622996_rs2483061	TCONS_00001607_SRGAP2	1.10869	5.07665	8.42188e-07	0.000734812	8.42188e-07	0.001	0.00399507
chr9:108037717_rs328012	TCONS_00031822_SLC44A1	-1.97888	-5.07564	8.46161e-07	0.000741081	8.46161e-07	0.001	0.00399507
chr16:51265410_rs6500371	TCONS_00011707_CYLD	-1.61555	-5.06806	8.76759e-07	0.00109938	8.76759e-07	0.001	0.00399507
chr10:26985438_rs2448116	TCONS_00003623_PDSS1	-3.31306	-5.05923	9.13737e-07	0.000490502	9.13737e-07	0.001	0.00399507
chr11:625085_rs58688157	TCONS_00005824_IRF7	0.996119	5.0568	9.24162e-07	0.000549886	9.24162e-07	0.001	0.00399507
chr16:11543265_rs56094199	TCONS_00065172_add_AK126539	2.59543	5.05338	9.39072e-07	0.00116841	9.39072e-07	0.001	0.00399507
chr7:75135243_rs1167809	TCONS_00029047_GTF2I	-2.13338	-5.04609	9.71574e-07	0.000505991	9.71574e-07	0.001	0.00399507
chr2:97599618_rs7574488	TCONS_00017834_NCAPH	11.0386	5.0447	9.7787e-07	0.00121567	9.7787e-07	0.001	0.00399507
chr7:48107291_rs1581416	TCONS_00028896_UPP1	-0.7607	-5.04397	9.81207e-07	0.000510532	9.81207e-07	0.001	0.00399507
chr1:16154437_rs6676406	TCONS_00000160_SPEN	6.47506	5.03044	1.04511e-06	0.000897502	1.04511e-06	0.001	0.00399507
chr15:63517347_rs12593078	TCONS_00010337_RAB8B	-2.87785	-5.02945	1.04991e-06	0.000864756	1.04991e-06	0.001	0.00399507
chr19:40796857_rs8110038	TCONS_00015758_PLD3	-3.53275	-5.02881	1.05308e-06	0.00162555	1.05308e-06	0.001	0.00399507
chr19:40796857_rs8110038	TCONS_00015746_PLD3	3.53275	5.02881	1.05308e-06	0.00162555	1.05308e-06	0.001	0.00399507
chr7:128201782_rs62483311	TCONS_00029293_FLJ45340	-4.96659	-5.02624	1.06575e-06	0.000549786	1.06575e-06	0.001	0.00399507
chr7:128201782_rs62483311	TCONS_00029291_FLJ45340	4.96659	5.02624	1.06575e-06	0.000549786	1.06575e-06	0.001	0.00399507
chr14:35604892_rs2010648	TCONS_00009211_FAM177A1	-0.518134	-5.02315	1.08114e-06	0.000986659	1.08114e-06	0.001	0.00399507
chr14:35604892_rs2010648	TCONS_00009209_FAM177A1	0.518134	5.02315	1.08114e-06	0.000986659	1.08114e-06	0.001	0.00399507
chr2:58478179_rs13411119	TCONS_00017662_VRK2	1.01415	5.02287	1.08259e-06	0.00133012	1.08259e-06	0.001	0.00399507
chr17:27464016_rs1388175	TCONS_00013949_MYO18A	-1.99694	-5.01318	1.13243e-06	0.00111577	1.13243e-06	0.001	0.00399507
chr19:10135284_rs2431820	TCONS_00088263_add_ANGPTL6	-12.6284	-5.01091	1.14444e-06	0.00175054	1.14444e-06	0.001	0.00399507
chr19:58420699_rs3745133	TCONS_00092331_add_ZNF814	-2.83784	-5.01056	1.14627e-06	0.00175311	1.14627e-06	0.001	0.00399507
chr20:33601601_rs6119559	TCONS_00020654_TRPC4AP	2.02055	5.00237	1.1907e-06	0.000740346	1.1907e-06	0.001	0.00399507
chr20:33601601_rs6119559	TCONS_00020653_TRPC4AP	-2.02055	-5.00237	1.1907e-06	0.000740346	1.1907e-06	0.001	0.00399507
chr13:113530725_rs4907467	TCONS_00008717_ATP11A	-5.9806	-5.00026	1.20239e-06	0.00149123	1.20239e-06	0.001	0.00399507
chr14:50480717_rs12101059	TCONS_00051485_add_LOC100506499	2.253	4.99678	1.22197e-06	0.00110221	1.22197e-06	0.001	0.00399507
chr5:43522247_rs139880611	TCONS_00026126_PAIP1	-1.59389	-4.99348	1.2408e-06	0.00123732	1.2408e-06	0.001	0.00399507
chr7:7492217_rs10486165	TCONS_00028695_MIOS	13.3386	4.979	1.32673e-06	0.000661435	1.32673e-06	0.001	0.00399507
chr6:111655530_rs465969	TCONS_00028382_REV3L	-6.63987	-4.97637	1.34296e-06	0.000322079	1.34296e-06	0.001	0.00399507
chr5:110853370_rs12523626	TCONS_00026273_STARD4	3.35865	4.97589	1.34593e-06	0.00133058	1.34593e-06	0.001	0.00399507
chr19:41227106_rs7251246	TCONS_00090198_add_C19orf54	12.2224	4.97086	1.37758e-06	0.00207483	1.37758e-06	0.001	0.00399507
chr10:74783082_rs11000491	TCONS_00004473_P4HA1	2.80752	4.96908	1.38893e-06	0.000723256	1.38893e-06	0.001	0.00399507
chr10:74783082_rs11000491	TCONS_00004472_P4HA1	-2.80752	-4.96908	1.38893e-06	0.000723256	1.38893e-06	0.001	0.00399507
chr5:177585822_rs140096215	TCONS_00141432_add_CLK4	-8.62292	-4.96325	1.4268e-06	0.00139439	1.4268e-06	0.001	0.00399507
chr7:75622811_rs6952753	TCONS_00029876_STYXL1	5.76327	4.94838	1.52798e-06	0.00074853	1.52798e-06	0.001	0.00399507
chr17:73801154_rs9900933	TCONS_00013443_UNK	1.21746	4.93567	1.61991e-06	0.00152496	1.61991e-06	0.001	0.00399507
chr6:116742144_rs6568940	TCONS_00027490_DSE	-4.01304	-4.93256	1.64322e-06	0.000385902	1.64322e-06	0.001	0.00399507
chr11:72409260_rs7105818	TCONS_00006408_ARAP1	-1.7715	-4.92543	1.69782e-06	0.000960335	1.69782e-06	0.001	0.00399507
chr7:66136019_rs1796213	TCONS_00028952_CCT6P1	-3.46599	-4.92404	1.7087e-06	0.000828233	1.7087e-06	0.001	0.00399507
chr9:21339969_rs12237982	TCONS_00032137_IFNA14	1.20876	4.9213	1.73026e-06	0.00141083	1.73026e-06	0.001	0.00399507
chr2:113986881_rs35836064	TCONS_00101826_add_PAX8	-2.45606	-4.90458	1.86787e-06	0.00216055	1.86787e-06	0.001	0.00399507
chr2:37989441_rs4670772	TCONS_00018933_SRSF7	3.4228	4.90176	1.89213e-06	0.00218337	1.89213e-06	0.001	0.00399507
chr2:198250213_rs59757315	TCONS_00018311_PLCL1	-2.45034	-4.9014	1.89528e-06	0.00218608	1.89528e-06	0.001	0.00399507
chr20:29889092_rs6061149	TCONS_00019956_FRG1B	-6.7109	-4.894	1.96036e-06	0.00117537	1.96036e-06	0.001	0.00399507
chr4:106670558_rs10017111	TCONS_00024972_INTS12	-4.86045	-4.89091	1.98824e-06	0.00113976	1.98824e-06	0.001	0.00399507
chr4:106670558_rs10017111	TCONS_00024970_INTS12	4.86045	4.89091	1.98824e-06	0.00113976	1.98824e-06	0.001	0.00399507
chr3:50011540_rs11130229	TCONS_00022474_RBM6	1.38751	4.88135	2.07677e-06	0.00133856	2.07677e-06	0.001	0.00399507
chr6:152508601_rs2813521	TCONS_00028512_SYNE1	-7.39877	-4.87609	2.12713e-06	0.000488496	2.12713e-06	0.001	0.00399507
chr6:117875854_rs9489220	TCONS_00028407_GOPC	-10.9927	-4.86994	2.1875e-06	0.000501063	2.1875e-06	0.001	0.00399507
chr9:21184361_rs191089008	TCONS_00032138_IFNA14	-14.8265	-4.85757	2.31397e-06	0.00184695	2.31397e-06	0.001	0.00399507
chr2:114170620_rs72611923	TCONS_00018002_CBWD2	2.81916	4.84923	2.40327e-06	0.00267199	2.40327e-06	0.001	0.00399507
chr2:114170620_rs72611923	TCONS_00018003_CBWD2	-2.81916	-4.84923	2.40327e-06	0.00267199	2.40327e-06	0.001	0.00399507
chr5:40688059_rs10055925	TCONS_00025398_PTGER4	0.773478	4.84454	2.45484e-06	0.00219543	2.45484e-06	0.001	0.00399507
chr19:35093681_rs1270260	TCONS_00084101_add_ZNF181	7.53486	4.83979	2.50829e-06	0.00359367	2.50829e-06	0.001	0.00399507
chr16:15685342_rs9928590	TCONS_00011364_NDE1	3.01816	4.83517	2.56124e-06	0.00278377	2.56124e-06	0.001	0.00399507
chr17:34343077_rs1719206	TCONS_00014015_CCL15-CCL14	-4.72161	-4.83259	2.59126e-06	0.00233866	2.59126e-06	0.001	0.00399507
chr7:99977582_rs73401443	TCONS_00029987_TSC22D4	-3.61577	-4.8316	2.60292e-06	0.00121532	2.60292e-06	0.001	0.00399507
chr17:27453301_rs923638	TCONS_00013943_MYO18A	3.16078	4.83121	2.60754e-06	0.00235122	2.60754e-06	0.001	0.00399507
chr17:74434003_rs1000821	TCONS_00013455_SPHK1	-3.71732	-4.7992	3.01253e-06	0.00268138	3.01253e-06	0.001	0.00399507
chr8:101281271_rs1660324	TCONS_00165014_add_SPAG1	-4.08914	-4.7898	3.14261e-06	0.00246427	3.14261e-06	0.001	0.00399507
chr1:154661369_rs34693607	TCONS_00002804_C1orf43	-2.53118	-4.78958	3.1457e-06	0.00240103	3.1457e-06	0.001	0.00399507
chr17:44808360_rs35937770	TCONS_00075808_add_ARL17A	-3.53472	-4.78876	3.1573e-06	0.00279348	3.1573e-06	0.001	0.00399507
chr8:90962041_rs12680903	TCONS_00031131_NBN	1.44867	4.78164	3.25989e-06	0.00254262	3.25989e-06	0.001	0.00399507
chr1:775426_rs2905037	TCONS_00008104_add_LOC100133331	-9.51236	-4.76782	3.46833e-06	0.00261281	3.46833e-06	0.001	0.00399507
chr14:103588515_rs2282037	TCONS_00009573_TNFAIP2	-2.43272	-4.75077	3.74303e-06	0.00305122	3.74303e-06	0.001	0.00399507
chr14:103588515_rs2282037	TCONS_00009576_TNFAIP2	2.43272	4.75077	3.74303e-06	0.00305122	3.74303e-06	0.001	0.00399507
chr2:65723290_rs11884967	TCONS_00019044_SPRED2	2.84749	4.72829	4.13779e-06	0.00430826	4.13779e-06	0.001	0.00399507
chr1:198672299_rs16843742	TCONS_00001550_PTPRC	-2.37053	-4.70023	4.68685e-06	0.00341472	4.68685e-06	0.001	0.00399507
chr1:198672299_rs16843742	TCONS_00001551_PTPRC	2.37053	4.70023	4.68685e-06	0.00341472	4.68685e-06	0.001	0.00399507
chr8:42389184_rs61580661	TCONS_00030564_SMIM19	6.41318	4.64972	5.85738e-06	0.00426189	5.85738e-06	0.001	0.00399507
chr2:97595330_rs72811670	TCONS_00017833_NCAPH	-16.5142	-4.60138	7.2385e-06	0.00700295	7.2385e-06	0.001	0.00399507
chr3:48940875_rs55674449	TCONS_00022446_ARIH2	-3.84173	-4.51559	1.04968e-05	0.00577685	1.04968e-05	0.001	0.00399507
chr20:29893501_rs6061162	TCONS_00019954_FRG1B	7.73427	4.42963	1.51538e-05	0.00751719	1.51538e-05	0.001	0.00399507
chr9:71031650_rs598148	TCONS_00032296_CBWD5	-6.14426	-4.35007	2.11865e-05	0.0128915	2.11865e-05	0.001	0.00399507
chr9:71177110_rs4745107	TCONS_00032298_CBWD5	4.46737	4.23383	3.42865e-05	0.0192285	3.42865e-05	0.001	0.00399507
chr15:60691031_rs28550540	TCONS_00010878_ANXA2	1.18459	5.8891	1.51457e-08	2.0766e-05	1.51457e-08	0.002	0.00752224
chr15:60691031_rs28550540	TCONS_00010879_ANXA2	-1.18459	-5.8891	1.51457e-08	2.0766e-05	1.51457e-08	0.002	0.00752224
chr1:158182504_rs440153	TCONS_00001162_CD1A	-4.35644	-5.84433	1.91003e-08	2.39514e-05	1.91003e-08	0.002	0.00752224
chr1:158182504_rs440153	TCONS_00001163_CD1A	4.35644	5.84433	1.91003e-08	2.39514e-05	1.91003e-08	0.002	0.00752224
chr19:51608555_rs12462533	TCONS_00017233_VSIG10L	6.81406	5.66107	4.87583e-08	9.34035e-05	4.87583e-08	0.002	0.00752224
chr11:12271266_rs3794077	TCONS_00004896_MICAL2	7.25452	5.50992	1.04005e-07	7.06591e-05	1.04005e-07	0.002	0.00752224
chr1:243501047_rs2636319	TCONS_00001832_SDCCAG8	-1.80579	-5.44039	1.46669e-07	0.000151797	1.46669e-07	0.002	0.00752224
chr1:243501047_rs2636319	TCONS_00001833_SDCCAG8	1.80579	5.44039	1.46669e-07	0.000151797	1.46669e-07	0.002	0.00752224
chr11:68408289_rs882979	TCONS_00028037_add_LRP5	4.75143	5.43439	1.51057e-07	9.98861e-05	1.51057e-07	0.002	0.00752224
chr20:3688853_rs4813639	TCONS_00020322_SIGLEC1	4.05402	5.41211	1.68523e-07	0.000120764	1.68523e-07	0.002	0.00752224
chr20:3688853_rs4813639	TCONS_00020380_SIGLEC1	-4.05402	-5.41211	1.68523e-07	0.000120764	1.68523e-07	0.002	0.00752224
chr7:155093042_rs9768378	TCONS_00029526_INSIG1	2.14414	5.27846	3.2273e-07	0.000184832	3.2273e-07	0.002	0.00752224
chr3:133144795_rs184014247	TCONS_00022805_CDV3	-4.58528	-5.21785	4.31675e-07	0.000327558	4.31675e-07	0.002	0.00752224
chr20:2173217_rs6113167	TCONS_00106490_add_EBF4	-8.48685	-5.1955	4.80252e-07	0.000321244	4.80252e-07	0.002	0.00752224
chr9:114323463_rs180804440	TCONS_00032483_PTGR1	13.29	5.17833	5.21156e-07	0.000481464	5.21156e-07	0.002	0.00752224
chr14:21971729_rs2242526	TCONS_00009093_TOX4	2.54222	5.17312	5.34217e-07	0.000513104	5.34217e-07	0.002	0.00752224
chr14:21971729_rs2242526	TCONS_00009092_TOX4	-2.54222	-5.17312	5.34217e-07	0.000513104	5.34217e-07	0.002	0.00752224
chr20:34369596_rs6119649	TCONS_00020680_CPNE1	-3.84067	-5.17088	5.39927e-07	0.00035633	5.39927e-07	0.002	0.00752224
chr6:3021866_rs10223660	TCONS_00026777_NQO2	14.8388	5.16038	5.67511e-07	0.000147188	5.67511e-07	0.002	0.00752224
chr19:46277230_rs7258468	TCONS_00016961_DMPK	-10.7464	-5.12888	6.58716e-07	0.00106931	6.58716e-07	0.002	0.00752224
chr4:140112938_rs16998435	TCONS_00025011_ELF2	-3.92902	-5.12417	6.73525e-07	0.000449701	6.73525e-07	0.002	0.00752224
chr13:44434836_rs7995955	TCONS_00008563_LACC1	-6.08898	-5.09727	7.64494e-07	0.00103405	7.64494e-07	0.002	0.00752224
chr16:88034806_rs145106547	TCONS_00011943_BANP	-26.6944	-5.0822	8.20565e-07	0.0010427	8.20565e-07	0.002	0.00752224
chr11:5719228_rs10838549	TCONS_00004837_TRIM22	0.59389	5.06781	8.77781e-07	0.000524216	8.77781e-07	0.002	0.00752224
chr11:5719228_rs10838549	TCONS_00004832_TRIM22	-0.59389	-5.06781	8.77781e-07	0.000524216	8.77781e-07	0.002	0.00752224
chr15:83550040_rs1256434	TCONS_00011057_HOMER2	-1.90196	-5.05728	9.22117e-07	0.000775359	9.22117e-07	0.002	0.00752224
chr14:21772457_rs113186054	TCONS_00009659_HNRNPC	1.26689	5.05119	9.48717e-07	0.000877444	9.48717e-07	0.002	0.00752224
chr13:113536132_rs1290177	TCONS_00008712_ATP11A	6.45664	5.04835	9.61378e-07	0.00123524	9.61378e-07	0.002	0.00752224
chr16:70473934_rs8062183	TCONS_00011859_CLEC18C	12.7124	5.04222	9.89256e-07	0.00122426	9.89256e-07	0.002	0.00752224
chr8:103408927_rs62523102	TCONS_00030700_AK001351	21.8043	5.02935	1.0504e-06	0.000909236	1.0504e-06	0.002	0.00752224
chr18:61622086_rs8090046	TCONS_00080284_add_HMSD	10.8336	5.01844	1.10508e-06	0.00188397	1.10508e-06	0.002	0.00752224
chr6:26130690_rs198807	TCONS_00026871_HIST1H2AC	3.21971	5.00502	1.17616e-06	0.000286158	1.17616e-06	0.002	0.00752224
chr20:54963739_rs6024846	TCONS_00020824_AURKA	-9.27595	-4.97085	1.37762e-06	0.00084671	1.37762e-06	0.002	0.00752224
chr1:8021973_rs35675666	TCONS_00000063_PARK7	-3.53273	-4.96791	1.39644e-06	0.00116034	1.39644e-06	0.002	0.00752224
chr14:50507134_rs7141684	TCONS_00051466_add_LOC100506499	-5.25298	-4.96393	1.42234e-06	0.00125639	1.42234e-06	0.002	0.00752224
chr16:16291858_rs12929920	TCONS_00061157_add_PKD1P1	-3.4784	-4.95337	1.49329e-06	0.00175365	1.49329e-06	0.002	0.00752224
chr20:45027364_rs6065979	TCONS_00020743_ELMO2	6.05702	4.94992	1.51718e-06	0.000928456	1.51718e-06	0.002	0.00752224
chr18:21882212_rs28663354	TCONS_00014978_OSBPL1A	-3.82839	-4.94613	1.54385e-06	0.00261716	1.54385e-06	0.002	0.00752224
chr12:105002137_rs7972130	TCONS_00007354_CHST11	-2.67766	-4.94601	1.54471e-06	0.00125307	1.54471e-06	0.002	0.00752224
chr17:44571543_rs150901855	TCONS_00013191_NSFP1	-21.2155	-4.94202	1.5733e-06	0.00148912	1.5733e-06	0.002	0.00752224
chr19:51924219_rs10421595	TCONS_00017242_SIGLEC10	7.32606	4.93863	1.598e-06	0.00237261	1.598e-06	0.002	0.00752224
chr9:123549367_rs10985038	TCONS_00032574_RAB14	-5.8918	-4.9353	1.62265e-06	0.00133052	1.62265e-06	0.002	0.00752224
chr9:123549367_rs10985038	TCONS_00032575_RAB14	5.8918	4.9353	1.62265e-06	0.00133052	1.62265e-06	0.002	0.00752224
chr4:103632963_rs223508	TCONS_00024953_MANBA	5.00935	4.92229	1.72244e-06	0.00100809	1.72244e-06	0.002	0.00752224
chr4:103632963_rs223508	TCONS_00024952_MANBA	-5.00935	-4.92229	1.72244e-06	0.00100809	1.72244e-06	0.002	0.00752224
chr2:242750927_rs62193090	TCONS_00018734_NEU4	15.3549	4.92146	1.72901e-06	0.00201874	1.72901e-06	0.002	0.00752224
chr2:242750927_rs62193090	TCONS_00018733_NEU4	-15.3549	-4.92146	1.72901e-06	0.00201874	1.72901e-06	0.002	0.00752224
chr6:32814975_rs1135216	TCONS_00027150_LOC100507463	-4.48514	-4.91932	1.74602e-06	0.00040805	1.74602e-06	0.002	0.00752224
chr22:42467695_rs133378	TCONS_00021964_NAGA	-1.86093	-4.91725	1.76265e-06	0.00128959	1.76265e-06	0.002	0.00752224
chr22:42467695_rs133378	TCONS_00021968_NAGA	1.86093	4.91725	1.76265e-06	0.00128959	1.76265e-06	0.002	0.00752224
chr4:3390272_rs13127597	TCONS_00128972_add_RGS12	2.22355	4.91699	1.76478e-06	0.00102824	1.76478e-06	0.002	0.00752224
chr17:17120812_rs4985752	TCONS_00013843_COPS3	-2.47446	-4.91679	1.76643e-06	0.00165042	1.76643e-06	0.002	0.00752224
chr17:17120812_rs4985752	TCONS_00013844_COPS3	2.47446	4.91679	1.76643e-06	0.00165042	1.76643e-06	0.002	0.00752224
chr1:2511280_rs10797434	TCONS_00000037_TNFRSF14	-1.49445	-4.90017	1.90596e-06	0.00153518	1.90596e-06	0.002	0.00752224
chr6:31061630_rs191153530	TCONS_00027025_MICA	7.52895	4.87204	2.16672e-06	0.00049671	2.16672e-06	0.002	0.00752224
chr1:201954731_rs6702211	TCONS_00001563_RNPEP	-11.6062	-4.86563	2.23082e-06	0.00176675	2.23082e-06	0.002	0.00752224
chr17:7183440_rs9902838	TCONS_00012737_ELP5	-13.8137	-4.86503	2.23686e-06	0.00203985	2.23686e-06	0.002	0.00752224
chr19:21395652_rs184032321	TCONS_00083847_add_ZNF738	-5.55436	-4.85121	2.38171e-06	0.00343281	2.38171e-06	0.002	0.00752224
chr2:101828801_rs62152553	TCONS_00019264_RNF149	-1.87948	-4.84393	2.4616e-06	0.00272649	2.4616e-06	0.002	0.00752224
chr21:34844729_rs13048219	TCONS_00021174_GART	-0.99587	-4.83704	2.53971e-06	0.00557055	2.53971e-06	0.002	0.00752224
chr3:36968347_rs11926768	TCONS_00022319_MLH1	-1.79786	-4.83556	2.55669e-06	0.00161726	2.55669e-06	0.002	0.00752224
chr3:36968347_rs11926768	TCONS_00022320_MLH1	1.79786	4.83556	2.55669e-06	0.00161726	2.55669e-06	0.002	0.00752224
chr18:60517827_rs687821	TCONS_00015069_PIGN	4.81767	4.82888	2.63518e-06	0.00442094	2.63518e-06	0.002	0.00752224
chr6:31428967_rs115396777	TCONS_00027020_MICA	2.06827	4.82582	2.67185e-06	0.00060196	2.67185e-06	0.002	0.00752224
chr1:201954731_rs6702211	TCONS_00001564_RNPEP	11.6607	4.82152	2.72419e-06	0.00211198	2.72419e-06	0.002	0.00752224
chr1:39940499_rs61779309	TCONS_00002285_PABPC4	2.60677	4.81145	2.85089e-06	0.00219854	2.85089e-06	0.002	0.00752224
chr3:56836740_rs4681898	TCONS_00023585_ARHGEF3	-1.38127	-4.80588	2.92331e-06	0.00182483	2.92331e-06	0.002	0.00752224
chr3:56836740_rs4681898	TCONS_00023584_ARHGEF3	1.38127	4.80588	2.92331e-06	0.00182483	2.92331e-06	0.002	0.00752224
chr6:33267672_rs1059288	TCONS_00028122_TAPBP	-3.33178	-4.80368	2.95238e-06	0.000660589	2.95238e-06	0.002	0.00752224
chr6:33267672_rs1059288	TCONS_00028123_TAPBP	3.33178	4.80368	2.95238e-06	0.000660589	2.95238e-06	0.002	0.00752224
chr17:80411883_rs58441535	TCONS_00014676_C17orf62	1.78251	4.78527	3.20725e-06	0.00283515	3.20725e-06	0.002	0.00752224
chr15:34875150_rs6495689	TCONS_00010709_GOLGA8B	4.73642	4.77562	3.3491e-06	0.00234165	3.3491e-06	0.002	0.00752224
chr6:25111089_rs1547054	TCONS_00027827_CMAHP	6.31116	4.76837	3.4597e-06	0.000761196	3.4597e-06	0.002	0.00752224
chr6:25111089_rs1547054	TCONS_00027828_CMAHP	-6.31116	-4.76837	3.4597e-06	0.000761196	3.4597e-06	0.002	0.00752224
chr19:48759365_rs10424564	TCONS_00017040_CARD8	-4.87822	-4.75056	3.74662e-06	0.00516778	3.74662e-06	0.002	0.00752224
chr7:72203887_rs55967024	TCONS_00028975_SBDSP1	5.82873	4.7488	3.77614e-06	0.00170923	3.77614e-06	0.002	0.00752224
chr12:121670064_rs2071271	TCONS_00008235_CAMKK2	5.30481	4.74553	3.83167e-06	0.00278964	3.83167e-06	0.002	0.00752224
chr17:55266176_rs9907790	TCONS_00014315_CUEDC1	-11.2218	-4.71972	4.29848e-06	0.00363923	4.29848e-06	0.002	0.00752224
chr10:100221266_rs10883104	TCONS_00004034_R3HCC1L	6.16529	4.70782	4.53165e-06	0.00209673	4.53165e-06	0.002	0.00752224
chr17:43092635_rs9891298	TCONS_00013172_NMT1	-1.73463	-4.67148	5.32223e-06	0.00438562	5.32223e-06	0.002	0.00752224
chr17:43092635_rs9891298	TCONS_00013171_NMT1	1.73463	4.67148	5.32223e-06	0.00438562	5.32223e-06	0.002	0.00752224
chr2:218899781_rs744271	TCONS_00019630_CXCR2P1	1.82865	4.66018	5.59398e-06	0.00559487	5.59398e-06	0.002	0.00752224
chr2:120461320_rs10864988	TCONS_00018025_RALB	1.41652	4.5833	7.83163e-06	0.00749101	7.83163e-06	0.002	0.00752224
chr1:155424065_rs11264375	TCONS_00001124_FDPS	-2.68936	-4.56738	8.39251e-06	0.00566338	8.39251e-06	0.002	0.00752224
chr1:155424065_rs11264375	TCONS_00001128_FDPS	2.68936	4.56738	8.39251e-06	0.00566338	8.39251e-06	0.002	0.00752224
chr3:50374568_rs57838764	TCONS_00023450_RASSF1	-4.71651	-4.55763	8.75462e-06	0.00490736	8.75462e-06	0.002	0.00752224
chr14:67975822_rs1077989	TCONS_00009873_TMEM229B	6.4557	4.5424	9.35125e-06	0.00669631	9.35125e-06	0.002	0.00752224
chr2:74091805_rs3738846	TCONS_00017746_STAMBP	-3.15507	-4.49578	1.14289e-05	0.0102736	1.14289e-05	0.002	0.00752224
chr2:74091805_rs3738846	TCONS_00017747_STAMBP	3.15507	4.49578	1.14289e-05	0.0102736	1.14289e-05	0.002	0.00752224
chr4:46718427_rs62303508	TCONS_00024237_ATP10D	-5.91913	-4.46571	1.29976e-05	0.00606265	1.29976e-05	0.002	0.00752224
chr5:131578265_rs2136186	TCONS_00026323_P4HA2	5.64724	4.3095	2.50913e-05	0.0157305	2.50913e-05	0.002	0.00752224
chr19:51608555_rs12462533	TCONS_00017235_VSIG10L	-6.47764	-5.5089	1.04532e-07	0.000191658	1.04532e-07	0.003	0.0109795
chr7:72898228_rs7799778	TCONS_00028992_FKBP6	-4.11276	-5.28854	3.07418e-07	0.000176711	3.07418e-07	0.003	0.0109795
chr15:34722209_rs349633	TCONS_00010687_GOLGA8A	-6.96305	-5.19299	4.86042e-07	0.000454545	4.86042e-07	0.003	0.0109795
chr19:55171748_rs425283	TCONS_00016057_LILRB1	-4.79625	-5.09269	7.81132e-07	0.00124073	7.81132e-07	0.003	0.0109795
chr7:134548859_rs10247845	TCONS_00030185_C7orf49	-4.3343	-5.02796	1.05721e-06	0.000545594	1.05721e-06	0.003	0.0109795
chr13:108984010_rs9520842	TCONS_00008701_TNFSF13B	-1.67754	-4.98702	1.27842e-06	0.00156972	1.27842e-06	0.003	0.0109795
chr13:108984010_rs9520842	TCONS_00008702_TNFSF13B	1.67754	4.98702	1.27842e-06	0.00156972	1.27842e-06	0.003	0.0109795
chr3:160245948_rs1551190	TCONS_00126118_add_KPNA4	1.73147	4.98606	1.28414e-06	0.000862168	1.28414e-06	0.003	0.0109795
chr3:160245948_rs1551190	TCONS_00126117_add_KPNA4	-1.73147	-4.98606	1.28414e-06	0.000862168	1.28414e-06	0.003	0.0109795
chr9:27546828_rs9103	TCONS_00032166_MOB3B	-3.99751	-4.95711	1.46779e-06	0.00121585	1.46779e-06	0.003	0.0109795
chr9:27546828_rs9103	TCONS_00032165_MOB3B	3.99751	4.95711	1.46779e-06	0.00121585	1.46779e-06	0.003	0.0109795
chr10:135285837_rs12269225	TCONS_00023868_add_FRG2B	-21.2002	-4.93795	1.60299e-06	0.000823831	1.60299e-06	0.003	0.0109795
chr1:209960922_rs599021	TCONS_00001677_TRAF3IP3	3.16044	4.93417	1.63109e-06	0.00133454	1.63109e-06	0.003	0.0109795
chr1:209960922_rs599021	TCONS_00001676_TRAF3IP3	-3.16044	-4.93417	1.63109e-06	0.00133454	1.63109e-06	0.003	0.0109795
chr4:185396395_rs17075872	TCONS_00025217_IRF2	1.93744	4.91739	1.76155e-06	0.0010268	1.76155e-06	0.003	0.0109795
chr6:36327859_rs112609487	TCONS_00028162_ETV7	2.60088	4.91186	1.80676e-06	0.000420836	1.80676e-06	0.003	0.0109795
chr15:34744461_rs188874935	TCONS_00010695_GOLGA8B	-27.7774	-4.91011	1.82128e-06	0.00138199	1.82128e-06	0.003	0.0109795
chr7:127194176_rs6970053	TCONS_00030154_ZNF800	3.73837	4.90895	1.83091e-06	0.000882686	1.83091e-06	0.003	0.0109795
chr1:167758901_rs3088322	TCONS_00001362_MPZL1	-2.91543	-4.89309	1.96853e-06	0.00157944	1.96853e-06	0.003	0.0109795
chr1:167758901_rs3088322	TCONS_00001363_MPZL1	2.91543	4.89309	1.96853e-06	0.00157944	1.96853e-06	0.003	0.0109795
chr10:5388487_rs10904470	TCONS_00003509_RBM17	-4.90305	-4.86808	2.20614e-06	0.00109553	2.20614e-06	0.003	0.0109795
chr10:5388487_rs10904470	TCONS_00003510_RBM17	4.90305	4.86808	2.20614e-06	0.00109553	2.20614e-06	0.003	0.0109795
chr19:15766866_rs4808347	TCONS_00015497_KLF2	-2.8021	-4.84448	2.45549e-06	0.00352609	2.45549e-06	0.003	0.0109795
chr19:15766866_rs4808347	TCONS_00015496_KLF2	2.8021	4.84448	2.45549e-06	0.00352609	2.45549e-06	0.003	0.0109795
chr10:79407805_rs2673438	TCONS_00004501_KCNMA1	2.94844	4.83935	2.51325e-06	0.00122945	2.51325e-06	0.003	0.0109795
chr5:110853370_rs12523626	TCONS_00026275_STARD4	-3.66556	-4.83362	2.57922e-06	0.00229401	2.57922e-06	0.003	0.0109795
chr8:22372262_rs2443494	TCONS_00030451_SORBS3	-8.64012	-4.83082	2.61209e-06	0.00209818	2.61209e-06	0.003	0.0109795
chr19:48759365_rs10424564	TCONS_00017036_CARD8	4.79185	4.81232	2.83975e-06	0.00402009	2.83975e-06	0.003	0.0109795
chr9:135138261_rs7875801	TCONS_00032694_SETX	-3.37116	-4.80651	2.91508e-06	0.00226065	2.91508e-06	0.003	0.0109795
chr5:180238039_rs2619733	TCONS_00026703_MGAT1	0.127568	4.78839	3.16266e-06	0.00275566	3.16266e-06	0.003	0.0109795
chr5:180258114_rs192890424	TCONS_00026031_LINC00847	-12.0878	-4.77582	3.34611e-06	0.00290226	3.34611e-06	0.003	0.0109795
chr17:48208693_rs847681	TCONS_00014270_PPP1R9B	-0.258034	-4.75458	3.67987e-06	0.00316506	3.67987e-06	0.003	0.0109795
chr16:65737243_rs7186160	TCONS_00062822_add_CKLF	5.99923	4.71683	4.35407e-06	0.00450207	4.35407e-06	0.003	0.0109795
chr4:103399049_rs62328536	TCONS_00024404_NFKB1	-0.915697	-4.67022	5.35185e-06	0.0027629	5.35185e-06	0.003	0.0109795
chr11:59991847_rs620612	TCONS_00006178_MS4A6A	-2.72433	-4.66549	5.46454e-06	0.00275995	5.46454e-06	0.003	0.0109795
chr6:31106177_rs1265098	TCONS_00027862_TRIM26	2.73668	4.64594	5.95558e-06	0.00124175	5.95558e-06	0.003	0.0109795
chr22:31091934_rs5994334	TCONS_00114000_add_SLC35E4	-3.35962	-4.64327	6.02587e-06	0.00372912	6.02587e-06	0.003	0.0109795
chr17:16356319_rs8082268	TCONS_00012860_C17orf76-AS1	1.70636	4.63232	6.32245e-06	0.00511848	6.32245e-06	0.003	0.0109795
chr17:2273581_rs12602246	TCONS_00012578_SGSM2	-10.0549	-4.58133	7.89918e-06	0.00623904	7.89918e-06	0.003	0.0109795
chr3:156877530_rs12635088	TCONS_00023913_CCNL1	-0.924441	-4.51672	1.0446e-05	0.00575076	1.0446e-05	0.003	0.0109795
chr17:61851588_rs9913551	TCONS_00013386_DDX42	2.54302	4.50277	1.10913e-05	0.00846245	1.10913e-05	0.003	0.0109795
chr12:55428111_rs2171498	TCONS_00007908_WIBG	-2.56631	-4.48675	1.18801e-05	0.00756633	1.18801e-05	0.003	0.0109795
chr2:131625100_rs72855904	TCONS_00019335_FAM168B	13.3029	4.46028	1.33024e-05	0.0116848	1.33024e-05	0.003	0.0109795
chr10:14678962_rs12218166	TCONS_00021393_add_FAM171A1	-6.8577	-5.64661	5.24554e-08	3.39434e-05	5.24554e-08	0.004	0.0141692
chr7:72898228_rs7799778	TCONS_00029002_FKBP6	4.09332	5.35381	2.24059e-07	0.000133093	2.24059e-07	0.004	0.0141692
chr22:24323514_rs139012979	TCONS_00021745_GSTT1	17.0483	5.24651	3.76308e-07	0.000328992	3.76308e-07	0.004	0.0141692
chr13:113536132_rs1290177	TCONS_00008713_ATP11A	6.9186	5.07618	8.4402e-07	0.00110943	8.4402e-07	0.004	0.0141692
chr18:3447725_rs238137	TCONS_00014763_TGIF1	-5.80536	-5.05363	9.3794e-07	0.00161077	9.3794e-07	0.004	0.0141692
chr4:185780056_rs13103917	TCONS_00025237_BC016366	3.82484	4.95705	1.46816e-06	0.000875604	1.46816e-06	0.004	0.0141692
chr17:5462654_rs2001363	TCONS_00073623_add_NLRP1	4.67575	4.93071	1.6572e-06	0.00155607	1.6572e-06	0.004	0.0141692
chr16:20443208_rs12924372	TCONS_00011386_ACSM5	-10.7878	-4.9266	1.68876e-06	0.00194408	1.68876e-06	0.004	0.0141692
chr14:22492227_rs66621809	TCONS_00009688_SLC7A7	-4.30813	-4.92641	1.69025e-06	0.00147321	1.69025e-06	0.004	0.0141692
chr6:44106548_rs12663599	TCONS_00028221_MRPL14	3.47531	4.91498	1.78109e-06	0.00041541	1.78109e-06	0.004	0.0141692
chr6:44106548_rs12663599	TCONS_00028222_MRPL14	-3.47531	-4.91498	1.78109e-06	0.00041541	1.78109e-06	0.004	0.0141692
chr17:35470920_rs9903451	TCONS_00013058_GGNBP2	-6.67927	-4.91376	1.7911e-06	0.00167167	1.7911e-06	0.004	0.0141692
chr15:52388000_rs28715677	TCONS_00010831_MYO5A	-4.04292	-4.90819	1.83731e-06	0.00139026	1.83731e-06	0.004	0.0141692
chr3:183387272_rs16857954	TCONS_00023016_KLHL24	7.08671	4.89844	1.92104e-06	0.00124611	1.92104e-06	0.004	0.0141692
chr13:50012949_rs7327520	TCONS_00008620_SETDB2	-4.47329	-4.8832	2.05936e-06	0.00233212	2.05936e-06	0.004	0.0141692
chr22:36639975_rs2413394	TCONS_00021443_APOL1	-1.50482	-4.87521	2.1357e-06	0.00152327	2.1357e-06	0.004	0.0141692
chr22:36639975_rs2413394	TCONS_00021440_APOL1	1.50482	4.87521	2.1357e-06	0.00152327	2.1357e-06	0.004	0.0141692
chr14:92588219_rs7148709	TCONS_00009506_CPSF2	-4.70248	-4.85057	2.38867e-06	0.00202929	2.38867e-06	0.004	0.0141692
chr19:14867566_rs2524388	TCONS_00016658_EMR2	-6.88618	-4.84293	2.47282e-06	0.00354917	2.47282e-06	0.004	0.0141692
chr11:74705696_rs544115	TCONS_00005543_NEU3	-2.71553	-4.84096	2.49504e-06	0.00136196	2.49504e-06	0.004	0.0141692
chr10:79407805_rs2673438	TCONS_00004500_KCNMA1	-2.94844	-4.83935	2.51325e-06	0.00122945	2.51325e-06	0.004	0.0141692
chr20:18793217_rs6081382	TCONS_00020587_SNX5	-3.04328	-4.81514	2.8038e-06	0.00161419	2.8038e-06	0.004	0.0141692
chr20:18793217_rs6081382	TCONS_00020591_SNX5	3.04328	4.81514	2.8038e-06	0.00161419	2.8038e-06	0.004	0.0141692
chr3:125982366_rs6806406	TCONS_00022756_PLXNA1	15.0761	4.81487	2.80721e-06	0.00175984	2.80721e-06	0.004	0.0141692
chr3:125982366_rs6806406	TCONS_00022755_PLXNA1	-15.0761	-4.81487	2.80721e-06	0.00175984	2.80721e-06	0.004	0.0141692
chr16:88787673_rs35159887	TCONS_00012508_PIEZO1	4.01646	4.79437	3.07866e-06	0.00329357	3.07866e-06	0.004	0.0141692
chr7:1732145_rs6965308	TCONS_00028637_EIF3B	-14.8251	-4.78699	3.18251e-06	0.00146444	3.18251e-06	0.004	0.0141692
chr7:1732145_rs6965308	TCONS_00028638_EIF3B	14.8251	4.78699	3.18251e-06	0.00146444	3.18251e-06	0.004	0.0141692
chr11:57640994_rs682503	TCONS_00005078_TMX2-CTNND1	0.559572	4.77973	3.28796e-06	0.00175114	3.28796e-06	0.004	0.0141692
chr5:180225013_rs2129059	TCONS_00026032_LINC00847	5.59036	4.76612	3.49472e-06	0.00302185	3.49472e-06	0.004	0.0141692
chr21:27199496_rs1571660	TCONS_00112029_add_LINC00158	-2.90118	-4.75955	3.599e-06	0.00759449	3.599e-06	0.004	0.0141692
chr17:62475167_rs7214692	TCONS_00013394_MILR1	-7.68509	-4.75714	3.63807e-06	0.0031353	3.63807e-06	0.004	0.0141692
chr8:38481452_rs4733889	TCONS_00030518_ASH2L	3.92995	4.74778	3.79343e-06	0.00292359	3.79343e-06	0.004	0.0141692
chr8:38481452_rs4733889	TCONS_00030519_ASH2L	-3.92995	-4.74778	3.79343e-06	0.00292359	3.79343e-06	0.004	0.0141692
chr15:39321481_rs11633975	TCONS_00010194_SPRED1	5.38985	4.73673	3.98499e-06	0.00270669	3.98499e-06	0.004	0.0141692
chr19:17862131_rs12979056	TCONS_00015539_MAP1S	-2.28734	-4.73254	4.06012e-06	0.00556281	4.06012e-06	0.004	0.0141692
chr19:17862131_rs12979056	TCONS_00015538_MAP1S	2.28734	4.73254	4.06012e-06	0.00556281	4.06012e-06	0.004	0.0141692
chr9:219896_rs663552	TCONS_00031478_DOCK8	1.36593	4.72256	4.24456e-06	0.00317847	4.24456e-06	0.004	0.0141692
chr8:81082524_rs7011062	TCONS_00031113_TPD52	-1.60108	-4.71349	4.41908e-06	0.00333813	4.41908e-06	0.004	0.0141692
chr10:102796774_rs2275383	TCONS_00004052_SFXN3	-1.04015	-4.70583	4.57196e-06	0.00211319	4.57196e-06	0.004	0.0141692
chr3:46464017_rs34671664	TCONS_00022404_CCR5	3.93662	4.69495	4.79787e-06	0.00285861	4.79787e-06	0.004	0.0141692
chr3:75822036_rs6787680	TCONS_00120191_add_LOC401074	6.43598	4.65407	5.74631e-06	0.00336382	5.74631e-06	0.004	0.0141692
chr10:32378320_rs11008762	TCONS_00004350_ARHGAP12	-3.65452	-4.64127	6.07908e-06	0.00273981	6.07908e-06	0.004	0.0141692
chr1:160149606_rs6657759	TCONS_00002985_B4GALT3	3.47044	4.62188	6.61832e-06	0.00462386	6.61832e-06	0.004	0.0141692
chr1:160149606_rs6657759	TCONS_00002984_B4GALT3	-3.47044	-4.62188	6.61832e-06	0.00462386	6.61832e-06	0.004	0.0141692
chr13:44450594_rs9533671	TCONS_00008561_LACC1	5.69518	4.61544	6.80728e-06	0.00680474	6.80728e-06	0.004	0.0141692
chr5:180214474_rs682828	TCONS_00026695_MGAT1	2.28891	4.61333	6.87033e-06	0.00534145	6.87033e-06	0.004	0.0141692
chr4:146700781_rs9308196	TCONS_00025038_OTUD4	-1.72822	-4.57385	8.1601e-06	0.00400779	8.1601e-06	0.004	0.0141692
chr22:51028255_rs140513	TCONS_00022162_CHKB-CPT1B	2.38579	4.5664	8.42803e-06	0.00498018	8.42803e-06	0.004	0.0141692
chr19:13332551_rs1865032	TCONS_00016643_CACNA1A	5.99226	4.5584	8.7258e-06	0.0107927	8.7258e-06	0.004	0.0141692
chr2:187513341_rs6753438	TCONS_00018253_ITGAV	-2.52398	-4.47588	1.24454e-05	0.0110505	1.24454e-05	0.004	0.0141692
chr7:102503186_rs12530741	TCONS_00160271_add_POLR2J2	-4.80028	-4.40867	1.65601e-05	0.00632389	1.65601e-05	0.004	0.0141692
chr7:65216099_rs4718273	TCONS_00028951_CCT6P1	2.15917	4.3899	1.79244e-05	0.00676518	1.79244e-05	0.004	0.0141692
chr1:28717682_rs149674434	TCONS_00000297_PHACTR4	-3.96915	-5.66693	4.73334e-08	5.46132e-05	4.73334e-08	0.005	0.0173025
chr5:1637864_rs10475075	TCONS_00138720_add_LOC728613	8.82715	5.02867	1.05372e-06	0.00106245	1.05372e-06	0.005	0.0173025
chr19:51918394_rs35546227	TCONS_00017251_SIGLEC10	4.91619	4.99768	1.21687e-06	0.00185204	1.21687e-06	0.005	0.0173025
chr17:65815463_rs929580	TCONS_00013402_BPTF	7.68641	4.96036	1.44595e-06	0.00137964	1.44595e-06	0.005	0.0173025
chr17:65815463_rs929580	TCONS_00013403_BPTF	-7.68641	-4.96036	1.44595e-06	0.00137964	1.44595e-06	0.005	0.0173025
chr10:6016020_rs8177648	TCONS_00004209_IL15RA	1.49724	4.93994	1.5884e-06	0.000817114	1.5884e-06	0.005	0.0173025
chr2:71620111_rs4852780	TCONS_00017727_DYSF	3.31237	4.92801	1.67789e-06	0.0019677	1.67789e-06	0.005	0.0173025
chr10:17600751_rs11595485	TCONS_00003584_TMEM236	-10.9684	-4.86904	2.19652e-06	0.00109263	2.19652e-06	0.005	0.0173025
chr10:29856448_rs10763724	TCONS_00004338_SVIL	-3.76019	-4.85098	2.38426e-06	0.00117332	2.38426e-06	0.005	0.0173025
chr19:14884946_rs2302090	TCONS_00016661_EMR2	5.67959	4.84766	2.4204e-06	0.00348235	2.4204e-06	0.005	0.0173025
chr12:12094640_rs4763740	TCONS_00006832_ETV6	-3.92828	-4.83696	2.54061e-06	0.00193991	2.54061e-06	0.005	0.0173025
chr15:77605994_rs3975802	TCONS_00011019_PEAK1	-6.45004	-4.80017	2.99951e-06	0.00213166	2.99951e-06	0.005	0.0173025
chr9:17289821_rs9406673	TCONS_00031534_CNTLN	-2.51851	-4.79091	3.12703e-06	0.00240528	3.12703e-06	0.005	0.0173025
chr9:17289821_rs9406673	TCONS_00031533_CNTLN	2.51851	4.79091	3.12703e-06	0.00240528	3.12703e-06	0.005	0.0173025
chr10:91003419_rs1332329	TCONS_00004538_LIPA	0.828422	4.7827	3.24444e-06	0.00155531	3.24444e-06	0.005	0.0173025
chr19:47769165_rs10407675	TCONS_00015866_CCDC9	-4.50571	-4.76052	3.58349e-06	0.00496217	3.58349e-06	0.005	0.0173025
chr17:74434003_rs1000821	TCONS_00013451_SPHK1	4.62277	4.74483	3.84373e-06	0.00329179	3.84373e-06	0.005	0.0173025
chr12:7067555_rs2071079	TCONS_00006797_EMG1	3.05867	4.73933	3.93911e-06	0.00286126	3.93911e-06	0.005	0.0173025
chr12:7067555_rs2071079	TCONS_00006798_EMG1	-3.05867	-4.73933	3.93911e-06	0.00286126	3.93911e-06	0.005	0.0173025
chr7:30599408_rs13228079	TCONS_00158252_add_LOC401320	-1.66854	-4.73287	4.05417e-06	0.00182257	4.05417e-06	0.005	0.0173025
chr12:101400699_rs17485225	TCONS_00007314_CHPT1	6.4477	4.7194	4.30467e-06	0.00310115	4.30467e-06	0.005	0.0173025
chr12:101400699_rs17485225	TCONS_00007315_CHPT1	-6.4477	-4.7194	4.30467e-06	0.00310115	4.30467e-06	0.005	0.0173025
chr1:156174837_rs2736606	TCONS_00005364_add_SLC25A44	7.80273	4.70776	4.53294e-06	0.00331509	4.53294e-06	0.005	0.0173025
chr17:59794627_rs8074279	TCONS_00014384_BRIP1	-1.0366	-4.69781	4.73747e-06	0.00398572	4.73747e-06	0.005	0.0173025
chr3:46464017_rs34671664	TCONS_00022406_CCR5	-3.93662	-4.69495	4.79787e-06	0.00285861	4.79787e-06	0.005	0.0173025
chr14:31137234_rs183550301	TCONS_00009202_SCFD1	-2.07562	-4.67221	5.30502e-06	0.00409066	5.30502e-06	0.005	0.0173025
chr2:64197370_rs116748117	TCONS_00017679_UGP2	-1.65058	-4.65384	5.7522e-06	0.00573562	5.7522e-06	0.005	0.0173025
chr2:64197370_rs116748117	TCONS_00017677_UGP2	1.65058	4.65384	5.7522e-06	0.00573562	5.7522e-06	0.005	0.0173025
chr7:150498508_rs1108578	TCONS_00029456_TMEM176A	7.99962	4.63506	6.2469e-06	0.00267955	6.2469e-06	0.005	0.0173025
chr3:38609334_rs9861242	TCONS_00123025_add_SCN5A	-4.97857	-4.60164	7.23036e-06	0.0041094	7.23036e-06	0.005	0.0173025
chr7:54720139_rs10249631	TCONS_00029815_VOPP1	8.97227	4.59774	7.35426e-06	0.00310922	7.35426e-06	0.005	0.0173025
chr11:33745775_rs10768022	TCONS_00006011_CD59	0.311158	4.59094	7.57547e-06	0.00369179	7.57547e-06	0.005	0.0173025
chr4:142391371_rs17354568	TCONS_00024508_IL15	-1.42537	-4.56238	8.57653e-06	0.00419455	8.57653e-06	0.005	0.0173025
chr7:137116928_rs62487736	TCONS_00030194_CREB3L2	-6.67482	-4.55649	8.79811e-06	0.00364501	8.79811e-06	0.005	0.0173025
chr7:137116928_rs62487736	TCONS_00030193_CREB3L2	6.67482	4.55649	8.79811e-06	0.00364501	8.79811e-06	0.005	0.0173025
chr8:8155475_rs2945891	TCONS_00030880_SGK223	-1.18127	-4.55637	8.80272e-06	0.00610149	8.80272e-06	0.005	0.0173025
chr5:39243179_rs185542	TCONS_00026091_FYB	-8.23464	-4.51997	1.0301e-05	0.00755204	1.0301e-05	0.005	0.0173025
chr12:51138862_rs1047912	TCONS_00006967_DIP2B	-3.62268	-4.44302	1.43161e-05	0.00887436	1.43161e-05	0.005	0.0173025
chr12:51138862_rs1047912	TCONS_00006968_DIP2B	3.62268	4.44302	1.43161e-05	0.00887436	1.43161e-05	0.005	0.0173025
chr11:6753197_rs9888283	TCONS_00005932_GVINP1	0.998228	5.54612	8.686e-08	5.96897e-05	8.686e-08	0.006	0.0203061
chr11:6753197_rs9888283	TCONS_00005933_GVINP1	-0.998228	-5.54612	8.686e-08	5.96897e-05	8.686e-08	0.006	0.0203061
chr17:34825482_rs1564708	TCONS_00014035_TBC1D3G	9.01564	5.37311	2.03945e-07	0.000232328	2.03945e-07	0.006	0.0203061
chr16:84211718_rs1056616	TCONS_00011917_ADAD2	5.04369	5.00751	1.16264e-06	0.00141348	1.16264e-06	0.006	0.0203061
chr16:84211718_rs1056616	TCONS_00011910_ADAD2	-5.04369	-5.00751	1.16264e-06	0.00141348	1.16264e-06	0.006	0.0203061
chr21:43914031_rs6586321	TCONS_00021029_SLC37A1	9.61442	4.97841	1.33038e-06	0.00302453	1.33038e-06	0.006	0.0203061
chr19:44864065_rs4239530	TCONS_00015835_RELB	6.04673	4.9281	1.67717e-06	0.00248004	1.67717e-06	0.006	0.0203061
chr19:44864065_rs4239530	TCONS_00015834_RELB	-6.04673	-4.9281	1.67717e-06	0.00248004	1.67717e-06	0.006	0.0203061
chr13:95874209_rs79083026	TCONS_00009006_ABCC4	-17.2662	-4.78697	3.18288e-06	0.00342494	3.18288e-06	0.006	0.0203061
chr17:4893357_rs427703	TCONS_00013724_CAMTA2	2.44927	4.78161	3.26038e-06	0.00287664	3.26038e-06	0.006	0.0203061
chr17:4893357_rs427703	TCONS_00013725_CAMTA2	-2.44927	-4.78161	3.26038e-06	0.00287664	3.26038e-06	0.006	0.0203061
chr4:15706920_rs55735476	TCONS_00024163_FAM200B	5.20537	4.75553	3.6643e-06	0.00195082	3.6643e-06	0.006	0.0203061
chr4:15706920_rs55735476	TCONS_00024162_FAM200B	-5.20537	-4.75553	3.6643e-06	0.00195082	3.6643e-06	0.006	0.0203061
chr19:8488754_rs11667018	TCONS_00015319_HNRNPM	-2.10814	-4.73043	4.09844e-06	0.00560782	4.09844e-06	0.006	0.0203061
chr12:32134638_rs2166807	TCONS_00006922_KIAA1551	-1.0414	-4.70363	4.61677e-06	0.00330107	4.61677e-06	0.006	0.0203061
chr9:4888355_rs10117872	TCONS_00032102_PLGRKT	-3.06464	-4.68134	5.09544e-06	0.00373963	5.09544e-06	0.006	0.0203061
chr11:64117491_rs12793347	TCONS_00006294_TRPT1	9.46588	4.67345	5.27619e-06	0.00267255	5.27619e-06	0.006	0.0203061
chr2:231170269_rs59559342	TCONS_00018605_SP140	-1.55752	-4.66987	5.36004e-06	0.00538652	5.36004e-06	0.006	0.0203061
chr4:47267184_rs35969923	TCONS_00024784_TEC	-2.5779	-4.66055	5.58495e-06	0.00287156	5.58495e-06	0.006	0.0203061
chr17:73956737_rs7219716	TCONS_00014510_SLC25A19	7.17398	4.65884	5.627e-06	0.00461549	5.627e-06	0.006	0.0203061
chr19:14884946_rs2302090	TCONS_00015454_CD97	4.19414	4.64206	6.05788e-06	0.00783579	6.05788e-06	0.006	0.0203061
chr1:205833108_rs74218897	TCONS_00003161_ELK4	-6.90952	-4.6388	6.14523e-06	0.00432222	6.14523e-06	0.006	0.0203061
chr8:22259626_rs60712451	TCONS_00030444_PPP3CC	1.7472	4.63521	6.24272e-06	0.0045046	6.24272e-06	0.006	0.0203061
chr22:33001458_rs2710358	TCONS_00116021_add_SLC5A4	10.0755	4.63064	6.36916e-06	0.00390655	6.36916e-06	0.006	0.0203061
chr11:62506718_rs55707677	TCONS_00006265_HNRNPUL2-BSCL2	2.06114	4.62956	6.39947e-06	0.00317014	6.39947e-06	0.006	0.0203061
chr11:62506718_rs55707677	TCONS_00006266_HNRNPUL2-BSCL2	-2.06114	-4.62956	6.39947e-06	0.00317014	6.39947e-06	0.006	0.0203061
chr18:835547_rs12962952	TCONS_00014929_ENOSF1	-8.86158	-4.60494	7.12699e-06	0.0113421	7.12699e-06	0.006	0.0203061
chr18:835547_rs12962952	TCONS_00014930_ENOSF1	8.86158	4.60494	7.12699e-06	0.0113421	7.12699e-06	0.006	0.0203061
chr11:104877927_rs507879	TCONS_00006551_CASP1	-1.13163	-4.59873	7.32278e-06	0.00358153	7.32278e-06	0.006	0.0203061
chr19:11707458_rs10424332	TCONS_00016592_ACP5	-1.69422	-4.59862	7.32615e-06	0.00925151	7.32615e-06	0.006	0.0203061
chr1:65767405_rs80292883	TCONS_00000546_DNAJC6	9.87869	4.57639	8.07042e-06	0.00547685	8.07042e-06	0.006	0.0203061
chr11:117651005_rs182000805	TCONS_00006616_TMPRSS13	-4.77197	-4.55551	8.83538e-06	0.00423243	8.83538e-06	0.006	0.0203061
chr11:94338912_rs694731	TCONS_00005583_PIWIL4	1.697	4.55492	8.85815e-06	0.00424118	8.85815e-06	0.006	0.0203061
chr7:100472380_rs12705091	TCONS_00029179_SLC12A9	-5.31731	-4.54236	9.3526e-06	0.00384199	9.3526e-06	0.006	0.0203061
chr2:198210558_rs7574271	TCONS_00019565_HSPD1	-2.7553	-4.50582	1.09471e-05	0.00991449	1.09471e-05	0.006	0.0203061
chr9:102394118_rs10988873	TCONS_00031788_NR4A3	1.38817	4.39815	1.7312e-05	0.0108442	1.7312e-05	0.006	0.0203061
chr11:46762817_rs61884324	TCONS_00026555_add_C11orf49	14.5607	4.33767	2.23133e-05	0.00936977	2.23133e-05	0.006	0.0203061
chr12:56838936_rs12815993	TCONS_00007160_LRP1	1.80145	4.312	2.48311e-05	0.0141645	2.48311e-05	0.006	0.0203061
chr22:24233998_rs875643	TCONS_00021743_GSTT1	10.5132	5.13635	6.35896e-07	0.00052914	6.35896e-07	0.007	0.0233258
chr6:33077271_rs114481538	TCONS_00027184_HLA-DPB2	25.9613	4.85865	2.30269e-06	0.00052528	2.30269e-06	0.007	0.0233258
chr6:33077271_rs114481538	TCONS_00027180_HLA-DPB2	-25.9613	-4.85865	2.30269e-06	0.00052528	2.30269e-06	0.007	0.0233258
chr19:7550844_rs34970001	TCONS_00015285_PNPLA6	-2.91911	-4.83141	2.60522e-06	0.00372027	2.60522e-06	0.007	0.0233258
chr7:134853309_rs73153795	TCONS_00030186_C7orf49	1.8821	4.77745	3.32178e-06	0.00152246	3.32178e-06	0.007	0.0233258
chr8:22167613_rs6557986	TCONS_00030437_FAM160B2	-6.71992	-4.72908	4.12311e-06	0.00314499	4.12311e-06	0.007	0.0233258
chr8:22167613_rs6557986	TCONS_00030438_FAM160B2	6.71992	4.72908	4.12311e-06	0.00314499	4.12311e-06	0.007	0.0233258
chr8:24101615_rs62501226	TCONS_00163930_add_ADAM28	4.83093	4.6939	4.82021e-06	0.00358693	4.82021e-06	0.007	0.0233258
chr17:9816631_rs3177567	TCONS_00013816_GAS7	-2.85459	-4.68301	5.05799e-06	0.00419711	5.05799e-06	0.007	0.0233258
chr17:9816631_rs3177567	TCONS_00013817_GAS7	2.85459	4.68301	5.05799e-06	0.00419711	5.05799e-06	0.007	0.0233258
chr1:10417853_rs10864454	TCONS_00000099_KIF1B	1.78337	4.65489	5.72575e-06	0.00406001	5.72575e-06	0.007	0.0233258
chr1:10417853_rs10864454	TCONS_00000102_KIF1B	-1.78337	-4.65489	5.72575e-06	0.00406001	5.72575e-06	0.007	0.0233258
chr9:93693246_rs10117309	TCONS_00032390_AUH	14.6627	4.64911	5.87319e-06	0.00423315	5.87319e-06	0.007	0.0233258
chr8:22259626_rs60712451	TCONS_00030443_PPP3CC	-1.7472	-4.63521	6.24272e-06	0.0045046	6.24272e-06	0.007	0.0233258
chr17:35932917_rs11870876	TCONS_00014044_SYNRG	5.3508	4.62925	6.40807e-06	0.00518058	6.40807e-06	0.007	0.0233258
chr12:70086939_rs3937886	TCONS_00037707_add_FRS2	-11.0651	-4.61704	6.75985e-06	0.00463798	6.75985e-06	0.007	0.0233258
chr3:100037644_rs1228183	TCONS_00022633_TBC1D23	2.92011	4.57848	7.99759e-06	0.0045168	7.99759e-06	0.007	0.0233258
chr3:100037644_rs1228183	TCONS_00022637_TBC1D23	-2.92011	-4.57848	7.99759e-06	0.0045168	7.99759e-06	0.007	0.0233258
chr6:32806391_rs4148870	TCONS_00027154_LOC100507463	-1.98178	-4.57099	8.26203e-06	0.00166285	8.26203e-06	0.007	0.0233258
chr9:33762135_rs10758227	TCONS_00032223_KIAA1161	8.79715	4.57065	8.27425e-06	0.00570826	8.27425e-06	0.007	0.0233258
chr11:93911856_rs2282655	TCONS_00005577_PANX1	-1.46899	-4.56758	8.38529e-06	0.00404486	8.38529e-06	0.007	0.0233258
chr11:93911856_rs2282655	TCONS_00005580_PANX1	1.46899	4.56758	8.38529e-06	0.00404486	8.38529e-06	0.007	0.0233258
chr11:9325260_rs10770014	TCONS_00005940_DENND5A	-1.04898	-4.55144	8.9927e-06	0.00429756	8.9927e-06	0.007	0.0233258
chr2:61395673_rs147685382	TCONS_00017671_C2orf74	-9.24307	-4.54614	9.20092e-06	0.00858924	9.20092e-06	0.007	0.0233258
chr2:61395673_rs147685382	TCONS_00017672_C2orf74	9.24307	4.54614	9.20092e-06	0.00858924	9.20092e-06	0.007	0.0233258
chr12:110353820_rs16940683	TCONS_00008150_GIT2	1.78758	4.52862	9.92422e-06	0.00646136	9.92422e-06	0.007	0.0233258
chr2:198210558_rs7574271	TCONS_00019566_HSPD1	2.74419	4.41815	1.59089e-05	0.0135061	1.59089e-05	0.007	0.0233258
chr11:2148771_rs4261263	TCONS_00005870_IGF2	1.96315	4.9323	1.64518e-06	0.000933368	1.64518e-06	0.008	0.0262245
chr10:15139633_rs3858175	TCONS_00003572_RPP38	-10.0337	-4.74567	3.82929e-06	0.00180086	3.82929e-06	0.008	0.0262245
chr10:15139633_rs3858175	TCONS_00003571_RPP38	10.0337	4.74567	3.82929e-06	0.00180086	3.82929e-06	0.008	0.0262245
chr6:36329945_rs7739480	TCONS_00028160_ETV7	-2.51632	-4.67745	5.18371e-06	0.00109629	5.18371e-06	0.008	0.0262245
chr3:186722362_rs17775791	TCONS_00023102_ST6GAL1	-4.04783	-4.66517	5.47239e-06	0.00321822	5.47239e-06	0.008	0.0262245
chr19:5784370_rs2446212	TCONS_00082368_add_FEM1A	6.42057	4.65074	5.83127e-06	0.00759226	5.83127e-06	0.008	0.0262245
chr19:5784370_rs2446212	TCONS_00082369_add_FEM1A	-6.42057	-4.65074	5.83127e-06	0.00759226	5.83127e-06	0.008	0.0262245
chr17:5400750_rs55881499	TCONS_00012641_MIS12	4.1348	4.6343	6.26769e-06	0.0050771	6.26769e-06	0.008	0.0262245
chr5:132361894_rs3885730	TCONS_00026341_ZCCHC10	-3.04771	-4.58299	7.8422e-06	0.00595509	7.8422e-06	0.008	0.0262245
chr5:132361894_rs3885730	TCONS_00026342_ZCCHC10	3.04771	4.58299	7.8422e-06	0.00595509	7.8422e-06	0.008	0.0262245
chr12:107350988_rs11113150	TCONS_00007366_C12orf23	-10.1418	-4.57583	8.09018e-06	0.00544792	8.09018e-06	0.008	0.0262245
chr1:222910211_rs73126814	TCONS_00003246_AIDA	4.72376	4.54542	9.22965e-06	0.00613922	9.22965e-06	0.008	0.0262245
chr1:222910211_rs73126814	TCONS_00003244_AIDA	-4.72376	-4.54542	9.22965e-06	0.00613922	9.22965e-06	0.008	0.0262245
chr4:26179220_rs28540129	TCONS_00024202_RBPJ	-4.06816	-4.54232	9.35449e-06	0.00453799	9.35449e-06	0.008	0.0262245
chr1:9170435_rs12722741	TCONS_00001997_GPR157	6.4629	4.52966	9.87959e-06	0.00651714	9.87959e-06	0.008	0.0262245
chr10:32404566_rs142862094	TCONS_00004348_ARHGAP12	12.2521	4.52297	1.01688e-05	0.00430982	1.01688e-05	0.008	0.0262245
chr3:122568856_rs2082272	TCONS_00022750_DIRC2	-2.44976	-4.51825	1.03777e-05	0.00571768	1.03777e-05	0.008	0.0262245
chr3:122568856_rs2082272	TCONS_00022749_DIRC2	2.44976	4.51825	1.03777e-05	0.00571768	1.03777e-05	0.008	0.0262245
chr1:112073864_rs10776731	TCONS_00000744_CTTNBP2NL	-2.21697	-4.51583	1.04859e-05	0.00685085	1.04859e-05	0.008	0.0262245
chr1:227125997_rs7513120	TCONS_00001768_ADCK3	-2.60922	-4.50781	1.08541e-05	0.00705783	1.08541e-05	0.008	0.0262245
chr4:1024726_rs4450872	TCONS_00128714_add_MYL5	-4.97385	-4.5056	1.09574e-05	0.00519921	1.09574e-05	0.008	0.0262245
chr7:108110529_rs13312593	TCONS_00030066_PNPLA8	6.15599	4.46358	1.31163e-05	0.00518343	1.31163e-05	0.008	0.0262245
chr7:108110529_rs13312593	TCONS_00030065_PNPLA8	-6.15599	-4.46358	1.31163e-05	0.00518343	1.31163e-05	0.008	0.0262245
chr1:153606387_rs1888115	TCONS_00000982_CHTOP	1.73105	4.45075	1.38535e-05	0.00871092	1.38535e-05	0.008	0.0262245
chr1:27547752_rs112049446	TCONS_00000269_ARID1A	-6.54045	-4.44049	1.4471e-05	0.00905098	1.4471e-05	0.008	0.0262245
chr7:74096132_rs2527363	TCONS_00029850_NCF1C	2.71811	4.42351	1.55519e-05	0.0060007	1.55519e-05	0.008	0.0262245
chr5:44125846_rs72755310	TCONS_00026127_PAIP1	2.79692	4.38927	1.79725e-05	0.0120848	1.79725e-05	0.008	0.0262245
chr1:970215_rs9442364	TCONS_00001865_HES4	-2.44643	-4.37952	1.87251e-05	0.0112366	1.87251e-05	0.008	0.0262245
chr17:27895528_rs497993	TCONS_00012934_TP53I13	2.16819	4.17709	4.32146e-05	0.0279707	4.32146e-05	0.008	0.0262245
chr10:14052850_rs12777331	TCONS_00004263_FRMD4A	-5.12551	-4.77747	3.32154e-06	0.00158815	3.32154e-06	0.009	0.0290304
chr7:151706109_rs4726132	TCONS_00030326_KMT2C	-3.49792	-4.77051	3.42678e-06	0.00156631	3.42678e-06	0.009	0.0290304
chr3:194021361_rs58853961	TCONS_00024007_ATP13A3	9.38936	4.70863	4.51549e-06	0.00270297	4.51549e-06	0.009	0.0290304
chr3:194021361_rs58853961	TCONS_00024006_ATP13A3	-9.38936	-4.70863	4.51549e-06	0.00270297	4.51549e-06	0.009	0.0290304
chr19:36168663_rs10413852	TCONS_00016779_IGFLR1	-1.74078	-4.69331	4.83264e-06	0.00646278	4.83264e-06	0.009	0.0290304
chr19:39103764_rs34979870	TCONS_00015711_NFKBIB	2.97265	4.66345	5.51391e-06	0.00723582	5.51391e-06	0.009	0.0290304
chr19:39103764_rs34979870	TCONS_00015710_NFKBIB	-2.97265	-4.66345	5.51391e-06	0.00723582	5.51391e-06	0.009	0.0290304
chr4:38819403_rs66819621	TCONS_00024742_TLR1	-13.9314	-4.60755	7.0462e-06	0.00352533	7.0462e-06	0.009	0.0290304
chr4:38819403_rs66819621	TCONS_00024745_TLR1	13.9314	4.60755	7.0462e-06	0.00352533	7.0462e-06	0.009	0.0290304
chr19:13234145_rs62109911	TCONS_00016636_STX10	3.05205	4.56471	8.49007e-06	0.010527	8.49007e-06	0.009	0.0290304
chr1:21810587_rs3010180	TCONS_00000954_add_NBPF3	9.38971	4.54402	9.28592e-06	0.00617341	9.28592e-06	0.009	0.0290304
chr15:77416549_rs17466989	TCONS_00011023_PEAK1	4.28629	4.5209	1.02597e-05	0.00616092	1.02597e-05	0.009	0.0290304
chr16:16637013_rs2106568	TCONS_00011371_NOMO3	-23.4118	-4.50373	1.10456e-05	0.0100755	1.10456e-05	0.009	0.0290304
chr16:16637013_rs2106568	TCONS_00011369_NOMO3	23.4118	4.50373	1.10456e-05	0.0100755	1.10456e-05	0.009	0.0290304
chr11:18352433_rs60889939	TCONS_00004920_GTF2H1	1.98894	4.49304	1.1564e-05	0.00525754	1.1564e-05	0.009	0.0290304
chr11:18352433_rs60889939	TCONS_00004921_GTF2H1	-1.98894	-4.49304	1.1564e-05	0.00525754	1.1564e-05	0.009	0.0290304
chr2:191850566_rs2280233	TCONS_00019538_STAT1	-0.283496	-4.47847	1.23084e-05	0.0109466	1.23084e-05	0.009	0.0290304
chr2:191850566_rs2280233	TCONS_00019544_STAT1	0.283496	4.47847	1.23084e-05	0.0109466	1.23084e-05	0.009	0.0290304
chr2:217172384_rs16855891	TCONS_00103554_add_DIRC3	11.5386	4.46925	1.28031e-05	0.0113117	1.28031e-05	0.009	0.0290304
chr14:70459712_rs227418	TCONS_00009385_PCNX	-2.65888	-4.43869	1.45822e-05	0.00983467	1.45822e-05	0.009	0.0290304
chr6:26122502_rs198825	TCONS_00026872_HIST1H2AC	-2.90729	-4.40773	1.66254e-05	0.00312536	1.66254e-05	0.009	0.0290304
chr16:67013084_rs8063817	TCONS_00011798_CBFB	3.50745	4.38042	1.8654e-05	0.0159939	1.8654e-05	0.009	0.0290304
chr17:61887693_rs2727295	TCONS_00013385_DDX42	1.9301	4.35011	2.11832e-05	0.0150737	2.11832e-05	0.009	0.0290304
chr8:91019051_rs34394839	TCONS_00031133_NBN	1.39157	4.33528	2.25373e-05	0.0134254	2.25373e-05	0.009	0.0290304
chr10:69551141_rs717976	TCONS_00003775_SIRT1	-2.40937	-4.2702	2.95239e-05	0.0108882	2.95239e-05	0.009	0.0290304
chr10:69551141_rs717976	TCONS_00003773_SIRT1	2.40937	4.2702	2.95239e-05	0.0108882	2.95239e-05	0.009	0.0290304
chr3:53244333_rs35028414	TCONS_00023481_PBRM1	-2.37872	-4.2682	2.9768e-05	0.0142966	2.9768e-05	0.009	0.0290304
chr3:53244333_rs35028414	TCONS_00023492_PBRM1	2.37872	4.2682	2.9768e-05	0.0142966	2.9768e-05	0.009	0.0290304
chr9:71718348_rs28608975	TCONS_00031656_CBWD3	-1.0104	-4.2545	3.1497e-05	0.0178484	3.1497e-05	0.009	0.0290304
chr6:149909491_rs9322188	TCONS_00027614_PCMT1	1.74729	4.81617	2.79085e-06	0.000627105	2.79085e-06	0.01	0.0316962
chr6:149909491_rs9322188	TCONS_00027615_PCMT1	-1.74729	-4.81617	2.79085e-06	0.000627105	2.79085e-06	0.01	0.0316962
chr8:72961454_rs4737338	TCONS_00167258_add_TRPA1	-8.85016	-4.72554	4.18866e-06	0.00318952	4.18866e-06	0.01	0.0316962
chr8:18712513_rs748208	TCONS_00166471_add_PSD3	1.95078	4.68975	4.90954e-06	0.00364548	4.90954e-06	0.01	0.0316962
chr10:30782289_rs603805	TCONS_00003654_MAP3K8	-1.05418	-4.65412	5.74517e-06	0.00260002	5.74517e-06	0.01	0.0316962
chr8:18068835_rs2410545	TCONS_00030426_NAT1	3.11481	4.64806	5.90044e-06	0.00428962	5.90044e-06	0.01	0.0316962
chr18:72165058_rs8083001	TCONS_00014916_CNDP2	-1.64327	-4.61549	6.8059e-06	0.010864	6.8059e-06	0.01	0.0316962
chr14:24806229_rs724165	TCONS_00009745_RIPK3	-1.43207	-4.60824	7.02481e-06	0.0051693	7.02481e-06	0.01	0.0316962
chr14:24806229_rs724165	TCONS_00009744_RIPK3	1.43207	4.60824	7.02481e-06	0.0051693	7.02481e-06	0.01	0.0316962
chr2:231237459_rs12694849	TCONS_00018616_SP140L	2.8016	4.6045	7.14048e-06	0.00692119	7.14048e-06	0.01	0.0316962
chr8:139266412_rs4909767	TCONS_00168135_add_FAM135B	13.4272	4.59327	7.49886e-06	0.00530096	7.49886e-06	0.01	0.0316962
chr7:155411831_rs11765357	TCONS_00029534_RBM33	1.55416	4.58246	7.86017e-06	0.00329364	7.86017e-06	0.01	0.0316962
chr4:8511223_rs3103067	TCONS_00129167_add_TRMT44	6.9341	4.57255	8.20615e-06	0.00402781	8.20615e-06	0.01	0.0316962
chr19:50187079_rs7260179	TCONS_00017059_PNKP	2.97845	4.53734	9.5577e-06	0.0117067	9.5577e-06	0.01	0.0316962
chr19:50187079_rs7260179	TCONS_00017060_PNKP	-2.97845	-4.53734	9.5577e-06	0.0117067	9.5577e-06	0.01	0.0316962
chr22:24188193_rs59315374	TCONS_00021738_CHCHD10	-5.248	-4.53219	9.77227e-06	0.00562996	9.77227e-06	0.01	0.0316962
chr22:24188193_rs59315374	TCONS_00021737_CHCHD10	5.248	4.53219	9.77227e-06	0.00562996	9.77227e-06	0.01	0.0316962
chr3:133602114_rs55992705	TCONS_00023843_TOPBP1	8.52423	4.52644	1.00177e-05	0.00553794	1.00177e-05	0.01	0.0316962
chr7:150504840_rs12703101	TCONS_00029457_TMEM176A	-7.12236	-4.52572	1.00488e-05	0.00409887	1.00488e-05	0.01	0.0316962
chr7:150070630_rs1051760	TCONS_00029440_REPIN1	-2.54998	-4.52139	1.0238e-05	0.00416417	1.0238e-05	0.01	0.0316962
chr17:62524009_rs187514354	TCONS_00014434_DDX5	-3.37425	-4.48383	1.20293e-05	0.00907875	1.20293e-05	0.01	0.0316962
chr1:40810783_rs12094918	TCONS_00000437_SMAP2	-1.82877	-4.48376	1.20329e-05	0.00770604	1.20329e-05	0.01	0.0316962
chr9:94647600_rs6479378	TCONS_00032389_AUH	-1.77888	-4.47918	1.22708e-05	0.00805713	1.22708e-05	0.01	0.0316962
chr11:73009432_rs7115806	TCONS_00005524_ARHGEF17	-1.7189	-4.45199	1.37803e-05	0.00614143	1.37803e-05	0.01	0.0316962
chr11:73009432_rs7115806	TCONS_00005523_ARHGEF17	1.7189	4.45199	1.37803e-05	0.00614143	1.37803e-05	0.01	0.0316962
chr3:87867947_rs77330397	TCONS_00023660_CGGBP1	4.65345	4.42211	1.56445e-05	0.00825159	1.56445e-05	0.01	0.0316962
chr19:11707458_rs10424332	TCONS_00016579_ACP5	2.04092	4.34508	2.1633e-05	0.0239571	2.1633e-05	0.01	0.0316962
chr2:225817312_rs13395896	TCONS_00019668_DOCK10	2.74445	4.3106	2.49768e-05	0.0193403	2.49768e-05	0.01	0.0316962
chr6:126151883_rs76835359	TCONS_00027521_NCOA7	1.13767	4.20626	3.83793e-05	0.00658895	3.83793e-05	0.01	0.0316962
chr12:49737114_rs12306866	TCONS_00006961_SMARCD1	4.10469	4.20136	3.9153e-05	0.0208752	3.9153e-05	0.01	0.0316962
chr12:49737114_rs12306866	TCONS_00006960_SMARCD1	-4.10469	-4.20136	3.9153e-05	0.0208752	3.9153e-05	0.01	0.0316962
chr11:47626492_rs10769282	TCONS_00006100_FNBP4	-1.24361	-4.17913	4.28587e-05	0.0165555	4.28587e-05	0.01	0.0316962
chr11:124078705_rs11219500	TCONS_00029454_add_OR8G1	-0.587457	-4.8706	2.18093e-06	0.00120397	2.18093e-06	0.011	0.0341982
chr12:109013956_rs73191242	TCONS_00008121_SELPLG	9.8439	4.8463	2.43535e-06	0.00186805	2.43535e-06	0.011	0.0341982
chr1:11883731_rs12567136	TCONS_00002017_MTHFR	-8.09639	-4.71837	4.32434e-06	0.00318031	4.32434e-06	0.011	0.0341982
chr9:138582155_rs535555	TCONS_00032752_SDCCAG3	15.4442	4.66003	5.59768e-06	0.0040621	5.59768e-06	0.011	0.0341982
chr9:662216_rs10975628	TCONS_00031486_KANK1	7.59012	4.65568	5.70578e-06	0.00412764	5.70578e-06	0.011	0.0341982
chr17:76996508_rs80269200	TCONS_00014588_CANT1	-3.88289	-4.65217	5.79475e-06	0.00474137	5.79475e-06	0.011	0.0341982
chr1:11883731_rs12567136	TCONS_00002018_MTHFR	1.86535	4.60967	6.9813e-06	0.0048501	6.9813e-06	0.011	0.0341982
chr9:73307991_rs12344255	TCONS_00174936_add_TRPM3	5.06351	4.59712	7.37427e-06	0.00515072	7.37427e-06	0.011	0.0341982
chr7:29070209_rs7313	TCONS_00029658_CPVL	0.682375	4.59004	7.60529e-06	0.00320606	7.60529e-06	0.011	0.0341982
chr7:29070209_rs7313	TCONS_00029659_CPVL	-0.682375	-4.59004	7.60529e-06	0.00320606	7.60529e-06	0.011	0.0341982
chr17:7924746_rs57490393	TCONS_00012749_ACAP1	2.43337	4.52436	1.01078e-05	0.00777669	1.01078e-05	0.011	0.0341982
chr17:7924746_rs57490393	TCONS_00012750_ACAP1	-2.43337	-4.52436	1.01078e-05	0.00777669	1.01078e-05	0.011	0.0341982
chr2:231385874_rs1479178	TCONS_00018622_SP100	1.09717	4.52306	1.01648e-05	0.00933909	1.01648e-05	0.011	0.0341982
chr6:111269630_rs12215982	TCONS_00027475_GTF3C6	3.07637	4.50157	1.11489e-05	0.00218519	1.11489e-05	0.011	0.0341982
chr6:111269630_rs12215982	TCONS_00027478_GTF3C6	-3.07637	-4.50157	1.11489e-05	0.00218519	1.11489e-05	0.011	0.0341982
chr3:133782693_rs188191567	TCONS_00023841_TOPBP1	15.4577	4.474	1.25459e-05	0.0067605	1.25459e-05	0.011	0.0341982
chr1:64932010_rs114990734	TCONS_00000547_DNAJC6	-8.4236	-4.46094	1.3265e-05	0.00838751	1.3265e-05	0.011	0.0341982
chr14:51191734_rs1599969	TCONS_00009823_NIN	-1.61967	-4.45433	1.36441e-05	0.0093243	1.36441e-05	0.011	0.0341982
chr7:107304628_rs2701687	TCONS_00029231_HBP1	-1.72533	-4.41936	1.58276e-05	0.00608988	1.58276e-05	0.011	0.0341982
chr6:100734930_rs9399482	TCONS_00028336_ASCC3	2.36194	4.41304	1.62565e-05	0.00306355	1.62565e-05	0.011	0.0341982
chr22:39419483_rs5757425	TCONS_00021548_GTPBP1	1.9675	4.39701	1.73953e-05	0.00907007	1.73953e-05	0.011	0.0341982
chr16:335619_rs45612235	TCONS_00011983_LUC7L	-7.33772	-4.38561	1.82514e-05	0.0156892	1.82514e-05	0.011	0.0341982
chr8:101555996_rs17428985	TCONS_00165026_add_SPAG1	5.47497	4.36134	2.021e-05	0.0121974	2.021e-05	0.011	0.0341982
chr9:132258867_rs10156524	TCONS_00031984_LRRC8A	23.8394	4.34632	2.15218e-05	0.0130628	2.15218e-05	0.011	0.0341982
chr9:132258867_rs10156524	TCONS_00031985_LRRC8A	-23.8394	-4.34632	2.15218e-05	0.0130628	2.15218e-05	0.011	0.0341982
chr2:192511785_rs7581795	TCONS_00018288_NABP1	-1.25444	-4.34495	2.16451e-05	0.0173167	2.16451e-05	0.011	0.0341982
chr1:154663374_rs11264242	TCONS_00002787_CRTC2	4.94301	4.32284	2.37364e-05	0.0137171	2.37364e-05	0.011	0.0341982
chr1:154663374_rs11264242	TCONS_00002788_CRTC2	-4.94301	-4.32284	2.37364e-05	0.0137171	2.37364e-05	0.011	0.0341982
chr1:151392944_rs10749662	TCONS_00000949_SETDB1	-7.0778	-4.3216	2.38595e-05	0.0137784	2.38595e-05	0.011	0.0341982
chr1:28975557_rs9426392	TCONS_00002147_EYA3	4.85398	4.28781	2.74521e-05	0.0155081	2.74521e-05	0.011	0.0341982
chr1:28975557_rs9426392	TCONS_00002148_EYA3	-4.85398	-4.28781	2.74521e-05	0.0155081	2.74521e-05	0.011	0.0341982
chr9:71130978_rs265089	TCONS_00032303_CBWD3	3.82127	4.253	3.16919e-05	0.0179442	3.16919e-05	0.011	0.0341982
chr1:27995518_rs115206960	TCONS_00002144_IFI6	-0.84686	-4.18183	4.23915e-05	0.0222664	4.23915e-05	0.011	0.0341982
chr1:27995518_rs115206960	TCONS_00002145_IFI6	0.84686	4.18183	4.23915e-05	0.0222664	4.23915e-05	0.011	0.0341982
chr4:145663214_rs75642683	TCONS_00133508_add_GYPB	30.817	4.1624	4.5864e-05	0.0179562	4.5864e-05	0.011	0.0341982
chr18:19945286_rs113268109	TCONS_00079638_add_GREB1L	-1.99424	-4.15095	4.80378e-05	0.0656328	4.80378e-05	0.011	0.0341982
chr14:21004037_rs1243705	TCONS_00009087_METTL17	4.03959	4.68513	5.0108e-06	0.00391257	5.0108e-06	0.012	0.0367789
chr12:70955881_rs7969714	TCONS_00037698_add_FRS2	-5.32321	-4.60146	7.23596e-06	0.00493214	7.23596e-06	0.012	0.0367789
chr2:231331896_rs1050224	TCONS_00018621_SP100	1.24834	4.59569	7.42026e-06	0.00714674	7.42026e-06	0.012	0.0367789
chr4:56071800_rs66764663	TCONS_00024255_SRD5A3	-1.08858	-4.5803	7.93452e-06	0.00390636	7.93452e-06	0.012	0.0367789
chr17:35591407_rs2590727	TCONS_00013059_GGNBP2	-5.92049	-4.57572	8.09387e-06	0.00637835	8.09387e-06	0.012	0.0367789
chr20:2645199_rs6138735	TCONS_00020290_IDH3B	-3.08886	-4.56002	8.66474e-06	0.00455293	8.66474e-06	0.012	0.0367789
chr20:2645199_rs6138735	TCONS_00020289_IDH3B	3.08886	4.56002	8.66474e-06	0.00455293	8.66474e-06	0.012	0.0367789
chr1:161187665_rs2070902	TCONS_00002979_PFDN2	-0.854056	-4.55537	8.84073e-06	0.00592236	8.84073e-06	0.012	0.0367789
chr7:150070814_rs1051823	TCONS_00029437_REPIN1	1.48939	4.55114	9.00424e-06	0.0037155	9.00424e-06	0.012	0.0367789
chr8:61912812_rs35695994	TCONS_00167063_add_CA8	-1.69703	-4.54489	9.25107e-06	0.00634797	9.25107e-06	0.012	0.0367789
chr19:50428233_rs1273685	TCONS_00017178_IL4I1	0.705091	4.53778	9.53967e-06	0.0116917	9.53967e-06	0.012	0.0367789
chr3:10800401_rs1655664	TCONS_00022217_IL17RC	-10.0417	-4.50276	1.10919e-05	0.00607479	1.10919e-05	0.012	0.0367789
chr3:10800401_rs1655664	TCONS_00022216_IL17RC	10.0417	4.50276	1.10919e-05	0.00607479	1.10919e-05	0.012	0.0367789
chr20:884841_rs6108134	TCONS_00019782_ZCCHC3	-4.30144	-4.48593	1.19217e-05	0.0060732	1.19217e-05	0.012	0.0367789
chr20:884841_rs6108134	TCONS_00019783_ZCCHC3	4.30144	4.48593	1.19217e-05	0.0060732	1.19217e-05	0.012	0.0367789
chr22:25131425_rs8139987	TCONS_00021345_ADORA2A	6.08418	4.4811	1.2171e-05	0.00669797	1.2171e-05	0.012	0.0367789
chr2:218367797_rs62175503	TCONS_00019626_TNS1	-9.91076	-4.46982	1.27715e-05	0.0112923	1.27715e-05	0.012	0.0367789
chr8:144647928_rs12541647	TCONS_00030789_GSDMD	1.43702	4.46176	1.32187e-05	0.00853847	1.32187e-05	0.012	0.0367789
chr3:127306462_rs79983121	TCONS_00023795_TPRA1	4.61884	4.45262	1.37437e-05	0.0073394	1.37437e-05	0.012	0.0367789
chr3:127306462_rs79983121	TCONS_00023798_TPRA1	-4.61884	-4.45262	1.37437e-05	0.0073394	1.37437e-05	0.012	0.0367789
chr9:139059275_rs10114437	TCONS_00032750_CARD9	-1.75752	-4.44114	1.44314e-05	0.0092777	1.44314e-05	0.012	0.0367789
chr11:63381877_rs3809073	TCONS_00006289_PLA2G16	4.54829	4.39893	1.72547e-05	0.00750143	1.72547e-05	0.012	0.0367789
chr11:63381877_rs3809073	TCONS_00006290_PLA2G16	-4.54829	-4.39893	1.72547e-05	0.00750143	1.72547e-05	0.012	0.0367789
chr7:100548273_rs4326315	TCONS_00029135_STAG3	1.57779	4.29831	2.6284e-05	0.0093502	2.6284e-05	0.012	0.0367789
chr7:98304349_rs73711739	TCONS_00155546_add_ZNF789	3.51373	4.27197	2.93096e-05	0.0102708	2.93096e-05	0.012	0.0367789
chr5:131427161_rs152125	TCONS_00026324_P4HA2	-2.87221	-4.25907	3.09105e-05	0.0187566	3.09105e-05	0.012	0.0367789
chr1:149772504_rs5011222	TCONS_00002687_APH1A	2.17485	4.06638	6.74138e-05	0.0326438	6.74138e-05	0.012	0.0367789
chr7:94892967_rs59421851	TCONS_00159755_add_PDK4	-8.72177	-6.14562	3.9196e-09	3.43537e-06	3.9196e-09	0.013	0.0391257
chr12:6805206_rs73266929	TCONS_00006799_C1S	-11.9986	-4.95268	1.49802e-06	0.00121929	1.49802e-06	0.013	0.0391257
chr12:6805206_rs73266929	TCONS_00006800_C1S	11.9986	4.95268	1.49802e-06	0.00121929	1.49802e-06	0.013	0.0391257
chr4:15703258_rs113618320	TCONS_00024692_FBXL5	4.56733	4.65095	5.8259e-06	0.0029848	5.8259e-06	0.013	0.0391257
chr4:15703258_rs113618320	TCONS_00024690_FBXL5	-4.56733	-4.65095	5.8259e-06	0.0029848	5.8259e-06	0.013	0.0391257
chr9:113792997_rs3739706	TCONS_00032467_LPAR1	-9.79496	-4.59856	7.32801e-06	0.00512612	7.32801e-06	0.013	0.0391257
chr20:44447775_rs433031	TCONS_00020092_DNTTIP1	-4.26448	-4.58299	7.84211e-06	0.00414004	7.84211e-06	0.013	0.0391257
chr20:44447775_rs433031	TCONS_00020093_DNTTIP1	4.26448	4.58299	7.84211e-06	0.00414004	7.84211e-06	0.013	0.0391257
chr19:50385031_rs7248744	TCONS_00017067_AKT1S1	1.26941	4.48876	1.1778e-05	0.0141018	1.1778e-05	0.013	0.0391257
chr9:114361659_rs41279067	TCONS_00032484_PTGR1	8.4298	4.47937	1.22613e-05	0.00805297	1.22613e-05	0.013	0.0391257
chr19:12651370_rs8103572	TCONS_00015425_NFIX	19.0947	4.47325	1.25862e-05	0.0149536	1.25862e-05	0.013	0.0391257
chr19:12651370_rs8103572	TCONS_00015426_NFIX	-19.0947	-4.47325	1.25862e-05	0.0149536	1.25862e-05	0.013	0.0391257
chr6:31630831_rs114751574	TCONS_00027967_PBX2	2.36935	4.47082	1.27175e-05	0.00246216	1.27175e-05	0.013	0.0391257
chr1:6977200_rs1892261	TCONS_00001960_RPL22	-0.972887	-4.45913	1.33677e-05	0.0084446	1.33677e-05	0.013	0.0391257
chr1:6977200_rs1892261	TCONS_00001961_RPL22	0.972887	4.45913	1.33677e-05	0.0084446	1.33677e-05	0.013	0.0391257
chr16:89793555_rs2099105	TCONS_00064134_add_ZNF276	-3.89735	-4.45433	1.3644e-05	0.012127	1.3644e-05	0.013	0.0391257
chr7:128861075_rs73477651	TCONS_00029357_STRIP2	3.3227	4.41739	1.59604e-05	0.00613361	1.59604e-05	0.013	0.0391257
chr7:128861075_rs73477651	TCONS_00029358_STRIP2	-3.3227	-4.41739	1.59604e-05	0.00613361	1.59604e-05	0.013	0.0391257
chr4:160231403_rs72699401	TCONS_00024587_RAPGEF2	-1.88694	-4.40343	1.69307e-05	0.00765351	1.69307e-05	0.013	0.0391257
chr15:71703827_rs35270398	TCONS_00010953_PARP6	1.56831	4.39911	1.72418e-05	0.00959572	1.72418e-05	0.013	0.0391257
chr3:170638459_rs2422132	TCONS_00023934_RPL22L1	3.91174	4.39141	1.78106e-05	0.00922058	1.78106e-05	0.013	0.0391257
chr17:62476429_rs61733782	TCONS_00013393_MILR1	6.12923	4.38133	1.85827e-05	0.0134596	1.85827e-05	0.013	0.0391257
chr10:52716998_rs72787086	TCONS_00004426_SGMS1	2.64085	4.35444	2.0803e-05	0.00802197	2.0803e-05	0.013	0.0391257
chr9:130892285_rs10760540	TCONS_00031951_SLC25A25	2.21887	4.32131	2.38883e-05	0.0142269	2.38883e-05	0.013	0.0391257
chr7:85233391_rs7779467	TCONS_00029893_SEMA3D	1.01453	4.30643	2.54124e-05	0.00908105	2.54124e-05	0.013	0.0391257
chr16:21778925_rs57292251	TCONS_00012166_RRN3P1	13.6835	4.29992	2.6109e-05	0.0214013	2.6109e-05	0.013	0.0391257
chr7:115809732_rs6978849	TCONS_00030106_TFEC	1.06618	4.27898	2.84735e-05	0.0100128	2.84735e-05	0.013	0.0391257
chr10:35255880_rs34867152	TCONS_00003670_CREM	-1.93092	-4.27573	2.88582e-05	0.0106628	2.88582e-05	0.013	0.0391257
chr4:123076759_rs28681603	TCONS_00024480_KIAA1109	2.82551	4.27458	2.89945e-05	0.0122327	2.89945e-05	0.013	0.0391257
chr12:50253515_rs7133995	TCONS_00006964_LARP4	-4.59038	-4.24451	3.28174e-05	0.0179757	3.28174e-05	0.013	0.0391257
chr12:111355606_rs3782888	TCONS_00008164_HVCN1	-9.73903	-4.20996	3.78036e-05	0.0202611	3.78036e-05	0.013	0.0391257
chr10:45364855_rs189203940	TCONS_00004399_MARCH8	-6.99139	-4.20335	3.88373e-05	0.0134899	3.88373e-05	0.013	0.0391257
chr18:19672259_rs9954367	TCONS_00079642_add_GREB1L	-1.95389	-4.12264	5.384e-05	0.0717003	5.384e-05	0.013	0.0391257
chr3:50190346_rs6800021	TCONS_00022468_APEH	-2.33603	-3.96899	9.89416e-05	0.0394763	9.89416e-05	0.013	0.0391257
chr3:50190346_rs6800021	TCONS_00022469_APEH	2.33603	3.96899	9.89416e-05	0.0394763	9.89416e-05	0.013	0.0391257
chr12:105165844_rs2101758	TCONS_00008104_SLC41A2	-0.854	-4.49377	1.15278e-05	0.00736629	1.15278e-05	0.014	0.0417484
chr12:105165844_rs2101758	TCONS_00008098_SLC41A2	0.854	4.49377	1.15278e-05	0.00736629	1.15278e-05	0.014	0.0417484
chr8:116471025_rs1180648	TCONS_00031216_TRPS1	-2.36625	-4.43034	1.51079e-05	0.00957533	1.51079e-05	0.014	0.0417484
chr2:113941979_rs11691322	TCONS_00017992_LOC654433	4.4656	4.42716	1.53132e-05	0.0130864	1.53132e-05	0.014	0.0417484
chr9:22165583_rs1333054	TCONS_00170413_add_CDKN2B-AS1	-1.81119	-4.42584	1.53993e-05	0.00981345	1.53993e-05	0.014	0.0417484
chr5:78897677_rs62364123	TCONS_00025587_PAPD4	1.86799	4.41511	1.6115e-05	0.0110256	1.6115e-05	0.014	0.0417484
chr2:179382809_rs12618265	TCONS_00097378_add_TTN-AS1	-2.82399	-4.40906	1.65326e-05	0.0139453	1.65326e-05	0.014	0.0417484
chr22:17612750_rs5747001	TCONS_00021683_CECR1	0.865946	4.38571	1.82434e-05	0.00938668	1.82434e-05	0.014	0.0417484
chr22:17612750_rs5747001	TCONS_00021686_CECR1	-0.865946	-4.38571	1.82434e-05	0.00938668	1.82434e-05	0.014	0.0417484
chr18:33849043_rs2252668	TCONS_00014860_MOCOS	8.91283	4.34863	2.13151e-05	0.0312736	2.13151e-05	0.014	0.0417484
chr12:107961904_rs7963848	TCONS_00008111_PRDM4	13.8806	4.31813	2.42069e-05	0.0138776	2.42069e-05	0.014	0.0417484
chr12:107961904_rs7963848	TCONS_00008112_PRDM4	-13.8806	-4.31813	2.42069e-05	0.0138776	2.42069e-05	0.014	0.0417484
chr2:181811957_rs12165234	TCONS_00018241_SSFA2	-3.06147	-4.27753	2.86441e-05	0.02148	2.86441e-05	0.014	0.0417484
chr16:67359308_rs9931359	TCONS_00012368_TRADD	2.26077	4.22304	3.58366e-05	0.02789	3.58366e-05	0.014	0.0417484
chr16:67359308_rs9931359	TCONS_00012369_TRADD	-2.26077	-4.22304	3.58366e-05	0.02789	3.58366e-05	0.014	0.0417484
chr6:31178084_rs113998229	TCONS_00027019_MICA	1.18903	4.20883	3.7978e-05	0.006529	3.7978e-05	0.014	0.0417484
chr3:137459489_rs1816800	TCONS_00022834_NCK1	-2.26698	-4.0999	5.89784e-05	0.0254281	5.89784e-05	0.014	0.0417484
chr5:68795498_rs28493963	TCONS_00026171_GUSBP3	0.796148	4.00037	8.75046e-05	0.0439699	8.75046e-05	0.014	0.0417484
chr16:24901955_rs274079	TCONS_00012190_ARHGAP17	3.12136	4.60059	7.26355e-06	0.007016	7.26355e-06	0.015	0.0442563
chr7:22799667_rs10950916	TCONS_00028725_IL6	0.111313	4.58764	7.68515e-06	0.00323525	7.68515e-06	0.015	0.0442563
chr11:33905285_rs746483	TCONS_00004945_QSER1	3.63184	4.55787	8.74572e-06	0.00419736	8.74572e-06	0.015	0.0442563
chr10:11228512_rs670303	TCONS_00003535_CELF2	-1.97627	-4.55739	8.76377e-06	0.0037817	8.76377e-06	0.015	0.0442563
chr19:55185245_rs12973697	TCONS_00016206_LILRB4	1.07603	4.44237	1.4356e-05	0.0167778	1.4356e-05	0.015	0.0442563
chr9:125775860_rs34632256	TCONS_00032592_DENND1A	-2.27074	-4.42852	1.52255e-05	0.00972211	1.52255e-05	0.015	0.0442563
chr9:125775860_rs34632256	TCONS_00032594_DENND1A	2.27074	4.42852	1.52255e-05	0.00972211	1.52255e-05	0.015	0.0442563
chr13:36918289_rs9531841	TCONS_00008818_SPG20	-4.48845	-4.39006	1.79121e-05	0.0151751	1.79121e-05	0.015	0.0442563
chr5:118680395_rs17145230	TCONS_00025705_TNFAIP8	-1.41751	-4.34502	2.16388e-05	0.014028	2.16388e-05	0.015	0.0442563
chr10:50018419_rs2928403	TCONS_00003732_WDFY4	5.31262	4.33634	2.24379e-05	0.00856227	2.24379e-05	0.015	0.0442563
chr14:102776924_rs34267923	TCONS_00009557_PPP2R5C	-2.11684	-4.32848	2.31855e-05	0.0144092	2.31855e-05	0.015	0.0442563
chr7:110741577_rs17439799	TCONS_00029248_LRRN3	11.3087	4.31943	2.40762e-05	0.00867052	2.40762e-05	0.015	0.0442563
chr2:31985308_rs11683744	TCONS_00018866_MEMO1	-10.9921	-4.27543	2.88939e-05	0.0216356	2.88939e-05	0.015	0.0442563
chr2:25643944_rs17745923	TCONS_00017502_NCOA1	1.15132	4.26359	3.03398e-05	0.022531	3.03398e-05	0.015	0.0442563
chr7:87207128_rs1202178	TCONS_00029903_SRI	2.70468	4.25804	3.1041e-05	0.0108041	3.1041e-05	0.015	0.0442563
chr7:87207128_rs1202178	TCONS_00029904_SRI	-2.70468	-4.25804	3.1041e-05	0.0108041	3.1041e-05	0.015	0.0442563
chr8:144674558_rs7821226	TCONS_00031341_NAPRT1	-6.7064	-4.25521	3.14055e-05	0.0178982	3.14055e-05	0.015	0.0442563
chr8:144674558_rs7821226	TCONS_00031342_NAPRT1	6.7064	4.25521	3.14055e-05	0.0178982	3.14055e-05	0.015	0.0442563
chr14:68027809_rs12589605	TCONS_00009352_MPP5	7.78744	4.10935	5.67891e-05	0.0316485	5.67891e-05	0.015	0.0442563
chr10:75044498_rs148286030	TCONS_00003852_SEC24C	2.52192	4.08315	6.30605e-05	0.0200289	6.30605e-05	0.015	0.0442563
chr10:75044498_rs148286030	TCONS_00003853_SEC24C	-2.52192	-4.08315	6.30605e-05	0.0200289	6.30605e-05	0.015	0.0442563
chr5:180235737_rs11544558	TCONS_00026690_MGAT1	-2.86851	-4.56928	8.32357e-06	0.00626915	8.32357e-06	0.016	0.0467582
chr3:11647942_rs6793495	TCONS_00022240_ATG7	3.37205	4.52273	1.01794e-05	0.00561876	1.01794e-05	0.016	0.0467582
chr3:183598406_rs57299858	TCONS_00023972_PARL	-1.63228	-4.49707	1.13658e-05	0.00619333	1.13658e-05	0.016	0.0467582
chr3:183598406_rs57299858	TCONS_00023973_PARL	1.63228	4.49707	1.13658e-05	0.00619333	1.13658e-05	0.016	0.0467582
chr1:110172236_rs2269340	TCONS_00000704_GSTM2	-4.62968	-4.48218	1.21148e-05	0.0077524	1.21148e-05	0.016	0.0467582
chr17:4622880_rs2271167	TCONS_00073336_add_C17orf85	-2.59652	-4.43657	1.47138e-05	0.0108972	1.47138e-05	0.016	0.0467582
chr9:136502572_rs13284520	TCONS_00032708_RALGDS	3.77834	4.42977	1.51449e-05	0.00968518	1.51449e-05	0.016	0.0467582
chr16:74734867_rs877375	TCONS_00012439_MLKL	3.34006	4.41394	1.61948e-05	0.0141225	1.61948e-05	0.016	0.0467582
chr12:1727116_rs7953986	TCONS_00006736_WNT5B	1.94039	4.41226	1.63102e-05	0.00985358	1.63102e-05	0.016	0.0467582
chr6:25210711_rs142558493	TCONS_00026868_TRIM38	-3.15432	-4.40456	1.68498e-05	0.00316146	1.68498e-05	0.016	0.0467582
chr6:25210711_rs142558493	TCONS_00026867_TRIM38	3.15432	4.40456	1.68498e-05	0.00316146	1.68498e-05	0.016	0.0467582
chr9:131791145_rs7041665	TCONS_00032649_SH3GLB2	5.7701	4.39039	1.78874e-05	0.0111444	1.78874e-05	0.016	0.0467582
chr9:131791145_rs7041665	TCONS_00032650_SH3GLB2	-5.7701	-4.39039	1.78874e-05	0.0111444	1.78874e-05	0.016	0.0467582
chr8:8366348_rs35819495	TCONS_00030882_SGK223	2.864	4.37876	1.8785e-05	0.0114836	1.8785e-05	0.016	0.0467582
chr6:31597700_rs114316763	TCONS_00027012_TCF19	-8.92375	-4.33932	2.21605e-05	0.00404147	2.21605e-05	0.016	0.0467582
chr11:63301208_rs9633988	TCONS_00006255_C11orf48	-3.48095	-4.30397	2.56732e-05	0.0106159	2.56732e-05	0.016	0.0467582
chr11:63301208_rs9633988	TCONS_00006254_C11orf48	3.48095	4.30397	2.56732e-05	0.0106159	2.56732e-05	0.016	0.0467582
chr2:27748624_rs1260333	TCONS_00017532_NRBP1	1.11769	4.24057	3.33523e-05	0.0243989	3.33523e-05	0.016	0.0467582
[truncated: 21 more rows]

## Sheet: ifn 12PCs
SNP	gene	beta	t-stat	p-value	FDR	gene.p.min.p	emp.p	emp.q
chr12:113357193_rs10774671	TCONS_00007433_OAS1	-29.749	-98.3095	6.21199e-163	4.26732e-156	6.21199e-163	0.001	0.00409431
chr4:39457430_rs2687956	TCONS_00024757_RPL9	25.7451	79.8693	1.8643e-146	2.6888e-140	1.8643e-146	0.001	0.00409431
chr1:179863922_rs514421	TCONS_00001440_TOR1AIP1	45.4183	72.7684	3.95787e-139	4.50474e-132	3.95787e-139	0.001	0.00409431
chr1:39511454_rs7532528	TCONS_00000397_NDUFS5	26.885	64.7089	5.85677e-130	1.111e-123	5.85677e-130	0.001	0.00409431
chr1:39511454_rs7532528	TCONS_00000398_NDUFS5	-26.885	-64.7089	5.85677e-130	1.111e-123	5.85677e-130	0.001	0.00409431
chr3:39449137_rs1803893	TCONS_00022345_RPSA	45.1199	57.1468	2.37747e-120	4.29788e-114	2.37747e-120	0.001	0.00409431
chr3:39449137_rs1803893	TCONS_00022346_RPSA	-45.1199	-57.1468	2.37747e-120	4.29788e-114	2.37747e-120	0.001	0.00409431
chr7:128629471_rs11770317	TCONS_00029311_IRF5	32.4309	56.0649	6.96831e-119	4.53737e-113	6.96831e-119	0.001	0.00409431
chr14:100815146_rs7144866	TCONS_00010022_WARS	32.2607	53.9345	6.4126e-116	2.7258e-109	6.4126e-116	0.001	0.00409431
chr1:207923081_rs2761437	TCONS_00001665_CD46	25.4153	53.4456	3.17468e-115	4.05993e-110	3.17468e-115	0.001	0.00409431
chr12:113357193_rs10774671	TCONS_00007435_OAS1	43.0568	52.3366	1.25445e-113	4.30872e-107	1.25445e-113	0.001	0.00409431
chr16:2011126_rs758335	TCONS_00012017_TCRBV20S1	-19.2456	-50.9728	1.26792e-111	6.72799e-105	1.26792e-111	0.001	0.00409431
chr16:2011126_rs758335	TCONS_00012019_TCRBV20S1	26.9776	49.9432	4.44057e-110	1.17815e-103	4.44057e-110	0.001	0.00409431
chr7:128600869_rs60239254	TCONS_00029309_IRF5	-22.6858	-48.7152	3.35586e-108	8.56134e-103	3.35586e-108	0.001	0.00409431
chr14:100815146_rs7144866	TCONS_00010031_WARS	-25.0585	-47.9442	5.31901e-107	2.26095e-101	5.31901e-107	0.001	0.00409431
chr7:128602158_rs6948875	TCONS_00029319_IRF5	-24.3706	-47.7677	1.00661e-106	1.46999e-101	1.00661e-106	0.001	0.00409431
chr1:79094081_rs1333973	TCONS_00000600_IFI44L	-25.8617	-46.0248	6.10988e-104	5.00295e-99	6.10988e-104	0.001	0.00409431
chr9:32455320_rs7029002	TCONS_00032205_DDX58	-12.5713	-45.82	1.3149e-103	2.91557e-97	1.3149e-103	0.001	0.00409431
chr9:107505262_rs7034016	TCONS_00031818_NIPSNAP3A	-17.649	-45.7493	1.71447e-103	2.91557e-97	1.71447e-103	0.001	0.00409431
chr9:107505262_rs7034016	TCONS_00031819_NIPSNAP3A	17.649	45.7493	1.71447e-103	2.91557e-97	1.71447e-103	0.001	0.00409431
chr17:7525548_rs1017163	TCONS_00013776_SAT2	-15.1433	-45.1865	1.43384e-102	5.04425e-96	1.43384e-102	0.001	0.00409431
chr17:7161628_rs2521989	TCONS_00012735_ELP5	16.7923	44.6524	1.09798e-101	1.56311e-95	1.09798e-101	0.001	0.00409431
chr9:32455320_rs7029002	TCONS_00032198_DDX58	15.3324	43.5246	8.64425e-100	1.10251e-93	8.64425e-100	0.001	0.00409431
chr8:124158566_rs7006862	TCONS_00030733_WDR67	42.4102	42.6011	3.30992e-98	2.71522e-92	3.30992e-98	0.001	0.00409431
chr8:124158566_rs7006862	TCONS_00030734_WDR67	-42.4102	-42.6011	3.30992e-98	2.71522e-92	3.30992e-98	0.001	0.00409431
chr3:53207745_rs3773723	TCONS_00022565_PRKCD	16.9887	41.5739	2.05914e-96	1.28987e-90	2.05914e-96	0.001	0.00409431
chr7:128662511_rs7793851	TCONS_00029310_IRF5	14.619	40.8379	4.18022e-95	3.60009e-90	4.18022e-95	0.001	0.00409431
chr11:77659512_rs12284929	TCONS_00006459_INTS4	5.16781	40.6395	9.48117e-95	1.1152e-88	9.48117e-95	0.001	0.00409431
chr19:35506729_rs2290647	TCONS_00015644_GRAMD1A	-27.0214	-40.5417	1.42083e-94	2.28906e-88	1.42083e-94	0.001	0.00409431
chr1:79094081_rs1333973	TCONS_00000604_IFI44L	12.2145	39.6037	7.18362e-93	5.41471e-88	7.18362e-93	0.001	0.00409431
chr12:131315610_rs4759524	TCONS_00008403_STX2	-8.99275	-39.1401	5.13118e-92	8.83297e-86	5.13118e-92	0.001	0.00409431
chr5:96076487_rs7724759	TCONS_00025642_CAST	-10.0875	-38.0459	5.72081e-90	1.39122e-84	5.72081e-90	0.001	0.00409431
chr5:96076487_rs7724759	TCONS_00025624_CAST	10.0875	38.0459	5.72081e-90	1.39122e-84	5.72081e-90	0.001	0.00409431
chr7:92775019_rs28662	TCONS_00029945_SAMD9L	20.9648	36.9208	8.13705e-88	5.25585e-83	8.13705e-88	0.001	0.00409431
chr6:31555392_rs2256974	TCONS_00027044_LST1	-10.5976	-36.7492	1.75032e-87	1.32064e-80	1.75032e-87	0.001	0.00409431
chr10:33219679_rs17586210	TCONS_00004360_ITGB1	8.66081	35.5842	3.41795e-85	2.55035e-79	3.41795e-85	0.001	0.00409431
chr10:33219679_rs17586210	TCONS_00004361_ITGB1	-8.66081	-35.5842	3.41795e-85	2.55035e-79	3.41795e-85	0.001	0.00409431
chr12:58112189_rs799265	TCONS_00007188_OS9	5.62772	35.258	1.53186e-84	7.51649e-79	1.53186e-84	0.001	0.00409431
chr14:96846092_rs2053588	TCONS_00009537_GSKIP	-43.8658	-33.49	6.23504e-81	8.28227e-76	6.23504e-81	0.001	0.00409431
chr14:96846092_rs2053588	TCONS_00009536_GSKIP	43.8658	33.49	6.23504e-81	8.28227e-76	6.23504e-81	0.001	0.00409431
chr1:53432786_rs56222568	TCONS_00000519_SCP2	16.8321	32.9016	1.06356e-79	6.23975e-75	1.06356e-79	0.001	0.00409431
chr1:53432786_rs56222568	TCONS_00000520_SCP2	-16.8321	-32.9016	1.06356e-79	6.23975e-75	1.06356e-79	0.001	0.00409431
chr12:9869271_rs2268146	TCONS_00007662_CLECL1	-13.3955	-32.7761	1.95644e-79	7.90573e-74	1.95644e-79	0.001	0.00409431
chr14:91636395_rs4900071	TCONS_00009497_C14orf159	-37.6544	-32.4684	8.78173e-79	1.09812e-73	8.78173e-79	0.001	0.00409431
chr8:86130628_rs6990452	TCONS_00031122_C8orf59	-16.1915	-32.2772	2.24402e-78	7.12609e-73	2.24402e-78	0.001	0.00409431
chr8:86130628_rs6990452	TCONS_00031123_C8orf59	16.1915	32.2772	2.24402e-78	7.12609e-73	2.24402e-78	0.001	0.00409431
chr22:41608462_rs139445	TCONS_00021597_L3MBTL2	-30.3042	-32.0119	8.30109e-78	2.32004e-72	8.30109e-78	0.001	0.00409431
chr6:32630401_rs9274176	TCONS_00028024_HLA-DQB2	-40.1705	-31.9853	9.4692e-78	1.8773e-71	9.4692e-78	0.001	0.00409431
chr7:92775019_rs28662	TCONS_00029941_SAMD9L	-21.8245	-30.6615	7.27845e-75	4.17891e-70	7.27845e-75	0.001	0.00409431
chr6:32629110_rs9273608	TCONS_00027137_HLA-DQA1	51.9865	30.4688	1.94634e-74	9.79027e-69	1.94634e-74	0.001	0.00409431
chr6:32614360_rs115443066	TCONS_00027144_HLA-DQA1	-38.7217	-30.3745	3.15304e-74	1.18951e-68	3.15304e-74	0.001	0.00409431
chr22:41606264_rs7289286	TCONS_00021598_L3MBTL2	26.436	30.2767	5.20832e-74	3.9222e-69	5.20832e-74	0.001	0.00409431
chr19:55824586_rs4806659	TCONS_00017410_TMEM150B	7.74972	30.2757	5.23638e-74	1.12432e-68	5.23638e-74	0.001	0.00409431
chr20:34284689_rs6060564	TCONS_00020670_CPNE1	-16.2924	-29.4256	4.2927e-72	6.03346e-66	4.2927e-72	0.001	0.00409431
chr10:28812066_rs2998283	TCONS_00004327_WAC-AS1	-17.3721	-29.0424	3.21407e-71	8.1952e-66	3.21407e-71	0.001	0.00409431
chr19:51736383_rs33978622	TCONS_00015988_CD33	-13.0717	-28.5936	3.47367e-70	5.22324e-65	3.47367e-70	0.001	0.00409431
chr17:39942919_rs4796702	TCONS_00014087_JUP	12.9396	28.3294	1.4257e-69	4.50963e-64	1.4257e-69	0.001	0.00409431
chr19:55134267_rs8108712	TCONS_00016050_LILRA2	22.0536	28.173	3.30118e-69	4.48544e-64	3.30118e-69	0.001	0.00409431
chr19:55134267_rs8108712	TCONS_00016051_LILRA2	-22.0536	-28.173	3.30118e-69	4.48544e-64	3.30118e-69	0.001	0.00409431
chr1:197704717_rs17641524	TCONS_00003112_DENND1B	-10.186	-27.8633	1.75604e-68	9.29621e-64	1.75604e-68	0.001	0.00409431
chr19:57006415_rs17207481	TCONS_00016311_ZNF667-AS1	-41.518	-27.5993	7.36744e-68	8.25932e-63	7.36744e-68	0.001	0.00409431
chr19:57006415_rs17207481	TCONS_00016310_ZNF667-AS1	41.518	27.5993	7.36744e-68	8.25932e-63	7.36744e-68	0.001	0.00409431
chr14:20881527_rs1713434	TCONS_00009624_TEP1	27.2112	27.3055	3.66973e-67	2.83616e-62	3.66973e-67	0.001	0.00409431
chr14:20881527_rs1713434	TCONS_00009625_TEP1	-27.2112	-27.3055	3.66973e-67	2.83616e-62	3.66973e-67	0.001	0.00409431
chr11:60152584_rs950802	TCONS_00005120_MS4A7	-25.3306	-26.8468	4.59476e-66	4.48319e-61	4.59476e-66	0.001	0.00409431
chr19:55831088_rs2384688	TCONS_00017409_TMEM150B	-8.06078	-25.7983	1.63403e-63	1.47422e-58	1.63403e-63	0.001	0.00409431
chr4:169317279_rs3857035	TCONS_00025115_DDX60L	-16.0229	-25.5021	8.80509e-63	2.60949e-57	8.80509e-63	0.001	0.00409431
chr14:65375444_rs10142016	TCONS_00009347_CHURC1-FNTB	6.29949	25.3808	1.76011e-62	7.87545e-58	1.76011e-62	0.001	0.00409431
chr9:139371342_rs11999525	TCONS_00032758_SEC16A	-18.7567	-25.2054	4.80948e-62	6.45695e-57	4.80948e-62	0.001	0.00409431
chr12:9869271_rs2268146	TCONS_00007665_CLECL1	8.43267	25.1508	6.57997e-62	4.26424e-57	6.57997e-62	0.001	0.00409431
chr11:60152584_rs950802	TCONS_00005121_MS4A7	27.9194	25.036	1.27371e-61	1.19027e-56	1.27371e-61	0.001	0.00409431
chr18:5245228_rs11877479	TCONS_00014785_LINC00667	-23.2826	-24.5722	1.8696e-60	5.0022e-55	1.8696e-60	0.001	0.00409431
chr5:35874575_rs6897932	TCONS_00025357_IL7R	14.9161	24.5719	1.87195e-60	2.08647e-55	1.87195e-60	0.001	0.00409431
chr5:35874575_rs6897932	TCONS_00025356_IL7R	-14.9161	-24.5719	1.87195e-60	2.08647e-55	1.87195e-60	0.001	0.00409431
chr10:99419535_rs77962804	TCONS_00004580_AVPI1	-54.4672	-24.518	2.56277e-60	2.17717e-55	2.56277e-60	0.001	0.00409431
chr10:99419535_rs77962804	TCONS_00004581_AVPI1	54.4672	24.518	2.56277e-60	2.17717e-55	2.56277e-60	0.001	0.00409431
chr4:83865485_rs11937821	TCONS_00024903_SEC31A	1.90323	24.3676	6.16632e-60	6.80107e-55	6.16632e-60	0.001	0.00409431
chr4:83865485_rs11937821	TCONS_00024889_SEC31A	-1.90323	-24.3676	6.16632e-60	6.80107e-55	6.16632e-60	0.001	0.00409431
chr2:218928644_rs3181211	TCONS_00019635_CXCR2P1	-4.34079	-24.2451	1.2625e-59	3.42014e-53	1.2625e-59	0.001	0.00409431
chr2:202007013_rs56230518	TCONS_00018382_CFLAR	3.53178	24.1983	1.66198e-59	3.42014e-53	1.66198e-59	0.001	0.00409431
chr4:119141198_rs146465314	TCONS_00024463_SNHG8	-19.8427	-23.5955	5.84134e-58	5.27622e-53	5.84134e-58	0.001	0.00409431
chr4:119141198_rs146465314	TCONS_00024464_SNHG8	19.8427	23.5955	5.84134e-58	5.27622e-53	5.84134e-58	0.001	0.00409431
chr1:207923081_rs2761437	TCONS_00001664_CD46	-20.162	-23.5063	9.929e-58	3.84386e-53	9.929e-58	0.001	0.00409431
chr13:43469157_rs1359185	TCONS_00008850_EPSTI1	4.83044	23.4509	1.38115e-57	3.40265e-51	1.38115e-57	0.001	0.00409431
chr12:113357193_rs10774671	TCONS_00007432_OAS1	-13.3078	-23.3782	2.13114e-57	9.3845e-53	2.13114e-57	0.001	0.00409431
chr19:9528265_rs11667878	TCONS_00016515_ZNF266	21.7238	23.3773	2.14223e-57	1.47311e-52	2.14223e-57	0.001	0.00409431
chr11:60152584_rs950802	TCONS_00005123_MS4A14	27.7058	23.3485	2.54417e-57	1.91821e-52	2.54417e-57	0.001	0.00409431
chr11:60152584_rs950802	TCONS_00005128_MS4A14	-27.7058	-23.3485	2.54417e-57	1.91821e-52	2.54417e-57	0.001	0.00409431
chr3:188066953_rs6787621	TCONS_00023111_LPP	19.0575	23.1961	6.33594e-57	1.81909e-51	6.33594e-57	0.001	0.00409431
chr22:45797954_rs4605479	TCONS_00021637_FAM118A	40.0879	23.1208	9.94981e-57	2.80168e-52	9.94981e-57	0.001	0.00409431
chr22:45797954_rs4605479	TCONS_00021636_FAM118A	-40.0879	-23.1208	9.94981e-57	2.80168e-52	9.94981e-57	0.001	0.00409431
chr6:32559520_rs11751601	TCONS_00027142_HLA-DQA1	-33.4943	-23.0121	1.91216e-56	2.89709e-52	1.91216e-56	0.001	0.00409431
chr14:91636395_rs4900071	TCONS_00009496_C14orf159	31.0495	22.6171	2.07982e-55	3.80629e-51	2.07982e-55	0.001	0.00409431
chr11:500248_rs7113204	TCONS_00005791_RNH1	-7.64597	-22.439	6.13786e-55	4.28673e-50	6.13786e-55	0.001	0.00409431
chr22:39355110_rs1977068	TCONS_00021562_APOBEC3G	-26.1355	-22.4098	7.33381e-55	1.94657e-50	7.33381e-55	0.001	0.00409431
chr22:39355110_rs1977068	TCONS_00021581_APOBEC3G	26.1355	22.4098	7.33381e-55	1.94657e-50	7.33381e-55	0.001	0.00409431
chr20:56180563_rs6025653	TCONS_00020831_ZBP1	7.51898	22.209	2.49807e-54	9.45069e-50	2.49807e-54	0.001	0.00409431
chr1:79108884_rs6693207	TCONS_00000602_IFI44L	1.13994	22.0301	7.47669e-54	2.6346e-49	7.47669e-54	0.001	0.00409431
chr17:7530147_rs858521	TCONS_00013774_SAT2	12.1676	21.9834	9.96302e-54	1.92585e-48	9.96302e-54	0.001	0.00409431
chr1:85399781_rs12124212	TCONS_00002471_MCOLN2	4.02223	21.9149	1.51846e-53	5.30145e-49	1.51846e-53	0.001	0.00409431
chr19:41932084_rs284660	TCONS_00016889_ATP5SL	-16.7897	-21.8939	1.72832e-53	7.95555e-49	1.72832e-53	0.001	0.00409431
chr19:41932084_rs284660	TCONS_00016890_ATP5SL	16.7897	21.8939	1.72832e-53	7.95555e-49	1.72832e-53	0.001	0.00409431
chr10:45479872_rs914703	TCONS_00003696_RASSF4	-7.79472	-21.753	4.1202e-53	1.88562e-48	4.1202e-53	0.001	0.00409431
chr10:45479872_rs914703	TCONS_00003695_RASSF4	7.79472	21.753	4.1202e-53	1.88562e-48	4.1202e-53	0.001	0.00409431
chr1:79093818_rs273259	TCONS_00000592_IFI44L	12.6047	21.7257	4.87702e-53	1.67196e-48	4.87702e-53	0.001	0.00409431
chr11:502217_rs7944548	TCONS_00005796_RNH1	-4.97657	-21.6632	7.17663e-53	4.66824e-48	7.17663e-53	0.001	0.00409431
chr1:158324425_rs1065457	TCONS_00001185_CD1E	6.23803	21.4729	2.33342e-52	7.81129e-48	2.33342e-52	0.001	0.00409431
chr16:2011126_rs758335	TCONS_00012016_TCRBV20S1	-7.73201	-21.1876	1.37849e-51	4.87645e-46	1.37849e-51	0.001	0.00409431
chr1:85399781_rs12124212	TCONS_00002467_MCOLN2	4.96782	21.1277	2.00488e-51	6.40983e-47	2.00488e-51	0.001	0.00409431
chr11:58376276_rs7927966	TCONS_00005083_ZFP91	16.5015	21.1092	2.24998e-51	1.42174e-46	2.24998e-51	0.001	0.00409431
chr11:58376276_rs7927966	TCONS_00005085_ZFP91	-16.5015	-21.1092	2.24998e-51	1.42174e-46	2.24998e-51	0.001	0.00409431
chr4:122729251_rs11098645	TCONS_00024474_EXOSC9	-11.7186	-21.0188	3.96427e-51	1.02555e-46	3.96427e-51	0.001	0.00409431
chr4:122729251_rs11098645	TCONS_00024475_EXOSC9	11.7186	21.0188	3.96427e-51	1.02555e-46	3.96427e-51	0.001	0.00409431
chr19:35506729_rs2290647	TCONS_00015648_GRAMD1A	23.2981	20.3972	1.99264e-49	7.34379e-45	1.99264e-49	0.001	0.00409431
chr1:151746524_rs1623480	TCONS_00002755_TDRKH	3.81104	20.1517	9.48653e-49	2.78281e-44	9.48653e-49	0.001	0.00409431
chr1:179863922_rs514421	TCONS_00001439_TOR1AIP1	-32.0712	-20.0873	1.43001e-48	4.18407e-44	1.43001e-48	0.001	0.00409431
chr12:109014241_rs59367899	TCONS_00008136_CORO1C	-25.3358	-20.037	1.97036e-48	2.27103e-44	1.97036e-48	0.001	0.00409431
chr10:16863161_rs780633	TCONS_00004290_RSU1	3.13063	19.9853	2.74081e-48	8.7879e-44	2.74081e-48	0.001	0.00409431
chr13:43469157_rs1359185	TCONS_00008847_EPSTI1	-4.07504	-19.9031	4.6372e-48	6.01284e-43	4.6372e-48	0.001	0.00409431
chr14:74030518_rs2336136	TCONS_00009422_ACOT2	10.7206	19.8455	6.70452e-48	1.14915e-43	6.70452e-48	0.001	0.00409431
chr14:74030518_rs2336136	TCONS_00009421_ACOT2	-10.7206	-19.8455	6.70452e-48	1.14915e-43	6.70452e-48	0.001	0.00409431
chr4:76832856_rs2135232	TCONS_00024834_NAAA	-9.35569	-19.8387	7.00419e-48	1.36229e-43	7.00419e-48	0.001	0.00409431
chr11:66227184_rs1791687	TCONS_00005346_DPP3	-15.39	-19.727	1.43298e-47	5.97965e-43	1.43298e-47	0.001	0.00409431
chr1:197704717_rs17641524	TCONS_00003126_DENND1B	0.788381	19.6855	1.87153e-47	5.2209e-43	1.87153e-47	0.001	0.00409431
chr10:43657811_rs2257767	TCONS_00003687_CSGALNACT2	7.71635	19.6809	1.92701e-47	5.76441e-43	1.92701e-47	0.001	0.00409431
chr10:43657811_rs2257767	TCONS_00003688_CSGALNACT2	-7.71635	-19.6809	1.92701e-47	5.76441e-43	1.92701e-47	0.001	0.00409431
chr4:169314327_rs4692656	TCONS_00025157_DDX60L	8.31303	19.581	3.66392e-47	7.10029e-43	3.66392e-47	0.001	0.00409431
chr14:24900209_rs1956905	TCONS_00009197_KHNYN	-6.84947	-19.468	7.58568e-47	1.26449e-42	7.58568e-47	0.001	0.00409431
chr14:24900209_rs1956905	TCONS_00009199_KHNYN	6.84947	19.468	7.58568e-47	1.26449e-42	7.58568e-47	0.001	0.00409431
chr5:96252589_rs2910686	TCONS_00025657_ERAP2	10.2013	19.3271	1.88379e-46	1.50424e-41	1.88379e-46	0.001	0.00409431
chr17:39942919_rs4796702	TCONS_00014089_JUP	-10.6994	-19.2992	2.2571e-46	2.90864e-41	2.2571e-46	0.001	0.00409431
chr11:613742_rs60870990	TCONS_00005831_IRF7	5.91701	19.226	3.62524e-46	1.31437e-41	3.62524e-46	0.001	0.00409431
chr2:170441001_rs2276611	TCONS_00018195_PPIG	-33.8474	-19.1764	4.99947e-46	7.72511e-41	4.99947e-46	0.001	0.00409431
chr5:179264731_rs10277	TCONS_00141537_add_C5orf45	-11.4712	-19.1381	6.40729e-46	4.63235e-41	6.40729e-46	0.001	0.00409431
chr5:179264731_rs10277	TCONS_00141538_add_C5orf45	11.4712	19.1381	6.40729e-46	4.63235e-41	6.40729e-46	0.001	0.00409431
chr20:25449818_rs367666	TCONS_00020617_ABHD12	4.09974	19.0628	1.04439e-45	2.08349e-41	1.04439e-45	0.001	0.00409431
chr20:25449818_rs367666	TCONS_00020611_ABHD12	-4.09974	-19.0628	1.04439e-45	2.08349e-41	1.04439e-45	0.001	0.00409431
chr6:32626696_rs34865969	TCONS_00028023_HLA-DQB2	98.2315	19.0299	1.29337e-45	9.57666e-42	1.29337e-45	0.001	0.00409431
chr4:169314327_rs4692656	TCONS_00025161_DDX60L	7.39219	18.9782	1.80969e-45	3.44437e-41	1.80969e-45	0.001	0.00409431
chr7:134854615_rs6969894	TCONS_00029369_TMEM140	-16.3828	-18.9406	2.31104e-45	6.83239e-41	2.31104e-45	0.001	0.00409431
chr7:150026339_rs11765644	TCONS_00029433_LRRC61	11.847	18.9245	2.56707e-45	7.5303e-41	2.56707e-45	0.001	0.00409431
chr6:86387888_rs1059307	TCONS_00028312_SNHG5	14.4563	18.8234	4.96087e-45	3.59217e-41	4.96087e-45	0.001	0.00409431
chr2:218931055_rs10932740	TCONS_00018504_RUFY4	11.2308	18.6836	1.23549e-44	1.65651e-39	1.23549e-44	0.001	0.00409431
chr15:89434403_rs7166481	TCONS_00011070_HAPLN3	7.19607	18.67	1.35041e-44	1.43557e-38	1.35041e-44	0.001	0.00409431
chr15:75130093_rs12898397	TCONS_00010981_ULK3	-31.172	-18.6611	1.43099e-44	1.43557e-38	1.43099e-44	0.001	0.00409431
chr15:75130093_rs12898397	TCONS_00010982_ULK3	31.6868	18.6173	1.90598e-44	1.43557e-38	1.90598e-44	0.001	0.00409431
chr17:25962423_rs8079018	TCONS_00012910_LGALS9	11.1384	18.5107	3.83064e-44	4.36994e-39	3.83064e-44	0.001	0.00409431
chr17:25962423_rs8079018	TCONS_00012909_LGALS9	-11.1384	-18.5107	3.83064e-44	4.36994e-39	3.83064e-44	0.001	0.00409431
chr3:188058716_rs9877579	TCONS_00023113_LPP	20.1393	18.4634	5.22204e-44	8.17789e-39	5.22204e-44	0.001	0.00409431
chr19:51736383_rs33978622	TCONS_00015985_CD33	20.4822	18.4508	5.67495e-44	1.53109e-39	5.67495e-44	0.001	0.00409431
chr3:52874288_rs6445538	TCONS_00023504_TMEM110-MUSTN1	-6.40742	-18.4482	5.77006e-44	8.45934e-39	5.77006e-44	0.001	0.00409431
chr3:52874288_rs6445538	TCONS_00023563_TMEM110-MUSTN1	6.40742	18.4482	5.77006e-44	8.45934e-39	5.77006e-44	0.001	0.00409431
chr7:92891412_rs34856594	TCONS_00029948_SAMD9L	-5.10613	-18.3266	1.28268e-43	3.09943e-39	1.28268e-43	0.001	0.00409431
chr12:123180061_rs1798219	TCONS_00008283_HCAR1	21.6915	18.2094	2.77392e-43	2.77371e-39	2.77392e-43	0.001	0.00409431
chr6:46657057_rs3799277	TCONS_00028233_PLA2G7	-4.94687	-18.1528	4.0261e-43	2.65305e-39	4.0261e-43	0.001	0.00409431
chr14:100820536_rs3783345	TCONS_00010025_WARS	-3.17942	-18.1491	4.12649e-43	6.77237e-39	4.12649e-43	0.001	0.00409431
chr3:119242930_rs11916272	TCONS_00022719_TIMMDC1	16.9081	18.091	6.05142e-43	5.63481e-38	6.05142e-43	0.001	0.00409431
chr3:119242930_rs11916272	TCONS_00022716_TIMMDC1	-16.9081	-18.091	6.05142e-43	5.63481e-38	6.05142e-43	0.001	0.00409431
chr5:96252589_rs2910686	TCONS_00025647_ERAP2	-25.7086	-18.0887	6.14675e-43	2.16352e-38	6.14675e-43	0.001	0.00409431
chr2:170446646_rs12469419	TCONS_00018194_PPIG	30.4796	18.078	6.59641e-43	8.05637e-38	6.59641e-43	0.001	0.00409431
chr1:28207887_rs35119733	TCONS_00000291_THEMIS2	2.014	18.0276	9.19859e-43	2.04884e-38	9.19859e-43	0.001	0.00409431
chr1:28207887_rs35119733	TCONS_00000290_THEMIS2	-2.014	-18.0276	9.19859e-43	2.04884e-38	9.19859e-43	0.001	0.00409431
chr15:22922576_rs7171787	TCONS_00010159_CYFIP1	6.67797	18.0002	1.10264e-42	4.07269e-37	1.10264e-42	0.001	0.00409431
chr14:100840596_rs941928	TCONS_00010037_WARS	-4.03777	-17.923	1.83698e-42	2.90277e-38	1.83698e-42	0.001	0.00409431
chr8:144643169_rs1545536	TCONS_00030793_GSDMD	10.0686	17.8864	2.33961e-42	8.73956e-38	2.33961e-42	0.001	0.00409431
chr2:71036482_rs2287101	TCONS_00019092_CLEC4F	-19.0733	-17.7769	4.83133e-42	4.54185e-37	4.83133e-42	0.001	0.00409431
chr2:218928710_rs3181210	TCONS_00019629_CXCR2P1	6.18482	17.3905	6.30381e-41	5.60404e-36	6.30381e-41	0.001	0.00409431
chr20:391025_rs6139109	TCONS_00019788_RBCK1	4.35571	17.2479	1.63262e-40	7.50255e-37	1.63262e-40	0.001	0.00409431
chr2:99202747_rs3754875	TCONS_00017851_UNC50	13.5308	17.1972	2.29139e-40	1.9727e-35	2.29139e-40	0.001	0.00409431
chr2:99202747_rs3754875	TCONS_00017852_UNC50	-13.5308	-17.1972	2.29139e-40	1.9727e-35	2.29139e-40	0.001	0.00409431
chr4:169348476_rs74346802	TCONS_00025171_DDX60L	-3.31125	-17.1952	2.32208e-40	3.72737e-36	2.32208e-40	0.001	0.00409431
chr17:18199150_rs8081343	TCONS_00012868_SMCR8	13.0045	16.9447	1.24248e-39	1.05441e-34	1.24248e-39	0.001	0.00409431
chr17:18199150_rs8081343	TCONS_00012869_SMCR8	-13.0045	-16.9447	1.24248e-39	1.05441e-34	1.24248e-39	0.001	0.00409431
chr4:2815632_rs433030	TCONS_00024108_SH3BP2	-12.5537	-16.9376	1.30337e-39	2.00749e-35	1.30337e-39	0.001	0.00409431
chr12:121825447_rs10774592	TCONS_00007478_RNF34	10.1018	16.8403	2.50412e-39	2.02138e-35	2.50412e-39	0.001	0.00409431
chr12:121825447_rs10774592	TCONS_00007480_RNF34	-10.1018	-16.8403	2.50412e-39	2.02138e-35	2.50412e-39	0.001	0.00409431
chr2:175347650_rs12614738	TCONS_00019467_GPR155	-7.04508	-16.7867	3.58933e-39	1.64001e-34	3.58933e-39	0.001	0.00409431
chr15:22922576_rs7171787	TCONS_00010160_CYFIP1	-6.51494	-16.7813	3.72066e-39	1.00779e-33	3.72066e-39	0.001	0.00409431
chr20:1893121_rs1569960	TCONS_00019803_SIRPA	14.7615	16.7762	3.85088e-39	1.65728e-35	3.85088e-39	0.001	0.00409431
chr20:1893121_rs1569960	TCONS_00019809_SIRPA	-14.7615	-16.7762	3.85088e-39	1.65728e-35	3.85088e-39	0.001	0.00409431
chr9:114434070_rs7045665	TCONS_00031853_DNAJC25-GNG10	-4.53896	-16.6789	7.40665e-39	4.49837e-34	7.40665e-39	0.001	0.00409431
chr9:114434070_rs7045665	TCONS_00031854_DNAJC25-GNG10	4.53896	16.6789	7.40665e-39	4.49837e-34	7.40665e-39	0.001	0.00409431
chr19:9509490_rs76643557	TCONS_00016514_ZNF266	-13.0631	-16.6011	1.25091e-38	2.27681e-34	1.25091e-38	0.001	0.00409431
chr1:173832647_rs16846478	TCONS_00003035_GAS5	16.8755	16.5467	1.80418e-38	3.53437e-34	1.80418e-38	0.001	0.00409431
chr16:25161720_rs185731	TCONS_00011437_LCMT1	-7.7525	-16.4522	3.41272e-38	8.23134e-33	3.41272e-38	0.001	0.00409431
chr7:134855725_rs76510925	TCONS_00029374_TMEM140	13.2254	16.4128	4.45244e-38	6.3637e-34	4.45244e-38	0.001	0.00409431
chr5:52075730_rs2648726	TCONS_00025423_ITGA1	-11.7187	-16.3805	5.53584e-38	6.36928e-34	5.53584e-38	0.001	0.00409431
chr5:52075730_rs2648726	TCONS_00025424_ITGA1	11.7187	16.3805	5.53584e-38	6.36928e-34	5.53584e-38	0.001	0.00409431
chr2:223772454_rs12474230	TCONS_00018585_ACSL3	-10.8763	-16.3742	5.77583e-38	2.30434e-33	5.77583e-38	0.001	0.00409431
chr20:56181949_rs4811887	TCONS_00020828_ZBP1	-6.60068	-16.3672	6.05716e-38	2.47268e-34	6.05716e-38	0.001	0.00409431
chr6:160133633_rs76993980	TCONS_00028547_SOD2	6.44059	16.3262	7.99109e-38	3.89243e-34	7.99109e-38	0.001	0.00409431
chr6:160133633_rs76993980	TCONS_00028546_SOD2	-6.44059	-16.3262	7.99109e-38	3.89243e-34	7.99109e-38	0.001	0.00409431
chr2:191520845_rs2293765	TCONS_00018278_NAB1	9.54788	16.2879	1.03487e-37	3.00139e-33	1.03487e-37	0.001	0.00409431
chr11:504636_rs79095790	TCONS_00005797_RNH1	12.8029	16.2829	1.07017e-37	1.38141e-33	1.07017e-37	0.001	0.00409431
chr7:105883804_rs12674432	TCONS_00030059_NAMPT	3.01695	16.1792	2.15787e-37	3.02621e-33	2.15787e-37	0.001	0.00409431
chr7:105883804_rs12674432	TCONS_00030060_NAMPT	-3.01695	-16.1792	2.15787e-37	3.02621e-33	2.15787e-37	0.001	0.00409431
chr22:36601361_rs6000192	TCONS_00021865_APOL4	-28.5095	-16.0416	5.48165e-37	4.34e-33	5.48165e-37	0.001	0.00409431
chr11:77830589_rs61900233	TCONS_00006463_ALG8	-12.7707	-15.7403	4.23642e-36	4.44749e-32	4.23642e-36	0.001	0.00409431
chr11:77830589_rs61900233	TCONS_00006462_ALG8	12.7707	15.7403	4.23642e-36	4.44749e-32	4.23642e-36	0.001	0.00409431
chr14:65378449_rs10151701	TCONS_00009345_CHURC1-FNTB	-6.42715	-15.7243	4.72349e-36	6.01141e-32	4.72349e-36	0.001	0.00409431
chr10:16863161_rs780633	TCONS_00004287_RSU1	-2.53798	-15.5692	1.35637e-35	1.72923e-31	1.35637e-35	0.001	0.00409431
chr3:48478039_rs13069724	TCONS_00022432_ATRIP	-2.90369	-15.48	2.4908e-35	1.28082e-30	2.4908e-35	0.001	0.00409431
chr12:123180061_rs1798219	TCONS_00008281_HCAR1	-25.4834	-15.4645	2.76809e-35	1.9463e-31	2.76809e-35	0.001	0.00409431
chr7:134853844_rs9649052	TCONS_00030186_C7orf49	7.82162	15.4598	2.85853e-35	2.59139e-31	2.85853e-35	0.001	0.00409431
chr2:175347650_rs12614738	TCONS_00019468_GPR155	10.0732	15.4577	2.89963e-35	4.41626e-31	2.89963e-35	0.001	0.00409431
chr12:58112189_rs799265	TCONS_00007182_OS9	-4.76423	-15.3835	4.80764e-35	3.35971e-31	4.80764e-35	0.001	0.00409431
chr20:34284689_rs6060564	TCONS_00020673_CPNE1	12.2593	15.369	5.30705e-35	2.01479e-31	5.30705e-35	0.001	0.00409431
chr12:9869271_rs2268146	TCONS_00007664_CLECL1	4.96284	15.3276	7.03702e-35	4.90271e-31	7.03702e-35	0.001	0.00409431
chr15:89436085_rs884727	TCONS_00011074_HAPLN3	-8.79148	-15.2817	9.62536e-35	1.26363e-29	9.62536e-35	0.001	0.00409431
chr16:1292941_rs62012908	TCONS_00011182_TPSAB1	-14.5871	-15.1896	1.80563e-34	1.95535e-29	1.80563e-34	0.001	0.00409431
chr16:1292941_rs62012908	TCONS_00011180_TPSAB1	14.5871	15.1896	1.80563e-34	1.95535e-29	1.80563e-34	0.001	0.00409431
chr7:35734529_rs78381277	TCONS_00029680_HERPUD2	3.82615	14.9603	8.65284e-34	6.98626e-30	8.65284e-34	0.001	0.00409431
chr7:32994461_rs10252042	TCONS_00028779_AVL9	5.29212	14.9058	1.25597e-33	9.9965e-30	1.25597e-33	0.001	0.00409431
chr7:32994461_rs10252042	TCONS_00028777_AVL9	-5.29212	-14.9058	1.25597e-33	9.9965e-30	1.25597e-33	0.001	0.00409431
chr12:109014756_rs8179151	TCONS_00008133_CORO1C	26.4539	14.8975	1.32996e-33	8.87005e-30	1.32996e-33	0.001	0.00409431
chr8:144643169_rs1545536	TCONS_00030787_GSDMD	-13.8511	-14.798	2.62738e-33	4.49204e-29	2.62738e-33	0.001	0.00409431
chr1:151747733_rs1781421	TCONS_00002749_TDRKH	-5.1878	-14.6255	8.5632e-33	1.33148e-28	8.5632e-33	0.001	0.00409431
chr1:89467242_rs12140979	TCONS_00002496_GBP3	-14.1987	-14.5812	1.15977e-32	1.77148e-28	1.15977e-32	0.001	0.00409431
chr1:89467242_rs12140979	TCONS_00002502_GBP3	14.1987	14.5812	1.15977e-32	1.77148e-28	1.15977e-32	0.001	0.00409431
chr9:134452370_rs6879	TCONS_00032685_RAPGEF1	-16.4743	-14.5651	1.29551e-32	6.74415e-28	1.29551e-32	0.001	0.00409431
chr6:32585967_rs115958783	TCONS_00027996_HLA-DRB5	-4.85362	-14.3254	6.70753e-32	2.18049e-28	6.70753e-32	0.001	0.00409431
chr3:48297611_rs11130162	TCONS_00022427_ZNF589	-8.86733	-14.2853	8.8308e-32	2.83019e-27	8.8308e-32	0.001	0.00409431
chr1:158324425_rs1065457	TCONS_00001197_CD1E	-3.9523	-14.243	1.1804e-31	1.67938e-27	1.1804e-31	0.001	0.00409431
chr15:50760171_rs112743474	TCONS_00010308_USP8	13.9245	14.2363	1.236e-31	9.6573e-27	1.236e-31	0.001	0.00409431
chr15:50760171_rs112743474	TCONS_00010305_USP8	-13.9245	-14.2363	1.236e-31	9.6573e-27	1.236e-31	0.001	0.00409431
chr1:236710409_rs58158181	TCONS_00001816_LGALS8	21.5518	14.2333	1.26204e-31	1.77998e-27	1.26204e-31	0.001	0.00409431
chr1:236710409_rs58158181	TCONS_00001817_LGALS8	-21.5518	-14.2333	1.26204e-31	1.77998e-27	1.26204e-31	0.001	0.00409431
chr10:31322967_rs61845219	TCONS_00004346_ZNF438	-6.71127	-14.1532	2.1877e-31	1.70017e-27	2.1877e-31	0.001	0.00409431
chr6:32575658_rs3021304	TCONS_00027994_HLA-DRB5	9.78204	14.0327	5.00357e-31	1.58691e-27	5.00357e-31	0.001	0.00409431
chr5:94040908_rs845725	TCONS_00026247_MCTP1	-8.68457	-14.0245	5.29216e-31	3.92696e-27	5.29216e-31	0.001	0.00409431
chr3:53207516_rs3773725	TCONS_00022554_PRKCD	-5.05044	-13.9855	6.91963e-31	1.8996e-26	6.91963e-31	0.001	0.00409431
chr2:218931055_rs10932740	TCONS_00018533_RUFY4	-3.47698	-13.9319	1.00014e-30	1.21363e-26	1.00014e-30	0.001	0.00409431
chr12:102194591_rs12579766	TCONS_00008092_GNPTAB	9.30299	13.9091	1.16972e-30	6.93301e-27	1.16972e-30	0.001	0.00409431
chr12:102194591_rs12579766	TCONS_00008091_GNPTAB	-9.30299	-13.9091	1.16972e-30	6.93301e-27	1.16972e-30	0.001	0.00409431
chr2:218931055_rs10932740	TCONS_00018503_RUFY4	-4.69556	-13.8473	1.78895e-30	2.14222e-26	1.78895e-30	0.001	0.00409431
chr9:134452370_rs6879	TCONS_00032687_RAPGEF1	15.7462	13.8399	1.88125e-30	8.88659e-26	1.88125e-30	0.001	0.00409431
chr11:129993432_rs3886745	TCONS_00005754_APLP2	-8.16096	-13.7967	2.53158e-30	1.23324e-26	2.53158e-30	0.001	0.00409431
chr3:53205134_rs3773728	TCONS_00022557_PRKCD	-10.3087	-13.6737	5.8956e-30	1.47188e-25	5.8956e-30	0.001	0.00409431
chr4:76832856_rs2135232	TCONS_00024847_NAAA	8.02636	13.6198	8.54258e-30	9.36732e-26	8.54258e-30	0.001	0.00409431
chr1:85405894_rs12125761	TCONS_00002468_MCOLN2	-7.77487	-13.5963	1.00416e-29	1.245e-25	1.00416e-29	0.001	0.00409431
chr3:37168314_rs11713122	TCONS_00023279_LRRFIP2	-7.1762	-13.5071	1.85392e-29	4.37483e-25	1.85392e-29	0.001	0.00409431
chr11:611919_rs702966	TCONS_00005836_IRF7	-7.02809	-13.4984	1.96699e-29	9.39579e-26	1.96699e-29	0.001	0.00409431
chr17:78181132_rs6565646	TCONS_00014597_SGSH	7.70795	13.4645	2.48398e-29	6.21782e-25	2.48398e-29	0.001	0.00409431
chr17:78181132_rs6565646	TCONS_00014600_SGSH	-7.70795	-13.4645	2.48398e-29	6.21782e-25	2.48398e-29	0.001	0.00409431
chr7:2257612_rs6951493	TCONS_00029578_FTSJ2	-6.08532	-13.4562	2.63018e-29	1.55258e-25	2.63018e-29	0.001	0.00409431
chr1:15480493_rs7530300	TCONS_00000141_TMEM51	-6.94282	-13.3898	4.15157e-29	4.94269e-25	4.15157e-29	0.001	0.00409431
chr22:36599544_rs4820221	TCONS_00021868_APOL4	-18.9219	-13.3831	4.3448e-29	2.94336e-25	4.3448e-29	0.001	0.00409431
chr17:16346484_rs34572942	TCONS_00012858_C17orf76-AS1	-13.8445	-13.3237	6.53893e-29	1.60788e-24	6.53893e-29	0.001	0.00409431
chr22:50639778_rs3747942	TCONS_00021668_SELO	4.90276	13.3195	6.73111e-29	4.52211e-25	6.73111e-29	0.001	0.00409431
chr17:38804561_rs3752026	TCONS_00014072_SMARCE1	-3.33297	-13.24	1.16214e-28	2.80802e-24	1.16214e-28	0.001	0.00409431
chr17:38804561_rs3752026	TCONS_00014070_SMARCE1	3.33297	13.24	1.16214e-28	2.80802e-24	1.16214e-28	0.001	0.00409431
chr2:75103322_rs3771763	TCONS_00017777_HK2	5.40232	13.1749	1.81726e-28	2.05005e-24	1.81726e-28	0.001	0.00409431
chr2:75103322_rs3771763	TCONS_00017778_HK2	-5.40232	-13.1749	1.81726e-28	2.05005e-24	1.81726e-28	0.001	0.00409431
chr15:75666546_rs10220738	TCONS_00010995_SIN3A	5.33135	13.1655	1.93918e-28	9.26918e-24	1.93918e-28	0.001	0.00409431
chr15:75666546_rs10220738	TCONS_00011000_SIN3A	-5.33135	-13.1655	1.93918e-28	9.26918e-24	1.93918e-28	0.001	0.00409431
chr11:35246865_rs2421825	TCONS_00004979_CD44	5.15347	13.0998	3.04493e-28	1.37808e-24	3.04493e-28	0.001	0.00409431
chr3:41281388_rs2953	TCONS_00022354_CTNNB1	3.23375	13.0535	4.18592e-28	7.76705e-24	4.18592e-28	0.001	0.00409431
chr3:41281388_rs2953	TCONS_00022357_CTNNB1	-3.23375	-13.0535	4.18592e-28	7.76705e-24	4.18592e-28	0.001	0.00409431
chr11:66277969_rs55853079	TCONS_00006355_MRPL11	8.53016	13.0297	4.92829e-28	2.20787e-24	4.92829e-28	0.001	0.00409431
chr11:66277969_rs55853079	TCONS_00006354_MRPL11	-8.53016	-13.0297	4.92829e-28	2.20787e-24	4.92829e-28	0.001	0.00409431
chr17:36000607_rs7207654	TCONS_00014042_SYNRG	22.0026	13.0129	5.53063e-28	1.22179e-23	5.53063e-28	0.001	0.00409431
chr6:31480578_rs142982592	TCONS_00148349_add_ATP6V1G2-DDX39B	-19.0217	-12.9466	8.71938e-28	2.33542e-24	8.71938e-28	0.001	0.00409431
chr6:31480578_rs142982592	TCONS_00148348_add_ATP6V1G2-DDX39B	19.0217	12.9466	8.71938e-28	2.33542e-24	8.71938e-28	0.001	0.00409431
chr12:104345123_rs15805	TCONS_00042125_add_C12orf73	10.2438	12.8467	1.73187e-27	9.06787e-24	1.73187e-27	0.001	0.00409431
chr1:46020654_rs2991974	TCONS_00000483_AKR1A1	3.63492	12.8163	2.13359e-27	2.40436e-23	2.13359e-27	0.001	0.00409431
chr17:75192898_rs3785447	TCONS_00013480_SEC14L1	23.4955	12.7998	2.38897e-27	4.64367e-23	2.38897e-27	0.001	0.00409431
chr20:56181949_rs4811887	TCONS_00020833_ZBP1	-8.92279	-12.7861	2.62494e-27	6.83778e-24	2.62494e-27	0.001	0.00409431
chr8:145625283_rs2291135	TCONS_00031422_CPSF1	-6.94072	-12.7708	2.91616e-27	3.14636e-23	2.91616e-27	0.001	0.00409431
chr8:145625283_rs2291135	TCONS_00031423_CPSF1	6.94072	12.7708	2.91616e-27	3.14636e-23	2.91616e-27	0.001	0.00409431
chr10:82210214_rs10887899	TCONS_00003940_TSPAN14	-7.21378	-12.7605	3.12951e-27	2.09989e-23	3.12951e-27	0.001	0.00409431
chr17:4690038_rs8078118	TCONS_00013713_VMO1	26.0978	12.7405	3.58876e-27	6.6953e-23	3.58876e-27	0.001	0.00409431
chr17:4690038_rs8078118	TCONS_00013714_VMO1	-26.0978	-12.7405	3.58876e-27	6.6953e-23	3.58876e-27	0.001	0.00409431
chr11:35246865_rs2421825	TCONS_00004980_CD44	-3.96074	-12.7005	4.72419e-27	2.01313e-23	4.72419e-27	0.001	0.00409431
chr17:46141276_rs58203448	TCONS_00013254_SNX11	8.09789	12.6869	5.18478e-27	9.3471e-23	5.18478e-27	0.001	0.00409431
chr17:16346484_rs34572942	TCONS_00012856_C17orf76-AS1	12.5124	12.6284	7.74188e-27	1.3435e-22	7.74188e-27	0.001	0.00409431
chr6:31052632_rs115917409	TCONS_00027001_HLA-L	-30.3502	-12.5645	1.20044e-26	3.05481e-23	1.20044e-26	0.001	0.00409431
chr2:223777527_rs11674416	TCONS_00018584_ACSL3	7.19803	12.4832	2.09528e-26	2.1942e-22	2.09528e-26	0.001	0.00409431
chr7:6617247_rs11559147	TCONS_00028683_ZDHHC4	12.944	12.4829	2.09983e-26	1.10029e-22	2.09983e-26	0.001	0.00409431
chr9:79317135_rs10781369	TCONS_00175027_add_PRUNE2	8.65229	12.4417	2.78375e-26	1.10092e-21	2.78375e-26	0.001	0.00409431
chr9:130194487_rs6478773	TCONS_00031935_ZNF79	-15.8387	-12.3664	4.66188e-26	1.77488e-21	4.66188e-26	0.001	0.00409431
chr9:130194487_rs6478773	TCONS_00031934_ZNF79	15.8387	12.3664	4.66188e-26	1.77488e-21	4.66188e-26	0.001	0.00409431
chr9:32436014_rs7022554	TCONS_00032204_DDX58	-3.25583	-12.346	5.36216e-26	1.80567e-21	5.36216e-26	0.001	0.00409431
chr11:34893286_rs56061305	TCONS_00006052_APIP	8.35355	12.3142	6.6672e-26	2.67126e-22	6.6672e-26	0.001	0.00409431
chr11:34893286_rs56061305	TCONS_00006051_APIP	-8.35355	-12.3142	6.6672e-26	2.67126e-22	6.6672e-26	0.001	0.00409431
chr17:78076005_rs8077055	TCONS_00013526_GAA	10.7126	12.2749	8.71938e-26	1.13414e-21	8.71938e-26	0.001	0.00409431
chr17:78076005_rs8077055	TCONS_00013525_GAA	-10.7126	-12.2749	8.71938e-26	1.13414e-21	8.71938e-26	0.001	0.00409431
chr1:232657733_rs34331262	TCONS_00003294_SIPA1L2	22.5377	12.2728	8.84818e-26	8.87985e-22	8.84818e-26	0.001	0.00409431
chr18:67601636_rs1823778	TCONS_00015076_CD226	11.3375	12.2683	9.12694e-26	2.36961e-21	9.12694e-26	0.001	0.00409431
chr14:74030518_rs2336136	TCONS_00009903_HEATR4	-18.1361	-12.2614	9.56505e-26	6.29383e-22	9.56505e-26	0.001	0.00409431
chr3:196014366_rs6809764	TCONS_00024027_PCYT1A	4.34266	12.2307	1.17981e-25	1.55738e-21	1.17981e-25	0.001	0.00409431
chr3:196014366_rs6809764	TCONS_00024026_PCYT1A	-4.34266	-12.2307	1.17981e-25	1.55738e-21	1.17981e-25	0.001	0.00409431
chr10:46136306_rs4949013	TCONS_00003710_FAM21C	23.1492	12.2109	1.35107e-25	8.6021e-22	1.35107e-25	0.001	0.00409431
chr12:10275769_rs7137840	TCONS_00007679_CLEC7A	-6.39911	-12.2057	1.40047e-25	6.71823e-22	1.40047e-25	0.001	0.00409431
chr22:50853811_rs66519115	TCONS_00022020_PLXNB2	15.3052	12.174	1.73937e-25	1.09155e-21	1.73937e-25	0.001	0.00409431
chr8:130869764_rs2663618	TCONS_00031292_FAM49B	-4.38793	-12.1662	1.83451e-25	1.73876e-21	1.83451e-25	0.001	0.00409431
chr6:31472821_rs4713470	TCONS_00027033_MICB	6.70364	12.159	1.92623e-25	4.65525e-22	1.92623e-25	0.001	0.00409431
chr11:60050125_rs10792260	TCONS_00005113_MS4A4A	4.8402	12.1153	2.59774e-25	9.76526e-22	2.59774e-25	0.001	0.00409431
chr11:60050125_rs10792260	TCONS_00005116_MS4A4A	-4.8402	-12.1153	2.59774e-25	9.76526e-22	2.59774e-25	0.001	0.00409431
chr19:54800500_rs367070	TCONS_00017371_LILRA6	8.5648	12.0969	2.94604e-25	2.0804e-21	2.94604e-25	0.001	0.00409431
chr11:838634_rs8672	TCONS_00004796_CD151	4.45675	12.0749	3.42288e-25	1.27158e-21	3.42288e-25	0.001	0.00409431
chr11:838634_rs8672	TCONS_00004797_CD151	-4.45675	-12.0749	3.42288e-25	1.27158e-21	3.42288e-25	0.001	0.00409431
chr12:48293716_rs11168293	TCONS_00007775_VDR	7.44938	12.0636	3.69771e-25	1.75666e-21	3.69771e-25	0.001	0.00409431
chr12:48293716_rs11168293	TCONS_00007776_VDR	-7.44938	-12.0636	3.69771e-25	1.75666e-21	3.69771e-25	0.001	0.00409431
chr2:97000396_rs772173	TCONS_00017830_ITPRIPL1	11.3549	12.0502	4.05258e-25	4.02733e-21	4.05258e-25	0.001	0.00409431
chr10:127738918_rs1710278	TCONS_00004725_ADAM12	-15.245	-12.0288	4.68806e-25	2.95323e-21	4.68806e-25	0.001	0.00409431
chr17:75192898_rs3785447	TCONS_00013493_SEC14L1	-22.2263	-11.9865	6.25941e-25	6.79531e-21	6.25941e-25	0.001	0.00409431
chr19:14879034_rs9305048	TCONS_00016657_EMR2	-17.8115	-11.977	6.68065e-25	4.67087e-21	6.68065e-25	0.001	0.00409431
chr12:10275072_rs59913193	TCONS_00007677_CLEC7A	6.68143	11.9721	6.90354e-25	3.24154e-21	6.90354e-25	0.001	0.00409431
chr3:16354679_rs2657598	TCONS_00023222_DPH3	6.40867	11.9248	9.53361e-25	1.11721e-20	9.53361e-25	0.001	0.00409431
chr3:16354679_rs2657598	TCONS_00023221_DPH3	-6.40867	-11.9248	9.53361e-25	1.11721e-20	9.53361e-25	0.001	0.00409431
chr16:11444716_rs2032932	TCONS_00011344_RMI2	-5.59748	-11.9015	1.11774e-24	4.45944e-20	1.11774e-24	0.001	0.00409431
chr20:56180878_rs6025656	TCONS_00020834_ZBP1	3.71939	11.8968	1.15402e-24	2.73664e-21	1.15402e-24	0.001	0.00409431
chr19:3543397_rs12608919	TCONS_00016404_MFSD12	3.61774	11.8406	1.69334e-24	1.17302e-20	1.69334e-24	0.001	0.00409431
chr6:33055355_rs115561363	TCONS_00028070_HLA-DPA1	34.3337	11.7767	2.61654e-24	5.959e-21	2.61654e-24	0.001	0.00409431
chr6:33055355_rs115561363	TCONS_00028074_HLA-DPA1	-34.3337	-11.7767	2.61654e-24	5.959e-21	2.61654e-24	0.001	0.00409431
chr6:32626702_rs35779483	TCONS_00028019_HLA-DQB2	-48.9354	-11.7751	2.64436e-24	6.01872e-21	2.64436e-24	0.001	0.00409431
chr19:9528265_rs11667878	TCONS_00016512_ZNF266	-9.32216	-11.7183	3.89326e-24	2.6626e-20	3.89326e-24	0.001	0.00409431
chr6:3739193_rs4959871	TCONS_00027750_PXDC1	4.29819	11.7101	4.11779e-24	9.2661e-21	4.11779e-24	0.001	0.00409431
chr6:3739193_rs4959871	TCONS_00027749_PXDC1	-4.29819	-11.7101	4.11779e-24	9.2661e-21	4.11779e-24	0.001	0.00409431
chr10:46136306_rs4949013	TCONS_00003708_FAM21C	-15.6073	-11.6734	5.2841e-24	3.2373e-20	5.2841e-24	0.001	0.00409431
chr12:1190134_rs1362135	TCONS_00006729_ERC1	12.426	11.61	8.13206e-24	3.67278e-20	8.13206e-24	0.001	0.00409431
chr7:76111296_rs1627895	TCONS_00029069_DTX2	-13.6753	-11.5453	1.26161e-23	6.09269e-20	1.26161e-23	0.001	0.00409431
chr7:76111296_rs1627895	TCONS_00029068_DTX2	13.6753	11.5453	1.26161e-23	6.09269e-20	1.26161e-23	0.001	0.00409431
chr6:29689127_rs3757324	TCONS_00026908_HLA-F	-7.89627	-11.5309	1.39146e-23	3.05108e-20	1.39146e-23	0.001	0.00409431
chr19:48611620_rs434371	TCONS_00017030_PLA2G4C	13.9149	11.4974	1.74617e-23	1.13501e-19	1.74617e-23	0.001	0.00409431
chr10:100192818_rs61873917	TCONS_00004605_HPS1	2.66005	11.4479	2.44446e-23	1.45111e-19	2.44446e-23	0.001	0.00409431
chr20:62211185_rs6090461	TCONS_00020862_HELZ2	-9.2743	-11.4475	2.45017e-23	5.63375e-20	2.45017e-23	0.001	0.00409431
chr7:64165026_rs2862794	TCONS_00028930_ZNF107	11.0258	11.3903	3.61079e-23	1.66705e-19	3.61079e-23	0.001	0.00409431
chr6:31193211_rs115067197	TCONS_00027879_HLA-C	0.90371	11.3651	4.2834e-23	9.06304e-20	4.2834e-23	0.001	0.00409431
chr6:31193211_rs115067197	TCONS_00027878_HLA-C	-0.90371	-11.3651	4.2834e-23	9.06304e-20	4.2834e-23	0.001	0.00409431
chr20:34537160_rs3829829	TCONS_00020693_SCAND1	11.2872	11.3642	4.30936e-23	9.80471e-20	4.30936e-23	0.001	0.00409431
chr20:34537160_rs3829829	TCONS_00020694_SCAND1	-11.2872	-11.3642	4.30936e-23	9.80471e-20	4.30936e-23	0.001	0.00409431
chr22:50639636_rs6010201	TCONS_00021669_SELO	-5.2858	-11.3614	4.39158e-23	2.43923e-19	4.39158e-23	0.001	0.00409431
chr2:10548826_rs3771130	TCONS_00017472_HPCAL1	4.38157	11.342	5.00748e-23	4.74014e-19	5.00748e-23	0.001	0.00409431
chr3:71829242_rs7644362	TCONS_00023636_EIF4E3	-6.76604	-11.3399	5.08145e-23	3.96534e-19	5.08145e-23	0.001	0.00409431
chr4:78064728_rs80050370	TCONS_00024306_CCNG2	4.27175	11.3238	5.66601e-23	3.28567e-19	5.66601e-23	0.001	0.00409431
chr4:78064728_rs80050370	TCONS_00024310_CCNG2	-4.27175	-11.3238	5.66601e-23	3.28567e-19	5.66601e-23	0.001	0.00409431
chr22:24266954_rs5751776	TCONS_00021335_GSTT2	20.638	11.3217	5.74484e-23	3.15837e-19	5.74484e-23	0.001	0.00409431
chr22:24266954_rs5751776	TCONS_00021740_GSTT2	-20.638	-11.3217	5.74484e-23	3.15837e-19	5.74484e-23	0.001	0.00409431
chr4:185655171_rs902174	TCONS_00025229_MLF1IP	33.5033	11.3014	6.59339e-23	3.73407e-19	6.59339e-23	0.001	0.00409431
chr4:185655171_rs902174	TCONS_00025230_MLF1IP	-33.5033	-11.3014	6.59339e-23	3.73407e-19	6.59339e-23	0.001	0.00409431
chr1:112033519_rs2252197	TCONS_00002605_ADORA3	5.19088	11.2754	7.85805e-23	6.29404e-19	7.85805e-23	0.001	0.00409431
chr22:41593636_rs5758257	TCONS_00021599_L3MBTL2	-4.19491	-11.2341	1.03889e-22	5.5697e-19	1.03889e-22	0.001	0.00409431
chr22:36597652_rs132728	TCONS_00021864_APOL4	-25.6483	-11.1956	1.34831e-22	7.15751e-19	1.34831e-22	0.001	0.00409431
chr15:78598931_rs12593776	TCONS_00011027_WDR61	-13.7174	-11.1905	1.39487e-22	2.20517e-18	1.39487e-22	0.001	0.00409431
chr15:78598931_rs12593776	TCONS_00011029_WDR61	13.7174	11.1905	1.39487e-22	2.20517e-18	1.39487e-22	0.001	0.00409431
chr15:45914973_rs625047	TCONS_00010289_SQRDL	4.74933	11.1819	1.47839e-22	2.3039e-18	1.47839e-22	0.001	0.00409431
chr15:45914973_rs625047	TCONS_00010287_SQRDL	-4.74933	-11.1819	1.47839e-22	2.3039e-18	1.47839e-22	0.001	0.00409431
chr7:30612447_rs38486	TCONS_00158245_add_LOC401320	7.13914	11.1471	1.87077e-22	8.36125e-19	1.87077e-22	0.001	0.00409431
chr7:43804695_rs1181574	TCONS_00029724_COA1	-11.7832	-11.1128	2.3574e-22	1.02233e-18	2.3574e-22	0.001	0.00409431
chr7:102364101_rs142413565	TCONS_00030026_RASA4	9.67014	10.9561	6.77253e-22	2.85233e-18	6.77253e-22	0.001	0.00409431
chr2:113876539_rs4251980	TCONS_00017981_IL1RN	3.0907	10.9393	7.58535e-22	6.98633e-18	7.58535e-22	0.001	0.00409431
chr2:113876539_rs4251980	TCONS_00017986_IL1RN	-3.0907	-10.9393	7.58535e-22	6.98633e-18	7.58535e-22	0.001	0.00409431
chr3:160864123_rs73023235	TCONS_00022968_NMD3	-7.78246	-10.8798	1.1315e-21	7.97204e-18	1.1315e-21	0.001	0.00409431
chr3:160864123_rs73023235	TCONS_00022971_NMD3	7.78246	10.8798	1.1315e-21	7.97204e-18	1.1315e-21	0.001	0.00409431
chr22:29734696_rs174766	TCONS_00021792_AP1B1	4.84039	10.864	1.25799e-21	5.7053e-18	1.25799e-21	0.001	0.00409431
chr22:29734696_rs174766	TCONS_00021790_AP1B1	-4.84039	-10.864	1.25799e-21	5.7053e-18	1.25799e-21	0.001	0.00409431
chr3:53257111_rs77140015	TCONS_00023567_TKT	-1.81285	-10.8523	1.36066e-21	9.51849e-18	1.36066e-21	0.001	0.00409431
chr3:53257111_rs77140015	TCONS_00023568_TKT	1.81285	10.8523	1.36066e-21	9.51849e-18	1.36066e-21	0.001	0.00409431
chr14:94578162_rs2239644	TCONS_00009518_IFI27	-4.58043	-10.8518	1.36504e-21	6.38118e-18	1.36504e-21	0.001	0.00409431
chr19:54779455_rs444004	TCONS_00017364_LILRA6	-22.7222	-10.8388	1.48949e-21	8.88297e-18	1.48949e-21	0.001	0.00409431
chr12:123199676_rs28675952	TCONS_00008282_HCAR1	-10.6659	-10.8244	1.64134e-21	6.75158e-18	1.64134e-21	0.001	0.00409431
chr11:71169648_rs2276361	TCONS_00005470_NADSYN1	4.46323	10.8164	1.73176e-21	4.61818e-18	1.73176e-21	0.001	0.00409431
chr11:71169648_rs2276361	TCONS_00005471_NADSYN1	-4.46323	-10.8164	1.73176e-21	4.61818e-18	1.73176e-21	0.001	0.00409431
chr6:26343057_rs9379850	TCONS_00026877_BTN3A2	-19.2883	-10.7734	2.31088e-21	3.8128e-18	2.31088e-21	0.001	0.00409431
chr11:66216815_rs1700184	TCONS_00005348_DPP3	14.993	10.7471	2.75569e-21	7.2468e-18	2.75569e-21	0.001	0.00409431
chr2:85762209_rs1446669	TCONS_00017800_VAMP5	-2.95292	-10.7122	3.48133e-21	2.97522e-17	3.48133e-21	0.001	0.00409431
chr6:139349921_rs2504376	TCONS_00027570_ABRACL	-4.68091	-10.7048	3.65752e-21	5.81959e-18	3.65752e-21	0.001	0.00409431
chr6:139349921_rs2504376	TCONS_00027568_ABRACL	4.68091	10.7048	3.65752e-21	5.81959e-18	3.65752e-21	0.001	0.00409431
chr20:43543582_rs6130713	TCONS_00020062_YWHAB	-1.7991	-10.7047	3.66104e-21	6.85745e-18	3.66104e-21	0.001	0.00409431
chr20:43543582_rs6130713	TCONS_00020063_YWHAB	1.7991	10.7047	3.66104e-21	6.85745e-18	3.66104e-21	0.001	0.00409431
chr2:175347650_rs12614738	TCONS_00019469_GPR155	-4.12415	-10.6915	3.99977e-21	3.39347e-17	3.99977e-21	0.001	0.00409431
chr19:3534655_rs740685	TCONS_00016412_MFSD12	5.48114	10.6818	4.26787e-21	2.47587e-17	4.26787e-21	0.001	0.00409431
chr6:31555392_rs2256974	TCONS_00027058_LST1	4.84087	10.6766	4.41779e-21	6.97339e-18	4.41779e-21	0.001	0.00409431
chr6:3003970_rs138616686	TCONS_00026776_NQO2	-6.78435	-10.6322	5.9431e-21	9.29742e-18	5.9431e-21	0.001	0.00409431
chr10:29843833_rs1547169	TCONS_00004331_SVIL	10.5141	10.62	6.44904e-21	3.46356e-17	6.44904e-21	0.001	0.00409431
chr9:88714489_rs191559811	TCONS_00032357_GOLM1	-20.8567	-10.5993	7.40465e-21	1.21077e-16	7.40465e-21	0.001	0.00409431
chr9:88714489_rs191559811	TCONS_00032360_GOLM1	20.8567	10.5993	7.40465e-21	1.21077e-16	7.40465e-21	0.001	0.00409431
chr7:38233203_rs10282163	TCONS_00028815_STARD3NL	6.13353	10.559	9.69546e-21	3.55574e-17	9.69546e-21	0.001	0.00409431
chr1:89680554_rs521704	TCONS_00002526_GBP4	1.49327	10.5356	1.13291e-20	7.65249e-17	1.13291e-20	0.001	0.00409431
chr1:225974531_rs4653433	TCONS_00001732_SRP9	-2.24432	-10.4955	1.47989e-20	9.86743e-17	1.47989e-20	0.001	0.00409431
chr1:225974531_rs4653433	TCONS_00001733_SRP9	2.24432	10.4955	1.47989e-20	9.86743e-17	1.47989e-20	0.001	0.00409431
chr14:74408223_rs740507	TCONS_00009427_ZNF410	7.72049	10.4884	1.55141e-20	6.7086e-17	1.55141e-20	0.001	0.00409431
chr14:74408223_rs740507	TCONS_00009426_ZNF410	-7.72049	-10.4884	1.55141e-20	6.7086e-17	1.55141e-20	0.001	0.00409431
chr3:71829242_rs7644362	TCONS_00023643_EIF4E3	6.22354	10.4447	2.07573e-20	1.26463e-16	2.07573e-20	0.001	0.00409431
chr20:392335_rs6139114	TCONS_00019790_RBCK1	-12.5848	-10.4335	2.23689e-20	3.9361e-17	2.23689e-20	0.001	0.00409431
chr13:114529839_rs9577871	TCONS_00045922_add_GAS6-AS1	-6.02957	-10.4107	2.6027e-20	1.65688e-16	2.6027e-20	0.001	0.00409431
chr22:29703409_rs9613859	TCONS_00021399_GAS2L1	-6.30754	-10.4103	2.60949e-20	1.02798e-16	2.60949e-20	0.001	0.00409431
chr13:113534382_rs1278766	TCONS_00008717_ATP11A	-9.29238	-10.4041	2.71903e-20	1.71323e-16	2.71903e-20	0.001	0.00409431
chr9:32436014_rs7022554	TCONS_00031568_ACO1	4.66771	10.4026	2.74755e-20	4.33967e-16	2.74755e-20	0.001	0.00409431
chr7:87920830_rs74598252	TCONS_00029906_STEAP4	70.1952	10.3798	3.19677e-20	1.08347e-16	3.19677e-20	0.001	0.00409431
chr6:86387888_rs1059307	TCONS_00028313_SNHG5	-11.4749	-10.3626	3.58405e-20	5.17454e-17	3.58405e-20	0.001	0.00409431
chr5:131590257_rs7727038	TCONS_00026326_P4HA2	-9.91829	-10.3377	4.22774e-20	1.93653e-16	4.22774e-20	0.001	0.00409431
chr5:131598705_rs10463892	TCONS_00026327_P4HA2	9.62585	10.3138	4.95395e-20	2.26336e-16	4.95395e-20	0.001	0.00409431
chr1:175152251_rs12143530	TCONS_00003047_KIAA0040	-4.71773	-10.3134	4.96816e-20	3.01419e-16	4.96816e-20	0.001	0.00409431
chr1:175152251_rs12143530	TCONS_00003045_KIAA0040	4.71773	10.3134	4.96816e-20	3.01419e-16	4.96816e-20	0.001	0.00409431
chr5:467977_rs190811224	TCONS_00025294_EXOC3	-27.3819	-10.2951	5.60676e-20	2.55507e-16	5.60676e-20	0.001	0.00409431
chr5:467977_rs190811224	TCONS_00025298_EXOC3	27.3819	10.2951	5.60676e-20	2.55507e-16	5.60676e-20	0.001	0.00409431
chr12:109014756_rs8179151	TCONS_00008119_SELPLG	-32.8149	-10.2263	8.85018e-20	3.32401e-16	8.85018e-20	0.001	0.00409431
chr17:16355494_rs118184588	TCONS_00012853_TRPV2	-5.54367	-10.1792	1.20848e-19	5.65159e-16	1.20848e-19	0.001	0.00409431
chr18:61622086_rs8090046	TCONS_00080276_add_HMSD	-19.5281	-10.1678	1.30277e-19	2.36183e-15	1.30277e-19	0.001	0.00409431
chr10:50027334_rs17699445	TCONS_00003735_WDFY4	-6.23475	-10.1588	1.38225e-19	7.24912e-16	1.38225e-19	0.001	0.00409431
chr17:27897131_rs62070807	TCONS_00012934_TP53I13	5.08334	10.1479	1.48601e-19	6.86641e-16	1.48601e-19	0.001	0.00409431
chr10:76970613_rs11543	TCONS_00003878_VDAC2	-2.13423	-10.1446	1.51833e-19	7.91623e-16	1.51833e-19	0.001	0.00409431
chr10:76970613_rs11543	TCONS_00003881_VDAC2	2.13423	10.1446	1.51833e-19	7.91623e-16	1.51833e-19	0.001	0.00409431
chr10:129845903_rs7912703	TCONS_00004152_PTPRE	-4.05529	-10.1428	1.53657e-19	8.00355e-16	1.53657e-19	0.001	0.00409431
chr7:38233203_rs10282163	TCONS_00028813_STARD3NL	-8.68369	-10.1045	1.97927e-19	6.52394e-16	1.97927e-19	0.001	0.00409431
chr17:78181132_rs6565646	TCONS_00072814_add_CARD14	-5.74842	-10.0988	2.05493e-19	9.40161e-16	2.05493e-19	0.001	0.00409431
chr10:91011681_rs1332327	TCONS_00004537_LIPA	-3.34111	-10.0797	2.33116e-19	1.21188e-15	2.33116e-19	0.001	0.00409431
chr20:1889201_rs4814731	TCONS_00020272_SIRPB1	18.9822	10.0643	2.57898e-19	4.33636e-16	2.57898e-19	0.001	0.00409431
chr20:1889201_rs4814731	TCONS_00020282_SIRPB1	-18.9822	-10.0643	2.57898e-19	4.33636e-16	2.57898e-19	0.001	0.00409431
chr9:32436014_rs7022554	TCONS_00031569_ACO1	-1.81165	-10.057	2.70652e-19	3.58644e-15	2.70652e-19	0.001	0.00409431
chr8:74857165_rs4738400	TCONS_00031106_TCEB1	5.25033	10.0323	3.18518e-19	1.99984e-15	3.18518e-19	0.001	0.00409431
chr10:5000917_rs76216796	TCONS_00003483_AKR1C3	30.9738	10.0316	3.19871e-19	1.65485e-15	3.19871e-19	0.001	0.00409431
chr10:5000917_rs76216796	TCONS_00003482_AKR1C3	-30.9738	-10.0316	3.19871e-19	1.65485e-15	3.19871e-19	0.001	0.00409431
chr16:85834818_rs11557187	TCONS_00011933_COX4I1	-2.56757	-10.0095	3.70143e-19	8.53952e-15	3.70143e-19	0.001	0.00409431
chr16:85834818_rs11557187	TCONS_00011935_COX4I1	2.56757	10.0095	3.70143e-19	8.53952e-15	3.70143e-19	0.001	0.00409431
chr6:28221264_rs1679732	TCONS_00026905_ZSCAN26	-13.5049	-10.0005	3.92636e-19	5.22699e-16	3.92636e-19	0.001	0.00409431
chr6:28221264_rs1679732	TCONS_00026904_ZSCAN26	13.5049	10.0005	3.92636e-19	5.22699e-16	3.92636e-19	0.001	0.00409431
chr8:74870647_rs1559797	TCONS_00031104_TCEB1	-5.77303	-9.99673	4.02504e-19	2.51649e-15	4.02504e-19	0.001	0.00409431
chr5:100183954_rs2725116	TCONS_00026267_ST8SIA4	-1.16453	-9.96469	4.96865e-19	2.18428e-15	4.96865e-19	0.001	0.00409431
chr17:39946867_rs1811138	TCONS_00014078_JUP	-3.10387	-9.96195	5.05919e-19	2.25534e-15	5.05919e-19	0.001	0.00409431
chr17:7161628_rs2521989	TCONS_00012736_ELP5	-11.9414	-9.95885	5.16328e-19	2.30027e-15	5.16328e-19	0.001	0.00409431
chr18:2974115_rs592962	TCONS_00014936_LPIN2	-4.14661	-9.93101	6.19911e-19	1.0994e-14	6.19911e-19	0.001	0.00409431
chr11:129993432_rs3886745	TCONS_00005753_APLP2	7.68617	9.92042	6.64537e-19	1.44372e-15	6.64537e-19	0.001	0.00409431
chr4:2815256_rs422734	TCONS_00024106_SH3BP2	5.76578	9.91186	7.02944e-19	2.71656e-15	7.02944e-19	0.001	0.00409431
chr15:75130093_rs12898397	TCONS_00010983_ULK3	-13.5859	-9.89066	8.07824e-19	5.87146e-15	8.07824e-19	0.001	0.00409431
chr6:36995222_rs2274587	TCONS_00027270_FGD2	-2.73371	-9.87508	8.94726e-19	1.16233e-15	8.94726e-19	0.001	0.00409431
chr17:35932917_rs11870876	TCONS_00014041_SYNRG	-13.9307	-9.87448	8.9824e-19	3.84184e-15	8.9824e-19	0.001	0.00409431
chr7:35678214_rs3816422	TCONS_00029683_HERPUD2	-1.92154	-9.85858	9.96885e-19	3.16475e-15	9.96885e-19	0.001	0.00409431
chr6:31555392_rs2256974	TCONS_00027046_LST1	4.44144	9.85339	1.03141e-18	1.33691e-15	1.03141e-18	0.001	0.00409431
chr10:82215288_rs10887914	TCONS_00003931_TSPAN14	5.71286	9.84342	1.10099e-18	5.60925e-15	1.10099e-18	0.001	0.00409431
chr17:48752600_rs4148415	TCONS_00013292_ABCC3	-4.90506	-9.81378	1.33674e-18	5.60029e-15	1.33674e-18	0.001	0.00409431
chr17:48752600_rs4148415	TCONS_00013295_ABCC3	4.90506	9.81378	1.33674e-18	5.60029e-15	1.33674e-18	0.001	0.00409431
chr17:33584041_rs11080332	TCONS_00012993_SLFN5	-9.35857	-9.8021	1.44282e-18	5.9728e-15	1.44282e-18	0.001	0.00409431
chr17:33584041_rs11080332	TCONS_00012989_SLFN5	9.35857	9.8021	1.44282e-18	5.9728e-15	1.44282e-18	0.001	0.00409431
chr12:124482256_rs12303933	TCONS_00008330_CCDC92	-7.94922	-9.79965	1.46614e-18	5.2897e-15	1.46614e-18	0.001	0.00409431
chr12:124482256_rs12303933	TCONS_00008333_CCDC92	7.94922	9.79965	1.46614e-18	5.2897e-15	1.46614e-18	0.001	0.00409431
chr1:213020721_rs12140831	TCONS_00014206_add_FLVCR1-AS1	-23.66	-9.78945	1.56731e-18	7.5079e-15	1.56731e-18	0.001	0.00409431
chr4:37953276_rs7677622	TCONS_00024213_TBC1D1	0.729595	9.78325	1.63217e-18	6.10828e-15	1.63217e-18	0.001	0.00409431
chr7:98977515_rs10236149	TCONS_00029109_ARPC1B	-2.90802	-9.73326	2.2624e-18	7.03271e-15	2.2624e-18	0.001	0.00409431
chr13:26783096_rs4769486	TCONS_00008775_RNF6	3.58476	9.71145	2.60835e-18	1.42484e-14	2.60835e-18	0.001	0.00409431
chr7:64122831_rs138849073	TCONS_00028932_ZNF107	-8.7095	-9.70758	2.67504e-18	8.30391e-15	2.67504e-18	0.001	0.00409431
chr20:256727_rs3827147	TCONS_00020243_C20orf96	-10.9582	-9.70495	2.72123e-18	4.34217e-15	2.72123e-18	0.001	0.00409431
chr20:256727_rs3827147	TCONS_00020244_C20orf96	10.9582	9.70495	2.72123e-18	4.34217e-15	2.72123e-18	0.001	0.00409431
chr10:127738918_rs1710278	TCONS_00004723_ADAM12	9.67081	9.69325	2.93687e-18	1.46831e-14	2.93687e-18	0.001	0.00409431
chr16:30404484_rs4340343	TCONS_00012271_SEPT1	16.3874	9.68205	3.15936e-18	6.81484e-14	3.15936e-18	0.001	0.00409431
chr16:30404484_rs4340343	TCONS_00012269_SEPT1	-16.3874	-9.68205	3.15936e-18	6.81484e-14	3.15936e-18	0.001	0.00409431
chr21:34878450_rs2070390	TCONS_00021172_GART	1.75077	9.68068	3.18761e-18	1.21305e-14	3.18761e-18	0.001	0.00409431
chr7:139727135_rs2286196	TCONS_00030207_PARP12	-2.73487	-9.6538	3.79759e-18	1.16806e-14	3.79759e-18	0.001	0.00409431
chr8:11708355_rs2272766	TCONS_00030892_CTSB	-3.49937	-9.64846	3.9319e-18	1.9081e-14	3.9319e-18	0.001	0.00409431
chr8:11708355_rs2272766	TCONS_00030893_CTSB	3.49937	9.64846	3.9319e-18	1.9081e-14	3.9319e-18	0.001	0.00409431
chr17:33755366_rs772294	TCONS_00014006_SLFN12	-4.603	-9.63834	4.19946e-18	1.63504e-14	4.19946e-18	0.001	0.00409431
chr11:59939954_rs597982	TCONS_00006176_MS4A6A	9.46259	9.63463	4.30202e-18	8.9198e-15	4.30202e-18	0.001	0.00409431
chr6:32571508_rs111841857	TCONS_00028002_HLA-DRB5	-30.5675	-9.63283	4.35265e-18	5.47812e-15	4.35265e-18	0.001	0.00409431
chr1:111630353_rs6670688	TCONS_00002592_DRAM2	-10.1656	-9.62793	4.49362e-18	2.04663e-14	4.49362e-18	0.001	0.00409431
chr3:156856967_rs62274129	TCONS_00023913_CCNL1	-2.64925	-9.62005	4.73009e-18	2.29851e-14	4.73009e-18	0.001	0.00409431
chr2:71636036_rs12474072	TCONS_00017726_ZNF638	4.47283	9.61194	4.98602e-18	3.45003e-14	4.98602e-18	0.001	0.00409431
chr17:34171590_rs4251785	TCONS_00013013_TAF15	-13.4428	-9.58114	6.09093e-18	2.334e-14	6.09093e-18	0.001	0.00409431
chr19:50023455_rs150849265	TCONS_00015927_RCN3	-16.9951	-9.57681	6.2644e-18	2.89299e-14	6.2644e-18	0.001	0.00409431
chr7:6617247_rs11559147	TCONS_00028682_ZDHHC4	-10.9362	-9.57499	6.33892e-18	1.92417e-14	6.33892e-18	0.001	0.00409431
chr3:49151001_rs4364202	TCONS_00022451_WDR6	19.034	9.56154	6.91754e-18	3.34966e-14	6.91754e-18	0.001	0.00409431
chr15:59960261_rs6151568	TCONS_00010875_BNIP2	2.70888	9.50438	1.00205e-17	6.85402e-14	1.00205e-17	0.001	0.00409431
chr15:59960261_rs6151568	TCONS_00010874_BNIP2	-2.70888	-9.50438	1.00205e-17	6.85402e-14	1.00205e-17	0.001	0.00409431
chr3:75816882_rs3890036	TCONS_00120194_add_LOC401074	16.0256	9.48609	1.12803e-17	5.37162e-14	1.12803e-17	0.001	0.00409431
chr16:89791487_rs62068388	TCONS_00064125_add_ZNF276	-6.98897	-9.48544	1.13279e-17	2.23455e-13	1.13279e-17	0.001	0.00409431
chr12:53759803_rs12828860	TCONS_00006992_SP1	5.81596	9.46481	1.29461e-17	4.33186e-14	1.29461e-17	0.001	0.00409431
chr9:113801441_rs10980701	TCONS_00032470_LPAR1	17.9166	9.46479	1.29471e-17	1.43592e-13	1.29471e-17	0.001	0.00409431
chr17:39917757_rs4290524	TCONS_00014088_JUP	-2.77887	-9.43941	1.52564e-17	5.65315e-14	1.52564e-17	0.001	0.00409431
chr7:102351847_rs4729851	TCONS_00030022_RASA4	-6.65499	-9.43358	1.58424e-17	4.71101e-14	1.58424e-17	0.001	0.00409431
chr22:50851948_rs58925645	TCONS_00022017_PLXNB2	-9.26058	-9.4226	1.70072e-17	5.13409e-14	1.70072e-17	0.001	0.00409431
chr13:113533594_rs1278763	TCONS_00008713_ATP11A	9.73056	9.41744	1.75827e-17	8.6118e-14	1.75827e-17	0.001	0.00409431
chr7:80308171_rs13226433	TCONS_00029082_CD36	-2.2183	-9.37253	2.34937e-17	6.8947e-14	2.34937e-17	0.001	0.00409431
chr9:134452370_rs6879	TCONS_00032686_RAPGEF1	-7.27787	-9.36493	2.46734e-17	2.64445e-13	2.46734e-17	0.001	0.00409431
chr7:33074785_rs17170218	TCONS_00029673_NT5C3A	-1.03234	-9.34003	2.89668e-17	8.43821e-14	2.89668e-17	0.001	0.00409431
chr2:202006860_rs56160734	TCONS_00018379_CFLAR	-2.68068	-9.31777	3.34294e-17	2.0871e-13	3.34294e-17	0.001	0.00409431
chr19:17513926_rs13485	TCONS_00016694_BST2	-1.6893	-9.30443	3.64244e-17	1.62298e-13	3.64244e-17	0.001	0.00409431
chr19:17513926_rs13485	TCONS_00016695_BST2	1.6893	9.30443	3.64244e-17	1.62298e-13	3.64244e-17	0.001	0.00409431
chr7:6879445_rs4724869	TCONS_00029609_CCZ1B	-5.38667	-9.26803	4.60246e-17	1.32294e-13	4.60246e-17	0.001	0.00409431
chr7:6879445_rs4724869	TCONS_00029608_CCZ1B	5.38667	9.26803	4.60246e-17	1.32294e-13	4.60246e-17	0.001	0.00409431
chr4:89183131_rs1129043	TCONS_00024920_PPM1K	2.00337	9.23075	5.84633e-17	1.82735e-13	5.84633e-17	0.001	0.00409431
chr4:89183131_rs1129043	TCONS_00024918_PPM1K	-2.00337	-9.23075	5.84633e-17	1.82735e-13	5.84633e-17	0.001	0.00409431
chr7:30612447_rs38486	TCONS_00158251_add_LOC401320	-5.63641	-9.22849	5.93185e-17	1.68345e-13	5.93185e-17	0.001	0.00409431
chr20:16710791_rs2073055	TCONS_00019870_SNRPB2	8.47075	9.2272	5.98103e-17	8.82121e-14	5.98103e-17	0.001	0.00409431
chr20:16710791_rs2073055	TCONS_00019871_SNRPB2	-8.47075	-9.2272	5.98103e-17	8.82121e-14	5.98103e-17	0.001	0.00409431
chr3:119242930_rs11916272	TCONS_00023725_CD80	-5.0449	-9.22617	6.02071e-17	2.61411e-13	6.02071e-17	0.001	0.00409431
chr3:119242930_rs11916272	TCONS_00023721_CD80	5.0449	9.22617	6.02071e-17	2.61411e-13	6.02071e-17	0.001	0.00409431
chr8:580564_rs1669663	TCONS_00030869_ERICH1	6.23673	9.22455	6.08346e-17	2.54636e-13	6.08346e-17	0.001	0.00409431
chr8:580564_rs1669663	TCONS_00030867_ERICH1	-6.23673	-9.22455	6.08346e-17	2.54636e-13	6.08346e-17	0.001	0.00409431
chr1:112039922_rs2032006	TCONS_00002607_ADORA3	-5.3494	-9.21301	6.5508e-17	2.64771e-13	6.5508e-17	0.001	0.00409431
chr10:104162770_rs1056890	TCONS_00004642_CUEDC2	-10.8381	-9.20759	6.78196e-17	3.02116e-13	6.78196e-17	0.001	0.00409431
chr10:104162770_rs1056890	TCONS_00004643_CUEDC2	10.8381	9.20759	6.78196e-17	3.02116e-13	6.78196e-17	0.001	0.00409431
chr1:161013603_rs6427572	TCONS_00002968_F11R	1.00141	9.20737	6.79155e-17	2.74307e-13	6.79155e-17	0.001	0.00409431
chr10:48311583_rs117579758	TCONS_00018886_add_AGAP9	-6.12859	-9.19339	7.42826e-17	3.30632e-13	7.42826e-17	0.001	0.00409431
chr15:75130093_rs12898397	TCONS_00010984_ULK3	13.0711	9.14484	1.0134e-16	6.0196e-13	1.0134e-16	0.001	0.00409431
chr7:43804695_rs1181574	TCONS_00029725_COA1	10.2941	9.141	1.03859e-16	2.83608e-13	1.03859e-16	0.001	0.00409431
chr19:3540769_rs150908739	TCONS_00016410_MFSD12	-2.71013	-9.13632	1.07013e-16	4.62213e-13	1.07013e-16	0.001	0.00409431
chr12:109013956_rs73191242	TCONS_00008121_SELPLG	13.0178	9.13482	1.08041e-16	3.46977e-13	1.08041e-16	0.001	0.00409431
chr6:46657057_rs3799277	TCONS_00028235_PLA2G7	2.43091	9.09699	1.37557e-16	1.47322e-13	1.37557e-16	0.001	0.00409431
chr4:17627294_rs2315552	TCONS_00024178_MED28	-3.96144	-9.07117	1.6218e-16	4.79895e-13	1.6218e-16	0.001	0.00409431
chr4:17627294_rs2315552	TCONS_00024179_MED28	3.96144	9.07117	1.6218e-16	4.79895e-13	1.6218e-16	0.001	0.00409431
chr13:113536132_rs1290177	TCONS_00008712_ATP11A	7.93429	9.03043	2.10216e-16	9.21525e-13	2.10216e-16	0.001	0.00409431
chr12:133496960_rs7980504	TCONS_00043313_add_ZNF605	5.07312	9.01906	2.25977e-16	7.02735e-13	2.25977e-16	0.001	0.00409431
chr1:22970642_rs80083522	TCONS_00000203_C1QC	-1.41902	-9.01434	2.32865e-16	8.68988e-13	2.32865e-16	0.001	0.00409431
chr1:22970642_rs80083522	TCONS_00000202_C1QC	1.41902	9.01434	2.32865e-16	8.68988e-13	2.32865e-16	0.001	0.00409431
chr1:150499987_rs7366347	TCONS_00000907_MRPS21	3.97038	8.97801	2.93327e-16	1.08748e-12	2.93327e-16	0.001	0.00409431
chr1:150499987_rs7366347	TCONS_00000908_MRPS21	-3.97038	-8.97801	2.93327e-16	1.08748e-12	2.93327e-16	0.001	0.00409431
chr22:36602849_rs2413388	TCONS_00021858_APOL4	9.42121	8.9754	2.98236e-16	8.2261e-13	2.98236e-16	0.001	0.00409431
chr1:207684192_rs12037841	TCONS_00001661_CR1	-13.4852	-8.96791	3.12754e-16	1.15687e-12	3.12754e-16	0.001	0.00409431
chr11:33728614_rs831618	TCONS_00006006_CD59	2.58714	8.96675	3.15059e-16	5.79051e-13	3.15059e-16	0.001	0.00409431
chr17:77077452_rs73398101	TCONS_00013521_ENGASE	-20.0362	-8.95045	3.4938e-16	1.1959e-12	3.4938e-16	0.001	0.00409431
chr17:77077452_rs73398101	TCONS_00013522_ENGASE	20.0362	8.95045	3.4938e-16	1.1959e-12	3.4938e-16	0.001	0.00409431
chr19:3062857_rs11539938	TCONS_00016400_AES	-4.17915	-8.94772	3.55485e-16	1.49589e-12	3.55485e-16	0.001	0.00409431
chr19:3062857_rs11539938	TCONS_00016401_AES	4.17915	8.94772	3.55485e-16	1.49589e-12	3.55485e-16	0.001	0.00409431
chr22:50945799_rs41281543	TCONS_00022031_LMF2	-6.80619	-8.94468	3.62408e-16	9.87e-13	3.62408e-16	0.001	0.00409431
chr22:50945799_rs41281543	TCONS_00022032_LMF2	6.80619	8.94468	3.62408e-16	9.87e-13	3.62408e-16	0.001	0.00409431
chr2:238869884_rs6723077	TCONS_00018687_UBE2F-SCLY	0.38926	8.93304	3.90155e-16	2.25192e-12	3.90155e-16	0.001	0.00409431
chr2:238869884_rs6723077	TCONS_00018692_UBE2F-SCLY	-0.38926	-8.93304	3.90155e-16	2.25192e-12	3.90155e-16	0.001	0.00409431
chr5:180226918_rs78981792	TCONS_00026700_MGAT1	-0.440168	-8.93242	3.917e-16	1.36079e-12	3.917e-16	0.001	0.00409431
chr20:391025_rs6139109	TCONS_00019789_RBCK1	4.1278	8.92853	4.0146e-16	5.69386e-13	4.0146e-16	0.001	0.00409431
chr5:374510_rs1877843	TCONS_00025293_AHRR	4.47728	8.92291	4.1602e-16	1.44154e-12	4.1602e-16	0.001	0.00409431
chr3:50047404_rs9881008	TCONS_00022472_RBM6	2.74534	8.91817	4.28694e-16	1.69377e-12	4.28694e-16	0.001	0.00409431
chr15:63224506_rs6494371	TCONS_00010334_TPM1	16.3403	8.89719	4.89598e-16	2.62083e-12	4.89598e-16	0.001	0.00409431
chr15:63224506_rs6494371	TCONS_00010333_TPM1	-16.3403	-8.89719	4.89598e-16	2.62083e-12	4.89598e-16	0.001	0.00409431
chr16:4541390_rs55939215	TCONS_00012065_NMRAL1	-10.476	-8.88934	5.14509e-16	7.73411e-12	5.14509e-16	0.001	0.00409431
chr16:4541390_rs55939215	TCONS_00012066_NMRAL1	10.476	8.88934	5.14509e-16	7.73411e-12	5.14509e-16	0.001	0.00409431
chr1:222887927_rs75937448	TCONS_00001723_MIA3	-2.52688	-8.87307	5.70259e-16	2.06442e-12	5.70259e-16	0.001	0.00409431
chr19:54766055_rs34450379	TCONS_00017362_LILRA6	-18.6229	-8.8587	6.2447e-16	2.59391e-12	6.2447e-16	0.001	0.00409431
chr12:133496960_rs7980504	TCONS_00043296_add_ZNF605	-5.19052	-8.85788	6.27695e-16	1.90121e-12	6.27695e-16	0.001	0.00409431
chr6:13773988_rs6908771	TCONS_00027776_MCUR1	3.07317	8.85391	6.43629e-16	6.15262e-13	6.43629e-16	0.001	0.00409431
chr6:13773988_rs6908771	TCONS_00027777_MCUR1	-3.07317	-8.85391	6.43629e-16	6.15262e-13	6.43629e-16	0.001	0.00409431
chr4:185570675_rs114746204	TCONS_00025225_CASP3	-8.38395	-8.8486	6.65594e-16	1.86591e-12	6.65594e-16	0.001	0.00409431
chr14:104113482_rs11160756	TCONS_00009593_KLC1	0.969187	8.84207	6.93629e-16	1.67048e-12	6.93629e-16	0.001	0.00409431
chr2:58406009_rs139870579	TCONS_00017662_VRK2	1.90371	8.84076	6.99348e-16	3.98869e-12	6.99348e-16	0.001	0.00409431
chr19:53134276_rs1089760	TCONS_00017279_ZNF83	-7.93356	-8.83981	7.03554e-16	2.91704e-12	7.03554e-16	0.001	0.00409431
chr15:75901623_rs111925682	TCONS_00011003_SNUPN	-11.4926	-8.83552	7.22892e-16	3.71781e-12	7.22892e-16	0.001	0.00409431
chr3:124731485_rs10804567	TCONS_00023785_HEG1	3.28752	8.82424	7.76195e-16	2.90516e-12	7.76195e-16	0.001	0.00409431
chr3:124731485_rs10804567	TCONS_00023788_HEG1	-3.28752	-8.82424	7.76195e-16	2.90516e-12	7.76195e-16	0.001	0.00409431
chr9:92030186_rs9410321	TCONS_00032386_SEMA4D	3.6646	8.82285	7.83029e-16	6.86852e-12	7.83029e-16	0.001	0.00409431
chr9:92030186_rs9410321	TCONS_00032388_SEMA4D	-3.6646	-8.82285	7.83029e-16	6.86852e-12	7.83029e-16	0.001	0.00409431
chr11:33728614_rs831618	TCONS_00006000_CD59	-2.6176	-8.81083	8.44688e-16	1.4961e-12	8.44688e-16	0.001	0.00409431
chr7:1474342_rs9986863	TCONS_00157561_add_MICALL2	-4.91683	-8.80414	8.8104e-16	2.15528e-12	8.8104e-16	0.001	0.00409431
chr7:1474342_rs9986863	TCONS_00157574_add_MICALL2	4.91683	8.80414	8.8104e-16	2.15528e-12	8.8104e-16	0.001	0.00409431
chr12:1190134_rs1362135	TCONS_00006732_ERC1	-7.17918	-8.8033	8.85724e-16	2.66746e-12	8.85724e-16	0.001	0.00409431
chr7:99971313_rs2405442	TCONS_00029144_PILRB	-3.72653	-8.79389	9.39818e-16	2.29489e-12	9.39818e-16	0.001	0.00409431
chr10:129882119_rs1127299	TCONS_00004156_PTPRE	1.70784	8.77073	1.08737e-15	4.39094e-12	1.08737e-15	0.001	0.00409431
chr2:53931190_rs7583622	TCONS_00017650_ERLEC1	3.13255	8.74053	1.31474e-15	7.37008e-12	1.31474e-15	0.001	0.00409431
chr2:53931190_rs7583622	TCONS_00017649_ERLEC1	-3.13255	-8.74053	1.31474e-15	7.37008e-12	1.31474e-15	0.001	0.00409431
chr1:166824580_rs12117020	TCONS_00001353_POGK	-2.03646	-8.73382	1.37142e-15	4.78516e-12	1.37142e-15	0.001	0.00409431
chr20:45027364_rs6065979	TCONS_00020740_ELMO2	-9.39707	-8.69668	1.73137e-15	2.3991e-12	1.73137e-15	0.001	0.00409431
chr9:139294637_rs191129675	TCONS_00032746_CARD9	10.3179	8.68271	1.88988e-15	1.60693e-11	1.88988e-15	0.001	0.00409431
chr17:16351816_rs11871963	TCONS_00012854_TRPV2	2.04199	8.68128	1.90693e-15	6.19513e-12	1.90693e-15	0.001	0.00409431
chr1:213020721_rs12140831	TCONS_00014203_add_FLVCR1-AS1	19.8822	8.66476	2.11478e-15	7.19576e-12	2.11478e-15	0.001	0.00409431
chr10:85915186_rs7096124	TCONS_00003943_GHITM	2.26683	8.66411	2.12338e-15	8.3295e-12	2.12338e-15	0.001	0.00409431
chr10:85915186_rs7096124	TCONS_00003942_GHITM	-2.26683	-8.66411	2.12338e-15	8.3295e-12	2.12338e-15	0.001	0.00409431
chr9:139294637_rs191129675	TCONS_00032745_CARD9	-9.17305	-8.65584	2.23622e-15	1.8951e-11	2.23622e-15	0.001	0.00409431
chr5:112223594_rs712663	TCONS_00026282_REEP5	-2.4524	-8.64629	2.37401e-15	6.57406e-12	2.37401e-15	0.001	0.00409431
chr5:112223594_rs712663	TCONS_00026283_REEP5	2.4524	8.64629	2.37401e-15	6.57406e-12	2.37401e-15	0.001	0.00409431
chr11:882406_rs61869681	TCONS_00005859_CHID1	6.66222	8.64227	2.4345e-15	4.12583e-12	2.4345e-15	0.001	0.00409431
chr1:8021973_rs35675666	TCONS_00000064_PARK7	4.70319	8.63429	2.559e-15	8.6299e-12	2.559e-15	0.001	0.00409431
chr19:55966144_rs79639598	TCONS_00017415_ISOC2	11.5135	8.62347	2.7382e-15	1.07859e-11	2.7382e-15	0.001	0.00409431
chr19:55966144_rs79639598	TCONS_00017416_ISOC2	-11.5135	-8.62347	2.7382e-15	1.07859e-11	2.7382e-15	0.001	0.00409431
chr17:38119708_rs56396280	TCONS_00013092_GSDMA	27.1065	8.59312	3.30957e-15	1.05742e-11	3.30957e-15	0.001	0.00409431
chr17:38119708_rs56396280	TCONS_00013093_GSDMA	-27.1065	-8.59312	3.30957e-15	1.05742e-11	3.30957e-15	0.001	0.00409431
chr12:121660302_rs3794209	TCONS_00008234_CAMKK2	-2.24461	-8.59217	3.3292e-15	9.60919e-12	3.3292e-15	0.001	0.00409431
chr1:154245142_rs11265425	TCONS_00005070_add_HAX1	6.32916	8.58162	3.55587e-15	1.16668e-11	3.55587e-15	0.001	0.00409431
chr1:154245142_rs11265425	TCONS_00005071_add_HAX1	-6.32916	-8.58162	3.55587e-15	1.16668e-11	3.55587e-15	0.001	0.00409431
chr19:17518877_rs4808633	TCONS_00015524_AK311380	3.94477	8.57656	3.66982e-15	1.43404e-11	3.66982e-15	0.001	0.00409431
chr19:17518877_rs4808633	TCONS_00015526_AK311380	-3.94477	-8.57656	3.66982e-15	1.43404e-11	3.66982e-15	0.001	0.00409431
chr4:15836883_rs72616186	TCONS_00024170_CD38	-2.50096	-8.5549	4.20034e-15	1.05289e-11	4.20034e-15	0.001	0.00409431
chr4:15836883_rs72616186	TCONS_00024173_CD38	2.49827	8.55103	4.30264e-15	1.0755e-11	4.30264e-15	0.001	0.00409431
chr7:150026753_rs11769348	TCONS_00029435_LRRC61	-7.4364	-8.55073	4.31073e-15	9.71399e-12	4.31073e-15	0.001	0.00409431
chr13:44455005_rs41288329	TCONS_00008560_LACC1	-17.1394	-8.52828	4.95727e-15	1.84207e-11	4.95727e-15	0.001	0.00409431
chr2:101889306_rs750783	TCONS_00019261_RNF149	-1.16974	-8.52329	5.11346e-15	2.65534e-11	5.11346e-15	0.001	0.00409431
chr1:232669682_rs1326293	TCONS_00003301_SIPA1L2	-16.3927	-8.5094	5.57484e-15	1.73081e-11	5.57484e-15	0.001	0.00409431
chr16:4737383_rs844488	TCONS_00011304_MGRN1	-6.16009	-8.4968	6.02885e-15	7.14083e-11	6.02885e-15	0.001	0.00409431
chr16:4737383_rs844488	TCONS_00011305_MGRN1	6.16009	8.4968	6.02885e-15	7.14083e-11	6.02885e-15	0.001	0.00409431
chr2:175410447_rs12612197	TCONS_00019490_WIPF1	-1.68786	-8.48945	6.31035e-15	3.248e-11	6.31035e-15	0.001	0.00409431
chr4:185570553_rs113420705	TCONS_00025226_CASP3	8.34093	8.47093	7.07912e-15	1.691e-11	7.07912e-15	0.001	0.00409431
chr10:29843833_rs1547169	TCONS_00004338_SVIL	-7.69958	-8.46054	7.55057e-15	2.85321e-11	7.55057e-15	0.001	0.00409431
chr17:34171590_rs4251785	TCONS_00013007_TAF15	12.4149	8.45622	7.75544e-15	2.40287e-11	7.75544e-15	0.001	0.00409431
chr6:26410418_rs57275245	TCONS_00026886_BTN3A1	-5.3938	-8.44638	8.24325e-15	7.11874e-12	8.24325e-15	0.001	0.00409431
chr6:26410418_rs57275245	TCONS_00026881_BTN3A1	5.3938	8.44638	8.24325e-15	7.11874e-12	8.24325e-15	0.001	0.00409431
chr22:42488345_rs6002598	TCONS_00021964_NAGA	2.51808	8.43457	8.86904e-15	2.13528e-11	8.86904e-15	0.001	0.00409431
chr22:42488345_rs6002598	TCONS_00021968_NAGA	-2.51808	-8.43457	8.86904e-15	2.13528e-11	8.86904e-15	0.001	0.00409431
chr7:35736786_rs1318183	TCONS_00029681_HERPUD2	-2.64478	-8.422	9.58657e-15	2.01811e-11	9.58657e-15	0.001	0.00409431
chr2:71061051_rs41285965	TCONS_00019106_CD207	-19.5551	-8.41904	9.76369e-15	4.97847e-11	9.76369e-15	0.001	0.00409431
chr2:71061051_rs41285965	TCONS_00019107_CD207	19.5551	8.41904	9.76369e-15	4.97847e-11	9.76369e-15	0.001	0.00409431
chr1:179852074_rs1281378	TCONS_00001441_TOR1AIP1	-12.9759	-8.38939	1.17288e-14	3.50563e-11	1.17288e-14	0.001	0.00409431
chr9:34374979_rs4310287	TCONS_00031595_NUDT2	13.6456	8.38871	1.17777e-14	8.6455e-11	1.17777e-14	0.001	0.00409431
chr7:98995724_rs75944999	TCONS_00029115_ARPC1B	3.10195	8.36811	1.3376e-14	2.76558e-11	1.3376e-14	0.001	0.00409431
chr13:114503070_rs9577893	TCONS_00008738_TMEM255B	-6.02184	-8.32939	1.69823e-14	5.90102e-11	1.69823e-14	0.001	0.00409431
chr13:114503070_rs9577893	TCONS_00008739_TMEM255B	6.02184	8.32939	1.69823e-14	5.90102e-11	1.69823e-14	0.001	0.00409431
chr13:44455005_rs41288329	TCONS_00008561_LACC1	8.45955	8.32866	1.70591e-14	5.91936e-11	1.70591e-14	0.001	0.00409431
chr22:39354742_rs7292690	TCONS_00021577_APOBEC3B	-22.8392	-8.32853	1.7073e-14	3.81278e-11	1.7073e-14	0.001	0.00409431
chr5:42990378_rs2100473	TCONS_00026111_AK056817	2.70939	8.30688	1.95061e-14	4.67768e-11	1.95061e-14	0.001	0.00409431
chr3:17583586_rs9758476	TCONS_00023238_TBC1D5	-6.08662	-8.2877	2.19485e-14	6.64778e-11	2.19485e-14	0.001	0.00409431
chr18:67601636_rs1823778	TCONS_00015077_CD226	-7.4802	-8.27726	2.3402e-14	2.78046e-10	2.3402e-14	0.001	0.00409431
chr16:28823755_rs4533290	TCONS_00061774_add_AK125489	14.9678	8.25811	2.63233e-14	2.63132e-10	2.63233e-14	0.001	0.00409431
chr16:28823755_rs4533290	TCONS_00061773_add_AK125489	-14.9678	-8.25811	2.63233e-14	2.63132e-10	2.63233e-14	0.001	0.00409431
chr9:15303583_rs1215112	TCONS_00032117_TTC39B	-5.85008	-8.25022	2.76284e-14	1.8669e-10	2.76284e-14	0.001	0.00409431
chr9:15303583_rs1215112	TCONS_00032115_TTC39B	5.85008	8.25022	2.76284e-14	1.8669e-10	2.76284e-14	0.001	0.00409431
chr19:54730202_rs10853870	TCONS_00017311_LILRB3	-8.10635	-8.25006	2.76556e-14	9.89489e-11	2.76556e-14	0.001	0.00409431
chr6:33380804_rs114376990	TCONS_00028134_CUTA	-5.76243	-8.22264	3.2717e-14	2.66494e-11	3.2717e-14	0.001	0.00409431
chr20:56181949_rs4811887	TCONS_00020830_ZBP1	5.7368	8.19337	3.91347e-14	4.9906e-11	3.91347e-14	0.001	0.00409431
chr15:38618257_rs954832	TCONS_00010196_SPRED1	0.882251	8.18836	4.03532e-14	1.44963e-10	4.03532e-14	0.001	0.00409431
chr17:34951204_rs2285640	TCONS_00013059_GGNBP2	8.01197	8.18667	4.07712e-14	1.20118e-10	4.07712e-14	0.001	0.00409431
chr6:32573910_rs2647071	TCONS_00028004_HLA-DRB5	19.2826	8.17966	4.25559e-14	3.42715e-11	4.25559e-14	0.001	0.00409431
chr11:68023137_rs2512622	TCONS_00006381_C11orf24	-1.47494	-8.17224	4.45307e-14	6.77961e-11	4.45307e-14	0.001	0.00409431
chr11:68023137_rs2512622	TCONS_00006382_C11orf24	1.47494	8.17224	4.45307e-14	6.77961e-11	4.45307e-14	0.001	0.00409431
chr1:9319556_rs3765959	TCONS_00000071_H6PD	-12.7898	-8.16	4.79865e-14	1.30133e-10	4.79865e-14	0.001	0.00409431
chr20:62211185_rs6090461	TCONS_00020864_HELZ2	8.45118	8.15072	5.07821e-14	6.42638e-11	5.07821e-14	0.001	0.00409431
chr3:57256918_rs9859663	TCONS_00023586_HESX1	1.67963	8.12887	5.80188e-14	1.65884e-10	5.80188e-14	0.001	0.00409431
chr15:40581164_rs3743138	TCONS_00010722_PLCB2	4.37753	8.11039	6.49323e-14	2.29206e-10	6.49323e-14	0.001	0.00409431
chr7:99932049_rs7384878	TCONS_00029145_PILRB	-3.47245	-8.10852	6.56756e-14	1.23096e-10	6.56756e-14	0.001	0.00409431
chr12:107367224_rs1053050	TCONS_00007365_C12orf23	12.2063	8.08789	7.44565e-14	1.87561e-10	7.44565e-14	0.001	0.00409431
chr1:89698147_rs523772	TCONS_00002523_GBP4	-2.17791	-8.07483	8.06083e-14	2.13264e-10	8.06083e-14	0.001	0.00409431
chr3:134212526_rs11706117	TCONS_00023849_ANAPC13	-2.88242	-8.07473	8.06555e-14	2.26287e-10	8.06555e-14	0.001	0.00409431
chr3:134212526_rs11706117	TCONS_00023850_ANAPC13	2.88242	8.07473	8.06555e-14	2.26287e-10	8.06555e-14	0.001	0.00409431
chr16:15848553_rs62029318	TCONS_00011365_NDE1	3.18003	8.06485	8.56471e-14	7.61256e-10	8.56471e-14	0.001	0.00409431
chr19:17842620_rs12984126	TCONS_00015538_MAP1S	2.76042	8.06178	8.72596e-14	2.95695e-10	8.72596e-14	0.001	0.00409431
chr19:17842620_rs12984126	TCONS_00015539_MAP1S	-2.76042	-8.06178	8.72596e-14	2.95695e-10	8.72596e-14	0.001	0.00409431
chr9:117088064_rs10982156	TCONS_00031875_ORM1	48.551	8.0396	9.98282e-14	6.21087e-10	9.98282e-14	0.001	0.00409431
chr9:117088064_rs10982156	TCONS_00031874_ORM1	-48.551	-8.0396	9.98282e-14	6.21087e-10	9.98282e-14	0.001	0.00409431
chr7:80306350_rs1049673	TCONS_00029079_CD36	6.51481	8.01478	1.16025e-13	2.12198e-10	1.16025e-13	0.001	0.00409431
[truncated: 1,351 more rows]

## Sheet: baseline 4PCs 84 matched
SNP	gene	beta	t-stat	p-value	FDR	gene.p.min.p	emp.p	emp.q
[truncated: 717 more rows]

## Sheet: flu 4PCs 84 matched
SNP	gene	beta	t-stat	p-value	FDR	gene.p.min.p	emp.p	emp.q
[truncated: 644 more rows]

[truncated: 1 more sheets: ifn 4PCs 84 matched]
