# Supplementary material for: Genetic analysis of isoform usage in the human anti-viral response reveals influenza-specific regulation of ERAP2 transcripts under balancing selection
Source: Genome Res. 2018 Dec;28(12):1812–25. doi: 10.1101/gr.240390.118 (PMC6280757; doi:10.1101/gr.240390.118)
Supplement: Supplemental Material [file supp_gr.240390.118_SupplementalTable7.xlsx]

## Sheet: baseline 20PCs
SNP	gene	beta	t-stat	p-value	FDR	gene.p.min.p	emp.p	emp.q
chr14:65375444_rs10142016	CHURC1-FNTB	-0.472549	-40.5504	2.91569e-44	2.02533e-38	2.91569e-44	0.001	0.0022525
chr16:23694774_rs171617	DCTN5	-0.440808	-24.7773	1.52949e-32	9.69746e-27	1.52949e-32	0.001	0.0022525
chr17:48624523_rs9890200	SPATA20	1.01935	21.7225	1.51787e-29	5.0195e-23	1.51787e-29	0.001	0.0022525
chr13:60998419_rs61970123	TDRD3	-1.19986	-21.227	4.99548e-29	5.87166e-23	4.99548e-29	0.001	0.0022525
chr19:9531342_rs1978437	ZNF266	-0.338553	-20.9923	8.84994e-29	7.64383e-23	8.84994e-29	0.001	0.0022525
chr3:48939080_rs4974084	WDR6	0.752893	20.9756	9.2178e-29	3.93117e-23	9.2178e-29	0.001	0.0022525
chr1:226271290_rs10915932	H3F3A	0.574664	19.8317	1.6112e-27	1.08763e-21	1.6112e-27	0.001	0.0022525
chr6:86223316_rs12203963	SNHG5	-1.06207	-19.3727	5.25945e-27	5.51299e-21	5.25945e-27	0.001	0.0022525
chr2:61372507_rs34279970	C2orf74	-0.617101	-18.7229	2.90956e-26	3.55393e-20	2.90956e-26	0.001	0.0022525
chr11:43878459_rs35251247	HSD17B12	0.39558	18.4815	5.55289e-26	5.5455e-20	5.55289e-26	0.001	0.0022525
chr3:148866885_rs12488473	HPS3	-0.413795	-18.3908	7.09103e-26	2.67175e-21	7.09103e-26	0.001	0.0022525
chr8:17104188_rs117960717	CNOT7	-0.240366	-18.2896	9.32482e-26	4.48503e-20	9.32482e-26	0.001	0.0022525
chr5:74069311_rs6453082	NSA2	-0.371175	-17.9944	2.08506e-25	5.14724e-20	2.08506e-25	0.001	0.0022525
chr1:89475135_rs10493821	GBP3	1.338	17.5652	6.83007e-25	1.26243e-19	6.83007e-25	0.001	0.0022525
chr20:34284689_rs6060564	CPNE1	0.30038	17.5494	7.1387e-25	1.71507e-19	7.1387e-25	0.001	0.0022525
chr5:96230178_rs2548540	ERAP2	2.01228	17.4749	8.78932e-25	5.88624e-20	8.78932e-25	0.001	0.0022525
chr1:213030534_rs2279692	FLVCR1-AS1	-1.46658	-17.0716	2.74134e-24	3.41724e-19	2.74134e-24	0.001	0.0022525
chr3:53778621_rs2304577	CACNA1D	-2.02713	-16.9063	4.39246e-24	1.33975e-19	4.39246e-24	0.001	0.0022525
chr6:34748728_rs9462018	UHRF1BP1	-0.367163	-16.8702	4.87123e-24	2.85463e-19	4.87123e-24	0.001	0.0022525
chr20:37055015_rs752774	SNHG17	0.784619	16.7274	7.34239e-24	3.82568e-19	7.34239e-24	0.001	0.0022525
chr2:218936037_rs4074802	RUFY4	-0.676495	-16.3572	2.15105e-23	4.69855e-18	2.15105e-23	0.001	0.0022525
chr11:57418588_rs1647394	YPEL4	-0.602625	-16.3551	2.16401e-23	1.59083e-18	2.16401e-23	0.001	0.0022525
chr6:71910211_rs4502887	OGFRL1	1.28946	16.1967	3.44405e-23	7.56038e-19	3.44405e-23	0.001	0.0022525
chr6:33546930_rs210143	BAK1	0.309259	15.9367	7.43231e-23	1.48651e-18	7.43231e-23	0.001	0.0022525
chr2:101705989_rs2165428	TBC1D8	-1.30784	-15.711	1.45901e-22	1.49607e-17	1.45901e-22	0.001	0.0022525
chr18:33746292_rs149668757	ELP2	-0.481655	-15.6984	1.51515e-22	1.08928e-17	1.51515e-22	0.001	0.0022525
chr6:138726183_rs6919872	HEBP2	1.06219	15.6688	1.65586e-22	2.52738e-18	1.65586e-22	0.001	0.0022525
chr11:2502326_rs11022996	KCNQ1	0.768405	15.6041	2.01222e-22	1.39694e-17	2.01222e-22	0.001	0.0022525
chr4:68536679_rs1017878	UBA6	0.59301	15.5958	2.06288e-22	1.90486e-17	2.06288e-22	0.001	0.0022525
chr11:833327_rs28648546	CD151	-0.534424	-15.4906	2.83508e-22	1.79432e-17	2.83508e-22	0.001	0.0022525
chr7:87908388_rs9655959	STEAP4	-2.7171	-15.2598	5.72033e-22	3.64971e-17	5.72033e-22	0.001	0.0022525
chr12:133336384_rs75348182	ANKLE2	-0.449476	-15.0879	9.68996e-22	3.06662e-15	9.68996e-22	0.001	0.0022525
chr20:17958772_rs60396879	MGME1	0.41637	15.0307	1.15568e-21	1.97894e-17	1.15568e-21	0.001	0.0022525
chr1:158224282_rs366316	CD1A	1.24991	14.915	1.65214e-21	1.00634e-16	1.65214e-21	0.001	0.0022525
chr21:30432557_rs965951	CCT8	-0.161669	-14.9073	1.69214e-21	4.08323e-16	1.69214e-21	0.001	0.0022525
chr19:8387207_rs1057232	RPS28	2.62515	14.8692	1.90444e-21	1.23428e-16	1.90444e-21	0.001	0.0022525
chr7:106593595_rs6959577	PRKAR2B	0.465456	14.727	2.96453e-21	1.64894e-16	2.96453e-21	0.001	0.0022525
chr17:74706224_rs9915664	MXRA7	2.14419	14.5091	5.87035e-21	3.54553e-15	5.87035e-21	0.001	0.0022525
chr3:98431986_rs10935480	ST3GAL6-AS1	0.712715	14.4523	7.02094e-21	1.70344e-16	7.02094e-21	0.001	0.0022525
chr20:32432387_rs2626558	CHMP4B	0.106333	14.4444	7.19655e-21	1.13067e-16	7.19655e-21	0.001	0.0022525
chr15:22922576_rs7171787	CYFIP1	-0.305878	-14.4345	7.42608e-21	1.58328e-15	7.42608e-21	0.001	0.0022525
chr17:39992584_rs9897034	NT5C3B	1.37004	14.3485	9.74674e-21	3.58132e-15	9.74674e-21	0.001	0.0022525
chr15:50930708_rs77783097	USP8	-0.233045	-14.1763	1.68505e-20	1.58328e-15	1.68505e-20	0.001	0.0022525
chr17:38134889_rs3907022	GSDMA	2.23773	14.1718	1.70981e-20	3.97532e-15	1.70981e-20	0.001	0.0022525
chr4:185653826_rs6845294	MLF1IP	-0.452086	-14.1128	2.0641e-20	6.53981e-16	2.0641e-20	0.001	0.0022525
chr6:26356853_rs71557332	BTN3A2	0.96248	13.9253	3.76871e-20	3.33362e-16	3.76871e-20	0.001	0.0022525
chr22:36598711_rs6000186	APOL4	1.45467	13.9241	3.78324e-20	7.75625e-16	3.78324e-20	0.001	0.0022525
chr17:61873915_rs11869932	SMARCD2	-0.149885	-13.9152	3.893e-20	5.03974e-15	3.893e-20	0.001	0.0022525
chr8:145611531_rs72697606	CPSF1	0.279762	13.9061	4.00887e-20	8.5376e-15	4.00887e-20	0.001	0.0022525
chr5:96133920_rs26490	ERAP1	0.570472	13.6501	9.19029e-20	1.10342e-15	9.19029e-20	0.001	0.0022525
chr1:234509259_rs10910420	COA6	-0.223907	-13.6378	9.56595e-20	2.3097e-15	9.56595e-20	0.001	0.0022525
chr7:55833413_rs10273761	CO9	-0.927269	-13.5266	1.37553e-19	5.84454e-15	1.37553e-19	0.001	0.0022525
chr1:182975102_rs9943067	LAMC1	0.497154	13.4895	1.55294e-19	3.69958e-15	1.55294e-19	0.001	0.0022525
chr3:134263991_rs7372770	ANAPC13	-0.235807	-13.4618	1.70086e-19	3.38335e-15	1.70086e-19	0.001	0.0022525
chr1:3547029_rs71634350	TPRG1L	0.243744	13.3679	2.31609e-19	5.35114e-15	2.31609e-19	0.001	0.0022525
chr20:1889858_rs6081121	AK093519	-3.61593	-13.3469	2.48165e-19	2.26469e-15	2.48165e-19	0.001	0.0022525
chr2:200626678_rs11687699	FTCDNL1	0.528434	13.1219	5.2259e-19	2.87926e-14	5.2259e-19	0.001	0.0022525
chr19:3763575_rs4807507	MRPL54	-0.290879	-13.1072	5.48787e-19	3.37888e-14	5.48787e-19	0.001	0.0022525
chr22:45797954_rs4605479	FAM118A	-0.885648	-12.9516	9.22253e-19	1.58297e-14	9.22253e-19	0.001	0.0022525
chr17:39946683_rs2883071	JUP	1.21773	12.8825	1.16256e-18	4.38387e-14	1.16256e-18	0.001	0.0022525
chr3:134310867_rs13071551	CEP63	0.186937	12.8739	1.19667e-18	2.12915e-14	1.19667e-18	0.001	0.0022525
chr4:57372243_rs6824893	SRP72	0.18012	12.8687	1.21796e-18	1.88123e-14	1.21796e-18	0.001	0.0022525
chr19:50848025_rs59323905	NAPSB	1.35094	12.6893	2.22914e-18	1.21998e-13	2.22914e-18	0.001	0.0022525
chr9:192574_rs3008133	CBWD1	0.712957	12.6474	2.56793e-18	2.52093e-13	2.56793e-18	0.001	0.0022525
chr16:67554340_rs11867039	ATP6V0D1	0.24062	12.6236	2.78366e-18	2.5477e-13	2.78366e-18	0.001	0.0022525
chr9:114434070_rs7045665	DNAJC25-GNG10	0.26775	12.5826	3.19958e-18	2.52093e-13	3.19958e-18	0.001	0.0022525
chr12:109014756_rs8179151	SELPLG	-3.11234	-12.5743	3.29061e-18	8.07281e-14	3.29061e-18	0.001	0.0022525
chr17:61806264_rs59596917	FTSJ3	-0.207561	-12.5531	3.53587e-18	1.04416e-13	3.53587e-18	0.001	0.0022525
chr8:87037225_rs6985937	CA2	-0.685245	-12.5278	3.85344e-18	3.20124e-13	3.85344e-18	0.001	0.0022525
chr16:68298024_rs12102971	SLC7A6	-0.253335	-12.5038	4.18096e-18	3.6899e-13	4.18096e-18	0.001	0.0022525
chr12:109014756_rs8179151	CORO1C	0.346836	12.4671	4.73921e-18	1.10282e-13	4.73921e-18	0.001	0.0022525
chr11:8014479_rs4758267	EIF3F	0.199549	12.4083	5.79236e-18	1.54517e-13	5.79236e-18	0.001	0.0022525
chr18:5245861_rs66482644	LINC00667	-0.545218	-12.3999	5.96044e-18	1.59609e-13	5.96044e-18	0.001	0.0022525
chr7:130346553_rs10224971	COPG2	-0.517101	-12.3904	6.15582e-18	1.2753e-13	6.15582e-18	0.001	0.0022525
chr13:43604332_rs17624230	DNAJC15	0.324289	12.3749	6.49144e-18	1.33846e-12	6.49144e-18	0.001	0.0022525
chr9:79315483_rs620737	PRUNE2	1.51052	12.3192	7.85475e-18	5.23471e-13	7.85475e-18	0.001	0.0022525
chr7:150457308_rs4554383	AK125599	1.11001	12.3159	7.94607e-18	1.47521e-13	7.94607e-18	0.001	0.0022525
chr4:7932073_rs56078222	AFAP1	-1.90705	-12.2943	8.55651e-18	7.47206e-14	8.55651e-18	0.001	0.0022525
chr1:46816928_rs1812705	NSUN4	0.313195	12.2386	1.03609e-17	1.62782e-13	1.03609e-17	0.001	0.0022525
chr3:33860133_rs9828982	PDCD6IP	0.120871	12.1905	1.22269e-17	1.0652e-13	1.22269e-17	0.001	0.0022525
chr7:150293407_rs12673197	GIMAP6	-0.911295	-12.1581	1.36695e-17	2.3362e-13	1.36695e-17	0.001	0.0022525
chr17:45771816_rs62074054	TBKBP1	0.409674	12.133	1.49044e-17	1.48906e-13	1.49044e-17	0.001	0.0022525
chr15:41599902_rs28687846	OIP5-AS1	-0.133838	-12.1242	1.53651e-17	6.55819e-13	1.53651e-17	0.001	0.0022525
chr14:96827247_rs4905485	GSKIP	-0.203949	-12.1112	1.60735e-17	5.67007e-13	1.60735e-17	0.001	0.0022525
chr1:54861540_rs213481	SSBP3	-0.516469	-12.0703	1.8511e-17	2.34569e-13	1.8511e-17	0.001	0.0022525
chr2:172630729_rs35379278	DYNC1I2	0.0987185	12.0597	1.92009e-17	7.90858e-13	1.92009e-17	0.001	0.0022525
chr14:67965452_rs11158671	TMEM229B	-0.656123	-12.05	1.98615e-17	6.88555e-13	1.98615e-17	0.001	0.0022525
chr9:139369062_rs3812595	SEC16A	0.20392	11.9839	2.49753e-17	1.42857e-12	2.49753e-17	0.001	0.0022525
chr8:59471187_rs9297997	SDCBP	-0.174743	-11.9825	2.50919e-17	8.34962e-13	2.50919e-17	0.001	0.0022525
chr20:3746070_rs6139202	C20orf27	-0.548685	-11.9698	2.62234e-17	1.8002e-13	2.62234e-17	0.001	0.0022525
chr12:6570539_rs2244083	TAPBPL	-0.54067	-11.8712	3.69608e-17	6.63856e-13	3.69608e-17	0.001	0.0022525
chr17:79642556_rs12945187	ARL16	0.547043	11.8662	3.76035e-17	3.50289e-13	3.76035e-17	0.001	0.0022525
chr20:44645339_rs3918270	SLC12A5	-0.781988	-11.8499	3.98024e-17	2.62592e-13	3.98024e-17	0.001	0.0022525
chr14:31089772_rs229141	SCFD1	0.153721	11.8468	4.02371e-17	1.20755e-12	4.02371e-17	0.001	0.0022525
chr9:114948560_rs12342459	MIR3134	0.323586	11.8059	4.64093e-17	2.05972e-12	4.64093e-17	0.001	0.0022525
chr14:21538067_rs8019890	ARHGEF40	0.349606	11.8007	4.72681e-17	1.35776e-12	4.72681e-17	0.001	0.0022525
chr17:62976405_rs58511951	AMZ2P1	-0.980028	-11.7688	5.28429e-17	4.37038e-13	5.28429e-17	0.001	0.0022525
chr5:148771844_rs353259	PCYOX1L	-0.35917	-11.7639	5.37472e-17	4.94814e-13	5.37472e-17	0.001	0.0022525
chr12:9082581_rs4883201	M6PR	0.14204	11.7186	6.29848e-17	1.06027e-12	6.29848e-17	0.001	0.0022525
chr5:149826526_rs4841	RPS14	0.241042	11.7179	6.31514e-17	5.73905e-13	6.31514e-17	0.001	0.0022525
chr7:99952828_rs76798830	PILRB	-0.3505	-11.6976	6.77889e-17	1.04449e-12	6.77889e-17	0.001	0.0022525
chr4:17582051_rs3796812	LAP3	0.318794	11.6207	8.87999e-17	6.28806e-13	8.87999e-17	0.001	0.0022525
chr7:97920623_rs7015	BRI3	0.253291	11.6197	8.91242e-17	1.31082e-12	8.91242e-17	0.001	0.0022525
chr2:85546052_rs1053561	TGOLN2	0.0973648	11.5898	9.90173e-17	3.151e-12	9.90173e-17	0.001	0.0022525
chr3:52891756_rs7620706	TMEM110-MUSTN1	-0.296521	-11.5763	1.0382e-16	6.69006e-13	1.0382e-16	0.001	0.0022525
chr17:80679455_rs58867683	FN3KRP	0.247091	11.5692	1.06448e-16	7.68593e-13	1.06448e-16	0.001	0.0022525
chr11:66202215_rs3107024	PELI3	0.895257	11.5415	1.17366e-16	2.17719e-12	1.17366e-16	0.001	0.0022525
chr19:52004743_rs3810110	SIGLEC12	2.10632	11.5012	1.35316e-16	5.60093e-12	1.35316e-16	0.001	0.0022525
chr22:37970462_rs5756739	LGALS2	1.90467	11.4484	1.63102e-16	1.78789e-12	1.63102e-16	0.001	0.0022525
chr14:20934529_rs113404144	PNP	0.382077	11.3678	2.16946e-16	5.13199e-12	2.16946e-16	0.001	0.0022525
chr15:42191519_rs11070353	SPTBN5	1.02342	11.3086	2.6778e-16	6.52198e-12	2.6778e-16	0.001	0.0022525
chr11:65648135_rs645900	CTSW	-0.767087	-11.2388	3.43283e-16	5.12984e-12	3.43283e-16	0.001	0.0022525
chr12:123180061_rs1798219	HCAR1	-1.06623	-11.2299	3.54286e-16	5.57822e-12	3.54286e-16	0.001	0.0022525
chr14:24099375_rs222728	DHRS2	1.26019	11.2209	3.65805e-16	8.31243e-12	3.65805e-16	0.001	0.0022525
chr5:64902209_rs62369059	CENPK	-0.62381	-11.2111	3.78906e-16	2.83366e-12	3.78906e-16	0.001	0.0022525
chr4:37831269_rs28580416	PGM2	-0.491844	-11.1252	5.15001e-16	3.3058e-12	5.15001e-16	0.001	0.0022525
chr10:75575963_rs11000785	NDST2	-0.182572	-11.1077	5.48226e-16	1.49273e-11	5.48226e-16	0.001	0.0022525
chr6:123031399_rs9490530	PKIB	1.22004	11.1009	5.61781e-16	2.50307e-12	5.61781e-16	0.001	0.0022525
chr2:86398206_rs2288114	IMMT	0.0956528	11.0569	6.57537e-16	1.85287e-11	6.57537e-16	0.001	0.0022525
chr18:12883308_rs55982017	PTPN2	0.31057	11.0542	6.64048e-16	7.40801e-12	6.64048e-16	0.001	0.0022525
chr20:1599142_rs2209313	SIRPB1	-2.11421	-11.0495	6.7529e-16	3.86894e-12	6.7529e-16	0.001	0.0022525
chr2:71618599_rs12478953	DYSF	0.481795	11.0306	7.22801e-16	2.00614e-11	7.22801e-16	0.001	0.0022525
chr12:50637295_rs12828340	LIMA1	-0.389939	-10.9869	8.45474e-16	1.24306e-11	8.45474e-16	0.001	0.0022525
chr6:6578927_rs7757934	LY86	-0.572805	-10.9735	8.87339e-16	3.78499e-12	8.87339e-16	0.001	0.0022525
chr12:69752509_rs7136238	YEATS4	0.224849	10.973	8.88939e-16	1.28928e-11	8.88939e-16	0.001	0.0022525
chr18:55238820_rs2272783	FECH	0.518371	10.9717	8.92812e-16	9.72571e-12	8.92812e-16	0.001	0.0022525
chr12:6605105_rs7960757	MRPL51	0.16393	10.9669	9.08516e-16	1.28928e-11	9.08516e-16	0.001	0.0022525
chr11:73680063_rs599277	UCP2	-0.275138	-10.9615	9.26187e-16	1.15874e-11	9.26187e-16	0.001	0.0022525
chr8:142337790_rs6986779	SLC45A4	0.312262	10.9202	1.0749e-15	2.02537e-11	1.0749e-15	0.001	0.0022525
chr6:32625037_rs77685459	HLA-DQA1	0.704455	10.9098	1.11566e-15	4.66849e-12	1.11566e-15	0.001	0.0022525
chr16:31171174_rs17708638	PRSS36	0.449489	10.8875	1.20917e-15	3.5153e-11	1.20917e-15	0.001	0.0022525
chr20:44420637_rs2664539	DNTTIP1	-0.179293	-10.8763	1.25908e-15	6.46073e-12	1.25908e-15	0.001	0.0022525
chr8:82785286_rs1376841	SNX16	0.26705	10.8638	1.31699e-15	2.2619e-11	1.31699e-15	0.001	0.0022525
chr1:179107430_rs2791943	ABL2	-0.125017	-10.8595	1.33752e-15	9.75428e-12	1.33752e-15	0.001	0.0022525
chr6:32852569_rs116371500	PSMB9	-0.242865	-10.8594	1.33807e-15	5.53702e-12	1.33807e-15	0.001	0.0022525
chr10:33165226_rs2488305	ITGB1	0.124801	10.8478	1.39549e-15	3.3154e-11	1.39549e-15	0.001	0.0022525
chr12:6497260_rs2364481	LTBR	0.279365	10.8376	1.44768e-15	1.8932e-11	1.44768e-15	0.001	0.0022525
chr11:33743019_rs831630	CD59	0.227082	10.8255	1.51251e-15	1.80818e-11	1.51251e-15	0.001	0.0022525
chr1:2474205_rs942824	TNFRSF14	-0.14104	-10.8171	1.55921e-15	1.13095e-11	1.55921e-15	0.001	0.0022525
chr20:33995780_rs6142377	UQCC	-0.166774	-10.8152	1.56979e-15	7.79269e-12	1.56979e-15	0.001	0.0022525
chr11:44091399_rs7951555	ACCS	-0.836254	-10.7745	1.81901e-15	2.16656e-11	1.81901e-15	0.001	0.0022525
chr17:27895528_rs497993	TP53I13	-0.164008	-10.742	2.04622e-15	1.18506e-11	2.04622e-15	0.001	0.0022525
chr1:160257980_rs7523769	COPA	0.141138	10.7301	2.13585e-15	1.52648e-11	2.13585e-15	0.001	0.0022525
chr13:50133321_rs9568257	RCBTB1	0.275038	10.6635	2.71971e-15	1.77596e-10	2.71971e-15	0.001	0.0022525
chr12:10118135_rs147402817	CLEC12A	-0.904957	-10.6384	2.97987e-15	3.17191e-11	2.97987e-15	0.001	0.0022525
chr1:22348556_rs11586488	LINC00339	-0.396402	-10.6159	3.23403e-15	2.23102e-11	3.23403e-15	0.001	0.0022525
chr6:149890053_rs9331657	GINM1	0.179367	10.6129	3.26877e-15	1.1923e-11	3.26877e-15	0.001	0.0022525
chr14:100538217_rs1190968	EVL	-0.57765	-10.6097	3.30711e-15	4.26263e-11	3.30711e-15	0.001	0.0022525
chr1:201954731_rs6702211	RNPEP	-0.285551	-10.5999	3.42726e-15	2.35222e-11	3.42726e-15	0.001	0.0022525
chr1:165600267_rs4147593	MGST3	0.156291	10.5434	4.21029e-15	2.83518e-11	4.21029e-15	0.001	0.0022525
chr1:53408326_rs1672913	SCP2	-0.152543	-10.5255	4.49448e-15	2.99062e-11	4.49448e-15	0.001	0.0022525
chr11:62328038_rs11231144	EEF1G	0.119891	10.4575	5.76087e-15	6.64104e-11	5.76087e-15	0.001	0.0022525
chr9:139272058_rs10781507	CARD9	-0.148932	-10.4059	6.95916e-15	1.14358e-10	6.95916e-15	0.001	0.0022525
chr11:68667198_rs636049	MRPL21	0.162662	10.3847	7.52216e-15	8.4895e-11	7.52216e-15	0.001	0.0022525
chr1:116192165_rs61800293	VANGL1	0.466445	10.3803	7.64262e-15	4.84805e-11	7.64262e-15	0.001	0.0022525
chr16:4740444_rs1045519	MGRN1	-0.181631	-10.3589	8.26611e-15	1.874e-10	8.26611e-15	0.001	0.0022525
chr17:7209386_rs28636077	EIF5A	0.0806274	10.3478	8.61179e-15	4.66099e-11	8.61179e-15	0.001	0.0022525
chr9:37422656_rs4878690	GRHPR	-0.17062	-10.3459	8.66982e-15	1.29195e-10	8.66982e-15	0.001	0.0022525
chr14:23549319_rs1885097	C14orf119	0.111531	10.3457	8.67548e-15	1.04852e-10	8.67548e-15	0.001	0.0022525
chr15:34634626_rs12593384	NOP10	-0.270257	-10.3285	9.24062e-15	1.43375e-10	9.24062e-15	0.001	0.0022525
chr20:33880146_rs111916968	EIF6	-0.271976	-10.3039	1.01153e-14	3.97311e-11	1.01153e-14	0.001	0.0022525
chr1:1660110_rs1801781	MMP23A	-2.27105	-10.2759	1.12136e-14	6.59792e-11	1.12136e-14	0.001	0.0022525
chr7:150293407_rs12673197	GIMAP5	-0.568005	-10.2433	1.2639e-14	7.98875e-11	1.2639e-14	0.001	0.0022525
chr16:19519521_rs3794697	GDE1	0.125783	10.2388	1.28527e-14	2.64673e-10	1.28527e-14	0.001	0.0022525
chr11:5664684_rs16933844	TRIM6-TRIM34	0.344579	10.2116	1.42068e-14	1.46041e-10	1.42068e-14	0.001	0.0022525
chr21:35029572_rs4817592	ITSN1	0.193681	10.1941	1.51526e-14	8.37918e-10	1.51526e-14	0.001	0.0022525
chr14:35598370_rs28765972	PPP2R3C	0.143261	10.1842	1.57107e-14	1.755e-10	1.57107e-14	0.001	0.0022525
chr10:127528267_rs3781058	DHX32	0.162443	10.1681	1.6673e-14	1.74955e-10	1.6673e-14	0.001	0.0022525
chr1:39492462_rs3768324	NDUFS5	0.157352	10.1613	1.70977e-14	9.73933e-11	1.70977e-14	0.001	0.0022525
chr8:82043612_rs7813567	PAG1	0.347568	10.1575	1.73389e-14	1.63391e-10	1.73389e-14	0.001	0.0022525
chr17:1454810_rs3785965	PITPNA	-0.246425	-10.1543	1.7547e-14	8.99638e-11	1.7547e-14	0.001	0.0022525
chr22:24255296_rs4822455	GSTT2	1.2841	10.1533	1.76125e-14	1.37556e-10	1.76125e-14	0.001	0.0022525
chr12:95396906_rs10859822	NDUFA12	-0.186177	-10.1321	1.90425e-14	1.59009e-10	1.90425e-14	0.001	0.0022525
chr5:175810529_rs6862846	HIGD2A	0.309177	10.0746	2.35479e-14	1.36405e-10	2.35479e-14	0.001	0.0022525
chr10:13160212_rs57199113	OPTN	0.444323	10.0726	2.37291e-14	1.84558e-10	2.37291e-14	0.001	0.0022525
chr2:191166212_rs906916	HIBCH	-0.232496	-10.0706	2.38993e-14	4.92864e-10	2.38993e-14	0.001	0.0022525
chr3:48478039_rs13069724	ATRIP	0.19718	10.0597	2.48858e-14	9.79115e-11	2.48858e-14	0.001	0.0022525
chr21:40769807_rs2837005	WRB	0.205378	10.0543	2.53895e-14	1.08778e-09	2.53895e-14	0.001	0.0022525
chr17:44635397_rs116928005	KANSL1-AS1	-3.60898	-10.0339	2.73828e-14	1.34752e-10	2.73828e-14	0.001	0.0022525
chr1:151659071_rs17641780	SNX27	-0.157463	-10.0287	2.79095e-14	1.44682e-10	2.79095e-14	0.001	0.0022525
chr7:135357476_rs3110823	C7orf73	0.207284	10.028	2.79839e-14	1.58772e-10	2.79839e-14	0.001	0.0022525
chr11:18376752_rs6486419	HPS5	0.245247	10.0124	2.96474e-14	2.83963e-10	2.96474e-14	0.001	0.0022525
chr7:43804695_rs1181574	COA1	0.215624	10.0078	3.01577e-14	1.68049e-10	3.01577e-14	0.001	0.0022525
chr22:37970462_rs5756739	CDC42EP1	1.17358	10.0001	3.10336e-14	2.30237e-10	3.10336e-14	0.001	0.0022525
chr19:45449284_rs2288911	APOC4-APOC2	1.34311	9.99648	3.14489e-14	6.97769e-10	3.14489e-14	0.001	0.0022525
chr12:49573296_rs10875931	TUBA1A	0.247947	9.99129	3.20589e-14	2.56207e-10	3.20589e-14	0.001	0.0022525
chr9:131901458_rs3124511	CRAT	0.221034	9.97062	3.4613e-14	3.84458e-10	3.4613e-14	0.001	0.0022525
chr7:1199365_rs7458082	ZFAND2A	0.719782	9.95077	3.7258e-14	2.01379e-10	3.7258e-14	0.001	0.0022525
chr10:12137680_rs7081586	DHTKD1	0.290827	9.94071	3.86748e-14	2.71656e-10	3.86748e-14	0.001	0.0022525
chr15:63406785_rs6494391	LACTB	-0.170232	-9.92499	4.09993e-14	4.77302e-10	4.09993e-14	0.001	0.0022525
chr8:23082971_rs79037040	TNFRSF10A	0.306007	9.92314	4.1283e-14	3.56007e-10	4.1283e-14	0.001	0.0022525
chr19:39925482_rs480595	RPS16	-0.157379	-9.90249	4.45739e-14	9.58746e-10	4.45739e-14	0.001	0.0022525
chr7:149571466_rs7795944	ATP6V0E2	-0.48143	-9.86043	5.21191e-14	2.70244e-10	5.21191e-14	0.001	0.0022525
chr19:19740729_rs880090	LPAR2	-0.271896	-9.85596	5.2994e-14	1.10138e-09	5.2994e-14	0.001	0.0022525
chr4:47848377_rs10938499	NFXL1	-0.937726	-9.81788	6.10633e-14	3.40648e-10	6.10633e-14	0.001	0.0022525
chr10:29759782_rs7906814	PTCHD3P1	-0.230467	-9.81723	6.12109e-14	4.0751e-10	6.12109e-14	0.001	0.0022525
chr22:44422638_rs11914048	PARVB	-0.265657	-9.80716	6.35507e-14	4.24472e-10	6.35507e-14	0.001	0.0022525
chr11:62380425_rs3923805	EML3	-0.0918776	-9.80249	6.4667e-14	5.94677e-10	6.4667e-14	0.001	0.0022525
chr15:90775913_rs8041338	CIB1	-0.176626	-9.79104	6.74874e-14	7.0577e-10	6.74874e-14	0.001	0.0022525
chr3:126249265_rs744233	CHST13	0.452664	9.77931	7.0502e-14	2.49769e-10	7.0502e-14	0.001	0.0022525
chr3:14988060_rs6791192	FGD5-AS1	-0.126515	-9.75965	7.58655e-14	2.64096e-10	7.58655e-14	0.001	0.0022525
chr6:125620444_rs987166	HDDC2	0.46142	9.74431	8.03357e-14	1.94367e-10	8.03357e-14	0.001	0.0022525
chr9:34151280_rs10971956	NUDT2	-0.440986	-9.70584	9.2746e-14	9.0453e-10	9.2746e-14	0.001	0.0022525
chr10:79336052_rs2619608	KCNMA1	-1.27753	-9.67365	1.04603e-13	6.86957e-10	1.04603e-13	0.001	0.0022525
chr1:200625043_rs35249716	DDX59	0.199045	9.65829	1.10786e-13	5.21348e-10	1.10786e-13	0.001	0.0022525
chr16:85041091_rs9938089	ZDHHC7	0.12979	9.65364	1.12732e-13	1.4213e-09	1.12732e-13	0.001	0.0022525
chr19:11691040_rs35879291	ACP5	0.263474	9.62694	1.24575e-13	2.14778e-09	1.24575e-13	0.001	0.0022525
chr11:126103368_rs675412	FOXRED1	-0.353907	-9.60293	1.36295e-13	1.17944e-09	1.36295e-13	0.001	0.0022525
chr2:197968251_rs12621335	ANKRD44	-0.182094	-9.5814	1.47745e-13	2.33074e-09	1.47745e-13	0.001	0.0022525
chr20:3672389_rs45611736	SIGLEC1	0.674876	9.54724	1.67937e-13	5.08817e-10	1.67937e-13	0.001	0.0022525
chr12:53437711_rs7135524	EIF4B	0.151344	9.54591	1.68777e-13	1.08785e-09	1.68777e-13	0.001	0.0022525
chr9:97171337_rs10125744	HIATL1	0.151869	9.52587	1.8196e-13	1.68554e-09	1.8196e-13	0.001	0.0022525
chr12:29919461_rs4931215	TMTC1	-0.645816	-9.51838	1.87151e-13	1.1822e-09	1.87151e-13	0.001	0.0022525
chr7:26155514_rs2107348	NFE2L3	0.561391	9.50443	1.9721e-13	7.40256e-10	1.9721e-13	0.001	0.0022525
chr7:64150267_rs2862797	ZNF107	0.389418	9.50156	1.99349e-13	7.47109e-10	1.99349e-13	0.001	0.0022525
chr14:67659854_rs148795114	ATP6V1D	-0.163021	-9.49028	2.07973e-13	1.66605e-09	2.07973e-13	0.001	0.0022525
chr5:68390284_rs337259	SLC30A5	-0.127828	-9.48304	2.1371e-13	1.07888e-09	2.1371e-13	0.001	0.0022525
chr18:43666952_rs8097521	ATP5A1	0.104657	9.48224	2.14351e-13	1.83773e-09	2.14351e-13	0.001	0.0022525
chr22:36926306_rs9680636	EIF3D	-0.188235	-9.44008	2.51169e-13	1.55127e-09	2.51169e-13	0.001	0.0022525
chr19:52255196_rs4802859	FPR1	-0.892933	-9.40724	2.84204e-13	4.60484e-09	2.84204e-13	0.001	0.0022525
chr16:5083483_rs2972272	NAGPA	-0.174041	-9.39597	2.96521e-13	3.25664e-09	2.96521e-13	0.001	0.0022525
chr10:51807814_rs12146177	FAM21A	1.00096	9.38303	3.11332e-13	1.49991e-09	3.11332e-13	0.001	0.0022525
chr2:209037176_rs7604079	IDH1	-0.192512	-9.37929	3.15742e-13	4.30089e-09	3.15742e-13	0.001	0.0022525
chr9:139969197_rs11794029	UAP1L1	0.222497	9.37275	3.23618e-13	2.61122e-09	3.23618e-13	0.001	0.0022525
chr17:4833385_rs9902753	GP1BA	0.940275	9.36756	3.30011e-13	1.20989e-09	3.30011e-13	0.001	0.0022525
chr1:89441642_rs12120164	CCBL2	0.209935	9.3665	3.31335e-13	1.32936e-09	3.31335e-13	0.001	0.0022525
chr11:62334908_rs1061093	TUT1	0.115974	9.35344	3.48056e-13	2.88065e-09	3.48056e-13	0.001	0.0022525
chr12:102091379_rs71440841	CHPT1	-0.281537	-9.33424	3.74183e-13	2.16488e-09	3.74183e-13	0.001	0.0022525
chr12:25226017_rs4963600	LRMP	0.325947	9.31521	4.02017e-13	2.30904e-09	4.02017e-13	0.001	0.0022525
chr19:49400634_rs7260579	NUCB1	0.270457	9.31378	4.04193e-13	6.39994e-09	4.04193e-13	0.001	0.0022525
chr9:115598948_rs6477962	SNX30	-0.109225	-9.30715	4.14429e-13	3.19708e-09	4.14429e-13	0.001	0.0022525
chr10:102039187_rs34955138	CWF19L1	-0.210013	-9.29344	4.36445e-13	2.05368e-09	4.36445e-13	0.001	0.0022525
chr9:34333855_rs11788425	KIAA1161	-0.33645	-9.28626	4.48444e-13	3.37539e-09	4.48444e-13	0.001	0.0022525
chr1:161313652_rs16832846	SDHC	0.105409	9.27537	4.6726e-13	1.79267e-09	4.6726e-13	0.001	0.0022525
chr10:16864327_rs780634	RSU1	-0.148792	-9.27273	4.71933e-13	2.21636e-09	4.71933e-13	0.001	0.0022525
chr1:146717564_rs11239953	CHD1L	0.232934	9.26345	4.88769e-13	1.84458e-09	4.88769e-13	0.001	0.0022525
chr6:52520968_rs77163258	LOC730101	-0.520112	-9.25672	5.01357e-13	1.05552e-09	5.01357e-13	0.001	0.0022525
chr7:1547220_rs67780721	INTS1	0.22621	9.25139	5.1156e-13	1.72735e-09	5.1156e-13	0.001	0.0022525
chr6:52465835_rs7771469	TRAM2	0.270145	9.21969	5.76666e-13	1.19727e-09	5.76666e-13	0.001	0.0022525
chr1:37987742_rs4653297	MEAF6	-0.117871	-9.20645	6.06279e-13	2.21375e-09	6.06279e-13	0.001	0.0022525
chr4:87914982_rs6848056	AFF1	-0.178233	-9.20363	6.12781e-13	2.87359e-09	6.12781e-13	0.001	0.0022525
chr11:118883491_rs60065241	TRAPPC4	-0.214057	-9.1831	6.62287e-13	5.13779e-09	6.62287e-13	0.001	0.0022525
chr14:65579414_rs34459643	MAX	-0.108382	-9.17972	6.70789e-13	5.109e-09	6.70789e-13	0.001	0.0022525
chr13:53046836_rs11618716	CKAP2	0.221714	9.17864	6.73558e-13	5.29774e-09	6.73558e-13	0.001	0.0022525
chr2:240920291_rs967476	NDUFA10	0.202247	9.17502	6.82835e-13	8.43023e-09	6.82835e-13	0.001	0.0022525
chr10:127738918_rs1710278	ADAM12	0.508871	9.17184	6.91121e-13	3.06231e-09	6.91121e-13	0.001	0.0022525
chr8:96194737_rs10956941	PLEKHF2	0.170746	9.14867	7.54467e-13	4.91367e-09	7.54467e-13	0.001	0.0022525
chr16:68811737_rs35648619	CDH1	-1.25892	-9.14425	7.6722e-13	8.13692e-09	7.6722e-13	0.001	0.0022525
chr5:42983823_rs309909	AK056817	0.282838	9.14325	7.70126e-13	3.66815e-09	7.70126e-13	0.001	0.0022525
chr1:212949235_rs112610608	NSL1	-0.126051	-9.11876	8.44984e-13	2.98044e-09	8.44984e-13	0.001	0.0022525
chr10:127509294_rs10901450	UROS	0.140264	9.09629	9.20123e-13	3.95346e-09	9.20123e-13	0.001	0.0022525
chr16:28977020_rs7500321	SPNS1	0.178253	9.07977	9.79613e-13	1.02574e-08	9.79613e-13	0.001	0.0022525
chr8:38853620_rs6991968	TM2D2	0.102186	9.06055	1.05372e-12	6.73896e-09	1.05372e-12	0.001	0.0022525
chr3:9955183_rs279566	IL17RC	-0.160757	-9.04906	1.10066e-12	2.91322e-09	1.10066e-12	0.001	0.0022525
chr11:34897627_rs7115409	APIP	0.408967	9.00554	1.29842e-12	8.67708e-09	1.29842e-12	0.001	0.0022525
chr4:6610622_rs4689486	MAN2B2	0.17882	9.00264	1.3128e-12	5.84569e-09	1.3128e-12	0.001	0.0022525
chr1:182136401_rs61805075	GLUL	-0.439844	-8.99877	1.33227e-12	4.51976e-09	1.33227e-12	0.001	0.0022525
chr7:93623458_rs2286845	BET1	0.19948	8.99643	1.34417e-12	4.27454e-09	1.34417e-12	0.001	0.0022525
chr11:130009306_rs7103088	ST14	1.242	8.98109	1.42482e-12	9.50214e-09	1.42482e-12	0.001	0.0022525
chr2:190529231_rs12693551	ASNSD1	-0.119891	-8.97028	1.48458e-12	1.72878e-08	1.48458e-12	0.001	0.0022525
chr7:150294476_rs35114152	GIMAP1	-0.468298	-8.9604	1.54142e-12	4.82656e-09	1.54142e-12	0.001	0.0022525
chr11:68038870_rs79666127	C11orf24	-0.333406	-8.94729	1.62026e-12	1.06115e-08	1.62026e-12	0.001	0.0022525
chr9:130220698_rs7874743	RPL12	-0.160791	-8.94235	1.65095e-12	1.1095e-08	1.65095e-12	0.001	0.0022525
chr7:128142023_rs12539729	METTL2B	0.193118	8.93824	1.67697e-12	5.24027e-09	1.67697e-12	0.001	0.0022525
chr13:50283389_rs9562915	EBPL	0.387923	8.92785	1.74463e-12	1.3145e-08	1.74463e-12	0.001	0.0022525
chr1:161185058_rs2070901	FCER1G	-0.184281	-8.92202	1.78377e-12	5.97211e-09	1.78377e-12	0.001	0.0022525
chr11:118080520_rs4306318	AMICA1	-0.370862	-8.89899	1.94715e-12	1.24209e-08	1.94715e-12	0.001	0.0022525
chr10:27443623_rs3758403	MASTL	-0.256405	-8.89065	2.00994e-12	8.02425e-09	2.00994e-12	0.001	0.0022525
chr10:7230524_rs2462712	SFMBT2	-0.417275	-8.87817	2.10784e-12	8.38744e-09	2.10784e-12	0.001	0.0022525
chr1:222910211_rs73126814	BROX	-0.284556	-8.86571	2.21028e-12	7.27291e-09	2.21028e-12	0.001	0.0022525
chr19:2120314_rs4807201	AP3D1	0.0711939	8.86109	2.24952e-12	2.97856e-08	2.24952e-12	0.001	0.0022525
chr5:126832614_rs423597	PRRC1	0.195833	8.85328	2.31744e-12	1.03035e-08	2.31744e-12	0.001	0.0022525
chr8:101937455_rs964917	YWHAZ	0.098054	8.83631	2.47232e-12	1.43467e-08	2.47232e-12	0.001	0.0022525
chr6:42182762_rs7765328	MRPS10	-0.109069	-8.82952	2.53708e-12	4.32268e-09	2.53708e-12	0.001	0.0022525
chr4:142132202_rs9996068	ZNF330	0.166176	8.81669	2.66428e-12	1.13523e-08	2.66428e-12	0.001	0.0022525
chr14:94569247_rs8012444	IFI27L1	-0.448941	-8.81466	2.68505e-12	1.2916e-08	2.68505e-12	0.001	0.0022525
chr16:15862895_rs7198308	NDE1	0.198614	8.78799	2.97256e-12	2.28835e-08	2.97256e-12	0.001	0.0022525
chr11:66102769_rs7950463	RIN1	0.336376	8.78302	3.02944e-12	1.81082e-08	3.02944e-12	0.001	0.0022525
chr14:104097579_rs8021904	XRCC3	-0.148931	-8.7793	3.07269e-12	1.45373e-08	3.07269e-12	0.001	0.0022525
chr11:124759644_rs4635093	ROBO3	0.913686	8.769	3.19591e-12	1.86541e-08	3.19591e-12	0.001	0.0022525
chr2:128430669_rs34967118	LIMS2	-1.39334	-8.74313	3.52764e-12	3.37358e-08	3.52764e-12	0.001	0.0022525
chr12:42854205_rs3747562	PPHLN1	-0.0992622	-8.73738	3.60594e-12	1.45374e-08	3.60594e-12	0.001	0.0022525
chr2:88469770_rs6547757	THNSL2	-2.04083	-8.73026	3.70537e-12	3.49824e-08	3.70537e-12	0.001	0.0022525
chr10:118718210_rs4092881	KIAA1598	-0.189983	-8.72765	3.74255e-12	1.41931e-08	3.74255e-12	0.001	0.0022525
chr5:295018_rs28734903	SDHA	0.331573	8.72737	3.74651e-12	1.62415e-08	3.74651e-12	0.001	0.0022525
chr2:110371852_rs7603756	2018-09-10	08:29:07.628000	8.72193	3.82526e-12	3.58393e-08	3.82526e-12	0.001	0.0022525
chr17:47280536_rs6504602	GNGT2	0.665474	8.71765	3.88828e-12	1.23876e-08	3.88828e-12	0.001	0.0022525
chr14:100845457_rs12882934	WARS	0.265643	8.71434	3.93775e-12	1.76342e-08	3.93775e-12	0.001	0.0022525
chr5:40747999_rs453037	PRKAA1	0.104885	8.66813	4.69844e-12	1.99694e-08	4.69844e-12	0.001	0.0022525
chr10:14737912_rs2688838	FAM107B	-0.372959	-8.66661	4.72581e-12	1.74044e-08	4.72581e-12	0.001	0.0022525
chr15:75789444_rs4299117	PTPN9	0.110936	8.66079	4.83221e-12	2.93265e-08	4.83221e-12	0.001	0.0022525
chr6:26456069_rs9295690	BTN2A1	0.110986	8.65961	4.85396e-12	7.44879e-09	4.85396e-12	0.001	0.0022525
chr16:28837515_rs8049439	NPIPL1	-0.118089	-8.64229	5.18646e-12	3.8258e-08	5.18646e-12	0.001	0.0022525
chr6:110797605_rs2494552	SLC22A16	1.33444	8.63676	5.29734e-12	8.07413e-09	5.29734e-12	0.001	0.0022525
chr11:3811525_rs7924315	NUP98	-0.101998	-8.62867	5.46383e-12	2.82178e-08	5.46383e-12	0.001	0.0022525
chr11:30336425_rs3904780	ARL14EP	0.150799	8.62758	5.48676e-12	2.82909e-08	5.48676e-12	0.001	0.0022525
chr11:13713421_rs35207157	FAR1	-0.195814	-8.61395	5.78051e-12	2.95226e-08	5.78051e-12	0.001	0.0022525
chr2:42325861_rs35607741	EML4	0.164391	8.61024	5.86324e-12	5.10466e-08	5.86324e-12	0.001	0.0022525
chr10:77140864_rs7078507	C10orf11	-0.316071	-8.60467	5.98948e-12	2.15347e-08	5.98948e-12	0.001	0.0022525
chr1:179308994_rs2248818	SOAT1	-0.258062	-8.60377	6.01011e-12	1.79074e-08	6.01011e-12	0.001	0.0022525
chr6:167370230_rs2247314	RNASET2	-0.310289	-8.58941	6.34984e-12	9.48163e-09	6.34984e-12	0.001	0.0022525
chr20:23103867_rs844881	CD93	-0.698914	-8.58857	6.37024e-12	1.62617e-08	6.37024e-12	0.001	0.0022525
chr11:95570961_rs523153	CEP57	-0.122839	-8.58386	6.48626e-12	3.23091e-08	6.48626e-12	0.001	0.0022525
chr6:32575369_rs9271055	HLA-DRB5	0.441499	8.58026	6.57613e-12	9.76686e-09	6.57613e-12	0.001	0.0022525
chr5:1606844_rs116563943	LOC728613	0.973752	8.57394	6.73746e-12	2.72151e-08	6.73746e-12	0.001	0.0022525
chr1:203199081_rs73068228	CHIT1	-5.72443	-8.56656	6.93056e-12	2.03557e-08	6.93056e-12	0.001	0.0022525
chr7:75930759_rs2868371	HSPB1	0.299925	8.55558	7.22826e-12	1.91952e-08	7.22826e-12	0.001	0.0022525
chr16:30485393_rs11574938	ITGAL	-0.327407	-8.54941	7.40103e-12	5.36332e-08	7.40103e-12	0.001	0.0022525
chr6:32152442_rs114369408	RNF5	0.267685	8.54685	7.47401e-12	1.09246e-08	7.47401e-12	0.001	0.0022525
chr6:71443547_rs4706461	SMAP1	-0.130483	-8.54463	7.53794e-12	1.10047e-08	7.53794e-12	0.001	0.0022525
chr2:73297007_rs6720817	SFXN5	0.225304	8.53521	7.81492e-12	6.10499e-08	7.81492e-12	0.001	0.0022525
chr7:1613666_rs28625953	PSMG3	0.289074	8.51821	8.34102e-12	2.17722e-08	8.34102e-12	0.001	0.0022525
chr17:44619118_rs141349636	ARL17A	0.506405	8.51232	8.53157e-12	2.43429e-08	8.53157e-12	0.001	0.0022525
chr8:27969669_rs13282722	ELP3	-0.114058	-8.50237	8.86344e-12	4.3695e-08	8.86344e-12	0.001	0.0022525
chr2:242294913_rs3755397	2018-09-02	1899-12-29 20:05:23	-8.50092	8.91278e-12	6.75054e-08	8.91278e-12	0.001	0.0022525
chr5:143576926_rs6894738	YIPF5	0.0968223	8.48739	9.38731e-12	3.7181e-08	9.38731e-12	0.001	0.0022525
chr21:43990435_rs3827236	SLC37A1	0.338975	8.47903	9.69324e-12	9.63647e-08	9.69324e-12	0.001	0.0022525
chr7:56177066_rs1894834	PSPH	0.119385	8.46634	1.01769e-11	2.61405e-08	1.01769e-11	0.001	0.0022525
chr3:58292258_rs2292679	RPP14	0.143173	8.46175	1.03578e-11	2.48666e-08	1.03578e-11	0.001	0.0022525
chr3:120446626_rs9985346	GTF2E1	-0.194651	-8.45754	1.05264e-11	2.52525e-08	1.05264e-11	0.001	0.0022525
chr2:181899324_rs62181560	UBE2E3	-0.114121	-8.45432	1.06573e-11	7.94762e-08	1.06573e-11	0.001	0.0022525
chr5:77309710_rs2046894	AP3B1	0.112596	8.45075	1.08042e-11	4.18885e-08	1.08042e-11	0.001	0.0022525
chr14:51731306_rs8006432	TMX1	-0.0947411	-8.43335	1.15504e-11	4.02507e-08	1.15504e-11	0.001	0.0022525
chr19:14885714_rs12461047	EMR2	0.439267	8.40712	1.27742e-11	1.39513e-07	1.27742e-11	0.001	0.0022525
chr10:91152593_rs303218	IFIT5	0.380052	8.40612	1.28234e-11	4.06943e-08	1.28234e-11	0.001	0.0022525
chr7:6617247_rs11559147	ZDHHC4	-0.183131	-8.40316	1.29698e-11	3.19207e-08	1.29698e-11	0.001	0.0022525
chr4:27030406_rs28368708	STIM2	-0.206842	-8.38888	1.37008e-11	5.17722e-08	1.37008e-11	0.001	0.0022525
chr1:20917108_rs472629	CDA	-0.675425	-8.38215	1.40596e-11	3.8693e-08	1.40596e-11	0.001	0.0022525
chr7:148720071_rs10243245	PDIA4	-0.212904	-8.37486	1.44591e-11	3.51618e-08	1.44591e-11	0.001	0.0022525
chr11:66223158_rs1785640	DPP3	-0.159032	-8.36197	1.51935e-11	6.11488e-08	1.51935e-11	0.001	0.0022525
chr18:34361762_rs948636	TPGS2	0.296295	8.36154	1.52186e-11	5.99634e-08	1.52186e-11	0.001	0.0022525
chr3:48723302_rs6792510	NCKIPSD	-0.120686	-8.36078	1.52629e-11	3.5942e-08	1.52629e-11	0.001	0.0022525
chr1:12046089_rs873458	MFN2	0.0944173	8.30872	1.86443e-11	5.06781e-08	1.86443e-11	0.001	0.0022525
chr10:70886778_rs59183999	VPS26A	-0.14248	-8.30314	1.90484e-11	5.76284e-08	1.90484e-11	0.001	0.0022525
chr12:50297934_rs297918	FAIM2	-2.37198	-8.3005	1.92427e-11	6.67744e-08	1.92427e-11	0.001	0.0022525
chr1:71447519_rs646621	PTGER3	-0.574244	-8.29943	1.9322e-11	5.23344e-08	1.9322e-11	0.001	0.0022525
chr1:178989464_rs7520456	FAM20B	-0.156795	-8.28964	2.00633e-11	5.42327e-08	2.00633e-11	0.001	0.0022525
chr14:23372913_rs12437151	HAUS4	0.158058	8.27493	2.12315e-11	7.10408e-08	2.12315e-11	0.001	0.0022525
chr11:124096195_rs7946214	OR8G1	1.49531	8.27162	2.1504e-11	8.15635e-08	2.1504e-11	0.001	0.0022525
chr10:98001440_rs6584059	BLNK	-0.324873	-8.26373	2.21662e-11	6.62339e-08	2.21662e-11	0.001	0.0022525
chr14:99922406_rs8003384	SETD3	-0.0821034	-8.2535	2.30566e-11	7.53829e-08	2.30566e-11	0.001	0.0022525
chr5:65039667_rs2561227	NLN	-0.267349	-8.25227	2.31655e-11	8.51272e-08	2.31655e-11	0.001	0.0022525
chr18:21616379_rs11082898	TTC39C	0.292959	8.24966	2.34002e-11	8.46368e-08	2.34002e-11	0.001	0.0022525
chr17:73261276_rs8067326	MRPS7	-0.150061	-8.24559	2.37694e-11	6.06511e-08	2.37694e-11	0.001	0.0022525
chr8:82575783_rs2400589	IMPA1	0.188346	8.24555	2.37733e-11	1.07266e-07	2.37733e-11	0.001	0.0022525
chr7:128292036_rs62481923	FLJ45340	-0.241475	-8.24533	2.37931e-11	5.41581e-08	2.37931e-11	0.001	0.0022525
chr3:39448804_rs1472508	RPSA	0.101202	8.22739	2.54939e-11	5.63863e-08	2.54939e-11	0.001	0.0022525
chr5:134223593_rs3733897	TXNDC15	0.160281	8.21726	2.65075e-11	9.34538e-08	2.65075e-11	0.001	0.0022525
chr3:189012108_rs9867318	TPRG1	0.900408	8.21649	2.65862e-11	5.86402e-08	2.65862e-11	0.001	0.0022525
chr10:100176869_rs701801	HPS1	-0.120553	-8.21554	2.66837e-11	7.79074e-08	2.66837e-11	0.001	0.0022525
chr4:122582065_rs34579832	ANXA5	0.131848	8.21128	2.71254e-11	9.61773e-08	2.71254e-11	0.001	0.0022525
chr7:150293407_rs12673197	GIMAP8	-0.55629	-8.21125	2.71286e-11	6.08894e-08	2.71286e-11	0.001	0.0022525
chr1:38022452_rs2273014	GNL2	-0.0908962	-8.20911	2.73527e-11	7.27623e-08	2.73527e-11	0.001	0.0022525
chr5:79950724_rs2001675	DHFR	0.508346	8.20511	2.77768e-11	9.72709e-08	2.77768e-11	0.001	0.0022525
chr11:63570194_rs1307231	ATL3	-0.187532	-8.20289	2.80152e-11	1.01773e-07	2.80152e-11	0.001	0.0022525
chr12:69383865_rs2220951	CPM	0.217325	8.18689	2.97962e-11	1.0053e-07	2.97962e-11	0.001	0.0022525
chr15:50807461_rs3098184	SPPL2A	-0.209952	-8.18602	2.98961e-11	1.38094e-07	2.98961e-11	0.001	0.0022525
chr8:95825034_rs10112232	INTS8	-0.0981692	-8.15809	3.32924e-11	1.40958e-07	3.32924e-11	0.001	0.0022525
chr2:128053883_rs12463451	MAP3K2	0.109425	8.14999	3.43474e-11	1.74884e-07	3.43474e-11	0.001	0.0022525
chr2:71301959_rs34550823	NAGK	0.22443	8.14125	3.55237e-11	1.79144e-07	3.55237e-11	0.001	0.0022525
chr16:66889718_rs8054683	NAE1	0.17383	8.13868	3.58767e-11	2.14624e-07	3.58767e-11	0.001	0.0022525
chr21:40465901_rs4817987	ETS2	0.436398	8.12892	3.72524e-11	2.23055e-07	3.72524e-11	0.001	0.0022525
chr17:18093877_rs12946842	ALKBH5	-0.11533	-8.12588	3.76908e-11	9.30117e-08	3.76908e-11	0.001	0.0022525
chr9:14693270_rs71476227	ZDHHC21	-0.239793	-8.1157	3.91999e-11	1.84769e-07	3.91999e-11	0.001	0.0022525
chr13:115000465_rs61973461	CDC16	-0.113296	-8.1068	4.05676e-11	2.57746e-07	4.05676e-11	0.001	0.0022525
chr6:139341150_rs9403027	ABRACL	0.333394	8.10113	4.14649e-11	4.77845e-08	4.14649e-11	0.001	0.0022525
chr19:984578_rs2301811	WDR18	0.267213	8.09561	4.23555e-11	4.17252e-07	4.23555e-11	0.001	0.0022525
chr12:118502746_rs11610878	WSB2	-0.119487	-8.08293	4.44777e-11	1.44666e-07	4.44777e-11	0.001	0.0022525
chr9:35069608_rs489922	VCP	-0.0653924	-8.08116	4.47823e-11	2.09029e-07	4.47823e-11	0.001	0.0022525
chr14:74030518_rs2336136	HEATR4	-0.430639	-8.07896	4.51651e-11	1.32965e-07	4.51651e-11	0.001	0.0022525
chr1:203249413_rs2486935	BTG2	-0.190305	-8.0692	4.68976e-11	1.18576e-07	4.68976e-11	0.001	0.0022525
chr19:9312256_rs73498852	ZNF317	0.435954	8.05697	4.91623e-11	4.55176e-07	4.91623e-11	0.001	0.0022525
chr17:66031725_rs62084683	LINC00674	0.200041	8.05166	5.01783e-11	1.21033e-07	5.01783e-11	0.001	0.0022525
chr6:34720317_rs6906606	TAF11	-0.188358	-8.05128	5.02522e-11	5.64122e-08	5.02522e-11	0.001	0.0022525
chr16:3508587_rs8055501	NAA60	0.196767	8.05011	5.04796e-11	2.82221e-07	5.04796e-11	0.001	0.0022525
chr5:108690319_rs71586589	PJA2	0.0729988	8.0454	5.14065e-11	1.72595e-07	5.14065e-11	0.001	0.0022525
chr1:76218319_rs72686191	ACADM	-0.212264	-8.04234	5.20163e-11	1.30411e-07	5.20163e-11	0.001	0.0022525
chr6:35439932_rs12525930	RPL10A	0.0861182	8.03854	5.2785e-11	5.86883e-08	5.2785e-11	0.001	0.0022525
chr9:88720605_rs10780749	GOLM1	-0.261253	-8.02629	5.53389e-11	2.52891e-07	5.53389e-11	0.001	0.0022525
chr17:33571546_rs11080327	SLFN5	-0.288005	-8.02569	5.54663e-11	1.32532e-07	5.54663e-11	0.001	0.0022525
chr4:178362122_rs13106192	AGA	0.272229	8.01175	5.85321e-11	1.8474e-07	5.85321e-11	0.001	0.0022525
chr7:150258423_rs1879865	GIMAP4	-0.598722	-8.01016	5.88916e-11	1.14171e-07	5.88916e-11	0.001	0.0022525
chr2:202004190_rs10184098	PPIL3	0.417128	8.00813	5.93547e-11	2.73703e-07	5.93547e-11	0.001	0.0022525
chr5:87612642_rs4916718	TMEM161B-AS1	-0.425295	-8.00684	5.96504e-11	1.9069e-07	5.96504e-11	0.001	0.0022525
chr10:71972564_rs9415007	PPA1	-0.20066	-7.98141	6.58032e-11	1.70184e-07	6.58032e-11	0.001	0.0022525
chr16:462881_rs1204505	DECR2	-0.371505	-7.97461	6.75523e-11	3.61322e-07	6.75523e-11	0.001	0.0022525
chr22:26904541_rs12628373	TFIP11	0.157978	7.97015	6.87271e-11	2.98777e-07	6.87271e-11	0.001	0.0022525
chr9:131289600_rs869455	SPTAN1	-0.139701	-7.96608	6.98141e-11	3.04539e-07	6.98141e-11	0.001	0.0022525
chr10:126436279_rs2280450	METTL10	0.180336	7.96448	7.02457e-11	1.80709e-07	7.02457e-11	0.001	0.0022525
chr12:8317564_rs4391881	CLEC4A	-0.238894	-7.9576	7.21383e-11	2.25815e-07	7.21383e-11	0.001	0.0022525
chr5:94826655_rs2303650	TTC37	-0.123614	-7.95396	7.31573e-11	2.25833e-07	7.31573e-11	0.001	0.0022525
chr1:218516310_rs10495098	RRP15	-0.173752	-7.95086	7.4038e-11	1.76617e-07	7.4038e-11	0.001	0.0022525
chr11:108391322_rs11212695	KDELC2	0.404628	7.92794	8.08895e-11	2.56478e-07	8.08895e-11	0.001	0.0022525
chr3:49991167_rs11709503	RBM6	0.109403	7.92661	8.13082e-11	1.65438e-07	8.13082e-11	0.001	0.0022525
chr20:57260920_rs6100163	NPEPL1	0.162904	7.91336	8.55761e-11	1.91509e-07	8.55761e-11	0.001	0.0022525
chr17:42380077_rs7219704	SLC25A39	0.101023	7.9115	8.61925e-11	1.98768e-07	8.61925e-11	0.001	0.0022525
chr19:55897327_rs17700376	RPL28	0.127236	7.89496	9.18802e-11	7.85702e-07	9.18802e-11	0.001	0.0022525
chr3:58446010_rs7631010	PDHB	-0.0751054	-7.87509	9.92086e-11	1.98456e-07	9.92086e-11	0.001	0.0022525
chr1:109640585_rs555401	TMEM167B	0.10477	7.87459	9.94018e-11	2.30456e-07	9.94018e-11	0.001	0.0022525
chr2:217484224_rs56018618	IGFBP2	-1.14343	-7.87004	1.01163e-10	4.27271e-07	1.01163e-10	0.001	0.0022525
chr17:38779942_rs8066541	SMARCE1	0.0994405	7.86075	1.04862e-10	2.39484e-07	1.04862e-10	0.001	0.0022525
chr2:47575249_rs77129373	MSH2	-0.424313	-7.8595	1.05369e-10	4.43009e-07	1.05369e-10	0.001	0.0022525
chr17:1625215_rs11652502	MIR22HG	-0.221676	-7.85672	1.06509e-10	2.4291e-07	1.06509e-10	0.001	0.0022525
chr1:159272060_rs2251746	FCER1A	-0.828312	-7.85225	1.08363e-10	2.47289e-07	1.08363e-10	0.001	0.0022525
chr8:145031968_rs55831924	PLEC	0.169405	7.84736	1.10428e-10	4.37944e-07	1.10428e-10	0.001	0.0022525
chr22:39663513_rs5757587	PDGFB	0.36331	7.84451	1.11652e-10	4.72238e-07	1.11652e-10	0.001	0.0022525
chr8:42440532_rs2974300	SMIM19	0.147511	7.84034	1.13467e-10	4.49159e-07	1.13467e-10	0.001	0.0022525
chr19:36240614_rs7260184	KMT2B	-0.309342	-7.83728	1.14817e-10	9.31701e-07	1.14817e-10	0.001	0.0022525
chr1:44453025_rs72683973	IPO13	-0.304851	-7.82704	1.19453e-10	2.68466e-07	1.19453e-10	0.001	0.0022525
chr3:33152154_rs55737965	CRTAP	-0.146574	-7.82433	1.20711e-10	2.3501e-07	1.20711e-10	0.001	0.0022525
chr16:20955560_rs3103821	ERI2	0.228815	7.81412	1.2557e-10	5.71454e-07	1.2557e-10	0.001	0.0022525
chr3:113779363_rs140657739	QTRTD1	-0.364922	-7.8026	1.31285e-10	2.52223e-07	1.31285e-10	0.001	0.0022525
chr17:6917850_rs3180517	RNASEK-C17orf49	0.122623	7.80165	1.31769e-10	2.94029e-07	1.31769e-10	0.001	0.0022525
chr7:128762797_rs1835489	TSPAN33	0.388894	7.78429	1.40914e-10	2.27247e-07	1.40914e-10	0.001	0.0022525
chr1:154436384_rs4509570	IL6R	-0.149984	-7.78286	1.41698e-10	3.11795e-07	1.41698e-10	0.001	0.0022525
chr20:37440046_rs6101301	PPP1R16B	-0.315243	-7.77779	1.44502e-10	3.20089e-07	1.44502e-10	0.001	0.0022525
chr12:102489302_rs11111162	CCDC53	0.168444	7.77632	1.45323e-10	4.2822e-07	1.45323e-10	0.001	0.0022525
chr1:40559478_rs4660385	PPT1	-0.239791	-7.76961	1.49141e-10	3.24453e-07	1.49141e-10	0.001	0.0022525
chr16:2011126_rs758335	TCRBV20S1	0.114797	7.76873	1.49652e-10	6.67526e-07	1.49652e-10	0.001	0.0022525
chr11:118894287_rs569	CCDC84	-0.323067	-7.76574	1.51395e-10	4.57526e-07	1.51395e-10	0.001	0.0022525
chr20:48887268_rs17196752	AK307192	0.618061	7.76023	1.54649e-10	3.41572e-07	1.54649e-10	0.001	0.0022525
chr5:131599370_rs932019	PDLIM4	0.442513	7.7561	1.5714e-10	4.28255e-07	1.5714e-10	0.001	0.0022525
chr5:49581349_rs79332394	EMB	-0.18286	-7.73915	1.67785e-10	4.52062e-07	1.67785e-10	0.001	0.0022525
chr11:57352562_rs2649662	TIMM10	0.2225	7.72392	1.77965e-10	5.30409e-07	1.77965e-10	0.001	0.0022525
chr12:93767568_rs11107000	NUDT4	-0.226712	-7.71634	1.83257e-10	5.2628e-07	1.83257e-10	0.001	0.0022525
chr1:45477675_rs2236576	UROD	0.17518	7.70276	1.93144e-10	3.96816e-07	1.93144e-10	0.001	0.0022525
chr19:17415125_rs7250482	MRPL34	-0.135663	-7.69257	2.00906e-10	1.50164e-06	2.00906e-10	0.001	0.0022525
chr19:58310330_rs8104937	ZNF814	0.171575	7.68758	2.04822e-10	1.51938e-06	2.04822e-10	0.001	0.0022525
chr15:75131661_rs4886615	ULK3	0.205153	7.67963	2.11217e-10	5.82155e-07	2.11217e-10	0.001	0.0022525
chr9:17264074_rs10810741	CNTLN	-0.225108	-7.67702	2.13363e-10	8.21665e-07	2.13363e-10	0.001	0.0022525
chr16:4590910_rs12917680	CDIP1	0.233123	7.66983	2.19381e-10	9.4118e-07	2.19381e-10	0.001	0.0022525
chr16:58754094_rs190473	GOT2	0.116324	7.66888	2.20187e-10	9.43e-07	2.20187e-10	0.001	0.0022525
chr2:44141849_rs11900511	LRPPRC	-0.103959	-7.6649	2.23606e-10	8.22137e-07	2.23606e-10	0.001	0.0022525
chr6:151845023_rs1384123	C6orf211	0.140238	7.65746	2.30137e-10	2.15592e-07	2.30137e-10	0.001	0.0022525
chr11:10464659_rs9971562	AMPD3	-0.241714	-7.65319	2.33973e-10	6.81602e-07	2.33973e-10	0.001	0.0022525
chr4:103607806_rs227285	MANBA	0.136418	7.65187	2.35166e-10	6.24244e-07	2.35166e-10	0.001	0.0022525
chr22:25855629_rs6004655	CRYBB2P1	-0.70265	-7.65086	2.36084e-10	9.44413e-07	2.36084e-10	0.001	0.0022525
chr13:111312483_rs2986328	CARS2	0.199543	7.64695	2.39688e-10	1.19884e-06	2.39688e-10	0.001	0.0022525
chr12:117525235_rs2173650	TESC	-0.540359	-7.64448	2.41988e-10	6.63054e-07	2.41988e-10	0.001	0.0022525
chr9:33291520_rs830575	NFX1	0.0821588	7.63372	2.52276e-10	9.51661e-07	2.52276e-10	0.001	0.0022525
chr14:92623349_rs36036195	CPSF2	0.0906786	7.62947	2.5646e-10	6.51923e-07	2.5646e-10	0.001	0.0022525
chr6:32613487_rs4529332	HLA-DQB2	1.50293	7.62784	2.58084e-10	2.40149e-07	2.58084e-10	0.001	0.0022525
chr8:580776_rs71514174	ERICH1	0.602812	7.62619	2.59727e-10	8.93595e-07	2.59727e-10	0.001	0.0022525
chr9:15298666_rs675849	TTC39B	0.588161	7.61024	2.76269e-10	1.02986e-06	2.76269e-10	0.001	0.0022525
chr7:90955960_rs1429535	FZD1	-0.273861	-7.60913	2.77461e-10	4.13049e-07	2.77461e-10	0.001	0.0022525
chr15:40709579_rs7172000	IVD	0.177239	7.60751	2.79206e-10	7.4149e-07	2.79206e-10	0.001	0.0022525
chr20:1460272_rs2873565	SIRPB2	0.743872	7.59054	2.9815e-10	6.3997e-07	2.9815e-10	0.001	0.0022525
chr1:205898828_rs11240595	SLC26A9	1.17	7.58869	3.00296e-10	5.88752e-07	3.00296e-10	0.001	0.0022525
chr17:18712672_rs2654273	TVP23B	0.361854	7.58359	3.06276e-10	6.43069e-07	3.06276e-10	0.001	0.0022525
chr9:95863862_rs4744172	C9orf89	-0.166968	-7.58279	3.07225e-10	1.13398e-06	3.07225e-10	0.001	0.0022525
chr3:126739012_rs891762	PLXNA1	-0.242743	-7.55905	3.36797e-10	5.92331e-07	3.36797e-10	0.001	0.0022525
chr12:129291496_rs12369838	SLC15A4	-0.0957156	-7.55641	3.40252e-10	8.86992e-07	3.40252e-10	0.001	0.0022525
chr1:241804070_rs584695	OPN3	-0.191173	-7.55623	3.40485e-10	6.58632e-07	3.40485e-10	0.001	0.0022525
chr9:75164607_rs9777243	ZFAND5	-0.148296	-7.55513	3.41945e-10	1.24113e-06	3.41945e-10	0.001	0.0022525
chr18:33759017_rs483583	MOCOS	0.244834	7.54725	3.52527e-10	9.2208e-07	3.52527e-10	0.001	0.0022525
chr13:50048975_rs2038638	SETDB2	-0.155667	-7.54647	3.53604e-10	1.65148e-06	3.53604e-10	0.001	0.0022525
chr1:225999979_rs6426089	EPHX1	0.2279	7.54251	3.59059e-10	6.91069e-07	3.59059e-10	0.001	0.0022525
chr16:66637281_rs8046678	TK2	-0.140432	-7.53755	3.66024e-10	1.44719e-06	3.66024e-10	0.001	0.0022525
chr1:38465315_rs4634868	FHL3	-0.232307	-7.53262	3.73073e-10	7.13431e-07	3.73073e-10	0.001	0.0022525
chr7:2776903_rs1724917	GNA12	-0.246622	-7.53201	3.7395e-10	5.42178e-07	3.7395e-10	0.001	0.0022525
chr2:190581557_rs7603192	ORMDL1	-0.147122	-7.51988	3.91926e-10	1.28487e-06	3.91926e-10	0.001	0.0022525
chr3:184427787_rs4444691	MAGEF1	0.294228	7.51793	3.94899e-10	6.86598e-07	3.94899e-10	0.001	0.0022525
chr5:141309824_rs351260	KIAA0141	0.146435	7.50973	4.07632e-10	9.55071e-07	4.07632e-10	0.001	0.0022525
chr6:74314498_rs34866243	SLC17A5	-0.193162	-7.49645	4.29129e-10	3.87391e-07	4.29129e-10	0.001	0.0022525
chr6:139463189_rs2327922	HECA	0.12951	7.4906	4.38962e-10	3.95673e-07	4.38962e-10	0.001	0.0022525
chr5:156887133_rs1105282	NIPAL4	1.41483	7.48429	4.49823e-10	1.0353e-06	4.49823e-10	0.001	0.0022525
chr21:38444890_rs2298682	TTC3	-0.107784	-7.47595	4.64569e-10	1.19187e-06	4.64569e-10	0.001	0.0022525
chr15:90467792_rs1699487	C15orf38-AP3S2	-0.25262	-7.47086	4.73826e-10	1.15708e-06	4.73826e-10	0.001	0.0022525
chr13:114463834_rs7328385	TMEM255B	0.474197	7.46968	4.75997e-10	2.0494e-06	4.75997e-10	0.001	0.0022525
chr11:65649984_rs687672	FIBP	0.0929255	7.46311	4.88246e-10	1.17784e-06	4.88246e-10	0.001	0.0022525
chr5:81570394_rs226203	RPS23	-0.119022	-7.45823	4.97554e-10	1.12822e-06	4.97554e-10	0.001	0.0022525
chr7:150755205_rs2069442	SLC4A2	0.106461	7.45572	5.02425e-10	7.10272e-07	5.02425e-10	0.001	0.0022525
chr1:75200697_rs3806160	CRYZ	0.365671	7.44772	5.18223e-10	9.67867e-07	5.18223e-10	0.001	0.0022525
chr17:5326162_rs2189336	RABEP1	-0.0945951	-7.44556	5.22581e-10	1.07271e-06	5.22581e-10	0.001	0.0022525
chr15:68570166_rs55941639	FEM1B	0.0599718	7.43316	5.48279e-10	1.33362e-06	5.48279e-10	0.001	0.0022525
chr9:108456726_rs2271248	TMEM38B	-0.224081	-7.42035	5.76156e-10	1.87558e-06	5.76156e-10	0.001	0.0022525
chr10:90749963_rs1800682	ACTA2	0.476553	7.41848	5.80332e-10	9.8759e-07	5.80332e-10	0.001	0.0022525
chr1:99127205_rs12723363	SNX7	3.45753	7.40901	6.0201e-10	1.11157e-06	6.0201e-10	0.001	0.0022525
chr6:7308047_rs2842370	SSR1	0.0796544	7.39941	6.24797e-10	5.43583e-07	6.24797e-10	0.001	0.0022525
chr19:866857_rs111969541	CFD	-0.543232	-7.3912	6.4499e-10	3.75527e-06	6.4499e-10	0.001	0.0022525
chr7:95980767_rs11769319	SLC25A13	0.167399	7.38953	6.49174e-10	9.00257e-07	6.49174e-10	0.001	0.0022525
chr2:152146194_rs2194492	NMI	0.119251	7.37913	6.75833e-10	2.04995e-06	6.75833e-10	0.001	0.0022525
chr17:35875629_rs58781505	SYNRG	-0.0898792	-7.37268	6.92909e-10	1.37788e-06	6.92909e-10	0.001	0.0022525
chr7:22852499_rs2240728	TOMM7	0.101718	7.3709	6.97718e-10	9.58453e-07	6.97718e-10	0.001	0.0022525
chr5:139731232_rs6879217	SRA1	-0.104517	-7.36943	7.01697e-10	1.50469e-06	7.01697e-10	0.001	0.0022525
chr17:80385793_rs4789772	HEXDC	-0.225168	-7.36439	7.15519e-10	1.41857e-06	7.15519e-10	0.001	0.0022525
chr2:216208235_rs13029082	ATIC	-0.16898	-7.36343	7.18178e-10	2.14144e-06	7.18178e-10	0.001	0.0022525
chr11:118958127_rs1799993	HMBS	-0.160709	-7.3623	7.21343e-10	1.64315e-06	7.21343e-10	0.001	0.0022525
chr6:32816054_rs735883	TAP2	0.204544	7.36076	7.25645e-10	6.16862e-07	7.25645e-10	0.001	0.0022525
chr19:39684764_rs58016205	NCCRP1	-1.0798	-7.35967	7.28715e-10	4.17367e-06	7.28715e-10	0.001	0.0022525
chr6:36884681_rs12202755	C6orf89	-0.0972349	-7.354	7.44899e-10	6.31887e-07	7.44899e-10	0.001	0.0022525
chr2:75185856_rs12366	POLE4	-0.247727	-7.35283	7.48277e-10	2.21331e-06	7.48277e-10	0.001	0.0022525
chr19:13020541_rs7409457	FARSA	0.0961426	7.35258	7.48995e-10	4.27491e-06	7.48995e-10	0.001	0.0022525
chr2:127863029_rs7583814	BIN1	0.655027	7.34692	7.65575e-10	2.25724e-06	7.65575e-10	0.001	0.0022525
chr4:9923839_rs62293333	SLC2A9	-0.263921	-7.34162	7.81473e-10	1.58301e-06	7.81473e-10	0.001	0.0022525
chr8:8999187_rs330924	PPP1R3B	0.554839	7.34069	7.84273e-10	2.31336e-06	7.84273e-10	0.001	0.0022525
chr14:23285439_rs1951568	SLC7A7	0.173672	7.34043	7.85063e-10	1.78974e-06	7.85063e-10	0.001	0.0022525
chr3:57968393_rs7637505	FLNB	0.482835	7.33144	8.1287e-10	1.30231e-06	8.1287e-10	0.001	0.0022525
chr7:158706650_rs2527210	WDR60	-0.265772	-7.32231	8.4213e-10	1.14247e-06	8.4213e-10	0.001	0.0022525
chr6:26415062_rs12213625	BTN3A1	-0.20065	-7.31903	8.52892e-10	7.1341e-07	8.52892e-10	0.001	0.0022525
chr10:73576307_rs7869	PSAP	-0.138298	-7.31363	8.70889e-10	1.38299e-06	8.70889e-10	0.001	0.0022525
chr3:71829467_rs7634474	EIF4E3	0.363985	7.30928	8.85674e-10	1.40629e-06	8.85674e-10	0.001	0.0022525
chr12:93863162_rs4761721	MRPL42	-0.12691	-7.30492	9.00754e-10	2.13532e-06	9.00754e-10	0.001	0.0022525
chr19:49377319_rs610308	PPP1R15A	-0.149815	-7.29513	9.35561e-10	5.12591e-06	9.35561e-10	0.001	0.0022525
chr20:5061017_rs78138964	TMEM230	-0.0996923	-7.29482	9.36665e-10	1.78211e-06	9.36665e-10	0.001	0.0022525
chr16:103423_rs2541593	POLR3K	-0.188364	-7.29235	9.45675e-10	3.18812e-06	9.45675e-10	0.001	0.0022525
chr12:28397175_rs11049476	CCDC91	-0.114416	-7.28478	9.73796e-10	2.26997e-06	9.73796e-10	0.001	0.0022525
chr12:40540411_rs183792546	LRRK2	-1.00421	-7.28351	9.78599e-10	2.27721e-06	9.78599e-10	0.001	0.0022525
chr1:9713500_rs4240896	PIK3CD	-0.224514	-7.28117	9.8752e-10	1.74926e-06	9.8752e-10	0.001	0.0022525
chr11:77845415_rs472169	ALG8	-0.157534	-7.27898	9.9593e-10	2.1958e-06	9.9593e-10	0.001	0.0022525
chr10:74125582_rs9416019	DNAJB12	0.0993851	7.27484	1.012e-09	1.58219e-06	1.012e-09	0.001	0.0022525
chr2:172379781_rs960749	CYBRD1	-0.263043	-7.27024	1.03019e-09	2.95026e-06	1.03019e-09	0.001	0.0022525
chr3:56618207_rs113740976	FAM208A	-0.0796525	-7.26978	1.03202e-09	1.61386e-06	1.03202e-09	0.001	0.0022525
chr6:111283167_rs9372276	GTF3C6	0.166044	7.26692	1.04351e-09	8.41949e-07	1.04351e-09	0.001	0.0022525
chr17:34313915_rs9892586	CCL15-CCL14	-0.930973	-7.26152	1.06557e-09	2.02866e-06	1.06557e-09	0.001	0.0022525
chr19:46320718_rs77756656	SYMPK	0.212519	7.26013	1.0713e-09	5.71702e-06	1.0713e-09	0.001	0.0022525
chr19:39310826_rs4328569	ECH1	-0.101054	-7.24928	1.11724e-09	5.91094e-06	1.11724e-09	0.001	0.0022525
chr14:50095335_rs3007042	NEMF	-0.0885568	-7.2308	1.20011e-09	2.62293e-06	1.20011e-09	0.001	0.0022525
chr11:44140676_rs12421892	EXT2	0.114912	7.22749	1.21559e-09	2.60882e-06	1.21559e-09	0.001	0.0022525
chr9:21031152_rs13284810	PTPLAD2	-0.212602	-7.21974	1.25259e-09	3.48224e-06	1.25259e-09	0.001	0.0022525
chr15:91037300_rs1978151	IQGAP1	-0.0761576	-7.21686	1.26663e-09	2.87324e-06	1.26663e-09	0.001	0.0022525
chr6:25139464_rs303016	CMAHP	-0.285532	-7.21292	1.28609e-09	1.02209e-06	1.28609e-09	0.001	0.0022525
chr10:3217751_rs4881119	PITRM1	-0.244328	-7.2059	1.32152e-09	2.02944e-06	1.32152e-09	0.001	0.0022525
chr6:32628342_rs9273500	HLA-DQB1	1.02814	7.20212	1.34099e-09	1.06174e-06	1.34099e-09	0.001	0.0022525
chr7:128575552_rs3778754	IRF5	-0.116914	-7.19856	1.35961e-09	1.755e-06	1.35961e-09	0.001	0.0022525
chr19:49896752_rs11083972	CD37	0.379137	7.19835	1.36073e-09	6.86492e-06	1.36073e-09	0.001	0.0022525
chr19:12876964_rs897804	PRDX2	-0.273815	-7.19072	1.40151e-09	6.91255e-06	1.40151e-09	0.001	0.0022525
chr11:34934308_rs2956117	PDHX	0.120235	7.1894	1.4087e-09	2.85857e-06	1.4087e-09	0.001	0.0022525
chr14:105629947_rs3784239	NUDT14	-0.31076	-7.17478	1.49071e-09	3.17523e-06	1.49071e-09	0.001	0.0022525
chr2:153222924_rs12618892	FMNL2	-0.215329	-7.1698	1.51967e-09	4.11878e-06	1.51967e-09	0.001	0.0022525
chr5:179126632_rs13182141	CANX	0.0683486	7.16786	1.53112e-09	2.79132e-06	1.53112e-09	0.001	0.0022525
chr5:35851261_rs12516866	IL7R	-0.496544	-7.16305	1.55993e-09	2.83418e-06	1.55993e-09	0.001	0.0022525
chr7:34991676_rs1649225	DPY19L1	0.168063	7.15944	1.58189e-09	2.02315e-06	1.58189e-09	0.001	0.0022525
chr1:36178868_rs12562583	C1orf216	0.185193	7.15532	1.60727e-09	2.73367e-06	1.60727e-09	0.001	0.0022525
chr1:58973464_rs10889098	TACSTD2	-0.844724	-7.1518	1.62932e-09	2.76726e-06	1.62932e-09	0.001	0.0022525
chr16:88918727_rs4536457	GALNS	0.254828	7.1495	1.64387e-09	5.22808e-06	1.64387e-09	0.001	0.0022525
chr1:19549759_rs710870	EMC1	0.0888977	7.14771	1.65533e-09	2.80788e-06	1.65533e-09	0.001	0.0022525
chr19:14614403_rs10401423	DNAJB1	-0.124027	-7.14547	1.66974e-09	7.92159e-06	1.66974e-09	0.001	0.0022525
chr1:156309372_rs2296375	CCT3	-0.0988904	-7.1417	1.69429e-09	2.86761e-06	1.69429e-09	0.001	0.0022525
chr1:182541031_rs115886573	RNASEL	-0.183893	-7.12731	1.79132e-09	2.99963e-06	1.79132e-09	0.001	0.0022525
chr2:136558157_rs748841	MCM6	0.127298	7.10619	1.9438e-09	5.04954e-06	1.9438e-09	0.001	0.0022525
chr1:161624560_rs1256294	FCGR2C	-1.41025	-7.10377	1.96214e-09	3.23713e-06	1.96214e-09	0.001	0.0022525
chr12:39073964_rs9645814	CPNE8	0.202712	7.1023	1.97332e-09	4.24832e-06	1.97332e-09	0.001	0.0022525
chr5:1104938_rs35188965	SLC12A7	0.302042	7.09494	2.03029e-09	3.45506e-06	2.03029e-09	0.001	0.0022525
chr15:75860861_rs7162532	SIN3A	-0.0968453	-7.08756	2.08909e-09	4.53168e-06	2.08909e-09	0.001	0.0022525
chr17:61851588_rs9913551	STRADA	0.103539	7.08698	2.09376e-09	3.69474e-06	2.09376e-09	0.001	0.0022525
chr1:203155882_rs4950928	CHI3L1	-1.58134	-7.07739	2.17295e-09	3.52526e-06	2.17295e-09	0.001	0.0022525
chr22:51020668_rs86337	CHKB-CPT1B	-0.141916	-7.06998	2.23615e-09	6.19292e-06	2.23615e-09	0.001	0.0022525
chr12:30791864_rs10771746	IPO8	0.0978485	7.06853	2.24869e-09	4.77619e-06	2.24869e-09	0.001	0.0022525
chr7:6073644_rs62456200	EIF2AK1	-0.104627	-7.06604	2.27044e-09	2.77387e-06	2.27044e-09	0.001	0.0022525
chr14:104167545_rs709399	KLC1	-0.0592938	-7.06121	2.31327e-09	4.7222e-06	2.31327e-09	0.001	0.0022525
chr10:61693851_rs2440918	CCDC6	-0.105051	-7.05944	2.32918e-09	3.27778e-06	2.32918e-09	0.001	0.0022525
chr15:59984780_rs7183832	BNIP2	0.0894604	7.05842	2.33838e-09	4.96378e-06	2.33838e-09	0.001	0.0022525
chr15:76777614_rs2461872	SCAPER	-0.189136	-7.05314	2.38659e-09	5.04299e-06	2.38659e-09	0.001	0.0022525
chr21:46294986_rs235374	PTTG1IP	-0.0993108	-7.05063	2.40989e-09	3.98374e-06	2.40989e-09	0.001	0.0022525
chr6:46114914_rs7766857	ENPP4	0.614153	7.04665	2.44734e-09	1.81927e-06	2.44734e-09	0.001	0.0022525
chr10:120920588_rs10749291	SFXN4	-0.144473	-7.04518	2.46126e-09	3.45163e-06	2.46126e-09	0.001	0.0022525
chr9:130565267_rs10760502	FPGS	0.127641	7.03878	2.52298e-09	6.39184e-06	2.52298e-09	0.001	0.0022525
chr11:9287095_rs61877916	TMEM41B	0.11761	7.03622	2.54803e-09	4.67302e-06	2.54803e-09	0.001	0.0022525
chr1:101133985_rs9433740	VCAM1	-1.63434	-7.03458	2.56423e-09	3.97939e-06	2.56423e-09	0.001	0.0022525
chr12:7049999_rs2071076	C12orf57	0.227533	7.01431	2.77337e-09	5.80872e-06	2.77337e-09	0.001	0.0022525
chr2:25880344_rs12478242	DTNB	0.203179	7.01059	2.81354e-09	6.88271e-06	2.81354e-09	0.001	0.0022525
chr12:22700848_rs11613436	C2CD5	-0.142942	-7.00877	2.83338e-09	5.87608e-06	2.83338e-09	0.001	0.0022525
chr22:42905495_rs6002775	RRP7B	-0.783045	-7.00514	2.87349e-09	7.73219e-06	2.87349e-09	0.001	0.0022525
chr12:21591785_rs2417979	PYROXD1	0.20511	7.00305	2.89677e-09	5.98794e-06	2.89677e-09	0.001	0.0022525
chr4:166205834_rs72701606	KLHL2	-0.103128	-6.99738	2.96093e-09	4.88806e-06	2.96093e-09	0.001	0.0022525
chr19:59058693_rs3816329	UBE2M	-0.105845	-6.99693	2.96609e-09	1.26837e-05	2.96609e-09	0.001	0.0022525
chr11:65477954_rs34007146	RNASEH2C	0.154418	6.98991	3.04781e-09	5.52059e-06	3.04781e-09	0.001	0.0022525
chr20:17629439_rs3790316	DSTN	-0.0706576	-6.98658	3.0873e-09	5.40186e-06	3.0873e-09	0.001	0.0022525
chr6:117697814_rs6568975	DCBLD1	0.902854	6.98402	3.11794e-09	2.2695e-06	3.11794e-09	0.001	0.0022525
chr11:133982074_rs11223695	THYN1	0.18818	6.97701	3.20356e-09	5.77678e-06	3.20356e-09	0.001	0.0022525
chr1:2539400_rs4445406	FAM213B	0.193206	6.97654	3.20943e-09	4.86791e-06	3.20943e-09	0.001	0.0022525
chr20:30228157_rs6088864	HM13	-0.103159	-6.97408	3.24014e-09	5.64337e-06	3.24014e-09	0.001	0.0022525
chr9:132399200_rs1045647	NTMT1	0.146598	6.96841	3.31191e-09	8.08329e-06	3.31191e-09	0.001	0.0022525
chr7:32976416_rs7790246	RP9P	0.3025	6.94382	3.64215e-09	4.16218e-06	3.64215e-09	0.001	0.0022525
chr1:113417881_rs2884871	SLC16A1	0.197125	6.93617	3.75149e-09	5.60913e-06	3.75149e-09	0.001	0.0022525
chr11:57446272_rs1624389	ZDHHC5	-0.0550798	-6.93072	3.83137e-09	6.79872e-06	3.83137e-09	0.001	0.0022525
chr3:48478039_rs13069724	SHISA5	0.171638	6.93009	3.84066e-09	5.29568e-06	3.84066e-09	0.001	0.0022525
chr1:28514027_rs2989475	DNAJC8	0.111837	6.92263	3.95291e-09	5.88403e-06	3.95291e-09	0.001	0.0022525
chr2:113981022_rs6707386	PAX8	1.00991	6.92147	3.97079e-09	9.2188e-06	3.97079e-09	0.001	0.0022525
chr1:28209305_rs3766398	THEMIS2	0.141653	6.91994	3.99424e-09	5.93567e-06	3.99424e-09	0.001	0.0022525
chr14:35516213_rs799473	FAM177A1	0.154397	6.9178	4.0275e-09	7.34199e-06	4.0275e-09	0.001	0.0022525
chr4:106341530_rs2713825	PPA2	-0.0962238	-6.91765	4.02976e-09	6.45839e-06	4.02976e-09	0.001	0.0022525
chr10:91011681_rs1332327	LIPA	-0.285345	-6.9105	4.1427e-09	5.38289e-06	4.1427e-09	0.001	0.0022525
chr5:150809089_rs11738994	SLC36A1	-0.285197	-6.90932	4.16167e-09	5.77357e-06	4.16167e-09	0.001	0.0022525
chr12:58084706_rs2928061	OS9	-0.0619666	-6.901	4.29763e-09	8.52718e-06	4.29763e-09	0.001	0.0022525
chr3:49631221_rs7632342	GPX1	0.184435	6.89705	4.36373e-09	5.91426e-06	4.36373e-09	0.001	0.0022525
chr10:26707628_rs10828988	APBB1IP	-0.212435	-6.89687	4.36673e-09	5.64974e-06	4.36673e-09	0.001	0.0022525
chr7:97610497_rs10269165	MGC72080	0.26028	6.89137	4.46042e-09	4.984e-06	4.46042e-09	0.001	0.0022525
chr6:24730730_rs9467269	C6orf62	0.127416	6.89134	4.46096e-09	3.08728e-06	4.46096e-09	0.001	0.0022525
chr7:38398998_rs62445013	Y00482	1.64201	6.8898	4.4876e-09	5.0086e-06	4.4876e-09	0.001	0.0022525
chr17:4812470_rs9905341	SLC25A11	-0.0714533	-6.88273	4.6118e-09	7.67536e-06	4.6118e-09	0.001	0.0022525
chr18:56827121_rs8091691	SEC11C	0.121774	6.88247	4.61644e-09	1.00577e-05	4.61644e-09	0.001	0.0022525
chr8:133843467_rs6989647	TMEM71	0.425899	6.87768	4.70266e-09	1.12471e-05	4.70266e-09	0.001	0.0022525
chr11:7542298_rs4078258	PPFIBP2	0.112847	6.87673	4.72006e-09	8.08407e-06	4.72006e-09	0.001	0.0022525
chr15:45474371_rs753414	SHF	-0.399881	-6.86992	4.84579e-09	8.80451e-06	4.84579e-09	0.001	0.0022525
chr10:114135013_rs2419621	ACSL5	-0.201462	-6.86465	4.94547e-09	6.34097e-06	4.94547e-09	0.001	0.0022525
chr2:119728876_rs2278589	MARCO	0.915922	6.86449	4.94856e-09	1.08941e-05	4.94856e-09	0.001	0.0022525
chr5:10260576_rs6881320	CCT5	-0.0783829	-6.86395	4.95877e-09	6.51514e-06	4.95877e-09	0.001	0.0022525
chr1:903426_rs6696609	NOC2L	0.156818	6.86071	5.02132e-09	7.18763e-06	5.02132e-09	0.001	0.0022525
chr1:93555682_rs11164871	DR1	0.0809343	6.86002	5.03467e-09	7.20033e-06	5.03467e-09	0.001	0.0022525
chr9:132594938_rs34862553	C9orf78	-0.11616	-6.85618	5.1099e-09	1.15439e-05	5.1099e-09	0.001	0.0022525
chr8:72754748_rs3779761	MSC	-0.27107	-6.85107	5.21165e-09	1.2305e-05	5.21165e-09	0.001	0.0022525
chr18:72178410_rs8088885	CNDP2	-0.171375	-6.84068	5.42504e-09	1.16819e-05	5.42504e-09	0.001	0.0022525
chr3:111486405_rs9868171	ABHD10	-0.159526	-6.83471	5.55159e-09	7.15478e-06	5.55159e-09	0.001	0.0022525
chr2:242375429_rs62190366	HDLBP	0.0704959	6.8332	5.58419e-09	1.2076e-05	5.58419e-09	0.001	0.0022525
chr3:67457577_rs62256379	SUCLG2	-0.152772	-6.82625	5.73593e-09	7.38048e-06	5.73593e-09	0.001	0.0022525
chr19:18699445_rs10407212	C19orf60	0.23233	6.81663	5.95296e-09	2.11253e-05	5.95296e-09	0.001	0.0022525
chr18:33688370_rs3826603	SLC39A6	0.153433	6.81634	5.9597e-09	1.27443e-05	5.9597e-09	0.001	0.0022525
chr7:44140670_rs2537193	AEBP1	-0.719304	-6.8047	6.23349e-09	6.76468e-06	6.23349e-09	0.001	0.0022525
chr22:38183372_rs11703775	TRIOBP	0.112003	6.8027	6.28198e-09	1.60432e-05	6.28198e-09	0.001	0.0022525
chr1:183592416_rs2761573	ARPC5	-0.0624629	-6.80207	6.2971e-09	8.80609e-06	6.2971e-09	0.001	0.0022525
chr16:66729193_rs34213783	CMTM3	0.227109	6.79823	6.39123e-09	1.68555e-05	6.39123e-09	0.001	0.0022525
chr21:34696077_rs143304042	IFNAR1	0.154283	6.79744	6.41065e-09	8.54494e-06	6.41065e-09	0.001	0.0022525
chr13:111925387_rs3825461	ARHGEF7	-0.072243	-6.7961	6.44408e-09	1.82365e-05	6.44408e-09	0.001	0.0022525
chr10:105205302_rs7831	CALHM2	-0.236197	-6.79433	6.48822e-09	8.01786e-06	6.48822e-09	0.001	0.0022525
chr11:6342018_rs1812173	PRKCDBP	1.17617	6.79111	6.56928e-09	1.07201e-05	6.56928e-09	0.001	0.0022525
chr13:100107940_rs11069365	TM9SF2	-0.0619356	-6.79008	6.59546e-09	1.84649e-05	6.59546e-09	0.001	0.0022525
chr11:77823557_rs624350	NDUFC2-KCTD14	-0.1178	-6.78964	6.6066e-09	1.07701e-05	6.6066e-09	0.001	0.0022525
chr2:11924950_rs3795974	LPIN1	-0.14177	-6.78357	6.76328e-09	1.40417e-05	6.76328e-09	0.001	0.0022525
chr19:48686627_rs79494056	CARD8	0.360413	6.78261	6.78824e-09	2.33492e-05	6.78824e-09	0.001	0.0022525
chr2:85812746_rs55971080	GGCX	-0.0990194	-6.77822	6.90423e-09	1.42942e-05	6.90423e-09	0.001	0.0022525
chr22:19864335_rs7287073	TXNRD2	0.230038	6.774	7.0176e-09	1.75573e-05	7.0176e-09	0.001	0.0022525
chr11:13623972_rs73424752	BTBD10	0.114365	6.76806	7.18022e-09	1.1565e-05	7.18022e-09	0.001	0.0022525
chr20:36325944_rs73290822	CTNNBL1	0.237285	6.76597	7.23852e-09	1.18874e-05	7.23852e-09	0.001	0.0022525
chr2:61404931_rs2600667	AHSA2	0.196422	6.76579	7.24348e-09	1.48302e-05	7.24348e-09	0.001	0.0022525
chr9:5383460_rs2104175	PLGRKT	0.161653	6.76491	7.2682e-09	1.51896e-05	7.2682e-09	0.001	0.0022525
chr5:176957126_rs1477296	DOK3	-0.237819	-6.75628	7.51437e-09	8.72453e-06	7.51437e-09	0.001	0.0022525
chr10:124916409_rs112323868	BUB3	-0.131751	-6.75616	7.51779e-09	9.17615e-06	7.51779e-09	0.001	0.0022525
chr1:26884416_rs12726439	RPS6KA1	-0.0905342	-6.75183	7.64424e-09	1.04714e-05	7.64424e-09	0.001	0.0022525
chr1:245133662_rs61844237	EFCAB2	0.595594	6.74357	7.89187e-09	1.07447e-05	7.89187e-09	0.001	0.0022525
chr10:30052470_rs1013609	SVIL	0.216234	6.74064	7.98164e-09	9.65172e-06	7.98164e-09	0.001	0.0022525
chr2:113934451_rs4848316	PSD4	-0.169932	-6.73949	8.01694e-09	1.60227e-05	8.01694e-09	0.001	0.0022525
chr2:223713272_rs7349246	ACSL3	-0.141783	-6.739	8.03225e-09	1.60416e-05	8.03225e-09	0.001	0.0022525
chr7:66192739_rs73137978	KCTD7	0.578361	6.73657	8.10773e-09	8.62425e-06	8.10773e-09	0.001	0.0022525
chr3:136004925_rs1153877	PCCB	-0.116945	-6.73516	8.15207e-09	1.00764e-05	8.15207e-09	0.001	0.0022525
chr13:37653007_rs1764494	SUPT20H	-0.169688	-6.73348	8.20494e-09	2.20688e-05	8.20494e-09	0.001	0.0022525
chr11:125461497_rs545673	STT3A	-0.106937	-6.73274	8.22854e-09	1.3058e-05	8.22854e-09	0.001	0.0022525
chr6:29691090_rs1362125	HLA-F	0.30408	6.73146	8.26925e-09	5.27002e-06	8.26925e-09	0.001	0.0022525
chr19:54965527_rs7247170	LENG8	0.0718003	6.7275	8.39635e-09	2.71549e-05	8.39635e-09	0.001	0.0022525
chr1:31224193_rs7549164	LAPTM5	-0.152951	-6.72684	8.41795e-09	1.13429e-05	8.41795e-09	0.001	0.0022525
chr1:1510801_rs7519837	SSU72	-0.0912637	-6.72653	8.4279e-09	1.13534e-05	8.4279e-09	0.001	0.0022525
chr1:10462088_rs2847341	KIF1B	-0.216385	-6.72465	8.48912e-09	1.14215e-05	8.48912e-09	0.001	0.0022525
chr3:69060854_rs9878605	EOGT	0.146364	6.72448	8.49481e-09	1.04677e-05	8.49481e-09	0.001	0.0022525
chr4:185258706_rs6853186	IRF2	-0.104754	-6.71866	8.68745e-09	1.29961e-05	8.68745e-09	0.001	0.0022525
chr12:42743598_rs4359266	ZCRB1	-0.10815	-6.71708	8.74059e-09	1.50992e-05	8.74059e-09	0.001	0.0022525
chr3:158364333_rs56075263	GFM1	0.0972577	6.71202	8.91277e-09	1.09533e-05	8.91277e-09	0.001	0.0022525
chr8:97755721_rs189313326	SDC2	-0.233027	-6.70582	9.12859e-09	2.00629e-05	9.12859e-09	0.001	0.0022525
chr16:89602285_rs677939	SPG7	0.225007	6.70557	9.13751e-09	2.33264e-05	9.13751e-09	0.001	0.0022525
chr11:60145822_rs2233239	MS4A14	-0.547946	-6.70299	9.22865e-09	1.44673e-05	9.22865e-09	0.001	0.0022525
chr20:18592900_rs6045505	SEC23B	0.112619	6.69624	9.47211e-09	1.53405e-05	9.47211e-09	0.001	0.0022525
chr9:35767753_rs10758321	GBA2	-0.0945398	-6.68671	9.82654e-09	1.92454e-05	9.82654e-09	0.001	0.0022525
chr1:93639596_rs12044657	TMED5	-0.0785074	-6.683	9.96801e-09	1.30128e-05	9.96801e-09	0.001	0.0022525
chr9:95749607_rs10283409	FGD3	0.152253	6.68064	1.00591e-08	1.96207e-05	1.00591e-08	0.001	0.0022525
chr1:236371831_rs5873	ERO1LB	0.269784	6.6765	1.02209e-08	1.31321e-05	1.02209e-08	0.001	0.0022525
chr22:50959796_rs56228847	TYMP	-0.40379	-6.66615	1.06368e-08	2.52024e-05	1.06368e-08	0.001	0.0022525
chr13:48748878_rs73485008	ITM2B	-0.126465	-6.66318	1.07592e-08	2.67364e-05	1.07592e-08	0.001	0.0022525
chr5:272931_rs11741764	PDCD6	-0.231695	-6.65586	1.10668e-08	1.22904e-05	1.10668e-08	0.001	0.0022525
chr3:182814824_rs4859276	MCCC1	-0.206009	-6.64049	1.17421e-08	1.40529e-05	1.17421e-08	0.001	0.0022525
chr12:110955884_rs6606688	VPS29	0.0861741	6.63166	1.21481e-08	2.03632e-05	1.21481e-08	0.001	0.0022525
chr1:90177852_rs10922702	LRRC8C	-0.088948	-6.62844	1.22997e-08	1.53824e-05	1.22997e-08	0.001	0.0022525
chr19:18702497_rs886242	UBA52	0.0680378	6.6252	1.24542e-08	3.76807e-05	1.24542e-08	0.001	0.0022525
chr12:22213301_rs7979140	CMAS	-0.160686	-6.62185	1.2616e-08	2.1025e-05	1.2616e-08	0.001	0.0022525
chr20:60985627_rs2236201	CABLES2	-0.210908	-6.59167	1.41706e-08	2.14885e-05	1.41706e-08	0.001	0.0022525
chr7:120988757_rs2536184	FAM3C	0.187519	6.58366	1.46138e-08	1.43891e-05	1.46138e-08	0.001	0.0022525
chr11:102647552_rs3819099	MMP10	-2.29179	-6.58364	1.46154e-08	2.16901e-05	1.46154e-08	0.001	0.0022525
chr15:65942119_rs55753331	PTPLAD1	-0.108023	-6.58105	1.47617e-08	2.2215e-05	1.47617e-08	0.001	0.0022525
chr9:139514678_rs12350497	NOTCH1	-0.312584	-6.57953	1.4848e-08	2.65843e-05	1.4848e-08	0.001	0.0022525
chr21:37477746_rs1124086	CBR3	0.402121	6.57709	1.49881e-08	1.8061e-05	1.49881e-08	0.001	0.0022525
chr11:18591175_rs34585786	TSG101	0.0682311	6.5766	1.50167e-08	2.21834e-05	1.50167e-08	0.001	0.0022525
chr16:29820480_rs34286592	MVP	0.118584	6.57109	1.53381e-08	3.57235e-05	1.53381e-08	0.001	0.0022525
chr19:38749390_rs112048422	PPP1R14A	-0.416008	-6.56688	1.55888e-08	4.59235e-05	1.55888e-08	0.001	0.0022525
chr4:77040175_rs34067866	NUP54	-0.0961709	-6.56316	1.58134e-08	2.20045e-05	1.58134e-08	0.001	0.0022525
chr3:139393365_rs56711752	NMNAT3	0.221363	6.56226	1.58681e-08	1.84799e-05	1.58681e-08	0.001	0.0022525
chr5:53597285_rs10940375	ARL15	-0.189737	-6.56019	1.59952e-08	1.71873e-05	1.59952e-08	0.001	0.0022525
chr2:113993385_rs7576384	LOC654433	1.12475	6.55995	1.60103e-08	2.81299e-05	1.60103e-08	0.001	0.0022525
chr1:84971833_rs11163985	GNG5	-0.141545	-6.55525	1.63019e-08	1.95048e-05	1.63019e-08	0.001	0.0022525
chr12:26957065_rs12812268	ITPR2	-0.129291	-6.55153	1.65374e-08	2.62075e-05	1.65374e-08	0.001	0.0022525
chr16:53474108_rs9927982	RBL2	-0.0623493	-6.54771	1.67821e-08	3.85059e-05	1.67821e-08	0.001	0.0022525
chr11:66319313_rs10791882	MRPL11	-0.116276	-6.54609	1.68866e-08	2.38749e-05	1.68866e-08	0.001	0.0022525
chr6:109756735_rs6907769	MICAL1	-0.136895	-6.54419	1.70104e-08	1.00097e-05	1.70104e-08	0.001	0.0022525
chr16:84231927_rs12923987	ADAD2	0.624323	6.53056	1.7926e-08	4.07146e-05	1.7926e-08	0.001	0.0022525
chr16:87998149_rs55656417	BANP	0.240528	6.52984	1.79755e-08	4.07895e-05	1.79755e-08	0.001	0.0022525
chr17:15868291_rs2324082	ZSWIM7	0.318431	6.52831	1.80821e-08	2.66948e-05	1.80821e-08	0.001	0.0022525
chr11:77253788_rs72943494	CLNS1A	-0.0754579	-6.52812	1.80951e-08	2.53724e-05	1.80951e-08	0.001	0.0022525
chr17:26674713_rs1053195	VTN	0.927459	6.52479	1.83282e-08	2.7034e-05	1.83282e-08	0.001	0.0022525
chr14:23038231_rs11628014	DAD1	-0.126753	-6.52239	1.84984e-08	2.65362e-05	1.84984e-08	0.001	0.0022525
chr6:34577257_rs11754773	C6orf106	-0.133881	-6.51473	1.90512e-08	1.1136e-05	1.90512e-08	0.001	0.0022525
chr2:28989887_rs6752464	PPP1CB	-0.0619584	-6.5089	1.94828e-08	3.32038e-05	1.94828e-08	0.001	0.0022525
chr16:31131614_rs4527034	PRSS53	0.117099	6.50887	1.94847e-08	4.35289e-05	1.94847e-08	0.001	0.0022525
chr10:34160764_rs17296943	NRP1	0.499817	6.49942	2.02061e-08	2.2482e-05	2.02061e-08	0.001	0.0022525
chr17:17146368_rs1624963	PLD6	-0.101283	-6.49191	2.07976e-08	3.0298e-05	2.07976e-08	0.001	0.0022525
chr5:81785197_rs10053353	VCAN	-1.12369	-6.49003	2.09485e-08	2.18666e-05	2.09485e-08	0.001	0.0022525
chr2:219595001_rs4006668	CYP27A1	-0.503882	-6.4897	2.09749e-08	3.52831e-05	2.09749e-08	0.001	0.0022525
chr2:108905048_rs2305485	SULT1C2	-1.02104	-6.48697	2.11962e-08	3.5576e-05	2.11962e-08	0.001	0.0022525
chr18:9407044_rs9962797	TWSG1	-0.183734	-6.47979	2.17886e-08	4.2834e-05	2.17886e-08	0.001	0.0022525
chr20:42839461_rs731499	OSER1	-0.0903237	-6.47206	2.24459e-08	3.0272e-05	2.24459e-08	0.001	0.0022525
chr9:113023333_rs7035393	TXN	0.223192	6.46872	2.27352e-08	3.77456e-05	2.27352e-08	0.001	0.0022525
chr1:19581934_rs947532	MRTO4	0.0938908	6.46731	2.2859e-08	2.61654e-05	2.2859e-08	0.001	0.0022525
chr7:6056157_rs3779108	CCZ1	-0.41024	-6.46606	2.29685e-08	2.16135e-05	2.29685e-08	0.001	0.0022525
chr14:75489632_rs175057	EIF2B2	0.122374	6.46368	2.31799e-08	3.22327e-05	2.31799e-08	0.001	0.0022525
chr2:9581741_rs7582154	ITGB1BP1	-0.140315	-6.45969	2.35381e-08	3.87207e-05	2.35381e-08	0.001	0.0022525
chr19:53141625_rs657259	ZNF83	0.233983	6.44624	2.47856e-08	6.66414e-05	2.47856e-08	0.001	0.0022525
chr6:106995198_rs1770723	AIM1	-0.185625	-6.43478	2.59001e-08	1.45741e-05	2.59001e-08	0.001	0.0022525
chr11:126278563_rs4937124	ST3GAL4	-0.211071	-6.4285	2.65322e-08	3.51488e-05	2.65322e-08	0.001	0.0022525
chr14:70818258_rs2332363	SYNJ2BP-COX16	-0.0662147	-6.42744	2.66397e-08	3.634e-05	2.66397e-08	0.001	0.0022525
chr1:9958894_rs12043673	CTNNBIP1	0.260656	6.42607	2.67804e-08	2.99184e-05	2.67804e-08	0.001	0.0022525
chr22:17586631_rs4819959	IL17RA	-0.124794	-6.426	2.67875e-08	5.73066e-05	2.67875e-08	0.001	0.0022525
chr10:4956083_rs11594322	AKR1C1	-2.01867	-6.42581	2.68074e-08	2.6337e-05	2.68074e-08	0.001	0.0022525
chr12:19369693_rs10841183	PLEKHA5	0.366428	6.42537	2.68524e-08	3.92e-05	2.68524e-08	0.001	0.0022525
chr18:57062098_rs8088514	LMAN1	-0.13766	-6.42442	2.69508e-08	5.17733e-05	2.69508e-08	0.001	0.0022525
chr22:45622014_rs6007506	KIAA0930	0.100546	6.42301	2.70965e-08	5.78e-05	2.70965e-08	0.001	0.0022525
chr5:50114013_rs1035481	PARP8	-0.185483	-6.41879	2.75396e-08	2.78755e-05	2.75396e-08	0.001	0.0022525
chr6:2876535_rs318429	MGC39372	1.28966	6.41098	2.83771e-08	1.57389e-05	2.83771e-08	0.001	0.0022525
chr10:124142629_rs11200595	PLEKHA1	0.16341	6.40831	2.86698e-08	2.80371e-05	2.86698e-08	0.001	0.0022525
chr16:4853816_rs2290562	ROGDI	-0.149128	-6.40707	2.88065e-08	5.81546e-05	2.88065e-08	0.001	0.0022525
chr1:94392613_rs10874812	GCLM	0.122185	6.40684	2.88319e-08	3.16755e-05	2.88319e-08	0.001	0.0022525
chr6:155635624_rs1334688	TFB1M	0.223074	6.40495	2.90414e-08	1.60628e-05	2.90414e-08	0.001	0.0022525
chr19:41287605_rs17726258	C19orf54	0.45417	6.39334	3.03641e-08	7.66195e-05	3.03641e-08	0.001	0.0022525
chr11:71193753_rs7950697	NADSYN1	-0.220984	-6.38922	3.08473e-08	4.02297e-05	3.08473e-08	0.001	0.0022525
chr19:18302239_rs55990904	MPV17L2	-0.146206	-6.38906	3.08665e-08	7.77279e-05	3.08665e-08	0.001	0.0022525
chr15:78598931_rs12593776	WDR61	0.17519	6.38845	3.09387e-08	4.17714e-05	3.09387e-08	0.001	0.0022525
chr1:26501245_rs2802345	ZNF593	0.214641	6.38814	3.09759e-08	3.37961e-05	3.09759e-08	0.001	0.0022525
chr19:51642784_rs12983058	SIGLEC7	-0.240879	-6.38812	3.09773e-08	7.78586e-05	3.09773e-08	0.001	0.0022525
chr6:31192796_rs114972609	HLA-C	0.461075	6.38781	3.10145e-08	1.70389e-05	3.10145e-08	0.001	0.0022525
chr3:46240826_rs34611049	CCR5	0.280692	6.38293	3.16003e-08	3.33016e-05	3.16003e-08	0.001	0.0022525
chr8:144643169_rs1545536	GSDMD	-0.182978	-6.37869	3.21183e-08	6.20142e-05	3.21183e-08	0.001	0.0022525
chr11:117061961_rs499713	SIDT2	-0.131239	-6.37757	3.22571e-08	4.18654e-05	3.22571e-08	0.001	0.0022525
chr1:120139819_rs12045785	ZNF697	0.779571	6.3768	3.23519e-08	3.50896e-05	3.23519e-08	0.001	0.0022525
chr3:75822064_rs13061980	LOC401074	0.45632	6.3747	3.26131e-08	3.43013e-05	3.26131e-08	0.001	0.0022525
chr4:141286763_rs2874479	SCOC	0.214325	6.36993	3.32159e-08	4.14583e-05	3.32159e-08	0.001	0.0022525
chr15:63224506_rs6494371	TPM1	-0.52948	-6.36703	3.3587e-08	4.46949e-05	3.3587e-08	0.001	0.0022525
chr5:76875691_rs57840239	WDR41	-0.108441	-6.3569	3.49164e-08	3.38307e-05	3.49164e-08	0.001	0.0022525
chr8:55056353_rs7012031	TCEA1	0.0653821	6.35636	3.49894e-08	6.63969e-05	3.49894e-08	0.001	0.0022525
chr7:5813480_rs10240006	RNF216	0.0687486	6.3534	3.53882e-08	3.11451e-05	3.53882e-08	0.001	0.0022525
chr1:33174965_rs2642545	KIAA1522	0.406766	6.35206	3.55708e-08	3.78608e-05	3.55708e-08	0.001	0.0022525
chr10:97390566_rs12773566	TCTN3	0.14677	6.34721	3.62374e-08	3.40236e-05	3.62374e-08	0.001	0.0022525
chr9:33467577_rs2275228	NOL6	-0.110961	-6.34554	3.64706e-08	5.50311e-05	3.64706e-08	0.001	0.0022525
chr17:73839498_rs9903200	UNC13D	0.0963498	6.34518	3.65206e-08	5.06167e-05	3.65206e-08	0.001	0.0022525
chr6:34368346_rs142353432	RPS10	0.136867	6.34293	3.68371e-08	1.98798e-05	3.68371e-08	0.001	0.0022525
chr10:135216590_rs7078208	MTG1	-0.415365	-6.33969	3.72965e-08	3.49502e-05	3.72965e-08	0.001	0.0022525
chr19:54701720_rs166252	RPS9	0.116336	6.33493	3.79833e-08	9.15314e-05	3.79833e-08	0.001	0.0022525
chr19:48615156_rs1616981	PLA2G4C	-0.311856	-6.33356	3.81826e-08	9.19219e-05	3.81826e-08	0.001	0.0022525
chr3:46047171_rs751667	FYCO1	0.289385	6.33207	3.84021e-08	3.97632e-05	3.84021e-08	0.001	0.0022525
chr6:158316612_rs6905976	SNX9	0.156699	6.33144	3.8495e-08	2.07062e-05	3.8495e-08	0.001	0.0022525
chr11:829539_rs28558789	POLR2L	0.104033	6.33131	3.85132e-08	4.90578e-05	3.85132e-08	0.001	0.0022525
chr1:161024782_rs12728349	USF1	-0.0806542	-6.33055	3.86254e-08	4.07872e-05	3.86254e-08	0.001	0.0022525
chr16:50051822_rs9933916	HEATR3	0.134061	6.32899	3.88574e-08	7.39767e-05	3.88574e-08	0.001	0.0022525
chr6:31847196_rs570263	HSPA1B	-1.16599	-6.32286	3.97807e-08	2.13468e-05	3.97807e-08	0.001	0.0022525
chr8:146220446_rs4489360	ZNF252P	-0.197826	-6.32056	4.0132e-08	7.47099e-05	4.0132e-08	0.001	0.0022525
chr1:213035671_rs12030572	FLVCR1	-0.241039	-6.31952	4.02926e-08	4.24149e-05	4.02926e-08	0.001	0.0022525
chr11:2321093_rs2521268	C11orf21	-0.197963	-6.31822	4.04934e-08	5.1317e-05	4.04934e-08	0.001	0.0022525
chr2:27619049_rs1083864	NRBP1	0.0609491	6.3136	4.12158e-08	6.01128e-05	4.12158e-08	0.001	0.0022525
chr11:77209966_rs35449255	PAK1	-0.131765	-6.31099	4.16303e-08	5.25925e-05	4.16303e-08	0.001	0.0022525
chr19:12890595_rs79814575	MAN2B1	0.205915	6.30275	4.29637e-08	0.000101254	4.29637e-08	0.001	0.0022525
chr5:114504589_rs973	TRIM36	-0.195195	-6.29765	4.38117e-08	4.16137e-05	4.38117e-08	0.001	0.0022525
chr1:9297492_rs12126056	H6PD	0.241819	6.29725	4.3879e-08	4.57766e-05	4.3879e-08	0.001	0.0022525
chr19:6739278_rs340141	GPR108	0.123079	6.29707	4.39088e-08	0.000103284	4.39088e-08	0.001	0.0022525
chr1:22000026_rs3818942	RAP1GAP	0.449065	6.29577	4.41281e-08	4.60097e-05	4.41281e-08	0.001	0.0022525
chr12:118748965_rs11068905	PEBP1	-0.119539	-6.29402	4.44238e-08	5.96477e-05	4.44238e-08	0.001	0.0022525
chr15:34669761_rs4984227	GOLGA8A	-0.50468	-6.29115	4.49153e-08	5.73773e-05	4.49153e-08	0.001	0.0022525
chr19:44072880_rs3213282	XRCC1	-0.123333	-6.29102	4.49371e-08	0.000105251	4.49371e-08	0.001	0.0022525
chr9:115918306_rs10121117	SLC31A2	0.198046	6.29024	4.50707e-08	6.54557e-05	4.50707e-08	0.001	0.0022525
chr3:179115501_rs13088298	MFN1	-0.210733	-6.28785	4.54851e-08	4.64366e-05	4.54851e-08	0.001	0.0022525
chr19:45146629_rs2301275	PVR	-0.171685	-6.28713	4.56117e-08	0.000106074	4.56117e-08	0.001	0.0022525
chr19:47203259_rs314664	PRKD2	-0.241454	-6.27934	4.69913e-08	0.000108922	4.69913e-08	0.001	0.0022525
chr21:47629268_rs2839145	MCM3AP	-0.0632445	-6.27798	4.72357e-08	4.90008e-05	4.72357e-08	0.001	0.0022525
chr1:11286178_rs12124983	MTOR	0.0598616	6.2742	4.79243e-08	4.96202e-05	4.79243e-08	0.001	0.0022525
chr10:22833063_rs10430590	PIP4K2A	0.125412	6.27193	4.83415e-08	4.41922e-05	4.83415e-08	0.001	0.0022525
chr3:10161518_rs67626468	BRK1	0.0836394	6.27178	4.83697e-08	4.91934e-05	4.83697e-08	0.001	0.0022525
chr19:59058444_rs3829643	TRIM28	0.116111	6.26789	4.90941e-08	0.000112999	4.90941e-08	0.001	0.0022525
chr6:32977535_rs396090	HLA-DOA	0.382155	6.26159	5.02923e-08	2.62252e-05	5.02923e-08	0.001	0.0022525
chr21:35979307_rs8134779	RCAN1	0.187739	6.25564	5.14495e-08	5.27602e-05	5.14495e-08	0.001	0.0022525
chr10:28801030_rs2790446	WAC-AS1	0.309345	6.25558	5.14613e-08	4.65499e-05	5.14613e-08	0.001	0.0022525
chr9:127989310_rs10121756	RABEPK	-0.157922	-6.25373	5.1827e-08	7.30856e-05	5.1827e-08	0.001	0.0022525
chr11:111469981_rs1784777	SIK2	0.0823258	6.25359	5.18554e-08	6.30665e-05	5.18554e-08	0.001	0.0022525
chr6:139072232_rs73774898	CCDC28A	0.105889	6.25213	5.2145e-08	2.70971e-05	5.2145e-08	0.001	0.0022525
chr7:76871378_rs73373661	FGL2	0.367255	6.24801	5.2973e-08	4.49158e-05	5.2973e-08	0.001	0.0022525
chr20:268474_rs6082245	C20orf96	-0.249557	-6.24465	5.36572e-08	6.01716e-05	5.36572e-08	0.001	0.0022525
chr10:72553092_rs10999540	SGPL1	-0.132048	-6.23848	5.49377e-08	4.91202e-05	5.49377e-08	0.001	0.0022525
chr7:76061790_rs10257917	DTX2	-0.138438	-6.2368	5.52929e-08	4.66501e-05	5.52929e-08	0.001	0.0022525
chr11:129972054_rs7933752	APLP2	-0.21387	-6.23678	5.52956e-08	6.64399e-05	5.52956e-08	0.001	0.0022525
chr4:102725324_rs7699179	BANK1	0.378817	6.23619	5.5421e-08	6.43624e-05	5.5421e-08	0.001	0.0022525
chr7:150383829_rs1234356	GIMAP7	0.424476	6.23367	5.59564e-08	4.71189e-05	5.59564e-08	0.001	0.0022525
chr18:60106486_rs7228522	ZCCHC2	0.118043	6.22679	5.74483e-08	0.000106814	5.74483e-08	0.001	0.0022525
chr17:77071002_rs8076010	ENGASE	-0.215076	-6.22581	5.76631e-08	7.6674e-05	5.76631e-08	0.001	0.0022525
chr12:13176310_rs6488576	HEBP1	-0.215606	-6.22551	5.77297e-08	7.44497e-05	5.77297e-08	0.001	0.0022525
chr7:75637839_rs79180770	STYXL1	-0.172614	-6.22066	5.88096e-08	4.91965e-05	5.88096e-08	0.001	0.0022525
chr7:23251005_rs858279	NUPL2	0.128024	6.22011	5.89325e-08	4.92859e-05	5.89325e-08	0.001	0.0022525
chr5:79657519_rs77407936	ZFYVE16	-0.217263	-6.21851	5.92948e-08	5.49577e-05	5.92948e-08	0.001	0.0022525
chr12:57886609_rs2672571	MARS	-0.0896685	-6.2181	5.93878e-08	7.62462e-05	5.93878e-08	0.001	0.0022525
chr5:1812965_rs13170104	MRPL36	0.175285	6.21795	5.94209e-08	5.50354e-05	5.94209e-08	0.001	0.0022525
chr4:37981204_rs62298543	TBC1D1	-0.197409	-6.21429	6.02578e-08	6.91029e-05	6.02578e-08	0.001	0.0022525
chr7:150457308_rs4554383	TMEM176B	0.858351	6.21159	6.08827e-08	5.07089e-05	6.08827e-08	0.001	0.0022525
chr1:113098015_rs10776756	CAPZA1	-0.0501651	-6.19855	6.3991e-08	6.4077e-05	6.3991e-08	0.001	0.0022525
chr6:26537609_rs4713007	HMGN4	-0.155826	-6.19553	6.47332e-08	3.30236e-05	6.47332e-08	0.001	0.0022525
chr15:90372623_rs34549499	ANPEP	0.183096	6.19138	6.57675e-08	7.72448e-05	6.57675e-08	0.001	0.0022525
chr6:3253841_rs11242828	AK096219	-0.251204	-6.19101	6.58609e-08	3.35418e-05	6.58609e-08	0.001	0.0022525
chr19:50101713_rs10417980	RPL13A	-0.0811109	-6.19062	6.59583e-08	0.000145167	6.59583e-08	0.001	0.0022525
chr9:127924012_rs4837012	PPP6C	0.0518668	6.18971	6.61886e-08	8.9562e-05	6.61886e-08	0.001	0.0022525
chr3:184026703_rs6845	PSMD2	0.0485438	6.18795	6.66331e-08	6.58644e-05	6.66331e-08	0.001	0.0022525
chr7:144532104_rs10261806	TPK1	0.124479	6.18792	6.66429e-08	5.48494e-05	6.66429e-08	0.001	0.0022525
chr2:175352058_rs4972668	GPR155	0.20376	6.18731	6.6797e-08	8.82522e-05	6.6797e-08	0.001	0.0022525
chr1:212537707_rs3767863	TMEM206	0.130522	6.18245	6.80486e-08	6.77982e-05	6.80486e-08	0.001	0.0022525
chr20:632567_rs13039785	SRXN1	0.247545	6.18101	6.8422e-08	7.39013e-05	6.8422e-08	0.001	0.0022525
chr11:118936910_rs471000	VPS11	-0.146571	-6.1779	6.92408e-08	7.90293e-05	6.92408e-08	0.001	0.0022525
chr22:46986896_rs56301329	GRAMD4	0.199996	6.1762	6.96901e-08	0.000128749	6.96901e-08	0.001	0.0022525
chr9:95818634_rs4744166	SUSD3	-0.607219	-6.17592	6.97657e-08	9.36133e-05	6.97657e-08	0.001	0.0022525
chr7:148960847_rs62505136	LOC155060	0.148974	6.17433	7.01894e-08	5.73365e-05	7.01894e-08	0.001	0.0022525
chr20:23394456_rs2424548	GZF1	-0.162873	-6.17039	7.12527e-08	7.67411e-05	7.12527e-08	0.001	0.0022525
chr3:151033597_rs6767266	P2RY13	-0.931076	-6.1695	7.14961e-08	7.01517e-05	7.14961e-08	0.001	0.0022525
chr9:210128_rs6475392	DOCK8	0.151806	6.16853	7.17611e-08	9.55957e-05	7.17611e-08	0.001	0.0022525
chr4:101439711_rs1501091	PPP3CA	-0.090314	-6.16669	7.22662e-08	8.07018e-05	7.22662e-08	0.001	0.0022525
chr3:178787131_rs4955806	ZMAT3	0.137034	6.16284	7.33351e-08	7.17144e-05	7.33351e-08	0.001	0.0022525
chr1:20857630_rs2000366	MUL1	-0.126342	-6.16258	7.34067e-08	7.25566e-05	7.34067e-08	0.001	0.0022525
chr19:52814459_rs78014032	ZNF480	-0.468098	-6.16205	7.35567e-08	0.000156776	7.35567e-08	0.001	0.0022525
chr2:204306356_rs55881728	ABI2	0.137018	6.15444	7.57227e-08	9.79415e-05	7.57227e-08	0.001	0.0022525
chr9:136561303_rs2502739	SLC2A6	0.228544	6.15092	7.67451e-08	0.00010078	7.67451e-08	0.001	0.0022525
chr13:115074878_rs7316983	UPF3A	0.242983	6.15013	7.6977e-08	0.000143389	7.6977e-08	0.001	0.0022525
chr17:4673023_rs6502821	CXCL16	0.36878	6.14944	7.71819e-08	9.92694e-05	7.71819e-08	0.001	0.0022525
chr19:580870_rs28992477	BSG	0.257789	6.14832	7.75115e-08	0.000162581	7.75115e-08	0.001	0.0022525
chr18:48704749_rs3829633	MEX3C	0.094538	6.14422	7.87314e-08	0.000143787	7.87314e-08	0.001	0.0022525
chr5:41659967_rs316709	C5orf51	0.138369	6.14076	7.97785e-08	7.15259e-05	7.97785e-08	0.001	0.0022525
chr18:47039902_rs112622413	RPL17	-0.481515	-6.13048	8.29672e-08	0.000150928	8.29672e-08	0.001	0.0022525
chr17:66449844_rs28449485	WIPI1	0.201409	6.12942	8.33013e-08	0.000106401	8.33013e-08	0.001	0.0022525
chr11:119468951_rs10790315	PVRL1	0.20537	6.12592	8.44196e-08	9.2778e-05	8.44196e-08	0.001	0.0022525
chr1:242063730_rs851783	MAP1LC3C	0.486184	6.12458	8.48516e-08	8.22611e-05	8.48516e-08	0.001	0.0022525
chr15:50827954_rs3101859	TRPM7	-0.0895933	-6.12006	8.6328e-08	9.57435e-05	8.6328e-08	0.001	0.0022525
chr13:32934911_rs11571717	BRCA2	0.215033	6.11595	8.7688e-08	0.000160873	8.7688e-08	0.001	0.0022525
chr3:81861238_rs2315967	GBE1	-0.191021	-6.11593	8.76976e-08	8.39146e-05	8.76976e-08	0.001	0.0022525
chr19:48981869_rs11882635	CYTH2	0.132214	6.11442	8.82033e-08	0.00018197	8.82033e-08	0.001	0.0022525
chr6:15475704_rs2237130	JARID2	0.085283	6.10936	8.99196e-08	4.42424e-05	8.99196e-08	0.001	0.0022525
chr6:26399586_rs6901118	BTN3A3	0.23101	6.10599	9.10803e-08	4.47523e-05	9.10803e-08	0.001	0.0022525
chr20:3223212_rs79029902	ITPA	0.217658	6.10165	9.25976e-08	9.78629e-05	9.25976e-08	0.001	0.0022525
chr19:16430149_rs75009320	KLF2	-0.598526	-6.1012	9.27584e-08	0.000189502	9.27584e-08	0.001	0.0022525
chr11:57484130_rs71460549	CLP1	-0.121215	-6.10112	9.27841e-08	0.000100151	9.27841e-08	0.001	0.0022525
chr7:158582653_rs72505584	ESYT2	-0.129861	-6.10083	9.28892e-08	7.30886e-05	9.28892e-08	0.001	0.0022525
chr17:73275747_rs11077783	SLC25A19	-0.14243	-6.09735	9.41274e-08	0.000118355	9.41274e-08	0.001	0.0022525
chr4:119171730_rs673682	SNHG8	-0.214503	-6.09571	9.47155e-08	0.00010226	9.47155e-08	0.001	0.0022525
chr7:30541797_rs28679	LOC401320	0.192094	6.09089	9.6471e-08	7.5654e-05	9.6471e-08	0.001	0.0022525
chr8:8818825_rs3948398	MFHAS1	-0.184145	-6.08952	9.69773e-08	0.000156226	9.69773e-08	0.001	0.0022525
chr13:27999506_rs1218795	GTF3A	-0.0978804	-6.08644	9.812e-08	0.000176345	9.812e-08	0.001	0.0022525
chr11:124171574_rs12795997	VWA5A	-0.23677	-6.08583	9.83459e-08	0.000104284	9.83459e-08	0.001	0.0022525
chr15:40328665_rs8208	SRP14	0.076865	6.08466	9.87879e-08	0.000107061	9.87879e-08	0.001	0.0022525
chr17:45000529_rs189899	GOSR2	-0.104369	-6.08074	1.00271e-07	0.000124331	1.00271e-07	0.001	0.0022525
chr4:184607970_rs9312316	TRAPPC11	0.0514458	6.08063	1.00314e-07	0.000107412	1.00314e-07	0.001	0.0022525
chr6:3003970_rs138616686	NQO2	0.443053	6.07983	1.00618e-07	4.8737e-05	1.00618e-07	0.001	0.0022525
chr17:43460891_rs114934705	PLEKHM1	-0.164765	-6.0796	1.00708e-07	0.000124779	1.00708e-07	0.001	0.0022525
chr19:7162789_rs1808531	CD209	-0.140118	-6.06915	1.04795e-07	0.000210513	1.04795e-07	0.001	0.0022525
chr19:35469750_rs295777	GRAMD1A	0.15524	6.05607	1.10139e-07	0.000218927	1.10139e-07	0.001	0.0022525
chr8:66508794_rs113093627	ARMC1	-0.0777741	-6.05171	1.1198e-07	0.000174584	1.1198e-07	0.001	0.0022525
chr2:71638583_rs58390593	ZNF638	0.108663	6.05125	1.12177e-07	0.000138032	1.12177e-07	0.001	0.0022525
chr5:102452556_rs34778	PPIP5K2	0.0619624	6.04965	1.1286e-07	9.83098e-05	1.1286e-07	0.001	0.0022525
chr3:53792411_rs12487452	SELK	0.116438	6.04932	1.13004e-07	0.000105914	1.13004e-07	0.001	0.0022525
chr7:36762723_rs7785921	AOAH	0.364228	6.04836	1.13415e-07	8.71541e-05	1.13415e-07	0.001	0.0022525
chr6:149939125_rs9379349	NUP43	0.112982	6.04693	1.14033e-07	5.46483e-05	1.14033e-07	0.001	0.0022525
chr11:110256891_rs7128618	FDX1	-0.205859	-6.0456	1.14611e-07	0.000118079	1.14611e-07	0.001	0.0022525
chr17:42873354_rs4792957	EFTUD2	0.0632933	6.04529	1.1475e-07	0.000140182	1.1475e-07	0.001	0.0022525
chr7:134127061_rs17167851	AKR1B1	-0.399689	-6.04226	1.16076e-07	8.89315e-05	1.16076e-07	0.001	0.0022525
chr11:94695222_rs11020983	CWC15	0.0752119	6.04064	1.16797e-07	0.000119871	1.16797e-07	0.001	0.0022525
chr2:47136950_rs35433380	MCFD2	0.117924	6.03904	1.17508e-07	0.000143207	1.17508e-07	0.001	0.0022525
chr19:8490750_rs10406499	2018-03-02	02:51:07.116000	6.03709	1.18382e-07	0.000229658	1.18382e-07	0.001	0.0022525
chr16:8760704_rs113281741	ABAT	0.349067	6.03312	1.20181e-07	0.000180537	1.20181e-07	0.001	0.0022525
chr20:61586179_rs11086147	SLC17A9	-0.149645	-6.03217	1.20615e-07	0.000124284	1.20615e-07	0.001	0.0022525
chr15:83271322_rs1259177	RPS17L	0.1056	6.03197	1.20708e-07	0.000126736	1.20708e-07	0.001	0.0022525
chr3:50332697_rs13100173	HYAL3	0.246974	6.0269	1.23058e-07	0.000114169	1.23058e-07	0.001	0.0022525
chr2:131089343_rs12232961	IMP4	-0.12476	-6.02263	1.2507e-07	0.00015063	1.2507e-07	0.001	0.0022525
chr3:44754177_rs6771160	ZNF197	-0.135819	-6.02196	1.25386e-07	0.000115925	1.25386e-07	0.001	0.0022525
chr1:205739266_rs708723	RAB7L1	-0.124124	-6.0219	1.25418e-07	0.000114603	1.25418e-07	0.001	0.0022525
chr10:65375862_rs7075628	REEP3	-0.204932	-6.01931	1.26655e-07	0.000106608	1.26655e-07	0.001	0.0022525
chr3:160477861_rs1829716	PPM1L	-0.0962518	-6.01241	1.30023e-07	0.000119419	1.30023e-07	0.001	0.0022525
chr7:150476550_rs4725943	TMEM176A	0.781741	6.0034	1.34547e-07	0.000100959	1.34547e-07	0.001	0.0022525
chr11:128419224_rs4396302	ETS1	-0.33043	-6.0019	1.35317e-07	0.000133754	1.35317e-07	0.001	0.0022525
chr5:134458673_rs687093	PITX1	0.530149	5.99892	1.36856e-07	0.000116107	1.36856e-07	0.001	0.0022525
chr16:11421513_rs34898332	RMI2	0.235159	5.99755	1.37568e-07	0.000200501	1.37568e-07	0.001	0.0022525
chr3:99953419_rs11915985	TBC1D23	0.0718852	5.99165	1.40686e-07	0.000127892	1.40686e-07	0.001	0.0022525
chr17:28444183_rs6505162	NSRP1	0.0935654	5.99019	1.41469e-07	0.00016877	1.41469e-07	0.001	0.0022525
chr17:48712087_rs4793665	ABCC3	0.307738	5.98337	1.45175e-07	0.000172879	1.45175e-07	0.001	0.0022525
chr2:69549262_rs13751	GFPT1	0.115819	5.98205	1.45907e-07	0.000171859	1.45907e-07	0.001	0.0022525
chr3:46345787_rs7374654	CCR2	1.07305	5.97971	1.47205e-07	0.00013344	1.47205e-07	0.001	0.0022525
chr17:7215536_rs1054378	GPS2	0.116552	5.97927	1.47451e-07	0.000175337	1.47451e-07	0.001	0.0022525
chr19:10225682_rs3816556	ANGPTL6	0.575773	5.97822	1.48041e-07	0.000272799	1.48041e-07	0.001	0.0022525
chr17:48779162_rs11650099	ANKRD40	0.0928885	5.97473	1.50017e-07	0.000178196	1.50017e-07	0.001	0.0022525
chr16:28823755_rs4533290	AK125489	-0.493063	-5.97396	1.50454e-07	0.000215105	1.50454e-07	0.001	0.0022525
chr11:126168992_rs8177391	FAM118B	-0.124783	-5.97172	1.51738e-07	0.000144477	1.51738e-07	0.001	0.0022525
chr6:10687746_rs7749306	TMEM14C	-0.171183	-5.97155	1.51835e-07	7.08705e-05	1.51835e-07	0.001	0.0022525
chr13:49428142_rs8000490	FNDC3A	0.0798291	5.9634	1.56605e-07	0.000262586	1.56605e-07	0.001	0.0022525
chr22:38196474_rs5756822	H1F0	0.224668	5.96064	1.58249e-07	0.000255082	1.58249e-07	0.001	0.0022525
chr7:43848545_rs35482897	BLVRA	0.152862	5.9568	1.60571e-07	0.000116459	1.60571e-07	0.001	0.0022525
chr5:140146894_rs13164503	NDUFA2	-0.0770289	-5.95556	1.61329e-07	0.000132053	1.61329e-07	0.001	0.0022525
chr10:115439394_rs7918733	CASP7	-0.170475	-5.95455	1.61949e-07	0.000133261	1.61949e-07	0.001	0.0022525
chr5:150535262_rs11750621	ANXA6	-0.240191	-5.95028	1.64589e-07	0.00013435	1.64589e-07	0.001	0.0022525
chr12:99097911_rs2288719	IKBIP	-0.176043	-5.95022	1.64626e-07	0.000183709	1.64626e-07	0.001	0.0022525
chr16:4600665_rs11076839	NMRAL1	-0.198332	-5.94974	1.64928e-07	0.000231963	1.64928e-07	0.001	0.0022525
chr1:153932212_rs6724	SLC39A1	-0.0894614	-5.94853	1.65685e-07	0.000146287	1.65685e-07	0.001	0.0022525
chr19:4655863_rs2003489	C19orf10	0.14309	5.94298	1.69207e-07	0.00030187	1.69207e-07	0.001	0.0022525
chr11:2963670_rs4758562	NAP1L4	-0.104437	-5.93503	1.74383e-07	0.000159943	1.74383e-07	0.001	0.0022525
chr5:141358791_rs78904720	RNF14	0.0936309	5.93441	1.74795e-07	0.000142031	1.74795e-07	0.001	0.0022525
chr20:34155764_rs79643801	ERGIC3	0.226802	5.9328	1.75862e-07	0.000173471	1.75862e-07	0.001	0.0022525
chr17:4673023_rs6502821	ZMYND15	0.522111	5.93189	1.76474e-07	0.000206873	1.76474e-07	0.001	0.0022525
chr20:57571763_rs9760	NELFCD	0.151253	5.92959	1.78014e-07	0.000174802	1.78014e-07	0.001	0.0022525
chr4:52758294_rs4865414	SGCB	0.509381	5.92952	1.78065e-07	0.000178812	1.78065e-07	0.001	0.0022525
chr11:60145822_rs2233239	MS4A7	-0.479982	-5.92823	1.78934e-07	0.000163153	1.78934e-07	0.001	0.0022525
chr12:51792725_rs6580828	GALNT6	-0.143835	-5.92298	1.82531e-07	0.000199263	1.82531e-07	0.001	0.0022525
chr1:85067560_rs12119873	CTBS	0.193592	5.9176	1.86284e-07	0.000160327	1.86284e-07	0.001	0.0022525
chr1:26545048_rs6697209	CD52	0.680004	5.91642	1.87124e-07	0.000160844	1.87124e-07	0.001	0.0022525
chr17:72988635_rs62086348	UNK	-0.0980378	-5.91623	1.87257e-07	0.000217738	1.87257e-07	0.001	0.0022525
chr3:133343968_rs6806750	TOPBP1	-0.0722656	-5.91127	1.90809e-07	0.000167697	1.90809e-07	0.001	0.0022525
chr16:84084689_rs74999097	MBTPS1	-0.164173	-5.91064	1.91258e-07	0.000261552	1.91258e-07	0.001	0.0022525
chr19:55127630_rs10416697	LILRA2	-0.35367	-5.91035	1.91469e-07	0.000324758	1.91469e-07	0.001	0.0022525
chr3:53933458_rs6794006	ACTR8	0.136893	5.91019	1.9159e-07	0.000168107	1.9159e-07	0.001	0.0022525
chr22:43583604_rs9608008	TTLL12	0.173934	5.90615	1.94537e-07	0.000300853	1.94537e-07	0.001	0.0022525
chr2:238675892_rs10179864	LRRFIP1	0.0823243	5.90476	1.95567e-07	0.000221925	1.95567e-07	0.001	0.0022525
chr10:4956083_rs11594322	AKR1C3	-0.981674	-5.90344	1.96547e-07	0.000157673	1.96547e-07	0.001	0.0022525
chr6:4154143_rs13206876	ECI2	0.250447	5.90191	1.97685e-07	8.97013e-05	1.97685e-07	0.001	0.0022525
chr7:56150052_rs3778867	SUMF2	-0.164843	-5.90166	1.97877e-07	0.000138113	1.97877e-07	0.001	0.0022525
chr8:61428280_rs2875967	RAB2A	-0.0696142	-5.90063	1.98649e-07	0.000279615	1.98649e-07	0.001	0.0022525
chr17:1013671_rs2258277	ABR	0.114371	5.89774	2.00832e-07	0.000232135	2.00832e-07	0.001	0.0022525
chr7:75252714_rs1179620	HIP1	-0.140701	-5.89587	2.02261e-07	0.000140723	2.02261e-07	0.001	0.0022525
chr12:123719528_rs7139321	ARL6IP4	-0.0675294	-5.89174	2.05447e-07	0.000220939	2.05447e-07	0.001	0.0022525
chr2:27605983_rs7423104	PPM1G	-0.0621268	-5.89121	2.05856e-07	0.000231537	2.05856e-07	0.001	0.0022525
chr17:7011144_rs62058755	ASGR2	0.554492	5.88673	2.09376e-07	0.000241252	2.09376e-07	0.001	0.0022525
chr20:5970750_rs6053816	MCM8	0.187459	5.88669	2.0941e-07	0.000202628	2.0941e-07	0.001	0.0022525
chr1:16005792_rs12082523	DDI2	0.0883215	5.88291	2.12424e-07	0.000179143	2.12424e-07	0.001	0.0022525
chr16:31165795_rs57611503	BCKDK	-0.0965337	-5.88168	2.1341e-07	0.000285371	2.1341e-07	0.001	0.0022525
chr7:98977515_rs10236149	ARPC1B	-0.0992714	-5.87915	2.15463e-07	0.000148524	2.15463e-07	0.001	0.0022525
chr22:21241854_rs165877	PI4KA	0.0554376	5.87821	2.16236e-07	0.000330797	2.16236e-07	0.001	0.0022525
chr22:22157661_rs5749986	MAPK1	-0.068497	-5.87451	2.19284e-07	0.000335082	2.19284e-07	0.001	0.0022525
chr17:44848314_rs3809857	KANSL1	0.124056	5.87303	2.20507e-07	0.000251623	2.20507e-07	0.001	0.0022525
chr1:183559861_rs2333681	NCF2	-0.105247	-5.8666	2.25934e-07	0.000188432	2.25934e-07	0.001	0.0022525
chr16:88759207_rs11646325	RNF166	0.178768	5.86478	2.27498e-07	0.00030176	2.27498e-07	0.001	0.0022525
chr20:43996012_rs2664543	SYS1	-0.0920646	-5.86265	2.29333e-07	0.000219512	2.29333e-07	0.001	0.0022525
chr7:140067576_rs12703792	SLC37A3	-0.3347	-5.85635	2.34861e-07	0.000160355	2.34861e-07	0.001	0.0022525
chr8:8930740_rs10087078	ERI1	-0.481605	-5.85595	2.35217e-07	0.000316958	2.35217e-07	0.001	0.0022525
chr11:34488285_rs7928213	CAT	0.184679	5.85523	2.35857e-07	0.000205311	2.35857e-07	0.001	0.0022525
chr6:114019192_rs17787923	MARCKS	0.221775	5.85472	2.36308e-07	0.000105043	2.36308e-07	0.001	0.0022525
chr15:79222642_rs28699989	CTSH	-0.587349	-5.85471	2.36319e-07	0.0002153	2.36319e-07	0.001	0.0022525
chr1:19935449_rs1569634	MINOS1	-0.0692891	-5.85413	2.36842e-07	0.000196369	2.36842e-07	0.001	0.0022525
chr17:47042117_rs4794006	UBE2Z	0.100885	5.85206	2.38703e-07	0.000269964	2.38703e-07	0.001	0.0022525
chr11:33203082_rs7482352	CSTF3	0.093191	5.84864	2.41805e-07	0.000209024	2.41805e-07	0.001	0.0022525
chr12:100414409_rs11833159	ACTR6	-0.133519	-5.84207	2.47881e-07	0.000258222	2.47881e-07	0.001	0.0022525
chr18:71942127_rs10514120	CYB5A	0.220365	5.83945	2.50343e-07	0.000410994	2.50343e-07	0.001	0.0022525
chr12:108944229_rs2052424	ISCU	0.172444	5.83663	2.53029e-07	0.000263065	2.53029e-07	0.001	0.0022525
chr11:107992312_rs3741054	ACAT1	-0.121783	-5.8363	2.53339e-07	0.000215078	2.53339e-07	0.001	0.0022525
chr4:68549511_rs2627255	STAP1	-0.967138	-5.83473	2.54848e-07	0.000246212	2.54848e-07	0.001	0.0022525
chr17:74401522_rs445683	SPHK1	-0.454146	-5.83213	2.57362e-07	0.000288501	2.57362e-07	0.001	0.0022525
chr3:112330056_rs11489073	SLC35A5	0.0842904	5.82944	2.59992e-07	0.000220611	2.59992e-07	0.001	0.0022525
chr6:42841231_rs1150797	RPL7L1	0.0535971	5.8286	2.60812e-07	0.000114983	2.60812e-07	0.001	0.0022525
chr14:104027557_rs11625397	BAG5	-0.0586072	-5.82854	2.60875e-07	0.000272069	2.60875e-07	0.001	0.0022525
chr3:119390590_rs11923223	POPDC2	0.162329	5.82582	2.6357e-07	0.00022337	2.6357e-07	0.001	0.0022525
chr10:93408214_rs57754500	BTAF1	0.114432	5.82517	2.64212e-07	0.000205018	2.64212e-07	0.001	0.0022525
chr12:97328370_rs249574	NEDD1	0.117826	5.82214	2.67255e-07	0.000277127	2.67255e-07	0.001	0.0022525
chr4:152067460_rs7699495	RPS3A	0.116369	5.81909	2.70345e-07	0.000259359	2.70345e-07	0.001	0.0022525
chr2:44566782_rs6740365	PREPL	-0.146297	-5.81474	2.74822e-07	0.000292866	2.74822e-07	0.001	0.0022525
chr22:39007174_rs5757177	CBY1	0.177018	5.80888	2.80962e-07	0.000418078	2.80962e-07	0.001	0.0022525
chr1:156085375_rs547915	LMNA	-0.170954	-5.80755	2.82382e-07	0.000226998	2.82382e-07	0.001	0.0022525
chr1:43638255_rs113994355	EBNA1BP2	-0.119147	-5.80537	2.84707e-07	0.000228627	2.84707e-07	0.001	0.0022525
chr15:83613169_rs2219889	FAM103A1	0.539367	5.80474	2.85387e-07	0.000249533	2.85387e-07	0.001	0.0022525
chr8:95407142_rs4735291	KIAA1429	0.055445	5.80403	2.86157e-07	0.000361461	2.86157e-07	0.001	0.0022525
chr1:31911938_rs6695065	SERINC2	-0.622877	-5.80199	2.88358e-07	0.000231247	2.88358e-07	0.001	0.0022525
chr22:21169294_rs165898	PI4KAP2	-0.362093	-5.79002	3.01673e-07	0.000437431	3.01673e-07	0.001	0.0022525
chr14:59810480_rs61984498	JKAMP	-0.173724	-5.78967	3.02073e-07	0.00031148	3.02073e-07	0.001	0.0022525
chr3:149456154_rs12330718	COMMD2	-0.0989024	-5.78904	3.02788e-07	0.000252632	3.02788e-07	0.001	0.0022525
chr22:18081136_rs2287228	ATP6V1E1	0.116807	5.78807	3.03898e-07	0.000438932	3.03898e-07	0.001	0.0022525
chr16:15181703_rs2966178	LOC100288332	-0.336028	-5.78807	3.03904e-07	0.000384137	3.03904e-07	0.001	0.0022525
chr20:10427011_rs6104612	MKKS	0.104863	5.78138	3.11658e-07	0.000289967	3.11658e-07	0.001	0.0022525
chr2:3419574_rs12233144	TRAPPC12	-0.0749945	-5.77998	3.13313e-07	0.000327363	3.13313e-07	0.001	0.0022525
chr5:58556268_rs72765953	PDE4D	-0.769175	-5.77764	3.16089e-07	0.000238291	3.16089e-07	0.001	0.0022525
chr2:65224648_rs7592468	SLC1A4	0.254965	5.77439	3.19978e-07	0.000333101	3.19978e-07	0.001	0.0022525
chr20:33736188_rs17092378	PROCR	0.373312	5.77196	3.22917e-07	0.000297716	3.22917e-07	0.001	0.0022525
chr12:51631277_rs11169775	DAZAP2	0.113022	5.76479	3.31764e-07	0.000335125	3.31764e-07	0.001	0.0022525
chr3:101190009_rs144969926	SENP7	0.135416	5.76339	3.33518e-07	0.000276003	3.33518e-07	0.001	0.0022525
chr6:170854269_rs80139108	PDCD2	-0.138331	-5.75969	3.38201e-07	0.000145433	3.38201e-07	0.001	0.0022525
chr9:93744324_rs167201	ROR2	0.655085	5.75794	3.4043e-07	0.000359347	3.4043e-07	0.001	0.0022525
chr20:21223498_rs2252714	XRN2	-0.0339801	-5.75621	3.42652e-07	0.000314199	3.42652e-07	0.001	0.0022525
chr19:38755864_rs3786870	SPINT2	0.10379	5.75433	3.4509e-07	0.000508022	3.4509e-07	0.001	0.0022525
chr10:76248814_rs35273093	ADK	-0.353357	-5.75409	3.45409e-07	0.000254616	3.45409e-07	0.001	0.0022525
chr1:10375179_rs7553935	PGD	-0.127594	-5.75369	3.4592e-07	0.000269989	3.4592e-07	0.001	0.0022525
chr16:75382194_rs7192155	CFDP1	0.10798	5.75308	3.46723e-07	0.000431854	3.46723e-07	0.001	0.0022525
chr16:1278424_rs1060341	TPSB2	-1.82977	-5.73831	3.66538e-07	0.000451978	3.66538e-07	0.001	0.0022525
chr19:44260929_rs61387190	SMG9	-0.149388	-5.73022	3.77869e-07	0.000544592	3.77869e-07	0.001	0.0022525
chr4:156874833_rs2292538	CTSO	0.141078	5.72793	3.81137e-07	0.000348599	3.81137e-07	0.001	0.0022525
chr17:73049228_rs60660596	ATP5H	-0.110337	-5.72471	3.85772e-07	0.000410333	3.85772e-07	0.001	0.0022525
chr4:1698224_rs798720	TMEM129	0.136691	5.72074	3.91575e-07	0.000356562	3.91575e-07	0.001	0.0022525
chr16:15150773_rs12928424	RRN3	0.109608	5.71788	3.95805e-07	0.00047365	3.95805e-07	0.001	0.0022525
chr3:33087200_rs6780220	GLB1	0.0932645	5.71673	3.97524e-07	0.000320387	3.97524e-07	0.001	0.0022525
chr1:6283062_rs12070839	ICMT	0.119828	5.71568	3.99095e-07	0.000303681	3.99095e-07	0.001	0.0022525
chr3:128640987_rs1683784	RPN1	0.212034	5.71351	4.02375e-07	0.000323457	4.02375e-07	0.001	0.0022525
chr3:32195127_rs7622177	GPD1L	0.190038	5.70776	4.11154e-07	0.00032944	4.11154e-07	0.001	0.0022525
chr15:60931471_rs1054156	RORA	0.397582	5.70655	4.13036e-07	0.00034223	4.13036e-07	0.001	0.0022525
chr6:18153330_rs2518469	TPMT	-0.102853	-5.70357	4.17681e-07	0.000175995	4.17681e-07	0.001	0.0022525
chr5:102201590_rs249496	PAM	0.320064	5.70241	4.19501e-07	0.000306324	4.19501e-07	0.001	0.0022525
chr2:45784573_rs3770295	SRBD1	-0.108262	-5.70153	4.20901e-07	0.000419587	4.20901e-07	0.001	0.0022525
chr2:198905224_rs12329164	PLCL1	0.199156	5.70003	4.23273e-07	0.000421495	4.23273e-07	0.001	0.0022525
chr6:110062288_rs13203636	CD164	-0.0769655	-5.69977	4.23692e-07	0.000178195	4.23692e-07	0.001	0.0022525
chr7:45139163_rs6967748	TBRG4	-0.0834841	-5.69763	4.271e-07	0.000259502	4.271e-07	0.001	0.0022525
chr11:74845146_rs17133732	NEU3	0.0912765	5.69592	4.29852e-07	0.000331298	4.29852e-07	0.001	0.0022525
chr19:55668819_rs11667847	TNNT1	-1.44834	-5.69274	4.35021e-07	0.000604268	4.35021e-07	0.001	0.0022525
chr7:143085819_rs6954724	ZYX	-0.17347	-5.69172	4.36695e-07	0.000264387	4.36695e-07	0.001	0.0022525
chr16:22397709_rs117151725	LOC100271836	0.566801	5.69068	4.38403e-07	0.000513771	4.38403e-07	0.001	0.0022525
chr17:73054919_rs12150430	KCTD2	0.0899814	5.69063	4.38489e-07	0.000459269	4.38489e-07	0.001	0.0022525
chr14:69316977_rs67401203	ACTN1	0.137248	5.68717	4.44216e-07	0.000435282	4.44216e-07	0.001	0.0022525
chr15:75903248_rs113756657	SNUPN	0.12953	5.68389	4.49718e-07	0.0003685	4.49718e-07	0.001	0.0022525
chr17:79637552_rs55814747	CCDC137	0.125986	5.68272	4.51704e-07	0.000471365	4.51704e-07	0.001	0.0022525
chr16:1306681_rs1141967	TPSAB1	1.94301	5.679	4.58058e-07	0.000528195	4.58058e-07	0.001	0.0022525
chr3:121497502_rs6775544	EAF2	-0.167556	-5.67895	4.58149e-07	0.000354073	4.58149e-07	0.001	0.0022525
chr22:32104667_rs131221	PRR14L	-0.0826434	-5.67738	4.60857e-07	0.000599893	4.60857e-07	0.001	0.0022525
chr1:154684462_rs61811432	ADAM15	0.182928	5.67613	4.63018e-07	0.00034162	4.63018e-07	0.001	0.0022525
chr15:99787161_rs71399866	TTC23	0.331296	5.67324	4.6807e-07	0.000380898	4.6807e-07	0.001	0.0022525
chr20:31451350_rs6141833	MAPRE1	-0.0550594	-5.67065	4.72635e-07	0.000420763	4.72635e-07	0.001	0.0022525
chr14:91254042_rs11629223	TTC7B	-0.181189	-5.66952	4.74641e-07	0.000459965	4.74641e-07	0.001	0.0022525
chr1:40747919_rs6691598	ZMPSTE24	0.0675275	5.66727	4.78673e-07	0.000351188	4.78673e-07	0.001	0.0022525
chr22:37793515_rs7286042	SH3BP1	-0.0882143	-5.66337	4.85726e-07	0.000628386	4.85726e-07	0.001	0.0022525
chr20:13708796_rs56024260	ESF1	-0.115779	-5.66274	4.86871e-07	0.000431891	4.86871e-07	0.001	0.0022525
chr6:2953252_rs2244693	SERPINB6	-0.110266	-5.66181	4.88582e-07	0.000201923	4.88582e-07	0.001	0.0022525
chr3:52569098_rs4687626	NT5DC2	0.209932	5.65938	4.9304e-07	0.000373733	4.9304e-07	0.001	0.0022525
chr21:27085824_rs2829876	GABPA	0.145888	5.6567	4.98035e-07	0.00033951	4.98035e-07	0.001	0.0022525
chr11:66362997_rs498045	CCS	-0.156798	-5.6554	5.00456e-07	0.000369743	5.00456e-07	0.001	0.0022525
chr9:94753916_rs57862149	SPTLC1	0.0986817	5.646	5.18415e-07	0.000518886	5.18415e-07	0.001	0.0022525
chr17:37824545_rs876493	STARD3	0.11309	5.64342	5.23445e-07	0.00053393	5.23445e-07	0.001	0.0022525
chr2:598782_rs10495481	TMEM18	-0.267497	-5.64123	5.27772e-07	0.000502511	5.27772e-07	0.001	0.0022525
chr7:17920253_rs17138358	SNX13	0.0571014	5.63415	5.41956e-07	0.000313533	5.41956e-07	0.001	0.0022525
chr17:73877459_rs66496607	TRIM65	0.119956	5.63146	5.47442e-07	0.000555885	5.47442e-07	0.001	0.0022525
chr17:19604795_rs35244631	SLC47A1	-0.404092	-5.63099	5.48398e-07	0.000556615	5.48398e-07	0.001	0.0022525
chr10:75008561_rs1064020	DNAJC9	-0.0690085	-5.63011	5.50209e-07	0.00037548	5.50209e-07	0.001	0.0022525
chr3:105922594_rs10511254	CBLB	-0.198647	-5.62989	5.50666e-07	0.000404397	5.50666e-07	0.001	0.0022525
chr7:100756649_rs2410796	SERPINE1	-0.391097	-5.62748	5.55657e-07	0.00032055	5.55657e-07	0.001	0.0022525
chr18:77676617_rs62101188	PQLC1	-0.1141	-5.62598	5.5879e-07	0.000799696	5.5879e-07	0.001	0.0022525
chr15:83775252_rs1901544	HOMER2	0.131728	5.62495	5.60944e-07	0.000442405	5.60944e-07	0.001	0.0022525
chr11:57078721_rs3935068	TNKS1BP1	0.245043	5.62438	5.62161e-07	0.000399469	5.62161e-07	0.001	0.0022525
chr12:121035474_rs664211	COQ5	-0.121336	-5.62263	5.65842e-07	0.000511495	5.65842e-07	0.001	0.0022525
chr3:62305073_rs41276485	C3orf14	0.451206	5.61673	5.78493e-07	0.000421229	5.78493e-07	0.001	0.0022525
chr17:44662558_rs117692492	NSFP1	1.29739	5.61664	5.78683e-07	0.000579373	5.78683e-07	0.001	0.0022525
chr9:116259939_rs7037761	RGS3	0.408935	5.61304	5.86543e-07	0.00057636	5.86543e-07	0.001	0.0022525
chr11:67200819_rs4930427	RPS6KB2	0.101029	5.61221	5.88364e-07	0.000415561	5.88364e-07	0.001	0.0022525
chr19:58892510_rs10469313	RPS5	0.069895	5.61067	5.91764e-07	0.000770089	5.91764e-07	0.001	0.0022525
chr2:27432500_rs2580759	ATRAID	-0.0753201	-5.60713	5.99655e-07	0.000558422	5.99655e-07	0.001	0.0022525
chr16:3061868_rs8051120	MMP25	0.281658	5.60692	6.00121e-07	0.000657349	6.00121e-07	0.001	0.0022525
chr11:27517409_rs1140711	LIN7C	0.0848883	5.60391	6.06924e-07	0.000425412	6.06924e-07	0.001	0.0022525
chr17:80002371_rs57998969	DCXR	-0.18317	-5.60361	6.07596e-07	0.000605936	6.07596e-07	0.001	0.0022525
chr10:70280398_rs78573780	SIRT1	0.0943527	5.59736	6.21983e-07	0.000419033	6.21983e-07	0.001	0.0022525
chr1:87614821_rs1886634	LMO4	-0.149735	-5.59717	6.22415e-07	0.000438867	6.22415e-07	0.001	0.0022525
chr10:104285086_rs10786674	ARL3	0.162304	5.59581	6.25591e-07	0.000421112	6.25591e-07	0.001	0.0022525
chr8:56680416_rs6999060	TGS1	-0.13456	-5.59378	6.3035e-07	0.000667882	6.3035e-07	0.001	0.0022525
chr1:210779294_rs11119549	CAMK1G	-0.620025	-5.59378	6.30368e-07	0.000443775	6.30368e-07	0.001	0.0022525
chr16:69467226_rs59228983	CYB5B	0.0860607	5.58971	6.4002e-07	0.000694892	6.4002e-07	0.001	0.0022525
chr2:187501682_rs56136540	ITGAV	0.150583	5.58588	6.49251e-07	0.000595741	6.49251e-07	0.001	0.0022525
chr20:47442003_rs6095314	PREX1	-0.0633665	-5.58546	6.50275e-07	0.000545713	6.50275e-07	0.001	0.0022525
chr3:99537305_rs793469	CMSS1	0.153696	5.58429	6.5313e-07	0.000468472	6.5313e-07	0.001	0.0022525
chr15:83664519_rs2381028	BTBD1	-0.0657523	-5.58047	6.62529e-07	0.000503433	6.62529e-07	0.001	0.0022525
chr22:29981134_rs9613970	NIPSNAP1	-0.216446	-5.57835	6.67794e-07	0.000780477	6.67794e-07	0.001	0.0022525
chr21:48019239_rs9722	S100B	-0.822744	-5.57751	6.69898e-07	0.000444807	6.69898e-07	0.001	0.0022525
chr10:135196301_rs4838735	PAOX	-0.287773	-5.57696	6.71276e-07	0.000448131	6.71276e-07	0.001	0.0022525
chr11:62526650_rs2957162	TTC9C	-0.125194	-5.57614	6.73338e-07	0.000464401	6.73338e-07	0.001	0.0022525
chr3:121744278_rs6801693	CD86	0.167088	5.55974	7.15872e-07	0.000504659	7.15872e-07	0.001	0.0022525
chr5:154200612_rs3867430	LARP1	0.0462516	5.55761	7.21602e-07	0.000489597	7.21602e-07	0.001	0.0022525
chr17:20893909_rs1531566	USP22	0.064493	5.55621	7.25374e-07	0.000709905	7.25374e-07	0.001	0.0022525
chr5:145541415_rs35131794	LARS	-0.0854809	-5.55615	7.25526e-07	0.000492132	7.25526e-07	0.001	0.0022525
chr1:47860423_rs12042790	TAL1	-0.796628	-5.55535	7.2771e-07	0.000502794	7.2771e-07	0.001	0.0022525
chr6:90340276_rs3210511	LYRM2	0.0774389	5.55321	7.33553e-07	0.000291584	7.33553e-07	0.001	0.0022525
chr2:24455830_rs1559472	FKBP1B	-0.243388	-5.55256	7.35322e-07	0.000660718	7.35322e-07	0.001	0.0022525
chr16:1893122_rs28780723	HAGH	0.104604	5.55174	7.37572e-07	0.00077824	7.37572e-07	0.001	0.0022525
chr2:217380771_rs75360550	RPL37A	0.0798839	5.55146	7.38351e-07	0.000662995	7.38351e-07	0.001	0.0022525
chr5:96003149_rs6897588	CAST	-0.135261	-5.54979	7.42966e-07	0.000502262	7.42966e-07	0.001	0.0022525
chr11:211841_rs75256197	IFITM2	0.800927	5.54455	7.57647e-07	0.000513982	7.57647e-07	0.001	0.0022525
chr15:97308330_rs3751529	SPATA8	1.8256	5.54442	7.57995e-07	0.00056439	7.57995e-07	0.001	0.0022525
chr1:31881472_rs1039630	FABP3	0.190966	5.54288	7.62387e-07	0.000524926	7.62387e-07	0.001	0.0022525
chr5:172256024_rs1564259	ERGIC1	-0.108335	-5.54156	7.66145e-07	0.00051539	7.66145e-07	0.001	0.0022525
chr21:45722442_rs3788116	PFKL	0.0912601	5.53566	7.83192e-07	0.00050641	7.83192e-07	0.001	0.0022525
chr17:74554739_rs4648343	SNHG16	-0.188831	-5.53166	7.94961e-07	0.000771386	7.94961e-07	0.001	0.0022525
chr1:246889490_rs35570407	SCCPDH	0.193757	5.52514	8.14542e-07	0.000553092	8.14542e-07	0.001	0.0022525
chr15:45940962_rs72715005	SQRDL	0.13686	5.52461	8.16147e-07	0.000598066	8.16147e-07	0.001	0.0022525
chr1:156378037_rs16837370	C1orf85	-0.147767	-5.52167	8.25131e-07	0.000558223	8.25131e-07	0.001	0.0022525
chr19:18556749_rs34053595	ISYNA1	0.209571	5.52068	8.28194e-07	0.00100725	8.28194e-07	0.001	0.0022525
chr1:35888147_rs1211184	ZMYM4	0.0584081	5.51988	8.30652e-07	0.000561046	8.30652e-07	0.001	0.0022525
chr2:202338849_rs2714489	TRAK2	-0.0824084	-5.51822	8.35804e-07	0.000735474	8.35804e-07	0.001	0.0022525
chr3:183649870_rs4148593	ABCC5	0.120756	5.51518	8.45335e-07	0.000580216	8.45335e-07	0.001	0.0022525
chr19:10720886_rs8100854	SLC44A2	-0.529266	-5.51269	8.5321e-07	0.00103181	8.5321e-07	0.001	0.0022525
chr8:74895087_rs3816751	LY96	0.106321	5.50515	8.77528e-07	0.000853357	8.77528e-07	0.001	0.0022525
chr17:33760649_rs2671832	SLFN12	0.110518	5.50445	8.79805e-07	0.000846266	8.79805e-07	0.001	0.0022525
chr1:202944146_rs7554506	CYB5R1	-0.120559	-5.5013	8.90195e-07	0.000590694	8.90195e-07	0.001	0.0022525
chr2:176071906_rs268172	ATP5G3	0.0581636	5.4997	8.9551e-07	0.000778365	8.9551e-07	0.001	0.0022525
chr18:47023696_rs6507925	C18orf32	-0.0603601	-5.49899	8.97888e-07	0.00115792	8.97888e-07	0.001	0.0022525
chr2:113836165_rs11123160	IL36RN	1.75739	5.49762	9.02497e-07	0.000784068	9.02497e-07	0.001	0.0022525
chr4:100989523_rs4699772	DNAJB14	-0.0551534	-5.49505	9.11179e-07	0.000760398	9.11179e-07	0.001	0.0022525
chr15:80212143_rs4994245	MTHFS	0.609595	5.49182	9.22172e-07	0.000658475	9.22172e-07	0.001	0.0022525
chr10:27513891_rs2780679	ACBD5	-0.076147	-5.49049	9.26777e-07	0.000592892	9.26777e-07	0.001	0.0022525
chr9:94264497_rs6479344	NOL8	-0.0769773	-5.48284	9.53541e-07	0.000865903	9.53541e-07	0.001	0.0022525
chr15:65284602_rs28578988	ANKDD1A	-0.200808	-5.47911	9.66858e-07	0.000683882	9.66858e-07	0.001	0.0022525
chr2:86795038_rs10432704	CHMP3	-0.0702054	-5.47348	9.8733e-07	0.000844836	9.8733e-07	0.001	0.0022525
chr9:130166957_rs3802364	SLC2A8	0.142128	5.47028	9.9913e-07	0.000900486	9.9913e-07	0.001	0.0022525
chr2:37651922_rs7587134	QPCT	-0.145507	-5.46886	1.00441e-06	0.00085787	1.00441e-06	0.001	0.0022525
chr19:16296908_rs67000086	FAM32A	-0.124602	-5.46882	1.00459e-06	0.0011773	1.00459e-06	0.001	0.0022525
chr1:16129320_rs2013019	SPEN	0.0481251	5.4677	1.00879e-06	0.000652583	1.00879e-06	0.001	0.0022525
chr3:13450019_rs6802950	NUP210	0.22171	5.46742	1.00983e-06	0.000661239	1.00983e-06	0.001	0.0022525
chr2:119979210_rs838060	STEAP3	0.419032	5.46271	1.02766e-06	0.000874083	1.02766e-06	0.001	0.0022525
chr2:187172303_rs59532094	ZC3H15	0.118088	5.45795	1.04601e-06	0.000886628	1.04601e-06	0.001	0.0022525
chr1:111680215_rs325929	CEPT1	0.0686299	5.45092	1.07368e-06	0.000689567	1.07368e-06	0.001	0.0022525
chr6:32571508_rs111841857	HLA-DQA2	-7.38902	-5.44988	1.07786e-06	0.000411496	1.07786e-06	0.001	0.0022525
chr10:126077802_rs11244662	OAT	-0.169652	-5.4454	1.09591e-06	0.000689624	1.09591e-06	0.001	0.0022525
chr20:442937_rs708978	TBC1D20	0.0811667	5.44196	1.11001e-06	0.000827616	1.11001e-06	0.001	0.0022525
chr15:23017737_rs56334573	NIPA2	0.11346	5.44154	1.11175e-06	0.000768442	1.11175e-06	0.001	0.0022525
chr12:113771091_rs78987494	SLC24A6	-0.0866368	-5.4369	1.13107e-06	0.00093193	1.13107e-06	0.001	0.0022525
chr15:82538094_rs7176926	EFTUD1	0.0934601	5.43588	1.13537e-06	0.000782721	1.13537e-06	0.001	0.0022525
chr17:47275634_rs9303548	ABI3	0.436018	5.43408	1.14297e-06	0.00106005	1.14297e-06	0.001	0.0022525
chr21:38901769_rs76879504	DYRK1A	-0.0844848	-5.43048	1.15837e-06	0.000694425	1.15837e-06	0.001	0.0022525
chr17:45364540_rs5919	ITGB3	0.38524	5.42287	1.19152e-06	0.00109726	1.19152e-06	0.001	0.0022525
chr19:30194290_rs141079994	C19orf12	-0.112581	-5.41766	1.21481e-06	0.00136634	1.21481e-06	0.001	0.0022525
chr15:45475503_rs1706820	DUOX1	-0.147982	-5.41216	1.23981e-06	0.000842486	1.23981e-06	0.001	0.0022525
chr9:123603469_rs12343516	FBXW2	0.0568031	5.40328	1.2813e-06	0.00109249	1.2813e-06	0.001	0.0022525
chr2:191452733_rs55788736	MFSD6	-0.231575	-5.39092	1.34138e-06	0.00107902	1.34138e-06	0.001	0.0022525
chr14:74054221_rs1859910	ACOT2	0.29752	5.38911	1.35041e-06	0.0011328	1.35041e-06	0.001	0.0022525
chr17:56176960_rs57673254	DYNLL2	0.0985744	5.38877	1.35209e-06	0.00122233	1.35209e-06	0.001	0.0022525
chr12:51138862_rs1047912	DIP2B	-0.113099	-5.38772	1.35736e-06	0.00109277	1.35736e-06	0.001	0.0022525
chr2:28689170_rs12473843	SLC4A1AP	0.0864665	5.38401	1.37614e-06	0.00110102	1.37614e-06	0.001	0.0022525
chr12:27718777_rs10842934	PPFIBP1	-0.132149	-5.37737	1.41037e-06	0.00112942	1.41037e-06	0.001	0.0022525
chr4:177238852_rs78016478	SPCS3	-0.0746916	-5.36544	1.47403e-06	0.00114608	1.47403e-06	0.001	0.0022525
chr18:67536496_rs12969657	CD226	-0.243485	-5.3646	1.47865e-06	0.00174051	1.47865e-06	0.001	0.0022525
chr2:231278996_rs3754943	SP100	-0.0480575	-5.36084	1.49935e-06	0.0011771	1.49935e-06	0.001	0.0022525
chr17:33973662_rs11870475	AP2B1	-0.111168	-5.3523	1.54744e-06	0.00136892	1.54744e-06	0.001	0.0022525
chr17:72566351_rs1699597	CD300E	0.59637	5.34641	1.5815e-06	0.00139242	1.5815e-06	0.001	0.0022525
chr21:46328099_rs760462	ITGB2	-0.188085	-5.34426	1.59411e-06	0.000919448	1.59411e-06	0.001	0.0022525
chr6:38489195_rs55949948	GLO1	-0.0647606	-5.34381	1.5968e-06	0.000582911	1.5968e-06	0.001	0.0022525
chr12:109890080_rs4766601	KCTD10	-0.116588	-5.34147	1.61067e-06	0.00127147	1.61067e-06	0.001	0.0022525
chr22:39067975_rs9611004	SUN2	0.184952	5.33849	1.62848e-06	0.00148791	1.62848e-06	0.001	0.0022525
chr19:7709096_rs55959839	STXBP2	0.0856474	5.33676	1.63893e-06	0.00171032	1.63893e-06	0.001	0.0022525
chr10:75105664_rs7900383	FAM149B1	-0.170205	-5.33326	1.66022e-06	0.000982979	1.66022e-06	0.001	0.0022525
chr8:59328613_rs34406411	UBXN2B	0.118186	5.33209	1.66742e-06	0.00146496	1.66742e-06	0.001	0.0022525
chr5:95177641_rs6420125	GLRX	-0.160068	-5.3296	1.68285e-06	0.000974669	1.68285e-06	0.001	0.0022525
chr3:87136233_rs59402443	CGGBP1	-0.0788727	-5.32735	1.69687e-06	0.00100806	1.69687e-06	0.001	0.0022525
chr6:37886552_rs259692	ZFAND3	0.0574131	5.324	1.71795e-06	0.000621905	1.71795e-06	0.001	0.0022525
chr17:61963068_rs2727311	MAP3K3	-0.0749313	-5.32319	1.72314e-06	0.00148996	1.72314e-06	0.001	0.0022525
chr12:66462642_rs139422174	TMBIM4	0.158589	5.32198	1.73085e-06	0.00135151	1.73085e-06	0.001	0.0022525
chr22:31029004_rs12168004	SLC35E4	-0.287277	-5.31891	1.75058e-06	0.00156515	1.75058e-06	0.001	0.0022525
chr1:41421733_rs11580558	CTPS1	-0.196236	-5.31631	1.76742e-06	0.00105276	1.76742e-06	0.001	0.0022525
chr1:180140101_rs3753801	QSOX1	0.0732419	5.31357	1.78541e-06	0.00106182	1.78541e-06	0.001	0.0022525
chr14:50645974_rs7160591	METTL21D	0.258902	5.30915	1.81473e-06	0.00142314	1.81473e-06	0.001	0.0022525
chr15:91380471_rs73491646	FURIN	-0.304571	-5.30207	1.86273e-06	0.00118081	1.86273e-06	0.001	0.0022525
chr22:24931490_rs131460	GUCD1	-0.0636688	-5.30112	1.86931e-06	0.00165328	1.86931e-06	0.001	0.0022525
chr19:36264030_rs62112162	IGFLR1	0.129744	5.29668	1.90012e-06	0.00194578	1.90012e-06	0.001	0.0022525
chr12:57489648_rs4559	STAT6	0.0541438	5.29418	1.91769e-06	0.001477	1.91769e-06	0.001	0.0022525
chr15:45719187_rs17536527	GATM	0.293969	5.29102	1.94015e-06	0.00121986	1.94015e-06	0.001	0.0022525
chr1:158235258_rs406229	CD1E	-0.287405	-5.2903	1.9453e-06	0.00114509	1.9453e-06	0.001	0.0022525
chr4:514133_rs34872561	PIGG	-0.105287	-5.28747	1.96568e-06	0.00147115	1.96568e-06	0.001	0.0022525
chr19:41289397_rs12973666	EGLN2	-0.0632496	-5.28556	1.97963e-06	0.00201756	1.97963e-06	0.001	0.0022525
chr12:110272122_rs4357754	GLTP	0.100957	5.28211	2.00493e-06	0.00153078	2.00493e-06	0.001	0.0022525
chr11:32866069_rs7109323	QSER1	-0.0883738	-5.28117	2.01185e-06	0.00114631	2.01185e-06	0.001	0.0022525
chr16:70756181_rs62047970	VAC14	-0.11967	-5.27625	2.04864e-06	0.00177369	2.04864e-06	0.001	0.0022525
chr22:29381152_rs5762935	XBP1	-0.137952	-5.27313	2.07229e-06	0.00179313	2.07229e-06	0.001	0.0022525
chr7:139794309_rs12374864	LOC100134229	0.134501	5.26501	2.13518e-06	0.000958752	2.13518e-06	0.001	0.0022525
chr12:1727116_rs7953986	WNT5B	0.15383	5.26181	2.16049e-06	0.00164005	2.16049e-06	0.001	0.0022525
chr11:73570697_rs7124841	MRPL48	-0.277068	-5.25827	2.18879e-06	0.00122528	2.18879e-06	0.001	0.0022525
chr12:54069803_rs916134	ATP5G2	-0.0449606	-5.25803	2.19072e-06	0.00165942	2.19072e-06	0.001	0.0022525
chr6:31847196_rs570263	PRRC2A	-0.0448288	-5.25334	2.22881e-06	0.000777367	2.22881e-06	0.001	0.0022525
chr14:88473386_rs75703795	GALC	0.224279	5.23009	2.42761e-06	0.00178604	2.42761e-06	0.001	0.0022525
chr19:41900876_rs11668924	TMEM91	0.240607	5.22776	2.44847e-06	0.00238438	2.44847e-06	0.001	0.0022525
chr1:229461024_rs2282083	CCSAP	0.0772277	5.22756	2.4503e-06	0.00138765	2.4503e-06	0.001	0.0022525
chr17:62288583_rs3863513	ERN1	-0.0713256	-5.22414	2.48127e-06	0.00199986	2.48127e-06	0.001	0.0022525
chr13:75903368_rs8002811	TBC1D4	-0.252874	-5.21695	2.54758e-06	0.00282226	2.54758e-06	0.001	0.0022525
chr9:131912232_rs4836641	PPP2R4	0.0893136	5.21498	2.56603e-06	0.00193411	2.56603e-06	0.001	0.0022525
chr5:147286054_rs2250145	JAKMIP2	-0.655362	-5.21276	2.58706e-06	0.00140306	2.58706e-06	0.001	0.0022525
chr10:75539010_rs11000775	SEC24C	0.0489609	5.20269	2.68441e-06	0.00139626	2.68441e-06	0.001	0.0022525
chr3:52006405_rs11926611	RPL29	0.120525	5.20047	2.70629e-06	0.00150134	2.70629e-06	0.001	0.0022525
chr1:192769826_rs2179652	RGS2	-0.256107	-5.19623	2.7487e-06	0.00153092	2.7487e-06	0.001	0.0022525
chr17:38128714_rs3859191	PSMD3	0.0698863	5.19516	2.7595e-06	0.00216912	2.7595e-06	0.001	0.0022525
chr5:131436961_rs27437	P4HA2	-0.118589	-5.19505	2.76067e-06	0.00148577	2.76067e-06	0.001	0.0022525
chr13:24847311_rs3742176	SPATA13	-0.236041	-5.18796	2.8333e-06	0.00307502	2.8333e-06	0.001	0.0022525
chr16:87376_rs9939959	SNRNP25	0.229967	5.18078	2.90874e-06	0.00227537	2.90874e-06	0.001	0.0022525
chr16:3285507_rs116897782	ZNF200	-0.138348	-5.17295	2.99341e-06	0.00232103	2.99341e-06	0.001	0.0022525
chr18:12547783_rs12455536	SPIRE1	-0.0791265	-5.15713	3.17168e-06	0.0031209	3.17168e-06	0.001	0.0022525
chr18:39531139_rs1944967	PIK3C3	0.0620725	5.15134	3.23952e-06	0.00314675	3.23952e-06	0.001	0.0022525
chr10:48311583_rs117579758	AGAP9	0.459557	5.14837	3.27498e-06	0.00163601	3.27498e-06	0.001	0.0022525
chr6:29671030_rs115259031	HLA-G	-0.203065	-5.14288	3.34125e-06	0.00110307	3.34125e-06	0.001	0.0022525
chr10:75968316_rs10762582	VCL	0.0914815	5.13961	3.3814e-06	0.00167229	3.3814e-06	0.001	0.0022525
chr8:146282249_rs12682445	C8orf33	0.101604	5.13791	3.40251e-06	0.00264733	3.40251e-06	0.001	0.0022525
chr8:71651841_rs150992956	LACTB2	-0.114474	-5.13681	3.41622e-06	0.00265528	3.41622e-06	0.001	0.0022525
chr8:145027210_rs55786556	KIFC2	-0.0967653	-5.13481	3.44124e-06	0.00267082	3.44124e-06	0.001	0.0022525
chr3:51522676_rs62257549	RAD54L2	-0.111222	-5.13281	3.46653e-06	0.00182809	3.46653e-06	0.001	0.0022525
chr15:75400779_rs4381563	C15orf39	0.149874	5.12968	3.50627e-06	0.00195783	3.50627e-06	0.001	0.0022525
chr1:1225579_rs1977348	CCNL2	-0.174669	-5.12862	3.51985e-06	0.00187994	3.51985e-06	0.001	0.0022525
chr16:444608_rs7199565	NME4	-0.496281	-5.10435	3.84568e-06	0.00280744	3.84568e-06	0.001	0.0022525
chr1:145375103_rs11487264	NOTCH2NL	-0.657364	-5.08893	4.06802e-06	0.00210505	4.06802e-06	0.001	0.0022525
chr16:68039309_rs7204192	DPEP2	-0.265063	-5.07819	4.23015e-06	0.00296462	4.23015e-06	0.001	0.0022525
chr11:45846619_rs11038673	ARHGAP1	-0.0621241	-5.07797	4.2335e-06	0.00206449	4.2335e-06	0.001	0.0022525
chr4:52912589_rs2219576	SPATA18	-0.514416	-5.06938	4.36792e-06	0.00289708	4.36792e-06	0.001	0.0022525
chr6:31095007_rs6931464	HLA-L	-0.505525	-5.06378	4.45777e-06	0.00141497	4.45777e-06	0.001	0.0022525
chr10:105596007_rs67764572	SH3PXD2A	-0.188702	-5.05886	4.53826e-06	0.00212351	4.53826e-06	0.001	0.0022525
chr2:241806690_rs10182575	PDCD1	0.778089	5.05302	4.63552e-06	0.00280566	4.63552e-06	0.001	0.0022525
chr1:46016687_rs9147	PRDX1	-0.0679268	-5.02077	5.21105e-06	0.00260247	5.21105e-06	0.001	0.0022525
chr3:48659009_rs9834639	IMPDH2	0.12999	4.99613	5.69778e-06	0.00270218	5.69778e-06	0.001	0.0022525
chr4:79849623_rs3937772	LOC100505702	0.14336	4.9353	7.09778e-06	0.00428873	7.09778e-06	0.001	0.0022525
chr2:87132188_rs56146567	LOC285074	0.337112	4.88308	8.56496e-06	0.00447907	8.56496e-06	0.001	0.0022525
chr1:172960212_rs6688512	GAS5	0.303333	4.76947	1.28587e-05	0.00557874	1.28587e-05	0.001	0.0022525
chr12:12593479_rs7134787	DUSP16	0.275777	5.88094	2.14009e-07	0.000228272	2.14009e-07	0.002	0.00421857
chr2:170517406_rs72625206	FASTKD1	-0.421081	-5.86713	2.25486e-07	0.000247361	2.25486e-07	0.002	0.00421857
chr1:43139878_rs59665447	PPIH	-0.103121	-5.85712	2.34178e-07	0.00019434	2.34178e-07	0.002	0.00421857
chr2:37608263_rs113961586	PRKD3	-0.140407	-5.85102	2.39637e-07	0.000260672	2.39637e-07	0.002	0.00421857
chr3:69748725_rs6792940	TMF1	0.0471267	5.83059	2.58859e-07	0.000219727	2.58859e-07	0.002	0.00421857
chr2:238807450_rs72980138	RAMP1	-0.213956	-5.82327	2.66111e-07	0.000284899	2.66111e-07	0.002	0.00421857
chr8:11118527_rs9286062	MSRA	-0.117747	-5.79922	2.91392e-07	0.000367588	2.91392e-07	0.002	0.00421857
chr1:37868483_rs2745479	MTF1	0.141152	5.71302	4.0311e-07	0.000305878	4.0311e-07	0.002	0.00421857
chr19:53495920_rs329693	ZNF702P	1.17309	5.66159	4.88978e-07	0.000657344	4.88978e-07	0.002	0.00421857
chr5:53020821_rs3103602	NDUFS4	0.0991418	5.65388	5.03313e-07	0.000360057	5.03313e-07	0.002	0.00421857
chr5:179713822_rs3111517	MAPK9	-0.121076	-5.64038	5.2944e-07	0.000374935	5.2944e-07	0.002	0.00421857
chr2:113857297_rs12711754	IL1RN	-0.361929	-5.59156	6.3562e-07	0.00058527	6.3562e-07	0.002	0.00421857
chr20:18593066_rs6035089	DTD1	-0.120178	-5.56828	6.9341e-07	0.000572146	6.9341e-07	0.002	0.00421857
chr1:31384382_rs12563670	SDC3	0.41208	5.52995	8.00038e-07	0.000545871	8.00038e-07	0.002	0.00421857
chr19:16666101_rs2287869	EPS15L1	0.0742141	5.52298	8.21118e-07	0.00100051	8.21118e-07	0.002	0.00421857
chr7:76930080_rs113931965	GSAP	-0.147423	-5.51615	8.42283e-07	0.000446395	8.42283e-07	0.002	0.00421857
chr20:2906895_rs585040	PTPRA	0.0511457	5.51178	8.56109e-07	0.00067149	8.56109e-07	0.002	0.00421857
chr3:148872382_rs6803065	GYG1	0.0833375	5.50932	8.64011e-07	0.000591134	8.64011e-07	0.002	0.00421857
chr14:21959339_rs34765612	METTL3	-0.113396	-5.5075	8.69883e-07	0.000765135	8.69883e-07	0.002	0.00421857
chr8:22011135_rs73225821	REEP4	-0.138778	-5.50679	8.72176e-07	0.000849802	8.72176e-07	0.002	0.00421857
chr3:16363689_rs538180	DPH3	-0.0935234	-5.50024	8.93714e-07	0.000608272	8.93714e-07	0.002	0.00421857
chr16:11708473_rs145953388	LITAF	0.146164	5.49656	9.06052e-07	0.000915362	9.06052e-07	0.002	0.00421857
chr11:68440107_rs2012605	GAL	-1.81973	-5.4848	9.466e-07	0.000618884	9.466e-07	0.002	0.00421857
chr3:23777732_rs6550793	UBE2E1	0.0973378	5.48403	9.49309e-07	0.000626216	9.49309e-07	0.002	0.00421857
chr22:50963905_rs74479613	ODF3B	0.374479	5.47979	9.64408e-07	0.00103308	9.64408e-07	0.002	0.00421857
chr11:9066509_rs10769987	NRIP3	0.267378	5.47483	9.82353e-07	0.000639023	9.82353e-07	0.002	0.00421857
chr11:75118589_rs35378921	RPS3	0.108475	5.45619	1.05285e-06	0.000679134	1.05285e-06	0.002	0.00421857
chr17:76867892_rs4796801	TIMP2	-0.0852301	-5.44926	1.08031e-06	0.00101176	1.08031e-06	0.002	0.00421857
chr19:52742963_rs28563055	PPP2R1A	0.0393571	5.44037	1.1166e-06	0.00128443	1.1166e-06	0.002	0.00421857
chr2:109445946_rs6756939	RANBP2	0.0522116	5.4308	1.15697e-06	0.000961075	1.15697e-06	0.002	0.00421857
chr2:70152407_rs10185266	GMCL1	-0.0730295	-5.42941	1.16298e-06	0.000965599	1.16298e-06	0.002	0.00421857
chr17:3557495_rs486474	TAX1BP3	-0.111781	-5.42191	1.19579e-06	0.00109936	1.19579e-06	0.002	0.00421857
chr9:71726378_rs139388409	TJP2	0.469682	5.41701	1.21771e-06	0.00105241	1.21771e-06	0.002	0.00421857
chr10:73140004_rs10823725	SLC29A3	0.232088	5.41326	1.23478e-06	0.00076587	1.23478e-06	0.002	0.00421857
chr3:125449813_rs28802662	OSBPL11	-0.127791	-5.40592	1.26884e-06	0.000789971	1.26884e-06	0.002	0.00421857
chr3:140953898_rs2292400	ACPL2	0.235444	5.39832	1.30511e-06	0.000809719	1.30511e-06	0.002	0.00421857
chr4:25983686_rs6849822	SMIM20	0.197031	5.39611	1.3158e-06	0.00103659	1.3158e-06	0.002	0.00421857
chr10:114187787_rs8624	ZDHHC6	-0.0868348	-5.3947	1.3227e-06	0.000811677	1.3227e-06	0.002	0.00421857
chr1:220155683_rs2173403	EPRS	-0.0514144	-5.39237	1.33416e-06	0.000825982	1.33416e-06	0.002	0.00421857
chr19:34399068_rs10415855	PEPD	-0.203172	-5.38831	1.35442e-06	0.00147075	1.35442e-06	0.002	0.00421857
chr2:37438993_rs1137437	CEBPZ	0.0697324	5.36269	1.48911e-06	0.00117031	1.48911e-06	0.002	0.00421857
chr15:64428657_rs2290122	SNX1	0.0752574	5.36233	1.4911e-06	0.00097736	1.4911e-06	0.002	0.00421857
chr1:155108287_rs11264333	SLC50A1	0.104359	5.34588	1.58462e-06	0.00095857	1.58462e-06	0.002	0.00421857
chr10:28790817_rs2807736	WAC	0.0588446	5.34458	1.59223e-06	0.000952004	1.59223e-06	0.002	0.00421857
chr17:80045086_rs4485435	SLC16A3	-0.175617	-5.33032	1.67834e-06	0.00145981	1.67834e-06	0.002	0.00421857
chr11:122752714_rs4936757	CRTAM	-0.385186	-5.32924	1.68507e-06	0.000990131	1.68507e-06	0.002	0.00421857
chr6:31105147_rs149979052	TRIM40	1.0979	5.30402	1.84942e-06	0.000663624	1.84942e-06	0.002	0.00421857
chr15:40845597_rs6582	C15orf57	0.0968769	5.30166	1.86558e-06	0.00118221	1.86558e-06	0.002	0.00421857
chr19:54614270_rs16985367	TFPT	0.10377	5.27952	2.02413e-06	0.00205356	2.02413e-06	0.002	0.00421857
chr1:28717682_rs149674434	PHACTR4	0.215795	5.27025	2.09439e-06	0.00121959	2.09439e-06	0.002	0.00421857
chr14:74749177_rs7157201	ABCD4	0.0920036	5.24132	2.32951e-06	0.00174427	2.32951e-06	0.002	0.00421857
chr3:51354688_rs6445620	TEX264	0.116654	5.23879	2.35127e-06	0.00133302	2.35127e-06	0.002	0.00421857
chr10:18865534_rs4748491	ARL5B	-0.108769	-5.22996	2.42882e-06	0.0012798	2.42882e-06	0.002	0.00421857
chr2:70524142_rs14234	FAM136A	0.112285	5.22531	2.47063e-06	0.0017354	2.47063e-06	0.002	0.00421857
chr18:61034420_rs402348	KDSR	-0.162424	-5.22374	2.48488e-06	0.00259104	2.48488e-06	0.002	0.00421857
chr3:160098763_rs7618017	IFT80	-0.147196	-5.21568	2.55948e-06	0.00143394	2.55948e-06	0.002	0.00421857
chr7:140406640_rs10230071	NDUFB2	0.111479	5.20259	2.68542e-06	0.00116696	2.68542e-06	0.002	0.00421857
chr19:49508369_rs75952023	RUVBL2	0.114699	5.19477	2.76342e-06	0.00250056	2.76342e-06	0.002	0.00421857
chr3:142792759_rs7649225	U2SURP	0.0452099	5.18647	2.84884e-06	0.00157035	2.84884e-06	0.002	0.00421857
chr4:90757272_rs3756059	SNCA	0.270512	5.17696	2.94974e-06	0.00208398	2.94974e-06	0.002	0.00421857
chr11:71172783_rs2040323	DHCR7	-0.284741	-5.1639	3.09416e-06	0.00160184	3.09416e-06	0.002	0.00421857
chr12:121520157_rs2464844	ANAPC5	-0.0835496	-5.1613	3.12375e-06	0.00226577	3.12375e-06	0.002	0.00421857
chr2:111970614_rs76558138	BCL2L11	-0.198596	-5.14706	3.29066e-06	0.00216259	3.29066e-06	0.002	0.00421857
chr15:55555136_rs7496857	RAB27A	0.115452	5.12295	3.59349e-06	0.0019957	3.59349e-06	0.002	0.00421857
chr17:4904376_rs72838327	CAMTA2	-0.0863259	-5.11946	3.63953e-06	0.00271319	3.63953e-06	0.002	0.00421857
chr3:195874301_rs9841746	TFRC	0.16446	5.11641	3.68032e-06	0.0019209	3.68032e-06	0.002	0.00421857
chr3:196348103_rs6807839	LRRC33	-0.134855	-5.10649	3.81587e-06	0.00198164	3.81587e-06	0.002	0.00421857
chr8:87481300_rs1142528	CPNE3	0.0640165	5.09034	4.04711e-06	0.00301981	4.04711e-06	0.002	0.00421857
chr5:40290860_rs112932167	PTGER4	0.285883	5.08263	4.16227e-06	0.00213723	4.16227e-06	0.002	0.00421857
chr13:52181725_rs9535716	WDFY2	0.117621	5.05895	4.5368e-06	0.00434599	4.5368e-06	0.002	0.00421857
chr1:27046982_rs12729652	BC016143	0.147805	5.05089	4.67164e-06	0.00236615	4.67164e-06	0.002	0.00421857
chr11:207698_rs56186913	RIC8A	0.0585711	5.04261	4.81418e-06	0.00230483	4.81418e-06	0.002	0.00421857
chr11:34052493_rs4756099	NAT10	-0.0549012	-4.9985	5.64907e-06	0.0026157	5.64907e-06	0.002	0.00421857
chr15:64411495_rs6494464	FAM96A	-0.0628974	-4.9981	5.65715e-06	0.00278944	5.65715e-06	0.002	0.00421857
chr16:30332586_rs8054179	LOC595101	0.379838	4.98174	6.00211e-06	0.00388374	6.00211e-06	0.002	0.00421857
chr16:30603521_rs34699226	RNF40	-0.0608076	-4.98162	6.00482e-06	0.0038843	6.00482e-06	0.002	0.00421857
chr16:70639287_rs28582709	COG4	0.101059	4.97066	6.24752e-06	0.00398344	6.24752e-06	0.002	0.00421857
chr11:65742283_rs60109456	BANF1	-0.0433171	-4.9678	6.31229e-06	0.00286722	6.31229e-06	0.002	0.00421857
chr16:30332586_rs8054179	LOC613037	-0.224537	-4.96278	6.42796e-06	0.00406554	6.42796e-06	0.002	0.00421857
chr11:47121547_rs4576779	C11orf49	-0.173481	-4.81766	1.08275e-05	0.0043648	1.08275e-05	0.002	0.00421857
chr16:46738418_rs698416	VPS35	0.0576312	4.33538	5.86948e-05	0.0224942	5.86948e-05	0.002	0.00421857
chr22:24326813_rs398706	GSTT1	8.2858	6.00051	1.36034e-07	0.000226128	1.36034e-07	0.003	0.00601618
chr16:84213965_rs2278043	TAF1C	0.115323	5.88592	2.1002e-07	0.000282058	2.1002e-07	0.003	0.00601618
chr10:5915057_rs143569884	FBXO18	0.154162	5.70567	4.14395e-07	0.000292602	4.14395e-07	0.003	0.00601618
chr10:72423637_rs142199091	ADAMTS14	-0.572833	-5.69427	4.32524e-07	0.000304339	4.32524e-07	0.003	0.00601618
chr16:82197883_rs2303266	MPHOSPH6	0.134034	5.66792	4.77501e-07	0.000544015	4.77501e-07	0.003	0.00601618
chr18:61639311_rs28374149	SERPINB8	0.198151	5.64126	5.27704e-07	0.000763468	5.27704e-07	0.003	0.00601618
chr17:72565598_rs1719515	CD300C	0.275462	5.63092	5.48546e-07	0.000556615	5.48546e-07	0.003	0.00601618
chr4:3514539_rs1049574	LRPAP1	0.128085	5.55771	7.21334e-07	0.000614283	7.21334e-07	0.003	0.00601618
chr8:104419442_rs3133813	DCAF13	0.0936542	5.55498	7.28721e-07	0.000747923	7.28721e-07	0.003	0.00601618
chr19:55540785_rs186188333	NLRP2	-0.901045	-5.52736	8.07814e-07	0.000988071	8.07814e-07	0.003	0.00601618
chr12:2986911_rs4766002	TULP3	0.0943474	5.51689	8.39971e-07	0.000720598	8.39971e-07	0.003	0.00601618
chr9:111878956_rs74453341	TMEM245	-0.109641	-5.50846	8.66766e-07	0.00080483	8.66766e-07	0.003	0.00601618
chr3:38201847_rs61489189	ACAA1	0.152889	5.4614	1.03266e-06	0.000673568	1.03266e-06	0.003	0.00601618
chr1:160501993_rs6696595	SLAMF1	-0.182806	-5.44401	1.10162e-06	0.000706414	1.10162e-06	0.003	0.00601618
chr10:71194006_rs1072160	TSPAN15	-0.179039	-5.42847	1.16703e-06	0.000727948	1.16703e-06	0.003	0.00601618
chr11:68828929_rs896978	TPCN2	-0.132169	-5.38426	1.37486e-06	0.000836719	1.37486e-06	0.003	0.00601618
chr17:6917703_rs7338	ALOX12	-0.0786148	-5.3675	1.46286e-06	0.0013102	1.46286e-06	0.003	0.00601618
chr7:77168277_rs62476229	PTPN12	0.116093	5.34846	1.56959e-06	0.00073376	1.56959e-06	0.003	0.00601618
chr3:130477566_rs16845869	ATP2C1	0.181461	5.30849	1.81919e-06	0.00106785	1.81919e-06	0.003	0.00601618
chr11:5723190_rs75338262	TIMM10B	-0.304166	-5.30469	1.84485e-06	0.0010645	1.84485e-06	0.003	0.00601618
chr3:197492861_rs6809921	FYTTD1	0.0662236	5.29092	1.9409e-06	0.00112547	1.9409e-06	0.003	0.00601618
chr5:65040267_rs2591928	SGTB	-0.250031	-5.28624	1.97462e-06	0.00112059	1.97462e-06	0.003	0.00601618
chr11:75073534_rs4121885	ARRB1	0.103004	5.28194	2.00614e-06	0.00114366	2.00614e-06	0.003	0.00601618
chr1:111981733_rs12752970	C1orf162	0.260453	5.26958	2.09955e-06	0.00122184	2.09955e-06	0.003	0.00601618
chr2:71059763_rs10204437	TIA1	-0.0485854	-5.25375	2.22549e-06	0.0016064	2.22549e-06	0.003	0.00601618
chr7:2426868_rs1362137	EIF3B	0.0478739	5.24648	2.28578e-06	0.00101905	2.28578e-06	0.003	0.00601618
chr5:110580862_rs75503445	WDR36	0.141767	5.23995	2.34129e-06	0.00129127	2.34129e-06	0.003	0.00601618
chr2:132233063_rs12468676	MZT2A	-0.781748	-5.23446	2.38898e-06	0.00169592	2.38898e-06	0.003	0.00601618
chr16:1515415_rs12927645	CLCN7	0.102137	5.23186	2.4119e-06	0.00197748	2.4119e-06	0.003	0.00601618
chr2:122530091_rs74369368	MKI67IP	-0.1452	-5.22648	2.46005e-06	0.00173007	2.46005e-06	0.003	0.00601618
chr7:150289886_rs11761189	GIMAP2	-0.140534	-5.21915	2.52708e-06	0.0011071	2.52708e-06	0.003	0.00601618
chr5:150404311_rs8177433	GPX3	0.35314	5.21233	2.5911e-06	0.00140496	2.5911e-06	0.003	0.00601618
chr16:12657899_rs4780450	CPPED1	0.0991726	5.20958	2.61741e-06	0.00209863	2.61741e-06	0.003	0.00601618
chr20:23103867_rs844881	THBD	-0.341285	-5.19604	2.75067e-06	0.00179606	2.75067e-06	0.003	0.00601618
chr11:77517973_rs75713100	INTS4	-0.265705	-5.19532	2.75789e-06	0.00146726	2.75789e-06	0.003	0.00601618
chr7:133101721_rs17167070	EXOC4	-0.129849	-5.17105	3.01422e-06	0.00128179	3.01422e-06	0.003	0.00601618
chr9:37488009_rs10758432	POLR1E	0.161604	5.16775	3.05085e-06	0.00221804	3.05085e-06	0.003	0.00601618
chr11:70243641_rs12283131	PPFIA1	0.0598614	5.15663	3.1775e-06	0.00163604	3.1775e-06	0.003	0.00601618
chr17:74696030_rs10459894	MRPL38	0.0729768	5.13925	3.38593e-06	0.00255408	3.38593e-06	0.003	0.00601618
chr2:40642423_rs4952621	SLC8A1	0.357524	5.12344	3.5871e-06	0.00231507	3.5871e-06	0.003	0.00601618
chr5:72186960_rs62363389	FCHO2	-0.20688	-5.10449	3.84374e-06	0.00199134	3.84374e-06	0.003	0.00601618
chr11:321320_rs56228238	IFITM3	0.612533	5.09954	3.91374e-06	0.00193838	3.91374e-06	0.003	0.00601618
chr20:26214519_rs845790	PYGB	-0.0704581	-5.08645	4.10482e-06	0.00254712	4.10482e-06	0.003	0.00601618
chr15:55481111_rs8034882	RSL24D1	-0.0657705	-5.06584	4.42451e-06	0.00232659	4.42451e-06	0.003	0.00601618
chr15:73979239_rs74026250	CD276	0.147294	5.06497	4.43846e-06	0.0023307	4.43846e-06	0.003	0.00601618
chr16:71436399_rs7203957	IST1	-0.0419439	-5.05589	4.58747e-06	0.00316027	4.58747e-06	0.003	0.00601618
chr1:153927052_rs10908557	RAB13	-0.0601089	-5.05242	4.64568e-06	0.00235389	4.64568e-06	0.003	0.00601618
chr10:97613252_rs140575555	ENTPD1	-0.266766	-5.00486	5.52034e-06	0.00250986	5.52034e-06	0.003	0.00601618
chr5:141431759_rs252093	NDFIP1	-0.0843087	-5.00007	5.61697e-06	0.00278591	5.61697e-06	0.003	0.00601618
chr3:161162664_rs6762110	NMD3	0.133194	4.99756	5.66823e-06	0.00269176	5.66823e-06	0.003	0.00601618
chr1:8958110_rs6698322	ENO1	0.0563721	4.99058	5.81336e-06	0.00286168	5.81336e-06	0.003	0.00601618
chr9:140147152_rs28376526	NELFB	-0.0544775	-4.9823	5.99004e-06	0.00377295	5.99004e-06	0.003	0.00601618
chr12:120603085_rs59601514	RPLP0	-0.0583831	-4.98121	6.01376e-06	0.00393792	6.01376e-06	0.003	0.00601618
chr7:100336493_rs140939785	SLC12A9	-0.449955	-4.97723	6.10074e-06	0.00230699	6.10074e-06	0.003	0.00601618
chr16:89746902_rs2377233	CDK10	0.159965	4.97443	6.16282e-06	0.00394231	6.16282e-06	0.003	0.00601618
chr5:133916150_rs142844903	CAMLG	-0.153292	-4.91644	7.59687e-06	0.00356114	7.59687e-06	0.003	0.00601618
chr9:124061902_rs10760172	GSN	-0.0946969	-4.91	7.77487e-06	0.00463437	7.77487e-06	0.003	0.00601618
chr12:14694234_rs2287539	PLBD1	0.201862	4.88971	8.36355e-06	0.00519193	8.36355e-06	0.003	0.00601618
chr6:32573910_rs2647071	HLA-DRA	-0.151663	-4.87371	8.85814e-06	0.00254188	8.85814e-06	0.003	0.00601618
chr7:73509326_rs2237503	LIMK1	0.0873464	4.85502	9.47237e-06	0.00322819	9.47237e-06	0.003	0.00601618
chr1:150911494_rs35309985	CTSK	1.05482	4.82812	1.04299e-05	0.0046725	1.04299e-05	0.003	0.00601618
chr2:99185867_rs3754876	UNC50	0.0940053	4.82662	1.04862e-05	0.00514544	1.04862e-05	0.003	0.00601618
chr12:50663386_rs10783347	FMNL3	-0.0962368	-4.7916	1.18836e-05	0.00702307	1.18836e-05	0.003	0.00601618
chr8:33380685_rs7836942	MAK16	0.114545	4.77109	1.27849e-05	0.00684115	1.27849e-05	0.003	0.00601618
chr17:57510654_rs9901943	RNFT1	0.103905	4.72727	1.49408e-05	0.00814376	1.49408e-05	0.003	0.00601618
chr7:74140925_rs810366	NCF1	-0.397153	-4.65355	1.93947e-05	0.00572598	1.93947e-05	0.003	0.00601618
chr19:54779455_rs444004	MIR4752	-2.04632	-6.84782	5.27748e-09	2.0151e-05	5.27748e-09	0.004	0.00776095
chr14:65438968_rs184621947	AKAP5	1.28365	6.25837	5.09159e-08	6.41869e-05	5.09159e-08	0.004	0.00776095
chr16:84838975_rs4783067	OSGIN1	0.182514	5.46228	1.0293e-06	0.00100854	1.0293e-06	0.004	0.00776095
chr19:2085347_rs28408648	MOB3A	0.103846	5.46222	1.02952e-06	0.00120251	1.02952e-06	0.004	0.00776095
chr3:193362798_rs6771486	OPA1	0.0494235	5.39631	1.31486e-06	0.00081419	1.31486e-06	0.004	0.00776095
chr7:138741899_rs28526780	ZC3HAV1	-0.0814663	-5.36965	1.45126e-06	0.000688863	1.45126e-06	0.004	0.00776095
chr8:144767432_rs11777484	ZNF707	0.148793	5.35681	1.52188e-06	0.00135896	1.52188e-06	0.004	0.00776095
chr1:156147558_rs3738581	SEMA4A	-0.178988	-5.34493	1.59018e-06	0.00096128	1.59018e-06	0.004	0.00776095
chr1:200674027_rs7518347	CAMSAP2	0.0969819	5.3264	1.7028e-06	0.0010213	1.7028e-06	0.004	0.00776095
chr17:46072665_rs2597166	CDK5RAP3	-0.10281	-5.2707	2.09097e-06	0.00173749	2.09097e-06	0.004	0.00776095
chr20:2633296_rs6138678	NOP56	-0.0973049	-5.2639	2.1439e-06	0.00142801	2.1439e-06	0.004	0.00776095
chr1:184886737_rs66930146	FAM129A	-0.0985574	-5.2544	2.22017e-06	0.00127402	2.22017e-06	0.004	0.00776095
chr4:57833470_rs4865166	REST	-0.0515937	-5.23896	2.34977e-06	0.00171047	2.34977e-06	0.004	0.00776095
chr2:224813854_rs10933027	MRPL44	0.0643776	5.23873	2.3518e-06	0.00167403	2.3518e-06	0.004	0.00776095
chr19:4723670_rs2277732	DPP9	0.0897514	5.20584	2.65361e-06	0.00248599	2.65361e-06	0.004	0.00776095
chr3:150296895_rs1522351	SERP1	0.0544734	5.18427	2.87182e-06	0.00157867	2.87182e-06	0.004	0.00776095
chr3:39117308_rs6782794	WDR48	-0.0670568	-5.17889	2.92898e-06	0.00160486	2.92898e-06	0.004	0.00776095
chr18:74844698_rs10454722	MBP	-0.222015	-5.15013	3.25399e-06	0.00314675	3.25399e-06	0.004	0.00776095
chr6:83901889_rs74556255	DOPEY1	0.165961	5.14183	3.3542e-06	0.00110653	3.3542e-06	0.004	0.00776095
chr1:46670259_rs953823	POMGNT1	-0.091944	-5.13954	3.38229e-06	0.00182026	3.38229e-06	0.004	0.00776095
chr6:32945530_rs115125045	HLA-DMA	0.133308	5.12945	3.5092e-06	0.0011507	3.5092e-06	0.004	0.00776095
chr8:61206805_rs7006734	CA8	-1.21299	-5.12776	3.53095e-06	0.00272752	3.53095e-06	0.004	0.00776095
chr11:33072095_rs73487381	DEPDC7	-0.399893	-5.11991	3.63353e-06	0.00182797	3.63353e-06	0.004	0.00776095
chr15:41547692_rs7162503	CHP1	0.0506058	5.11664	3.6772e-06	0.00202554	3.6772e-06	0.004	0.00776095
chr3:158431070_rs1548013	RARRES1	-0.756334	-5.09166	4.0277e-06	0.00206552	4.0277e-06	0.004	0.00776095
chr15:78849541_rs4275821	PSMA4	-0.0607795	-5.07614	4.26184e-06	0.002263	4.26184e-06	0.004	0.00776095
chr22:20308279_rs61587716	DGCR6L	-0.201893	-5.05388	4.62116e-06	0.00342267	4.62116e-06	0.004	0.00776095
chr11:110498718_rs10082644	RDX	0.1176	5.03085	5.02407e-06	0.00238095	5.02407e-06	0.004	0.00776095
chr2:169069717_rs16855133	STK39	0.204249	5.02926	5.05314e-06	0.00297691	5.05314e-06	0.004	0.00776095
chr9:35670701_rs56755910	CCDC107	0.16436	5.01932	5.23862e-06	0.00345856	5.23862e-06	0.004	0.00776095
chr4:108668193_rs62313427	PAPSS1	-0.134463	-5.01208	5.37785e-06	0.00346555	5.37785e-06	0.004	0.00776095
chr12:102233373_rs10860796	GNPTAB	0.0937872	5.01158	5.38763e-06	0.0035648	5.38763e-06	0.004	0.00776095
chr11:45832295_rs7127456	SLC35C1	-0.115466	-4.98142	6.00918e-06	0.00274542	6.00918e-06	0.004	0.00776095
chr10:45445277_rs11239287	RASSF4	-0.196463	-4.96474	6.3824e-06	0.00282375	6.3824e-06	0.004	0.00776095
chr3:3102867_rs3913308	CRBN	-0.0787399	-4.95618	6.58291e-06	0.00302649	6.58291e-06	0.004	0.00776095
chr3:158514360_rs6802315	LXN	-0.145871	-4.95153	6.69424e-06	0.00307063	6.69424e-06	0.004	0.00776095
chr12:120480604_rs4767873	RAB35	-0.0490612	-4.9384	7.01905e-06	0.00447311	7.01905e-06	0.004	0.00776095
chr14:50102653_rs113170157	MGAT2	-0.0476443	-4.93064	7.2181e-06	0.00423756	7.2181e-06	0.004	0.00776095
chr15:42458347_rs663454	VPS39	-0.0619584	-4.90599	7.88809e-06	0.00361593	7.88809e-06	0.004	0.00776095
chr4:129992337_rs1699379	C4orf33	0.164051	4.89616	8.17177e-06	0.00479465	8.17177e-06	0.004	0.00776095
chr6:32866992_rs116114705	PFDN6	-0.0915175	-4.89258	8.27774e-06	0.00240039	8.27774e-06	0.004	0.00776095
chr14:54900521_rs7157721	GMFB	-0.0576999	-4.84078	9.96798e-06	0.00533705	9.96798e-06	0.004	0.00776095
chr20:25038484_rs66817095	ACSS1	-0.250624	-4.82878	1.04054e-05	0.00570218	1.04054e-05	0.004	0.00776095
chr10:74251138_rs10823929	MCU	-0.0751766	-4.80507	1.13259e-05	0.00453955	1.13259e-05	0.004	0.00776095
chr7:75147801_rs794375	GTF2I	0.0635252	4.74092	1.42337e-05	0.00449798	1.42337e-05	0.004	0.00776095
chr17:63595359_rs1017022	CEP112	-0.426249	-5.94843	1.65747e-07	0.000194989	1.65747e-07	0.005	0.00942226
chr11:87908346_rs302647	RAB38	-0.56368	-5.40658	1.26572e-06	0.000786728	1.26572e-06	0.005	0.00942226
chr9:4857802_rs1576065	AK3	-0.1243	-5.35195	1.54945e-06	0.00127308	1.54945e-06	0.005	0.00942226
chr14:24527672_rs7146599	PCK2	-0.177662	-5.33995	1.61969e-06	0.00130531	1.61969e-06	0.005	0.00942226
chr12:30946254_rs11051087	CAPRIN2	0.197753	5.29067	1.94268e-06	0.00149298	1.94268e-06	0.005	0.00942226
chr12:124950060_rs3782281	NCOR2	-0.0951296	-5.25594	2.2076e-06	0.00167061	2.2076e-06	0.005	0.00942226
chr11:124947149_rs12276567	SLC37A2	0.213277	5.22545	2.46935e-06	0.00134184	2.46935e-06	0.005	0.00942226
chr16:23601535_rs426745	GGA2	0.134729	5.21786	2.53913e-06	0.00204849	2.53913e-06	0.005	0.00942226
chr8:16414496_rs17583220	MSR1	0.723012	5.19675	2.74348e-06	0.00220744	2.74348e-06	0.005	0.00942226
chr1:110186563_rs12745189	GSTM2	0.343898	5.18942	2.81818e-06	0.00156312	2.81818e-06	0.005	0.00942226
chr8:104036135_rs2048549	ATP6V1C1	-0.0770007	-5.18398	2.87493e-06	0.00228458	2.87493e-06	0.005	0.00942226
chr17:9339529_rs12947013	STX8	-0.153857	-5.17822	2.93619e-06	0.00227796	2.93619e-06	0.005	0.00942226
chr13:114519894_rs12860172	GAS6-AS1	-0.186736	-5.14173	3.35531e-06	0.00348086	3.35531e-06	0.005	0.00942226
chr2:170738705_rs62641569	UBR3	0.0608308	5.13522	3.43617e-06	0.00223434	3.43617e-06	0.005	0.00942226
chr12:27378871_rs10842880	STK38L	-0.173583	-5.13102	3.48917e-06	0.0024915	3.48917e-06	0.005	0.00942226
chr13:95253920_rs3897473	GPR180	-0.16595	-5.12279	3.59555e-06	0.00367403	3.59555e-06	0.005	0.00942226
chr2:71582253_rs13035834	CD207	0.63816	5.11348	3.71987e-06	0.00237121	3.71987e-06	0.005	0.00942226
chr5:10680547_rs9857	DAP	0.119123	5.10848	3.78829e-06	0.00196652	3.78829e-06	0.005	0.00942226
chr7:33045298_rs11541013	AVL9	0.0725251	5.08468	4.13146e-06	0.00167139	4.13146e-06	0.005	0.00942226
chr19:35273574_rs12610430	ZNF181	-0.143724	-5.08407	4.14058e-06	0.00344915	4.14058e-06	0.005	0.00942226
chr14:103992096_rs11160752	MARK3	0.0640566	5.06969	4.36293e-06	0.00288101	4.36293e-06	0.005	0.00942226
chr2:144172700_rs2381435	ARHGAP15	-0.215501	-5.0382	4.89184e-06	0.00291868	4.89184e-06	0.005	0.00942226
chr19:20864387_rs11670264	ZNF626	-0.435977	-5.01977	5.23009e-06	0.00416825	5.23009e-06	0.005	0.00942226
chr17:74952123_rs112834778	UBALD2	-0.188608	-5.00831	5.45191e-06	0.00374982	5.45191e-06	0.005	0.00942226
chr3:27691096_rs7621812	SLC4A7	-0.126503	-5.00277	5.56234e-06	0.00265248	5.56234e-06	0.005	0.00942226
chr1:207491489_rs891376	CD55	-0.162879	-5.0007	5.60421e-06	0.00277349	5.60421e-06	0.005	0.00942226
chr10:94899803_rs4918430	KIF11	0.133754	4.99768	5.66591e-06	0.00256353	5.66591e-06	0.005	0.00942226
chr20:47510491_rs17445665	ARFGEF2	0.0637132	4.98957	5.83456e-06	0.00345986	5.83456e-06	0.005	0.00942226
chr2:101116571_rs876143	PDCL3	-0.173523	-4.96918	6.28093e-06	0.00352312	6.28093e-06	0.005	0.00942226
chr16:15170906_rs2966184	NPIP	0.147618	4.96664	6.33886e-06	0.00402702	6.33886e-06	0.005	0.00942226
chr20:43514337_rs6031849	YWHAB	0.0435673	4.95787	6.54291e-06	0.00380441	6.54291e-06	0.005	0.00942226
chr20:30621590_rs6058513	HCK	0.0663308	4.9515	6.69494e-06	0.00387801	6.69494e-06	0.005	0.00942226
chr1:29191563_rs204074	EPB41	0.142175	4.93533	7.09702e-06	0.00339323	7.09702e-06	0.005	0.00942226
chr3:42028722_rs794899	TRAK1	-0.0839704	-4.93086	7.21225e-06	0.00327819	7.21225e-06	0.005	0.00942226
chr6:18202564_rs183341	KDM1B	0.113528	4.89803	8.11697e-06	0.00235967	8.11697e-06	0.005	0.00942226
chr17:40669323_rs8070783	MLX	-0.0959457	-4.88878	8.39137e-06	0.00521899	8.39137e-06	0.005	0.00942226
chr11:67813573_rs12273861	TCIRG1	-0.087702	-4.85939	9.32497e-06	0.00385539	9.32497e-06	0.005	0.00942226
chr3:129716331_rs1849644	CNBP	-0.124952	-4.83545	1.01601e-05	0.00439608	1.01601e-05	0.005	0.00942226
chr17:29587917_rs4795587	EVI2A	0.0895764	4.76459	1.30841e-05	0.00736982	1.30841e-05	0.005	0.00942226
chr12:49930806_rs73301259	TMBIM6	-0.0555291	-4.67429	1.80248e-05	0.00997379	1.80248e-05	0.005	0.00942226
chr6:29642194_rs2747419	HLA-F-AS1	-2.85118	-4.26243	7.5308e-05	0.015387	7.5308e-05	0.005	0.00942226
chr7:107150137_rs190401330	COG5	-0.133235	-5.36819	1.45911e-06	0.000692374	1.45911e-06	0.006	0.0109683
chr2:235332456_rs10184515	ARL4C	0.275128	5.35744	1.51831e-06	0.00118795	1.51831e-06	0.006	0.0109683
chr7:80378319_rs2272351	CD36	-0.712618	-5.27519	2.05669e-06	0.000927047	2.05669e-06	0.006	0.0109683
chr16:80486056_rs9939856	CMIP	0.0720325	5.22289	2.49267e-06	0.00202489	2.49267e-06	0.006	0.0109683
chr17:78076592_rs12450199	GAA	0.159932	5.1923	2.78859e-06	0.00218731	2.78859e-06	0.006	0.0109683
chr5:179748207_rs7720626	RUFY1	0.0922909	5.17636	2.95621e-06	0.00157089	2.95621e-06	0.006	0.0109683
chr21:45152500_rs2276528	PDXK	-0.0868608	-5.15982	3.14066e-06	0.00162387	3.14066e-06	0.006	0.0109683
chr18:21577012_rs4800527	NPC1	-0.162632	-5.1557	3.18839e-06	0.00313069	3.18839e-06	0.006	0.0109683
chr1:231897629_rs1538976	TTC13	0.144115	5.14451	3.32148e-06	0.00179348	3.32148e-06	0.006	0.0109683
chr12:131656965_rs7300808	STX2	-0.23403	-5.14088	3.36579e-06	0.00241539	3.36579e-06	0.006	0.0109683
chr13:113121595_rs4907719	PCID2	-0.147641	-5.13923	3.38609e-06	0.00350569	3.38609e-06	0.006	0.0109683
chr17:1366413_rs7208411	CRK	-0.0800089	-5.12997	3.50259e-06	0.00262843	3.50259e-06	0.006	0.0109683
chr4:187120361_rs13146537	CYP4V2	0.270015	5.12761	3.53289e-06	0.00242593	3.53289e-06	0.006	0.0109683
chr2:36710779_rs11692416	FEZ2	-0.0882859	-5.11075	3.75704e-06	0.00238954	3.75704e-06	0.006	0.0109683
chr13:96625356_rs12877250	DNAJC3	0.0842742	5.10105	3.89228e-06	0.00388367	3.89228e-06	0.006	0.0109683
chr4:169827618_rs6819031	CBR4	-0.177881	-5.08505	4.1259e-06	0.00277152	4.1259e-06	0.006	0.0109683
chr2:68477248_rs4671888	PNO1	-0.118957	-5.07361	4.30115e-06	0.00264359	4.30115e-06	0.006	0.0109683
chr1:227060342_rs1297990	PSEN2	0.122813	5.05009	4.68523e-06	0.00237236	4.68523e-06	0.006	0.0109683
chr6:33073902_rs114151875	HLA-DPB2	-5.26775	-5.04499	4.77276e-06	0.00150058	4.77276e-06	0.006	0.0109683
chr15:50361890_rs10152376	ATP8B4	0.216473	5.04154	4.83297e-06	0.00247988	4.83297e-06	0.006	0.0109683
chr12:104889619_rs7137398	CHST11	-0.0990791	-5.03877	4.88177e-06	0.00326215	4.88177e-06	0.006	0.0109683
chr1:31066494_rs672798	PUM1	-0.0524175	-5.03468	4.95482e-06	0.00248958	4.95482e-06	0.006	0.0109683
chr13:73298888_rs71427603	MZT1	-0.172747	-5.02547	5.12302e-06	0.00478282	5.12302e-06	0.006	0.0109683
chr2:167247922_rs10202916	SCN9A	0.260239	5.02262	5.17624e-06	0.00303683	5.17624e-06	0.006	0.0109683
chr19:47446691_rs311370	AP2S1	0.037684	5.01664	5.28982e-06	0.0042052	5.28982e-06	0.006	0.0109683
chr11:17237481_rs12226898	RPS13	-0.0700667	-5.00394	5.5389e-06	0.00257986	5.5389e-06	0.006	0.0109683
chr10:81037800_rs1250538	ZMIZ1	-0.126204	-4.98484	5.93533e-06	0.00266405	5.93533e-06	0.006	0.0109683
chr17:26977343_rs57577420	RAB34	0.169772	4.98388	5.95587e-06	0.00402117	5.95587e-06	0.006	0.0109683
chr4:139092719_rs13120371	SLC7A11	0.248624	4.9829	5.97707e-06	0.0037875	5.97707e-06	0.006	0.0109683
chr12:100570551_rs7968340	UHRF1BP1L	-0.0712609	-4.9187	7.53536e-06	0.00475617	7.53536e-06	0.006	0.0109683
chr11:2328795_rs2237862	TSPAN32	-0.432835	-4.91393	7.66576e-06	0.00334821	7.66576e-06	0.006	0.0109683
chr5:70927580_rs6886804	MCCC2	-0.113874	-4.90045	8.04684e-06	0.00373577	8.04684e-06	0.006	0.0109683
chr1:78460935_rs7514180	DNAJB4	-0.138033	-4.85377	9.51461e-06	0.00432464	9.51461e-06	0.006	0.0109683
chr12:123618942_rs1727317	CDK2AP1	-0.142605	-4.84071	9.97054e-06	0.00604254	9.97054e-06	0.006	0.0109683
chr3:112064266_rs60497880	CD200	0.943492	4.82343	1.06065e-05	0.0045504	1.06065e-05	0.006	0.0109683
chr12:58223937_rs10877022	CYP27B1	-0.303486	-4.80834	1.11942e-05	0.00668554	1.11942e-05	0.006	0.0109683
chr1:176116366_rs10913144	RFWD2	-0.0547957	-4.80729	1.12363e-05	0.00497429	1.12363e-05	0.006	0.0109683
chr8:146017032_rs2954657	PPP1R16A	-0.134471	-4.80246	1.14316e-05	0.00632024	1.14316e-05	0.006	0.0109683
chr1:179055261_rs9659206	TOR3A	0.104686	4.78558	1.21415e-05	0.00531314	1.21415e-05	0.006	0.0109683
chr4:108400113_rs55658115	DKK2	-1.75253	-4.76855	1.29009e-05	0.00691741	1.29009e-05	0.006	0.0109683
chr3:119526372_rs1464602	GSK3B	0.0530408	4.76583	1.30264e-05	0.00540676	1.30264e-05	0.006	0.0109683
chr14:67966599_rs10873201	PLEKHH1	-0.522574	-4.76163	1.32226e-05	0.00665509	1.32226e-05	0.006	0.0109683
chr8:33430579_rs6468177	RNF122	0.258312	4.7296	1.48173e-05	0.00765366	1.48173e-05	0.006	0.0109683
chr7:98891438_rs9969217	ATP5J2-PTCD1	0.085691	4.7285	1.48754e-05	0.0046219	1.48754e-05	0.006	0.0109683
chr22:24326813_rs398706	GSTTP2	6.72516	5.57015	6.88563e-07	0.000798166	6.88563e-07	0.007	0.0124904
chr17:4770197_rs62073635	KIF1C	0.107558	5.21736	2.54374e-06	0.00204026	2.54374e-06	0.007	0.0124904
chr7:6884764_rs4476910	CCZ1B	0.558374	5.14542	3.31048e-06	0.00138391	3.31048e-06	0.007	0.0124904
chr21:44997322_rs1003280	RRP1B	-0.0951307	-5.11078	3.75659e-06	0.00188167	3.75659e-06	0.007	0.0124904
chr19:16193785_rs3786573	TPM4	-0.0660899	-5.09703	3.94967e-06	0.00332555	3.94967e-06	0.007	0.0124904
chr19:17339112_rs14129	OCEL1	0.211211	5.05897	4.53646e-06	0.00370929	4.53646e-06	0.007	0.0124904
chr19:54566901_rs662850	OSCAR	0.163892	5.05691	4.57042e-06	0.0037321	4.57042e-06	0.007	0.0124904
chr1:203510228_rs6677511	ATP2B4	0.275776	5.04703	4.73752e-06	0.00239544	4.73752e-06	0.007	0.0124904
chr19:49220323_rs11672900	NOSIP	-0.0832254	-5.04595	4.75618e-06	0.00385663	4.75618e-06	0.007	0.0124904
chr1:63034363_rs7555577	DOCK7	-0.0709026	-5.04382	4.79314e-06	0.00242105	4.79314e-06	0.007	0.0124904
chr9:115979279_rs7855694	FKBP15	-0.112549	-5.01566	5.30863e-06	0.00348024	5.30863e-06	0.007	0.0124904
chr12:69162243_rs12321570	RAP1B	0.105053	5.00665	5.48475e-06	0.00362602	5.48475e-06	0.007	0.0124904
chr6:109880600_rs6910388	C6orf185	1.25784	5.00031	5.6122e-06	0.00172881	5.6122e-06	0.007	0.0124904
chr1:226088280_rs1237433	TMEM63A	0.10167	4.99546	5.71159e-06	0.0028196	5.71159e-06	0.007	0.0124904
chr17:45169760_rs4520895	CDC27	0.097266	4.98366	5.96061e-06	0.00402355	5.96061e-06	0.007	0.0124904
chr7:28243186_rs10263934	HIBADH	0.238052	4.94695	6.80575e-06	0.0025057	6.80575e-06	0.007	0.0124904
chr1:205116635_rs11367	RBBP5	-0.0946077	-4.91587	7.61255e-06	0.0035945	7.61255e-06	0.007	0.0124904
chr1:75140269_rs699800	C1orf173	-0.711093	-4.91151	7.73285e-06	0.00363689	7.73285e-06	0.007	0.0124904
chr22:38255199_rs11913731	EIF3L	-0.126858	-4.90921	7.79716e-06	0.00506581	7.79716e-06	0.007	0.0124904
chr6:31587561_rs115616488	BAG6	-0.0718105	-4.88687	8.44917e-06	0.00244322	8.44917e-06	0.007	0.0124904
chr2:85743357_rs10198001	VAMP8	-0.0650531	-4.8808	8.63539e-06	0.00449604	8.63539e-06	0.007	0.0124904
chr12:47973661_rs1232981	PCED1B-AS1	-0.518209	-4.87419	8.84277e-06	0.00544562	8.84277e-06	0.007	0.0124904
chr11:9594690_rs6486433	WEE1	-0.181789	-4.87054	8.9595e-06	0.00373057	8.9595e-06	0.007	0.0124904
chr3:120430134_rs12489104	NDUFB4	-0.0775629	-4.85827	9.36258e-06	0.00411145	9.36258e-06	0.007	0.0124904
chr8:101184166_rs2514696	SPAG1	0.341542	4.85769	9.38212e-06	0.00541634	9.38212e-06	0.007	0.0124904
chr5:108828346_rs6594375	MAN2A1	-0.0786508	-4.84744	9.73298e-06	0.00441781	9.73298e-06	0.007	0.0124904
chr17:56417002_rs1985749	SUPT4H1	0.0430521	4.83547	1.01592e-05	0.00605986	1.01592e-05	0.007	0.0124904
chr6:114327759_rs6568822	BC042098	-0.191903	-4.81879	1.07841e-05	0.0030192	1.07841e-05	0.007	0.0124904
chr2:24346029_rs74883678	SF3B14	-0.0993175	-4.77428	1.26406e-05	0.00594115	1.26406e-05	0.007	0.0124904
chr12:64836920_rs11175393	GNS	0.0953973	4.75326	1.36226e-05	0.0078686	1.36226e-05	0.007	0.0124904
chr9:130340944_rs4266744	FAM129B	-0.0656508	-4.74622	1.39677e-05	0.00744614	1.39677e-05	0.007	0.0124904
chr22:31020067_rs190673036	TCN2	-0.7366	-4.67489	1.79868e-05	0.0101222	1.79868e-05	0.007	0.0124904
chr22:40915718_rs5757976	MKL1	-0.0639377	-4.58989	2.42657e-05	0.0129024	2.42657e-05	0.007	0.0124904
chr5:137775581_rs982085	KDM3B	-0.0276886	-4.51176	3.18928e-05	0.0110136	3.18928e-05	0.007	0.0124904
chr3:50575312_rs12491425	C3orf18	-0.221531	-4.47483	3.62675e-05	0.0113109	3.62675e-05	0.007	0.0124904
chr3:48259631_rs11130161	ZNF589	-0.218958	-4.22526	8.54453e-05	0.0219676	8.54453e-05	0.007	0.0124904
chr6:110735630_rs3757351	DDO	-0.79702	-5.4758	9.78825e-07	0.000377169	9.78825e-07	0.008	0.0140234
chr3:157703588_rs78153378	RSRC1	-0.115986	-5.2033	2.67841e-06	0.00148793	2.67841e-06	0.008	0.0140234
chr20:62149840_rs2145166	PPDPF	0.353209	5.18633	2.85029e-06	0.0018491	2.85029e-06	0.008	0.0140234
chr19:54612628_rs254262	NDUFA3	0.108754	5.14837	3.27491e-06	0.00284947	3.27491e-06	0.008	0.0140234
chr12:4867141_rs2359467	CCND2	-0.324612	-5.13796	3.40185e-06	0.00243708	3.40185e-06	0.008	0.0140234
chr1:101656441_rs76841451	S1PR1	0.784173	5.09813	3.9339e-06	0.00204783	3.9339e-06	0.008	0.0140234
chr6:31976549_rs116303574	SKIV2L	-0.0724047	-5.09317	4.00558e-06	0.0012879	4.00558e-06	0.008	0.0140234
chr2:58240951_rs113151102	VRK2	-0.0985819	-5.09126	4.03363e-06	0.002522	4.03363e-06	0.008	0.0140234
chr8:23112662_rs3736025	CHMP7	0.0511456	4.92151	7.45948e-06	0.00458876	7.45948e-06	0.008	0.0140234
chr6:44081987_rs4711767	MRPL14	0.089525	4.89834	8.10797e-06	0.00235762	8.10797e-06	0.008	0.0140234
chr2:55271965_rs7584386	RTN4	-0.0595163	-4.89056	8.33798e-06	0.00438836	8.33798e-06	0.008	0.0140234
chr5:178485203_rs4701029	SQSTM1	0.174175	4.8865	8.46056e-06	0.00389936	8.46056e-06	0.008	0.0140234
chr11:60232325_rs4939364	MS4A2	0.646346	4.88115	8.62474e-06	0.00363946	8.62474e-06	0.008	0.0140234
chr1:184034175_rs12402790	TSEN15	-0.108798	-4.879	8.69144e-06	0.00400515	8.69144e-06	0.008	0.0140234
chr1:154766100_rs11577297	BC041646	-0.399181	-4.87088	8.9485e-06	0.0041049	8.9485e-06	0.008	0.0140234
chr7:94927495_rs3735590	PDK4	0.742752	4.85122	9.60216e-06	0.00325847	9.60216e-06	0.008	0.0140234
chr9:5510644_rs16923189	PDCD1LG2	-0.108709	-4.85011	9.64049e-06	0.00555058	9.64049e-06	0.008	0.0140234
chr11:134112662_rs2282562	VPS26B	0.0746367	4.76101	1.32521e-05	0.00520061	1.32521e-05	0.008	0.0140234
chr9:74257162_rs2871401	TMEM2	-0.145542	-4.75259	1.36549e-05	0.00731101	1.36549e-05	0.008	0.0140234
chr12:57975953_rs10783834	PIP4K2C	0.0770334	4.72947	1.48243e-05	0.00845623	1.48243e-05	0.008	0.0140234
chr10:102427797_rs4919478	CUTC	-0.0789682	-4.70464	1.6189e-05	0.0060795	1.6189e-05	0.008	0.0140234
chr3:120239827_rs7641178	FSTL1	0.43306	4.68802	1.71707e-05	0.00665111	1.71707e-05	0.008	0.0140234
chr5:180064494_rs67989055	CNOT6	-0.0538609	-4.68401	1.7416e-05	0.00684458	1.7416e-05	0.008	0.0140234
chr12:58291919_rs61935768	DDIT3	-0.160347	-4.64762	1.98048e-05	0.010825	1.98048e-05	0.008	0.0140234
chr2:63506806_rs11685910	MDH1	0.0531083	4.61433	2.22686e-05	0.00912861	2.22686e-05	0.008	0.0140234
chr2:88323791_rs17350487	KRCC1	-0.104572	-4.52733	3.02068e-05	0.0114565	3.02068e-05	0.008	0.0140234
chr5:138461547_rs11951084	SIL1	0.0687067	4.5039	3.27792e-05	0.0112475	3.27792e-05	0.008	0.0140234
chr17:4544641_rs11568075	ALOX15	0.727384	5.16465	3.08563e-06	0.00237356	3.08563e-06	0.009	0.0154933
chr17:79266355_rs78635201	SLC38A10	-0.1011	-5.08039	4.19634e-06	0.00305325	4.19634e-06	0.009	0.0154933
chr17:79031825_rs9898347	BAIAP2-AS1	0.0963659	5.06017	4.51666e-06	0.00322251	4.51666e-06	0.009	0.0154933
chr22:23922552_rs9624216	IGLL1	0.926205	5.0311	5.0196e-06	0.00366264	5.0196e-06	0.009	0.0154933
chr4:25979181_rs7375628	SEL1L3	0.394162	5.0213	5.20115e-06	0.00335972	5.20115e-06	0.009	0.0154933
chr8:133873062_rs2223131	PHF20L1	-0.0695596	-5.01812	5.26152e-06	0.00361696	5.26152e-06	0.009	0.0154933
chr1:167872882_rs7542791	MPC2	0.154311	4.99703	5.67915e-06	0.00280566	5.67915e-06	0.009	0.0154933
chr4:112798060_rs56020821	AP1AR	-0.121168	-4.97215	6.21393e-06	0.00390257	6.21393e-06	0.009	0.0154933
chr4:170678993_rs11540095	C4orf27	0.157026	4.93829	7.02185e-06	0.00426161	7.02185e-06	0.009	0.0154933
chr4:169345005_rs62334147	DDX60L	0.300747	4.88337	8.5562e-06	0.00495087	8.5562e-06	0.009	0.0154933
chr3:156861460_rs4680340	CCNL1	-0.0693217	-4.85567	9.45026e-06	0.004142	9.45026e-06	0.009	0.0154933
chr12:83056336_rs4882520	CCDC59	0.124925	4.85528	9.46347e-06	0.00578174	9.46347e-06	0.009	0.0154933
chr12:98987445_rs28372744	SLC25A3	-0.0691284	-4.83002	1.03593e-05	0.00624345	1.03593e-05	0.009	0.0154933
chr7:112105754_rs3807213	IFRD1	-0.107899	-4.81645	1.08745e-05	0.00361289	1.08745e-05	0.009	0.0154933
chr22:31939973_rs5753684	PISD	-0.0976642	-4.81411	1.09657e-05	0.00672204	1.09657e-05	0.009	0.0154933
chr19:39459174_rs10409200	KCNK6	-0.095142	-4.80221	1.1442e-05	0.00797489	1.1442e-05	0.009	0.0154933
chr20:44570683_rs7267295	PLTP	-1.18051	-4.78705	1.20779e-05	0.00639068	1.20779e-05	0.009	0.0154933
chr2:219160749_rs56344368	TMBIM1	-0.0642092	-4.77615	1.25563e-05	0.00591436	1.25563e-05	0.009	0.0154933
chr11:75100430_rs578101	SPCS2	0.0563814	4.76343	1.31384e-05	0.00516478	1.31384e-05	0.009	0.0154933
chr4:78625435_rs11097900	CNOT6L	-0.0731202	-4.75084	1.37403e-05	0.00730725	1.37403e-05	0.009	0.0154933
chr3:58237003_rs4681832	ABHD6	0.0909907	4.73763	1.4401e-05	0.00580721	1.4401e-05	0.009	0.0154933
chr21:17095654_rs7283764	USP25	-0.0760242	-4.73131	1.47278e-05	0.00586723	1.47278e-05	0.009	0.0154933
chr16:67013043_rs8064086	CBFB	0.127622	4.61735	2.20335e-05	0.0106074	2.20335e-05	0.009	0.0154933
chr15:43930606_rs35028925	ELL3	0.0820014	4.57542	2.55293e-05	0.00886734	2.55293e-05	0.009	0.0154933
chr3:52407933_rs13076890	BAP1	-0.0594332	-4.51985	3.10062e-05	0.0100446	3.10062e-05	0.009	0.0154933
chr2:86035852_rs6726470	RMND5A	0.0746696	4.5168	3.13374e-05	0.0117192	3.13374e-05	0.009	0.0154933
chr2:74501125_rs6546900	MTHFD2	0.0708924	4.49215	3.41478e-05	0.0124584	3.41478e-05	0.009	0.0154933
chr8:146028017_rs2958526	RPL8	-0.139445	-4.46633	3.73546e-05	0.0151098	3.73546e-05	0.009	0.0154933
chr5:178466194_rs4701027	C5orf45	0.326149	5.14346	3.33419e-06	0.00175351	3.33419e-06	0.01	0.0169648
chr4:1191699_rs111340627	UVSSA	-0.211428	-5.0713	4.33753e-06	0.00288312	4.33753e-06	0.01	0.0169648
chr8:22388330_rs2461485	SORBS3	-0.0978705	-5.06047	4.51181e-06	0.00324399	4.51181e-06	0.01	0.0169648
chr17:1618262_rs11078596	WDR81	0.0796644	5.05543	4.59514e-06	0.00326722	4.59514e-06	0.01	0.0169648
chr11:1774136_rs8839	MOB2	-0.18738	-4.97264	6.20288e-06	0.00282392	6.20288e-06	0.01	0.0169648
chr9:33018423_rs7043066	SMU1	0.0685336	4.9172	7.576e-06	0.00454518	7.576e-06	0.01	0.0169648
chr10:90661698_rs2304803	STAMBPL1	-0.33928	-4.86829	9.03204e-06	0.00376786	9.03204e-06	0.01	0.0169648
chr9:94034751_rs10991864	NFIL3	0.20256	4.86558	9.12018e-06	0.00529677	9.12018e-06	0.01	0.0169648
chr12:27877563_rs7978238	MRPS35	-0.0534123	-4.85197	9.5762e-06	0.00584272	9.5762e-06	0.01	0.0169648
chr10:1097112_rs76620943	WDR37	0.0797692	4.8498	9.65104e-06	0.00397747	9.65104e-06	0.01	0.0169648
chr19:36019522_rs4805129	TMEM147	-0.068337	-4.79061	1.19253e-05	0.00824992	1.19253e-05	0.01	0.0169648
chr12:54288652_rs2204785	ITGA5	0.217274	4.7716	1.27616e-05	0.00743776	1.27616e-05	0.01	0.0169648
chr10:43365697_rs12220767	BMS1	0.0842021	4.75341	1.36151e-05	0.00527139	1.36151e-05	0.01	0.0169648
chr5:176139738_rs62404163	HK3	0.136669	4.74026	1.42671e-05	0.00592184	1.42671e-05	0.01	0.0169648
chr9:100420194_rs140956286	TBC1D2	0.414425	4.7345	1.45619e-05	0.00767632	1.45619e-05	0.01	0.0169648
chr6:122844409_rs197694	SERINC1	-0.0400601	-4.73171	1.47069e-05	0.00394165	1.47069e-05	0.01	0.0169648
chr14:64923977_rs11627387	ZBTB1	0.0560429	4.68691	1.72383e-05	0.00818389	1.72383e-05	0.01	0.0169648
chr11:33360783_rs3847592	HIPK3	0.0401624	4.68016	1.76544e-05	0.006636	1.76544e-05	0.01	0.0169648
chr15:49225391_rs11638748	COPS2	0.0407207	4.6078	2.27861e-05	0.00808935	2.27861e-05	0.01	0.0169648
chr2:27734972_rs6547692	MPV17	-0.0624425	-4.5971	2.36595e-05	0.00954821	2.36595e-05	0.01	0.0169648
chr2:99738008_rs13004491	MITD1	0.0854308	4.55506	2.74165e-05	0.0107226	2.74165e-05	0.01	0.0169648
chr2:187765194_rs139119833	CALCRL	0.232863	4.47916	3.57255e-05	0.0129052	3.57255e-05	0.01	0.0169648
chr3:52752075_rs2109634	GLT8D1	0.0677829	4.34087	5.75997e-05	0.0163508	5.75997e-05	0.01	0.0169648
chr7:6451481_rs866279	RAC1	-0.0762118	-5.01165	5.3863e-06	0.00208925	5.3863e-06	0.011	0.0183599
chr2:84545299_rs114507586	TMSB10	0.137436	4.96789	6.31033e-06	0.00353478	6.31033e-06	0.011	0.0183599
chr1:229468605_rs151471	RAB4A	0.058711	4.96496	6.37746e-06	0.00310063	6.37746e-06	0.011	0.0183599
chr15:32932650_rs8037102	AK310041	0.3115	4.95394	6.63625e-06	0.00316841	6.63625e-06	0.011	0.0183599
chr5:7870973_rs1801394	MTRR	0.0985041	4.95153	6.69419e-06	0.00322384	6.69419e-06	0.011	0.0183599
chr4:77096606_rs35873788	SCARB2	-0.119652	-4.90009	8.05702e-06	0.00473858	8.05702e-06	0.011	0.0183599
chr14:23593442_rs17794251	SLC7A8	0.191246	4.88294	8.56947e-06	0.00483742	8.56947e-06	0.011	0.0183599
chr9:5042981_rs7033052	JAK2	-0.0660625	-4.86396	9.17332e-06	0.00531862	9.17332e-06	0.011	0.0183599
chr19:36619392_rs12981698	CAPNS1	-0.0493253	-4.83431	1.02017e-05	0.00725519	1.02017e-05	0.011	0.0183599
chr1:8338637_rs536218	GPR157	0.379379	4.82275	1.06321e-05	0.00475118	1.06321e-05	0.011	0.0183599
chr2:192017771_rs897200	STAT4	-0.304837	-4.82157	1.0677e-05	0.00520655	1.0677e-05	0.011	0.0183599
chr16:1131181_rs12599155	MRPS34	0.0766871	4.8081	1.12036e-05	0.00620058	1.12036e-05	0.011	0.0183599
chr6:32804381_rs112647257	RXRB	0.102198	4.80594	1.12905e-05	0.00314387	1.12905e-05	0.011	0.0183599
chr2:161269987_rs10929984	RBMS1	-0.0546555	-4.7755	1.25856e-05	0.00592284	1.25856e-05	0.011	0.0183599
chr11:8965372_rs2316541	TMEM9B	0.0572758	4.75932	1.3332e-05	0.00523004	1.3332e-05	0.011	0.0183599
chr17:53471191_rs4570925	MMD	0.170323	4.74833	1.38636e-05	0.00769359	1.38636e-05	0.011	0.0183599
chr9:139449661_rs1571986	DPP7	-0.204952	-4.71949	1.53586e-05	0.00802967	1.53586e-05	0.011	0.0183599
chr19:16355959_rs12972298	AP1M1	-0.0482822	-4.71912	1.53788e-05	0.0101759	1.53788e-05	0.011	0.0183599
chr6:170804451_rs9366235	PSMB1	-0.059045	-4.68926	1.70952e-05	0.00448315	1.70952e-05	0.011	0.0183599
chr1:109680180_rs503883	TAF13	0.0881055	4.67396	1.80459e-05	0.00730146	1.80459e-05	0.011	0.0183599
chr2:130731130_rs11886689	PTPN18	-0.104909	-4.67158	1.81983e-05	0.00782446	1.81983e-05	0.011	0.0183599
chr1:156040310_rs2275075	YY1AP1	-0.0613119	-4.61476	2.22355e-05	0.00864172	2.22355e-05	0.011	0.0183599
chr8:67134662_rs4458858	ADHFE1	0.307514	4.59451	2.3875e-05	0.0107565	2.3875e-05	0.011	0.0183599
chr3:46793945_rs62248376	SMARCC1	0.0522043	4.45932	3.82746e-05	0.0117604	3.82746e-05	0.011	0.0183599
chr2:96328039_rs113190483	ARID5A	-0.0794916	-4.34778	5.62487e-05	0.0182827	5.62487e-05	0.011	0.0183599
chr9:71205800_rs4745135	CBWD5	0.372474	3.98966	0.000188038	0.0564628	0.000188038	0.011	0.0183599
chr16:9319792_rs7204699	C16orf72	-0.0565859	-5.03173	5.00806e-06	0.00337209	5.00806e-06	0.012	0.0197228
chr7:28888086_rs10228137	CREB5	0.316987	5.00175	5.58286e-06	0.00214995	5.58286e-06	0.012	0.0197228
chr21:46244131_rs690350	SUMO3	-0.070928	-4.94164	6.93756e-06	0.00309781	6.93756e-06	0.012	0.0197228
chr11:86384063_rs12098937	ME3	-0.414283	-4.90444	7.93216e-06	0.00343854	7.93216e-06	0.012	0.0197228
chr17:73123081_rs11652717	GRB2	0.0458197	4.89337	8.25419e-06	0.00515605	8.25419e-06	0.012	0.0197228
chr17:33808700_rs72826000	CCL4L2	1.09279	4.87815	8.71805e-06	0.00535477	8.71805e-06	0.012	0.0197228
chr1:203942919_rs12036511	SNRPE	0.152752	4.87348	8.86535e-06	0.00407198	8.86535e-06	0.012	0.0197228
chr1:160660993_rs11265467	CD48	-0.421033	-4.85588	9.44311e-06	0.00429649	9.44311e-06	0.012	0.0197228
chr5:79438312_rs12513770	SERINC5	-0.120459	-4.83898	1.00326e-05	0.00452855	1.00326e-05	0.012	0.0197228
chr12:27649554_rs73088346	ASUN	0.138012	4.80854	1.11864e-05	0.00668212	1.11864e-05	0.012	0.0197228
chr6:44147821_rs34710081	DNPH1	0.169478	4.79794	1.16176e-05	0.00322146	1.16176e-05	0.012	0.0197228
chr17:7476706_rs75853747	SENP3-EIF4A1	0.0593749	4.79643	1.16806e-05	0.00673412	1.16806e-05	0.012	0.0197228
chr6:36127469_rs12199702	MAPK13	-0.202447	-4.78798	1.20381e-05	0.00332172	1.20381e-05	0.012	0.0197228
chr5:77646176_rs10942847	LHFPL2	0.105072	4.76775	1.29378e-05	0.00548186	1.29378e-05	0.012	0.0197228
chr22:41747717_rs3817999	SMDT1	-0.0891248	-4.73865	1.43487e-05	0.00835471	1.43487e-05	0.012	0.0197228
chr12:21671107_rs80115468	GOLT1B	-0.122413	-4.73341	1.46185e-05	0.00835845	1.46185e-05	0.012	0.0197228
chr6:109793029_rs3799842	SMPD2	-0.162396	-4.70825	1.59832e-05	0.00422913	1.59832e-05	0.012	0.0197228
chr12:121290124_rs1718180	SPPL3	0.0596401	4.70585	1.61201e-05	0.00905982	1.61201e-05	0.012	0.0197228
chr7:44949798_rs9639903	H2AFV	0.0615456	4.64365	2.0084e-05	0.005905	2.0084e-05	0.012	0.0197228
chr17:80710278_rs2451217	TBCD	0.10313	4.58068	2.50628e-05	0.0120205	2.50628e-05	0.012	0.0197228
chr5:137831553_rs2351028	EGR1	0.761076	4.57579	2.54965e-05	0.00921335	2.54965e-05	0.012	0.0197228
chr12:50409457_rs187431133	TUBA1C	0.168913	4.49307	3.40385e-05	0.0166522	3.40385e-05	0.012	0.0197228
chr17:57920532_rs2645479	VMP1	-0.0661834	-4.48425	3.50994e-05	0.0155876	3.50994e-05	0.012	0.0197228
chr6:126133389_rs600709	NCOA7	0.219616	4.41414	4.47559e-05	0.0100782	4.47559e-05	0.012	0.0197228
chr20:30043091_rs182500	FRG1B	0.372477	4.08753	0.000135841	0.039216	0.000135841	0.012	0.0197228
chr7:66520479_rs112138762	SBDS	0.250046	5.4719	9.93137e-07	0.000510455	9.93137e-07	0.013	0.0209436
chr8:2077072_rs2280902	MYOM2	0.790396	5.42458	1.18401e-06	0.00110112	1.18401e-06	0.013	0.0209436
chr18:66395183_rs309232	TMX3	0.0755696	5.00301	5.55745e-06	0.00421885	5.55745e-06	0.013	0.0209436
chr5:172412855_rs6887998	ATP6V0E1	-0.0489664	-4.98298	5.97522e-06	0.00293289	5.97522e-06	0.013	0.0209436
chr3:4426791_rs113231393	SUMF1	0.155745	4.96059	6.47879e-06	0.00298377	6.47879e-06	0.013	0.0209436
chr7:22893992_rs9639444	SNORD93	-0.392891	-4.92493	7.36812e-06	0.00266396	7.36812e-06	0.013	0.0209436
chr14:56200473_rs945270	KTN1	0.0829718	4.92158	7.45763e-06	0.0043364	7.45763e-06	0.013	0.0209436
chr6:166732624_rs4598048	SFT2D1	-0.0737573	-4.86664	9.08569e-06	0.00259744	9.08569e-06	0.013	0.0209436
chr4:40722825_rs790147	RBM47	-0.0836782	-4.86336	9.19324e-06	0.00524215	9.19324e-06	0.013	0.0209436
chr16:616701_rs62030865	C16orf13	-0.242211	-4.82725	1.04625e-05	0.00589203	1.04625e-05	0.013	0.0209436
chr8:144643169_rs1545536	NAPRT1	0.247382	4.80896	1.11692e-05	0.00619288	1.11692e-05	0.013	0.0209436
chr1:193564497_rs1962502	CDC73	0.128736	4.79555	1.17173e-05	0.00515996	1.17173e-05	0.013	0.0209436
chr7:126945510_rs1419392	ZNF800	-0.0526807	-4.78838	1.20206e-05	0.0039226	1.20206e-05	0.013	0.0209436
chr7:100336493_rs140939785	TRIP6	2.27153	4.78042	1.23666e-05	0.00401616	1.23666e-05	0.013	0.0209436
chr7:35757658_rs10237388	HERPUD2	-0.058977	-4.76449	1.30891e-05	0.00421278	1.30891e-05	0.013	0.0209436
chr2:202119789_rs10931934	CASP8	-0.0745577	-4.75051	1.37564e-05	0.00631698	1.37564e-05	0.013	0.0209436
chr21:27097982_rs7276776	ATP5J	0.150204	4.74412	1.40726e-05	0.00565259	1.40726e-05	0.013	0.0209436
chr19:6307534_rs74856711	CLPP	-0.234676	-4.73406	1.45847e-05	0.00974874	1.45847e-05	0.013	0.0209436
chr3:10295605_rs421428	TATDN2	-0.0615864	-4.73328	1.46253e-05	0.00587536	1.46253e-05	0.013	0.0209436
chr3:29249996_rs7642347	AZI2	0.0586399	4.70686	1.60622e-05	0.00629556	1.60622e-05	0.013	0.0209436
chr1:175153502_rs3766687	KIAA0040	0.0967802	4.69812	1.65672e-05	0.00681898	1.65672e-05	0.013	0.0209436
chr2:74756176_rs2231250	AUP1	0.0644404	4.66458	1.86539e-05	0.00795413	1.86539e-05	0.013	0.0209436
chr11:71269096_rs12804021	IL18BP	0.21813	4.64797	1.97801e-05	0.00726458	1.97801e-05	0.013	0.0209436
chr4:56204865_rs11935857	SRD5A3	-0.247813	-4.64515	1.99782e-05	0.00979789	1.99782e-05	0.013	0.0209436
chr4:104421829_rs340473	NFKB1	0.0898414	4.63772	2.05086e-05	0.00998884	2.05086e-05	0.013	0.0209436
chr1:46086329_rs11590549	RPS8	0.0716092	4.62038	2.17997e-05	0.00852053	2.17997e-05	0.013	0.0209436
chr17:62468575_rs140290142	DDX5	0.0495427	4.60832	2.27441e-05	0.011151	2.27441e-05	0.013	0.0209436
chr4:103344422_rs2169595	SLC39A8	0.152847	4.60187	2.3266e-05	0.0110377	2.3266e-05	0.013	0.0209436
chr17:38124892_rs59843584	ORMDL3	0.186099	4.5702	2.60005e-05	0.0123769	2.60005e-05	0.013	0.0209436
chr1:52488341_rs2252961	BTF3L4	-0.092549	-4.44609	4.00717e-05	0.0135584	4.00717e-05	0.013	0.0209436
chr1:27661037_rs12565684	IFI6	0.375082	4.38177	5.00444e-05	0.0158389	5.00444e-05	0.013	0.0209436
chr16:30107285_rs12444973	CORO1A	0.12209	4.34193	5.73905e-05	0.0221926	5.73905e-05	0.013	0.0209436
chr10:75306393_rs57006370	MRPS16	-0.207103	-4.19033	9.61706e-05	0.0251703	9.61706e-05	0.013	0.0209436
chr11:117088450_rs236915	PAFAH1B2	0.0782373	5.09894	3.92228e-06	0.00194117	3.92228e-06	0.014	0.0222216
chr19:1658966_rs67178614	TCF3	-0.1464	-5.09375	3.99717e-06	0.0033598	3.99717e-06	0.014	0.0222216
chr6:36704293_rs56285849	TMEM217	-0.98187	-4.99782	5.66302e-06	0.00174134	5.66302e-06	0.014	0.0222216
chr7:44822385_rs4724321	PPIA	0.039816	4.88984	8.35941e-06	0.00293541	8.35941e-06	0.014	0.0222216
chr20:4913904_rs73893863	RASSF2	-0.295598	-4.87862	8.70338e-06	0.00488002	8.70338e-06	0.014	0.0222216
chr8:97840032_rs7837462	CPQ	-0.154907	-4.8781	8.71958e-06	0.00514674	8.71958e-06	0.014	0.0222216
chr8:41503937_rs58895504	AGPAT6	-0.136898	-4.86089	9.2751e-06	0.00537073	9.2751e-06	0.014	0.0222216
chr5:115654605_rs712588	COMMD10	-0.0848579	-4.83588	1.01445e-05	0.00457117	1.01445e-05	0.014	0.0222216
chr6:1035851_rs6916993	EXOC2	-0.116644	-4.82543	1.05308e-05	0.00295612	1.05308e-05	0.014	0.0222216
chr6:8110115_rs1832023	EEF1E1	0.138815	4.82244	1.06441e-05	0.0029849	1.06441e-05	0.014	0.0222216
chr2:71316290_rs146028975	MPHOSPH10	-0.0866904	-4.8205	1.07183e-05	0.00521789	1.07183e-05	0.014	0.0222216
chr8:101392568_rs60810270	RNF19A	-0.109727	-4.80115	1.14852e-05	0.00634002	1.14852e-05	0.014	0.0222216
chr12:6962978_rs1076865	TPI1	0.13325	4.79426	1.17711e-05	0.00697612	1.17711e-05	0.014	0.0222216
chr17:7950394_rs9895916	ALOX15B	0.827445	4.78539	1.21497e-05	0.00693446	1.21497e-05	0.014	0.0222216
chr6:53509035_rs12662589	GCLC	0.138404	4.71375	1.56745e-05	0.00415999	1.56745e-05	0.014	0.0222216
chr2:121159524_rs10167194	TMEM37	-0.269143	-4.69385	1.68196e-05	0.00737831	1.68196e-05	0.014	0.0222216
chr22:35724659_rs138785	TOM1	0.0701163	4.67188	1.81793e-05	0.010215	1.81793e-05	0.014	0.0222216
chr1:155089883_rs7365736	KRTCAP2	0.0667291	4.63305	2.08486e-05	0.00822316	2.08486e-05	0.014	0.0222216
chr15:39624829_rs75684456	BMF	0.241828	4.63065	2.10255e-05	0.00757178	2.10255e-05	0.014	0.0222216
chr15:68072381_rs17244601	CALML4	0.15291	4.61117	2.25177e-05	0.00800788	2.25177e-05	0.014	0.0222216
chr3:141125186_rs1344674	ZBTB38	-0.10883	-4.56605	2.63814e-05	0.00899017	2.63814e-05	0.014	0.0222216
chr1:179852160_rs76860548	TOR1AIP1	0.0632974	4.56577	2.64073e-05	0.00983453	2.64073e-05	0.014	0.0222216
chr16:69736851_rs12232410	NQO1	0.214281	4.54885	2.80187e-05	0.0129465	2.80187e-05	0.014	0.0222216
chr2:203150949_rs7568159	NOP58	-0.0589101	-4.52165	3.08117e-05	0.0116072	3.08117e-05	0.014	0.0222216
chr20:34174092_rs6142416	ROMO1	-0.103269	-4.41692	4.43285e-05	0.0178673	4.43285e-05	0.014	0.0222216
chr19:51917365_rs60673310	SIGLEC10	0.310391	4.91676	7.58818e-06	0.00565878	7.58818e-06	0.015	0.0235035
chr14:23574116_rs113568525	PRMT5	-0.142683	-4.8693	8.9995e-06	0.00497037	8.9995e-06	0.015	0.0235035
chr2:241566429_rs2975781	GPR35	-0.232695	-4.86311	9.20152e-06	0.00467026	9.20152e-06	0.015	0.0235035
chr18:54321353_rs4801044	WDR7	0.123248	4.83805	1.00658e-05	0.00664311	1.00658e-05	0.015	0.0235035
chr3:189533150_rs12486772	LEPREL1	0.822481	4.77368	1.26674e-05	0.00527483	1.26674e-05	0.015	0.0235035
chr1:6786156_rs12568431	THAP3	0.153963	4.76588	1.30242e-05	0.00563184	1.30242e-05	0.015	0.0235035
chr5:39516829_rs11741120	DAB2	-0.10795	-4.73994	1.42829e-05	0.00592463	1.42829e-05	0.015	0.0235035
chr12:104263118_rs7967501	HSP90B1	0.089909	4.72261	1.51899e-05	0.00862278	1.51899e-05	0.015	0.0235035
chr1:156573464_rs4661203	GPATCH4	0.271813	4.72169	1.52393e-05	0.00637123	1.52393e-05	0.015	0.0235035
chr8:57204168_rs62515459	LYN	-0.0895367	-4.71597	1.55518e-05	0.00787569	1.55518e-05	0.015	0.0235035
chr2:24453537_rs2543669	ITSN2	-0.0821555	-4.71553	1.55761e-05	0.00695599	1.55761e-05	0.015	0.0235035
chr1:205282979_rs4950989	NUAK2	0.27553	4.70979	1.58964e-05	0.0065884	1.58964e-05	0.015	0.0235035
chr1:100908678_rs78315260	EXTL2	0.893276	4.69134	1.69702e-05	0.00695123	1.69702e-05	0.015	0.0235035
chr9:140753189_rs7038664	ABCA2	-0.28368	-4.67861	1.77515e-05	0.009048	1.77515e-05	0.015	0.0235035
chr12:6629113_rs10849480	NCAPD2	0.08151	4.64751	1.98126e-05	0.0108274	1.98126e-05	0.015	0.0235035
chr6:42249481_rs1004338	RRP36	0.0542344	4.6467	1.98692e-05	0.00508156	1.98692e-05	0.015	0.0235035
chr13:48353477_rs9534825	MED4	-0.104007	-4.61918	2.18919e-05	0.0154452	2.18919e-05	0.015	0.0235035
chr4:48235740_rs75962184	TEC	0.264692	4.57239	2.58015e-05	0.0120423	2.58015e-05	0.015	0.0235035
chr4:1008404_rs6814476	FGFRL1	-0.427331	-4.48995	3.44104e-05	0.0150034	3.44104e-05	0.015	0.0235035
chr16:30140292_rs9921544	MAPK3	-0.132168	-4.47771	3.5907e-05	0.0155997	3.5907e-05	0.015	0.0235035
chr9:130721773_rs7858644	FAM102A	-0.163226	-4.44366	4.04095e-05	0.0170784	4.04095e-05	0.015	0.0235035
chr3:50129399_rs2013208	UBA7	-0.0831323	-4.21512	8.84321e-05	0.0224498	8.84321e-05	0.015	0.0235035
chr10:70621086_rs4320849	KIAA1279	0.0719201	4.89535	8.19569e-06	0.00348296	8.19569e-06	0.016	0.0247386
chr19:50287644_rs10425303	AP2A1	-0.0513469	-4.89164	8.30564e-06	0.00611147	8.30564e-06	0.016	0.0247386
chr22:37258503_rs4821544	NCF4	0.115793	4.88808	8.41253e-06	0.0053641	8.41253e-06	0.016	0.0247386
chr17:5303747_rs8066460	NUP88	0.0767123	4.86009	9.30177e-06	0.00563893	9.30177e-06	0.016	0.0247386
chr17:65386837_rs62084077	PSMD12	0.0516468	4.83279	1.02572e-05	0.00610948	1.02572e-05	0.016	0.0247386
chr17:8869709_rs2470234	PIK3R5	-0.0874153	-4.83237	1.02728e-05	0.00611547	1.02728e-05	0.016	0.0247386
chr7:3124565_rs28785259	TTYH3	0.0924196	4.80323	1.14005e-05	0.00375502	1.14005e-05	0.016	0.0247386
chr9:135219981_rs510241	SETX	0.0450949	4.7953	1.17274e-05	0.00650399	1.17274e-05	0.016	0.0247386
chr17:73192415_rs10852759	NUP85	0.0745597	4.77725	1.25075e-05	0.0070885	1.25075e-05	0.016	0.0247386
chr12:7376654_rs1551097	SLC2A3	0.148353	4.74239	1.41591e-05	0.00813747	1.41591e-05	0.016	0.0247386
chr19:16211810_rs11673157	MED26	-0.0576068	-4.73037	1.47771e-05	0.00984795	1.47771e-05	0.016	0.0247386
chr1:111437421_rs2070749	CD53	0.0557979	4.72373	1.51297e-05	0.00633852	1.51297e-05	0.016	0.0247386
chr19:45099447_rs2357101	ERCC1	-0.126889	-4.70961	1.59065e-05	0.0104717	1.59065e-05	0.016	0.0247386
chr12:53473298_rs3814774	SPRYD3	-0.181	-4.67102	1.82344e-05	0.0100588	1.82344e-05	0.016	0.0247386
chr20:49105553_rs6126023	B4GALT5	-0.0838972	-4.63801	2.04876e-05	0.00977552	2.04876e-05	0.016	0.0247386
chr15:83762285_rs62010181	TM6SF1	-0.179515	-4.62972	2.10946e-05	0.00758926	2.10946e-05	0.016	0.0247386
chr9:130821611_rs7871032	PTGES2	0.0745252	4.62011	2.18202e-05	0.0107298	2.18202e-05	0.016	0.0247386
chr1:47822913_rs7534328	CMPK1	0.0474776	4.59213	2.40757e-05	0.00914797	2.40757e-05	0.016	0.0247386
chr3:43512122_rs13322728	SNRK	0.0818224	4.54766	2.8135e-05	0.00936165	2.8135e-05	0.016	0.0247386
chr4:82581895_rs28689174	RASGEF1B	0.197954	4.52691	3.02515e-05	0.0136788	3.02515e-05	0.016	0.0247386
chr11:65019370_rs61895407	POLA2	-0.137606	-4.482	3.5375e-05	0.0117497	3.5375e-05	0.016	0.0247386
chr11:47380340_rs3740688	MADD	0.0471395	4.42464	4.31608e-05	0.0138099	4.31608e-05	0.016	0.0247386
chr1:121273510_rs6600747	SRGAP2D	0.100087	4.05797	0.000149917	0.0366215	0.000149917	0.016	0.0247386
chr15:92964428_rs16946889	LOC100507217	-0.14164	-4.97217	6.21342e-06	0.00299824	6.21342e-06	0.017	0.0259709
chr9:135663521_rs215156	AK8	0.423178	4.85438	9.49388e-06	0.00547932	9.49388e-06	0.017	0.0259709
chr1:160518737_rs3755898	CD84	-0.0699257	-4.84923	9.67073e-06	0.00438381	9.67073e-06	0.017	0.0259709
chr12:53071382_rs2741159	KRT1	-0.534199	-4.82835	1.04213e-05	0.00627365	1.04213e-05	0.017	0.0259709
chr12:104239133_rs7957036	TDG	0.0629233	4.80463	1.13435e-05	0.00676451	1.13435e-05	0.017	0.0259709
chr14:90514313_rs7146134	EFCAB11	0.284881	4.7969	1.1661e-05	0.00601672	1.1661e-05	0.017	0.0259709
chr4:185085860_rs73007863	CASP3	0.0982132	4.74986	1.37885e-05	0.00732814	1.37885e-05	0.017	0.0259709
chr3:15202312_rs79893051	SH3BP5	-0.206916	-4.72765	1.49207e-05	0.00597398	1.49207e-05	0.017	0.0259709
chr13:48209593_rs2406442	ESD	0.0932584	4.72738	1.49347e-05	0.0112239	1.49347e-05	0.017	0.0259709
chr19:14629550_rs11085895	TECR	-0.0917157	-4.72481	1.50715e-05	0.0100103	1.50715e-05	0.017	0.0259709
chr10:98526677_rs4917750	EXOSC1	0.103626	4.71239	1.57508e-05	0.00593979	1.57508e-05	0.017	0.0259709
chr7:37975639_rs13237497	EPDR1	0.28071	4.71028	1.58689e-05	0.00487463	1.58689e-05	0.017	0.0259709
chr1:227139143_rs2482450	ADCK3	-0.118377	-4.70935	1.59214e-05	0.00659571	1.59214e-05	0.017	0.0259709
chr22:25131985_rs9624575	UPB1	0.760037	4.68705	1.72295e-05	0.00974065	1.72295e-05	0.017	0.0259709
chr2:136586410_rs72972158	DARS	-0.154862	-4.62434	2.14981e-05	0.00885897	2.14981e-05	0.017	0.0259709
chr17:37278948_rs16239	GSDMB	0.404283	4.58306	2.48544e-05	0.0119413	2.48544e-05	0.017	0.0259709
chr11:64661401_rs7939874	OTUB1	0.0572283	4.49527	3.3779e-05	0.0112916	3.3779e-05	0.017	0.0259709
chr11:104695000_rs6591100	CASP1	0.105648	4.43065	4.22715e-05	0.0135765	4.22715e-05	0.017	0.0259709
chr1:52293570_rs2077725	NRD1	-0.032306	-4.30226	6.57403e-05	0.0194766	6.57403e-05	0.017	0.0259709
chr2:97024331_rs798202	STARD7	0.0908133	4.28513	6.97015e-05	0.0212886	6.97015e-05	0.017	0.0259709
chr5:70307464_rs4976210	SMA5	0.925431	3.71296	0.00046176	0.0789206	0.00046176	0.017	0.0259709
chr12:6834213_rs11064333	COPS7A	0.139719	5.20792	2.63342e-06	0.00195866	2.63342e-06	0.018	0.027159
chr9:78998756_rs11144867	RFK	-0.157987	-4.96998	6.26287e-06	0.00391398	6.26287e-06	0.018	0.027159
chr14:73432189_rs2535902	NUMB	-0.0495783	-4.85026	9.63536e-06	0.00520949	9.63536e-06	0.018	0.027159
chr19:46188357_rs112128231	SNRPD2	0.0696316	4.84485	9.82371e-06	0.00702288	9.82371e-06	0.018	0.027159
chr16:55602395_rs1502004	LPCAT2	0.132367	4.83297	1.02507e-05	0.00580186	1.02507e-05	0.018	0.027159
chr18:23790991_rs9967519	SS18	-0.0602051	-4.81873	1.07862e-05	0.00702342	1.07862e-05	0.018	0.027159
chr16:56576568_rs12447596	MT1A	-0.446325	-4.77933	1.24151e-05	0.00673383	1.24151e-05	0.018	0.027159
chr11:117804139_rs543057	TMPRSS13	0.297372	4.72999	1.47968e-05	0.00568854	1.47968e-05	0.018	0.027159
chr5:81718711_rs393181	TMEM167A	0.0559422	4.716	1.55503e-05	0.00631757	1.55503e-05	0.018	0.027159
chr17:8770138_rs12602123	PIK3R6	0.154625	4.71572	1.55658e-05	0.00836312	1.55658e-05	0.018	0.027159
chr2:231247873_rs11677646	SP140L	0.130904	4.69985	1.64661e-05	0.00725602	1.64661e-05	0.018	0.027159
chr8:29255989_rs633374	EXTL3	0.144826	4.67483	1.79906e-05	0.00877559	1.79906e-05	0.018	0.027159
chr2:26699855_rs2272069	OTOF	-0.607451	-4.64704	1.98453e-05	0.00832216	1.98453e-05	0.018	0.027159
chr14:76066154_rs4903334	FLVCR2	0.11527	4.63546	2.06724e-05	0.00940591	2.06724e-05	0.018	0.027159
chr5:140989242_rs10477148	HDAC3	-0.0616752	-4.63411	2.07713e-05	0.00785998	2.07713e-05	0.018	0.027159
chr10:98451692_rs756030	PI4K2A	-0.0634401	-4.61425	2.22754e-05	0.00780738	2.22754e-05	0.018	0.027159
chr16:74634128_rs55700094	RFWD3	0.159507	4.58761	2.4461e-05	0.011562	2.4461e-05	0.018	0.027159
chr19:21804968_rs7255865	ZNF738	-0.174251	-4.54747	2.81539e-05	0.0166816	2.81539e-05	0.018	0.027159
chr19:38503755_rs833918	PSMD8	-0.0609185	-4.54382	2.85154e-05	0.016838	2.85154e-05	0.018	0.027159
chr12:57545756_rs6581124	MBD6	-0.0794555	-4.46915	3.69901e-05	0.0177418	3.69901e-05	0.018	0.027159
chr16:67033680_rs12597510	DYNC1LI2	0.05576	4.45858	3.83728e-05	0.0164397	3.83728e-05	0.018	0.027159
chr5:138912250_rs75538730	UBE2D2	-0.0813387	-4.39124	4.84364e-05	0.0147753	4.84364e-05	0.018	0.027159
chr11:20298798_rs1108001	HTATIP2	0.110948	5.03279	4.98877e-06	0.00237101	4.98877e-06	0.019	0.0283652
chr11:2923826_rs367035	SLC22A18	0.263104	4.91873	7.53453e-06	0.00330254	7.53453e-06	0.019	0.0283652
chr17:7675260_rs9902382	VAMP2	-0.064198	-4.82048	1.07187e-05	0.00631389	1.07187e-05	0.019	0.0283652
chr14:21449070_rs12589870	METTL17	-0.0716852	-4.81534	1.09177e-05	0.00568572	1.09177e-05	0.019	0.0283652
chr18:48373001_rs72929713	ME2	-0.112499	-4.74832	1.3864e-05	0.00866201	1.3864e-05	0.019	0.0283652
chr6:137101726_rs1570054	MAP3K5	-0.0801995	-4.71705	1.54926e-05	0.00412325	1.54926e-05	0.019	0.0283652
chr14:24925789_rs56636147	SDR39U1	-0.1021	-4.70422	1.6213e-05	0.00783464	1.6213e-05	0.019	0.0283652
chr3:139797844_rs16849828	RBP1	-0.393091	-4.67769	1.78093e-05	0.00683318	1.78093e-05	0.019	0.0283652
chr1:63303845_rs10493327	ATG4C	-0.078949	-4.66484	1.86371e-05	0.00749484	1.86371e-05	0.019	0.0283652
chr5:171533629_rs2306963	NPM1	0.0415717	4.64802	1.97773e-05	0.00756311	1.97773e-05	0.019	0.0283652
chr6:117279904_rs9489073	TSPYL1	-0.0754356	-4.64663	1.98739e-05	0.0050823	1.98739e-05	0.019	0.0283652
chr6:32797876_rs241436	HLA-DOB	0.464673	4.64089	2.02807e-05	0.00517383	2.02807e-05	0.019	0.0283652
chr4:17674655_rs2315559	MED28	-0.0814842	-4.61275	2.23932e-05	0.0106959	2.23932e-05	0.019	0.0283652
chr7:64437121_rs12530729	CCT6P3	-0.310103	-4.6052	2.29952e-05	0.00659508	2.29952e-05	0.019	0.0283652
chr9:124376589_rs605576	PSMD5	0.0557193	4.50152	3.30518e-05	0.0147943	3.30518e-05	0.019	0.0283652
chr7:123476854_rs36924	NDUFA5	0.0888582	4.43987	4.09443e-05	0.010581	4.09443e-05	0.019	0.0283652
chr16:21595106_rs11640079	LOC23117	0.106951	4.40721	4.58399e-05	0.0187855	4.58399e-05	0.019	0.0283652
chr3:51966504_rs323885	PARP3	0.330193	4.19076	9.60306e-05	0.023988	9.60306e-05	0.019	0.0283652
chr20:34271092_rs6060558	RBM39	-0.0457681	-4.1656	0.000104537	0.0329841	0.000104537	0.019	0.0283652
chr19:56294159_rs71368870	RFPL4A	-2.25413	-5.73782	3.6722e-07	0.000532306	3.6722e-07	0.02	0.0293686
chr7:32948250_rs62467396	NT5C3A	-0.31745	-4.84442	9.83887e-06	0.00331819	9.83887e-06	0.02	0.0293686
chr17:15012506_rs11867640	TRIM16	-0.173655	-4.80355	1.13872e-05	0.0066053	1.13872e-05	0.02	0.0293686
chr3:5023996_rs6779816	BHLHE40	-0.107592	-4.76815	1.29194e-05	0.00536986	1.29194e-05	0.02	0.0293686
chr1:63605601_rs11585289	USP1	0.0487336	4.76609	1.30145e-05	0.00563085	1.30145e-05	0.02	0.0293686
chr4:5379173_rs77662691	STX18	0.166792	4.75129	1.37185e-05	0.0072988	1.37185e-05	0.02	0.0293686
chr4:56921734_rs59053231	TMEM165	0.0591387	4.74865	1.38479e-05	0.00735653	1.38479e-05	0.02	0.0293686
chr1:236703010_rs2489151	LGALS8	0.0835868	4.73749	1.4408e-05	0.00609694	1.4408e-05	0.02	0.0293686
chr17:14249167_rs3785655	HS3ST3A1	-1.46857	-4.73012	1.47904e-05	0.00808981	1.47904e-05	0.02	0.0293686
chr17:7396267_rs4265880	ZBTB4	-0.1186	-4.72328	1.51535e-05	0.00821088	1.51535e-05	0.02	0.0293686
chr12:52963057_rs11170174	AAAS	-0.0790177	-4.72236	1.52031e-05	0.00862719	1.52031e-05	0.02	0.0293686
chr13:28067154_rs12585724	MTIF3	0.179275	4.72057	1.53003e-05	0.011462	1.53003e-05	0.02	0.0293686
chr9:77689082_rs13293640	NMRK1	-0.198415	-4.70941	1.59175e-05	0.00824741	1.59175e-05	0.02	0.0293686
chr17:72632558_rs62086682	SLC9A3R1	-0.114	-4.6755	1.79478e-05	0.00931893	1.79478e-05	0.02	0.0293686
chr9:117821746_rs2236409	TNC	1.38122	4.67542	1.79529e-05	0.00911197	1.79529e-05	0.02	0.0293686
chr3:119023804_rs7620780	ARHGAP31	0.148356	4.66809	1.84242e-05	0.00700361	1.84242e-05	0.02	0.0293686
chr20:43568766_rs11907237	TOMM34	-0.196777	-4.62428	2.15024e-05	0.0101488	2.15024e-05	0.02	0.0293686
chr15:40600198_rs3784400	PLCB2	0.0998303	4.60983	2.26237e-05	0.00804094	2.26237e-05	0.02	0.0293686
chr22:24186809_rs6003915	CHCHD10	-0.149578	-4.58314	2.48477e-05	0.0131463	2.48477e-05	0.02	0.0293686
chr20:47915390_rs237706	ZFAS1	-0.118867	-4.54599	2.83002e-05	0.0126251	2.83002e-05	0.02	0.0293686
chr5:67736940_rs7704612	CCNB1	0.160706	4.50125	3.30831e-05	0.011328	3.30831e-05	0.02	0.0293686
chr3:44995307_rs7633765	LIMD1	-0.107334	-4.4937	3.39639e-05	0.0107484	3.39639e-05	0.02	0.0293686
chr9:123586737_rs10760117	PHF19	-0.138234	-4.49106	3.42776e-05	0.0152406	3.42776e-05	0.02	0.0293686
chr1:24519437_rs59960858	CLIC4	-0.0806544	-4.48928	3.4491e-05	0.0120773	3.4491e-05	0.02	0.0293686
chr7:100123519_rs60675124	LRCH4	-0.134645	-4.46998	3.68833e-05	0.00975906	3.68833e-05	0.02	0.0293686
chr7:115852160_rs12672804	TES	-0.115936	-4.44349	4.04333e-05	0.0104819	4.04333e-05	0.02	0.0293686
chr15:45045738_rs7164679	TRIM69	0.145922	4.42096	4.37136e-05	0.0135417	4.37136e-05	0.02	0.0293686
chr8:38576759_rs6474495	TACC1	0.0607583	4.40193	4.6684e-05	0.0175957	4.6684e-05	0.02	0.0293686
chr15:64421302_rs2898653	SPG21	-0.0609681	-4.35885	5.41507e-05	0.016017	5.41507e-05	0.02	0.0293686
chr5:129648031_rs112485777	HINT1	-0.0725921	-4.25953	7.60551e-05	0.0208714	7.60551e-05	0.02	0.0293686
chr7:24796693_rs1476522	DFNA5	-0.554585	-4.98942	5.83767e-06	0.00222511	5.83767e-06	0.021	0.0304543
chr16:84673457_rs12931425	KLHL36	0.0693197	4.98326	5.96935e-06	0.00386761	5.96935e-06	0.021	0.0304543
chr4:4175909_rs12500396	TMEM128	-0.168884	-4.86943	8.99518e-06	0.00514941	8.99518e-06	0.021	0.0304543
chr14:94595989_rs2273514	IFI27L2	0.227171	4.79081	1.19168e-05	0.00612045	1.19168e-05	0.021	0.0304543
chr17:4673023_rs6502821	VMO1	1.08463	4.73166	1.47096e-05	0.00805494	1.47096e-05	0.021	0.0304543
chr16:1297810_rs4984779	TPSD1	-1.53018	-4.71793	1.54443e-05	0.00798931	1.54443e-05	0.021	0.0304543
chr6:161530188_rs6922534	MAP3K4	0.197855	4.696	1.66922e-05	0.00439122	1.66922e-05	0.021	0.0304543
chr1:57651497_rs197655	PPAP2B	-0.293167	-4.68808	1.71668e-05	0.00701352	1.71668e-05	0.021	0.0304543
chr17:48569755_rs60117965	RSAD1	0.0757287	4.66879	1.83789e-05	0.00949207	1.83789e-05	0.021	0.0304543
chr16:783173_rs2071952	HAGHL	-0.199756	-4.66201	1.88244e-05	0.00938045	1.88244e-05	0.021	0.0304543
chr5:6634688_rs531290	SRD5A1	-0.0864049	-4.62885	2.11591e-05	0.00797911	2.11591e-05	0.021	0.0304543
chr5:52060350_rs1391987	ITGA1	0.409736	4.62672	2.13188e-05	0.00801149	2.13188e-05	0.021	0.0304543
chr16:1756051_rs58515728	UBE2I	0.0510435	4.61556	2.21728e-05	0.0106525	2.21728e-05	0.021	0.0304543
chr1:26200602_rs190043	MTFR1L	-0.0575334	-4.59536	2.38038e-05	0.00906845	2.38038e-05	0.021	0.0304543
chr10:96074939_rs12220125	NOC3L	-0.102882	-4.59126	2.41496e-05	0.00828338	2.41496e-05	0.021	0.0304543
chr1:40528688_rs3131669	CAP1	-0.0362031	-4.5705	2.59737e-05	0.00970882	2.59737e-05	0.021	0.0304543
chr1:109335789_rs11102444	STXBP3	-0.107291	-4.5678	2.62203e-05	0.00978325	2.62203e-05	0.021	0.0304543
chr3:100485428_rs4616685	TFG	0.0580118	4.53629	2.9276e-05	0.00959575	2.9276e-05	0.021	0.0304543
chr17:40122485_rs12952456	CNP	0.089333	4.50693	3.24348e-05	0.0147113	3.24348e-05	0.021	0.0304543
chr11:59554659_rs75068197	STX3	0.103468	4.44612	4.00672e-05	0.013024	4.00672e-05	0.021	0.0304543
chr16:92370_rs1088641	MPG	0.165571	4.42661	4.28675e-05	0.0178606	4.28675e-05	0.021	0.0304543
chr11:64012225_rs605187	VEGFB	-0.257429	-4.40083	4.68606e-05	0.0148189	4.68606e-05	0.021	0.0304543
chr19:42477310_rs8107107	CIC	0.0735282	4.33944	5.78815e-05	0.0292922	5.78815e-05	0.021	0.0304543
chr3:9039469_rs523684	BRPF1	0.0646201	4.75968	1.33147e-05	0.00550562	1.33147e-05	0.022	0.0315638
chr9:123820360_rs72758197	C5	0.259684	4.75881	1.33563e-05	0.00717352	1.33563e-05	0.022	0.0315638
chr20:1448366_rs6135033	NSFL1C	0.0760711	4.75569	1.35052e-05	0.00702215	1.35052e-05	0.022	0.0315638
chr14:53131152_rs4901291	TXNDC16	-0.233654	-4.73563	1.45034e-05	0.0071344	1.45034e-05	0.022	0.0315638
chr1:11968406_rs12092734	KIAA2013	-0.0484087	-4.68658	1.72581e-05	0.00704601	1.72581e-05	0.022	0.0315638
chr19:47285383_rs111629961	SLC1A5	0.242787	4.67689	1.78598e-05	0.0114919	1.78598e-05	0.022	0.0315638
chr1:9335173_rs72641831	SPSB1	0.242834	4.65106	1.9566e-05	0.00779889	1.9566e-05	0.022	0.0315638
chr18:77156103_rs71359461	NFATC1	-0.139422	-4.64845	1.97472e-05	0.0108001	1.97472e-05	0.022	0.0315638
chr8:72754342_rs900126	TRPA1	-0.329846	-4.60125	2.33165e-05	0.0105923	2.33165e-05	0.022	0.0315638
chr1:10643829_rs12045923	CASZ1	-0.201094	-4.59539	2.38015e-05	0.00906845	2.38015e-05	0.022	0.0315638
chr8:24208018_rs11779651	ADAMDEC1	0.684773	4.58429	2.47477e-05	0.0110446	2.47477e-05	0.022	0.0315638
chr5:125807026_rs4529191	LMNB1	0.206511	4.57871	2.52368e-05	0.00913979	2.52368e-05	0.022	0.0315638
chr7:100327089_rs4727462	GIGYF1	0.0949692	4.53255	2.96613e-05	0.00809315	2.96613e-05	0.022	0.0315638
chr11:61988127_rs1729388	HNRNPUL2-BSCL2	0.031465	4.50547	3.25995e-05	0.0109941	3.25995e-05	0.022	0.0315638
chr1:28273422_rs11589716	RPA2	0.117651	4.50402	3.27646e-05	0.0115817	3.27646e-05	0.022	0.0315638
chr6:34503739_rs78121911	PPARD	-0.122888	-4.48526	3.4976e-05	0.00824286	3.4976e-05	0.022	0.0315638
chr4:1904354_rs13148597	IDUA	-0.53335	-4.46404	3.76521e-05	0.016046	3.76521e-05	0.022	0.0315638
chr22:41684003_rs6002312	RANGAP1	-0.0506042	-4.31048	6.39198e-05	0.0266911	6.39198e-05	0.022	0.0315638
chr2:130886577_rs142445573	MZT2B	-0.249697	-4.30899	6.42468e-05	0.0200389	6.42468e-05	0.022	0.0315638
chr1:150255587_rs2147324	C1orf54	-0.0987198	-4.14068	0.000113684	0.0294922	0.000113684	0.022	0.0315638
chr1:19457734_rs67443992	UBR4	-0.0695261	-4.78968	1.1965e-05	0.00525134	1.1965e-05	0.023	0.0325467
chr4:6646046_rs4340860	MRFAP1	-0.0394368	-4.74103	1.4228e-05	0.00752452	1.4228e-05	0.023	0.0325467
chr10:16951026_rs780801	VIM	-0.077555	-4.71913	1.53783e-05	0.00582223	1.53783e-05	0.023	0.0325467
chr2:54206463_rs2884254	PSME4	0.0528005	4.71796	1.54423e-05	0.00691044	1.54423e-05	0.023	0.0325467
chr22:19322037_rs1210693	MRPL40	-0.0925484	-4.70367	1.62449e-05	0.00927277	1.62449e-05	0.023	0.0325467
chr18:9780846_rs9960703	NDUFV2	0.065479	4.69558	1.67174e-05	0.0099417	1.67174e-05	0.023	0.0325467
chr2:32885887_rs2952843	MEMO1	0.0480003	4.68355	1.74444e-05	0.00758388	1.74444e-05	0.023	0.0325467
chr3:17846774_rs112798970	TBC1D5	0.128536	4.63489	2.07141e-05	0.00764104	2.07141e-05	0.023	0.0325467
chr7:134859532_rs292521	WDR91	0.0972079	4.63434	2.07538e-05	0.00606983	2.07538e-05	0.023	0.0325467
chr3:105545098_rs6782206	ALCAM	-0.175345	-4.60716	2.28376e-05	0.00810957	2.28376e-05	0.023	0.0325467
chr12:107348709_rs3741889	CKAP4	0.816951	4.59896	2.35049e-05	0.012481	2.35049e-05	0.023	0.0325467
chr17:80543375_rs72862401	FOXK2	-0.131318	-4.58782	2.44424e-05	0.0117998	2.44424e-05	0.023	0.0325467
chr22:25253264_rs139695	CABIN1	0.18514	4.58053	2.50759e-05	0.013248	2.50759e-05	0.023	0.0325467
chr14:59911454_rs1271512	RTN1	0.238462	4.5561	2.73172e-05	0.0119252	2.73172e-05	0.023	0.0325467
chr9:126685609_rs12115297	DENND1A	0.108851	4.55001	2.79048e-05	0.0131015	2.79048e-05	0.023	0.0325467
chr12:133349893_rs3741484	GOLGA3	0.092205	4.51816	3.11895e-05	0.0154688	3.11895e-05	0.023	0.0325467
chr7:123104114_rs1525628	WASL	0.095972	4.50929	3.21689e-05	0.00868825	3.21689e-05	0.023	0.0325467
chr7:87844952_rs4141354	SRI	0.0909253	4.50043	3.31774e-05	0.00891888	3.31774e-05	0.023	0.0325467
chr18:44718130_rs111987322	HDHD2	-0.11839	-4.49758	3.35078e-05	0.0156755	3.35078e-05	0.023	0.0325467
chr11:62031859_rs11607261	SLC3A2	0.14625	4.48739	3.47176e-05	0.0115694	3.47176e-05	0.023	0.0325467
chr5:134759527_rs13158375	H2AFY	-0.0769526	-4.48181	3.53987e-05	0.0119049	3.53987e-05	0.023	0.0325467
chr2:157856323_rs6732936	CYTIP	-0.0980463	-4.47011	3.68667e-05	0.0131998	3.68667e-05	0.023	0.0325467
chr16:21742690_rs57582465	RRN3P1	-0.521223	-4.44245	4.05802e-05	0.0171535	4.05802e-05	0.023	0.0325467
chr5:68443553_rs147401743	CENPH	0.257212	4.38359	4.97308e-05	0.0150503	4.97308e-05	0.023	0.0325467
chr17:45169760_rs4520895	ARL17	0.418417	4.34587	5.66191e-05	0.0220205	5.66191e-05	0.023	0.0325467
chr3:48938762_rs11712982	PRKAR2A	0.0699485	3.99477	0.000184886	0.0382442	0.000184886	0.023	0.0325467
chr20:3871897_rs61520848	PANK2	-0.0811339	-4.83767	1.00797e-05	0.00555767	1.00797e-05	0.024	0.0336254
chr19:49740420_rs1175821	HSD17B14	-0.298731	-4.7814	1.23237e-05	0.00847076	1.23237e-05	0.024	0.0336254
chr19:3062857_rs11539938	AES	0.227499	4.74953	1.38047e-05	0.00929543	1.38047e-05	0.024	0.0336254
chr15:67872983_rs7172298	AAGAB	0.0511412	4.7296	1.48174e-05	0.00581092	1.48174e-05	0.024	0.0336254
chr3:31685031_rs57047442	STT3B	-0.0463648	-4.71157	1.57965e-05	0.00620814	1.57965e-05	0.024	0.0336254
chr20:3660926_rs4987243	CDC25B	-0.385633	-4.68632	1.72744e-05	0.00856968	1.72744e-05	0.024	0.0336254
chr3:124496529_rs62265637	ITGB5	-0.365871	-4.68464	1.73769e-05	0.00671798	1.73769e-05	0.024	0.0336254
chr16:423813_rs28461437	TMEM8A	0.110539	4.62397	2.15262e-05	0.0104425	2.15262e-05	0.024	0.0336254
chr17:4339956_rs62066154	ATP2A3	-0.147131	-4.60967	2.26364e-05	0.0111048	2.26364e-05	0.024	0.0336254
chr7:131370039_rs11761231	MKLN1	0.0437959	4.56514	2.64654e-05	0.00736433	2.64654e-05	0.024	0.0336254
chr3:118979065_rs2717265	B4GALT4	-0.155978	-4.52859	3.00737e-05	0.00980421	3.00737e-05	0.024	0.0336254
chr21:37592741_rs2835321	DOPEY2	-0.097509	-4.52602	3.03453e-05	0.0106474	3.03453e-05	0.024	0.0336254
chr7:131944273_rs10954368	CHCHD3	0.183751	4.52558	3.03915e-05	0.00827173	3.03915e-05	0.024	0.0336254
chr2:216607387_rs4674022	FN1	0.865378	4.51396	3.16494e-05	0.0118072	3.16494e-05	0.024	0.0336254
chr9:127800099_rs607986	GOLGA1	0.0543104	4.4684	3.70866e-05	0.0160117	3.70866e-05	0.024	0.0336254
chr7:56011150_rs10266902	CCT6A	-0.0344605	-4.33015	5.97566e-05	0.0142619	5.97566e-05	0.024	0.0336254
chr19:22781201_rs4932779	ZNF91	-0.267693	-4.32258	6.13269e-05	0.0306516	6.13269e-05	0.024	0.0336254
chr16:30473649_rs7186331	2018-09-01	1899-12-29 16:08:53	-4.13526	0.000115774	0.0378178	0.000115774	0.024	0.0336254
chr16:30648503_rs6565194	TBC1D10B	0.0415803	4.12915	0.000118172	0.0383115	0.000118172	0.024	0.0336254
chr22:24814403_rs28407443	GGT5	0.379337	4.92384	7.39713e-06	0.00485942	7.39713e-06	0.025	0.0347906
chr19:1776556_rs4807141	CIRBP	0.0803863	4.70081	1.64103e-05	0.0107559	1.64103e-05	0.025	0.0347906
chr8:22103714_rs7013112	PPP3CC	0.229442	4.69741	1.66094e-05	0.0082743	1.66094e-05	0.025	0.0347906
chr12:105564229_rs1196870	APPL2	0.1322	4.64575	1.99362e-05	0.0108875	1.99362e-05	0.025	0.0347906
chr20:1011268_rs13041030	RBCK1	-0.0715978	-4.6368	2.05752e-05	0.00980505	2.05752e-05	0.025	0.0347906
chr1:38024054_rs4653300	SNIP1	0.0740435	4.62323	2.15822e-05	0.00845341	2.15822e-05	0.025	0.0347906
chr1:24245878_rs28488437	FUCA1	0.491679	4.56741	2.62556e-05	0.00979222	2.62556e-05	0.025	0.0347906
chr17:55234104_rs76953998	SCPEP1	-0.161768	-4.55606	2.73203e-05	0.0128169	2.73203e-05	0.025	0.0347906
chr10:122972170_rs12268161	WDR11	-0.0697558	-4.54837	2.80652e-05	0.00935005	2.80652e-05	0.025	0.0347906
chr15:72088897_rs149583894	CELF6	-0.214752	-4.46265	3.78343e-05	0.0120538	3.78343e-05	0.025	0.0347906
chr11:60014415_rs1820426	MS4A6E	1.11809	4.44673	3.9983e-05	0.0130071	3.9983e-05	0.025	0.0347906
chr6:119064530_rs12205421	ASF1A	-0.120903	-4.42916	4.24902e-05	0.00965233	4.24902e-05	0.025	0.0347906
chr8:42679444_rs35021392	FNTA	0.0660436	4.01778	0.00017133	0.0456953	0.00017133	0.025	0.0347906
chr1:60203127_rs113175253	FGGY	-0.55071	-4.90133	8.02135e-06	0.00374494	8.02135e-06	0.026	0.0357564
chr20:55975714_rs6014987	RBM38	0.128121	4.80395	1.13712e-05	0.00611684	1.13712e-05	0.026	0.0357564
chr2:29554958_rs13013613	LBH	0.418329	4.74384	1.40864e-05	0.00643952	1.40864e-05	0.026	0.0357564
chr10:126038055_rs72835536	CHST15	0.363734	4.73951	1.43052e-05	0.00548685	1.43052e-05	0.026	0.0357564
chr9:27599607_rs1838431	C9orf72	0.125018	4.69032	1.70314e-05	0.00874449	1.70314e-05	0.026	0.0357564
chr19:50798679_rs113890379	PTOV1	0.131822	4.68314	1.74697e-05	0.0113058	1.74697e-05	0.026	0.0357564
chr15:25047461_rs12914028	UBE3A	0.0627309	4.6667	1.85148e-05	0.00691237	1.85148e-05	0.026	0.0357564
chr20:46290250_rs2281279	SULF2	0.205123	4.64891	1.97152e-05	0.00949749	1.97152e-05	0.026	0.0357564
chr2:53974223_rs12613353	ASB3	-0.113707	-4.62634	2.13475e-05	0.00880773	2.13475e-05	0.026	0.0357564
chr10:90940325_rs2841029	CH25H	1.0167	4.60856	2.27254e-05	0.00793185	2.27254e-05	0.026	0.0357564
chr12:107353595_rs10746071	C12orf23	0.134484	4.59357	2.39538e-05	0.0126641	2.39538e-05	0.026	0.0357564
chr16:56432112_rs113425307	OGFOD1	0.0696336	4.58688	2.45233e-05	0.0115849	2.45233e-05	0.026	0.0357564
chr7:24229317_rs59180320	TRA2A	0.12206	4.58644	2.45614e-05	0.00693418	2.45614e-05	0.026	0.0357564
chr9:95934431_rs34739795	PHF2	-0.0511817	-4.58172	2.49711e-05	0.0119916	2.49711e-05	0.026	0.0357564
chr3:127604713_rs6763473	SEC61A1	0.032912	4.55926	2.70166e-05	0.00912557	2.70166e-05	0.026	0.0357564
chr1:36676712_rs12731453	MAP7D1	-0.146159	-4.52898	3.00328e-05	0.0108121	3.00328e-05	0.026	0.0357564
chr5:122129956_rs2112682	SNX24	-0.121641	-4.51995	3.09946e-05	0.0107617	3.09946e-05	0.026	0.0357564
chr4:75253143_rs1017736	EREG	-0.485258	-4.49664	3.36182e-05	0.0147775	3.36182e-05	0.026	0.0357564
chr1:156295453_rs61814799	UBQLN4	0.0556121	4.4419	4.06575e-05	0.0136934	4.06575e-05	0.026	0.0357564
chr20:31093514_rs6141314	TM9SF4	-0.0408662	-4.33426	5.89191e-05	0.0217862	5.89191e-05	0.026	0.0357564
chr3:129020778_rs6765930	H1FX	-0.110238	-4.29146	6.82114e-05	0.0185984	6.82114e-05	0.026	0.0357564
chr1:910394_rs28477686	TNFRSF4	-1.05165	-4.26426	7.48407e-05	0.0214916	7.48407e-05	0.026	0.0357564
chr8:67344690_rs4737796	LOC100505676	-0.179227	-4.25848	7.63278e-05	0.025361	7.63278e-05	0.026	0.0357564
chr8:19603700_rs7017170	INTS10	-0.0560244	-4.76864	1.28969e-05	0.00688892	1.28969e-05	0.027	0.0369237
chr3:32625129_rs6783563	DYNC1LI1	-0.0933292	-4.69554	1.67195e-05	0.00649517	1.67195e-05	0.027	0.0369237
chr7:2342386_rs4544983	FTSJ2	-0.109907	-4.62135	2.17258e-05	0.00631366	2.17258e-05	0.027	0.0369237
chr16:11890634_rs79061411	ZC3H7A	0.0935275	4.61919	2.18917e-05	0.0105617	2.18917e-05	0.027	0.0369237
chr8:21616980_rs148653351	DOK2	-0.145369	-4.5814	2.49997e-05	0.0111337	2.49997e-05	0.027	0.0369237
chr5:72018529_rs2663073	MRPS27	0.167862	4.52297	3.06696e-05	0.0106998	3.06696e-05	0.027	0.0369237
chr4:170549935_rs11937417	CLCN3	-0.0438896	-4.50555	3.25914e-05	0.0144905	3.25914e-05	0.027	0.0369237
chr11:64582108_rs679485	MARK2	0.0917008	4.50226	3.29664e-05	0.0110889	3.29664e-05	0.027	0.0369237
chr1:41090250_rs7520333	NFYC	-0.0490829	-4.48291	3.52628e-05	0.0122849	3.52628e-05	0.027	0.0369237
chr1:196597973_rs12118829	CFH	0.248404	4.31471	6.30015e-05	0.0188565	6.30015e-05	0.027	0.0369237
chr17:19869426_rs73980762	AKAP10	-0.0778862	-4.29139	6.82286e-05	0.025323	6.82286e-05	0.027	0.0369237
chr11:12507437_rs10831833	USP47	0.0471109	4.75054	1.37551e-05	0.00536087	1.37551e-05	0.028	0.0379629
chr15:60841275_rs2028122	ANXA2	-0.0795607	-4.64188	2.02099e-05	0.00735244	2.02099e-05	0.028	0.0379629
chr7:150948000_rs4726010	CHPF2	0.081051	4.59393	2.39237e-05	0.00679068	2.39237e-05	0.028	0.0379629
chr16:74746689_rs4888279	TERF2IP	-0.054507	-4.58705	2.45092e-05	0.0115804	2.45092e-05	0.028	0.0379629
chr13:38926390_rs2485788	UFM1	-0.0615972	-4.55446	2.74744e-05	0.0180494	2.74744e-05	0.028	0.0379629
chr16:981861_rs4984720	NUBP2	-0.0653684	-4.52342	3.06224e-05	0.0137857	3.06224e-05	0.028	0.0379629
chr20:44538427_rs378114	MMP9	-0.278088	-4.50397	3.27705e-05	0.0140721	3.27705e-05	0.028	0.0379629
chr2:75027658_rs6546928	DCTN1	-0.0570352	-4.47683	3.60167e-05	0.0129926	3.60167e-05	0.028	0.0379629
chr11:33284326_rs267447	EIF3M	-0.0784674	-4.46879	3.70363e-05	0.0122072	3.70363e-05	0.028	0.0379629
chr1:154600998_rs884617	FAM189B	-0.0419527	-4.41605	4.44621e-05	0.0145625	4.44621e-05	0.028	0.0379629
chr1:47076599_rs11211325	MKNK1	-0.0879105	-4.41253	4.5005e-05	0.0146862	4.5005e-05	0.028	0.0379629
chr11:67799926_rs2075626	NDUFS8	-0.0752686	-4.39841	4.72534e-05	0.014908	4.72534e-05	0.028	0.0379629
chr15:45446429_rs2271436	DUOXA1	0.207095	4.38171	5.00533e-05	0.0151142	5.00533e-05	0.028	0.0379629
chr12:45774699_rs12321278	ANO6	0.0786362	4.36546	5.29327e-05	0.0231955	5.29327e-05	0.028	0.0379629
chr3:98379417_rs72926891	CPOX	-0.141135	-4.36476	5.30618e-05	0.0153831	5.30618e-05	0.028	0.0379629
chr9:130965235_rs10760548	DNM1	0.288159	4.35555	5.4768e-05	0.0217151	5.4768e-05	0.028	0.0379629
chr12:121602469_rs2051550	ACADS	0.225594	4.33601	5.85682e-05	0.0251765	5.85682e-05	0.028	0.0379629
chr16:4884368_rs7189135	UBN1	-0.0516474	-4.81567	1.09047e-05	0.00607184	1.09047e-05	0.029	0.0389065
chr5:54817958_rs6861871	PPAP2A	0.20661	4.74716	1.39215e-05	0.00580707	1.39215e-05	0.029	0.0389065
chr8:125772430_rs57967353	MTSS1	0.171888	4.70958	1.5908e-05	0.00800921	1.5908e-05	0.029	0.0389065
chr11:118889810_rs3802884	RPS25	0.12673	4.68458	1.73811e-05	0.00655175	1.73811e-05	0.029	0.0389065
chr1:159265062_rs2427824	PYHIN1	-0.801665	-4.63036	2.10474e-05	0.00828634	2.10474e-05	0.029	0.0389065
chr19:49040098_rs8103233	KDELR1	-0.0610639	-4.59072	2.41948e-05	0.0147602	2.41948e-05	0.029	0.0389065
chr9:35689949_rs117790517	TPM2	0.384801	4.58646	2.456e-05	0.011831	2.456e-05	0.029	0.0389065
chr5:112244037_rs468751	APC	0.0551904	4.57459	2.56037e-05	0.00924313	2.56037e-05	0.029	0.0389065
chr9:5460801_rs7048841	CD274	-0.0938621	-4.57212	2.5826e-05	0.0123208	2.5826e-05	0.029	0.0389065
chr18:12513723_rs113453897	PSMG2	0.0717396	4.54808	2.80938e-05	0.0138588	2.80938e-05	0.029	0.0389065
chr1:23546483_rs7533119	KDM1A	-0.0684077	-4.5144	3.16003e-05	0.011254	3.16003e-05	0.029	0.0389065
chr1:87554612_rs1778013	HS2ST1	-0.0967139	-4.51276	3.17824e-05	0.0113031	3.17824e-05	0.029	0.0389065
chr6:158635064_rs9364853	GTF2H5	0.149646	4.49277	3.40743e-05	0.00806627	3.40743e-05	0.029	0.0389065
chr11:61616977_rs174590	FADS3	-0.253738	-4.46795	3.71452e-05	0.0122394	3.71452e-05	0.029	0.0389065
chr17:2296681_rs72805727	PAFAH1B1	0.0832723	4.45167	3.93038e-05	0.0170169	3.93038e-05	0.029	0.0389065
chr6:47439428_rs74955748	CD2AP	-0.25255	-4.34996	5.58304e-05	0.0121309	5.58304e-05	0.029	0.0389065
chr5:139009862_rs4912729	SLC35A4	0.0405356	4.34411	5.69625e-05	0.0165603	5.69625e-05	0.029	0.0389065
[truncated: 184 more rows]

## Sheet: flu 40PCs
SNP	gene	beta	t-stat	p-value	FDR	gene.p.min.p	emp.p	emp.q
chr14:65375444_rs10142016	CHURC1-FNTB	-0.669648	-66.0693	1.40711e-131	2.82478e-125	1.40711e-131	0.001	0.000358658
chr4:122722368_rs3828485	EXOSC9	-0.655581	-46.2058	3.11092e-104	7.6586e-98	3.11092e-104	0.001	0.000358658
chr16:23681165_rs7588	DCTN5	-0.532396	-41.6869	1.30186e-96	1.32718e-90	1.30186e-96	0.001	0.000358658
chr17:33571546_rs11080327	SLFN5	-0.889352	-38.3613	1.45424e-90	4.80949e-84	1.45424e-90	0.001	0.000358658
chr7:26149563_rs62446333	NFE2L3	0.861354	35.0625	3.78244e-84	5.76001e-78	3.78244e-84	0.001	0.000358658
chr8:27238826_rs11785606	PTK2B	0.756567	34.3246	1.1857e-82	1.38414e-76	1.1857e-82	0.001	0.000358658
chr1:89478624_rs12136765	GBP3	1.46098	32.8831	1.16317e-79	9.66912e-74	1.16317e-79	0.001	0.000358658
chr10:18948072_rs11015435	ARL5B	0.950952	32.0393	7.24966e-78	3.59766e-72	7.24966e-78	0.001	0.000358658
chr10:27393142_rs4018760	MASTL	0.262663	31.9462	1.1492e-77	3.59766e-72	1.1492e-77	0.001	0.000358658
chr7:150461004_rs4725938	AK125599	1.46392	31.9258	1.27105e-77	1.21065e-72	1.27105e-77	0.001	0.000358658
chr8:82719822_rs2600600	SNX16	-0.591308	-31.6343	5.41248e-77	1.04016e-71	5.41248e-77	0.001	0.000358658
chr15:42202647_rs28547280	SPTBN5	0.845869	31.4391	1.43537e-76	2.65418e-70	1.43537e-76	0.001	0.000358658
chr11:43878485_rs57635800	HSD17B12	0.447976	30.7672	4.25302e-75	6.97877e-69	4.25302e-75	0.001	0.000358658
chr1:226266029_rs4271181	H3F3A	0.604312	30.7636	4.33097e-75	5.65103e-70	4.33097e-75	0.001	0.000358658
chr18:33736845_rs1789508	ELP2	-0.393102	-30.752	4.59255e-75	4.31057e-70	4.59255e-75	0.001	0.000358658
chr14:92587330_rs60324130	CPSF2	0.329955	30.6909	6.26714e-75	2.28751e-70	6.26714e-75	0.001	0.000358658
chr4:48258598_rs12501146	TEC	0.600768	30.3908	2.90102e-74	2.04053e-69	2.90102e-74	0.001	0.000358658
chr2:101710370_rs62155199	TBC1D8	-1.31371	-30.2315	6.56954e-74	7.69163e-68	6.56954e-74	0.001	0.000358658
chr10:112683868_rs73343848	SHOC2	-0.381812	-29.9052	3.53676e-73	2.38527e-68	3.53676e-73	0.001	0.000358658
chr4:17582051_rs3796812	LAP3	0.230162	29.7687	7.17701e-73	4.30943e-68	7.17701e-73	0.001	0.000358658
chr1:46825433_rs56063031	NSUN4	0.385515	29.7576	7.60315e-73	8.84223e-68	7.60315e-73	0.001	0.000358658
chr1:201954731_rs6702211	RNPEP	-0.417255	-29.1013	2.357e-71	6.24215e-67	2.357e-71	0.001	0.000358658
chr11:9328743_rs4282978	TMEM41B	0.393886	29.0949	2.43702e-71	1.95948e-65	2.43702e-71	0.001	0.000358658
chr6:32834229_rs116050708	PSMB9	-0.26637	-28.9739	4.61513e-71	3.3764e-66	4.61513e-71	0.001	0.000358658
chr2:238869884_rs6723077	UBE2F-SCLY	0.30736	28.9509	5.21326e-71	9.60551e-66	5.21326e-71	0.001	0.000358658
chr13:60998419_rs61970123	TDRD3	-1.34746	-28.923	6.04283e-71	7.08731e-65	6.04283e-71	0.001	0.000358658
chr20:3467189_rs238728	ATRN	1.04388	28.8223	1.02982e-70	1.24192e-65	1.02982e-70	0.001	0.000358658
chr1:158224282_rs366316	CD1A	1.11534	28.6997	1.97421e-70	4.5134e-66	1.97421e-70	0.001	0.000358658
chr10:11227668_rs656176	CELF2	0.417503	28.6764	2.2352e-70	1.06409e-65	2.2352e-70	0.001	0.000358658
chr7:93618979_rs57401807	BET1	0.308666	28.3863	1.05089e-69	6.77365e-65	1.05089e-69	0.001	0.000358658
chr11:833589_rs7947690	CD151	-0.586368	-28.3283	1.43363e-69	5.76353e-64	1.43363e-69	0.001	0.000358658
chr13:43597706_rs17553284	DNAJC15	0.36115	28.1795	3.18826e-69	1.32889e-63	3.18826e-69	0.001	0.000358658
chr17:48624523_rs9890200	SPATA20	0.996298	28.17	3.35513e-69	1.84936e-63	3.35513e-69	0.001	0.000358658
chr3:134205227_rs1863912	ANAPC13	-0.344698	-28.0702	5.74312e-69	5.67118e-63	5.74312e-69	0.001	0.000358658
chr3:48508585_rs11797	ATRIP	0.327136	27.9186	1.30184e-68	5.67118e-63	1.30184e-68	0.001	0.000358658
chr1:23432346_rs1208930	LUZP1	-0.388956	-27.8142	2.29099e-68	4.9221e-64	2.29099e-68	0.001	0.000358658
chr17:73844748_rs2290771	UNC13D	0.369301	27.1822	7.22104e-67	2.37836e-61	7.22104e-67	0.001	0.000358658
chr4:57360635_rs4864585	SRP72	0.263232	27.1431	8.95253e-67	4.15843e-62	8.95253e-67	0.001	0.000358658
chr11:66102769_rs7950463	RIN1	1.15028	26.9382	2.7711e-66	1.15746e-61	2.7711e-66	0.001	0.000358658
chr14:78023519_rs2272587	SPTLC2	0.368585	26.7068	9.98753e-66	2.53797e-61	9.98753e-66	0.001	0.000358658
chr2:218936037_rs4074802	RUFY4	-0.486386	-26.6458	1.40217e-65	2.34866e-60	1.40217e-65	0.001	0.000358658
chr5:96133920_rs26490	ERAP1	0.53881	26.5184	2.85106e-65	7.42316e-59	2.85106e-65	0.001	0.000358658
chr2:101123490_rs11891670	PDCL3	-0.975632	-26.4274	4.73828e-65	6.74982e-60	4.73828e-65	0.001	0.000358658
chr7:87933459_rs4545016	STEAP4	-3.24792	-26.4054	5.35746e-65	2.43275e-60	5.35746e-65	0.001	0.000358658
chr17:39979062_rs1043002	NT5C3B	1.32618	26.3788	6.2195e-65	5.06477e-60	6.2195e-65	0.001	0.000358658
chr18:51700391_rs8094493	MBD2	-0.235481	-26.3558	7.07393e-65	2.83098e-60	7.07393e-65	0.001	0.000358658
chr22:45783722_rs136592	FAM118A	-0.768103	-26.3248	8.41398e-65	2.6411e-60	8.41398e-65	0.001	0.000358658
chr14:31091758_rs229143	SCFD1	0.205303	26.2705	1.14069e-64	2.86243e-60	1.14069e-64	0.001	0.000358658
chr6:111225883_rs1279469	AMD1	0.39017	26.211	1.5927e-64	3.7309e-60	1.5927e-64	0.001	0.000358658
chr17:4829987_rs4349206	GP1BA	1.55458	25.8324	1.34738e-63	7.1872e-59	1.34738e-63	0.001	0.000358658
chr20:34284689_rs6060564	CPNE1	0.256834	25.723	2.50457e-63	8.64853e-59	2.50457e-63	0.001	0.000358658
chr20:17950545_rs11551768	MGME1	0.545214	25.717	2.59257e-63	8.75347e-59	2.59257e-63	0.001	0.000358658
chr15:40853692_rs11629711	C15orf57	0.339629	25.4707	1.05332e-62	4.86929e-57	1.05332e-62	0.001	0.000358658
chr7:26146063_rs916964	HNRNPA2B1	0.164442	25.3604	1.97761e-62	7.48399e-58	1.97761e-62	0.001	0.000358658
chr1:33201327_rs112204683	KIAA1522	1.11064	25.3181	2.51946e-62	4.31995e-58	2.51946e-62	0.001	0.000358658
chr6:71384916_rs781988	SMAP1	-0.473447	-25.1276	7.5187e-62	1.4888e-57	7.5187e-62	0.001	0.000358658
chr3:56841087_rs13321277	ARHGEF3	0.633347	25.0905	9.30824e-62	8.2614e-57	9.30824e-62	0.001	0.000358658
chr22:37970189_rs5756736	LGALS2	1.84433	25.026	1.34927e-61	2.80365e-57	1.34927e-61	0.001	0.000358658
chr2:223167710_rs6436310	CCDC140	-1.21531	-24.9841	1.71879e-61	1.58345e-56	1.71879e-61	0.001	0.000358658
chr7:134854615_rs6969894	C7orf49	0.36135	24.8987	2.81346e-61	9.51071e-57	2.81346e-61	0.001	0.000358658
chr19:8387207_rs1057232	RPS28	2.69717	24.8691	3.33859e-61	1.63883e-54	3.33859e-61	0.001	0.000358658
chr16:84209816_rs2288022	TAF1C	-0.470799	-24.7246	7.71005e-61	9.62452e-56	7.71005e-61	0.001	0.000358658
chr3:14981262_rs6442490	FGD5-AS1	-0.202354	-24.5743	1.84593e-60	9.57718e-56	1.84593e-60	0.001	0.000358658
chr11:30315627_rs7102836	ARL14EP	0.409245	24.0692	3.54853e-59	1.21412e-54	3.54853e-59	0.001	0.000358658
chr3:49853073_rs6775384	UBA7	-0.181077	-24.0612	3.71921e-59	1.1106e-54	3.71921e-59	0.001	0.000358658
chr19:12497383_rs59975010	ZNF799	-0.987511	-24.0348	4.34416e-59	5.3311e-53	4.34416e-59	0.001	0.000358658
chr6:138725829_rs56015157	HEBP2	1.01612	23.9328	7.92514e-59	9.66121e-55	7.92514e-59	0.001	0.000358658
chr2:69799971_rs7579933	AAK1	0.360862	23.7313	2.6089e-58	1.71676e-53	2.6089e-58	0.001	0.000358658
chr2:61372298_rs3213944	C2orf74	-0.704089	-23.6763	3.61394e-58	2.3364e-53	3.61394e-58	0.001	0.000358658
chr6:86223316_rs12203963	SNHG5	-0.41898	-23.6346	4.63102e-58	5.18679e-54	4.63102e-58	0.001	0.000358658
chr12:6493351_rs10849448	LTBR	0.371986	23.6011	5.64974e-58	1.5768e-51	5.64974e-58	0.001	0.000358658
chr2:109058119_rs2683808	GCC2	0.303731	23.5391	8.16659e-58	5.01569e-53	8.16659e-58	0.001	0.000358658
chr11:60145822_rs2233239	MS4A14	-0.819537	-23.468	1.24746e-57	3.40005e-53	1.24746e-57	0.001	0.000358658
chr1:182136401_rs61805075	GLUL	-0.417026	-23.4495	1.39315e-57	2.16653e-53	1.39315e-57	0.001	0.000358658
chr11:2502582_rs11022998	KCNQ1	0.687549	23.4417	1.45886e-57	3.94283e-53	1.45886e-57	0.001	0.000358658
chr4:2815632_rs433030	SH3BP2	-0.336302	-23.2338	5.05248e-57	8.82157e-53	5.05248e-57	0.001	0.000358658
chr22:41604399_rs4820432	L3MBTL2	-0.311885	-23.2202	5.48405e-57	7.93201e-53	5.48405e-57	0.001	0.000358658
chr12:93863425_rs10777514	MRPL42	-0.30761	-23.2057	5.97932e-57	1.5768e-51	5.97932e-57	0.001	0.000358658
chr17:1414143_rs117763993	PITPNA	-0.353067	-23.2011	6.14873e-57	1.73805e-52	6.14873e-57	0.001	0.000358658
chr16:23528126_rs77290929	UBFD1	0.520944	23.1757	7.15645e-57	5.38788e-52	7.15645e-57	0.001	0.000358658
chr20:48319572_rs6012716	B4GALT5	0.208274	23.1393	8.90594e-57	1.0098e-52	8.90594e-57	0.001	0.000358658
chr8:23082971_rs79037040	TNFRSF10A	0.427342	23.1045	1.09706e-56	3.69229e-52	1.09706e-56	0.001	0.000358658
chr6:33546930_rs210143	BAK1	0.369092	23.0778	1.28789e-56	1.31132e-52	1.28789e-56	0.001	0.000358658
chr8:145621556_rs2280836	CPSF1	0.381116	22.8689	4.53291e-56	1.50176e-51	4.53291e-56	0.001	0.000358658
chr9:114433650_rs7872235	DNAJC25-GNG10	0.271176	22.8395	5.41239e-56	7.03793e-50	5.41239e-56	0.001	0.000358658
chr17:74705876_rs9303003	MXRA7	2.32001	22.823	5.98042e-56	1.55737e-51	5.98042e-56	0.001	0.000358658
chr14:24099198_rs222726	DHRS2	1.3119	22.808	6.54656e-56	8.64952e-52	6.54656e-56	0.001	0.000358658
chr7:55821556_rs10249231	CO9	-1.12062	-22.6182	2.06517e-55	2.37096e-51	2.06517e-55	0.001	0.000358658
chr17:80419724_rs11077995	NARF	0.301241	22.5818	2.57604e-55	6.21863e-51	2.57604e-55	0.001	0.000358658
chr10:79336052_rs2619608	KCNMA1	-1.22872	-22.5449	3.22292e-55	3.61348e-51	3.22292e-55	0.001	0.000358658
chr12:107341840_rs4964505	C12orf23	0.339918	22.5421	3.27971e-55	4.70667e-50	3.27971e-55	0.001	0.000358658
chr7:134859545_rs292522	WDR91	0.479325	22.499	4.25967e-55	4.78212e-51	4.25967e-55	0.001	0.000358658
chr9:74379961_rs923704	TMEM2	0.45591	22.4873	4.57462e-55	3.64996e-49	4.57462e-55	0.001	0.000358658
chr7:95911205_rs9649201	SLC25A13	0.369005	22.4658	5.2133e-55	5.80984e-51	5.2133e-55	0.001	0.000358658
chr1:11784118_rs7529001	AGTRAP	-0.710096	-22.372	9.23338e-55	1.38751e-50	9.23338e-55	0.001	0.000358658
chr19:30196777_rs73023464	C19orf12	-0.5751	-22.3169	1.29212e-54	6.54125e-49	1.29212e-54	0.001	0.000358658
chr20:1894315_rs6075339	AK093519	-3.19812	-22.3107	1.34229e-54	9.2282e-51	1.34229e-54	0.001	0.000358658
chr3:33860133_rs9828982	PDCD6IP	0.145442	22.2715	1.70526e-54	2.12833e-50	1.70526e-54	0.001	0.000358658
chr14:21539684_rs4982404	ARHGEF40	0.421893	22.171	3.15345e-54	3.72386e-50	3.15345e-54	0.001	0.000358658
chr10:13159362_rs58505537	OPTN	0.19283	22.037	7.17029e-54	7.07677e-50	7.17029e-54	0.001	0.000358658
chr1:75208034_rs28879157	CRYZ	0.581962	21.9142	1.52498e-53	2.2788e-49	1.52498e-53	0.001	0.000358658
chr9:113801441_rs10980701	LPAR1	2.06129	21.914	1.52728e-53	3.32338e-48	1.52728e-53	0.001	0.000358658
chr2:71050561_rs35856355	CLEC4F	1.40172	21.8972	1.69335e-53	4.274e-49	1.69335e-53	0.001	0.000358658
chr3:151983948_rs842049	MBNL1	0.151864	21.8591	2.14161e-53	2.56282e-49	2.14161e-53	0.001	0.000358658
chr22:39359517_rs2020232	APOBEC3G	-1.39686	-21.8079	2.93559e-53	2.60897e-49	2.93559e-53	0.001	0.000358658
chr6:26370365_rs34436535	BTN3A2	0.905814	21.7916	3.2461e-53	2.71826e-49	3.2461e-53	0.001	0.000358658
chr2:71299214_rs11677558	NAGK	0.238802	21.7264	4.85487e-53	9.82987e-49	4.85487e-53	0.001	0.000358658
chr17:80377406_rs4074069	HEXDC	-0.268491	-21.7161	5.17459e-53	8.11067e-49	5.17459e-53	0.001	0.000358658
chr6:31525184_rs3093949	LTA	-1.0831	-21.716	5.177e-53	4.24589e-49	5.177e-53	0.001	0.000358658
chr14:55381790_rs8022453	GCH1	-0.554413	-21.6948	5.90305e-53	6.54717e-49	5.90305e-53	0.001	0.000358658
chr22:26904965_rs2097470	TFIP11	0.307592	21.5955	1.09094e-52	9.43417e-49	1.09094e-52	0.001	0.000358658
chr9:32455320_rs7029002	DDX58	-0.226738	-21.4998	1.97507e-52	2.78092e-47	1.97507e-52	0.001	0.000358658
chr16:88011301_rs7206033	BANP	0.647047	21.4546	2.61464e-52	6.79248e-48	2.61464e-52	0.001	0.000358658
chr3:49090696_rs7373790	WDR6	1.0294	21.4309	3.02823e-52	3.50565e-48	3.02823e-52	0.001	0.000358658
chr1:39496819_rs10888639	NDUFS5	0.212031	21.3915	3.86928e-52	5.56433e-48	3.86928e-52	0.001	0.000358658
chr3:122426474_rs6793057	PARP14	-0.265437	-21.3604	4.69657e-52	5.41739e-48	4.69657e-52	0.001	0.000358658
chr9:107519327_rs7853255	NIPSNAP3A	0.573637	21.353	4.91621e-52	6.53751e-47	4.91621e-52	0.001	0.000358658
chr11:18549566_rs11024699	TSG101	-0.170371	-21.3165	6.16995e-52	1.17419e-47	6.16995e-52	0.001	0.000358658
chr7:22862183_rs2270107	TOMM7	0.17455	21.2298	1.05959e-51	9.00468e-48	1.05959e-51	0.001	0.000358658
chr5:6633222_rs4702373	NSUN2	-0.157001	-21.2173	1.14543e-51	1.16892e-46	1.14543e-51	0.001	0.000358658
chr14:59951982_rs1253105	JKAMP	-0.228147	-21.1822	1.42625e-51	1.41044e-47	1.42625e-51	0.001	0.000358658
chr17:38133792_rs60134943	GSDMA	1.42299	21.1108	2.2285e-51	3.23252e-47	2.2285e-51	0.001	0.000358658
chr22:37970189_rs5756736	CDC42EP1	0.827428	21.0583	3.09421e-51	2.49449e-47	3.09421e-51	0.001	0.000358658
chr1:67907806_rs4655710	SERBP1	-0.171838	-21.0507	3.24534e-51	4.53302e-47	3.24534e-51	0.001	0.000358658
chr5:150128362_rs10067648	SMIM3	-0.639584	-20.9656	5.53129e-51	5.22472e-46	5.53129e-51	0.001	0.000358658
chr2:10127774_rs7596288	GRHL1	-0.748416	-20.8854	9.15054e-51	1.28213e-46	9.15054e-51	0.001	0.000358658
chr5:74050144_rs189615836	NSA2	-0.286323	-20.8751	9.75993e-51	5.22472e-46	9.75993e-51	0.001	0.000358658
chr17:72278870_rs6501705	TTYH2	0.41992	20.7885	1.68299e-50	2.30955e-46	1.68299e-50	0.001	0.000358658
chr11:44087989_rs2074038	ACCS	-1.43011	-20.7295	2.43986e-50	4.1963e-46	2.43986e-50	0.001	0.000358658
chr17:7209386_rs28636077	EIF5A	0.109511	20.7067	2.81704e-50	3.83399e-46	2.81704e-50	0.001	0.000358658
chr11:8014479_rs4758267	EIF3F	0.20071	20.6797	3.34053e-50	5.71478e-46	3.34053e-50	0.001	0.000358658
chr17:45771037_rs8075566	TBKBP1	0.432266	20.6786	3.36179e-50	4.55663e-46	3.36179e-50	0.001	0.000358658
chr14:67979713_rs7156144	TMEM229B	-0.390644	-20.6533	3.94458e-50	3.72129e-46	3.94458e-50	0.001	0.000358658
chr16:5075248_rs15951	NAGPA	-0.297229	-20.642	4.23512e-50	9.41635e-46	4.23512e-50	0.001	0.000358658
chr19:50848025_rs59323905	NAPSB	1.16723	20.6224	4.79402e-50	9.78405e-45	4.79402e-50	0.001	0.000358658
chr20:44420637_rs2664539	DNTTIP1	-0.256824	-20.6015	5.47089e-50	3.00082e-46	5.47089e-50	0.001	0.000358658
chr6:123031399_rs9490530	PKIB	1.1768	20.5016	1.02864e-49	5.95586e-46	1.02864e-49	0.001	0.000358658
chr4:26989028_rs10019691	STIM2	-0.308185	-20.3832	2.17714e-49	2.83586e-45	2.17714e-49	0.001	0.000358658
chr12:8210697_rs2072448	C3AR1	-0.47278	-20.3747	2.29816e-49	1.61239e-44	2.29816e-49	0.001	0.000358658
chr19:9531693_rs11880207	ZNF266	-0.229772	-20.355	2.60478e-49	4.27829e-44	2.60478e-49	0.001	0.000358658
chr2:55881257_rs782567	PNPT1	0.131483	20.3228	3.19475e-49	3.99077e-45	3.19475e-49	0.001	0.000358658
chr1:101187219_rs3176860	VCAM1	1.26455	20.2998	3.69703e-49	3.95557e-45	3.69703e-49	0.001	0.000358658
chr14:96827247_rs4905485	GSKIP	-0.270262	-20.235	5.58017e-49	4.91324e-45	5.58017e-49	0.001	0.000358658
chr5:156890897_rs4704864	NIPAL4	1.88767	20.1714	8.3657e-49	2.44734e-44	8.3657e-49	0.001	0.000358658
chr5:10267766_rs2578643	CCT5	-0.148504	-20.1558	9.23719e-49	2.67227e-44	9.23719e-49	0.001	0.000358658
chr1:43414656_rs71654266	SLC2A1	-0.807104	-20.1245	1.12749e-48	1.1555e-44	1.12749e-48	0.001	0.000358658
chr9:114933834_rs10817276	MIR3134	0.35748	20.0504	1.80937e-48	1.66574e-43	1.80937e-48	0.001	0.000358658
chr2:242189231_rs12475607	2018-09-02	1899-12-29 18:45:36	-19.9591	3.24088e-48	3.4699e-44	3.24088e-48	0.001	0.000358658
chr2:128430669_rs34967118	LIMS2	-1.3988	-19.8487	6.56923e-48	6.85775e-44	6.56923e-48	0.001	0.000358658
chr22:37678551_rs3213556	CYTH4	0.324345	19.842	6.85457e-48	4.45488e-44	6.85457e-48	0.001	0.000358658
chr16:46738418_rs698416	MYLK3	0.984004	19.8087	8.48542e-48	1.63608e-43	8.48542e-48	0.001	0.000358658
chr4:68430123_rs2046599	STAP1	0.577452	19.789	9.62917e-48	1.13423e-43	9.62917e-48	0.001	0.000358658
chr11:18317458_rs2305564	HPS5	0.244043	19.7476	1.25593e-47	1.90533e-43	1.25593e-47	0.001	0.000358658
chr15:67521810_rs78553942	AAGAB	-0.232507	-19.7375	1.33993e-47	1.78251e-43	1.33993e-47	0.001	0.000358658
chr5:143550217_rs6864309	YIPF5	0.241937	19.7005	1.69921e-47	2.76509e-43	1.69921e-47	0.001	0.000358658
chr17:73844748_rs2290771	WBP2	0.161979	19.6984	1.72172e-47	1.92369e-43	1.72172e-47	0.001	0.000358658
chr6:6585976_rs9328370	LY86	-0.634476	-19.6934	1.77894e-47	8.41133e-44	1.77894e-47	0.001	0.000358658
chr8:17104188_rs117960717	CNOT7	-0.319313	-19.6846	1.88222e-47	4.15722e-43	1.88222e-47	0.001	0.000358658
chr9:131867130_rs10988207	PPP2R4	-0.134616	-19.643	2.4588e-47	1.9618e-42	2.4588e-47	0.001	0.000358658
chr10:102045459_rs61871345	BLOC1S2	-0.273732	-19.6046	3.14735e-47	1.50423e-43	3.14735e-47	0.001	0.000358658
chr9:86080178_rs116083862	FRMD3	1.15476	19.5917	3.41863e-47	2.63964e-42	3.41863e-47	0.001	0.000358658
chr11:9650750_rs715333	SWAP70	-0.316445	-19.5904	3.44865e-47	5.18296e-43	3.44865e-47	0.001	0.000358658
chr10:29098958_rs1775908	BAMBI	0.648646	19.5522	4.40944e-47	2.09917e-43	4.40944e-47	0.001	0.000358658
chr10:111658925_rs10884916	XPNPEP1	-0.153649	-19.5305	5.06963e-47	2.39935e-43	5.06963e-47	0.001	0.000358658
chr12:49573296_rs10875931	TUBA1A	0.303724	19.426	9.95006e-47	3.73979e-42	9.95006e-47	0.001	0.000358658
chr2:190526224_rs1132360	ASNSD1	-0.286972	-19.4242	1.00651e-46	9.46176e-43	1.00651e-46	0.001	0.000358658
chr9:132690663_rs10125881	FNBP1	0.194286	19.369	1.43762e-46	9.83172e-42	1.43762e-46	0.001	0.000358658
chr12:69752509_rs7136238	YEATS4	0.316759	19.2903	2.39102e-46	7.54891e-42	2.39102e-46	0.001	0.000358658
chr2:172659852_rs1474074	DYNC1I2	0.130676	19.2732	2.67081e-46	2.36587e-42	2.67081e-46	0.001	0.000358658
chr1:205215474_rs11240398	TMCC2	-0.853482	-19.2521	3.06158e-46	2.86837e-42	3.06158e-46	0.001	0.000358658
chr20:32398295_rs6087526	CHMP4B	0.114992	19.1954	4.41862e-46	1.75287e-42	4.41862e-46	0.001	0.000358658
chr15:90775913_rs8041338	CIB1	-0.228243	-19.1562	5.6989e-46	6.02168e-42	5.6989e-46	0.001	0.000358658
chr3:134205071_rs1874883	CEP63	-0.245534	-19.1213	7.14269e-46	5.3074e-42	7.14269e-46	0.001	0.000358658
chr19:39684764_rs58016205	NCCRP1	-1.03442	-19.109	7.73622e-46	3.85331e-41	7.73622e-46	0.001	0.000358658
chr1:53432786_rs56222568	SCP2	0.189479	19.1034	8.02494e-46	7.46621e-42	8.02494e-46	0.001	0.000358658
chr5:118368646_rs17144885	DMXL1	0.305665	19.0486	1.14555e-45	1.28561e-41	1.14555e-45	0.001	0.000358658
chr1:182974328_rs9787073	LAMC1	0.494778	19.033	1.26765e-45	1.1753e-41	1.26765e-45	0.001	0.000358658
chr1:234507977_rs6586384	COA6	-0.285312	-19.0185	1.39261e-45	1.28893e-41	1.39261e-45	0.001	0.000358658
chr11:65649984_rs687672	CTSW	-0.780867	-18.9534	2.12635e-45	2.87342e-41	2.12635e-45	0.001	0.000358658
chr10:27438713_rs2185808	YME1L1	-0.11669	-18.9178	2.68203e-45	1.14442e-41	2.68203e-45	0.001	0.000358658
chr19:47758145_rs7254371	CCDC9	0.394937	18.9132	2.76358e-45	1.17963e-40	2.76358e-45	0.001	0.000358658
chr11:5689144_rs11821656	TRIM5	0.210895	18.8932	3.14686e-45	4.11419e-41	3.14686e-45	0.001	0.000358658
chr4:68481933_rs4860853	UBA6	0.202003	18.8829	3.36515e-45	2.99078e-41	3.36515e-45	0.001	0.000358658
chr1:28537527_rs520800	DNAJC8	0.155008	18.8527	4.09852e-45	3.72253e-41	4.09852e-45	0.001	0.000358658
chr17:80679455_rs58867683	FN3KRP	0.280652	18.8119	5.34452e-45	5.15321e-41	5.34452e-45	0.001	0.000358658
chr1:160703965_rs983494	SLAMF7	0.256526	18.8051	5.58804e-45	5.03268e-41	5.58804e-45	0.001	0.000358658
chr19:45449284_rs2288911	APOC4-APOC2	1.31442	18.7956	5.94548e-45	2.28615e-40	5.94548e-45	0.001	0.000358658
chr6:110739752_rs9320330	DDO	-0.714309	-18.7132	1.01815e-44	4.08632e-41	1.01815e-44	0.001	0.000358658
chr11:86914000_rs12272942	FZD4	-0.622482	-18.6658	1.38758e-44	1.73647e-40	1.38758e-44	0.001	0.000358658
chr1:212542410_rs3099112	TMEM206	0.285593	18.5878	2.31145e-44	1.96277e-40	2.31145e-44	0.001	0.000358658
chr11:20379276_rs11025524	HTATIP2	-0.196162	-18.5863	2.33513e-44	2.8556e-40	2.33513e-44	0.001	0.000358658
chr7:150312151_rs34208822	GIMAP6	-0.689988	-18.5239	3.5141e-44	2.14253e-40	3.5141e-44	0.001	0.000358658
chr1:213030534_rs2279692	FLVCR1-AS1	-1.07509	-18.5013	4.07499e-44	3.37982e-40	4.07499e-44	0.001	0.000358658
chr12:6570539_rs2244083	TAPBPL	-0.380616	-18.4843	4.55476e-44	6.84968e-40	4.55476e-44	0.001	0.000358658
chr20:1599142_rs2209313	SIRPB1	-1.70069	-18.4585	5.39373e-44	2.03857e-40	5.39373e-44	0.001	0.000358658
chr11:44117424_rs12365753	EXT2	0.173618	18.4152	7.16686e-44	7.66081e-40	7.16686e-44	0.001	0.000358658
chr7:75161318_rs809439	PMS2P3	-0.699908	-18.3982	8.013e-44	4.84664e-40	8.013e-44	0.001	0.000358658
chr7:130321000_rs9656393	COPG2	-0.523695	-18.3847	8.75552e-44	5.28525e-40	8.75552e-44	0.001	0.000358658
chr9:94182363_rs2482704	NFIL3	0.264821	18.3802	9.02091e-44	2.07621e-39	9.02091e-44	0.001	0.000358658
chr1:228922233_rs12097866	RHOU	-0.483508	-18.3481	1.11351e-43	8.93089e-40	1.11351e-43	0.001	0.000358658
chr12:6606012_rs2270174	MRPL51	0.262226	18.3051	1.47703e-43	2.06339e-39	1.47703e-43	0.001	0.000358658
chr19:39927540_rs530411	RPS16	-0.127906	-18.2873	1.66066e-43	5.03195e-39	1.66066e-43	0.001	0.000358658
chr12:113382977_rs2384074	OAS3	-0.215863	-18.1534	4.01135e-43	5.12737e-39	4.01135e-43	0.001	0.000358658
chr6:139350182_rs12196247	ABRACL	0.503142	18.1507	4.08319e-43	1.52759e-39	4.08319e-43	0.001	0.000358658
chr5:149822918_rs4541646	RPS14	0.214145	18.1154	5.15164e-43	4.7396e-39	5.15164e-43	0.001	0.000358658
chr7:6098301_rs581706	EIF2AK1	-0.137519	-18.1145	5.18279e-43	2.92001e-39	5.18279e-43	0.001	0.000358658
chr17:10578034_rs201622	ADPRM	-0.328721	-18.0986	5.7555e-43	4.92594e-39	5.7555e-43	0.001	0.000358658
chr5:39256708_rs96436	FYB	-0.340323	-18.0753	6.71435e-43	6.13397e-39	6.71435e-43	0.001	0.000358658
chr2:217484229_rs17496232	IGFBP2	-1.08224	-18.0673	7.0796e-43	4.52926e-39	7.0796e-43	0.001	0.000358658
chr1:155658085_rs2666826	YY1AP1	0.132256	18.0661	7.13358e-43	5.23488e-39	7.13358e-43	0.001	0.000358658
chr22:51063477_rs6151429	ARSA	0.568059	18.0097	1.03535e-42	5.59506e-39	1.03535e-42	0.001	0.000358658
chr1:156305286_rs12117951	CCT3	-0.171613	-18.0065	1.05709e-42	7.6986e-39	1.05709e-42	0.001	0.000358658
chr11:60145822_rs2233239	MS4A7	-0.712923	-17.9924	1.16086e-42	8.93197e-39	1.16086e-42	0.001	0.000358658
chr15:26108603_rs8039874	ATP10A	-0.385184	-17.9393	1.64917e-42	1.17289e-38	1.64917e-42	0.001	0.000358658
chr12:50297934_rs297918	FAIM2	-2.10162	-17.9323	1.72707e-42	2.00466e-38	1.72707e-42	0.001	0.000358658
chr5:102556859_rs26254	PPIP5K2	0.18287	17.9171	1.90904e-42	1.60338e-38	1.90904e-42	0.001	0.000358658
chr12:13176310_rs6488576	HEBP1	-0.290685	-17.9133	1.9575e-42	2.26381e-38	1.9575e-42	0.001	0.000358658
chr17:46177362_rs11869625	SNX11	-0.279633	-17.8325	3.34361e-42	2.71031e-38	3.34361e-42	0.001	0.000358658
chr12:95396238_rs7965015	NDUFA12	-0.308375	-17.8194	3.64622e-42	4.11136e-38	3.64622e-42	0.001	0.000358658
chr6:29695305_rs2523405	HLA-F	0.236506	17.8093	3.89818e-42	1.43589e-38	3.89818e-42	0.001	0.000358658
chr17:61896487_rs1062791	FTSJ3	-0.168772	-17.7818	4.67907e-42	3.76514e-38	4.67907e-42	0.001	0.000358658
chr12:95226936_rs10745704	TMCC3	0.391588	17.7647	5.23802e-42	5.56816e-38	5.23802e-42	0.001	0.000358658
chr19:52004551_rs3810109	SIGLEC12	3.54199	17.7593	5.43065e-42	1.40304e-37	5.43065e-42	0.001	0.000358658
chr19:35465897_rs1862274	GRAMD1A	0.399231	17.7432	6.04091e-42	1.53644e-37	6.04091e-42	0.001	0.000358658
chr1:40559248_rs4660383	PPT1	-0.289568	-17.7301	6.59141e-42	4.0907e-38	6.59141e-42	0.001	0.000358658
chr7:43753897_rs10227203	BLVRA	0.200419	17.7102	7.52192e-42	3.58131e-38	7.52192e-42	0.001	0.000358658
chr21:19159694_rs243600	C21orf91	0.19059	17.7055	7.75803e-42	8.9749e-38	7.75803e-42	0.001	0.000358658
chr5:175810529_rs6862846	HIGD2A	0.295324	17.7051	7.78168e-42	6.10264e-38	7.78168e-42	0.001	0.000358658
chr9:104348150_rs11788456	GRIN3A	0.431114	17.6669	1.00231e-41	1.49015e-37	1.00231e-41	0.001	0.000358658
chr19:55832555_rs10411773	TMEM150B	-0.170535	-17.6615	1.03911e-41	2.56319e-37	1.03911e-41	0.001	0.000358658
chr17:72278870_rs6501705	MGC16275	0.489939	17.6358	1.23247e-41	9.09834e-38	1.23247e-41	0.001	0.000358658
chr4:113106986_rs60118647	C4orf32	0.191165	17.5843	1.73523e-41	1.12122e-37	1.73523e-41	0.001	0.000358658
chr4:103748224_rs223391	UBE2D3	-0.108442	-17.5266	2.54722e-41	1.55604e-37	2.54722e-41	0.001	0.000358658
chr12:29925273_rs4244848	TMTC1	-0.737596	-17.4936	3.17348e-41	2.43778e-37	3.17348e-41	0.001	0.000358658
chr19:36264030_rs62112162	IGFLR1	0.270947	17.4612	3.93772e-41	8.70688e-37	3.93772e-41	0.001	0.000358658
chr8:61457044_rs10957144	RAB2A	-0.140814	-17.4319	4.78633e-41	5.28574e-37	4.78633e-41	0.001	0.000358658
chr6:53668237_rs9395878	LRRC1	0.78627	17.4307	4.82384e-41	1.69831e-37	4.82384e-41	0.001	0.000358658
chr3:53778621_rs2304577	CACNA1D	-1.8719	-17.4261	4.97476e-41	2.09145e-37	4.97476e-41	0.001	0.000358658
chr7:75930759_rs2868371	HSPB1	0.341516	17.3565	7.91138e-41	2.49166e-37	7.91138e-41	0.001	0.000358658
chr16:67515312_rs13338993	ATP6V0D1	0.208193	17.3552	7.98112e-41	8.10583e-37	7.98112e-41	0.001	0.000358658
chr19:52255196_rs4802859	FPR1	-1.10246	-17.3531	8.09171e-41	1.63458e-36	8.09171e-41	0.001	0.000358658
chr10:114149479_rs10749118	ACSL5	0.22102	17.3418	8.72467e-41	2.97093e-37	8.72467e-41	0.001	0.000358658
chr1:159272060_rs2251746	FCER1A	-0.937464	-17.3349	9.13394e-41	5.32282e-37	9.13394e-41	0.001	0.000358658
chr9:32436014_rs7022554	ACO1	0.307299	17.3137	1.05215e-40	1.29816e-36	1.05215e-40	0.001	0.000358658
chr14:100544362_rs1190971	EVL	-0.485995	-17.2576	1.53001e-40	9.2237e-37	1.53001e-40	0.001	0.000358658
chr3:187091044_rs56230766	RTP4	0.163761	17.2536	1.57211e-40	6.5066e-37	1.57211e-40	0.001	0.000358658
chr11:57484130_rs71460549	ZDHHC5	-0.127842	-17.2225	1.93451e-40	1.36742e-36	1.93451e-40	0.001	0.000358658
chr8:101937374_rs3105460	YWHAZ	0.0960788	17.1805	2.56203e-40	2.35167e-36	2.56203e-40	0.001	0.000358658
chr8:96100803_rs11784746	PLEKHF2	0.278532	17.1122	4.04606e-40	3.58785e-36	4.04606e-40	0.001	0.000358658
chr12:85695613_rs1011728	ALX1	-0.82597	-17.1021	4.32879e-40	2.36042e-36	4.32879e-40	0.001	0.000358658
chr7:97920623_rs7015	BRI3	0.223141	17.0868	4.79367e-40	1.37717e-36	4.79367e-40	0.001	0.000358658
chr2:37608263_rs113961586	PRKD3	-0.283765	-17.0407	6.53072e-40	3.25215e-36	6.53072e-40	0.001	0.000358658
chr9:92219000_rs3138490	GADD45G	-0.391051	-17.0108	7.97523e-40	8.58301e-36	7.97523e-40	0.001	0.000358658
chr15:41576241_rs11267024	OIP5-AS1	-0.141543	-17.006	8.23932e-40	4.29169e-36	8.23932e-40	0.001	0.000358658
chr18:43675364_rs11664764	ATP5A1	0.112435	16.972	1.03441e-39	6.70513e-36	1.03441e-39	0.001	0.000358658
chr16:57146680_rs11862476	CPNE2	-0.292492	-16.9619	1.10693e-39	1.0309e-35	1.10693e-39	0.001	0.000358658
chr1:221966283_rs4846723	DUSP10	-0.494668	-16.9556	1.15514e-39	6.53236e-36	1.15514e-39	0.001	0.000358658
chr10:90658059_rs7912777	STAMBPL1	-0.646232	-16.9521	1.18212e-39	3.17136e-36	1.18212e-39	0.001	0.000358658
chr7:64126500_rs6460173	ZNF107	0.237749	16.9216	1.45076e-39	4.12118e-36	1.45076e-39	0.001	0.000358658
chr12:108956417_rs10778647	ISCU	0.33351	16.9211	1.45553e-39	7.58312e-36	1.45553e-39	0.001	0.000358658
chr11:108369173_rs74822968	KDELC2	0.304212	16.9196	1.47e-39	1.00378e-35	1.47e-39	0.001	0.000358658
chr14:51731306_rs8006432	TMX1	-0.0988286	-16.9042	1.63043e-39	8.65895e-36	1.63043e-39	0.001	0.000358658
chr22:40886557_rs139064	MKL1	-0.195104	-16.8833	1.8753e-39	9.34675e-36	1.8753e-39	0.001	0.000358658
chr9:131866388_rs2768630	CRAT	0.293717	16.8658	2.10973e-39	2.11292e-35	2.10973e-39	0.001	0.000358658
chr12:66533329_rs11176056	TMBIM4	0.14883	16.8642	2.13222e-39	1.10177e-35	2.13222e-39	0.001	0.000358658
chr12:102091379_rs71440841	CHPT1	-0.398929	-16.835	2.59335e-39	1.32917e-35	2.59335e-39	0.001	0.000358658
chr14:23429713_rs1951120	HAUS4	-0.233557	-16.8333	2.62354e-39	1.38235e-35	2.62354e-39	0.001	0.000358658
chr1:99127205_rs12723363	SNX7	2.47615	16.8319	2.64865e-39	1.46227e-35	2.64865e-39	0.001	0.000358658
chr5:42992920_rs11550285	AK056817	0.263583	16.8186	2.89636e-39	1.77021e-35	2.89636e-39	0.001	0.000358658
chr11:3812164_rs12279623	NUP98	-0.128257	-16.7924	3.4545e-39	2.21763e-35	3.4545e-39	0.001	0.000358658
chr6:71910211_rs4502887	OGFRL1	0.401014	16.7447	4.76021e-39	1.49132e-35	4.76021e-39	0.001	0.000358658
chr19:49391404_rs8112811	NUCB1	0.26425	16.6692	7.90827e-39	1.22075e-34	7.90827e-39	0.001	0.000358658
chr9:132568500_rs10116248	TOR1B	0.158158	16.6664	8.05877e-39	7.44772e-35	8.05877e-39	0.001	0.000358658
chr18:5245861_rs66482644	LINC00667	-0.504371	-16.6427	9.45254e-39	4.70307e-35	9.45254e-39	0.001	0.000358658
chr6:150060483_rs56397000	NUP43	0.186329	16.5933	1.31768e-38	3.86781e-35	1.31768e-38	0.001	0.000358658
chr6:149877245_rs9390690	GINM1	0.181855	16.5889	1.35791e-38	3.98265e-35	1.35791e-38	0.001	0.000358658
chr9:37422656_rs4878690	GRHPR	-0.269597	-16.5827	1.4161e-38	1.26008e-34	1.4161e-38	0.001	0.000358658
chr2:69607377_rs6713769	GFPT1	0.15536	16.5674	1.56919e-38	6.95015e-35	1.56919e-38	0.001	0.000358658
chr3:118959210_rs13065867	B4GALT4	-0.299656	-16.4971	2.52082e-38	8.1357e-35	2.52082e-38	0.001	0.000358658
chr7:1199365_rs7458082	ZFAND2A	0.391106	16.4823	2.78442e-38	7.48346e-35	2.78442e-38	0.001	0.000358658
chr16:1279555_rs148897236	TPSB2	-4.412	-16.4806	2.81699e-38	1.76902e-34	2.81699e-38	0.001	0.000358658
chr3:75808024_rs6777721	LOC401074	0.721591	16.4549	3.35019e-38	1.07257e-34	3.35019e-38	0.001	0.000358658
chr18:61034420_rs402348	KDSR	-0.288153	-16.4472	3.5284e-38	1.68277e-34	3.5284e-38	0.001	0.000358658
chr13:115029778_rs17291515	CDC16	-0.187203	-16.4185	4.28315e-38	2.95499e-33	4.28315e-38	0.001	0.000358658
chr6:31193916_rs116719511	HLA-C	0.868827	16.3948	5.025e-38	1.43504e-34	5.025e-38	0.001	0.000358658
chr8:90777510_rs431264	RIPK2	-0.131832	-16.3676	6.03821e-38	4.41824e-34	6.03821e-38	0.001	0.000358658
chr3:185798025_rs77805826	ETV5	-0.587451	-16.3472	6.93382e-38	2.18486e-34	6.93382e-38	0.001	0.000358658
chr7:128572766_rs4731532	IRF5	-0.138742	-16.3134	8.70908e-38	2.28024e-34	8.70908e-38	0.001	0.000358658
chr21:35029572_rs4817592	ITSN1	0.226692	16.2954	9.83778e-38	8.01833e-34	9.83778e-38	0.001	0.000358658
chr20:43528521_rs6017444	YWHAB	0.0793695	16.2502	1.33492e-37	3.96139e-34	1.33492e-37	0.001	0.000358658
chr15:34629024_rs73374490	NOP10	-0.327081	-16.2488	1.34805e-37	6.2631e-34	1.34805e-37	0.001	0.000358658
chr15:50836594_rs3131592	USP8	-0.151595	-16.2237	1.5972e-37	7.32857e-34	1.5972e-37	0.001	0.000358658
chr13:50019376_rs4942830	SETDB2	-0.264617	-16.1708	2.28455e-37	8.11947e-33	2.28455e-37	0.001	0.000358658
chr12:105310062_rs11112236	SLC41A2	0.294054	16.1567	2.51339e-37	1.13849e-33	2.51339e-37	0.001	0.000358658
chr5:65038454_rs2178731	NLN	-0.312426	-16.1398	2.81854e-37	1.56471e-33	2.81854e-37	0.001	0.000358658
chr16:30343843_rs12446863	TBC1D10B	0.16187	16.1333	2.94448e-37	1.7261e-33	2.94448e-37	0.001	0.000358658
chr11:33739598_rs831636	CD59	0.311533	16.1237	3.14299e-37	1.65441e-33	3.14299e-37	0.001	0.000358658
chr15:90466647_rs1702168	C15orf38-AP3S2	-0.396991	-16.0899	3.95051e-37	1.70279e-33	3.95051e-37	0.001	0.000358658
chr2:200626678_rs11687699	FTCDNL1	0.741043	16.0797	4.23492e-37	1.5345e-33	4.23492e-37	0.001	0.000358658
chr2:65212470_rs66719815	SLC1A4	0.366583	16.0651	4.6733e-37	1.68836e-33	4.6733e-37	0.001	0.000358658
chr12:109013956_rs73191242	SELPLG	-3.72349	-16.0591	4.867e-37	2.15513e-33	4.867e-37	0.001	0.000358658
chr1:111707912_rs612161	DRAM2	-0.234215	-16.0216	6.27735e-37	2.85802e-33	6.27735e-37	0.001	0.000358658
chr8:8144291_rs2945883	SGK223	0.363752	16.0189	6.39423e-37	3.98762e-33	6.39423e-37	0.001	0.000358658
chr10:7230524_rs2462712	SFMBT2	-0.430015	-15.9916	7.69001e-37	1.63922e-33	7.69001e-37	0.001	0.000358658
chr19:11691040_rs35879291	ACP5	0.297203	15.9843	8.08371e-37	8.85735e-33	8.08371e-37	0.001	0.000358658
chr2:9621900_rs59274893	ADAM17	0.166588	15.9831	8.14703e-37	2.92043e-33	8.14703e-37	0.001	0.000358658
chr19:41909346_rs6508977	BCKDHA	0.29249	15.9796	8.34526e-37	9.12357e-33	8.34526e-37	0.001	0.000358658
chr3:16295635_rs712874	DPH3	-0.177755	-15.9639	9.28018e-37	2.78156e-33	9.28018e-37	0.001	0.000358658
chr2:70134064_rs57445512	GMCL1	-0.162733	-15.9624	9.37468e-37	3.34101e-33	9.37468e-37	0.001	0.000358658
chr22:50964153_rs131805	TYMP	-0.219554	-15.9422	1.07524e-36	4.57149e-33	1.07524e-36	0.001	0.000358658
chr4:47930450_rs10008818	NFXL1	-0.568428	-15.9308	1.16202e-36	4.18845e-33	1.16202e-36	0.001	0.000358658
chr6:32806576_rs4148869	TAP2	-0.178695	-15.9234	1.22193e-36	3.00784e-33	1.22193e-36	0.001	0.000358658
chr6:3157442_rs909963	TUBB2A	-0.395862	-15.893	1.50124e-36	3.68022e-33	1.50124e-36	0.001	0.000358658
chr7:135357476_rs3110823	C7orf73	0.226849	15.8884	1.54904e-36	3.77928e-33	1.54904e-36	0.001	0.000358658
chr20:1462727_rs16994406	SIRPB2	1.07241	15.88	1.63962e-36	4.68266e-33	1.63962e-36	0.001	0.000358658
chr6:7542903_rs73373373	DSP	-1.66617	-15.8641	1.82744e-36	4.47071e-33	1.82744e-36	0.001	0.000358658
chr16:3508012_rs17525883	NAA60	0.284145	15.8398	2.1544e-36	1.20294e-32	2.1544e-36	0.001	0.000358658
chr7:139745791_rs6969159	PARP12	0.132013	15.8216	2.43772e-36	5.88611e-33	2.43772e-36	0.001	0.000358658
chr4:103675108_rs223492	MANBA	-0.203864	-15.8104	2.63159e-36	9.26833e-33	2.63159e-36	0.001	0.000358658
chr4:76650176_rs7657871	USO1	-0.149289	-15.8067	2.69799e-36	9.48862e-33	2.69799e-36	0.001	0.000358658
chr10:28812059_rs2993991	WAC-AS1	0.444306	15.7178	4.93494e-36	9.74117e-33	4.93494e-36	0.001	0.000358658
chr9:123666777_rs2241003	TRAF1	-0.172533	-15.6929	5.84523e-36	3.82274e-32	5.84523e-36	0.001	0.000358658
chr11:76474827_rs10160769	TSKU	-0.386477	-15.6582	7.40241e-36	3.6627e-32	7.40241e-36	0.001	0.000358658
chr11:73700410_rs675547	UCP2	-0.287617	-15.6517	7.73599e-36	3.81017e-32	7.73599e-36	0.001	0.000358658
chr19:40702553_rs7258548	MAP3K10	0.4646	15.6442	8.1416e-36	7.7004e-32	8.1416e-36	0.001	0.000358658
chr2:37458711_rs3213745	CEBPZ	0.122494	15.6273	9.13355e-36	2.98117e-32	9.13355e-36	0.001	0.000358658
chr3:122196892_rs55961674	KPNA1	-0.220547	-15.5714	1.33639e-35	3.75876e-32	1.33639e-35	0.001	0.000358658
chr16:74700240_rs4888272	RFWD3	-0.310466	-15.5705	1.34481e-35	7.13752e-32	1.34481e-35	0.001	0.000358658
chr5:68390284_rs337259	SLC30A5	-0.161966	-15.5641	1.40467e-35	6.40503e-32	1.40467e-35	0.001	0.000358658
chr14:103878774_rs12882130	MARK3	0.14649	15.5522	1.52289e-35	6.57462e-32	1.52289e-35	0.001	0.000358658
chr15:83613169_rs2219889	FAM103A1	0.660712	15.5521	1.52454e-35	5.50598e-32	1.52454e-35	0.001	0.000358658
chr3:49975654_rs7609971	RBM6	0.105218	15.5347	1.71622e-35	4.61968e-32	1.71622e-35	0.001	0.000358658
chr10:29845316_rs2505922	SVIL	-0.285671	-15.5247	1.83653e-35	3.53604e-32	1.83653e-35	0.001	0.000358658
chr19:53134276_rs1089760	ZNF83	0.399731	15.4977	2.20728e-35	1.99907e-31	2.20728e-35	0.001	0.000358658
chr11:7543519_rs11041426	PPFIBP2	0.159365	15.4306	3.48768e-35	1.65688e-31	3.48768e-35	0.001	0.000358658
chr6:32614318_rs9273265	HLA-DQA1	0.727246	15.4161	3.84838e-35	8.26406e-32	3.84838e-35	0.001	0.000358658
chr3:49821878_rs13084243	IP6K1	0.156672	15.4031	4.20707e-35	1.11461e-31	4.20707e-35	0.001	0.000358658
chr2:239144694_rs72976084	HES6	0.526862	15.3956	4.42592e-35	1.38806e-31	4.42592e-35	0.001	0.000358658
chr16:31171174_rs17708638	PRSS36	0.468031	15.3746	5.10921e-35	2.62149e-31	5.10921e-35	0.001	0.000358658
chr15:90638192_rs6496622	IDH2	0.316052	15.3741	5.12659e-35	1.792e-31	5.12659e-35	0.001	0.000358658
chr2:240882147_rs11684044	NDUFA10	0.227397	15.3653	5.44388e-35	1.64433e-31	5.44388e-35	0.001	0.000358658
chr7:76131650_rs6958774	DTX2	0.235998	15.3591	5.67865e-35	1.25648e-31	5.67865e-35	0.001	0.000358658
chr16:82203786_rs2303260	MPHOSPH6	0.369557	15.353	5.91749e-35	3.02991e-31	5.91749e-35	0.001	0.000358658
chr6:36357691_rs2187810	ETV7	-0.171974	-15.3471	6.16246e-35	1.29539e-31	6.16246e-35	0.001	0.000358658
chr12:109014756_rs8179151	CORO1C	0.262943	15.3386	6.52854e-35	2.48841e-31	6.52854e-35	0.001	0.000358658
chr18:21140432_rs1805081	C18orf8	-0.14029	-15.3073	8.08621e-35	3.33768e-31	8.08621e-35	0.001	0.000358658
chr9:102879336_rs2485746	STX17	-0.104134	-15.3016	8.40383e-35	5.09254e-31	8.40383e-35	0.001	0.000358658
chr18:9710830_rs11872189	RAB31	0.175637	15.2966	8.69441e-35	3.5727e-31	8.69441e-35	0.001	0.000358658
chr12:8210637_rs2072449	FOXJ2	-0.201043	-15.2901	9.09141e-35	3.40087e-31	9.09141e-35	0.001	0.000358658
chr7:1532401_rs56315048	INTS1	0.170996	15.2761	1.00018e-34	2.1309e-31	1.00018e-34	0.001	0.000358658
chr9:74916092_rs2310125	AK095210	-0.343112	-15.2637	1.08814e-34	6.49522e-31	1.08814e-34	0.001	0.000358658
chr15:75070196_rs12905199	CSK	0.152716	15.2582	1.13e-34	3.89832e-31	1.13e-34	0.001	0.000358658
chr12:50602295_rs34825838	LIMA1	-0.378277	-15.2455	1.23289e-34	4.53141e-31	1.23289e-34	0.001	0.000358658
chr1:16150384_rs7537101	SPEN	0.143762	15.2387	1.2909e-34	5.1807e-31	1.2909e-34	0.001	0.000358658
chr22:44422638_rs11914048	PARVB	-0.295865	-15.2157	1.51094e-34	5.30737e-31	1.51094e-34	0.001	0.000358658
chr20:1099294_rs2072963	PSMF1	-0.166524	-15.2032	1.64542e-34	4.23727e-31	1.64542e-34	0.001	0.000358658
chr9:73294487_rs1934472	TRPM3	0.770046	15.1881	1.82434e-34	1.08088e-30	1.82434e-34	0.001	0.000358658
chr16:29834954_rs62056371	MVP	0.117981	15.1852	1.86009e-34	9.27404e-31	1.86009e-34	0.001	0.000358658
chr6:52529904_rs2670125	LOC730101	-0.313255	-15.1615	2.18649e-34	4.33672e-31	2.18649e-34	0.001	0.000358658
chr6:32783896_rs2621326	HLA-DOB	0.357157	15.1233	2.83852e-34	5.59283e-31	2.83852e-34	0.001	0.000358658
chr17:62979614_rs62073272	AMZ2P1	-0.554693	-15.1172	2.95948e-34	9.20756e-31	2.95948e-34	0.001	0.000358658
chr1:11858957_rs45553335	MTHFR	-0.829532	-15.0309	5.33825e-34	2.10138e-30	5.33825e-34	0.001	0.000358658
chr6:26537609_rs4713007	HMGN4	-0.239737	-15.0162	5.9015e-34	1.13777e-30	5.9015e-34	0.001	0.000358658
chr9:34235329_rs10972012	NUDT2	-0.609896	-15.0001	6.59062e-34	3.56104e-30	6.59062e-34	0.001	0.000358658
chr22:50666223_rs56133520	SELO	-0.552264	-14.9859	7.26318e-34	2.31935e-30	7.26318e-34	0.001	0.000358658
chr5:73125274_rs62357755	ENC1	-1.05797	-14.9792	7.60086e-34	2.57012e-30	7.60086e-34	0.001	0.000358658
chr5:6736064_rs274690	PAPD7	-0.126128	-14.9746	7.84789e-34	2.64678e-30	7.84789e-34	0.001	0.000358658
chr13:53046836_rs11618716	CKAP2	0.204289	14.934	1.0354e-33	1.22663e-29	1.0354e-33	0.001	0.000358658
chr20:25427836_rs6050623	ABHD12	0.232092	14.9334	1.03984e-33	2.54823e-30	1.03984e-33	0.001	0.000358658
chr4:156874833_rs2292538	CTSO	0.189365	14.9305	1.06049e-33	3.35572e-30	1.06049e-33	0.001	0.000358658
chr12:21587314_rs1860949	PYROXD1	0.192506	14.9276	1.08237e-33	3.63537e-30	1.08237e-33	0.001	0.000358658
chr19:36240614_rs7260184	KMT2B	-0.363968	-14.9234	1.11353e-33	8.54072e-30	1.11353e-33	0.001	0.000358658
chr17:25964686_rs11080243	LGALS9	0.103102	14.9177	1.15789e-33	3.25629e-30	1.15789e-33	0.001	0.000358658
chr1:236818221_rs12131560	ACTN2	0.61045	14.917	1.16314e-33	4.42283e-30	1.16314e-33	0.001	0.000358658
chr10:126084637_rs4587686	OAT	-0.243141	-14.9102	1.21872e-33	1.94797e-30	1.21872e-33	0.001	0.000358658
chr17:39946683_rs2883071	JUP	0.402946	14.9093	1.22621e-33	3.42801e-30	1.22621e-33	0.001	0.000358658
chr1:160257980_rs7523769	COPA	0.103446	14.8932	1.36903e-33	5.16856e-30	1.36903e-33	0.001	0.000358658
chr17:80416405_rs28365946	C17orf62	0.127281	14.8927	1.37371e-33	3.79229e-30	1.37371e-33	0.001	0.000358658
chr1:207498644_rs6681853	CD55	-0.237667	-14.8891	1.408e-33	5.31193e-30	1.408e-33	0.001	0.000358658
chr7:45038609_rs6463259	SNHG15	0.343615	14.8758	1.54284e-33	2.99931e-30	1.54284e-33	0.001	0.000358658
chr16:4853816_rs2290562	ROGDI	-0.401673	-14.8729	1.57333e-33	7.29876e-30	1.57333e-33	0.001	0.000358658
chr1:12053100_rs2103876	MFN2	0.103253	14.8689	1.61734e-33	6.04844e-30	1.61734e-33	0.001	0.000358658
chr6:32571508_rs111841857	HLA-DRB5	0.652651	14.8608	1.7086e-33	3.16796e-30	1.7086e-33	0.001	0.000358658
chr12:8210637_rs2072449	NECAP1	-0.168683	-14.8429	1.93204e-33	6.38726e-30	1.93204e-33	0.001	0.000358658
chr19:54701720_rs166252	RPS9	0.140186	14.831	2.09637e-33	1.56391e-29	2.09637e-33	0.001	0.000358658
chr2:28976403_rs4665434	PPP1CB	-0.101256	-14.7961	2.6618e-33	7.37507e-30	2.6618e-33	0.001	0.000358658
chr13:37653007_rs1764494	SUPT20H	-0.227138	-14.7905	2.76556e-33	3.03138e-29	2.76556e-33	0.001	0.000358658
chr16:68791306_rs9646284	CDH1	-0.829961	-14.7892	2.78932e-33	1.24484e-29	2.78932e-33	0.001	0.000358658
chr6:149866452_rs9404042	PPIL4	0.161049	14.7826	2.91991e-33	5.26675e-30	2.91991e-33	0.001	0.000358658
chr5:150111844_rs6892273	DCTN4	-0.144733	-14.7676	3.23463e-33	9.77011e-30	3.23463e-33	0.001	0.000358658
chr10:105205302_rs7831	CALHM2	-0.351445	-14.7068	4.90638e-33	7.51564e-30	4.90638e-33	0.001	0.000358658
chr2:75215493_rs4592875	POLE4	-0.259305	-14.7031	5.03156e-33	1.37548e-29	5.03156e-33	0.001	0.000358658
chr8:8833120_rs62492946	ERI1	0.501411	14.6902	5.49655e-33	2.39313e-29	5.49655e-33	0.001	0.000358658
chr14:74030518_rs2336136	HEATR4	-0.522836	-14.6797	5.9052e-33	1.88821e-29	5.9052e-33	0.001	0.000358658
chr3:120486950_rs9814744	GTF2E1	-0.183885	-14.6772	6.00994e-33	1.33444e-29	6.00994e-33	0.001	0.000358658
chr11:6342018_rs1812173	PRKCDBP	1.60081	14.6665	6.46649e-33	2.773e-29	6.46649e-33	0.001	0.000358658
chr18:34361762_rs948636	TPGS2	0.26341	14.6587	6.82241e-33	2.64968e-29	6.82241e-33	0.001	0.000358658
chr11:119379608_rs113484698	PVRL1	-1.14334	-14.646	7.44054e-33	3.17799e-29	7.44054e-33	0.001	0.000358658
chr1:38465315_rs4634868	FHL3	-0.195095	-14.6301	8.2991e-33	2.85697e-29	8.2991e-33	0.001	0.000358658
chr2:113816090_rs2441374	IL36RN	1.77445	14.6252	8.58327e-33	2.30034e-29	8.58327e-33	0.001	0.000358658
chr5:114504589_rs973	TRIM36	-0.183267	-14.6112	9.44767e-33	2.76387e-29	9.44767e-33	0.001	0.000358658
chr19:984578_rs2301811	WDR18	0.374117	14.6083	9.6367e-33	6.71934e-29	9.6367e-33	0.001	0.000358658
chr20:48884124_rs6125961	AK307192	0.724454	14.562	1.32292e-32	3.12595e-29	1.32292e-32	0.001	0.000358658
chr6:74334569_rs80347160	SLC17A5	-0.307745	-14.5354	1.5876e-32	2.54245e-29	1.5876e-32	0.001	0.000358658
chr10:35325393_rs75115307	CREM	0.3075	14.5303	1.64465e-32	2.48634e-29	1.64465e-32	0.001	0.000358658
chr10:100176869_rs701801	HPS1	-0.177624	-14.528	1.67064e-32	2.52407e-29	1.67064e-32	0.001	0.000358658
chr5:131592870_rs3900945	PDLIM4	0.475509	14.5165	1.80748e-32	5.1943e-29	1.80748e-32	0.001	0.000358658
chr1:161185058_rs2070901	FCER1G	-0.187075	-14.5066	1.93465e-32	6.44442e-29	1.93465e-32	0.001	0.000358658
chr4:170678993_rs11540095	C4orf27	0.500395	14.4964	2.07499e-32	6.2525e-29	2.07499e-32	0.001	0.000358658
chr7:150476550_rs4725943	TMEM176A	0.777698	14.4774	2.36344e-32	4.10651e-29	2.36344e-32	0.001	0.000358658
chr17:66039618_rs35594666	LINC00674	0.282396	14.4715	2.46222e-32	6.23515e-29	2.46222e-32	0.001	0.000358658
chr2:191264073_rs62180981	MFSD6	-0.307129	-14.4385	3.0864e-32	7.92025e-29	3.0864e-32	0.001	0.000358658
chr11:57420885_rs1631684	YPEL4	-0.505719	-14.4069	3.8347e-32	1.47552e-28	3.8347e-32	0.001	0.000358658
chr5:94800655_rs112716946	TTC37	-0.20682	-14.3741	4.79996e-32	1.32669e-28	4.79996e-32	0.001	0.000358658
chr5:35851261_rs12516866	IL7R	-0.330559	-14.3718	4.87735e-32	1.34665e-28	4.87735e-32	0.001	0.000358658
chr6:44065879_rs4714741	MRPL14	0.155709	14.3589	5.33028e-32	7.57104e-29	5.33028e-32	0.001	0.000358658
chr2:86414822_rs2081322	IMMT	-0.125446	-14.3508	5.63268e-32	1.394e-28	5.63268e-32	0.001	0.000358658
chr2:128048674_rs55998967	MAP3K2	0.112299	14.3401	6.06283e-32	1.49044e-28	6.06283e-32	0.001	0.000358658
chr1:165601365_rs4147596	MGST3	0.166508	14.3323	6.39768e-32	2.01801e-28	6.39768e-32	0.001	0.000358658
chr2:88450605_rs4410294	THNSL2	-2.0694	-14.308	7.55888e-32	1.82894e-28	7.55888e-32	0.001	0.000358658
chr14:100842059_rs2234518	WARS	-0.16385	-14.3038	7.77543e-32	2.31934e-28	7.77543e-32	0.001	0.000358658
chr2:163128824_rs3747517	IFIH1	0.116364	14.302	7.8773e-32	1.89974e-28	7.8773e-32	0.001	0.000358658
chr18:55238820_rs2272783	FECH	0.362759	14.2942	8.31036e-32	2.83309e-28	8.31036e-32	0.001	0.000358658
chr8:133846645_rs2223130	PHF20L1	-0.179174	-14.2684	9.91826e-32	3.88473e-28	9.91826e-32	0.001	0.000358658
chr16:89574576_rs4785684	SPG7	0.156439	14.2645	1.01855e-31	3.69669e-28	1.01855e-31	0.001	0.000358658
chr4:122620565_rs7655436	ANXA5	0.154981	14.2638	1.02369e-31	2.91685e-28	1.02369e-31	0.001	0.000358658
chr6:34720317_rs6906606	UHRF1BP1	-0.186761	-14.2373	1.22807e-31	1.62355e-28	1.22807e-31	0.001	0.000358658
chr19:10222862_rs112647895	EIF3G	-0.165005	-14.2315	1.2774e-31	8.27234e-28	1.2774e-31	0.001	0.000358658
chr8:82575783_rs2400589	IMPA1	0.125033	14.2219	1.36491e-31	5.13134e-28	1.36491e-31	0.001	0.000358658
chr3:52953844_rs9985365	TMEM110-MUSTN1	0.178111	14.2201	1.38202e-31	2.80186e-28	1.38202e-31	0.001	0.000358658
chr17:43460891_rs114934705	ARHGAP27	0.157523	14.2169	1.41255e-31	3.3926e-28	1.41255e-31	0.001	0.000358658
chr19:49949079_rs12985192	ALDH16A1	0.203451	14.2008	1.5773e-31	1.0201e-27	1.5773e-31	0.001	0.000358658
chr2:152084705_rs289903	RBM43	-0.175157	-14.1998	1.58875e-31	3.6891e-28	1.58875e-31	0.001	0.000358658
chr19:17518544_rs4808632	AK311380	0.240554	14.1882	1.71962e-31	1.11068e-27	1.71962e-31	0.001	0.000358658
chr21:37584598_rs2239569	DOPEY2	0.310708	14.1741	1.89506e-31	1.52723e-27	1.89506e-31	0.001	0.000358658
chr2:103062926_rs6734762	IL18RAP	0.596988	14.1705	1.94181e-31	4.45848e-28	1.94181e-31	0.001	0.000358658
chr4:119947188_rs7671665	SYNPO2	0.389179	14.1573	2.12684e-31	5.89633e-28	2.12684e-31	0.001	0.000358658
chr7:2795882_rs798498	GNA12	-0.228598	-14.1461	2.29668e-31	3.76273e-28	2.29668e-31	0.001	0.000358658
chr1:22352108_rs11801382	LINC00339	-0.489548	-14.1177	2.7906e-31	8.32613e-28	2.7906e-31	0.001	0.000358658
chr5:96252432_rs2927608	ERAP2	-0.56749	-14.0689	3.90206e-31	1.0089e-27	3.90206e-31	0.001	0.000358658
chr2:238666716_rs62194225	LRRFIP1	0.0926745	14.0683	3.91747e-31	8.62882e-28	3.91747e-31	0.001	0.000358658
chr17:54934541_rs8067906	C17orf67	0.666319	14.063	4.06222e-31	9.38829e-28	4.06222e-31	0.001	0.000358658
chr14:81660997_rs2288499	GTF2A1	0.195815	14.0567	4.24449e-31	1.15615e-27	4.24449e-31	0.001	0.000358658
chr15:22922576_rs7171787	CYFIP1	-0.171555	-14.0532	4.3478e-31	1.09382e-27	4.3478e-31	0.001	0.000358658
chr10:115439394_rs7918733	CASP7	-0.17912	-14.0487	4.48231e-31	5.98277e-28	4.48231e-31	0.001	0.000358658
chr14:35582138_rs12879871	PPP2R3C	0.128172	14.0461	4.56436e-31	1.24159e-27	4.56436e-31	0.001	0.000358658
chr14:75484772_rs1955474	EIF2B2	-0.160912	-14.0456	4.57975e-31	1.2441e-27	4.57975e-31	0.001	0.000358658
chr15:50992311_rs12592778	SPPL2A	-0.127923	-14.0408	4.73425e-31	1.18782e-27	4.73425e-31	0.001	0.000358658
chr6:2876535_rs318429	MGC39372	0.912352	14.0195	5.47812e-31	6.35969e-28	5.47812e-31	0.001	0.000358658
chr11:124021407_rs11219470	VWA5A	-0.331696	-14.0103	5.8375e-31	2.03628e-27	5.8375e-31	0.001	0.000358658
chr1:146700009_rs6658030	CHD1L	-0.232164	-13.9962	6.43161e-31	1.80899e-27	6.43161e-31	0.001	0.000358658
chr22:51020668_rs86337	CHKB-CPT1B	-0.168011	-13.9911	6.65779e-31	1.95274e-27	6.65779e-31	0.001	0.000358658
chr5:150798334_rs11953411	SLC36A1	-0.37098	-13.9884	6.78523e-31	1.71186e-27	6.78523e-31	0.001	0.000358658
chr17:54944086_rs9892659	TRIM25	0.12912	13.9509	8.77441e-31	1.95151e-27	8.77441e-31	0.001	0.000358658
chr11:77209966_rs35449255	PAK1	-0.24757	-13.9474	8.99294e-31	3.10333e-27	8.99294e-31	0.001	0.000358658
chr16:89791210_rs62068387	ZNF276	-0.215614	-13.9373	9.63472e-31	2.95381e-27	9.63472e-31	0.001	0.000358658
chr12:133337352_rs7971299	ANKLE2	0.190161	13.9308	1.00761e-30	2.41733e-27	1.00761e-30	0.001	0.000358658
chr2:85554080_rs4247303	TGOLN2	0.0911981	13.9302	1.01195e-30	2.11158e-27	1.01195e-30	0.001	0.000358658
chr3:9960070_rs708567	IL17RC	-0.190874	-13.9147	1.12561e-30	2.19698e-27	1.12561e-30	0.001	0.000358658
chr1:10467074_rs6541094	PGD	-0.116689	-13.913	1.13901e-30	3.07278e-27	1.13901e-30	0.001	0.000358658
chr20:33880146_rs111916968	EIF6	-0.275306	-13.8912	1.32264e-30	2.31517e-27	1.32264e-30	0.001	0.000358658
chr5:53597285_rs10940375	ARL15	-0.273266	-13.8843	1.38719e-30	3.42022e-27	1.38719e-30	0.001	0.000358658
chr3:49518299_rs71615484	GPX1	0.14961	13.8809	1.41976e-30	2.76437e-27	1.41976e-30	0.001	0.000358658
chr9:139796419_rs10870140	FBXW5	-0.135455	-13.8792	1.43603e-30	5.25583e-27	1.43603e-30	0.001	0.000358658
chr15:50431087_rs12915287	ATP8B4	0.339024	13.8643	1.59184e-30	3.86794e-27	1.59184e-30	0.001	0.000358658
chr17:79646704_rs7502109	ARL16	0.460679	13.8531	1.71821e-30	3.65434e-27	1.71821e-30	0.001	0.000358658
chr9:116711241_rs7853673	ZNF618	-0.193406	-13.8396	1.88551e-30	6.86937e-27	1.88551e-30	0.001	0.000358658
chr14:91246293_rs17127003	TTC7B	0.243475	13.8382	1.90362e-30	4.86805e-27	1.90362e-30	0.001	0.000358658
chr6:31469365_rs9267393	MICB	-0.188815	-13.8381	1.90495e-30	2.07079e-27	1.90495e-30	0.001	0.000358658
chr10:118752250_rs1122688	KIAA1598	0.180407	13.8263	2.06664e-30	2.70492e-27	2.06664e-30	0.001	0.000358658
chr3:195108167_rs58067895	ACAP2	0.114176	13.8044	2.40248e-30	4.62425e-27	2.40248e-30	0.001	0.000358658
chr1:156147558_rs3738581	SEMA4A	-0.179556	-13.7905	2.64343e-30	6.82502e-27	2.64343e-30	0.001	0.000358658
chr5:134223593_rs3733897	TXNDC15	0.255787	13.7723	2.99524e-30	7.20752e-27	2.99524e-30	0.001	0.000358658
chr2:113993385_rs7576384	PAX8	1.19977	13.7641	3.16813e-30	6.122e-27	3.16813e-30	0.001	0.000358658
chr22:36926306_rs9680636	EIF3D	-0.144775	-13.7451	3.61014e-30	1.04228e-26	3.61014e-30	0.001	0.000358658
chr1:179285591_rs58948941	SOAT1	-0.250687	-13.7231	4.19903e-30	1.06462e-26	4.19903e-30	0.001	0.000358658
chr19:48611620_rs434371	PLA2G4C	-0.31799	-13.7122	4.52648e-30	2.7163e-26	4.52648e-30	0.001	0.000358658
chr11:62380027_rs113222038	EML3	-0.0963276	-13.6879	5.34949e-30	1.77554e-26	5.34949e-30	0.001	0.000358658
chr2:202004190_rs10184098	PPIL3	0.441891	13.6865	5.40149e-30	1.02549e-26	5.40149e-30	0.001	0.000358658
chr4:122722368_rs3828485	CCNA2	-0.255321	-13.6834	5.51683e-30	1.34871e-26	5.51683e-30	0.001	0.000358658
chr4:178361987_rs13133517	AGA	0.271689	13.6731	5.92173e-30	1.44198e-26	5.92173e-30	0.001	0.000358658
chr2:113993385_rs7576384	LOC654433	1.47994	13.6697	6.06116e-30	1.14659e-26	6.06116e-30	0.001	0.000358658
chr1:236555424_rs4659666	EDARADD	-0.469688	-13.6657	6.23158e-30	1.55998e-26	6.23158e-30	0.001	0.000358658
chr1:54861827_rs213479	SSBP3	-0.349303	-13.6626	6.36399e-30	1.59015e-26	6.36399e-30	0.001	0.000358658
chr14:104095701_rs1054080	XRCC3	-0.161689	-13.6616	6.40686e-30	1.52753e-26	6.40686e-30	0.001	0.000358658
chr1:59037652_rs232848	TACSTD2	-0.735301	-13.6503	6.92589e-30	1.72491e-26	6.92589e-30	0.001	0.000358658
chr9:79320640_rs512110	PRUNE2	0.567528	13.6436	7.254e-30	2.57234e-26	7.254e-30	0.001	0.000358658
chr4:185652147_rs3806796	MLF1IP	-0.313214	-13.6335	7.77345e-30	1.88171e-26	7.77345e-30	0.001	0.000358658
chr1:2490942_rs2281852	TNFRSF14	-0.0928079	-13.6303	7.94961e-30	1.96705e-26	7.94961e-30	0.001	0.000358658
chr20:44645593_rs3918271	SLC12A5	-0.689041	-13.6098	9.14687e-30	1.55105e-26	9.14687e-30	0.001	0.000358658
chr15:83219340_rs803686	RPS17L	0.133176	13.6097	9.15425e-30	2.00086e-26	9.15425e-30	0.001	0.000358658
chr4:110547880_rs10017027	CCDC109B	-0.190112	-13.5743	1.16757e-29	2.80974e-26	1.16757e-29	0.001	0.000358658
chr2:69059163_rs72830966	ARHGAP25	0.142914	13.5736	1.17317e-29	2.1423e-26	1.17317e-29	0.001	0.000358658
chr7:116528240_rs4808	CAPZA2	0.078418	13.5416	1.46214e-29	2.16995e-26	1.46214e-29	0.001	0.000358658
chr21:44001795_rs400625	SLC37A1	0.175869	13.5385	1.49373e-29	8.37014e-26	1.49373e-29	0.001	0.000358658
chr10:51808564_rs11003511	FAM21A	0.980894	13.5336	1.54427e-29	1.95891e-26	1.54427e-29	0.001	0.000358658
chr17:29062951_rs3928551	CRLF3	0.190428	13.5224	1.66856e-29	3.18424e-26	1.66856e-29	0.001	0.000358658
chr17:61852186_rs3760252	DDX42	0.113678	13.4968	1.98906e-29	3.74616e-26	1.98906e-29	0.001	0.000358658
chr11:34897474_rs2163377	APIP	0.240871	13.4928	2.0453e-29	6.49368e-26	2.0453e-29	0.001	0.000358658
chr4:17617490_rs10939740	MED28	-0.12807	-13.4738	2.33075e-29	5.50138e-26	2.33075e-29	0.001	0.000358658
chr15:79230389_rs75564875	CTSH	-0.650829	-13.4694	2.4011e-29	5.06262e-26	2.4011e-29	0.001	0.000358658
chr2:108905048_rs2305485	SULT1C2	-0.924304	-13.466	2.45781e-29	4.32114e-26	2.45781e-29	0.001	0.000358658
chr1:205898828_rs11240595	SLC26A9	1.06217	13.441	2.91874e-29	6.72449e-26	2.91874e-29	0.001	0.000358658
chr22:24334674_rs142283780	GSTT2	-1.61726	-13.4202	3.36731e-29	9.39094e-26	3.36731e-29	0.001	0.000358658
chr19:10717587_rs12977297	SLC44A2	-0.565588	-13.4191	3.39253e-29	1.87113e-25	3.39253e-29	0.001	0.000358658
chr3:119390590_rs11923223	POPDC2	0.195533	13.4191	3.39433e-29	6.17616e-26	3.39433e-29	0.001	0.000358658
chr15:76844571_rs11854850	SCAPER	-0.184415	-13.4025	3.80487e-29	7.91413e-26	3.80487e-29	0.001	0.000358658
chr16:84209816_rs2288022	ADAD2	-0.385784	-13.3956	3.98835e-29	9.5937e-26	3.98835e-29	0.001	0.000358658
chr11:63570194_rs1307231	ATL3	-0.141845	-13.3847	4.29832e-29	1.32163e-25	4.29832e-29	0.001	0.000358658
chr12:28371672_rs10771411	CCDC91	-0.154735	-13.3676	4.83491e-29	1.06971e-25	4.83491e-29	0.001	0.000358658
chr17:66443609_rs78095701	WIPI1	0.33527	13.3628	4.99831e-29	9.19087e-26	4.99831e-29	0.001	0.000358658
chr5:179126090_rs11749335	CANX	0.0795854	13.3439	5.69014e-29	1.18901e-25	5.69014e-29	0.001	0.000358658
chr9:15300968_rs4008004	TTC39B	0.577024	13.3404	5.82926e-29	1.92721e-25	5.82926e-29	0.001	0.000358658
chr13:114463834_rs7328385	TMEM255B	0.443574	13.3341	6.0868e-29	3.43215e-25	6.0868e-29	0.001	0.000358658
chr1:178997159_rs4652346	FAM20B	-0.162891	-13.3244	6.50428e-29	1.44321e-25	6.50428e-29	0.001	0.000358658
chr1:37979933_rs6426021	MEAF6	-0.134157	-13.3211	6.65665e-29	1.47518e-25	6.65665e-29	0.001	0.000358658
chr7:150457308_rs4554383	TMEM176B	0.855475	13.3115	7.11118e-29	1.01382e-25	7.11118e-29	0.001	0.000358658
chr16:74562172_rs11648786	GLG1	-0.15723	-13.2861	8.46398e-29	1.99131e-25	8.46398e-29	0.001	0.000358658
chr3:10165565_rs190910699	BRK1	0.117231	13.2772	9.00128e-29	1.59249e-25	9.00128e-29	0.001	0.000358658
chr12:121202664_rs9431	SPPL3	-0.124717	-13.2646	9.81108e-29	2.14511e-25	9.81108e-29	0.001	0.000358658
chr11:87908346_rs302647	RAB38	-0.561913	-13.2531	1.06198e-28	3.14797e-25	1.06198e-28	0.001	0.000358658
chr4:88912817_rs4593094	PKD2	-0.188472	-13.2408	1.15531e-28	2.58328e-25	1.15531e-28	0.001	0.000358658
chr17:1620734_rs721576	MIR22HG	-0.218103	-13.2225	1.3103e-28	2.29069e-25	1.3103e-28	0.001	0.000358658
chr16:89800550_rs7189734	VPS9D1	-0.234935	-13.2124	1.40459e-28	3.23064e-25	1.40459e-28	0.001	0.000358658
chr5:49581349_rs79332394	EMB	-0.265774	-13.1884	1.65647e-28	3.30996e-25	1.65647e-28	0.001	0.000358658
chr21:34706172_rs2856977	IFNAR1	-0.174452	-13.1577	2.04516e-28	9.84487e-25	2.04516e-28	0.001	0.000358658
chr13:50078802_rs9596123	RCBTB1	-0.317883	-13.1488	2.17492e-28	1.02857e-24	2.17492e-28	0.001	0.000358658
chr9:111876523_rs72607172	TMEM245	-0.178641	-13.1407	2.29918e-28	7.14721e-25	2.29918e-28	0.001	0.000358658
chr5:229935_rs113533002	SDHA	0.318886	13.1387	2.33159e-28	4.59896e-25	2.33159e-28	0.001	0.000358658
chr16:4740208_rs3747592	MGRN1	-0.110993	-13.1354	2.38377e-28	5.40723e-25	2.38377e-28	0.001	0.000358658
chr19:12876964_rs897804	PRDX2	-0.315243	-13.1181	2.68477e-28	1.30356e-24	2.68477e-28	0.001	0.000358658
chr10:77140864_rs7078507	C10orf11	-0.269384	-13.1139	2.76359e-28	3.36836e-25	2.76359e-28	0.001	0.000358658
chr1:1665747_rs2281177	MMP23A	-2.03293	-13.0765	3.57432e-28	7.23473e-25	3.57432e-28	0.001	0.000358658
chr15:78279229_rs28560025	TBC1D2B	0.187796	13.0749	3.61281e-28	7.2066e-25	3.61281e-28	0.001	0.000358658
chr11:57289328_rs2649665	TIMM10	0.422114	13.0745	3.62377e-28	1.03506e-24	3.62377e-28	0.001	0.000358658
chr6:167400345_rs9356551	RNASET2	-0.241248	-13.0663	3.83224e-28	3.42516e-25	3.83224e-28	0.001	0.000358658
chr18:2968752_rs625527	LPIN2	0.174487	13.0535	4.18507e-28	1.21905e-24	4.18507e-28	0.001	0.000358658
chr11:5666664_rs16933883	TRIM6-TRIM34	0.326543	13.0523	4.2214e-28	1.1962e-24	4.2214e-28	0.001	0.000358658
chr11:85542096_rs11234430	CCDC83	0.554274	13.0468	4.38146e-28	1.24046e-24	4.38146e-28	0.001	0.000358658
chr9:139269483_rs3829111	CARD9	-0.215082	-13.0322	4.84548e-28	1.43301e-24	4.84548e-28	0.001	0.000358658
chr17:4830104_rs4486968	SLC25A11	0.106424	13.0292	4.94655e-28	7.69489e-25	4.94655e-28	0.001	0.000358658
chr19:55134267_rs8108712	LILRB1	0.340691	13.0285	4.96995e-28	2.38387e-24	4.96995e-28	0.001	0.000358658
chr2:209037176_rs7604079	IDH1	-0.191864	-12.9954	6.23933e-28	9.81732e-25	6.23933e-28	0.001	0.000358658
chr1:183604905_rs2767305	ARPC5	-0.0665599	-12.9936	6.31538e-28	1.25316e-24	6.31538e-28	0.001	0.000358658
chr1:93666349_rs7513705	TMED5	-0.0854479	-12.9761	7.12097e-28	1.40779e-24	7.12097e-28	0.001	0.000358658
chr1:89441642_rs12120164	CCBL2	0.11246	12.9717	7.33891e-28	1.44873e-24	7.33891e-28	0.001	0.000358658
chr5:52105305_rs34980571	ITGA1	0.387277	12.9554	8.20894e-28	1.52993e-24	8.20894e-28	0.001	0.000358658
chr12:2990002_rs12822487	TULP3	0.171563	12.9513	8.4433e-28	1.64044e-24	8.4433e-28	0.001	0.000358658
chr17:47045009_rs62078385	UBE2Z	0.102892	12.9483	8.61948e-28	1.2864e-24	8.61948e-28	0.001	0.000358658
chr16:28981511_rs7192056	SPNS1	0.184862	12.9442	8.8651e-28	1.90085e-24	8.8651e-28	0.001	0.000358658
chr6:26455114_rs4712998	BTN2A1	0.160028	12.9364	9.35178e-28	8.01739e-25	9.35178e-28	0.001	0.000358658
chr9:14694059_rs10961673	ZDHHC21	-0.234627	-12.9323	9.62355e-28	2.69102e-24	9.62355e-28	0.001	0.000358658
chr12:25226017_rs4963600	LRMP	0.371052	12.8823	1.35666e-27	2.54348e-24	1.35666e-27	0.001	0.000358658
chr3:196476880_rs7638157	PAK2	-0.0867981	-12.8802	1.37622e-27	2.20302e-24	1.37622e-27	0.001	0.000358658
chr12:69845222_rs61927223	CCT2	-0.221305	-12.8714	1.46129e-27	2.73155e-24	1.46129e-27	0.001	0.000358658
chr3:142720730_rs3902877	U2SURP	0.081192	12.8591	1.59009e-27	2.51761e-24	1.59009e-27	0.001	0.000358658
chr10:94643646_rs1960367	EXOC6	-0.205318	-12.8582	1.60013e-27	1.90814e-24	1.60013e-27	0.001	0.000358658
chr1:153932212_rs6724	SLC39A1	-0.101015	-12.848	1.71671e-27	3.29288e-24	1.71671e-27	0.001	0.000358658
chr16:4907125_rs112861583	UBN1	-0.297884	-12.8422	1.78547e-27	3.68128e-24	1.78547e-27	0.001	0.000358658
chr19:46350418_rs113666002	SYMPK	0.171923	12.8136	2.17283e-27	9.83938e-24	2.17283e-27	0.001	0.000358658
chr7:38398998_rs62445013	Y00482	2.53389	12.8123	2.19264e-27	2.76226e-24	2.19264e-27	0.001	0.000358658
chr1:172502340_rs2285143	SUCO	-0.12974	-12.808	2.2585e-27	4.29361e-24	2.2585e-27	0.001	0.000358658
chr17:13933337_rs62054068	CDRT15	-1.99711	-12.784	2.66285e-27	3.66942e-24	2.66285e-27	0.001	0.000358658
chr12:1153313_rs4765969	ERC1	-0.175678	-12.7701	2.92945e-27	5.32766e-24	2.92945e-27	0.001	0.000358658
chr19:40858050_rs12460490	PLD3	-0.589667	-12.7625	3.08696e-27	1.37505e-23	3.08696e-27	0.001	0.000358658
chr18:12883308_rs55982017	PTPN2	0.181154	12.7566	3.21297e-27	8.93475e-24	3.21297e-27	0.001	0.000358658
chr16:46738418_rs698416	VPS35	0.145727	12.753	3.2933e-27	6.66211e-24	3.2933e-27	0.001	0.000358658
chr10:127522572_rs3740206	UROS	0.198561	12.7455	3.46759e-27	4.09884e-24	3.46759e-27	0.001	0.000358658
chr7:90955960_rs1429535	FZD1	-0.320752	-12.7409	3.57902e-27	4.46078e-24	3.57902e-27	0.001	0.000358658
chr20:3746070_rs6139202	C20orf27	-0.598195	-12.7391	3.62355e-27	5.66409e-24	3.62355e-27	0.001	0.000358658
chr14:88473386_rs75703795	GALC	0.353491	12.7389	3.62841e-27	7.01738e-24	3.62841e-27	0.001	0.000358658
chr1:31391010_rs4949326	SDC3	-0.423137	-12.7363	3.69323e-27	6.9276e-24	3.69323e-27	0.001	0.000358658
chr14:103155594_rs8009257	RCOR1	0.11188	12.7195	4.14501e-27	7.9934e-24	4.14501e-27	0.001	0.000358658
chr6:117819198_rs929058	DCBLD1	0.229507	12.7159	4.24878e-27	3.43122e-24	4.24878e-27	0.001	0.000358658
chr10:3217369_rs9423504	PITRM1	-0.228253	-12.7113	4.38649e-27	5.16741e-24	4.38649e-27	0.001	0.000358658
chr16:66598583_rs8060922	TK2	-0.27115	-12.7093	4.44558e-27	8.94177e-24	4.44558e-27	0.001	0.000358658
chr11:321320_rs56228238	IFITM3	0.199225	12.7045	4.59556e-27	1.15111e-23	4.59556e-27	0.001	0.000358658
chr6:116783619_rs117361304	FAM26F	0.872412	12.7019	4.67773e-27	3.76491e-24	4.67773e-27	0.001	0.000358658
chr11:77851935_rs499517	ALG8	-0.194902	-12.6956	4.88339e-27	1.21846e-23	4.88339e-27	0.001	0.000358658
chr7:140068644_rs12703797	SLC37A3	-0.374658	-12.688	5.1446e-27	6.35995e-24	5.1446e-27	0.001	0.000358658
chr1:222910211_rs73126814	BROX	-0.227767	-12.68	5.43622e-27	1.00525e-23	5.43622e-27	0.001	0.000358658
chr21:40463283_rs9977672	ETS2	0.174142	12.672	5.74269e-27	2.32709e-23	5.74269e-27	0.001	0.000358658
chr20:37430173_rs6071541	PPP1R16B	-0.250763	-12.6682	5.89331e-27	9.16487e-24	5.89331e-27	0.001	0.000358658
chr22:50645219_rs11913090	TRABD	-0.285615	-12.6584	6.30517e-27	1.59555e-23	6.30517e-27	0.001	0.000358658
chr16:30404484_rs4340343	2018-09-01	1899-12-29 14:29:50	-12.6582	6.31052e-27	1.24693e-23	6.31052e-27	0.001	0.000358658
chr3:98431986_rs10935480	ST3GAL6-AS1	0.462854	12.656	6.40841e-27	9.44016e-24	6.40841e-27	0.001	0.000358658
chr2:25880344_rs12478242	DTNB	0.293071	12.6429	7.0107e-27	9.96708e-24	7.0107e-27	0.001	0.000358658
chr1:225999979_rs6426089	EPHX1	0.174665	12.5979	9.5439e-27	1.73426e-23	9.5439e-27	0.001	0.000358658
chr8:27950670_rs2305451	ELP3	-0.150531	-12.5921	9.93528e-27	2.39116e-23	9.93528e-27	0.001	0.000358658
chr4:130038714_rs474667	C4orf33	0.238361	12.5917	9.95741e-27	1.91065e-23	9.95741e-27	0.001	0.000358658
chr19:44079687_rs3213245	XRCC1	-0.201032	-12.5346	1.47323e-26	5.89381e-23	1.47323e-26	0.001	0.000358658
chr4:39355501_rs13142220	RFC1	-1.51965	-12.5305	1.51556e-26	2.84815e-23	1.51556e-26	0.001	0.000358658
chr2:37605748_rs2041841	QPCT	-0.190333	-12.503	1.82954e-26	2.49055e-23	1.82954e-26	0.001	0.000358658
chr17:27897585_rs8081275	TP53I13	-0.143335	-12.4904	1.99399e-26	2.46066e-23	1.99399e-26	0.001	0.000358658
chr10:26698474_rs5010812	APBB1IP	-0.290873	-12.4884	2.02159e-26	2.30002e-23	2.02159e-26	0.001	0.000358658
chr7:150300393_rs1879871	GIMAP4	-0.440941	-12.4727	2.25114e-26	2.69639e-23	2.25114e-26	0.001	0.000358658
chr16:11549350_rs12448492	AK126539	-0.401898	-12.4683	2.31987e-26	4.36717e-23	2.31987e-26	0.001	0.000358658
chr5:77339846_rs11746090	AP3B1	0.126478	12.4616	2.42994e-26	3.89576e-23	2.42994e-26	0.001	0.000358658
chr10:90749963_rs1800682	ACTA2	0.44504	12.4569	2.50828e-26	2.84043e-23	2.50828e-26	0.001	0.000358658
chr17:18699226_rs59021386	TVP23B	0.115302	12.4548	2.54546e-26	3.12835e-23	2.54546e-26	0.001	0.000358658
chr12:97160669_rs971521	C12orf63	-0.4074	-12.4536	2.56688e-26	4.23193e-23	2.56688e-26	0.001	0.000358658
chr4:76964956_rs35170645	CXCL11	0.194372	12.4368	2.87839e-26	5.21807e-23	2.87839e-26	0.001	0.000358658
chr16:15166232_rs11075255	RRN3	0.122477	12.4327	2.96152e-26	5.52451e-23	2.96152e-26	0.001	0.000358658
chr13:25876011_rs12871898	NUPL1	-0.0976309	-12.4217	3.19308e-26	1.17767e-22	3.19308e-26	0.001	0.000358658
chr14:54959387_rs10129925	GMFB	-0.133045	-12.4182	3.26991e-26	5.98391e-23	3.26991e-26	0.001	0.000358658
chr7:22740513_rs35345753	IL6	0.44732	12.4034	3.61928e-26	4.27954e-23	3.61928e-26	0.001	0.000358658
chr6:151779064_rs6916340	C6orf211	0.198697	12.3808	4.22397e-26	2.98537e-23	4.22397e-26	0.001	0.000358658
chr19:17518544_rs4808632	BST2	-0.11734	-12.3771	4.33406e-26	1.63778e-22	4.33406e-26	0.001	0.000358658
chr11:93252328_rs7945684	SMCO4	0.265802	12.3708	4.52585e-26	1.00179e-22	4.52585e-26	0.001	0.000358658
chr20:62149840_rs2145166	PPDPF	0.494244	12.3576	4.95329e-26	7.40733e-23	4.95329e-26	0.001	0.000358658
chr5:50114421_rs1125916	PARP8	-0.180678	-12.3374	5.6851e-26	8.56597e-23	5.6851e-26	0.001	0.000358658
chr9:130219409_rs4837154	ZNF79	0.43382	12.3269	6.11129e-26	1.37224e-22	6.11129e-26	0.001	0.000358658
chr12:19361585_rs1492127	PLEKHA5	0.393944	12.3169	6.54219e-26	1.06086e-22	6.54219e-26	0.001	0.000358658
chr9:110098732_rs817838	RAD23B	-0.0918737	-12.3127	6.7362e-26	1.5055e-22	6.7362e-26	0.001	0.000358658
chr16:53358439_rs3743771	CHD9	0.127194	12.3058	7.06052e-26	1.26269e-22	7.06052e-26	0.001	0.000358658
chr11:14524333_rs2597184	COPB1	-0.0619421	-12.3033	7.18105e-26	1.55366e-22	7.18105e-26	0.001	0.000358658
chr17:3565103_rs161398	TAX1BP3	0.216294	12.2964	7.5308e-26	9.08647e-23	7.5308e-26	0.001	0.000358658
chr2:202007013_rs56230518	CFLAR	0.0890636	12.2954	7.58119e-26	9.70707e-23	7.58119e-26	0.001	0.000358658
chr2:241566429_rs2975781	GPR35	-0.347353	-12.2861	8.08099e-26	1.03183e-22	8.08099e-26	0.001	0.000358658
chr17:41842937_rs1230395	DUSP3	-0.194961	-12.2847	8.15809e-26	9.83616e-23	8.15809e-26	0.001	0.000358658
chr8:41305885_rs6474341	GOLGA7	0.246509	12.2837	8.21054e-26	1.82869e-22	8.21054e-26	0.001	0.000358658
chr3:148869220_rs11711932	HPS3	-0.189299	-12.2829	8.25607e-26	1.1107e-22	8.25607e-26	0.001	0.000358658
chr11:34256447_rs10836162	ABTB2	-0.144217	-12.2776	8.56412e-26	1.80972e-22	8.56412e-26	0.001	0.000358658
chr1:236408862_rs185060087	ERO1LB	-0.590427	-12.2695	9.04777e-26	1.51637e-22	9.04777e-26	0.001	0.000358658
chr5:64902209_rs62369059	CENPK	-0.450827	-12.2682	9.12881e-26	1.32709e-22	9.12881e-26	0.001	0.000358658
chr3:185677564_rs6793264	LOC344887	0.267196	12.262	9.52687e-26	1.27522e-22	9.52687e-26	0.001	0.000358658
chr2:216207924_rs13002052	ATIC	-0.181227	-12.2603	9.63586e-26	1.21563e-22	9.63586e-26	0.001	0.000358658
chr22:36597744_rs9610445	APOL4	0.683762	12.2535	1.00964e-25	2.37186e-22	1.00964e-25	0.001	0.000358658
chr12:69383865_rs2220951	CPM	0.182857	12.2507	1.02917e-25	1.64687e-22	1.02917e-25	0.001	0.000358658
chr7:56139990_rs7811270	CCT6A	0.0749409	12.2501	1.03353e-25	1.18388e-22	1.03353e-25	0.001	0.000358658
chr4:102094453_rs4699110	PPP3CA	0.324546	12.2466	1.05848e-25	1.79597e-22	1.05848e-25	0.001	0.000358658
chr16:423813_rs28461437	TMEM8A	0.146731	12.2443	1.07502e-25	1.88031e-22	1.07502e-25	0.001	0.000358658
chr1:111700685_rs2580040	CEPT1	-0.131302	-12.2417	1.09477e-25	1.82564e-22	1.09477e-25	0.001	0.000358658
chr5:176974497_rs28470545	DOK3	-0.566972	-12.2405	1.1039e-25	1.56545e-22	1.1039e-25	0.001	0.000358658
chr11:118892757_rs117289748	CCDC84	-0.269194	-12.24	1.10742e-25	2.30381e-22	1.10742e-25	0.001	0.000358658
chr17:34414914_rs1719126	CCL3	0.157976	12.2215	1.25641e-25	1.50171e-22	1.25641e-25	0.001	0.000358658
chr11:130029661_rs28365809	ST14	0.985503	12.2207	1.264e-25	2.5943e-22	1.264e-25	0.001	0.000358658
chr1:200649759_rs10919999	DDX59	0.15473	12.2187	1.28101e-25	2.1243e-22	1.28101e-25	0.001	0.000358658
chr3:48487911_rs9881491	SHISA5	0.182946	12.2112	1.34804e-25	1.78573e-22	1.34804e-25	0.001	0.000358658
chr7:36756443_rs10238016	AOAH	0.407933	12.1878	1.58229e-25	1.78824e-22	1.58229e-25	0.001	0.000358658
chr7:128142023_rs12539729	METTL2B	0.159057	12.1857	1.60507e-25	1.81264e-22	1.60507e-25	0.001	0.000358658
chr12:100970662_rs35714	GAS2L3	-0.253641	-12.184	1.62425e-25	2.57047e-22	1.62425e-25	0.001	0.000358658
chr16:66646591_rs3743719	CMTM3	0.182437	12.1819	1.6481e-25	2.84239e-22	1.6481e-25	0.001	0.000358658
chr11:617378_rs61877856	IRF7	-0.106992	-12.1789	1.68189e-25	3.37868e-22	1.68189e-25	0.001	0.000358658
chr1:28717682_rs149674434	PHACTR4	0.685355	12.178	1.69219e-25	2.75742e-22	1.69219e-25	0.001	0.000358658
chr14:77571077_rs7155657	KIAA1737	0.2616	12.1634	1.8697e-25	3.29537e-22	1.8697e-25	0.001	0.000358658
chr3:39448804_rs1472508	RPSA	0.10072	12.1279	2.38396e-25	3.0776e-22	2.38396e-25	0.001	0.000358658
chr4:152067460_rs7699495	RPS3A	0.160905	12.1184	2.54277e-25	4.10485e-22	2.54277e-25	0.001	0.000358658
chr6:711150_rs2244443	AX747750	-0.447751	-12.1118	2.65951e-25	1.71404e-22	2.65951e-25	0.001	0.000358658
chr3:189012108_rs9867318	TPRG1	0.639277	12.0952	2.97972e-25	3.822e-22	2.97972e-25	0.001	0.000358658
chr1:121147880_rs7536214	SRGAP2D	0.181086	12.0914	3.05877e-25	4.83974e-22	3.05877e-25	0.001	0.000358658
chr5:150529118_rs79737957	ANXA6	-0.176118	-12.0761	3.39618e-25	4.51146e-22	3.39618e-25	0.001	0.000358658
chr8:90991268_rs7832009	NBN	0.113077	12.0509	4.03238e-25	8.73339e-22	4.03238e-25	0.001	0.000358658
chr14:23553836_rs11621660	C14orf119	-0.145868	-12.0411	4.31094e-25	7.27245e-22	4.31094e-25	0.001	0.000358658
chr10:35280461_rs4934526	CUL2	0.14906	12.0041	5.54899e-25	5.79961e-22	5.54899e-25	0.001	0.000358658
chr20:57571763_rs9760	NELFCD	0.163149	12.0004	5.69297e-25	8.0489e-22	5.69297e-25	0.001	0.000358658
chr7:6884883_rs11978506	CCZ1B	0.577288	11.9962	5.86012e-25	6.34927e-22	5.86012e-25	0.001	0.000358658
chr22:50310847_rs9616206	CRELD2	-0.27859	-11.9892	6.14603e-25	1.39069e-21	6.14603e-25	0.001	0.000358658
chr8:144643169_rs1545536	GSDMD	-0.130171	-11.9861	6.27726e-25	1.34308e-21	6.27726e-25	0.001	0.000358658
chr17:43804317_rs117962468	KANSL1-AS1	1.57702	11.9822	6.44655e-25	7.32903e-22	6.44655e-25	0.001	0.000358658
chr18:56987447_rs1980176	LMAN1	-0.175071	-11.9811	6.4938e-25	1.63761e-21	6.4938e-25	0.001	0.000358658
chr11:125461497_rs545673	STT3A	-0.128911	-11.97	7.00312e-25	1.28303e-21	7.00312e-25	0.001	0.000358658
chr14:94567032_rs3818119	IFI27L1	-0.468807	-11.9682	7.09115e-25	1.17746e-21	7.09115e-25	0.001	0.000358658
chr1:10386506_rs12135774	KIF1B	-0.198444	-11.9653	7.234e-25	1.06993e-21	7.234e-25	0.001	0.000358658
chr11:62316195_rs11231138	TUT1	0.1053	11.9642	7.28796e-25	1.33255e-21	7.28796e-25	0.001	0.000358658
chr2:223167710_rs6436310	PAX3	-0.605102	-11.951	7.97752e-25	9.16665e-22	7.97752e-25	0.001	0.000358658
chr21:46328099_rs760462	ITGB2	-0.233685	-11.934	8.95522e-25	2.76859e-21	8.95522e-25	0.001	0.000358658
chr1:245133662_rs61844237	EFCAB2	0.703186	11.9295	9.23641e-25	1.33871e-21	9.23641e-25	0.001	0.000358658
chr9:5381870_rs2381277	PLGRKT	0.171108	11.9275	9.36334e-25	1.91231e-21	9.36334e-25	0.001	0.000358658
chr12:105365409_rs12367133	C12orf45	0.286387	11.9104	1.05169e-24	1.56034e-21	1.05169e-24	0.001	0.000358658
chr15:74790542_rs58615418	UBL7	-0.252396	-11.9067	1.07903e-24	1.60778e-21	1.07903e-24	0.001	0.000358658
chr6:32628342_rs9273500	HLA-DQB1	0.977958	11.8916	1.19543e-24	7.32384e-22	1.19543e-24	0.001	0.000358658
chr19:54786546_rs436911	MIR4752	-1.35164	-11.8853	1.24802e-24	4.27808e-21	1.24802e-24	0.001	0.000358658
chr6:52227016_rs75731219	PAQR8	-0.213189	-11.8843	1.25654e-24	7.69034e-22	1.25654e-24	0.001	0.000358658
chr17:73296583_rs4789167	SLC25A19	-0.194514	-11.8807	1.28811e-24	1.431e-21	1.28811e-24	0.001	0.000358658
chr7:150312151_rs34208822	GIMAP5	-0.45297	-11.8743	1.34538e-24	1.39794e-21	1.34538e-24	0.001	0.000358658
chr1:207967719_rs7144	CD46	0.0859063	11.8558	1.52584e-24	2.08872e-21	1.52584e-24	0.001	0.000358658
chr4:187125394_rs4997691	CYP4V2	-0.666023	-11.8248	1.88594e-24	2.78685e-21	1.88594e-24	0.001	0.000358658
chr16:4537670_rs4786503	CDIP1	-0.232311	-11.8076	2.11942e-24	3.28147e-21	2.11942e-24	0.001	0.000358658
chr16:461762_rs1204504	DECR2	-0.457615	-11.7832	2.50364e-24	3.84978e-21	2.50364e-24	0.001	0.000358658
chr11:68440107_rs2012605	GAL	-1.84356	-11.7751	2.64423e-24	4.61941e-21	2.64423e-24	0.001	0.000358658
chr8:2077072_rs2280902	MYOM2	0.888017	11.7673	2.78943e-24	5.61151e-21	2.78943e-24	0.001	0.000358658
chr11:124759644_rs4635093	ROBO3	0.762458	11.7592	2.94815e-24	5.12808e-21	2.94815e-24	0.001	0.000358658
chr6:32569305_rs76264710	HLA-DQB2	0.892001	11.745	3.24673e-24	1.92815e-21	3.24673e-24	0.001	0.000358658
chr5:145545881_rs13154547	LARS	-0.116528	-11.7384	3.39598e-24	3.95435e-21	3.39598e-24	0.001	0.000358658
chr9:135231298_rs549152	SETX	0.0944184	11.7049	4.26619e-24	7.99032e-21	4.26619e-24	0.001	0.000358658
chr17:4673023_rs6502821	CXCL16	0.298319	11.6944	4.58004e-24	4.94037e-21	4.58004e-24	0.001	0.000358658
chr7:106938903_rs75254991	HBP1	0.145645	11.6811	5.0143e-24	4.99196e-21	5.0143e-24	0.001	0.000358658
chr11:62316195_rs11231138	EEF1G	0.0856594	11.677	5.15729e-24	8.53232e-21	5.15729e-24	0.001	0.000358658
chr4:103298209_rs140184482	SLC39A8	-0.387898	-11.6746	5.24267e-24	7.41334e-21	5.24267e-24	0.001	0.000358658
chr20:37050753_rs3752277	SNHG17	0.333114	11.662	5.70823e-24	7.50249e-21	5.70823e-24	0.001	0.000358658
chr1:247389120_rs61840475	MIR3916	-0.301606	-11.65	6.19481e-24	7.59224e-21	6.19481e-24	0.001	0.000358658
chr1:223967237_rs1222123	TP53BP2	0.134123	11.6498	6.20552e-24	7.60362e-21	6.20552e-24	0.001	0.000358658
chr1:85067560_rs12119873	CTBS	0.174882	11.6341	6.90054e-24	8.41476e-21	6.90054e-24	0.001	0.000358658
chr1:212729727_rs11119970	ATF3	-0.206456	-11.6178	7.71242e-24	9.36211e-21	7.71242e-24	0.001	0.000358658
chr11:126168362_rs2962117	FOXRED1	-0.255292	-11.6158	7.81556e-24	1.27596e-20	7.81556e-24	0.001	0.000358658
chr12:121661700_rs10849858	P2RX4	0.14337	11.6153	7.841e-24	1.04985e-20	7.841e-24	0.001	0.000358658
chr11:118940479_rs484263	VPS11	-0.179214	-11.6089	8.1927e-24	1.33145e-20	8.1927e-24	0.001	0.000358658
chr8:42397004_rs2923444	SMIM19	0.187038	11.6079	8.24736e-24	1.59119e-20	8.24736e-24	0.001	0.000358658
chr11:65064690_rs487989	POLA2	0.160272	11.6042	8.45916e-24	1.36715e-20	8.45916e-24	0.001	0.000358658
chr8:22926313_rs1129424	TNFRSF10B	-0.107402	-11.5948	9.01635e-24	1.73482e-20	9.01635e-24	0.001	0.000358658
chr15:72994370_rs12441084	ADPGK	0.115573	11.5897	9.33333e-24	1.23983e-20	9.33333e-24	0.001	0.000358658
chr2:224830345_rs13015773	WDFY1	0.0989915	11.5877	9.46272e-24	9.79782e-21	9.46272e-24	0.001	0.000358658
chr7:39669564_rs11769987	RALA	0.13754	11.579	1.00371e-23	9.71576e-21	1.00371e-23	0.001	0.000358658
chr2:71365116_rs357759	MPHOSPH10	-0.130264	-11.5717	1.05513e-23	1.08883e-20	1.05513e-23	0.001	0.000358658
chr6:15541094_rs9476839	DTNBP1	-0.317816	-11.5676	1.08483e-23	6.23285e-21	1.08483e-23	0.001	0.000358658
chr9:97193069_rs113563784	HIATL1	0.110951	11.5609	1.1354e-23	1.99101e-20	1.1354e-23	0.001	0.000358658
chr6:32149537_rs148720361	RNF5	0.251598	11.5459	1.25634e-23	7.18376e-21	1.25634e-23	0.001	0.000358658
chr10:71970721_rs10999188	PPA1	0.213313	11.5414	1.29568e-23	1.21086e-20	1.29568e-23	0.001	0.000358658
chr1:161344545_rs56269923	SDHC	0.152739	11.5391	1.31584e-23	1.57092e-20	1.31584e-23	0.001	0.000358658
chr11:32777427_rs183677383	EIF3M	-0.100631	-11.5312	1.38865e-23	2.19144e-20	1.38865e-23	0.001	0.000358658
chr22:38136676_rs4821703	TRIOBP	0.139086	11.5224	1.47416e-23	3.01223e-20	1.47416e-23	0.001	0.000358658
chr3:122169384_rs112768052	PARP9	-0.0878908	-11.5211	1.48734e-23	1.7119e-20	1.48734e-23	0.001	0.000358658
chr12:102455729_rs3751129	CCDC53	0.165666	11.5204	1.49431e-23	1.91392e-20	1.49431e-23	0.001	0.000358658
chr17:44831932_rs9902077	NSF	-0.229763	-11.5035	1.67638e-23	1.77186e-20	1.67638e-23	0.001	0.000358658
chr20:632504_rs13043781	SRXN1	0.268206	11.4828	1.9281e-23	2.27444e-20	1.9281e-23	0.001	0.000358658
chr8:144658370_rs896955	NAPRT1	0.46246	11.4687	2.12208e-23	4.01026e-20	2.12208e-23	0.001	0.000358658
chr21:30431144_rs35416285	CCT8	0.0598499	11.4577	2.28599e-23	5.98402e-20	2.28599e-23	0.001	0.000358658
chr10:92682060_rs10748555	ANKRD1	0.537957	11.4555	2.32066e-23	2.08526e-20	2.32066e-23	0.001	0.000358658
chr1:100224399_rs2814042	FRRS1	-0.267189	-11.4296	2.76601e-23	3.09565e-20	2.76601e-23	0.001	0.000358658
chr6:2952892_rs2580109	SERPINB6	-0.183088	-11.4292	2.77334e-23	1.55246e-20	2.77334e-23	0.001	0.000358658
chr19:55914444_rs2891577	UBE2S	0.180238	11.4103	3.15227e-23	9.79348e-20	3.15227e-23	0.001	0.000358658
chr15:59466489_rs58124311	LDHAL6B	-0.892036	-11.4025	3.32469e-23	4.12601e-20	3.32469e-23	0.001	0.000358658
chr8:33381926_rs34826952	MAK16	0.140914	11.3993	3.3975e-23	6.35259e-20	3.3975e-23	0.001	0.000358658
chr6:46114914_rs7766857	ENPP4	0.564962	11.3884	3.65831e-23	2.02588e-20	3.65831e-23	0.001	0.000358658
chr9:75167355_rs4472583	ZFAND5	-0.13441	-11.3836	3.77976e-23	5.98365e-20	3.77976e-23	0.001	0.000358658
chr8:17432466_rs2720579	PDGFRL	-0.288912	-11.3818	3.82496e-23	7.13298e-20	3.82496e-23	0.001	0.000358658
chr22:25468830_rs17668150	KIAA1671	0.23654	11.3785	3.91017e-23	7.81666e-20	3.91017e-23	0.001	0.000358658
chr20:33896262_rs3795159	UQCC	0.155003	11.3647	4.29457e-23	4.85492e-20	4.29457e-23	0.001	0.000358658
chr11:94829514_rs2509814	ENDOD1	-0.439061	-11.3427	4.98395e-23	7.07697e-20	4.98395e-23	0.001	0.000358658
chr5:65038454_rs2178731	SGTB	-0.187548	-11.3405	5.05922e-23	4.64396e-20	5.05922e-23	0.001	0.000358658
chr2:71618599_rs12478953	DYSF	0.258868	11.3389	5.11555e-23	5.00822e-20	5.11555e-23	0.001	0.000358658
chr7:44140670_rs2537193	AEBP1	-0.833997	-11.3266	5.55961e-23	4.80661e-20	5.55961e-23	0.001	0.000358658
chr15:40722510_rs79626713	IVD	0.314449	11.3265	5.56291e-23	6.69693e-20	5.56291e-23	0.001	0.000358658
chr22:42910376_rs9611811	RRP7B	-0.737175	-11.3245	5.63905e-23	1.11221e-19	5.63905e-23	0.001	0.000358658
chr17:73324195_rs9910601	GRB2	-0.0773774	-11.3215	5.7538e-23	5.91884e-20	5.7538e-23	0.001	0.000358658
chr17:7017958_rs2289645	ASGR2	-0.51341	-11.3072	6.33799e-23	6.49153e-20	6.33799e-23	0.001	0.000358658
chr4:153701130_rs4619875	ARFIP1	-0.138277	-11.295	6.8819e-23	8.46261e-20	6.8819e-23	0.001	0.000358658
chr1:220276304_rs17563518	IARS2	-0.13748	-11.2923	7.00884e-23	7.45723e-20	7.00884e-23	0.001	0.000358658
chr2:172380390_rs6706526	CYBRD1	-0.357579	-11.2903	7.10493e-23	6.88997e-20	7.10493e-23	0.001	0.000358658
chr22:42994430_rs9611825	POLDIP3	-0.0956737	-11.2893	7.15634e-23	1.39838e-19	7.15634e-23	0.001	0.000358658
chr17:11995116_rs12325878	MAP2K4	-0.113824	-11.284	7.41806e-23	7.56262e-20	7.41806e-23	0.001	0.000358658
chr11:71165547_rs1792315	NADSYN1	-0.115181	-11.2775	7.74885e-23	1.06777e-19	7.74885e-23	0.001	0.000358658
chr17:10075853_rs12936206	GAS7	-0.252013	-11.2723	8.02457e-23	8.15582e-20	8.02457e-23	0.001	0.000358658
chr1:116161623_rs12034733	VANGL1	0.326319	11.2541	9.07967e-23	9.57672e-20	9.07967e-23	0.001	0.000358658
chr5:39564204_rs1501714	DAB2	0.18113	11.2512	9.25589e-23	7.99837e-20	9.25589e-23	0.001	0.000358658
chr9:130574980_rs7868117	FPGS	0.145399	11.2475	9.4916e-23	1.4253e-19	9.4916e-23	0.001	0.000358658
chr10:127518538_rs11244667	DHX32	0.189557	11.2345	1.03617e-22	8.81787e-20	1.03617e-22	0.001	0.000358658
chr12:40540411_rs183792546	LRRK2	-1.17648	-11.2186	1.15427e-22	1.32038e-19	1.15427e-22	0.001	0.000358658
chr6:26381316_rs3757149	BTN2A2	0.250393	11.217	1.16612e-22	6.15432e-20	1.16612e-22	0.001	0.000358658
chr6:133100901_rs9493440	SLC18B1	-0.498475	-11.2169	1.16692e-22	6.15766e-20	1.16692e-22	0.001	0.000358658
chr5:36267348_rs11750947	RANBP3L	-0.363172	-11.2166	1.16998e-22	9.99419e-20	1.16998e-22	0.001	0.000358658
chr14:68285228_rs4284565	ZFYVE26	0.0775672	11.2097	1.22513e-22	1.61806e-19	1.22513e-22	0.001	0.000358658
chr6:32511488_rs74750549	HLA-DQA2	-5.77216	-11.2082	1.23834e-22	6.52109e-20	1.23834e-22	0.001	0.000358658
chr1:100719371_rs10158183	RTCA	0.120382	11.1967	1.33821e-22	1.39036e-19	1.33821e-22	0.001	0.000358658
chr9:21031152_rs13284810	PTPLAD2	-0.206024	-11.194	1.3625e-22	1.96582e-19	1.3625e-22	0.001	0.000358658
chr7:8019163_rs67343471	GLCCI1	0.370027	11.1883	1.41638e-22	1.17963e-19	1.41638e-22	0.001	0.000358658
chr1:9713500_rs4240896	PIK3CD	-0.22404	-11.1797	1.50097e-22	1.55644e-19	1.50097e-22	0.001	0.000358658
chr22:39433623_rs4821860	APOBEC3C	-0.162879	-11.1772	1.52583e-22	2.9046e-19	1.52583e-22	0.001	0.000358658
chr19:13020541_rs7409457	FARSA	0.095305	11.1728	1.57233e-22	4.53745e-19	1.57233e-22	0.001	0.000358658
chr22:23922552_rs9624216	IGLL1	1.03137	11.1718	1.58341e-22	3.01033e-19	1.58341e-22	0.001	0.000358658
chr8:17730623_rs2517293	PCM1	0.0973101	11.1683	1.62058e-22	2.82348e-19	1.62058e-22	0.001	0.000358658
chr1:20916238_rs66731853	CDA	-0.739662	-11.1583	1.73405e-22	1.78843e-19	1.73405e-22	0.001	0.000358658
chr1:31827159_rs2889730	FABP3	-0.257562	-11.1477	1.86203e-22	1.91378e-19	1.86203e-22	0.001	0.000358658
chr14:105637130_rs3784235	NUDT14	-0.293478	-11.1349	2.03008e-22	2.59414e-19	2.03008e-22	0.001	0.000358658
chr7:115680123_rs17302143	TFEC	0.112464	11.1276	2.13274e-22	1.73911e-19	2.13274e-22	0.001	0.000358658
chr5:7877831_rs161869	MTRR	0.134946	11.1235	2.19278e-22	1.80386e-19	2.19278e-22	0.001	0.000358658
chr20:25038484_rs66817095	ACSS1	-0.436648	-11.1218	2.21886e-22	2.3758e-19	2.21886e-22	0.001	0.000358658
chr10:91155186_rs303216	IFIT1	-0.138213	-11.1182	2.27316e-22	1.8658e-19	2.27316e-22	0.001	0.000358658
chr3:133369935_rs7632134	TOPBP1	-0.127167	-11.117	2.2914e-22	2.44779e-19	2.2914e-22	0.001	0.000358658
chr2:132259374_rs59915006	MZT2A	0.671529	11.1046	2.49188e-22	2.33063e-19	2.49188e-22	0.001	0.000358658
chr5:141309824_rs351260	KIAA0141	0.169162	11.0927	2.69876e-22	2.19171e-19	2.69876e-22	0.001	0.000358658
chr15:75131661_rs4886615	ULK3	0.242834	11.0907	2.73529e-22	2.93211e-19	2.73529e-22	0.001	0.000358658
chr17:43460891_rs114934705	PLEKHM1	-0.206761	-11.0886	2.77558e-22	2.7118e-19	2.77558e-22	0.001	0.000358658
chr7:149571466_rs7795944	ATP6V0E2	-0.709645	-11.0856	2.83131e-22	2.28365e-19	2.83131e-22	0.001	0.000358658
chr12:53406353_rs11170372	EIF4B	0.139358	11.0852	2.83985e-22	3.12293e-19	2.83985e-22	0.001	0.000358658
chr1:26901319_rs7726	RPS6KA1	-0.167202	-11.0786	2.96924e-22	2.99255e-19	2.96924e-22	0.001	0.000358658
chr21:16798463_rs2403967	NRIP1	-0.124971	-11.0767	3.00705e-22	7.33607e-19	3.00705e-22	0.001	0.000358658
chr8:142137704_rs6988905	DENND3	0.139968	11.0755	3.03173e-22	5.0339e-19	3.03173e-22	0.001	0.000358658
chr22:24323514_rs139012979	GSTTP2	4.38278	11.065	3.25334e-22	5.91093e-19	3.25334e-22	0.001	0.000358658
chr18:48416948_rs657111	ME2	-0.0865884	-11.0601	3.36312e-22	7.5319e-19	3.36312e-22	0.001	0.000358658
chr11:128420926_rs4245079	ETS1	-0.232606	-11.0574	3.42478e-22	4.30768e-19	3.42478e-22	0.001	0.000358658
chr1:28211403_rs1467465	THEMIS2	0.10733	11.0518	3.55618e-22	3.56595e-19	3.55618e-22	0.001	0.000358658
chr12:47383363_rs61228569	SLC38A2	-0.401462	-11.0507	3.58405e-22	3.85932e-19	3.58405e-22	0.001	0.000358658
chr12:10118262_rs143570786	CLEC12A	-0.475182	-11.0404	3.83934e-22	4.12438e-19	3.83934e-22	0.001	0.000358658
chr1:151937938_rs7554859	S100A10	0.128294	11.0381	3.90077e-22	3.88961e-19	3.90077e-22	0.001	0.000358658
chr6:3003970_rs138616686	NQO2	0.341153	11.0342	4.00548e-22	2.04004e-19	4.00548e-22	0.001	0.000358658
chr21:46294986_rs235374	PTTG1IP	-0.116944	-11.0322	4.05853e-22	9.86772e-19	4.05853e-22	0.001	0.000358658
chr3:126689501_rs4679135	PLXNA1	-0.209985	-11.0229	4.32071e-22	4.51152e-19	4.32071e-22	0.001	0.000358658
chr19:8523006_rs34244685	2018-03-02	1899-12-29 20:11:20	-11.0124	4.63674e-22	1.27439e-18	4.63674e-22	0.001	0.000358658
chr6:7312590_rs2764094	SSR1	0.0834807	11.0075	4.79233e-22	2.427e-19	4.79233e-22	0.001	0.000358658
chr20:34121682_rs191657037	ERGIC3	0.226613	10.9893	5.41599e-22	5.67507e-19	5.41599e-22	0.001	0.000358658
chr22:38196474_rs5756822	H1F0	0.280996	10.9889	5.43292e-22	9.62211e-19	5.43292e-22	0.001	0.000358658
chr2:191197941_rs291429	HIBCH	-0.223384	-10.9861	5.53733e-22	5.03212e-19	5.53733e-22	0.001	0.000358658
chr4:37831483_rs28373112	PGM2	-0.505881	-10.9854	5.56213e-22	5.98997e-19	5.56213e-22	0.001	0.000358658
chr6:37211717_rs2842618	TMEM217	-0.311673	-10.9829	5.65707e-22	2.84603e-19	5.65707e-22	0.001	0.000358658
chr7:150312151_rs34208822	GIMAP8	-0.368867	-10.9795	5.7879e-22	4.56192e-19	5.7879e-22	0.001	0.000358658
chr19:35681120_rs7248450	FXYD5	0.162059	10.9794	5.79261e-22	1.57882e-18	5.79261e-22	0.001	0.000358658
chr6:28168033_rs1150691	ZSCAN26	-0.349469	-10.9742	5.99825e-22	3.00881e-19	5.99825e-22	0.001	0.000358658
chr1:31892911_rs4949399	SERINC2	0.54057	10.9642	6.4153e-22	6.18595e-19	6.4153e-22	0.001	0.000358658
chr2:110274179_rs11692886	2018-09-10	05:35:51.498000	10.9636	6.44206e-22	5.81416e-19	6.44206e-22	0.001	0.000358658
chr2:27685388_rs780110	NRBP1	0.0907725	10.9599	6.60366e-22	5.95417e-19	6.60366e-22	0.001	0.000358658
chr4:6613462_rs6446515	MAN2B2	0.166138	10.9583	6.67429e-22	7.11301e-19	6.67429e-22	0.001	0.000358658
chr1:226594038_rs2695242	PARP1	0.138397	10.9566	6.75173e-22	6.48813e-19	6.75173e-22	0.001	0.000358658
chr19:38753786_rs7253245	SPINT2	0.11217	10.9505	7.03633e-22	1.90511e-18	7.03633e-22	0.001	0.000358658
chr10:33207497_rs2488326	ITGB1	0.114851	10.9488	7.11616e-22	5.70589e-19	7.11616e-22	0.001	0.000358658
chr15:63224506_rs6494371	TPM1	-0.455359	-10.9471	7.19557e-22	7.19993e-19	7.19557e-22	0.001	0.000358658
chr17:61780793_rs13380863	SMARCD2	-0.102495	-10.9376	7.67243e-22	7.14973e-19	7.67243e-22	0.001	0.000358658
chr12:113357193_rs10774671	OAS1	0.104361	10.9322	7.9566e-22	8.30156e-19	7.9566e-22	0.001	0.000358658
chr19:56278006_rs5028531	RFPL4A	-3.69589	-10.9129	9.0591e-22	2.42469e-18	9.0591e-22	0.001	0.000358658
chr3:194868944_rs2279634	XXYLT1-AS2	0.403697	10.9092	9.2824e-22	9.48161e-19	9.2824e-22	0.001	0.000358658
chr12:58171726_rs10877018	CYP27B1	-0.336559	-10.8934	1.03288e-21	1.0727e-18	1.03288e-21	0.001	0.000358658
chr7:100775986_rs2227673	SERPINE1	-0.396129	-10.8867	1.07975e-21	8.22285e-19	1.07975e-21	0.001	0.000358658
chr20:30621590_rs6058513	HCK	0.084626	10.8821	1.1139e-21	1.12979e-18	1.1139e-21	0.001	0.000358658
chr11:110247022_rs59355054	FDX1	-0.281414	-10.879	1.1374e-21	1.37213e-18	1.1374e-21	0.001	0.000358658
chr15:75700191_rs8029394	MAN2C1	-0.150649	-10.8786	1.14051e-21	1.10474e-18	1.14051e-21	0.001	0.000358658
chr9:139798002_rs17250281	TRAF2	-0.135596	-10.8617	1.27765e-21	1.63104e-18	1.27765e-21	0.001	0.000358658
chr17:80709227_rs2451218	TBCD	0.149151	10.8535	1.34954e-21	1.24048e-18	1.34954e-21	0.001	0.000358658
chr1:229461801_rs237802	CCSAP	0.183711	10.8502	1.37982e-21	1.25069e-18	1.37982e-21	0.001	0.000358658
chr13:80397301_rs4283116	SPRY2	-0.36811	-10.8427	1.45126e-21	2.66787e-18	1.45126e-21	0.001	0.000358658
chr1:76137606_rs12134854	ACADM	-0.17496	-10.8375	1.50248e-21	1.35453e-18	1.50248e-21	0.001	0.000358658
chr2:71662826_rs7562587	ZNF638	0.169602	10.8318	1.56169e-21	1.3738e-18	1.56169e-21	0.001	0.000358658
chr5:159846074_rs17057781	SLU7	-0.118764	-10.8271	1.61212e-21	1.16595e-18	1.61212e-21	0.001	0.000358658
chr2:9648215_rs10211522	IAH1	0.201125	10.8223	1.66465e-21	1.46229e-18	1.66465e-21	0.001	0.000358658
chr22:41683386_rs9611543	ZC3H7B	0.100257	10.8221	1.66609e-21	2.81175e-18	1.66609e-21	0.001	0.000358658
chr12:69748397_rs57954211	LYZ	0.307175	10.8209	1.67957e-21	1.70946e-18	1.67957e-21	0.001	0.000358658
chr1:23061958_rs2043970	EPHB2	0.37987	10.8205	1.68486e-21	1.48957e-18	1.68486e-21	0.001	0.000358658
chr1:201415100_rs7512452	PHLDA3	-0.454748	-10.8133	1.76775e-21	1.55874e-18	1.76775e-21	0.001	0.000358658
chr9:114961298_rs10981307	PTBP3	0.159865	10.8133	1.76778e-21	2.205e-18	1.76778e-21	0.001	0.000358658
chr5:134782414_rs12518053	TIFAB	0.245494	10.8067	1.848e-21	1.32769e-18	1.848e-21	0.001	0.000358658
chr2:15731605_rs4668936	DDX1	-0.11197	-10.795	1.99856e-21	1.74811e-18	1.99856e-21	0.001	0.000358658
chr7:76835989_rs12672775	FGL2	0.18517	10.7928	2.02908e-21	1.51901e-18	2.02908e-21	0.001	0.000358658
chr19:3062857_rs11539938	AES	0.463212	10.7903	2.06344e-21	5.32261e-18	2.06344e-21	0.001	0.000358658
chr11:102647552_rs3819099	MMP10	-1.90434	-10.79	2.06664e-21	2.43561e-18	2.06664e-21	0.001	0.000358658
chr13:111566790_rs56050731	ANKRD10	0.125329	10.7893	2.07672e-21	3.75876e-18	2.07672e-21	0.001	0.000358658
chr15:63788267_rs11636087	USP3	-0.155918	-10.7882	2.09271e-21	1.9233e-18	2.09271e-21	0.001	0.000358658
chr6:159065172_rs9364985	SYTL3	-0.165592	-10.7847	2.14154e-21	1.01883e-18	2.14154e-21	0.001	0.000358658
chr15:68571479_rs10152450	FEM1B	0.0797543	10.7659	2.42915e-21	2.21597e-18	2.42915e-21	0.001	0.000358658
chr10:32179523_rs1541261	ARHGAP12	0.158291	10.7592	2.54046e-21	1.93173e-18	2.54046e-21	0.001	0.000358658
chr20:36791314_rs7270605	TGM2	0.472492	10.7436	2.82138e-21	2.76205e-18	2.82138e-21	0.001	0.000358658
chr12:51783420_rs10876169	GALNT6	-0.181113	-10.736	2.96925e-21	2.94148e-18	2.96925e-21	0.001	0.000358658
chr5:72236003_rs63215760	FCHO2	0.155143	10.7269	3.15481e-21	2.20747e-18	3.15481e-21	0.001	0.000358658
chr10:29759225_rs11007607	PTCHD3P1	-0.157736	-10.7205	3.29192e-21	2.46302e-18	3.29192e-21	0.001	0.000358658
chr19:51642784_rs12983058	SIGLEC7	-0.275805	-10.7115	3.49712e-21	8.79431e-18	3.49712e-21	0.001	0.000358658
chr4:190901780_rs11727742	LOC100288255	-0.974732	-10.6982	3.8242e-21	3.69344e-18	3.8242e-21	0.001	0.000358658
chr16:75342846_rs10871308	CFDP1	0.141714	10.6876	4.10438e-21	4.54849e-18	4.10438e-21	0.001	0.000358658
chr9:123998342_rs10760159	GSN	-0.135148	-10.6791	4.34471e-21	5.2523e-18	4.34471e-21	0.001	0.000358658
chr21:15895328_rs13051840	SAMSN1	0.181582	10.6728	4.53206e-21	9.84042e-18	4.53206e-21	0.001	0.000358658
chr3:58036792_rs839230	FLNB	0.410095	10.6504	5.26469e-21	5.10048e-18	5.26469e-21	0.001	0.000358658
chr15:42202647_rs28547280	EHD4	-0.0691709	-10.6478	5.35571e-21	4.68243e-18	5.35571e-21	0.001	0.000358658
chr5:81800666_rs148945323	VCAN	-0.532987	-10.6349	5.8388e-21	3.97443e-18	5.8388e-21	0.001	0.000358658
chr11:68837252_rs10896412	TPCN2	-0.315233	-10.6325	5.93121e-21	6.56658e-18	5.93121e-21	0.001	0.000358658
chr1:182558516_rs2274509	RNASEL	0.161517	10.6302	6.02296e-21	5.12091e-18	6.02296e-21	0.001	0.000358658
chr4:26160969_rs7699560	RBPJ	-0.162734	-10.6297	6.04534e-21	5.58031e-18	6.04534e-21	0.001	0.000358658
chr16:89627460_rs2280370	RPL13	0.112218	10.6288	6.08012e-21	6.62204e-18	6.08012e-21	0.001	0.000358658
chr6:139480093_rs2327934	HECA	0.0992278	10.6279	6.11837e-21	2.80379e-18	6.11837e-21	0.001	0.000358658
chr22:39714704_rs1569498	PDGFB	0.270952	10.626	6.19597e-21	9.64234e-18	6.19597e-21	0.001	0.000358658
chr1:192786745_rs12752408	RGS2	-0.201504	-10.6184	6.51698e-21	5.51989e-18	6.51698e-21	0.001	0.000358658
chr3:150102666_rs56782857	TSC22D2	-0.33159	-10.6155	6.64651e-21	6.37158e-18	6.64651e-21	0.001	0.000358658
chr16:72134831_rs2269918	DHX38	-0.0771083	-10.6123	6.78874e-21	7.30995e-18	6.78874e-21	0.001	0.000358658
chr11:75118158_rs3094304	RPS3	0.12488	10.5985	7.44545e-21	8.18947e-18	7.44545e-21	0.001	0.000358658
chr16:1297810_rs4984779	TPSD1	-1.83566	-10.5772	8.58122e-21	9.17997e-18	8.58122e-21	0.001	0.000358658
chr2:99196483_rs17033813	UNC50	0.122836	10.5721	8.87861e-21	7.38888e-18	8.87861e-21	0.001	0.000358658
chr1:23432346_rs1208930	KDM1A	-0.105728	-10.57	9.00805e-21	7.56277e-18	9.00805e-21	0.001	0.000358658
chr5:175083754_rs2963854	HRH2	0.195582	10.5599	9.63129e-21	6.43482e-18	9.63129e-21	0.001	0.000358658
chr1:24220662_rs7550371	FUCA1	-0.420962	-10.5587	9.70917e-21	8.12971e-18	9.70917e-21	0.001	0.000358658
chr11:207410_rs58692051	BET1L	0.126136	10.5516	1.01835e-20	1.10537e-17	1.01835e-20	0.001	0.000358658
chr1:84959734_rs7524576	GNG5	-0.104792	-10.5434	1.07563e-20	8.98122e-18	1.07563e-20	0.001	0.000358658
chr5:95995733_rs2351245	CAST	-0.143088	-10.5396	1.10299e-20	7.34661e-18	1.10299e-20	0.001	0.000358658
chr3:48723302_rs6792510	NCKIPSD	-0.167001	-10.5222	1.23908e-20	1.16786e-17	1.23908e-20	0.001	0.000358658
chr9:130193725_rs4400486	RPL12	-0.0942912	-10.5185	1.27e-20	1.42584e-17	1.27e-20	0.001	0.000358658
chr8:87373404_rs7816275	CPNE3	-0.119004	-10.5135	1.31249e-20	1.83812e-17	1.31249e-20	0.001	0.000358658
chr11:57078721_rs3935068	TNKS1BP1	0.307514	10.5124	1.32219e-20	1.41417e-17	1.32219e-20	0.001	0.000358658
chr2:127863029_rs7583814	BIN1	0.398827	10.5042	1.39699e-20	1.14552e-17	1.39699e-20	0.001	0.000358658
chr15:40331699_rs72731415	SRP14	0.0824617	10.4965	1.47002e-20	1.19075e-17	1.47002e-20	0.001	0.000358658
chr5:81574925_rs226197	RPS23	-0.104614	-10.496	1.47515e-20	9.75807e-18	1.47515e-20	0.001	0.000358658
chr11:57333893_rs61887019	UBE2L6	-0.116547	-10.4834	1.60421e-20	1.70504e-17	1.60421e-20	0.001	0.000358658
chr21:38432325_rs1235345	TTC3	0.117769	10.4767	1.6772e-20	3.32312e-17	1.6772e-20	0.001	0.000358658
chr3:158461986_rs57262841	RARRES1	0.857614	10.4738	1.71094e-20	1.59007e-17	1.71094e-20	0.001	0.000358658
chr6:37931259_rs6917668	ZFAND3	-0.0790354	-10.4708	1.74479e-20	7.47831e-18	1.74479e-20	0.001	0.000358658
chr11:108591329_rs4753847	DDX10	0.268912	10.4669	1.79126e-20	1.89883e-17	1.79126e-20	0.001	0.000358658
chr6:170862051_rs4710839	PSMB1	0.0797299	10.4529	1.96633e-20	8.3748e-18	1.96633e-20	0.001	0.000358658
chr7:38027287_rs17171245	EPDR1	0.465942	10.4523	1.97348e-20	1.35303e-17	1.97348e-20	0.001	0.000358658
chr7:106827512_rs10953529	COG5	-0.169464	-10.4518	1.98003e-20	1.35706e-17	1.98003e-20	0.001	0.000358658
chr1:203199404_rs113689597	CHIT1	-4.25947	-10.4404	2.13668e-20	1.7251e-17	2.13668e-20	0.001	0.000358658
chr17:46097153_rs757352	CDK5RAP3	0.148856	10.439	2.15625e-20	1.7788e-17	2.15625e-20	0.001	0.000358658
chr3:184426945_rs10937186	MAGEF1	0.333132	10.4315	2.26707e-20	2.08329e-17	2.26707e-20	0.001	0.000358658
chr2:160439051_rs1549385	BAZ2B	-0.106751	-10.4152	2.52671e-20	2.03608e-17	2.52671e-20	0.001	0.000358658
chr12:124214694_rs7974462	ATP6V0A2	0.168337	10.4147	2.53461e-20	2.32962e-17	2.53461e-20	0.001	0.000358658
chr1:232767895_rs7527321	SIPA1L2	-0.178287	-10.4011	2.77421e-20	2.21873e-17	2.77421e-20	0.001	0.000358658
chr1:150587140_rs11204680	ENSA	-0.070145	-10.3948	2.89247e-20	2.30813e-17	2.89247e-20	0.001	0.000358658
chr8:101392568_rs60810270	RNF19A	-0.104449	-10.3915	2.95663e-20	3.90838e-17	2.95663e-20	0.001	0.000358658
chr9:33437244_rs34239839	AQP3	-0.29429	-10.3807	3.17694e-20	3.34847e-17	3.17694e-20	0.001	0.000358658
chr1:175965010_rs148677242	RFWD2	-0.0973036	-10.3773	3.24976e-20	2.57748e-17	3.24976e-20	0.001	0.000358658
chr12:54951612_rs3782405	PDE1B	0.32502	10.377	3.25633e-20	2.97392e-17	3.25633e-20	0.001	0.000358658
chr1:6701468_rs11122112	THAP3	0.276487	10.3684	3.44842e-20	2.72777e-17	3.44842e-20	0.001	0.000358658
chr14:23600662_rs12436035	SLC7A8	0.329064	10.3637	3.55625e-20	3.72026e-17	3.55625e-20	0.001	0.000358658
chr19:39348010_rs8110679	ECH1	0.141053	10.3587	3.67624e-20	8.4961e-17	3.67624e-20	0.001	0.000358658
chr17:74377694_rs1713399	SPHK1	-0.20367	-10.358	3.69425e-20	2.97268e-17	3.69425e-20	0.001	0.000358658
chr22:24257337_rs1002286	GSTT1	-2.51583	-10.3517	3.85256e-20	5.4915e-17	3.85256e-20	0.001	0.000358658
chr5:177016095_rs186803	TMED9	-0.075876	-10.3477	3.95534e-20	2.46962e-17	3.95534e-20	0.001	0.000358658
chr3:50332697_rs13100173	HYAL3	0.261663	10.3439	4.05803e-20	3.6596e-17	4.05803e-20	0.001	0.000358658
chr12:30831037_rs10771757	IPO8	0.124006	10.3407	4.14345e-20	3.76018e-17	4.14345e-20	0.001	0.000358658
chr7:648391_rs71518318	PRKAR1B	0.946677	10.3391	4.18795e-20	2.76026e-17	4.18795e-20	0.001	0.000358658
chr12:51237816_rs861204	ATF1	-0.135387	-10.3336	4.34442e-20	3.92901e-17	4.34442e-20	0.001	0.000358658
chr9:17359939_rs7037111	CNTLN	0.126539	10.3271	4.53711e-20	4.68309e-17	4.53711e-20	0.001	0.000358658
chr19:574301_rs7259828	BSG	-0.191113	-10.3225	4.67647e-20	1.07219e-16	4.67647e-20	0.001	0.000358658
chr10:14737912_rs2688838	FAM107B	-0.24441	-10.3165	4.86548e-20	3.32292e-17	4.86548e-20	0.001	0.000358658
chr19:3763575_rs4807507	MRPL54	-0.140534	-10.2762	6.35725e-20	1.44473e-16	6.35725e-20	0.001	0.000358658
chr1:160661038_rs11265468	CD48	-0.331599	-10.2753	6.39558e-20	4.88774e-17	6.39558e-20	0.001	0.000358658
chr9:129567344_rs1360138	ZBTB43	0.200284	10.2706	6.59551e-20	6.67532e-17	6.59551e-20	0.001	0.000358658
chr6:137036944_rs111384311	MAP3K5	-0.212226	-10.2692	6.65852e-20	2.68501e-17	6.65852e-20	0.001	0.000358658
chr5:179301260_rs272441	TBC1D9B	-0.221009	-10.268	6.7103e-20	4.10412e-17	6.7103e-20	0.001	0.000358658
chr2:47773640_rs34388623	MSH2	-0.381892	-10.2669	6.76266e-20	5.15315e-17	6.76266e-20	0.001	0.000358658
chr7:140336457_rs117393945	ADCK2	0.432197	10.2544	7.34741e-20	4.70108e-17	7.34741e-20	0.001	0.000358658
chr3:160917672_rs9852919	NMD3	-0.228087	-10.2434	7.90067e-20	6.9811e-17	7.90067e-20	0.001	0.000358658
chr14:35439294_rs12050457	SRP54	-0.0830757	-10.2433	7.904e-20	8.13707e-17	7.904e-20	0.001	0.000358658
chr11:77701861_rs3819256	INTS4	-0.146457	-10.2428	7.92942e-20	7.70936e-17	7.92942e-20	0.001	0.000358658
chr9:139377405_rs76259794	SEC16A	0.116075	10.239	8.13206e-20	8.17515e-17	8.13206e-20	0.001	0.000358658
chr1:150718602_rs75056606	CTSS	0.162528	10.226	8.86506e-20	6.67771e-17	8.86506e-20	0.001	0.000358658
chr22:29174770_rs5762788	XBP1	0.102221	10.221	9.16148e-20	1.24114e-16	9.16148e-20	0.001	0.000358658
chr19:39730301_rs958039	IFNL3	0.330953	10.2138	9.61042e-20	2.14628e-16	9.61042e-20	0.001	0.000358658
chr4:186125023_rs3112881	KIAA1430	-0.187028	-10.2113	9.77094e-20	7.57623e-17	9.77094e-20	0.001	0.000358658
chr1:227125997_rs7513120	ADCK3	-0.150558	-10.2082	9.97352e-20	7.46954e-17	9.97352e-20	0.001	0.000358658
chr3:119346276_rs56197198	PLA1A	0.269586	10.2025	1.03547e-19	9.05683e-17	1.03547e-19	0.001	0.000358658
chr10:16864327_rs780634	RSU1	-0.11461	-10.1927	1.10479e-19	7.17969e-17	1.10479e-19	0.001	0.000358658
chr9:116252223_rs112750936	POLE3	0.200401	10.1924	1.10746e-19	1.09448e-16	1.10746e-19	0.001	0.000358658
chr7:56183241_rs59381365	PSPH	0.103167	10.1893	1.13012e-19	7.10826e-17	1.13012e-19	0.001	0.000358658
chr11:2923826_rs367035	SLC22A18	0.380251	10.1853	1.16014e-19	1.11313e-16	1.16014e-19	0.001	0.000358658
chr17:73261276_rs8067326	MRPS7	-0.151835	-10.1825	1.18232e-19	9.07868e-17	1.18232e-19	0.001	0.000358658
chr19:14885614_rs12459485	EMR2	0.324342	10.1824	1.18251e-19	2.61824e-16	1.18251e-19	0.001	0.000358658
chr20:23103867_rs844881	CD93	-0.783271	-10.1798	1.20362e-19	9.49004e-17	1.20362e-19	0.001	0.000358658
chr13:95248905_rs9516437	GPR180	-0.114613	-10.1768	1.22718e-19	1.76168e-16	1.22718e-19	0.001	0.000358658
chr22:19420306_rs12165902	MRPL40	0.129457	10.1762	1.23233e-19	1.64382e-16	1.23233e-19	0.001	0.000358658
chr12:129312833_rs10437810	SLC15A4	0.171612	10.1747	1.24425e-19	1.08939e-16	1.24425e-19	0.001	0.000358658
chr11:117712887_rs473057	FXYD6-FXYD2	0.204692	10.1739	1.25109e-19	1.19969e-16	1.25109e-19	0.001	0.000358658
chr7:75264344_rs1179633	HIP1	-0.225957	-10.1673	1.30727e-19	8.19372e-17	1.30727e-19	0.001	0.000358658
chr10:135197419_rs4240520	PAOX	-0.261221	-10.1608	1.36431e-19	8.69858e-17	1.36431e-19	0.001	0.000358658
chr21:35391048_rs2834344	MRPS6	-0.371553	-10.1561	1.40721e-19	2.45576e-16	1.40721e-19	0.001	0.000358658
chr1:20857630_rs2000366	MUL1	-0.217824	-10.1466	1.49863e-19	1.10111e-16	1.49863e-19	0.001	0.000358658
chr6:3146632_rs28610207	TUBB2B	-0.555116	-10.1393	1.57232e-19	6.13659e-17	1.57232e-19	0.001	0.000358658
chr18:21616397_rs11082899	TTC39C	0.211087	10.1333	1.63644e-19	2.70426e-16	1.63644e-19	0.001	0.000358658
chr8:146008536_rs35298220	RPL8	0.0768848	10.1277	1.69812e-19	1.99588e-16	1.69812e-19	0.001	0.000358658
chr10:76970613_rs11543	VDAC2	0.0695507	10.1271	1.70502e-19	1.06527e-16	1.70502e-19	0.001	0.000358658
chr22:37258503_rs4821544	NCF4	0.162757	10.1244	1.7354e-19	2.25374e-16	1.7354e-19	0.001	0.000358658
chr9:21238127_rs10964930	IFNA4	-1.12456	-10.1221	1.76235e-19	1.62246e-16	1.76235e-19	0.001	0.000358658
chr3:16414473_rs689876	RFTN1	-0.143665	-10.1209	1.77622e-19	1.52397e-16	1.77622e-19	0.001	0.000358658
chr11:4414873_rs1426378	TRIM21	0.0796078	10.1196	1.79054e-19	1.70074e-16	1.79054e-19	0.001	0.000358658
chr11:117059794_rs7933134	SIK3	0.169815	10.1162	1.83194e-19	1.73751e-16	1.83194e-19	0.001	0.000358658
chr17:33760649_rs2671832	SLFN12	0.144241	10.1015	2.01854e-19	1.51241e-16	2.01854e-19	0.001	0.000358658
chr2:24346029_rs74883678	FKBP1B	-0.236595	-10.0964	2.08778e-19	1.49563e-16	2.08778e-19	0.001	0.000358658
chr15:90389045_rs4932146	ANPEP	0.129056	10.0884	2.20102e-19	1.51637e-16	2.20102e-19	0.001	0.000358658
chr1:111436858_rs1936943	CD53	0.0997289	10.08	2.32619e-19	1.66814e-16	2.32619e-19	0.001	0.000358658
chr8:649077_rs12550549	ERICH1	-0.149539	-10.0792	2.3387e-19	2.66603e-16	2.3387e-19	0.001	0.000358658
chr14:55363592_rs143115013	MAPK1IP1L	-0.0768249	-10.0762	2.38492e-19	2.37959e-16	2.38492e-19	0.001	0.000358658
chr22:18081136_rs2287228	ATP6V1E1	0.119864	10.0681	2.51513e-19	3.20708e-16	2.51513e-19	0.001	0.000358658
chr10:75464587_rs4745721	SEC24C	0.0688917	10.0663	2.5457e-19	1.54906e-16	2.5457e-19	0.001	0.000358658
chr7:150067640_rs3757425	REPIN1	-0.113743	-10.0652	2.56351e-19	1.56359e-16	2.56351e-19	0.001	0.000358658
chr15:78824924_rs12438659	AGPHD1	0.117633	10.0633	2.59583e-19	1.77083e-16	2.59583e-19	0.001	0.000358658
chr7:98985396_rs2404323	ARPC1B	-0.0877773	-10.0513	2.81025e-19	1.7018e-16	2.81025e-19	0.001	0.000358658
chr11:34945228_rs2986409	PDHX	0.115144	10.0507	2.82076e-19	2.62124e-16	2.82076e-19	0.001	0.000358658
chr17:5284770_rs1065483	RABEP1	-0.0988315	-10.048	2.87199e-19	2.10745e-16	2.87199e-19	0.001	0.000358658
chr21:47682653_rs12626725	MCM3AP	-0.0632982	-10.0438	2.95328e-19	4.892e-16	2.95328e-19	0.001	0.000358658
chr10:93888810_rs142709162	2018-03-05	03:03:25.988000	10.0425	2.97883e-19	1.79374e-16	2.97883e-19	0.001	0.000358658
chr8:25318253_rs17053743	KCTD9	-0.105535	-10.042	2.9868e-19	3.33668e-16	2.9868e-19	0.001	0.000358658
chr7:16669244_rs13230918	ANKMY2	-0.17043	-10.0395	3.03651e-19	1.83262e-16	3.03651e-19	0.001	0.000358658
chr6:13854341_rs12662221	MCUR1	-0.208781	-10.0348	3.13236e-19	1.18074e-16	3.13236e-19	0.001	0.000358658
chr1:79094081_rs1333973	IFI44L	0.0950698	10.0323	3.18408e-19	2.25136e-16	3.18408e-19	0.001	0.000358658
chr16:31114234_rs61162043	PRSS53	0.123455	10.0309	3.21363e-19	2.98499e-16	3.21363e-19	0.001	0.000358658
chr3:182624759_rs4859144	ATP11B	0.0783154	10.0282	3.27282e-19	2.77302e-16	3.27282e-19	0.001	0.000358658
chr3:69091237_rs12054469	TMF1	0.0976106	10.0257	3.32658e-19	2.81708e-16	3.32658e-19	0.001	0.000358658
chr10:72594458_rs7912398	SGPL1	-0.114376	-10.0137	3.60078e-19	2.14327e-16	3.60078e-19	0.001	0.000358658
chr19:55474210_rs4422092	NLRP2	-1.3088	-10.0115	3.65276e-19	7.75539e-16	3.65276e-19	0.001	0.000358658
chr9:116006367_rs10739391	FKBP15	-0.111995	-10.0089	3.714e-19	3.23386e-16	3.714e-19	0.001	0.000358658
chr16:87456077_rs11641296	ZCCHC14	0.259529	10.0057	3.79393e-19	3.5108e-16	3.79393e-19	0.001	0.000358658
chr14:45692763_rs8010456	MIS18BP1	0.195471	10.005	3.81253e-19	3.70997e-16	3.81253e-19	0.001	0.000358658
chr20:2824849_rs16988130	VPS16	0.170558	9.98859	4.24629e-19	3.23067e-16	4.24629e-19	0.001	0.000358658
chr20:36325944_rs73290822	CTNNBL1	0.132547	9.98787	4.26644e-19	3.24438e-16	4.26644e-19	0.001	0.000358658
chr17:5488352_rs925598	NLRP1	0.282514	9.9877	4.27134e-19	3.09991e-16	4.27134e-19	0.001	0.000358658
chr3:67422124_rs1979640	SUCLG2	-0.141332	-9.98764	4.27292e-19	3.589e-16	4.27292e-19	0.001	0.000358658
chr15:75895906_rs112184604	SNUPN	0.166939	9.98105	4.46218e-19	2.94704e-16	4.46218e-19	0.001	0.000358658
chr1:169080837_rs1200138	ATP1B1	0.267758	9.97714	4.57836e-19	3.18128e-16	4.57836e-19	0.001	0.000358658
chr17:44662558_rs117692492	NSFP1	1.4743	9.97506	4.64129e-19	3.36175e-16	4.64129e-19	0.001	0.000358658
chr4:7865045_rs7375284	AFAP1	0.226464	9.97265	4.71537e-19	3.35506e-16	4.71537e-19	0.001	0.000358658
chr1:243446718_rs12067370	SDCCAG8	-0.127486	-9.97115	4.76229e-19	3.3035e-16	4.76229e-19	0.001	0.000358658
chr5:131578608_rs4705927	P4HA2	-0.173181	-9.96942	4.81679e-19	2.81952e-16	4.81679e-19	0.001	0.000358658
chr17:26704830_rs12165032	VTN	0.672068	9.96896	4.83131e-19	3.48793e-16	4.83131e-19	0.001	0.000358658
chr22:26827335_rs880421	ASPHD2	-0.19363	-9.96419	4.98505e-19	6.08813e-16	4.98505e-19	0.001	0.000358658
chr14:67965452_rs11158671	PLEKHH1	-0.41362	-9.95837	5.17954e-19	4.97271e-16	5.17954e-19	0.001	0.000358658
chr1:179055949_rs72709448	TOR3A	-0.201429	-9.95567	5.27235e-19	3.64315e-16	5.27235e-19	0.001	0.000358658
chr15:32997667_rs11857190	GREM1	-0.636298	-9.95336	5.353e-19	3.50508e-16	5.353e-19	0.001	0.000358658
chr1:161665165_rs4656328	FCGR2C	0.628573	9.95174	5.41004e-19	3.73203e-16	5.41004e-19	0.001	0.000358658
chr2:68619306_rs72896005	PLEK	0.186731	9.9463	5.6071e-19	3.73708e-16	5.6071e-19	0.001	0.000358658
chr1:15944620_rs74057713	DDI2	0.112628	9.94078	5.81384e-19	3.99873e-16	5.81384e-19	0.001	0.000358658
chr4:84141696_rs6813292	PLAC8	-0.35653	-9.93956	5.86083e-19	4.12831e-16	5.86083e-19	0.001	0.000358658
chr11:34505926_rs12288820	CAT	0.15186	9.93877	5.89111e-19	5.34072e-16	5.89111e-19	0.001	0.000358658
chr1:167601020_rs72695390	RCSD1	0.288395	9.92972	6.25187e-19	4.29062e-16	6.25187e-19	0.001	0.000358658
chr9:80718738_rs10870047	GNAQ	-0.107151	-9.92736	6.34942e-19	5.41004e-16	6.34942e-19	0.001	0.000358658
chr10:104315667_rs10786679	TRIM8	-0.17876	-9.92671	6.3767e-19	3.68358e-16	6.3767e-19	0.001	0.000358658
chr2:216963733_rs56167614	XRCC5	0.0784056	9.9257	6.41914e-19	4.24987e-16	6.41914e-19	0.001	0.000358658
chr7:47973034_rs6955251	PKD1L1	-0.735507	-9.92031	6.6505e-19	3.77841e-16	6.6505e-19	0.001	0.000358658
chr20:389456_rs3746792	RBCK1	-0.0645433	-9.91631	6.82731e-19	5.09989e-16	6.82731e-19	0.001	0.000358658
chr16:84147846_rs60350150	MBTPS1	-0.115552	-9.91385	6.93844e-19	6.21104e-16	6.93844e-19	0.001	0.000358658
chr17:1618262_rs11078596	WDR81	0.128621	9.89613	7.79384e-19	5.4083e-16	7.79384e-19	0.001	0.000358658
chr18:47039902_rs112622413	RPL17	-0.583327	-9.89237	7.98853e-19	1.13649e-15	7.98853e-19	0.001	0.000358658
chr11:71752160_rs7115200	NUMA1	0.10732	9.87828	8.7614e-19	7.80997e-16	8.7614e-19	0.001	0.000358658
chr12:123163803_rs11059356	HCAR1	0.26742	9.87475	8.96699e-19	7.14551e-16	8.96699e-19	0.001	0.000358658
chr3:33087395_rs35480293	GLB1	0.114503	9.87259	9.09441e-19	7.50848e-16	9.09441e-19	0.001	0.000358658
chr19:48981869_rs11882635	CYTH2	0.184712	9.8716	9.15387e-19	1.84471e-15	9.15387e-19	0.001	0.000358658
chr2:152208416_rs7424176	TNFAIP6	0.185709	9.87134	9.16934e-19	6.00165e-16	9.16934e-19	0.001	0.000358658
chr5:148775729_rs10072615	PCYOX1L	-0.331905	-9.86614	9.48743e-19	5.45778e-16	9.48743e-19	0.001	0.000358658
chr16:11824903_rs1579258	TXNDC11	0.0868017	9.86435	9.599e-19	8.44866e-16	9.599e-19	0.001	0.000358658
chr19:54814429_rs8109873	LILRA5	-0.352954	-9.85675	1.00893e-18	2.01982e-15	1.00893e-18	0.001	0.000358658
chr9:191587_rs188549327	CBWD1	0.193266	9.85491	1.0212e-18	8.50876e-16	1.0212e-18	0.001	0.000358658
chr7:16809823_rs1824393	TSPAN13	-0.282015	-9.85172	1.0427e-18	5.81646e-16	1.0427e-18	0.001	0.000358658
chr11:13678324_rs76266441	FAR1	-0.174602	-9.8509	1.04833e-18	9.28822e-16	1.04833e-18	0.001	0.000358658
chr9:95901419_rs4743888	NINJ1	-0.144875	-9.84535	1.08716e-18	9.00433e-16	1.08716e-18	0.001	0.000358658
chr17:56024613_rs2585833	CUEDC1	-0.142922	-9.8433	1.10182e-18	7.50405e-16	1.10182e-18	0.001	0.000358658
chr15:66859558_rs35692936	ZWILCH	-0.155324	-9.84163	1.11394e-18	7.03485e-16	1.11394e-18	0.001	0.000358658
chr4:38793860_rs73236617	TLR1	0.44594	9.84158	1.11431e-18	7.71268e-16	1.11431e-18	0.001	0.000358658
chr10:27519841_rs79931679	ACBD5	-0.074204	-9.84055	1.12186e-18	6.25958e-16	1.12186e-18	0.001	0.000358658
chr5:115277077_rs60505018	AP3S1	-0.181174	-9.83992	1.12654e-18	6.44926e-16	1.12654e-18	0.001	0.000358658
chr9:34999992_rs10814192	VCP	-0.070269	-9.8315	1.19036e-18	9.78119e-16	1.19036e-18	0.001	0.000358658
chr17:29713300_rs2854333	EVI2A	-0.174849	-9.82891	1.2107e-18	8.20332e-16	1.2107e-18	0.001	0.000358658
chr16:88909095_rs35137494	GALNS	0.262114	9.82795	1.21831e-18	1.0617e-15	1.21831e-18	0.001	0.000358658
chr1:214446481_rs12031337	SMYD2	0.339327	9.82723	1.2241e-18	8.21029e-16	1.2241e-18	0.001	0.000358658
chr3:53925170_rs3733083	ACTR8	0.129676	9.82386	1.25141e-18	1.02313e-15	1.25141e-18	0.001	0.000358658
chr16:103423_rs2541593	POLR3K	-0.21592	-9.82258	1.26192e-18	1.09816e-15	1.26192e-18	0.001	0.000358658
chr1:8023586_rs34157438	PARK7	-0.112602	-9.8211	1.27421e-18	8.5357e-16	1.27421e-18	0.001	0.000358658
chr22:45557251_rs132841	NUP50	-0.0958851	-9.81653	1.31292e-18	1.49341e-15	1.31292e-18	0.001	0.000358658
chr18:71943922_rs72980478	CYB5A	0.226625	9.81513	1.32494e-18	1.85907e-15	1.32494e-18	0.001	0.000358658
chr18:661647_rs2847153	ENOSF1	-0.353006	-9.81163	1.35567e-18	1.89641e-15	1.35567e-18	0.001	0.000358658
chr9:209403_rs1360963	DOCK8	0.139417	9.80852	1.38356e-18	1.11731e-15	1.38356e-18	0.001	0.000358658
chr5:61661618_rs6863617	DIMT1	-0.233856	-9.80026	1.46037e-18	8.30615e-16	1.46037e-18	0.001	0.000358658
chr4:79474040_rs4975144	ANXA3	0.407663	9.79953	1.46733e-18	1.00427e-15	1.46733e-18	0.001	0.000358658
chr1:171754164_rs56178029	METTL13	-0.127982	-9.79132	1.54825e-18	1.03043e-15	1.54825e-18	0.001	0.000358658
chr2:61404931_rs2600667	AHSA2	0.145816	9.78132	1.65285e-18	1.05615e-15	1.65285e-18	0.001	0.000358658
chr12:53071382_rs2741159	KRT1	-0.709713	-9.77849	1.68375e-18	1.31031e-15	1.68375e-18	0.001	0.000358658
chr7:26150279_rs11971530	CBX3	0.109669	9.75134	2.01043e-18	1.10068e-15	2.01043e-18	0.001	0.000358658
chr10:51537475_rs7911198	TIMM23	-0.0745025	-9.74588	2.08342e-18	1.12383e-15	2.08342e-18	0.001	0.000358658
chr4:185570467_rs62339863	CASP3	-0.178054	-9.74458	2.10123e-18	1.41906e-15	2.10123e-18	0.001	0.000358658
chr8:23279174_rs59478886	ENTPD4	0.12142	9.74196	2.13741e-18	2.08178e-15	2.13741e-18	0.001	0.000358658
chr10:70930188_rs16926132	VPS26A	-0.118579	-9.74022	2.16193e-18	1.16463e-15	2.16193e-18	0.001	0.000358658
chr6:110797612_rs6920997	SLC22A16	0.502092	9.73921	2.17609e-18	7.56982e-16	2.17609e-18	0.001	0.000358658
chr11:118893878_rs111322300	TRAPPC4	-0.236664	-9.72868	2.33103e-18	1.99815e-15	2.33103e-18	0.001	0.000358658
chr8:6699486_rs2951830	DEFB1	0.693077	9.71919	2.47994e-18	2.39014e-15	2.47994e-18	0.001	0.000358658
chr4:25863375_rs6831024	SEL1L3	0.300599	9.7172	2.51227e-18	1.67383e-15	2.51227e-18	0.001	0.000358658
chr7:76935492_rs58731747	GSAP	-0.196438	-9.70366	2.74416e-18	1.48529e-15	2.74416e-18	0.001	0.000358658
chr16:90014732_rs77470350	TUBB3	-0.567783	-9.69881	2.83229e-18	2.36469e-15	2.83229e-18	0.001	0.000358658
chr1:247516964_rs2153630	ZNF496	-0.14557	-9.69338	2.93442e-18	1.91022e-15	2.93442e-18	0.001	0.000358658
chr1:155868625_rs2282301	RIT1	0.0967836	9.69222	2.95671e-18	1.92449e-15	2.95671e-18	0.001	0.000358658
chr1:198619686_rs1326270	PTPRC	0.08286	9.68501	3.09885e-18	2.01529e-15	3.09885e-18	0.001	0.000358658
chr19:41765407_rs4591267	HNRNPUL1	-0.0927745	-9.68361	3.12744e-18	5.7627e-15	3.12744e-18	0.001	0.000358658
chr12:473971_rs11835325	KDM5A	0.0797524	9.6762	3.28214e-18	2.49695e-15	3.28214e-18	0.001	0.000358658
chr3:179100929_rs140385861	MFN1	-0.223607	-9.67574	3.29192e-18	2.60607e-15	3.29192e-18	0.001	0.000358658
chr1:220189792_rs4846611	EPRS	0.165699	9.66877	3.44484e-18	2.23108e-15	3.44484e-18	0.001	0.000358658
chr1:205723572_rs823118	RAB7L1	-0.123769	-9.66405	3.55227e-18	2.29788e-15	3.55227e-18	0.001	0.000358658
chr17:47280536_rs6504602	GNGT2	0.417873	9.66347	3.5657e-18	2.29383e-15	3.5657e-18	0.001	0.000358658
chr4:113565835_rs79383654	LARP7	0.199916	9.66018	3.64299e-18	2.37954e-15	3.64299e-18	0.001	0.000358658
chr10:101976501_rs11591741	CWF19L1	-0.146364	-9.65652	3.73079e-18	1.95048e-15	3.73079e-18	0.001	0.000358658
chr5:133460935_rs75752784	SKP1	0.112733	9.64114	4.12353e-18	2.24984e-15	4.12353e-18	0.001	0.000358658
chr19:861421_rs1624707	CFD	0.453349	9.6409	4.12998e-18	7.48359e-15	4.12998e-18	0.001	0.000358658
chr9:79009366_rs11548955	RFK	-0.160131	-9.63675	4.24304e-18	3.23653e-15	4.24304e-18	0.001	0.000358658
chr13:20745288_rs7998246	GJB2	-0.689864	-9.63625	4.25701e-18	5.20085e-15	4.25701e-18	0.001	0.000358658
chr10:71272018_rs972570	TSPAN15	-0.231717	-9.63336	4.33773e-18	2.24891e-15	4.33773e-18	0.001	0.000358658
chr5:150410219_rs2233311	GPX3	0.256748	9.63313	4.34434e-18	2.36437e-15	4.34434e-18	0.001	0.000358658
chr8:105602964_rs4563861	LRP12	0.144949	9.62636	4.53979e-18	4.24796e-15	4.53979e-18	0.001	0.000358658
chr6:31103195_rs3094669	TRIM40	0.973349	9.61986	4.7357e-18	1.60394e-15	4.7357e-18	0.001	0.000358658
chr17:60093278_rs187838158	BRIP1	0.420261	9.61627	4.84767e-18	3.08018e-15	4.84767e-18	0.001	0.000358658
chr13:50327036_rs2146437	EBPL	0.252747	9.61514	4.88357e-18	5.92314e-15	4.88357e-18	0.001	0.000358658
chr6:42182183_rs1884317	MRPS10	-0.0998503	-9.61136	5.00481e-18	1.69125e-15	5.00481e-18	0.001	0.000358658
chr8:144778831_rs57272588	ZNF707	-0.293401	-9.61002	5.04879e-18	4.69111e-15	5.04879e-18	0.001	0.000358658
chr18:18535492_rs149529515	ROCK1	-0.182589	-9.60631	5.1719e-18	6.75252e-15	5.1719e-18	0.001	0.000358658
chr6:31603591_rs115366947	HSPA1B	-1.7162	-9.60465	5.22802e-18	1.76252e-15	5.22802e-18	0.001	0.000358658
chr16:1881145_rs8044343	HAGH	-0.136808	-9.59992	5.39131e-18	4.36249e-15	5.39131e-18	0.001	0.000358658
chr3:182869376_rs484095	LAMP3	0.162403	9.59759	5.47344e-18	4.22424e-15	5.47344e-18	0.001	0.000358658
chr17:14249167_rs3785655	HS3ST3A1	-2.2428	-9.5937	5.61348e-18	3.54768e-15	5.61348e-18	0.001	0.000358658
chr7:32908704_rs1045477	KBTBD2	0.0746089	9.59086	5.71802e-18	3.0225e-15	5.71802e-18	0.001	0.000358658
chr19:7480906_rs6603155	ARHGEF18	0.0923012	9.58917	5.78136e-18	1.02231e-14	5.78136e-18	0.001	0.000358658
chr3:139396758_rs10935341	NMNAT3	-0.302422	-9.58727	5.85317e-18	4.50968e-15	5.85317e-18	0.001	0.000358658
chr7:123395200_rs17146312	WASL	0.159382	9.58663	5.87738e-18	3.10331e-15	5.87738e-18	0.001	0.000358658
chr10:133758358_rs9419387	PPP2R2D	-0.121485	-9.56875	6.60097e-18	3.34865e-15	6.60097e-18	0.001	0.000358658
chr2:47148163_rs6716381	MCFD2	0.101026	9.56401	6.80746e-18	4.10299e-15	6.80746e-18	0.001	0.000358658
chr4:52812994_rs1607600	SGCB	0.381892	9.55536	7.20043e-18	4.57218e-15	7.20043e-18	0.001	0.000358658
chr10:75844559_rs11599181	ADK	-0.236745	-9.55223	7.34815e-18	3.70831e-15	7.34815e-18	0.001	0.000358658
chr1:8108754_rs225118	ERRFI1	0.247767	9.55012	7.44922e-18	4.6933e-15	7.44922e-18	0.001	0.000358658
chr17:48713223_rs10153257	ABCC3	0.276583	9.54487	7.70721e-18	4.79575e-15	7.70721e-18	0.001	0.000358658
chr1:160995934_rs61803671	F11R	0.178234	9.54075	7.91611e-18	4.96815e-15	7.91611e-18	0.001	0.000358658
chr7:27738872_rs11763499	TAX1BP1	-0.0589644	-9.53993	7.95824e-18	4.16515e-15	7.95824e-18	0.001	0.000358658
chr5:108756746_rs2963033	PJA2	0.0617112	9.53472	8.23176e-18	4.38384e-15	8.23176e-18	0.001	0.000358658
chr2:70934167_rs2863794	ADD2	0.340638	9.53295	8.32701e-18	4.97815e-15	8.32701e-18	0.001	0.000358658
chr17:1497626_rs11652773	SLC43A2	0.262172	9.53095	8.43531e-18	5.20726e-15	8.43531e-18	0.001	0.000358658
chr6:125622832_rs3734643	HDDC2	0.32219	9.50896	9.72745e-18	3.19467e-15	9.72745e-18	0.001	0.000358658
chr11:72460398_rs77464186	ARAP1	-0.119803	-9.50888	9.73261e-18	7.72698e-15	9.73261e-18	0.001	0.000358658
chr12:6629113_rs10849480	NCAPD2	0.100275	9.5033	1.00906e-17	7.33545e-15	1.00906e-17	0.001	0.000358658
chr10:61640320_rs1626088	CCDC6	0.138823	9.50185	1.01864e-17	5.06488e-15	1.01864e-17	0.001	0.000358658
chr11:126226663_rs683486	ST3GAL4	0.209762	9.50081	1.02547e-17	8.10349e-15	1.02547e-17	0.001	0.000358658
chr4:75196731_rs17829765	EREG	0.294457	9.4995	1.0342e-17	6.46696e-15	1.0342e-17	0.001	0.000358658
chr18:39531990_rs67084667	PIK3C3	0.129413	9.49943	1.03471e-17	1.32279e-14	1.03471e-17	0.001	0.000358658
chr7:35690812_rs2392376	HERPUD2	-0.0701962	-9.49836	1.04192e-17	5.40022e-15	1.04192e-17	0.001	0.000358658
chr1:117426406_rs12037202	PTGFRN	-0.38013	-9.49697	1.05128e-17	6.51606e-15	1.05128e-17	0.001	0.000358658
chr7:150312857_rs12535208	GIMAP1	-0.437843	-9.49147	1.08945e-17	5.63505e-15	1.08945e-17	0.001	0.000358658
chr17:4845768_rs238247	KIF1C	0.10093	9.4849	1.13676e-17	6.89104e-15	1.13676e-17	0.001	0.000358658
chr1:114972833_rs6692002	TRIM33	-0.0709116	-9.48366	1.1459e-17	7.07792e-15	1.1459e-17	0.001	0.000358658
chr15:63406785_rs6494391	LACTB	-0.104609	-9.47995	1.17378e-17	6.57717e-15	1.17378e-17	0.001	0.000358658
chr19:47266635_rs7249039	PRKD2	-0.14819	-9.47534	1.20936e-17	1.97618e-14	1.20936e-17	0.001	0.000358658
chr17:40698542_rs12453490	FAM134C	0.0977428	9.47092	1.2444e-17	7.47731e-15	1.2444e-17	0.001	0.000358658
chr16:15820863_rs16967494	NDE1	0.134131	9.46794	1.26863e-17	9.95848e-15	1.26863e-17	0.001	0.000358658
chr3:178741462_rs73187210	ZMAT3	0.270376	9.46096	1.32724e-17	9.96409e-15	1.32724e-17	0.001	0.000358658
chr7:158671205_rs4391371	WDR60	0.314798	9.45748	1.35745e-17	6.934e-15	1.35745e-17	0.001	0.000358658
chr9:84135839_rs7025692	TLE1	-0.254617	-9.45179	1.40834e-17	1.00299e-14	1.40834e-17	0.001	0.000358658
chr15:52842904_rs4776056	ARPP19	0.0916684	9.45172	1.40891e-17	7.80483e-15	1.40891e-17	0.001	0.000358658
chr16:75698311_rs111955632	KARS	0.0801239	9.45166	1.40953e-17	1.09911e-14	1.40953e-17	0.001	0.000358658
chr16:58744706_rs257649	GOT2	0.126451	9.44898	1.43414e-17	1.11513e-14	1.43414e-17	0.001	0.000358658
chr16:23590302_rs120961	GGA2	0.148862	9.44737	1.44917e-17	1.1254e-14	1.44917e-17	0.001	0.000358658
chr6:101230913_rs9404046	ASCC3	-0.245872	-9.44413	1.47979e-17	4.76343e-15	1.47979e-17	0.001	0.000358658
chr19:58896477_rs12608795	RPS5	0.0794641	9.44158	1.50438e-17	2.37983e-14	1.50438e-17	0.001	0.000358658
chr17:18271013_rs8080936	SMCR8	-0.173957	-9.43698	1.5498e-17	9.15926e-15	1.5498e-17	0.001	0.000358658
chr17:4673023_rs6502821	ZMYND15	0.297912	9.43273	1.59294e-17	9.39239e-15	1.59294e-17	0.001	0.000358658
chr1:8917212_rs914994	ENO1	0.0960955	9.43203	1.60019e-17	9.78454e-15	1.60019e-17	0.001	0.000358658
chr16:2986323_rs9928222	FLYWCH1	-0.252704	-9.42387	1.6868e-17	1.29164e-14	1.6868e-17	0.001	0.000358658
chr18:67524383_rs4891780	CD226	0.168792	9.42202	1.70706e-17	2.11477e-14	1.70706e-17	0.001	0.000358658
chr5:141358791_rs78904720	RNF14	0.120919	9.42013	1.72805e-17	9.03098e-15	1.72805e-17	0.001	0.000358658
chr17:40259980_rs2074154	DHX58	0.0746668	9.41832	1.74835e-17	1.02776e-14	1.74835e-17	0.001	0.000358658
chr5:79952426_rs1650694	DHFR	0.240494	9.41553	1.78011e-17	9.29184e-15	1.78011e-17	0.001	0.000358658
chr16:11421513_rs34898332	RMI2	0.140692	9.41044	1.83961e-17	1.4043e-14	1.83961e-17	0.001	0.000358658
chr9:33490315_rs2992825	NOL6	0.137621	9.40235	1.93825e-17	1.35497e-14	1.93825e-17	0.001	0.000358658
chr14:61922461_rs17256233	PRKCH	-0.635014	-9.39951	1.97404e-17	1.64914e-14	1.97404e-17	0.001	0.000358658
chr6:6331873_rs927332	F13A1	-0.239524	-9.39849	1.98706e-17	6.32082e-15	1.98706e-17	0.001	0.000358658
chr10:12020268_rs10795914	UPF2	-0.075334	-9.39758	1.99884e-17	9.61182e-15	1.99884e-17	0.001	0.000358658
chr2:119728472_rs35288880	MARCO	0.903294	9.39657	2.01193e-17	1.16536e-14	2.01193e-17	0.001	0.000358658
chr18:21441484_rs8093042	LAMA3	0.384067	9.39194	2.07286e-17	2.54398e-14	2.07286e-17	0.001	0.000358658
chr21:48092736_rs12483497	PRMT2	0.0972994	9.38976	2.10223e-17	2.41252e-14	2.10223e-17	0.001	0.000358658
chr3:57568444_rs7641375	ARF4	-0.0678935	-9.38611	2.15233e-17	1.57729e-14	2.15233e-17	0.001	0.000358658
chr20:5065093_rs6084993	TMEM230	-0.0797747	-9.38338	2.19057e-17	1.4999e-14	2.19057e-17	0.001	0.000358658
chr14:91094774_rs1107073	CALM1	0.114876	9.38323	2.19272e-17	1.82726e-14	2.19272e-17	0.001	0.000358658
chr5:179698554_rs6601105	MAPK9	0.111828	9.38132	2.21992e-17	1.15023e-14	2.21992e-17	0.001	0.000358658
chr1:26133099_rs6675604	SEPN1	-0.140382	-9.37165	2.36262e-17	1.41998e-14	2.36262e-17	0.001	0.000358658
chr3:126244850_rs12496524	CHST13	0.455752	9.36761	2.42507e-17	1.77066e-14	2.42507e-17	0.001	0.000358658
chr14:92588917_rs7151027	NDUFB1	0.121601	9.36669	2.43943e-17	2.02111e-14	2.43943e-17	0.001	0.000358658
chr3:33405164_rs55697420	UBP1	0.0742856	9.36596	2.45095e-17	1.78915e-14	2.45095e-17	0.001	0.000358658
chr7:73509326_rs2237503	LIMK1	0.151797	9.358	2.58003e-17	1.27696e-14	2.58003e-17	0.001	0.000358658
chr3:52532291_rs34736619	STAB1	-0.298936	-9.3516	2.68857e-17	1.95769e-14	2.68857e-17	0.001	0.000358658
chr7:32536955_rs13240797	AVL9	-0.0639272	-9.35157	2.68906e-17	1.32833e-14	2.68906e-17	0.001	0.000358658
chr15:64418221_rs2290119	SNX1	0.0810092	9.35026	2.71184e-17	1.43477e-14	2.71184e-17	0.001	0.000358658
chr1:9290707_rs34361557	H6PD	0.196877	9.34961	2.72332e-17	1.62817e-14	2.72332e-17	0.001	0.000358658
chr2:113940681_rs3748914	PSD4	-0.107822	-9.3363	2.96696e-17	1.69746e-14	2.96696e-17	0.001	0.000358658
chr2:26714534_rs6733921	OTOF	-0.73308	-9.33401	3.01103e-17	1.7208e-14	3.01103e-17	0.001	0.000358658
chr6:53442716_rs580430	GCLC	0.199356	9.33388	3.01351e-17	9.44265e-15	3.01351e-17	0.001	0.000358658
chr13:79220899_rs12585725	RNF219	0.130548	9.33209	3.04849e-17	3.31671e-14	3.04849e-17	0.001	0.000358658
chr7:150312151_rs34208822	GIMAP7	-0.263376	-9.32977	3.09438e-17	1.52138e-14	3.09438e-17	0.001	0.000358658
chr20:57280575_rs6100174	NPEPL1	0.181475	9.32778	3.13425e-17	2.11513e-14	3.13425e-17	0.001	0.000358658
chr21:40756675_rs10775662	WRB	0.206934	9.32348	3.22216e-17	3.57202e-14	3.22216e-17	0.001	0.000358658
chr20:44547174_rs114691855	PLTP	-2.5388	-9.32253	3.24191e-17	2.18335e-14	3.24191e-17	0.001	0.000358658
chr19:48757353_rs4544344	CARD8	-0.137411	-9.32213	3.25044e-17	4.92677e-14	3.25044e-17	0.001	0.000358658
chr7:75637839_rs79180770	STYXL1	-0.247021	-9.31959	3.30397e-17	1.61998e-14	3.30397e-17	0.001	0.000358658
chr3:184026703_rs6845	PSMD2	0.0659882	9.31907	3.31494e-17	2.40174e-14	3.31494e-17	0.001	0.000358658
chr1:45457140_rs659293	EIF2B3	0.153473	9.31388	3.4276e-17	2.0295e-14	3.4276e-17	0.001	0.000358658
chr2:233583050_rs6746294	GIGYF2	-0.0692001	-9.31268	3.45401e-17	1.96543e-14	3.45401e-17	0.001	0.000358658
chr16:57444563_rs223898	CCL17	-0.317238	-9.30165	3.70817e-17	2.74495e-14	3.70817e-17	0.001	0.000358658
chr3:196350841_rs6799977	LRRC33	-0.147619	-9.2935	3.90744e-17	2.81189e-14	3.90744e-17	0.001	0.000358658
chr8:97825208_rs10955084	SDC2	-0.199919	-9.29171	3.95278e-17	3.22107e-14	3.95278e-17	0.001	0.000358658
chr4:169293829_rs28520722	DDX60L	0.191642	9.28097	4.23526e-17	2.44468e-14	4.23526e-17	0.001	0.000358658
chr20:62887012_rs60461814	PCMTD2	0.216718	9.2687	4.58272e-17	3.05521e-14	4.58272e-17	0.001	0.000358658
chr6:129812585_rs2784907	LAMA2	0.246462	9.26304	4.75209e-17	1.46559e-14	4.75209e-17	0.001	0.000358658
chr12:14694877_rs1862013	PLBD1	0.233411	9.24847	5.2182e-17	3.53348e-14	5.2182e-17	0.001	0.000358658
chr14:20881527_rs1713434	TEP1	0.0938211	9.23864	5.55805e-17	4.43122e-14	5.55805e-17	0.001	0.000358658
chr2:216609984_rs1533880	FN1	0.771939	9.23839	5.56674e-17	3.11048e-14	5.56674e-17	0.001	0.000358658
chr14:72010998_rs61989417	SIPA1L1	-0.226614	-9.23605	5.65107e-17	4.49823e-14	5.65107e-17	0.001	0.000358658
chr2:242770637_rs7370514	NEU4	1.59068	9.23417	5.71965e-17	3.19012e-14	5.71965e-17	0.001	0.000358658
chr17:78076592_rs12450199	GAA	0.200819	9.23372	5.73622e-17	3.1943e-14	5.73622e-17	0.001	0.000358658
chr2:198902909_rs10497811	PLCL1	0.198677	9.22846	5.93291e-17	3.29758e-14	5.93291e-17	0.001	0.000358658
chr9:110589451_rs10123607	KLF4	0.166726	9.22051	6.24337e-17	4.12027e-14	6.24337e-17	0.001	0.000358658
chr10:97463471_rs55801606	TCTN3	-0.20054	-9.21565	6.44066e-17	2.91416e-14	6.44066e-17	0.001	0.000358658
chr11:60635711_rs544860	TMEM109	-0.106067	-9.21562	6.44214e-17	4.69716e-14	6.44214e-17	0.001	0.000358658
chr5:102201590_rs249496	PAM	0.290413	9.21522	6.45854e-17	3.19995e-14	6.45854e-17	0.001	0.000358658
chr3:32450413_rs347126	CMTM7	-0.110057	-9.21372	6.52102e-17	4.60047e-14	6.52102e-17	0.001	0.000358658
chr2:42329329_rs7570219	EML4	-0.146179	-9.20924	6.71088e-17	3.70484e-14	6.71088e-17	0.001	0.000358658
chr1:45476663_rs2298005	UROD	0.151449	9.20747	6.78733e-17	3.91735e-14	6.78733e-17	0.001	0.000358658
chr12:49673551_rs6580706	TUBA1C	0.133465	9.2069	6.81213e-17	4.56532e-14	6.81213e-17	0.001	0.000358658
chr15:59984519_rs56141740	BNIP2	0.0577005	9.20474	6.90712e-17	3.48203e-14	6.90712e-17	0.001	0.000358658
chr7:151049818_rs444648	NUB1	0.0832665	9.19924	7.15489e-17	3.41351e-14	7.15489e-17	0.001	0.000358658
chr19:18699445_rs10407212	UBA52	0.0604453	9.19635	7.28857e-17	1.05463e-13	7.28857e-17	0.001	0.000358658
chr2:48641162_rs78103086	PPP1R21	-0.174248	-9.18013	8.08641e-17	4.4284e-14	8.08641e-17	0.001	0.000358658
chr10:126431711_rs34884690	METTL10	0.200377	9.17847	8.1725e-17	3.64879e-14	8.1725e-17	0.001	0.000358658
chr16:3590600_rs1609847	SLX4	-0.150697	-9.17024	8.61464e-17	6.07274e-14	8.61464e-17	0.001	0.000358658
chr15:64383029_rs332261	FAM96A	0.0935126	9.15818	9.30522e-17	4.59207e-14	9.30522e-17	0.001	0.000358658
chr3:46258902_rs2201150	CCR1	0.15487	9.15542	9.47103e-17	6.60004e-14	9.47103e-17	0.001	0.000358658
chr10:71107973_rs10823348	HK1	0.1027	9.15095	9.746e-17	4.31482e-14	9.746e-17	0.001	0.000358658
chr5:149379897_rs6579765	TIGD6	0.271063	9.14881	9.87974e-17	4.8108e-14	9.87974e-17	0.001	0.000358658
chr5:1606844_rs116563943	LOC728613	0.628218	9.14846	9.90207e-17	4.82078e-14	9.90207e-17	0.001	0.000358658
chr17:44990046_rs197913	GOSR2	-0.086555	-9.13773	1.06053e-16	5.78109e-14	1.06053e-16	0.001	0.000358658
chr7:43804695_rs1181574	COA1	0.142475	9.12921	1.11984e-16	5.2846e-14	1.11984e-16	0.001	0.000358658
chr9:34333855_rs11788425	KIAA1161	-0.28109	-9.12806	1.12809e-16	7.1681e-14	1.12809e-16	0.001	0.000358658
chr4:100065509_rs1800759	ADH5	0.142656	9.12431	1.15542e-16	6.44564e-14	1.15542e-16	0.001	0.000358658
chr14:35516213_rs799473	FAM177A1	0.0718289	9.12276	1.16697e-16	8.93133e-14	1.16697e-16	0.001	0.000358658
chr5:76778146_rs2169139	WDR41	0.260976	9.11122	1.25617e-16	6.08037e-14	1.25617e-16	0.001	0.000358658
chr11:111471392_rs542831	SIK2	0.108898	9.10693	1.29103e-16	8.98744e-14	1.29103e-16	0.001	0.000358658
chr17:27463118_rs72817632	MYO18A	0.128597	9.10126	1.33861e-16	7.21845e-14	1.33861e-16	0.001	0.000358658
chr1:151131091_rs41305062	TNFAIP8L2-SCNM1	-0.0918624	-9.09767	1.36962e-16	7.69076e-14	1.36962e-16	0.001	0.000358658
chr1:151653312_rs6687866	SNX27	-0.0858481	-9.09684	1.37693e-16	7.73023e-14	1.37693e-16	0.001	0.000358658
chr20:17629162_rs6080761	DSTN	-0.097518	-9.09634	1.3813e-16	8.7409e-14	1.3813e-16	0.001	0.000358658
chr2:136688749_rs309161	DARS	-0.103843	-9.09375	1.40429e-16	7.54683e-14	1.40429e-16	0.001	0.000358658
chr19:58376008_rs10402633	ZNF814	0.145557	9.091	1.42912e-16	1.98674e-13	1.42912e-16	0.001	0.000358658
chr1:26616280_rs3924324	CD52	0.423335	9.08598	1.47563e-16	8.26003e-14	1.47563e-16	0.001	0.000358658
chr3:112330056_rs11489073	SLC35A5	0.10652	9.08311	1.50293e-16	1.03226e-13	1.50293e-16	0.001	0.000358658
chr17:6914340_rs11571353	RNASEK-C17orf49	0.104346	9.08157	1.51777e-16	8.13022e-14	1.51777e-16	0.001	0.000358658
chr13:38926390_rs2485788	UFM1	-0.128459	-9.07003	1.63365e-16	1.56282e-13	1.63365e-16	0.001	0.000358658
chr17:73154059_rs11653714	SUMO2	-0.0493863	-9.064	1.69758e-16	9.04361e-14	1.69758e-16	0.001	0.000358658
chr18:59820762_rs1472803	PIGN	0.110996	9.06085	1.73204e-16	1.87341e-13	1.73204e-16	0.001	0.000358658
chr12:9810000_rs17805558	CLEC2D	-0.319663	-9.05953	1.74659e-16	1.11131e-13	1.74659e-16	0.001	0.000358658
chr2:3322555_rs62121538	TRAPPC12	-0.146888	-9.05735	1.77103e-16	9.41196e-14	1.77103e-16	0.001	0.000358658
chr19:12768391_rs73002392	MAN2B1	-0.0993403	-9.05569	1.78984e-16	2.46379e-13	1.78984e-16	0.001	0.000358658
chr15:45883635_rs1966763	BLOC1S6	-0.128548	-9.04809	1.87868e-16	8.92574e-14	1.87868e-16	0.001	0.000358658
chr1:158233651_rs440710	CD1E	-0.242508	-9.04629	1.90026e-16	1.05029e-13	1.90026e-16	0.001	0.000358658
chr11:118068752_rs2298831	AMICA1	-0.24933	-9.04312	1.93903e-16	1.32687e-13	1.93903e-16	0.001	0.000358658
chr22:28315257_rs2235574	PITPNB	-0.12506	-9.04025	1.97473e-16	1.67241e-13	1.97473e-16	0.001	0.000358658
chr8:134910447_rs112485213	ST3GAL1	0.192277	9.03866	1.99487e-16	1.47791e-13	1.99487e-16	0.001	0.000358658
chr19:54709443_rs17207321	LILRB3	0.318774	9.03746	2.01017e-16	2.75396e-13	2.01017e-16	0.001	0.000358658
chr17:79266355_rs78635201	SLC38A10	-0.127999	-9.03512	2.04036e-16	1.07949e-13	2.04036e-16	0.001	0.000358658
chr11:108027060_rs10890822	ATM	-0.113368	-9.02994	2.10876e-16	1.43995e-13	2.10876e-16	0.001	0.000358658
chr4:141291073_rs7657290	SCOC	0.208438	9.02372	2.19377e-16	1.193e-13	2.19377e-16	0.001	0.000358658
chr5:137406410_rs191830974	FAM13B	-0.125502	-9.02219	2.21526e-16	1.06123e-13	2.21526e-16	0.001	0.000358658
chr2:120024503_rs6721852	STEAP3	0.310286	9.02089	2.23373e-16	1.17641e-13	2.23373e-16	0.001	0.000358658
chr11:77600361_rs113671826	AAMDC	0.243674	9.0187	2.26503e-16	1.5372e-13	2.26503e-16	0.001	0.000358658
chr6:38662470_rs1781717	GLO1	0.0892894	9.01778	2.27825e-16	6.60356e-14	2.27825e-16	0.001	0.000358658
chr4:164446283_rs1053209	2018-03-01	1899-12-29 21:10:26	-9.01505	2.31818e-16	1.25788e-13	2.31818e-16	0.001	0.000358658
chr9:88714489_rs191559811	GOLM1	-0.422302	-9.01448	2.32666e-16	1.40777e-13	2.32666e-16	0.001	0.000358658
chr5:178097220_rs6898037	CLK4	0.146489	9.00878	2.41247e-16	1.1502e-13	2.41247e-16	0.001	0.000358658
chr22:39044536_rs7291287	JOSD1	0.0850654	9.00559	2.46196e-16	2.07551e-13	2.46196e-16	0.001	0.000358658
chr7:99797792_rs13230744	STAG3	0.261971	9.00292	2.50404e-16	1.15088e-13	2.50404e-16	0.001	0.000358658
chr12:113376388_rs1859330	OAS2	0.140734	9.00268	2.50788e-16	1.57695e-13	2.50788e-16	0.001	0.000358658
chr14:50094913_rs2985696	NEMF	-0.0721896	-8.99418	2.64699e-16	1.93865e-13	2.64699e-16	0.001	0.000358658
chr18:32926521_rs9956732	ZNF24	-0.0903944	-8.99407	2.64885e-16	2.76748e-13	2.64885e-16	0.001	0.000358658
chr3:33152154_rs55737965	CRTAP	-0.13771	-8.98755	2.76081e-16	1.8614e-13	2.76081e-16	0.001	0.000358658
chr11:66216815_rs1700184	PELI3	-1.01723	-8.98686	2.77296e-16	1.86733e-13	2.77296e-16	0.001	0.000358658
chr12:42861370_rs7134130	PPHLN1	-0.0773574	-8.98438	2.81707e-16	1.76154e-13	2.81707e-16	0.001	0.000358658
chr5:74081943_rs12187244	GFM2	-0.1508	-8.9824	2.85264e-16	1.35534e-13	2.85264e-16	0.001	0.000358658
chr15:62944448_rs10775179	TLN2	-0.466014	-8.98134	2.87186e-16	1.34271e-13	2.87186e-16	0.001	0.000358658
chr14:21976761_rs9322989	METTL3	-0.144958	-8.97409	3.00731e-16	2.18897e-13	3.00731e-16	0.001	0.000358658
chr5:134454689_rs574654	PITX1	0.394593	8.97352	3.01814e-16	1.42954e-13	3.01814e-16	0.001	0.000358658
chr2:9547171_rs10929579	ITGB1BP1	-0.114219	-8.96567	3.17231e-16	1.65091e-13	3.17231e-16	0.001	0.000358658
chr10:82279070_rs1052631	TSPAN14	0.244609	8.96	3.28842e-16	1.3396e-13	3.28842e-16	0.001	0.000358658
chr7:120987350_rs2707461	FAM3C	0.16213	8.95543	3.38517e-16	1.53145e-13	3.38517e-16	0.001	0.000358658
chr15:60756599_rs35445274	ANXA2	0.131591	8.95266	3.44516e-16	1.59983e-13	3.44516e-16	0.001	0.000358658
chr22:46994185_rs55653930	GRAMD4	-0.255245	-8.93725	3.79876e-16	3.14497e-13	3.79876e-16	0.001	0.000358658
chr19:36038390_rs7599	TMEM147	-0.137064	-8.93111	3.94952e-16	5.14933e-13	3.94952e-16	0.001	0.000358658
chr19:47337291_rs80287144	SLC1A5	-0.328067	-8.92846	4.01646e-16	5.23244e-13	4.01646e-16	0.001	0.000358658
chr3:171858523_rs6445040	FNDC3B	0.0858795	8.92368	4.14001e-16	2.73869e-13	4.14001e-16	0.001	0.000358658
chr8:8824207_rs144711521	MFHAS1	-0.211879	-8.91585	4.35043e-16	3.0789e-13	4.35043e-16	0.001	0.000358658
chr7:150786061_rs11769922	AGAP3	-0.101676	-8.91275	4.43655e-16	1.987e-13	4.43655e-16	0.001	0.000358658
chr9:117090434_rs3762056	ORM1	-3.39744	-8.91207	4.4557e-16	2.57926e-13	4.4557e-16	0.001	0.000358658
chr10:5000917_rs76216796	AKR1C1	-2.11813	-8.91176	4.46444e-16	1.77577e-13	4.46444e-16	0.001	0.000358658
chr12:9127502_rs11048358	M6PR	-0.0829086	-8.91098	4.48679e-16	2.74486e-13	4.48679e-16	0.001	0.000358658
chr19:18698019_rs4808823	C19orf60	0.217149	8.8963	4.92362e-16	6.34519e-13	4.92362e-16	0.001	0.000358658
chr20:25012178_rs62217177	CST7	0.350988	8.88049	5.44113e-16	3.30022e-13	5.44113e-16	0.001	0.000358658
chr19:41903699_rs45500792	TMEM91	0.531001	8.87829	5.51745e-16	7.07702e-13	5.51745e-16	0.001	0.000358658
chr2:45771974_rs66854896	SRBD1	-0.101904	-8.875	5.63345e-16	2.84844e-13	5.63345e-16	0.001	0.000358658
chr3:160532306_rs13068380	PPM1L	-0.188529	-8.87179	5.74906e-16	3.76491e-13	5.74906e-16	0.001	0.000358658
chr19:54603400_rs10410214	OSCAR	0.207227	8.87084	5.78363e-16	7.40877e-13	5.78363e-16	0.001	0.000358658
chr3:184550501_rs9830734	VPS8	-0.107942	-8.86292	6.08041e-16	3.97133e-13	6.08041e-16	0.001	0.000358658
chr5:6643662_rs248806	SRD5A1	-0.130071	-8.86071	6.16587e-16	2.84742e-13	6.16587e-16	0.001	0.000358658
chr13:51469798_rs9568490	RNASEH2B	0.127446	8.85649	6.33244e-16	5.7978e-13	6.33244e-16	0.001	0.000358658
chr17:4685228_rs34460487	BC150535	-1.33775	-8.84954	6.61648e-16	3.32808e-13	6.61648e-16	0.001	0.000358658
chr4:140589767_rs72728776	MGST2	-0.243393	-8.84782	6.68863e-16	3.47391e-13	6.68863e-16	0.001	0.000358658
chr8:16050979_rs10101049	MSR1	0.98831	8.84415	6.84568e-16	4.68684e-13	6.84568e-16	0.001	0.000358658
chr1:192529414_rs2760522	RGS1	0.338804	8.84181	6.94726e-16	3.6426e-13	6.94726e-16	0.001	0.000358658
chr15:42468786_rs1679008	VPS39	-0.0952799	-8.8336	7.31692e-16	3.26181e-13	7.31692e-16	0.001	0.000358658
chr5:79432305_rs4703801	SERINC5	-0.15991	-8.83068	7.4532e-16	3.41286e-13	7.4532e-16	0.001	0.000358658
chr3:112646699_rs7432373	CD200R1	-0.230805	-8.8233	7.80799e-16	5.01358e-13	7.80799e-16	0.001	0.000358658
chr9:139305041_rs4400499	SDCCAG3	0.188716	8.82146	7.89946e-16	4.46571e-13	7.89946e-16	0.001	0.000358658
chr2:190505813_rs16831821	ORMDL1	-0.212564	-8.81874	8.03586e-16	3.96312e-13	8.03586e-16	0.001	0.000358658
chr6:44028307_rs10948120	VEGFA	0.249122	8.81673	8.1385e-16	2.24685e-13	8.1385e-16	0.001	0.000358658
chr2:167249381_rs55896121	SCN9A	0.327302	8.81381	8.28959e-16	4.07952e-13	8.28959e-16	0.001	0.000358658
chr2:120133659_rs6745591	DBI	0.0971854	8.81267	8.34968e-16	4.10854e-13	8.34968e-16	0.001	0.000358658
chr11:104868661_rs545744	CASP4	0.0605926	8.81109	8.43299e-16	5.38458e-13	8.43299e-16	0.001	0.000358658
chr18:9219662_rs998171	NDUFV2	0.0941277	8.80651	8.67995e-16	8.14428e-13	8.67995e-16	0.001	0.000358658
chr5:171643798_rs12652736	UBTD2	-0.188958	-8.80651	8.67996e-16	3.9572e-13	8.67996e-16	0.001	0.000358658
chr10:69659597_rs34097879	SIRT1	0.185814	8.7959	9.27997e-16	3.57976e-13	9.27997e-16	0.001	0.000358658
chr7:28724502_rs6965754	CREB5	-0.189415	-8.79567	9.29348e-16	4.006e-13	9.29348e-16	0.001	0.000358658
chr6:31346898_rs113717181	HLA-B	0.35807	8.79458	9.35781e-16	2.56824e-13	9.35781e-16	0.001	0.000358658
chr8:74914245_rs79526090	LY96	0.19663	8.79301	9.45042e-16	6.25408e-13	9.45042e-16	0.001	0.000358658
chr7:50855620_rs4947888	GRB10	0.258278	8.78495	9.94287e-16	4.27442e-13	9.94287e-16	0.001	0.000358658
chr9:33018423_rs7043066	SMU1	0.0703873	8.78402	1.00011e-15	5.56588e-13	1.00011e-15	0.001	0.000358658
chr9:100881525_rs2761063	TRIM14	0.148205	8.77938	1.02975e-15	5.72818e-13	1.02975e-15	0.001	0.000358658
chr16:2011126_rs758335	TCRBV20S1	0.0927077	8.77803	1.03852e-15	6.2636e-13	1.03852e-15	0.001	0.000358658
chr6:166759622_rs2343590	SFT2D1	-0.0880767	-8.77627	1.05012e-15	2.87083e-13	1.05012e-15	0.001	0.000358658
chr3:58376639_rs4390943	PDHB	-0.0918219	-8.77509	1.05793e-15	6.72416e-13	1.05793e-15	0.001	0.000358658
chr11:833262_rs61876748	POLR2L	0.126662	8.7696	1.09515e-15	6.90628e-13	1.09515e-15	0.001	0.000358658
chr5:135401678_rs17169786	TGFBI	-0.168514	-8.75458	1.20362e-15	5.44253e-13	1.20362e-15	0.001	0.000358658
chr1:203503267_rs13303121	ATP2B4	0.39958	8.75221	1.2217e-15	6.29579e-13	1.2217e-15	0.001	0.000358658
chr15:99782595_rs12911898	TTC23	0.2926	8.74882	1.24806e-15	5.34587e-13	1.24806e-15	0.001	0.000358658
chr14:23042478_rs146684163	DAD1	-0.126434	-8.74439	1.28324e-15	8.78621e-13	1.28324e-15	0.001	0.000358658
chr1:93663604_rs35940311	DR1	0.0772408	8.74253	1.29834e-15	6.67984e-13	1.29834e-15	0.001	0.000358658
chr3:48682658_rs34638686	CELSR3	-0.175953	-8.74059	1.31426e-15	8.2907e-13	1.31426e-15	0.001	0.000358658
chr1:9170817_rs770029	GPR157	0.285306	8.73755	1.33963e-15	6.88892e-13	1.33963e-15	0.001	0.000358658
chr4:6919832_rs10937763	TBC1D14	-0.110793	-8.73721	1.34248e-15	6.71878e-13	1.34248e-15	0.001	0.000358658
chr19:19743730_rs8113682	LPAR2	-0.211439	-8.73613	1.35167e-15	1.63949e-12	1.35167e-15	0.001	0.000358658
chr2:47155250_rs2117167	TTC7A	-0.113461	-8.72291	1.46864e-15	6.95269e-13	1.46864e-15	0.001	0.000358658
chr16:50109478_rs12931497	HEATR3	-0.123071	-8.72224	1.47483e-15	8.66025e-13	1.47483e-15	0.001	0.000358658
chr5:66507302_rs11741266	CD180	0.431512	8.72208	1.47632e-15	6.61587e-13	1.47632e-15	0.001	0.000358658
chr8:145031968_rs55831924	PLEC	0.100839	8.71833	1.51145e-15	9.63262e-13	1.51145e-15	0.001	0.000358658
chr7:148948159_rs75518757	LOC155060	0.203054	8.70967	1.59595e-15	6.68524e-13	1.59595e-15	0.001	0.000358658
chr6:32821447_rs2071536	PSMB8	0.192902	8.70276	1.6666e-15	4.48603e-13	1.6666e-15	0.001	0.000358658
chr11:437781_rs56240062	RNH1	-0.12407	-8.7027	1.66728e-15	1.03679e-12	1.66728e-15	0.001	0.000358658
chr16:66927634_rs8060841	NAE1	0.213367	8.70134	1.68148e-15	9.79663e-13	1.68148e-15	0.001	0.000358658
chr1:226056913_rs360087	TMEM63A	-0.132005	-8.70022	1.69335e-15	8.63405e-13	1.69335e-15	0.001	0.000358658
chr6:33740382_rs2296744	LEMD2	0.0954761	8.69899	1.7065e-15	4.5893e-13	1.7065e-15	0.001	0.000358658
chr3:51522676_rs62257549	RAD54L2	-0.140208	-8.69774	1.71998e-15	1.0765e-12	1.71998e-15	0.001	0.000358658
chr13:41619587_rs7982279	WBP4	0.111119	8.69659	1.73241e-15	1.52199e-12	1.73241e-15	0.001	0.000358658
chr11:129911847_rs112914324	APLP2	-0.243062	-8.69456	1.7546e-15	1.08836e-12	1.7546e-15	0.001	0.000358658
chr1:36185467_rs72659664	C1orf216	0.170306	8.69306	1.77121e-15	9.00701e-13	1.77121e-15	0.001	0.000358658
chr13:27998769_rs1049302	GTF3A	-0.115771	-8.69299	1.77192e-15	1.55321e-12	1.77192e-15	0.001	0.000358658
chr19:17622614_rs11086075	PGLS	0.0952271	8.68619	1.84916e-15	2.21015e-12	1.84916e-15	0.001	0.000358658
chr12:110894557_rs11065647	VPS29	0.063257	8.68559	1.85602e-15	1.06454e-12	1.85602e-15	0.001	0.000358658
chr15:65072461_rs2414856	TRIP4	0.100525	8.6849	1.8641e-15	7.85899e-13	1.8641e-15	0.001	0.000358658
chr16:85042716_rs73258117	ZDHHC7	0.157736	8.684	1.87469e-15	1.08531e-12	1.87469e-15	0.001	0.000358658
chr5:171836255_rs57363492	SH3PXD2B	-0.211613	-8.67856	1.93966e-15	8.60048e-13	1.93966e-15	0.001	0.000358658
chr19:10222195_rs12460842	ANGPTL6	-0.319589	-8.66991	2.04769e-15	2.44089e-12	2.04769e-15	0.001	0.000358658
chr13:111184256_rs2025905	RAB20	0.20541	8.66945	2.05366e-15	1.7789e-12	2.05366e-15	0.001	0.000358658
chr2:70209201_rs139423032	PCBP1-AS1	0.786646	8.6684	2.0671e-15	9.59239e-13	2.0671e-15	0.001	0.000358658
chr5:1104938_rs35188965	SLC12A7	0.19943	8.66765	2.07687e-15	9.17759e-13	2.07687e-15	0.001	0.000358658
chr6:18174012_rs7754932	KDM1B	-0.131974	-8.65901	2.19236e-15	5.83419e-13	2.19236e-15	0.001	0.000358658
chr15:34717611_rs7164465	GOLGA8A	0.37103	8.65841	2.20055e-15	9.2123e-13	2.20055e-15	0.001	0.000358658
chr12:42743598_rs4359266	ZCRB1	-0.103754	-8.6581	2.20481e-15	1.25854e-12	2.20481e-15	0.001	0.000358658
chr1:12220760_rs7545382	TNFRSF1B	-0.230806	-8.65619	2.23135e-15	1.12232e-12	2.23135e-15	0.001	0.000358658
chr20:23369354_rs2424530	GZF1	-0.168731	-8.6525	2.28346e-15	1.29504e-12	2.28346e-15	0.001	0.000358658
chr2:44143756_rs6759659	LRPPRC	-0.0790297	-8.65067	2.30987e-15	1.06639e-12	2.30987e-15	0.001	0.000358658
chr14:104111794_rs4906350	KLC1	-0.0693174	-8.65051	2.31217e-15	1.54826e-12	2.31217e-15	0.001	0.000358658
chr1:15480493_rs7530300	TMEM51	-0.18464	-8.64606	2.37736e-15	1.1933e-12	2.37736e-15	0.001	0.000358658
chr4:140107280_rs76497873	ELF2	0.102334	8.64144	2.44709e-15	1.17411e-12	2.44709e-15	0.001	0.000358658
chr1:110193645_rs11101980	GSTM4	0.341006	8.63692	2.51733e-15	1.25969e-12	2.51733e-15	0.001	0.000358658
chr14:102871366_rs72698598	TECPR2	-0.303745	-8.63615	2.52942e-15	1.68923e-12	2.52942e-15	0.001	0.000358658
chr19:16355566_rs12986391	AP1M1	-0.0665224	-8.63388	2.56563e-15	3.01798e-12	2.56563e-15	0.001	0.000358658
chr17:79971065_rs4995642	STRA13	-0.168336	-8.63133	2.60684e-15	1.22255e-12	2.60684e-15	0.001	0.000358658
chr17:80569840_rs67873985	WDR45B	-0.0759832	-8.63073	2.61663e-15	1.22627e-12	2.61663e-15	0.001	0.000358658
chr19:10674558_rs10412541	KRI1	-0.154675	-8.62546	2.70434e-15	3.17354e-12	2.70434e-15	0.001	0.000358658
chr6:24692179_rs1885211	ACOT13	-0.155774	-8.62332	2.74065e-15	7.23417e-13	2.74065e-15	0.001	0.000358658
chr19:52255196_rs4802859	FPR2	-0.260949	-8.62323	2.74219e-15	3.21411e-12	2.74219e-15	0.001	0.000358658
chr6:26387546_rs9358938	BTN3A1	0.160197	8.62252	2.75447e-15	7.26961e-13	2.75447e-15	0.001	0.000358658
chr20:2894790_rs619450	PTPRA	0.0510539	8.62182	2.76657e-15	1.56087e-12	2.76657e-15	0.001	0.000358658
chr16:53474108_rs9927982	RBL2	-0.0873447	-8.62018	2.79505e-15	1.57635e-12	2.79505e-15	0.001	0.000358658
chr9:131212831_rs7849384	SPTAN1	-0.102045	-8.61623	2.86491e-15	1.51313e-12	2.86491e-15	0.001	0.000358658
chr2:86795038_rs10432704	CHMP3	-0.059524	-8.61523	2.8829e-15	1.31561e-12	2.8829e-15	0.001	0.000358658
chr2:11323276_rs978906	ROCK2	-0.0730775	-8.61276	2.92772e-15	1.33508e-12	2.92772e-15	0.001	0.000358658
chr12:104260208_rs11612613	HSP90B1	-0.134869	-8.60791	3.01774e-15	1.68929e-12	3.01774e-15	0.001	0.000358658
chr7:140406499_rs2968548	NDUFB2	0.104444	8.60423	3.08783e-15	1.24544e-12	3.08783e-15	0.001	0.000358658
chr4:56071800_rs66764663	SRD5A3	-0.309476	-8.60226	3.126e-15	1.47711e-12	3.126e-15	0.001	0.000358658
chr19:36150764_rs12986089	COX6B1	0.0638173	8.59975	3.17551e-15	3.69379e-12	3.17551e-15	0.001	0.000358658
chr2:231034785_rs7590861	SP110	0.0567097	8.59879	3.19459e-15	1.44995e-12	3.19459e-15	0.001	0.000358658
chr17:34960336_rs35712149	DHRS11	0.228617	8.59807	3.20882e-15	1.49175e-12	3.20882e-15	0.001	0.000358658
chr18:9610640_rs610872	PPP4R1	-0.0860227	-8.59798	3.21063e-15	2.63157e-12	3.21063e-15	0.001	0.000358658
chr3:52567014_rs12489828	NT5DC2	0.234731	8.59573	3.25619e-15	1.97306e-12	3.25619e-15	0.001	0.000358658
chr12:120898738_rs526176	GATC	-0.165185	-8.59124	3.34857e-15	1.86852e-12	3.34857e-15	0.001	0.000358658
chr19:4655863_rs2003489	C19orf10	0.154985	8.58812	3.41451e-15	3.96147e-12	3.41451e-15	0.001	0.000358658
chr10:5008383_rs7908994	AKR1C3	-0.885256	-8.5861	3.45786e-15	1.2348e-12	3.45786e-15	0.001	0.000358658
chr1:39529720_rs12036597	AKIRIN1	0.0777625	8.58503	3.48096e-15	1.71552e-12	3.48096e-15	0.001	0.000358658
chr9:135663521_rs215156	AK8	0.446351	8.57086	3.80251e-15	1.97821e-12	3.80251e-15	0.001	0.000358658
chr13:25849146_rs12430251	MTMR6	-0.140507	-8.5685	3.85882e-15	3.26301e-12	3.85882e-15	0.001	0.000358658
chr13:113927208_rs9604045	LAMP1	-0.336735	-8.56648	3.90791e-15	3.29977e-12	3.90791e-15	0.001	0.000358658
chr17:35899141_rs1034686	SYNRG	-0.0773908	-8.56569	3.92707e-15	1.80937e-12	3.92707e-15	0.001	0.000358658
chr16:1515415_rs12927645	CLCN7	0.188815	8.56376	3.97468e-15	2.19481e-12	3.97468e-15	0.001	0.000358658
chr12:97176077_rs34464	NEDD1	0.133182	8.55978	4.07452e-15	2.24034e-12	4.07452e-15	0.001	0.000358658
chr20:18477614_rs2247746	LINC00493	0.160156	8.5591	4.09187e-15	2.25602e-12	4.09187e-15	0.001	0.000358658
chr4:120133892_rs6833072	USP53	-0.215075	-8.55879	4.09966e-15	1.90824e-12	4.09966e-15	0.001	0.000358658
chr17:4852463_rs4790714	PFN1	0.0495963	8.5578	4.125e-15	1.89634e-12	4.125e-15	0.001	0.000358658
chr1:159049468_rs55719948	AIM2	0.238471	8.55517	4.19328e-15	2.04883e-12	4.19328e-15	0.001	0.000358658
chr4:144158285_rs1440411	USP38	-0.0826247	-8.5536	4.2344e-15	1.96777e-12	4.2344e-15	0.001	0.000358658
chr5:141400714_rs60654272	GNPDA1	-0.265526	-8.55148	4.29069e-15	1.85665e-12	4.29069e-15	0.001	0.000358658
chr2:170538780_rs72625207	FASTKD1	-0.236334	-8.55079	4.30921e-15	1.92737e-12	4.30921e-15	0.001	0.000358658
chr17:76148833_rs73375767	SYNGR2	-0.0851897	-8.54898	4.35789e-15	1.99894e-12	4.35789e-15	0.001	0.000358658
chr19:50426808_rs1152234	ATF5	0.1471	8.54626	4.43246e-15	5.07176e-12	4.43246e-15	0.001	0.000358658
chr16:67027999_rs4783748	CBFB	0.136572	8.5416	4.56304e-15	2.47613e-12	4.56304e-15	0.001	0.000358658
chr14:65542607_rs1957949	MAX	0.0679862	8.52844	4.95252e-15	3.20819e-12	4.95252e-15	0.001	0.000358658
chr17:74554739_rs4648343	SNHG16	-0.187014	-8.52226	5.14634e-15	2.34469e-12	5.14634e-15	0.001	0.000358658
chr7:150755173_rs2069443	SLC4A2	0.0726696	8.52168	5.16523e-15	2.03505e-12	5.16523e-15	0.001	0.000358658
chr3:41867613_rs143471145	TRAK1	0.206894	8.51983	5.22494e-15	3.1042e-12	5.22494e-15	0.001	0.000358658
chr5:147208043_rs6580502	SPINK1	1.29284	8.51467	5.3953e-15	2.30968e-12	5.3953e-15	0.001	0.000358658
chr6:159182358_rs13216467	EZR	-0.0769266	-8.51425	5.40941e-15	1.38979e-12	5.40941e-15	0.001	0.000358658
chr3:44762830_rs56084453	ZNF197	-0.209316	-8.511	5.5197e-15	3.2702e-12	5.5197e-15	0.001	0.000358658
chr18:33729563_rs78744115	MOCOS	0.257432	8.50468	5.74097e-15	4.5437e-12	5.74097e-15	0.001	0.000358658
chr1:213041025_rs17019818	FLVCR1	-0.231193	-8.5016	5.85181e-15	2.81851e-12	5.85181e-15	0.001	0.000358658
chr20:4800037_rs2423046	RASSF2	0.181497	8.4996	5.92504e-15	3.22663e-12	5.92504e-15	0.001	0.000358658
chr9:132589606_rs8113	C9orf78	-0.097348	-8.49484	6.10282e-15	3.08898e-12	6.10282e-15	0.001	0.000358658
chr12:67837347_rs11176738	DYRK2	-0.156514	-8.49434	6.12193e-15	3.29293e-12	6.12193e-15	0.001	0.000358658
chr10:126464649_rs112140735	FAM175B	-0.0875927	-8.48459	6.50368e-15	2.24742e-12	6.50368e-15	0.001	0.000358658
chr2:224893921_rs12476888	SERPINE2	0.311741	8.4824	6.59287e-15	2.88333e-12	6.59287e-15	0.001	0.000358658
chr21:37538063_rs9984678	CBR3	-0.34064	-8.47977	6.70136e-15	4.87974e-12	6.70136e-15	0.001	0.000358658
chr17:44571543_rs150901855	ARL17A	0.69057	8.47975	6.70221e-15	3.02521e-12	6.70221e-15	0.001	0.000358658
chr15:91009484_rs2074585	IQGAP1	-0.058762	-8.47616	6.85323e-15	2.73821e-12	6.85323e-15	0.001	0.000358658
chr2:113277217_rs62157534	TTL	0.113818	8.4757	6.87303e-15	2.99838e-12	6.87303e-15	0.001	0.000358658
chr1:183558174_rs12094036	NCF2	-0.134079	-8.47472	6.91456e-15	3.29919e-12	6.91456e-15	0.001	0.000358658
chr9:131790531_rs11537529	SH3GLB2	0.13568	8.4716	7.04975e-15	3.53465e-12	7.04975e-15	0.001	0.000358658
chr20:10427011_rs6104612	MKKS	0.10509	8.47095	7.07859e-15	3.82875e-12	7.07859e-15	0.001	0.000358658
chr6:160193853_rs7759086	MRPL18	0.0964302	8.46981	7.12878e-15	1.81101e-12	7.12878e-15	0.001	0.000358658
chr12:104345957_rs2722191	C12orf73	-0.33479	-8.46695	7.25623e-15	3.8432e-12	7.25623e-15	0.001	0.000358658
chr11:68038870_rs79666127	C11orf24	-0.405327	-8.46652	7.27564e-15	4.03307e-12	7.27564e-15	0.001	0.000358658
chr18:54271371_rs11151970	TXNL1	0.0859549	8.46338	7.41883e-15	5.77578e-12	7.41883e-15	0.001	0.000358658
chr18:12303726_rs12965912	TUBB6	-0.135248	-8.46266	7.45172e-15	5.78819e-12	7.45172e-15	0.001	0.000358658
chr3:119024379_rs7623525	ARHGAP31	0.0945677	8.46181	7.49132e-15	4.39108e-12	7.49132e-15	0.001	0.000358658
chr2:40690454_rs35372921	SLC8A1	0.187082	8.45992	7.57973e-15	3.28955e-12	7.57973e-15	0.001	0.000358658
chr16:2734773_rs144134427	KCTD5	0.20301	8.45573	7.7789e-15	4.0847e-12	7.7789e-15	0.001	0.000358658
chr19:54612628_rs254262	NDUFA3	0.132257	8.45314	7.9051e-15	8.77525e-12	7.9051e-15	0.001	0.000358658
chr3:149455651_rs951300	COMMD2	-0.0875963	-8.44808	8.15698e-15	4.76813e-12	8.15698e-15	0.001	0.000358658
chr17:4866304_rs117308739	CAMTA2	-0.124286	-8.43829	8.6669e-15	3.88129e-12	8.6669e-15	0.001	0.000358658
chr11:64004643_rs12294913	VEGFB	-0.486747	-8.43741	8.71425e-15	4.77538e-12	8.71425e-15	0.001	0.000358658
chr2:10957848_rs12474895	PDIA6	-0.103645	-8.43621	8.77901e-15	3.78639e-12	8.77901e-15	0.001	0.000358658
chr14:67812631_rs2274336	ATP6V1D	-0.123188	-8.42605	9.34934e-15	5.86526e-12	9.34934e-15	0.001	0.000358658
chr8:120616371_rs10097368	ENPP2	0.160805	8.42402	9.46754e-15	5.21683e-12	9.46754e-15	0.001	0.000358658
chr1:161024782_rs12728349	USF1	-0.0822839	-8.42266	9.54762e-15	4.48275e-12	9.54762e-15	0.001	0.000358658
chr7:106588426_rs10953522	PRKAR2B	0.217382	8.41996	9.70862e-15	3.68204e-12	9.70862e-15	0.001	0.000358658
chr12:6862174_rs13402	MLF2	-0.107574	-8.41343	1.01086e-14	5.28478e-12	1.01086e-14	0.001	0.000358658
chr2:46769202_rs3754552	RHOQ	-0.131677	-8.41312	1.01281e-14	4.32672e-12	1.01281e-14	0.001	0.000358658
chr15:75700191_rs8029394	SIN3A	-0.0624663	-8.41294	1.01397e-14	3.96059e-12	1.01397e-14	0.001	0.000358658
chr16:28561982_rs13331170	NPIPL1	-0.101714	-8.41272	1.0153e-14	5.26611e-12	1.0153e-14	0.001	0.000358658
chr22:39428919_rs5757432	APOBEC3F	0.168827	8.41008	1.03206e-14	7.13494e-12	1.03206e-14	0.001	0.000358658
chr2:33695823_rs6714571	RASGRP3	-0.0967365	-8.40918	1.03777e-14	4.42617e-12	1.03777e-14	0.001	0.000358658
chr15:73990817_rs7182876	CD276	0.125839	8.40725	1.05027e-14	4.0972e-12	1.05027e-14	0.001	0.000358658
chr3:99505203_rs793498	CMSS1	0.223721	8.40411	1.07088e-14	6.1963e-12	1.07088e-14	0.001	0.000358658
chr17:4640565_rs7221871	MED11	0.225568	8.40097	1.09187e-14	4.84508e-12	1.09187e-14	0.001	0.000358658
chr22:21216695_rs165598	PI4KAP2	-0.345297	-8.39932	1.10306e-14	7.555e-12	1.10306e-14	0.001	0.000358658
chr1:71381871_rs142790749	PTGER3	-0.255886	-8.39667	1.12127e-14	5.22418e-12	1.12127e-14	0.001	0.000358658
chr8:26304273_rs55676339	BNIP3L	-0.0974635	-8.39484	1.13398e-14	6.16358e-12	1.13398e-14	0.001	0.000358658
chr19:8433196_rs7255436	ANGPTL4	-0.220691	-8.39455	1.13605e-14	1.23595e-11	1.13605e-14	0.001	0.000358658
chr6:24721667_rs1923187	C6orf62	0.097804	8.39312	1.14612e-14	2.84621e-12	1.14612e-14	0.001	0.000358658
chr6:136852285_rs3799465	MAP7	0.351223	8.393	1.14696e-14	2.84796e-12	1.14696e-14	0.001	0.000358658
chr11:6496333_rs11603308	TIMM10B	-0.166789	-8.39114	1.16025e-14	6.26738e-12	1.16025e-14	0.001	0.000358658
chr17:53594001_rs7503282	PCTP	0.135108	8.39032	1.16613e-14	5.15113e-12	1.16613e-14	0.001	0.000358658
chr13:31312178_rs12429692	ALOX5AP	-0.345002	-8.38755	1.18624e-14	9.23211e-12	1.18624e-14	0.001	0.000358658
chr4:4238347_rs61016366	TMEM128	-0.159583	-8.38754	1.1863e-14	5.19846e-12	1.1863e-14	0.001	0.000358658
chr9:139970225_rs4880088	UAP1L1	0.200784	8.38362	1.21538e-14	5.96016e-12	1.21538e-14	0.001	0.000358658
chr19:4408291_rs2267946	UBXN6	-0.0836205	-8.38122	1.23355e-14	1.33404e-11	1.23355e-14	0.001	0.000358658
chr10:49701445_rs9663545	ARHGAP22	-0.189604	-8.37978	1.2446e-14	4.18124e-12	1.2446e-14	0.001	0.000358658
chr1:236055904_rs6662633	LYST	-0.114837	-8.37878	1.25231e-14	5.8024e-12	1.25231e-14	0.001	0.000358658
chr17:56432767_rs56133607	SUPT4H1	0.102114	8.37547	1.27818e-14	5.61608e-12	1.27818e-14	0.001	0.000358658
chr7:19748700_rs2072185	TWISTNB	-0.145498	-8.37395	1.29018e-14	4.8068e-12	1.29018e-14	0.001	0.000358658
chr8:104093169_rs73291963	AK001351	0.518024	8.37102	1.31375e-14	7.06284e-12	1.31375e-14	0.001	0.000358658
chr7:6442371_rs9374	RAC1	0.0849445	8.36864	1.33322e-14	4.95865e-12	1.33322e-14	0.001	0.000358658
chr3:160803242_rs9861850	B3GALNT1	0.234983	8.36774	1.34065e-14	7.70698e-12	1.34065e-14	0.001	0.000358658
chr1:109340111_rs12736466	STXBP3	-0.0642776	-8.36708	1.34608e-14	6.21156e-12	1.34608e-14	0.001	0.000358658
chr1:85727044_rs11161574	BCL10	-0.0904691	-8.36441	1.36849e-14	6.30465e-12	1.36849e-14	0.001	0.000358658
chr22:42470589_rs4822088	SMDT1	-0.103602	-8.35988	1.40729e-14	9.48026e-12	1.40729e-14	0.001	0.000358658
chr3:119191398_rs6794833	POGLUT1	0.106064	8.35737	1.42918e-14	8.2041e-12	1.42918e-14	0.001	0.000358658
chr3:53933611_rs57398949	SELK	0.0909262	8.35698	1.43264e-14	8.22252e-12	1.43264e-14	0.001	0.000358658
chr4:2738880_rs232716	TNIP2	0.10372	8.35028	1.49307e-14	6.45538e-12	1.49307e-14	0.001	0.000358658
chr3:120423635_rs7429748	RABL3	-0.106544	-8.3444	1.54819e-14	8.86339e-12	1.54819e-14	0.001	0.000358658
chr12:67644656_rs775631	CAND1	-0.0641632	-8.34015	1.58934e-14	8.07247e-12	1.58934e-14	0.001	0.000358658
chr7:149297332_rs354043	ZNF746	-0.122495	-8.33876	1.60299e-14	5.89721e-12	1.60299e-14	0.001	0.000358658
chr8:38856336_rs56018450	TM2D2	0.0830033	8.33681	1.62237e-14	8.62577e-12	1.62237e-14	0.001	0.000358658
chr8:133785881_rs2467958	TMEM71	-0.327297	-8.33412	1.64946e-14	8.76546e-12	1.64946e-14	0.001	0.000358658
chr6:139073407_rs12194832	CCDC28A	0.14168	8.33259	1.66513e-14	4.05922e-12	1.66513e-14	0.001	0.000358658
chr17:37824545_rs876493	STARD3	0.0961645	8.33198	1.67137e-14	7.25787e-12	1.67137e-14	0.001	0.000358658
chr6:126659043_rs6919397	CENPW	0.213197	8.32924	1.69982e-14	4.13958e-12	1.69982e-14	0.001	0.000358658
chr2:109316789_rs7575335	LIMS1	0.0881665	8.31715	1.83123e-14	7.58559e-12	1.83123e-14	0.001	0.000358658
chr3:32195127_rs7622177	GPD1L	0.236584	8.31694	1.83356e-14	1.04448e-11	1.83356e-14	0.001	0.000358658
chr6:119344020_rs9481880	ASF1A	0.197255	8.31678	1.83532e-14	4.46077e-12	1.83532e-14	0.001	0.000358658
chr8:146228390_rs2294042	ZNF252P	-0.184246	-8.31617	1.84229e-14	9.71225e-12	1.84229e-14	0.001	0.000358658
chr15:40600198_rs3784400	PLCB2	0.187901	8.31519	1.85347e-14	7.02456e-12	1.85347e-14	0.001	0.000358658
chr20:3680833_rs864981	SIGLEC1	0.177476	8.31415	1.86534e-14	9.52651e-12	1.86534e-14	0.001	0.000358658
chr22:50961169_rs131813	NCAPH2	0.131759	8.3123	1.88668e-14	1.2348e-11	1.88668e-14	0.001	0.000358658
chr5:162912162_rs67109938	HMMR	-0.204274	-8.30955	1.91886e-14	7.7832e-12	1.91886e-14	0.001	0.000358658
chr2:178393324_rs77422409	AGPS	-0.0876617	-8.30246	2.00444e-14	8.27055e-12	2.00444e-14	0.001	0.000358658
chr2:25131161_rs6736210	ADCY3	0.20607	8.29702	2.07266e-14	8.52627e-12	2.07266e-14	0.001	0.000358658
chr4:25251209_rs192664247	PI4K2B	0.267679	8.29677	2.07586e-14	8.74894e-12	2.07586e-14	0.001	0.000358658
chr13:44489674_rs11147932	LACC1	-0.186322	-8.29482	2.10091e-14	1.58664e-11	2.10091e-14	0.001	0.000358658
chr7:5820720_rs2345666	RNF216	-0.0830009	-8.29439	2.10648e-14	7.60317e-12	2.10648e-14	0.001	0.000358658
chr1:156108048_rs520910	LMNA	0.160867	8.29133	2.14642e-14	9.64924e-12	2.14642e-14	0.001	0.000358658
chr3:128386042_rs56141228	RPN1	0.0707544	8.29037	2.15909e-14	1.21969e-11	2.15909e-14	0.001	0.000358658
chr7:139791109_rs12703533	LOC100134229	0.188311	8.28524	2.22831e-14	7.99645e-12	2.22831e-14	0.001	0.000358658
chr16:30340674_rs4788408	LOC613037	-0.142693	-8.28435	2.24057e-14	1.11508e-11	2.24057e-14	0.001	0.000358658
chr9:33285908_rs4878531	CHMP5	0.108214	8.28384	2.24761e-14	1.07319e-11	2.24761e-14	0.001	0.000358658
chr4:970112_rs12510382	TMEM175	-0.139956	-8.28258	2.26503e-14	9.48646e-12	2.26503e-14	0.001	0.000358658
chr1:241796284_rs676750	OPN3	-0.137094	-8.28055	2.29351e-14	1.02915e-11	2.29351e-14	0.001	0.000358658
chr10:73569318_rs4747199	PSAP	-0.117449	-8.27152	2.42417e-14	7.89708e-12	2.42417e-14	0.001	0.000358658
chr10:44923802_rs4948627	CXCL12	-0.555801	-8.26931	2.45736e-14	8.0009e-12	2.45736e-14	0.001	0.000358658
chr1:46726057_rs2295465	UQCRH	0.0984167	8.26705	2.49176e-14	1.11195e-11	2.49176e-14	0.001	0.000358658
chr4:154617263_rs1898832	TLR2	0.199623	8.26477	2.52679e-14	1.05077e-11	2.52679e-14	0.001	0.000358658
chr10:99473666_rs11189342	MARVELD1	0.268	8.26005	2.60107e-14	8.45067e-12	2.60107e-14	0.001	0.000358658
chr5:138990863_rs355156	UBE2D2	-0.119263	-8.25015	2.76392e-14	1.10069e-11	2.76392e-14	0.001	0.000358658
chr13:42906121_rs9594727	AKAP11	-0.118056	-8.24851	2.79202e-14	2.06731e-11	2.79202e-14	0.001	0.000358658
chr18:54377237_rs2469465	WDR7	0.210446	8.24518	2.84957e-14	1.9736e-11	2.84957e-14	0.001	0.000358658
chr11:13399080_rs10832029	BTBD10	-0.0882961	-8.24308	2.88651e-14	1.48419e-11	2.88651e-14	0.001	0.000358658
chr18:72177465_rs8084058	CNDP2	-0.0876022	-8.24208	2.90421e-14	2.0054e-11	2.90421e-14	0.001	0.000358658
chr6:34726838_rs7341253	SNRPC	0.0781319	8.24093	2.92482e-14	6.96753e-12	2.92482e-14	0.001	0.000358658
chr7:6884416_rs4299916	CCZ1	-0.436245	-8.24047	2.93303e-14	1.02544e-11	2.93303e-14	0.001	0.000358658
chr1:38013346_rs7518026	GNL2	-0.0730176	-8.23887	2.962e-14	1.30687e-11	2.962e-14	0.001	0.000358658
chr17:34822624_rs138153523	CCL4L2	0.946933	8.23586	3.01711e-14	1.27861e-11	3.01711e-14	0.001	0.000358658
chr11:32112568_rs223046	RCN1	0.128982	8.23398	3.05208e-14	1.56457e-11	3.05208e-14	0.001	0.000358658
chr11:118957357_rs2846282	HMBS	-0.199127	-8.23349	3.06119e-14	1.56899e-11	3.06119e-14	0.001	0.000358658
chr1:22000026_rs3818942	RAP1GAP	0.346434	8.23307	3.06909e-14	1.35132e-11	3.06909e-14	0.001	0.000358658
chr16:31011821_rs12716979	HSD3B7	-0.148654	-8.2318	3.09323e-14	1.49716e-11	3.09323e-14	0.001	0.000358658
chr7:75623520_rs112680895	POR	-0.165332	-8.23104	3.10757e-14	1.07841e-11	3.10757e-14	0.001	0.000358658
chr2:153222924_rs12618892	FMNL2	-0.121571	-8.2278	3.16998e-14	1.2718e-11	3.16998e-14	0.001	0.000358658
chr19:14128908_rs73519619	IL27RA	0.316276	8.22365	3.2516e-14	3.32596e-11	3.2516e-14	0.001	0.000358658
chr1:31230668_rs2273979	LAPTM5	-0.111143	-8.22335	3.25749e-14	1.4277e-11	3.25749e-14	0.001	0.000358658
chr15:82544927_rs3902959	EFTUD1	0.0795883	8.22257	3.27305e-14	1.21191e-11	3.27305e-14	0.001	0.000358658
chr10:26975807_rs1677737	PDSS1	0.160443	8.22239	3.27668e-14	1.05357e-11	3.27668e-14	0.001	0.000358658
chr2:153514583_rs6713779	PRPF40A	0.0509975	8.21202	3.49156e-14	1.39278e-11	3.49156e-14	0.001	0.000358658
chr7:73664710_rs3135660	LAT2	0.233666	8.20813	3.57565e-14	1.22713e-11	3.57565e-14	0.001	0.000358658
chr2:97024331_rs798202	STARD7	0.122834	8.20066	3.7428e-14	1.48321e-11	3.7428e-14	0.001	0.000358658
chr17:45185548_rs4564639	ARL17	-0.767614	-8.19652	3.83897e-14	1.60917e-11	3.83897e-14	0.001	0.000358658
chr11:118889813_rs3802883	RPS25	0.130552	8.19091	3.97298e-14	2.01005e-11	3.97298e-14	0.001	0.000358658
chr3:40498845_rs2276868	RPL14	0.0766295	8.19084	3.97447e-14	2.18721e-11	3.97447e-14	0.001	0.000358658
chr2:176073109_rs268171	ATP5G3	0.0814271	8.19041	3.98507e-14	1.57329e-11	3.98507e-14	0.001	0.000358658
chr11:95568757_rs473852	CEP57	-0.102914	-8.18267	4.17803e-14	2.10782e-11	4.17803e-14	0.001	0.000358658
chr19:53235501_rs73580414	ZNF611	0.157869	8.18245	4.18365e-14	4.19798e-11	4.18365e-14	0.001	0.000358658
chr8:132910317_rs12681059	EFR3A	0.0495929	8.18154	4.20714e-14	2.0731e-11	4.20714e-14	0.001	0.000358658
chr18:2638216_rs7244990	SMCHD1	0.105701	8.1806	4.23143e-14	2.83468e-11	4.23143e-14	0.001	0.000358658
chr7:98769025_rs4236540	SMURF1	0.070818	8.17702	4.32486e-14	1.46183e-11	4.32486e-14	0.001	0.000358658
chr6:16238737_rs10046457	GMPR	-0.163533	-8.17036	4.50463e-14	1.04979e-11	4.50463e-14	0.001	0.000358658
chr3:182810144_rs3732604	MCCC1	-0.130847	-8.16878	4.54811e-14	2.48619e-11	4.54811e-14	0.001	0.000358658
chr7:32999601_rs13311608	RP9P	-0.25693	-8.16871	4.55013e-14	1.53286e-11	4.55013e-14	0.001	0.000358658
chr7:24796693_rs1476522	DFNA5	-0.295261	-8.1672	4.59233e-14	1.54502e-11	4.59233e-14	0.001	0.000358658
chr3:111702991_rs3804764	ABHD10	0.178638	8.16316	4.70707e-14	2.56782e-11	4.70707e-14	0.001	0.000358658
chr7:77572461_rs848445	PHTF2	-0.115476	-8.16146	4.75604e-14	1.59639e-11	4.75604e-14	0.001	0.000358658
chr2:48201566_rs4952900	MSH6	0.10731	8.1588	4.83381e-14	1.88794e-11	4.83381e-14	0.001	0.000358658
chr14:59936592_rs74969230	RTN1	0.357787	8.15744	4.87418e-14	2.75632e-11	4.87418e-14	0.001	0.000358658
chr1:228675570_rs61827301	RNF187	-0.229169	-8.15444	4.96441e-14	2.12651e-11	4.96441e-14	0.001	0.000358658
chr1:33208623_rs58946763	YARS	0.181743	8.1529	5.01123e-14	2.14501e-11	5.01123e-14	0.001	0.000358658
chr12:26957065_rs12812268	ITPR2	-0.0879868	-8.15113	5.06568e-14	2.44359e-11	5.06568e-14	0.001	0.000358658
chr4:186349316_rs4861664	UFSP2	0.148254	8.1502	5.09432e-14	2.00759e-11	5.09432e-14	0.001	0.000358658
chr7:38290298_rs7781390	TRGC2	0.368289	8.13913	5.45041e-14	1.81584e-11	5.45041e-14	0.001	0.000358658
chr18:66327815_rs7227089	TMX3	-0.0874206	-8.13807	5.4857e-14	3.51627e-11	5.4857e-14	0.001	0.000358658
chr1:36509956_rs812106	AGO3	-0.201662	-8.13319	5.65119e-14	2.4049e-11	5.65119e-14	0.001	0.000358658
chr19:41732727_rs12984621	AXL	-0.278904	-8.12964	5.77495e-14	5.49376e-11	5.77495e-14	0.001	0.000358658
chr19:47119227_rs75660000	PTGIR	0.290292	8.12525	5.93149e-14	5.63831e-11	5.93149e-14	0.001	0.000358658
chr22:50518239_rs2235349	MLC1	0.398766	8.12509	5.9373e-14	3.48422e-11	5.9373e-14	0.001	0.000358658
chr16:19521262_rs7197660	GDE1	0.0919181	8.12361	5.99101e-14	2.73352e-11	5.99101e-14	0.001	0.000358658
chr12:125394461_rs28409800	UBC	-0.0721879	-8.11839	6.18443e-14	2.93175e-11	6.18443e-14	0.001	0.000358658
chr1:200651548_rs10920001	CAMSAP2	0.0887883	8.11634	6.2624e-14	2.65171e-11	6.2624e-14	0.001	0.000358658
chr3:51705962_rs6771491	TEX264	0.171416	8.11326	6.38094e-14	3.41221e-11	6.38094e-14	0.001	0.000358658
chr6:3108575_rs7769884	RIPK1	-0.252779	-8.10676	6.63818e-14	1.51654e-11	6.63818e-14	0.001	0.000358658
chr20:43570045_rs16989514	TOMM34	-0.215883	-8.10458	6.72704e-14	3.23546e-11	6.72704e-14	0.001	0.000358658
chr7:84784020_rs1019204	SEMA3D	0.305486	8.10235	6.81872e-14	2.24224e-11	6.81872e-14	0.001	0.000358658
chr1:20986078_rs623817	DDOST	-0.0638005	-8.1002	6.90852e-14	2.91423e-11	6.90852e-14	0.001	0.000358658
chr13:37025916_rs4941839	CCNA1	0.15758	8.09622	7.0778e-14	4.88017e-11	7.0778e-14	0.001	0.000358658
chr4:57825336_rs6554401	REST	0.0727677	8.09155	7.28178e-14	2.80322e-11	7.28178e-14	0.001	0.000358658
chr7:74117893_rs6973978	NCF1	-0.207941	-8.09093	7.30944e-14	2.38863e-11	7.30944e-14	0.001	0.000358658
chr20:2848825_rs628248	PCED1A	0.223221	8.09073	7.31821e-14	3.50426e-11	7.31821e-14	0.001	0.000358658
chr16:69470143_rs246146	CYB5B	-0.0896901	-8.08431	7.60962e-14	3.41274e-11	7.60962e-14	0.001	0.000358658
chr18:61629158_rs56390579	SERPINB8	0.112812	8.08381	7.63279e-14	4.6252e-11	7.63279e-14	0.001	0.000358658
chr4:76858000_rs28588114	NAAA	0.199792	8.08346	7.64898e-14	2.9281e-11	7.64898e-14	0.001	0.000358658
chr17:4845768_rs238247	ENO3	0.191546	8.07707	7.95196e-14	3.21266e-11	7.95196e-14	0.001	0.000358658
chr4:122091233_rs13129450	TNIP3	-0.17902	-8.07423	8.09007e-14	3.08735e-11	8.09007e-14	0.001	0.000358658
chr1:205597321_rs4951247	ELK4	0.0687797	8.0693	8.33632e-14	3.48192e-11	8.33632e-14	0.001	0.000358658
chr11:10481613_rs936514	AMPD3	-0.252789	-8.05993	8.82412e-14	4.25871e-11	8.82412e-14	0.001	0.000358658
chr7:22893795_rs11983782	SNORD93	-0.307588	-8.05977	8.83269e-14	2.84907e-11	8.83269e-14	0.001	0.000358658
chr12:49402393_rs10875910	PRKAG1	-0.0691722	-8.05945	8.85023e-14	4.10487e-11	8.85023e-14	0.001	0.000358658
chr15:90471917_rs1256854	ZNF710	-0.113078	-8.05625	9.02369e-14	3.16021e-11	9.02369e-14	0.001	0.000358658
chr7:148488930_rs62505367	EZH2	0.0819739	8.05129	9.29957e-14	2.99269e-11	9.29957e-14	0.001	0.000358658
chr13:45894765_rs11620348	TPT1	0.0848889	8.04952	9.40002e-14	6.37271e-11	9.40002e-14	0.001	0.000358658
chr1:155100265_rs11264331	ADAM15	0.16619	8.04232	9.81922e-14	4.03638e-11	9.81922e-14	0.001	0.000358658
chr6:32977535_rs396090	HLA-DOA	0.269307	8.04203	9.83655e-14	2.20492e-11	9.83655e-14	0.001	0.000358658
chr18:44602292_rs2289132	HDHD2	-0.204101	-8.03725	1.01257e-13	5.87291e-11	1.01257e-13	0.001	0.000358658
chr10:95083039_rs11594445	MYOF	0.241358	8.03303	1.03883e-13	3.12075e-11	1.03883e-13	0.001	0.000358658
chr3:151099741_rs6787801	P2RY12	0.676438	8.03252	1.04202e-13	5.39437e-11	1.04202e-13	0.001	0.000358658
chr2:69984345_rs11902722	ANXA4	0.113237	8.02712	1.07674e-13	4.03398e-11	1.07674e-13	0.001	0.000358658
chr12:120879294_rs61945857	COQ5	-0.13532	-8.02552	1.08718e-13	4.97745e-11	1.08718e-13	0.001	0.000358658
chr15:81415475_rs116301235	C15orf26	0.36712	8.01394	1.16616e-13	4.02911e-11	1.16616e-13	0.001	0.000358658
chr11:2660603_rs11023583	CDKN1C	-0.491274	-8.01067	1.18949e-13	5.63336e-11	1.18949e-13	0.001	0.000358658
chr7:138813925_rs59313845	UBN2	0.244289	8.00889	1.2024e-13	3.81734e-11	1.2024e-13	0.001	0.000358658
chr7:157089831_rs2527870	DNAJB6	0.0841343	8.00757	1.21202e-13	3.84669e-11	1.21202e-13	0.001	0.000358658
chr6:74432636_rs9442951	CD109	0.141146	8.00635	1.22104e-13	2.69707e-11	1.22104e-13	0.001	0.000358658
chr14:50665037_rs58509432	METTL21D	0.194779	8.00176	1.25537e-13	6.57835e-11	1.25537e-13	0.001	0.000358658
chr7:75495524_rs757589	CCL24	0.739366	8.00031	1.26649e-13	4.00952e-11	1.26649e-13	0.001	0.000358658
chr10:45435314_rs61854008	RASSF4	-0.151125	-7.99687	1.29307e-13	3.84503e-11	1.29307e-13	0.001	0.000358658
chr19:53496480_rs189069	ZNF702P	1.34376	7.99332	1.32117e-13	1.19412e-10	1.32117e-13	0.001	0.000358658
chr20:43989244_rs2743409	SYS1-DBNDD2	-0.179177	-7.98787	1.36545e-13	6.30584e-11	1.36545e-13	0.001	0.000358658
chr7:99965285_rs705866	PILRB	-0.132906	-7.98246	1.41078e-13	4.4167e-11	1.41078e-13	0.001	0.000358658
chr7:47993055_rs11767485	HUS1	-0.132089	-7.98071	1.42584e-13	4.45613e-11	1.42584e-13	0.001	0.000358658
chr22:20306716_rs2280116	DGCR6L	0.14515	7.97928	1.43822e-13	8.08308e-11	1.43822e-13	0.001	0.000358658
chr10:99400214_rs3814557	PI4K2A	-0.102051	-7.97881	1.44223e-13	4.26818e-11	1.44223e-13	0.001	0.000358658
chr6:33290872_rs116303264	WDR46	-0.119164	-7.97758	1.45303e-13	3.18314e-11	1.45303e-13	0.001	0.000358658
chr2:86071864_rs2280314	ST3GAL5	-0.107742	-7.97748	1.45392e-13	5.35614e-11	1.45392e-13	0.001	0.000358658
chr17:74282231_rs346787	UBALD2	0.102807	7.9726	1.49739e-13	5.88173e-11	1.49739e-13	0.001	0.000358658
chr14:23285439_rs1951568	SLC7A7	0.132133	7.96773	1.5421e-13	7.94604e-11	1.5421e-13	0.001	0.000358658
chr3:189837058_rs838276	LEPREL1	-0.254574	-7.96255	1.59111e-13	8.02494e-11	1.59111e-13	0.001	0.000358658
chr12:56396768_rs1689510	IKZF4	0.203837	7.95782	1.63715e-13	7.3109e-11	1.63715e-13	0.001	0.000358658
chr7:45139163_rs6967748	TBRG4	-0.0810323	-7.95775	1.63786e-13	5.04454e-11	1.63786e-13	0.001	0.000358658
chr1:179818132_rs1281412	TOR1AIP1	-0.0570961	-7.95746	1.64068e-13	6.5369e-11	1.64068e-13	0.001	0.000358658
chr14:99968377_rs2069496	SETD3	-0.0701306	-7.95665	1.64877e-13	8.42643e-11	1.64877e-13	0.001	0.000358658
chr6:32806391_rs4148870	TAP1	-0.0428409	-7.94598	1.7584e-13	3.81165e-11	1.7584e-13	0.001	0.000358658
chr4:156598008_rs4691047	GUCY1A3	0.302716	7.94403	1.77922e-13	6.37205e-11	1.77922e-13	0.001	0.000358658
chr17:18114912_rs28641923	ALKBH5	-0.112696	-7.94351	1.78477e-13	6.97546e-11	1.78477e-13	0.001	0.000358658
chr11:67200819_rs4930427	RPS6KB2	0.0928898	7.93079	1.92699e-13	8.68601e-11	1.92699e-13	0.001	0.000358658
chr22:24336170_rs72495501	DDT	0.175476	7.92932	1.94414e-13	1.07665e-10	1.94414e-13	0.001	0.000358658
chr20:30228157_rs6088864	HM13	-0.0813629	-7.92545	1.98995e-13	9.03603e-11	1.98995e-13	0.001	0.000358658
chr17:73881056_rs7207180	TRIM65	0.145855	7.92527	1.99211e-13	7.76194e-11	1.99211e-13	0.001	0.000358658
chr12:125046036_rs10773093	NCOR2	-0.0787981	-7.92299	2.01971e-13	8.9421e-11	2.01971e-13	0.001	0.000358658
chr3:71829467_rs7634474	EIF4E3	0.206422	7.91381	2.13442e-13	1.05585e-10	2.13442e-13	0.001	0.000358658
chr3:135993599_rs684195	PCCB	-0.10565	-7.91337	2.14013e-13	1.05851e-10	2.14013e-13	0.001	0.000358658
chr12:51715681_rs4762041	BIN2	-0.105995	-7.91006	2.18314e-13	9.62516e-11	2.18314e-13	0.001	0.000358658
chr1:153960004_rs72694280	RAB13	-0.10506	-7.90881	2.19972e-13	8.6356e-11	2.19972e-13	0.001	0.000358658
chr18:46812428_rs79086219	DYM	0.124785	7.90667	2.22822e-13	1.21792e-10	2.22822e-13	0.001	0.000358658
chr11:64046641_rs11231740	CCDC88B	-0.148982	-7.90641	2.23167e-13	9.95492e-11	2.23167e-13	0.001	0.000358658
chr3:151033597_rs6767266	P2RY13	-0.811871	-7.9043	2.26024e-13	1.11053e-10	2.26024e-13	0.001	0.000358658
chr19:3188492_rs487326	NCLN	0.0871434	7.90267	2.28243e-13	2.0075e-10	2.28243e-13	0.001	0.000358658
chr3:100402027_rs11710244	TFG	0.0660052	7.90051	2.31238e-13	1.1344e-10	2.31238e-13	0.001	0.000358658
chr19:45416291_rs59325138	APOC1	0.502882	7.89581	2.37857e-13	2.08869e-10	2.37857e-13	0.001	0.000358658
chr17:42410180_rs4793095	SLC25A39	0.0715189	7.89558	2.3819e-13	9.20804e-11	2.3819e-13	0.001	0.000358658
chr1:113417881_rs2884871	SLC16A1	0.126904	7.88859	2.48418e-13	9.69187e-11	2.48418e-13	0.001	0.000358658
chr20:55986801_rs6099612	RBM38	0.185171	7.88482	2.54111e-13	1.14125e-10	2.54111e-13	0.001	0.000358658
chr16:68298193_rs12162068	SLC7A6	-0.164561	-7.88268	2.57393e-13	1.05803e-10	2.57393e-13	0.001	0.000358658
chr8:55047719_rs2292589	LYPLA1	0.0750222	7.88181	2.58736e-13	1.11687e-10	2.58736e-13	0.001	0.000358658
chr17:80002371_rs57998969	DCXR	-0.191708	-7.87847	2.6398e-13	1.01563e-10	2.6398e-13	0.001	0.000358658
chr9:108454343_rs10978204	TMEM38B	-0.171706	-7.8738	2.71501e-13	1.16904e-10	2.71501e-13	0.001	0.000358658
chr11:88069457_rs217080	CTSC	-0.16684	-7.87331	2.72291e-13	1.19784e-10	2.72291e-13	0.001	0.000358658
chr10:104349127_rs7068535	SUFU	-0.135434	-7.87277	2.73175e-13	7.70678e-11	2.73175e-13	0.001	0.000358658
chr19:55910357_rs75792235	RPL28	0.128168	7.87016	2.77493e-13	2.41336e-10	2.77493e-13	0.001	0.000358658
chr15:65906467_rs28661781	DENND4A	-0.119076	-7.86942	2.78732e-13	9.20374e-11	2.78732e-13	0.001	0.000358658
chr6:149717319_rs237030	TAB2	-0.0967281	-7.86777	2.81505e-13	5.93937e-11	2.81505e-13	0.001	0.000358658
chr19:38749390_rs112048422	PPP1R14A	-0.367566	-7.86768	2.81658e-13	2.44749e-10	2.81658e-13	0.001	0.000358658
chr8:67661515_rs4613982	C8orf44-SGK3	-0.211534	-7.86683	2.83102e-13	1.21562e-10	2.83102e-13	0.001	0.000358658
chr17:7411855_rs4796432	ZBTB4	-0.179094	-7.86636	2.83894e-13	1.08908e-10	2.83894e-13	0.001	0.000358658
chr9:127977545_rs359590	PPP6C	-0.0526008	-7.86388	2.88156e-13	1.23653e-10	2.88156e-13	0.001	0.000358658
chr5:112169136_rs383256	APC	-0.065524	-7.85749	2.99421e-13	1.0653e-10	2.99421e-13	0.001	0.000358658
chr1:19722510_rs10799808	CAPZB	-0.0598558	-7.85627	3.01611e-13	1.16289e-10	3.01611e-13	0.001	0.000358658
chr7:35075619_rs329270	DPY19L1	0.137077	7.85276	3.08038e-13	9.13956e-11	3.08038e-13	0.001	0.000358658
chr8:98776433_rs34060536	LAPTM4B	0.363238	7.84633	3.20146e-13	1.36665e-10	3.20146e-13	0.001	0.000358658
chr16:1306355_rs1800984	TPSAB1	1.20451	7.84573	3.21303e-13	1.30508e-10	3.21303e-13	0.001	0.000358658
chr11:61591915_rs192793035	FADS2	-0.243284	-7.84435	3.23963e-13	1.41297e-10	3.23963e-13	0.001	0.000358658
chr8:22326717_rs4872504	SORBS3	-0.350303	-7.84048	3.31563e-13	1.41226e-10	3.31563e-13	0.001	0.000358658
chr3:153031539_rs6785362	RAP2B	-0.106384	-7.84022	3.32075e-13	1.5848e-10	3.32075e-13	0.001	0.000358658
chr22:19929551_rs3788319	TXNRD2	0.131579	7.84017	3.32183e-13	1.79251e-10	3.32183e-13	0.001	0.000358658
chr5:115184450_rs26529	ATG12	-0.0820508	-7.827	3.59457e-13	1.26798e-10	3.59457e-13	0.001	0.000358658
chr12:121563267_rs7309886	P2RX7	0.157951	7.82115	3.72269e-13	1.58785e-10	3.72269e-13	0.001	0.000358658
chr22:24157537_rs35370296	SMARCB1	0.116339	7.82088	3.72861e-13	2.00176e-10	3.72861e-13	0.001	0.000358658
chr9:94767432_rs58679317	SPTLC1	0.102956	7.8192	3.76625e-13	1.59613e-10	3.76625e-13	0.001	0.000358658
chr17:501640_rs181634327	VPS53	-0.170407	-7.81851	3.78195e-13	1.43126e-10	3.78195e-13	0.001	0.000358658
chr2:218931055_rs10932740	CXCR2P1	0.166343	7.81573	3.8454e-13	1.33936e-10	3.8454e-13	0.001	0.000358658
chr2:70183611_rs10164921	MXD1	0.141631	7.81189	3.93463e-13	1.36819e-10	3.93463e-13	0.001	0.000358658
chr2:219632722_rs142506450	CYP27A1	-0.484529	-7.8118	3.93688e-13	1.36876e-10	3.93688e-13	0.001	0.000358658
chr13:52328844_rs9535749	WDFY2	0.134866	7.8033	4.1421e-13	2.52366e-10	4.1421e-13	0.001	0.000358658
chr12:62823325_rs7962354	USP15	0.0344352	7.80327	4.14301e-13	1.7574e-10	4.14301e-13	0.001	0.000358658
chr10:5933767_rs792348	FBXO18	0.0772481	7.80181	4.17917e-13	1.14574e-10	4.17917e-13	0.001	0.000358658
chr16:28823755_rs4533290	AK125489	-0.574665	-7.80029	4.2173e-13	1.67847e-10	4.2173e-13	0.001	0.000358658
chr17:19581009_rs3760489	ALDH3A2	-0.18003	-7.79933	4.24176e-13	1.59868e-10	4.24176e-13	0.001	0.000358658
chr16:84698394_rs881583	KLHL36	0.108624	7.79709	4.29874e-13	1.7084e-10	4.29874e-13	0.001	0.000358658
chr20:3206068_rs6051655	ITPA	0.129582	7.7944	4.36856e-13	1.90402e-10	4.36856e-13	0.001	0.000358658
chr11:67813573_rs12273861	TCIRG1	-0.0637867	-7.79177	4.43763e-13	1.90398e-10	4.43763e-13	0.001	0.000358658
chr19:17206465_rs6512166	MYO9B	-0.0684398	-7.78859	4.52284e-13	3.81928e-10	4.52284e-13	0.001	0.000358658
chr4:146404442_rs73852318	SMAD1	-0.237849	-7.78659	4.57715e-13	1.54975e-10	4.57715e-13	0.001	0.000358658
chr8:134288334_rs12679917	NDRG1	-0.199964	-7.78481	4.626e-13	1.94077e-10	4.626e-13	0.001	0.000358658
chr11:121181207_rs141633273	SC5D	-0.181717	-7.77997	4.76177e-13	2.03356e-10	4.76177e-13	0.001	0.000358658
chr19:7785713_rs2335525	CD209	0.128753	7.77974	4.76835e-13	4.01486e-10	4.76835e-13	0.001	0.000358658
chr6:109744533_rs9480955	SMPD2	-0.180007	-7.77934	4.77958e-13	9.82967e-11	4.77958e-13	0.001	0.000358658
chr16:4600665_rs11076839	NMRAL1	-0.260454	-7.77922	4.78312e-13	1.88874e-10	4.78312e-13	0.001	0.000358658
chr7:44860763_rs12702091	ZMIZ2	0.0550223	7.77777	4.8247e-13	1.38897e-10	4.8247e-13	0.001	0.000358658
chr16:90042756_rs11639855	DEF8	-0.251231	-7.77726	4.83929e-13	1.91e-10	4.83929e-13	0.001	0.000358658
chr9:131114009_rs9695928	COQ4	0.293979	7.76947	5.06978e-13	2.08902e-10	5.06978e-13	0.001	0.000358658
chr3:122047302_rs12632735	CSTA	-0.323787	-7.75707	5.45889e-13	2.41874e-10	5.45889e-13	0.001	0.000358658
chr14:21205373_rs11626386	RNASE6	0.145907	7.75405	5.55801e-13	2.62226e-10	5.55801e-13	0.001	0.000358658
chr14:24899194_rs10146759	KHNYN	0.110462	7.74584	5.83681e-13	2.7467e-10	5.83681e-13	0.001	0.000358658
chr17:3549268_rs224504	CTNS	-0.131148	-7.74549	5.84898e-13	2.15843e-10	5.84898e-13	0.001	0.000358658
chr6:29634012_rs115538733	HLA-G	0.26953	7.74443	5.886e-13	1.19746e-10	5.886e-13	0.001	0.000358658
chr19:49855127_rs56222689	CD37	0.195799	7.7428	5.94356e-13	4.94332e-10	5.94356e-13	0.001	0.000358658
chr7:7194395_rs2347888	C1GALT1	0.0925657	7.74248	5.95495e-13	1.69384e-10	5.95495e-13	0.001	0.000358658
chr1:229461024_rs2282083	RAB4A	0.0948135	7.73776	6.12467e-13	2.2388e-10	6.12467e-13	0.001	0.000358658
chr5:180259563_rs79222378	LINC00847	0.458325	7.73195	6.3402e-13	2.18413e-10	6.3402e-13	0.001	0.000358658
chr19:41324115_rs71358935	EGLN2	-0.264283	-7.72998	6.41493e-13	5.30212e-10	6.41493e-13	0.001	0.000358658
chr17:677420_rs78647220	FAM57A	0.364958	7.72472	6.61905e-13	2.40213e-10	6.61905e-13	0.001	0.000358658
chr2:55446356_rs1437391	RTN4	-0.0518016	-7.71576	6.98132e-13	2.33728e-10	6.98132e-13	0.001	0.000358658
chr5:149408581_rs55862167	HMGXB3	-0.082114	-7.71382	7.06217e-13	2.42354e-10	7.06217e-13	0.001	0.000358658
chr2:235334764_rs12692135	ARL4C	-0.175928	-7.7136	7.07144e-13	2.36637e-10	7.07144e-13	0.001	0.000358658
chr9:95538771_rs10992462	BICD2	0.0738067	7.7133	7.08408e-13	2.87497e-10	7.08408e-13	0.001	0.000358658
chr17:78096483_rs12941055	EIF4A3	0.104301	7.70919	7.25935e-13	2.6187e-10	7.25935e-13	0.001	0.000358658
chr11:8927206_rs10734638	TMEM9B	0.0595355	7.70882	7.27555e-13	3.02555e-10	7.27555e-13	0.001	0.000358658
chr19:18296867_rs10410017	MPV17L2	-0.162057	-7.70837	7.29477e-13	5.97102e-10	7.29477e-13	0.001	0.000358658
chr6:34408381_rs149027763	RPS10	0.0969451	7.70593	7.40147e-13	1.48953e-10	7.40147e-13	0.001	0.000358658
chr2:85574456_rs6547616	RETSAT	-0.178368	-7.70108	7.61782e-13	2.53953e-10	7.61782e-13	0.001	0.000358658
chr1:113230394_rs2932537	CAPZA1	0.0453902	7.69245	8.01863e-13	2.88054e-10	8.01863e-13	0.001	0.000358658
chr11:110187960_rs1784656	RDX	0.12267	7.69035	8.11889e-13	3.34621e-10	8.11889e-13	0.001	0.000358658
chr10:127738918_rs1710278	ADAM12	0.342048	7.6894	8.16482e-13	2.1559e-10	8.16482e-13	0.001	0.000358658
chr10:91005952_rs2246828	LIPA	-0.0559957	-7.68835	8.21627e-13	2.16831e-10	8.21627e-13	0.001	0.000358658
chr3:100074759_rs277647	TOMM70A	0.0591214	7.67657	8.81104e-13	3.70622e-10	8.81104e-13	0.001	0.000358658
chr12:93997128_rs1498707	SOCS2	0.13445	7.67284	9.00822e-13	3.63831e-10	9.00822e-13	0.001	0.000358658
chr22:41231053_rs138337	ST13	-0.042467	-7.66927	9.20085e-13	4.73128e-10	9.20085e-13	0.001	0.000358658
chr7:128736849_rs11972310	TSPAN33	0.155517	7.66713	9.31822e-13	2.58877e-10	9.31822e-13	0.001	0.000358658
chr6:44058579_rs1138991	TMEM63B	0.0905109	7.66248	9.57846e-13	1.90719e-10	9.57846e-13	0.001	0.000358658
chr17:77071002_rs8076010	ENGASE	-0.218784	-7.65667	9.91448e-13	3.52612e-10	9.91448e-13	0.001	0.000358658
chr6:137540370_rs7749390	IFNGR1	0.0933431	7.65613	9.94576e-13	1.97725e-10	9.94576e-13	0.001	0.000358658
chr17:1013671_rs2258277	ABR	0.0755052	7.65524	9.99887e-13	3.55422e-10	9.99887e-13	0.001	0.000358658
chr7:30543249_rs38413	LOC401320	0.175962	7.65198	1.01933e-12	2.81902e-10	1.01933e-12	0.001	0.000358658
chr22:30492300_rs4823071	LIF	-0.638995	-7.65115	1.02437e-12	5.21302e-10	1.02437e-12	0.001	0.000358658
chr10:6204506_rs10905925	PFKFB3	-0.176438	-7.6481	1.04305e-12	2.72422e-10	1.04305e-12	0.001	0.000358658
chr11:117087792_rs2238006	PAFAH1B2	0.0767966	7.64707	1.04943e-12	4.22585e-10	1.04943e-12	0.001	0.000358658
chr11:809666_rs72844798	RPLP2	-0.0875993	-7.64586	1.05699e-12	4.2545e-10	1.05699e-12	0.001	0.000358658
chr2:238807450_rs72980138	RAMP1	-0.196492	-7.64398	1.06881e-12	3.49354e-10	1.06881e-12	0.001	0.000358658
chr3:46047171_rs751667	FYCO1	0.239766	7.64367	1.07075e-12	4.44542e-10	1.07075e-12	0.001	0.000358658
chr1:154408340_rs4845371	IL6R	-0.0960966	-7.63974	1.09594e-12	3.84958e-10	1.09594e-12	0.001	0.000358658
chr17:19493280_rs58835440	SLC47A1	-0.388994	-7.63836	1.10496e-12	3.913e-10	1.10496e-12	0.001	0.000358658
chr10:43578953_rs2435361	RET	-0.178505	-7.6376	1.10994e-12	2.88497e-10	1.10994e-12	0.001	0.000358658
chr2:62495245_rs4672487	B3GNT2	0.107338	7.63307	1.14006e-12	3.7143e-10	1.14006e-12	0.001	0.000358658
chr8:59331593_rs16923452	UBXN2B	0.119681	7.63116	1.15306e-12	4.58376e-10	1.15306e-12	0.001	0.000358658
chr22:50974100_rs4824129	ODF3B	-0.141965	-7.63006	1.16058e-12	5.84571e-10	1.16058e-12	0.001	0.000358658
chr17:67188545_rs8068468	ABCA6	0.343661	7.62656	1.18485e-12	4.1807e-10	1.18485e-12	0.001	0.000358658
chr12:56379427_rs1873914	RAB5B	-0.0595239	-7.62272	1.21202e-12	4.80607e-10	1.21202e-12	0.001	0.000358658
chr11:124048956_rs2512265	OR8G1	0.502502	7.62248	1.21376e-12	4.84508e-10	1.21376e-12	0.001	0.000358658
chr17:73663372_rs820156	SAP30BP	-0.0774856	-7.62142	1.22141e-12	4.30096e-10	1.22141e-12	0.001	0.000358658
chr12:58085198_rs2928064	OS9	-0.0354591	-7.62114	1.22342e-12	4.84688e-10	1.22342e-12	0.001	0.000358658
chr16:11700928_rs72781038	LITAF	0.109249	7.62015	1.23058e-12	4.65019e-10	1.23058e-12	0.001	0.000358658
chr7:107528102_rs6965674	DLD	-0.0634036	-7.61748	1.25015e-12	3.40872e-10	1.25015e-12	0.001	0.000358658
chr12:77198604_rs7956259	CSRP2	0.162776	7.61683	1.25499e-12	4.95963e-10	1.25499e-12	0.001	0.000358658
chr6:36975033_rs831512	FGD2	0.0534329	7.61498	1.26881e-12	2.49394e-10	1.26881e-12	0.001	0.000358658
chr17:72567262_rs1719517	CD300C	0.31517	7.61364	1.27886e-12	4.4894e-10	1.27886e-12	0.001	0.000358658
chr4:41360294_rs10034857	LIMCH1	-0.227004	-7.60185	1.37109e-12	4.3791e-10	1.37109e-12	0.001	0.000358658
chr1:27081864_rs80157960	BC016143	0.160939	7.59792	1.40326e-12	4.85035e-10	1.40326e-12	0.001	0.000358658
chr3:38201847_rs61489189	ACAA1	0.17723	7.59677	1.41279e-12	5.77318e-10	1.41279e-12	0.001	0.000358658
chr16:46738418_rs698416	C16orf87	0.166062	7.59587	1.42031e-12	5.32233e-10	1.42031e-12	0.001	0.000358658
chr3:151507013_rs56155810	SUCNR1	-0.25899	-7.5949	1.42846e-12	5.83499e-10	1.42846e-12	0.001	0.000358658
chr16:30339753_rs77948921	LOC595101	0.282756	7.59371	1.43855e-12	5.38414e-10	1.43855e-12	0.001	0.000358658
chr3:112102964_rs2633594	CD200	-0.326937	-7.58606	1.50495e-12	6.13331e-10	1.50495e-12	0.001	0.000358658
chr6:33073322_rs114692341	HLA-DPB2	-4.98218	-7.58499	1.5145e-12	2.9524e-10	1.5145e-12	0.001	0.000358658
chr11:67796756_rs3115547	NDUFS8	-0.117783	-7.58477	1.51647e-12	5.96243e-10	1.51647e-12	0.001	0.000358658
chr11:47873883_rs6485788	CELF1	-0.0731532	-7.57672	1.59019e-12	6.2249e-10	1.59019e-12	0.001	0.000358658
chr3:13054086_rs360829	IQSEC1	0.0877699	7.57616	1.59544e-12	6.48884e-10	1.59544e-12	0.001	0.000358658
chr5:156520813_rs6862573	HAVCR2	0.107507	7.57474	1.60885e-12	5.281e-10	1.60885e-12	0.001	0.000358658
chr8:97825208_rs10955084	CPQ	-0.118153	-7.57234	1.63171e-12	6.36924e-10	1.63171e-12	0.001	0.000358658
chr22:40837822_rs12170360	SGSM3	0.0970734	7.5699	1.65538e-12	8.18977e-10	1.65538e-12	0.001	0.000358658
chr13:25074568_rs73154379	PARP4	0.143839	7.56954	1.65887e-12	9.22525e-10	1.65887e-12	0.001	0.000358658
chr14:52789060_rs1254591	PTGER2	-0.240764	-7.56868	1.66733e-12	7.22462e-10	1.66733e-12	0.001	0.000358658
chr22:43583598_rs9612021	TTLL12	0.176732	7.56723	1.68159e-12	8.31388e-10	1.68159e-12	0.001	0.000358658
chr11:105893494_rs11226896	MSANTD4	-0.164964	-7.55618	1.79467e-12	6.95842e-10	1.79467e-12	0.001	0.000358658
chr6:112133530_rs12055398	FYN	0.263556	7.55567	1.8e-12	3.47547e-10	1.8e-12	0.001	0.000358658
chr12:916310_rs10849559	WNK1	-0.054949	-7.55527	1.80428e-12	6.95537e-10	1.80428e-12	0.001	0.000358658
chr19:47081250_rs11670297	CALM3	0.127192	7.55494	1.80776e-12	1.39482e-09	1.80776e-12	0.001	0.000358658
chr3:183746044_rs7639048	ABCC5	0.149529	7.53901	1.98536e-12	8.02362e-10	1.98536e-12	0.001	0.000358658
chr1:167919491_rs202274	MPC2	0.148267	7.53773	2.00033e-12	6.74169e-10	2.00033e-12	0.001	0.000358658
chr19:54875881_rs62132211	LAIR2	-1.515	-7.53144	2.07574e-12	1.59058e-09	2.07574e-12	0.001	0.000358658
chr19:17419848_rs7252571	MRPL34	-0.129351	-7.52976	2.09627e-12	1.60582e-09	2.09627e-12	0.001	0.000358658
chr10:7842389_rs1244426	ATP5C1	0.0511422	7.52462	2.16061e-12	5.35176e-10	2.16061e-12	0.001	0.000358658
chr4:175476370_rs10520287	HPGD	-0.604052	-7.52182	2.19644e-12	6.85681e-10	2.19644e-12	0.001	0.000358658
chr1:9958894_rs12043673	CTNNBIP1	0.258318	7.51954	2.226e-12	7.45251e-10	2.226e-12	0.001	0.000358658
chr15:91427612_rs12906125	FES	0.216448	7.51924	2.22998e-12	6.62304e-10	2.22998e-12	0.001	0.000358658
chr17:4611839_rs2326117	ARRB2	0.197737	7.51847	2.24004e-12	7.63192e-10	2.24004e-12	0.001	0.000358658
chr11:2998176_rs16928966	CARS	0.109741	7.51839	2.24103e-12	8.56415e-10	2.24103e-12	0.001	0.000358658
chr3:133144795_rs184014247	CDV3	-0.420026	-7.51805	2.24556e-12	8.99332e-10	2.24556e-12	0.001	0.000358658
chr19:3142784_rs901020	GNA15	0.104475	7.51363	2.30463e-12	1.75339e-09	2.30463e-12	0.001	0.000358658
chr3:172228827_rs1126161	TNFSF10	0.100333	7.50959	2.3599e-12	9.40994e-10	2.3599e-12	0.001	0.000358658
chr9:27529734_rs3736321	MOB3B	-0.110677	-7.50943	2.36203e-12	9.00572e-10	2.36203e-12	0.001	0.000358658
chr5:179262233_rs248241	C5orf45	-0.145252	-7.50887	2.36982e-12	7.66766e-10	2.36982e-12	0.001	0.000358658
chr3:157828322_rs11713363	RSRC1	0.102027	7.50788	2.38366e-12	9.49521e-10	2.38366e-12	0.001	0.000358658
chr9:77744416_rs6560421	NMRK1	0.121501	7.50408	2.43741e-12	9.27541e-10	2.43741e-12	0.001	0.000358658
chr10:21809412_rs34853448	MLLT10	0.0987614	7.49408	2.58462e-12	6.31908e-10	2.58462e-12	0.001	0.000358658
chr7:42945367_rs648956	MRPL32	0.0934432	7.49046	2.64001e-12	6.93782e-10	2.64001e-12	0.001	0.000358658
chr11:125392705_rs4935922	EI24	-0.106239	-7.48874	2.66682e-12	1.00563e-09	2.66682e-12	0.001	0.000358658
chr18:29665712_rs4799325	RNF138	0.0640549	7.48854	2.66981e-12	1.02054e-09	2.66981e-12	0.001	0.000358658
chr1:19549759_rs710870	EMC1	0.0711384	7.4881	2.67686e-12	8.85717e-10	2.67686e-12	0.001	0.000358658
chr12:105037956_rs2559643	CHST11	0.0776981	7.48734	2.6888e-12	1.00928e-09	2.6888e-12	0.001	0.000358658
chr17:7347123_rs4151134	CHRNB1	-0.0947999	-7.48431	2.7368e-12	9.24252e-10	2.7368e-12	0.001	0.000358658
chr17:48486179_rs9797156	EME1	0.0731457	7.48007	2.80564e-12	9.46245e-10	2.80564e-12	0.001	0.000358658
chr12:6248585_rs11064046	CD9	0.250304	7.47411	2.90539e-12	1.08542e-09	2.90539e-12	0.001	0.000358658
chr1:171402243_rs10912991	PRRC2C	0.0382376	7.47322	2.92047e-12	9.60031e-10	2.92047e-12	0.001	0.000358658
chr1:150255587_rs2147324	C1orf54	-0.122239	-7.46921	2.98984e-12	9.81145e-10	2.98984e-12	0.001	0.000358658
chr2:135694848_rs4953938	CCNT2	0.0436406	7.46861	3.00043e-12	9.27263e-10	3.00043e-12	0.001	0.000358658
chr11:71151540_rs10898144	DHCR7	0.21686	7.46656	3.03652e-12	1.13479e-09	3.03652e-12	0.001	0.000358658
chr7:12584385_rs56344052	SCIN	0.625509	7.46481	3.06777e-12	7.9779e-10	3.06777e-12	0.001	0.000358658
chr5:95160294_rs3756704	GLRX	0.102645	7.46402	3.08199e-12	9.87622e-10	3.08199e-12	0.001	0.000358658
chr6:31610384_rs114859640	AIF1	-0.180616	-7.46046	3.1468e-12	5.92219e-10	3.1468e-12	0.001	0.000358658
chr10:111757674_rs10509906	ADD3	0.161726	7.45535	3.24236e-12	7.81047e-10	3.24236e-12	0.001	0.000358658
chr5:112180257_rs12189	SRP19	0.143329	7.45428	3.2627e-12	1.04296e-09	3.2627e-12	0.001	0.000358658
chr14:55594635_rs7160110	LGALS3	0.129053	7.45336	3.28027e-12	1.36353e-09	3.28027e-12	0.001	0.000358658
chr9:106875277_rs7854630	SMC2	-0.113933	-7.45162	3.31381e-12	1.24326e-09	3.31381e-12	0.001	0.000358658
chr4:88770819_rs10017912	SPP1	0.346567	7.44996	3.34616e-12	1.02167e-09	3.34616e-12	0.001	0.000358658
chr16:30757274_rs11862859	RNF40	-0.0610223	-7.43523	3.64667e-12	1.27297e-09	3.64667e-12	0.001	0.000358658
chr11:12153360_rs12269907	MICAL2	0.147177	7.42396	3.89457e-12	1.43364e-09	3.89457e-12	0.001	0.000358658
chr13:45685418_rs4941524	GTF2F2	0.213914	7.42354	3.90431e-12	2.06175e-09	3.90431e-12	0.001	0.000358658
chr19:54792079_rs431420	LILRA6	0.314929	7.41709	4.05388e-12	2.97852e-09	4.05388e-12	0.001	0.000358658
chr2:27432500_rs2580759	ATRAID	-0.0815153	-7.41682	4.06013e-12	1.23294e-09	4.06013e-12	0.001	0.000358658
chr16:696111_rs7203410	JMJD8	-0.16922	-7.41623	4.07426e-12	1.40789e-09	4.07426e-12	0.001	0.000358658
chr16:74742054_rs11647925	MLKL	0.129664	7.41603	4.07908e-12	1.40936e-09	4.07908e-12	0.001	0.000358658
chr18:21155861_rs61452023	NPC1	-0.138776	-7.41591	4.08179e-12	1.49567e-09	4.08179e-12	0.001	0.000358658
chr17:5368356_rs11658701	MIS12	-0.0888263	-7.41546	4.09245e-12	1.35781e-09	4.09245e-12	0.001	0.000358658
chr16:30380486_rs4238961	CD2BP2	-0.24748	-7.41048	4.21314e-12	1.45222e-09	4.21314e-12	0.001	0.000358658
chr1:234613050_rs544470	TARBP1	-0.117109	-7.40853	4.26127e-12	1.36407e-09	4.26127e-12	0.001	0.000358658
chr9:35689949_rs117790517	TPM2	0.322804	7.40813	4.27122e-12	1.58145e-09	4.27122e-12	0.001	0.000358658
chr17:73038746_rs9660	ATP5H	-0.0608729	-7.40639	4.31477e-12	1.42827e-09	4.31477e-12	0.001	0.000358658
chr4:3390272_rs13127597	RGS12	-0.208177	-7.40155	4.43805e-12	1.33911e-09	4.43805e-12	0.001	0.000358658
chr21:26878512_rs2829785	LINC00158	-0.269464	-7.39736	4.54782e-12	2.20251e-09	4.54782e-12	0.001	0.000358658
chr19:50036306_rs73582460	RCN3	-0.375547	-7.39554	4.59625e-12	3.35094e-09	4.59625e-12	0.001	0.000358658
chr1:28416855_rs2871807	EYA3	-0.165412	-7.39491	4.61297e-12	1.46853e-09	4.61297e-12	0.001	0.000358658
chr2:225778476_rs4673124	DOCK10	-0.0706739	-7.39423	4.63136e-12	1.39479e-09	4.63136e-12	0.001	0.000358658
chr7:44822731_rs7809515	H2AFV	-0.0728315	-7.39346	4.65223e-12	1.17382e-09	4.65223e-12	0.001	0.000358658
chr8:104452281_rs3098217	DCAF13	0.129056	7.38858	4.78609e-12	1.78099e-09	4.78609e-12	0.001	0.000358658
chr17:34823204_rs7208788	CCL3L1	-3.06752	-7.38652	4.84382e-12	1.59304e-09	4.84382e-12	0.001	0.000358658
chr6:10723449_rs1045911	TMEM14C	-0.141893	-7.38595	4.85999e-12	8.93892e-10	4.85999e-12	0.001	0.000358658
chr11:45827350_rs3808976	SLC35C1	-0.150133	-7.38557	4.87073e-12	1.75777e-09	4.87073e-12	0.001	0.000358658
chr12:27103449_rs146970669	TM7SF3	-0.123544	-7.3833	4.93562e-12	1.79009e-09	4.93562e-12	0.001	0.000358658
chr17:61813906_rs11871102	STRADA	0.0757242	7.38315	4.93993e-12	1.62368e-09	4.93993e-12	0.001	0.000358658
chr5:100162378_rs2544913	ST8SIA4	0.0651435	7.3783	5.08119e-12	1.58762e-09	5.08119e-12	0.001	0.000358658
chr2:27595756_rs1528533	PPM1G	0.052193	7.37684	5.12442e-12	1.53028e-09	5.12442e-12	0.001	0.000358658
chr22:21123949_rs165830	PI4KA	0.0771331	7.37621	5.1434e-12	2.27734e-09	5.1434e-12	0.001	0.000358658
chr13:48749487_rs4500616	ITM2B	-0.0845241	-7.37532	5.17003e-12	2.69017e-09	5.17003e-12	0.001	0.000358658
chr1:65888231_rs4655802	LEPROT	-0.10018	-7.37451	5.19437e-12	1.64194e-09	5.19437e-12	0.001	0.000358658
chr7:30012175_rs11983187	SCRN1	0.178445	7.37392	5.21225e-12	1.30516e-09	5.21225e-12	0.001	0.000358658
chr4:177287827_rs9790804	SPCS3	-0.0667879	-7.37344	5.22686e-12	1.56408e-09	5.22686e-12	0.001	0.000358658
chr17:34312337_rs9903158	CCL15-CCL14	-0.716143	-7.3716	5.28308e-12	1.73212e-09	5.28308e-12	0.001	0.000358658
chr8:124178926_rs76518853	FAM83A	-1.41085	-7.36892	5.36593e-12	1.9877e-09	5.36593e-12	0.001	0.000358658
chr9:140168614_rs13297305	NELFB	-0.0671598	-7.36832	5.38457e-12	1.97375e-09	5.38457e-12	0.001	0.000358658
chr4:77919265_rs6532761	2018-09-11	1899-12-29 21:35:27	-7.36792	5.39733e-12	1.61176e-09	5.39733e-12	0.001	0.000358658
chr3:158351500_rs62286645	GFM1	0.110819	7.36569	5.46749e-12	2.05788e-09	5.46749e-12	0.001	0.000358658
chr9:72749590_rs4744982	SMC5	-0.114087	-7.36459	5.50272e-12	2.01367e-09	5.50272e-12	0.001	0.000358658
chr5:172252452_rs4868216	ERGIC1	-0.096465	-7.36363	5.53345e-12	1.71841e-09	5.53345e-12	0.001	0.000358658
chr11:77776911_rs606732	NDUFC2-KCTD14	-0.0785107	-7.36153	5.60125e-12	2.00743e-09	5.60125e-12	0.001	0.000358658
chr8:67931245_rs111764178	COPS5	0.126906	7.3606	5.63156e-12	2.07738e-09	5.63156e-12	0.001	0.000358658
chr10:72507646_rs2688750	ADAMTS14	-0.346917	-7.35959	5.6648e-12	1.31664e-09	5.6648e-12	0.001	0.000358658
chr20:44025282_rs3092744	SDC4	-0.131693	-7.35484	5.82308e-12	2.17862e-09	5.82308e-12	0.001	0.000358658
chr1:145423326_rs76268105	NOTCH2NL	-0.33479	-7.35454	5.8334e-12	1.83106e-09	5.8334e-12	0.001	0.000358658
chr7:77161629_rs74302378	PTPN12	-0.115117	-7.35252	5.90217e-12	1.46561e-09	5.90217e-12	0.001	0.000358658
chr3:129303744_rs2625998	PLXND1	-0.119229	-7.35115	5.9494e-12	2.22981e-09	5.9494e-12	0.001	0.000358658
chr16:24842933_rs79080004	TNRC6A	0.0882929	7.35026	5.98012e-12	2.00636e-09	5.98012e-12	0.001	0.000358658
chr5:118659537_rs60161062	TNFAIP8	-0.0941703	-7.35013	5.98444e-12	1.85294e-09	5.98444e-12	0.001	0.000358658
chr7:18548613_rs17432462	HDAC9	-0.288765	-7.34796	6.06053e-12	1.50334e-09	6.06053e-12	0.001	0.000358658
chr16:55613522_rs1502007	LPCAT2	0.125357	7.34531	6.15447e-12	2.06121e-09	6.15447e-12	0.001	0.000358658
chr5:122372402_rs28373879	PPIC	0.228428	7.34161	6.28784e-12	1.94318e-09	6.28784e-12	0.001	0.000358658
chr7:72287019_rs13307678	SBDSP1	0.374373	7.34071	6.32076e-12	1.56483e-09	6.32076e-12	0.001	0.000358658
chr1:151089885_rs62621412	CDC42SE1	-0.114653	-7.3368	6.46581e-12	2.01596e-09	6.46581e-12	0.001	0.000358658
chr17:38770965_rs8074179	SMARCE1	0.0562499	7.33673	6.46825e-12	2.09396e-09	6.46825e-12	0.001	0.000358658
chr11:60097557_rs11605914	MS4A4A	-0.205582	-7.33417	6.56521e-12	2.33341e-09	6.56521e-12	0.001	0.000358658
chr2:109352542_rs826577	RANBP2	-0.0945055	-7.33197	6.64948e-12	1.95825e-09	6.64948e-12	0.001	0.000358658
chr19:54700585_rs158365	TSEN34	-0.305831	-7.33181	6.65541e-12	4.75681e-09	6.65541e-12	0.001	0.000358658
chr21:37459329_rs4817769	CBR1	0.233116	7.32886	6.77009e-12	3.20517e-09	6.77009e-12	0.001	0.000358658
chr3:146262021_rs2609858	PLSCR1	0.115669	7.32303	7.00268e-12	2.58904e-09	7.00268e-12	0.001	0.000358658
chr18:77156537_rs8096658	NFATC1	-0.127942	-7.31954	7.14585e-12	2.46255e-09	7.14585e-12	0.001	0.000358658
chr7:129022102_rs10954230	AHCYL2	0.107405	7.3181	7.2056e-12	1.76878e-09	7.2056e-12	0.001	0.000358658
chr10:74086103_rs7908857	DNAJB12	0.0506904	7.31562	7.31e-12	1.67009e-09	7.31e-12	0.001	0.000358658
chr7:150309413_rs62491782	GIMAP2	-0.0938023	-7.314	7.37881e-12	1.8091e-09	7.37881e-12	0.001	0.000358658
chr6:36094188_rs6922865	MAPK13	-0.134835	-7.31303	7.42028e-12	1.32456e-09	7.42028e-12	0.001	0.000358658
chr1:117600593_rs2477723	TTF2	-0.122454	-7.31265	7.43679e-12	2.30007e-09	7.43679e-12	0.001	0.000358658
chr14:71159023_rs17108384	TTC9	0.468979	7.31248	7.44393e-12	2.913e-09	7.44393e-12	0.001	0.000358658
chr9:114394275_rs10817199	DNAJC25	0.159617	7.31051	7.52945e-12	2.69517e-09	7.52945e-12	0.001	0.000358658
chr13:22067681_rs3818314	MICU2	0.0717677	7.3102	7.54288e-12	3.84637e-09	7.54288e-12	0.001	0.000358658
chr15:57297779_rs1820994	TCF12	-0.0654093	-7.31009	7.54787e-12	2.05976e-09	7.54787e-12	0.001	0.000358658
chr6:158360495_rs3805784	SNX9	0.15449	7.30597	7.72986e-12	1.37516e-09	7.72986e-12	0.001	0.000358658
chr3:186731157_rs10212190	ST6GAL1	-0.198698	-7.30283	7.8716e-12	2.88891e-09	7.8716e-12	0.001	0.000358658
chr1:6567249_rs4908553	PLEKHG5	0.55879	7.30044	7.98116e-12	2.45481e-09	7.98116e-12	0.001	0.000358658
chr1:160315563_rs73029440	NCSTN	-0.0880508	-7.29986	8.008e-12	2.46264e-09	8.008e-12	0.001	0.000358658
chr5:114809360_rs7735894	FEM1C	-0.0792078	-7.2962	8.17907e-12	2.49507e-09	8.17907e-12	0.001	0.000358658
chr9:115925998_rs12982	SLC31A2	-0.175822	-7.29377	8.29503e-12	2.95375e-09	8.29503e-12	0.001	0.000358658
chr10:69850466_rs8181450	HERC4	-0.0843493	-7.29332	8.31633e-12	1.88546e-09	8.31633e-12	0.001	0.000358658
chr15:80195199_rs2115535	MTHFS	0.233465	7.28745	8.60331e-12	2.33537e-09	8.60331e-12	0.001	0.000358658
chr20:60985627_rs2236201	CABLES2	-0.196531	-7.28513	8.71955e-12	3.18849e-09	8.71955e-12	0.001	0.000358658
chr16:30017895_rs3814880	TMEM219	0.0557348	7.28434	8.75923e-12	2.86933e-09	8.75923e-12	0.001	0.000358658
chr11:95239236_rs11825722	SESN3	-0.209171	-7.28254	8.85072e-12	3.0827e-09	8.85072e-12	0.001	0.000358658
chr19:18622683_rs2561043	ISYNA1	0.243364	7.27855	9.05744e-12	6.35698e-09	9.05744e-12	0.001	0.000358658
chr6:109756735_rs6907769	MICAL1	-0.103841	-7.27843	9.06358e-12	1.59667e-09	9.06358e-12	0.001	0.000358658
chr14:103494612_rs10137179	CDC42BPB	0.119653	7.27324	9.33899e-12	3.62001e-09	9.33899e-12	0.001	0.000358658
chr20:46355246_rs74372499	SULF2	0.282497	7.26686	9.68954e-12	3.52452e-09	9.68954e-12	0.001	0.000358658
chr22:17700284_rs8136533	CECR1	-0.0994414	-7.2662	9.72624e-12	4.06607e-09	9.72624e-12	0.001	0.000358658
chr11:122740083_rs17338045	CRTAM	0.448816	7.26609	9.73248e-12	3.3519e-09	9.73248e-12	0.001	0.000358658
chr17:48785039_rs12601696	ANKRD40	-0.159632	-7.26418	9.84018e-12	3.04858e-09	9.84018e-12	0.001	0.000358658
chr4:95254730_rs10516950	SMARCAD1	-0.0716385	-7.26233	9.94613e-12	2.87967e-09	9.94613e-12	0.001	0.000358658
chr3:119300655_rs1485331	ADPRH	0.1748	7.26192	9.96917e-12	3.59878e-09	9.96917e-12	0.001	0.000358658
chr5:150157644_rs77067738	RBM22	-0.125088	-7.25869	1.01571e-11	3.06792e-09	1.01571e-11	0.001	0.000358658
chr12:51483883_rs6580785	LETMD1	-0.103289	-7.25512	1.03681e-11	3.59399e-09	1.03681e-11	0.001	0.000358658
chr12:49472965_rs11168850	RHEBL1	0.102325	7.25506	1.03715e-11	3.59477e-09	1.03715e-11	0.001	0.000358658
chr17:17857722_rs4553680	SREBF1	-0.100592	-7.24904	1.07379e-11	3.30412e-09	1.07379e-11	0.001	0.000358658
chr6:90378808_rs761731	LYRM2	0.0704728	7.24843	1.07758e-11	1.876e-09	1.07758e-11	0.001	0.000358658
chr11:128586155_rs654723	FLI1	0.0934221	7.24817	1.07915e-11	3.68563e-09	1.07915e-11	0.001	0.000358658
chr1:206645543_rs35417888	IKBKE	0.141483	7.2481	1.07963e-11	3.2484e-09	1.07963e-11	0.001	0.000358658
chr11:5718975_rs12421805	TRIM22	0.0481226	7.24635	1.09057e-11	3.72266e-09	1.09057e-11	0.001	0.000358658
chr1:40301266_rs11206959	MYCL1	0.443979	7.24368	1.10746e-11	3.32653e-09	1.10746e-11	0.001	0.000358658
chr15:52685747_rs2693456	MYO5A	-0.166051	-7.24196	1.11851e-11	2.98751e-09	1.11851e-11	0.001	0.000358658
chr4:190872778_rs12646565	FRG1	-0.127248	-7.24159	1.12087e-11	3.22361e-09	1.12087e-11	0.001	0.000358658
chr6:24666194_rs3756815	TDP2	0.0953426	7.2369	1.15156e-11	1.99605e-09	1.15156e-11	0.001	0.000358658
chr12:98987445_rs28372744	SLC25A3	-0.0779446	-7.23407	1.17048e-11	4.02246e-09	1.17048e-11	0.001	0.000358658
chr6:31052632_rs115917409	HLA-L	-0.674849	-7.23261	1.18035e-11	2.04348e-09	1.18035e-11	0.001	0.000358658
chr8:66522802_rs2884199	ARMC1	-0.0883171	-7.23161	1.18717e-11	4.20164e-09	1.18717e-11	0.001	0.000358658
chr12:102233373_rs10860796	GNPTAB	0.0828635	7.23094	1.19175e-11	4.08933e-09	1.19175e-11	0.001	0.000358658
chr3:160025632_rs2275153	SMC4	-0.228084	-7.22945	1.20196e-11	4.27798e-09	1.20196e-11	0.001	0.000358658
chr22:17586631_rs4819959	IL17RA	-0.068618	-7.22458	1.23613e-11	5.08126e-09	1.23613e-11	0.001	0.000358658
chr15:85305142_rs11633788	SEC11A	-0.0576187	-7.22312	1.24654e-11	3.31275e-09	1.24654e-11	0.001	0.000358658
chr17:6995186_rs382598	CLEC10A	-0.19243	-7.22235	1.25209e-11	3.81371e-09	1.25209e-11	0.001	0.000358658
chr1:43637549_rs1691289	EBNA1BP2	-0.124338	-7.22172	1.25663e-11	3.7413e-09	1.25663e-11	0.001	0.000358658
chr3:120246705_rs7646555	FSTL1	0.265858	7.21612	1.29773e-11	4.58927e-09	1.29773e-11	0.001	0.000358658
chr12:76996981_rs11114651	OSBPL8	-0.111508	-7.21493	1.30668e-11	4.4633e-09	1.30668e-11	0.001	0.000358658
chr10:75733299_rs11000828	VCL	-0.0994686	-7.21291	1.32189e-11	2.90368e-09	1.32189e-11	0.001	0.000358658
chr1:203155882_rs4950928	CHI3L1	-0.998724	-7.21291	1.32192e-11	3.92553e-09	1.32192e-11	0.001	0.000358658
chr11:86440356_rs2433411	PRSS23	0.192078	7.21009	1.34348e-11	4.51503e-09	1.34348e-11	0.001	0.000358658
chr17:34822624_rs138153523	TBC1D3G	1.73967	7.20565	1.37819e-11	4.17895e-09	1.37819e-11	0.001	0.000358658
chr1:44127084_rs12142545	KDM4A	-0.0604105	-7.20476	1.38528e-11	4.10206e-09	1.38528e-11	0.001	0.000358658
chr7:43916138_rs1468405	URGCP-MRPS24	-0.143298	-7.2033	1.39692e-11	3.31796e-09	1.39692e-11	0.001	0.000358658
chr1:173987798_rs10798302	RC3H1	0.0718813	7.20041	1.42033e-11	4.1998e-09	1.42033e-11	0.001	0.000358658
chr10:81032532_rs1250546	ZMIZ1	-0.100203	-7.2001	1.42288e-11	3.10836e-09	1.42288e-11	0.001	0.000358658
chr15:83765994_rs1452116	TM6SF1	-0.124221	-7.19292	1.48272e-11	3.91006e-09	1.48272e-11	0.001	0.000358658
chr2:134963892_rs1257168	MGAT5	-0.112689	-7.18297	1.56978e-11	4.37572e-09	1.56978e-11	0.001	0.000358658
[truncated: 3,777 more rows]

## Sheet: ifn 32PCs
SNP	gene	beta	t-stat	p-value	FDR	gene.p.min.p	emp.p	emp.q
[truncated: 5,652 more rows]

[truncated: 3 more sheets: baseline 16 PCs matched 84, flu 16 PCs matched 84, ifn 16 PCs matched 84]
