# Supplementary material for: Genetic analysis of isoform usage in the human anti-viral response reveals influenza-specific regulation of ERAP2 transcripts under balancing selection
Source: Genome Res. 2018 Dec;28(12):1812–25. doi: 10.1101/gr.240390.118 (PMC6280757; doi:10.1101/gr.240390.118)
Supplement: Supplemental Material [file supp_gr.240390.118_SupplementalTable8.xlsx]

## Sheet: flu.base pc4 risoQTL
SNP	gene	beta	t-stat	p-value	FDR	gene.p.min.p	emp.p	emp.q
chr14:100815146_rs7144866	TCONS_00010031_WARS	-19.0963	-20.0826	2.5028e-29	5.98695e-23	2.5028e-29	8.79585e-08	6.62703e-05
chr20:56180563_rs6025653	TCONS_00020831_ZBP1	16.8393	16.3453	1.57923e-24	3.49158e-18	1.57923e-24	8.79585e-08	6.62703e-05
chr22:41606395_rs7289858	TCONS_00021597_L3MBTL2	-31.3802	-14.1162	2.51539e-21	1.33472e-15	2.51539e-21	8.79585e-08	6.62703e-05
chr14:100832282_rs2146105	TCONS_00010037_WARS	13.2847	11.6746	1.66705e-17	2.19916e-12	1.66705e-17	8.79585e-08	6.62703e-05
chr22:41606395_rs7289858	TCONS_00021598_L3MBTL2	21.4236	11.4629	3.70208e-17	2.53191e-12	3.70208e-17	8.79585e-08	6.62703e-05
chr19:48575216_rs62129319	TCONS_00017013_PLA2G4C	-8.24255	-10.9463	2.65246e-16	1.6794e-09	2.65246e-16	8.79585e-08	6.62703e-05
chr22:39355110_rs1977068	TCONS_00021562_APOBEC3G	-31.6521	-10.7073	6.66534e-16	2.5506e-11	6.66534e-16	8.79585e-08	6.62703e-05
chr22:39355110_rs1977068	TCONS_00021581_APOBEC3G	31.6521	10.7073	6.66534e-16	2.5506e-11	6.66534e-16	8.79585e-08	6.62703e-05
chr6:53377834_rs574389	TCONS_00028252_GCLC	-9.10312	-10.0969	7.20557e-15	6.83055e-09	7.20557e-15	8.79585e-08	6.62703e-05
chr6:53377834_rs574389	TCONS_00028251_GCLC	9.10312	10.0969	7.20557e-15	6.83055e-09	7.20557e-15	8.79585e-08	6.62703e-05
chr6:86223316_rs12203963	TCONS_00028312_SNHG5	-12.7739	-9.89536	1.59391e-14	1.16443e-08	1.59391e-14	8.79585e-08	6.62703e-05
chr14:100820536_rs3783345	TCONS_00010022_WARS	9.26747	9.86656	1.786e-14	9.12035e-10	1.786e-14	8.79585e-08	6.62703e-05
chr20:56180563_rs6025653	TCONS_00020828_ZBP1	-6.94952	-9.53125	6.75303e-14	2.43144e-08	6.75303e-14	8.79585e-08	6.62703e-05
chr22:41610667_rs139457	TCONS_00021599_L3MBTL2	10.3099	8.83533	1.0972e-12	2.55567e-08	1.0972e-12	5.27751e-07	0.00036922
chr5:96244585_rs2548527	TCONS_00025657_ERAP2	-12.9465	-8.74737	1.56415e-12	6.64934e-07	1.56415e-12	6.15709e-07	0.00040204
chr7:134809346_rs10268206	TCONS_00030187_C7orf49	-8.94358	-8.61579	2.66044e-12	8.42196e-07	2.66044e-12	7.03668e-07	0.000430757
chr2:202012068_rs13387186	TCONS_00018386_CFLAR	2.25666	8.53415	3.70059e-12	4.03025e-06	3.70059e-12	1.0555e-06	0.000608128
chr5:96230122_rs2549781	TCONS_00025658_ERAP2	-13.5016	-8.49227	4.38353e-12	6.85592e-07	4.38353e-12	1.40734e-06	0.000765791
chr20:56181949_rs4811887	TCONS_00020833_ZBP1	-14.3605	-8.28458	1.01636e-11	2.7316e-06	1.01636e-11	1.49529e-06	0.000770829
chr6:129813346_rs1889891	TCONS_00027539_LAMA2	36.2754	8.05648	2.56336e-11	4.48436e-06	2.56336e-11	2.19896e-06	0.00107689
chr20:3460006_rs151557	TCONS_00019840_ATRN	9.01664	7.87692	5.31317e-11	1.14781e-05	5.31317e-11	3.51834e-06	0.00164098
chr22:45697031_rs226512	TCONS_00021637_FAM118A	13.4337	7.24847	6.80746e-10	8.4161e-06	6.80746e-10	1.02032e-05	0.00434503
chr22:45697031_rs226512	TCONS_00021636_FAM118A	-13.4337	-7.24847	6.80746e-10	8.4161e-06	6.80746e-10	1.02032e-05	0.00434503
chr13:114522595_rs7999037	TCONS_00045922_add_GAS6-AS1	6.2287	7.20581	8.0914e-10	0.00137002	8.0914e-10	1.16105e-05	0.00473833
chr12:123200527_rs118091133	TCONS_00008307_HCAR1	-19.3796	-7.1618	9.66978e-10	0.00151545	9.66978e-10	1.33697e-05	0.00501524
chr11:60155000_rs7935082	TCONS_00005121_MS4A7	-7.68721	-7.1588	9.7881e-10	0.000797226	9.7881e-10	1.34576e-05	0.00501524
chr11:66202215_rs3107024	TCONS_00005346_DPP3	-8.98856	-7.13598	1.07355e-09	0.000797226	1.07355e-09	1.42493e-05	0.00501524
chr11:60155000_rs7935082	TCONS_00005120_MS4A7	7.2458	7.12823	1.10776e-09	0.000797226	1.10776e-09	1.43372e-05	0.00501524
chr1:79094081_rs1333973	TCONS_00000601_IFI44L	8.94434	7.07515	1.37305e-09	0.00866583	1.37305e-09	1.63603e-05	0.00552557
chr1:79094081_rs1333973	TCONS_00000600_IFI44L	-13.9021	-7.04841	1.52984e-09	0.00866583	1.52984e-09	1.72399e-05	0.00562856
chr7:134855492_rs292507	TCONS_00029374_TMEM140	-16.75	-7.03937	1.58679e-09	4.44644e-05	1.58679e-09	1.78556e-05	0.00564153
chr7:134781166_rs73153765	TCONS_00029369_TMEM140	44.5308	7.02602	1.67481e-09	4.61583e-05	1.67481e-09	1.8999e-05	0.00581522
chr6:129804089_rs2571585	TCONS_00027541_LAMA2	-14.8254	-7.00057	1.85622e-09	0.000144231	1.85622e-09	2.04064e-05	0.00605671
chr6:31321479_rs149032880	TCONS_00027027_MICA	-28.6694	-6.86309	3.23312e-09	0.000209664	3.23312e-09	2.7619e-05	0.00795634
chr11:2144445_rs4529869	TCONS_00005872_IGF2	-18.146	-6.78413	4.44411e-09	0.000817043	4.44411e-09	3.26326e-05	0.00906983
chr4:2815632_rs433030	TCONS_00024108_SH3BP2	-13.2686	-6.77358	4.637e-09	0.000602964	4.637e-09	3.33363e-05	0.00906983
chr7:94820252_rs17166696	TCONS_00159755_add_PDK4	-22.7415	-6.61697	8.70166e-09	0.000150585	8.70166e-09	4.74976e-05	0.0125735
chr10:82214065_rs116857892	TCONS_00003940_TSPAN14	-8.31082	-6.5418	1.17621e-08	0.0233557	1.17621e-08	5.7173e-05	0.0147364
chr5:35881443_rs11742270	TCONS_00025357_IL7R	-8.14054	-6.40851	2.00435e-08	0.000207767	2.00435e-08	7.73155e-05	0.0189318
chr5:35881443_rs11742270	TCONS_00025356_IL7R	8.14054	6.40851	2.00435e-08	0.000207767	2.00435e-08	7.73155e-05	0.0189318
chr12:123192848_rs2454705	TCONS_00008283_HCAR1	30.7382	6.39683	2.10005e-08	0.00587365	2.10005e-08	8.06579e-05	0.0192685
chr3:73100154_rs11128306	TCONS_00022616_PPP4R2	-5.44324	-6.33847	2.65025e-08	0.00405653	2.65025e-08	9.30601e-05	0.0211973
chr3:73100154_rs11128306	TCONS_00022618_PPP4R2	5.44324	6.33847	2.65025e-08	0.00405653	2.65025e-08	9.30601e-05	0.0211973
chr1:120131751_rs346678	TCONS_00002632_ZNF697	-29.5885	-6.20718	4.46695e-08	0.050592	4.46695e-08	0.000135544	0.0295021
chr1:120131751_rs346678	TCONS_00002631_ZNF697	29.5885	6.20718	4.46695e-08	0.050592	4.46695e-08	0.000135544	0.0295021
chr11:2119283_rs11042599	TCONS_00025414_add_IGF2-AS	24.3386	6.16624	5.25414e-08	0.00429432	5.25414e-08	0.000153224	0.0326252
chr19:48573276_rs7248052	TCONS_00017018_PLA2G4C	7.69025	6.0819	7.33564e-08	0.0375791	7.33564e-08	0.000191398	0.0394681
chr6:31338528_rs115743983	TCONS_00027024_MICA	16.4166	6.07867	7.42977e-08	0.00257559	7.42977e-08	0.000193421	0.0394681
chr2:102759293_rs1800919	TCONS_00017920_IL1R1	-9.54021	-6.0483	8.37613e-08	0.0227567	8.37613e-08	0.0002111	0.0414905
chr12:109014241_rs59367899	TCONS_00008133_CORO1C	-21.3322	-6.04716	8.41402e-08	0.0141392	8.41402e-08	0.000211804	0.0414905
chr5:96247750_rs10463196	TCONS_00025647_ERAP2	18.3846	6.00595	9.89827e-08	0.000960505	9.89827e-08	0.000240039	0.0460995
chr16:76041248_rs6564301	TCONS_00012450_KARS	-2.37645	-5.98462	1.07658e-07	0.0554878	1.07658e-07	0.000256135	0.0473345
chr16:76041248_rs6564301	TCONS_00012451_KARS	2.37645	5.98462	1.07658e-07	0.0554878	1.07658e-07	0.000256135	0.0473345

## Sheet: ifn.base pc4 risoQTL
SNP	gene	beta	t-stat	p-value	FDR	gene.p.min.p	emp.p	emp.q
chr22:41606395_rs7289858	TCONS_00021597_L3MBTL2	-29.856	-19.3505	1.93569e-28	3.20428e-22	1.93569e-28	1.26218e-07	0.000150244
chr22:41606395_rs7289858	TCONS_00021598_L3MBTL2	26.1885	18.8353	8.4446e-28	3.20428e-22	8.4446e-28	1.26218e-07	0.000150244
chr14:100820536_rs3783345	TCONS_00010031_WARS	-17.6748	-17.3455	7.0329e-26	1.2963e-19	7.0329e-26	1.26218e-07	0.000150244
chr20:56180563_rs6025653	TCONS_00020831_ZBP1	7.4083	13.5778	1.64013e-20	3.36227e-14	1.64013e-20	1.26218e-07	0.000150244
chr2:218939511_rs4672869	TCONS_00018527_RUFY4	8.54422	11.1587	1.17604e-16	3.92966e-10	1.17604e-16	1.26218e-07	0.000150244
chr14:100827429_rs2146107	TCONS_00010037_WARS	11.946	10.6415	8.59841e-16	8.31358e-11	8.59841e-16	1.26218e-07	0.000150244
chr5:52084500_rs7706108	TCONS_00025424_ITGA1	-10.5175	-10.4361	1.9103e-15	5.08765e-10	1.9103e-15	1.26218e-07	0.000150244
chr5:52084500_rs7706108	TCONS_00025423_ITGA1	10.5175	10.4361	1.9103e-15	5.08765e-10	1.9103e-15	1.26218e-07	0.000150244
chr6:32567491_rs9270715	TCONS_00027994_HLA-DRB5	-2.80567	-9.16281	2.9425e-13	4.2352e-07	2.9425e-13	1.00974e-06	0.0010684
chr14:100820536_rs3783345	TCONS_00010022_WARS	7.91069	8.82802	1.13e-12	5.44257e-08	1.13e-12	1.89327e-06	0.00163903
chr7:134850725_rs6585	TCONS_00029374_TMEM140	-13.1448	-8.76026	1.48493e-12	4.17111e-07	1.48493e-12	1.89327e-06	0.00163903
chr22:39355110_rs1977068	TCONS_00021562_APOBEC3G	-19.4108	-8.11726	2.00306e-11	2.90028e-07	2.00306e-11	6.43711e-06	0.00471535
chr22:39355110_rs1977068	TCONS_00021581_APOBEC3G	19.4108	8.11726	2.00306e-11	2.90028e-07	2.00306e-11	6.43711e-06	0.00471535
chr4:2802877_rs444521	TCONS_00024108_SH3BP2	-10.9665	-7.81882	6.7269e-11	8.32886e-05	6.7269e-11	1.04761e-05	0.00697133
chr14:65376736_rs17102298	TCONS_00009347_CHURC1-FNTB	3.12136	7.77014	8.19698e-11	3.03251e-06	8.19698e-11	1.09809e-05	0.00697133
chr1:79094081_rs1333973	TCONS_00000601_IFI44L	9.61226	7.67415	1.21042e-10	0.0012094	1.21042e-10	1.24956e-05	0.00743708
chr13:114519894_rs12860172	TCONS_00045922_add_GAS6-AS1	5.82535	7.62295	1.49011e-10	9.0289e-05	1.49011e-10	1.43888e-05	0.00806016
chr1:79094081_rs1333973	TCONS_00000600_IFI44L	-15.7451	-7.53436	2.13504e-10	0.0012094	2.13504e-10	1.74181e-05	0.00921497
chr12:121886921_rs10849886	TCONS_00007478_RNF34	9.42066	7.34173	4.66457e-10	0.000518802	4.66457e-10	2.37289e-05	0.0112984
chr12:121886921_rs10849886	TCONS_00007480_RNF34	-9.42066	-7.34173	4.66457e-10	0.000518802	4.66457e-10	2.37289e-05	0.0112984
chr12:123200527_rs118091133	TCONS_00008307_HCAR1	-18.1048	-7.15146	1.00835e-09	0.000518802	1.00835e-09	3.38264e-05	0.0153392
chr6:32584693_rs115958123	TCONS_00027142_HLA-DQA1	1.4878	7.10527	1.21557e-09	6.82717e-05	1.21557e-09	3.62245e-05	0.01568
chr12:123192848_rs2454705	TCONS_00008283_HCAR1	33.5235	6.93359	2.43272e-09	0.000518802	2.43272e-09	5.5662e-05	0.0222121
chr17:18199150_rs8081343	TCONS_00012869_SMCR8	-12.0143	-6.90627	2.71636e-09	0.000467235	2.71636e-09	5.83126e-05	0.0222121
chr17:18199150_rs8081343	TCONS_00012868_SMCR8	12.0143	6.90627	2.71636e-09	0.000467235	2.71636e-09	5.83126e-05	0.0222121
chr11:2699051_rs11023738	TCONS_00005872_IGF2	-9.91691	-6.68525	6.61487e-09	0.0437923	6.61487e-09	8.50708e-05	0.0311583
chr6:32611376_rs9272982	TCONS_00027137_HLA-DQA1	1.85662	6.53996	1.18491e-08	0.000424649	1.18491e-08	0.000113722	0.0401096
chr4:39455378_rs2249563	TCONS_00024757_RPL9	-1.44886	-6.45098	1.69163e-08	0.00394047	1.69163e-08	0.000136315	0.046361
chr20:56181949_rs4811887	TCONS_00020828_ZBP1	-5.12219	-6.41313	1.96773e-08	0.00333189	1.96773e-08	0.000146665	0.048161
chr6:32609427_rs9272723	TCONS_00027144_HLA-DQA1	-2.28776	-6.39423	2.12198e-08	0.000462412	2.12198e-08	0.000152723	0.0484788

## Sheet: flu.ifn pc4 risoQTL
SNP	gene	beta	t-stat	p-value	FDR	gene.p.min.p	emp.p	emp.q
chr6:24811571_rs6932829	TCONS_00027823_FAM65B	7.11918	11.2348	8.79942e-17	1.22382e-10	8.79942e-17	1.25758e-07	0.000659784
chr20:56180563_rs6025653	TCONS_00020831_ZBP1	9.67273	10.8292	4.16277e-16	7.57515e-10	4.16277e-16	2.51516e-07	0.000659784
chr19:48575216_rs62129319	TCONS_00017013_PLA2G4C	-7.57797	-10.4329	1.93383e-15	1.31011e-08	1.93383e-15	3.77274e-07	0.000659784
chr6:53377834_rs574389	TCONS_00028251_GCLC	9.60565	10.3039	3.20048e-15	8.32555e-10	3.20048e-15	3.77274e-07	0.000659784
chr6:53377834_rs574389	TCONS_00028252_GCLC	-9.60565	-10.3039	3.20048e-15	8.32555e-10	3.20048e-15	3.77274e-07	0.000659784
chr5:96247750_rs10463196	TCONS_00025657_ERAP2	-13.6035	-10.228	4.30733e-15	2.96944e-09	4.30733e-15	5.03032e-07	0.000733094
chr5:96230122_rs2549781	TCONS_00025658_ERAP2	-14.9759	-9.59533	5.23362e-14	7.03249e-09	5.23362e-14	7.54548e-07	0.000942549
chr6:86208096_rs9450285	TCONS_00028312_SNHG5	-11.3759	-9.39801	1.14858e-13	2.39549e-08	1.14858e-13	1.00606e-06	0.00109964
chr7:134797058_rs10155910	TCONS_00030187_C7orf49	-9.13686	-8.90561	8.26785e-13	4.10771e-07	8.26785e-13	1.76061e-06	0.00164946
chr20:3460006_rs151557	TCONS_00019840_ATRN	9.48568	8.87183	9.47199e-13	7.67341e-07	9.47199e-13	1.88637e-06	0.00164946
chr2:202007013_rs56230518	TCONS_00018386_CFLAR	2.01635	8.63653	2.4467e-12	4.33823e-06	2.4467e-12	2.64092e-06	0.00209931
chr2:218939511_rs4672869	TCONS_00018504_RUFY4	8.44252	7.83773	6.22969e-11	2.82086e-05	6.22969e-11	6.91669e-06	0.00504002
chr18:2968752_rs625527	TCONS_00014936_LPIN2	7.56923	7.56959	1.85053e-10	0.000193261	1.85053e-10	1.06894e-05	0.00718996
chr6:129807714_rs2229850	TCONS_00027541_LAMA2	-15.7077	-7.34777	4.55173e-10	3.89093e-05	4.55173e-10	1.47137e-05	0.00918985
chr7:94810889_rs139538303	TCONS_00159755_add_PDK4	-22.6416	-7.1747	9.17775e-10	2.57175e-05	9.17775e-10	2.01213e-05	0.0117295
chr22:39359345_rs3985950	TCONS_00021581_APOBEC3G	18.6653	6.95759	2.20814e-09	0.00191875	2.20814e-09	2.90501e-05	0.0149422
chr22:39359345_rs3985950	TCONS_00021562_APOBEC3G	-18.6653	-6.95759	2.20814e-09	0.00191875	2.20814e-09	2.90501e-05	0.0149422
chr11:60173360_rs4938941	TCONS_00005120_MS4A7	7.00049	6.86216	3.2453e-09	0.0037626	3.2453e-09	3.49607e-05	0.015445
chr3:113779363_rs140657739	TCONS_00022702_QTRTD1	48.2864	6.81921	3.8585e-09	0.00584378	3.8585e-09	3.83562e-05	0.015445
chr4:119223646_rs788646	TCONS_00024464_SNHG8	-11.0231	-6.81565	3.91438e-09	0.000609837	3.91438e-09	3.84819e-05	0.015445
chr4:119223646_rs788646	TCONS_00024463_SNHG8	11.0231	6.81565	3.91438e-09	0.000609837	3.91438e-09	3.84819e-05	0.015445
chr6:24827655_rs4513786	TCONS_00027822_FAM65B	-14.2135	-6.81279	3.95973e-09	0.000248191	3.95973e-09	3.88592e-05	0.015445
chr11:60173360_rs4938941	TCONS_00005121_MS4A7	-7.61052	-6.73605	5.39289e-09	0.0037626	5.39289e-09	4.57759e-05	0.017403
chr12:2730498_rs216015	TCONS_00006737_WNT5B	-1.4976	-6.52576	1.25428e-08	0.00982415	1.25428e-08	7.50775e-05	0.0273536
chr7:47082217_rs6953985	TCONS_00158800_add_PKD1L1	22.8877	6.49036	1.44519e-08	0.000225352	1.44519e-08	8.18684e-05	0.0282946
chr12:113357193_rs10774671	TCONS_00007433_OAS1	1.80274	6.47864	1.51452e-08	0.00982415	1.51452e-08	8.41321e-05	0.0282946
chr2:218939511_rs4672869	TCONS_00018527_RUFY4	-7.22024	-6.3101	2.9673e-08	0.00653654	2.9673e-08	0.000128902	0.0415507
chr9:32455674_rs1133071	TCONS_00032205_DDX58	1.69827	6.29451	3.15715e-08	0.160361	3.15715e-08	0.000133052	0.0415507
chr6:32611376_rs9272982	TCONS_00027137_HLA-DQA1	-2.96714	-6.21549	4.32188e-08	0.00200686	4.32188e-08	0.000161725	0.0429454
chr5:180232480_rs58072284	TCONS_00026700_MGAT1	1.10343	6.21398	4.34795e-08	0.000439562	4.34795e-08	0.000162354	0.0429454
chr20:1889201_rs4814731	TCONS_00020282_SIRPB1	-15.3349	-6.18655	4.84779e-08	0.00261818	4.84779e-08	0.000175181	0.0429454
chr20:1889201_rs4814731	TCONS_00020272_SIRPB1	15.3349	6.18655	4.84779e-08	0.00261818	4.84779e-08	0.000175181	0.0429454
chr3:73045651_rs9816164	TCONS_00022616_PPP4R2	-5.94838	-6.1835	4.90666e-08	0.00584378	4.90666e-08	0.000176187	0.0429454
chr3:73045651_rs9816164	TCONS_00022618_PPP4R2	5.94838	6.1835	4.90666e-08	0.00584378	4.90666e-08	0.000176187	0.0429454
chr6:32587416_rs9271386	TCONS_00027994_HLA-DRB5	2.06645	6.18235	4.92918e-08	0.00219642	4.92918e-08	0.000176816	0.0429454
chr6:32626696_rs34865969	TCONS_00028024_HLA-DQB2	2.43625	6.18208	4.93448e-08	0.00219642	4.93448e-08	0.000177067	0.0429454
chr5:96247750_rs10463196	TCONS_00025647_ERAP2	15.4413	6.16979	5.18071e-08	0.000521766	5.18071e-08	0.00018172	0.0429454
chr6:31323468_rs3897530	TCONS_00027027_MICA	-23.3179	-6.14628	5.68652e-08	0.00238976	5.68652e-08	0.000194673	0.0447187
chr19:48573276_rs7248052	TCONS_00017018_PLA2G4C	7.00961	6.13638	5.91386e-08	0.0317429	5.91386e-08	0.000199452	0.0447187
chr14:100832282_rs2146105	TCONS_00010037_WARS	1.87119	6.1085	6.6034e-08	0.0116405	6.6034e-08	0.000215801	0.0471746
